# Supplementary material for: Genetic architecture of natural variation of cardiac performance from flies to humans
Source: eLife. 2022 Nov 16;11:e82459. doi: 10.7554/eLife.82459 (PMC9668334; doi:10.7554/eLife.82459)
Supplement: Figure 1—source data 1. — Individual and DGRP line number are indicated. Phenotypic values were determined from high-speed video recording on dissected flies and movie analysis using Semi-automated Heartbeat Analysis (SOHA) (Mackay et al., 2012). [file elife-82459-fig1-data1.xlsx]

## Sheet: phenotype_data_REMOVE_OUTLIERS_
individual_name	age	date	strain_number	DI_on_Hp_Mean	DiastolicIntervals_Mean	DiastolicIntervals_Median	DiastolicIntervals_StdDev	DiastolicIntervals_StdDevOnMedian	DiastolicMeanDiameter	FractionalShortening	Heartperiod_Mean	Heartperiod_Median	Heartperiod_StdDev	Heartperiod_StdDevOnMedian	Heartrate_Mean	Heartrate_Median	Heartrate_StdDev	Heartrate_StdDevOnMedian	NormalizedIntervals_Mean	NormalizedIntervals_Median	NormalizedIntervals_StdDev	NormalizedIntervals_StdDevOnMedian	Pcent_Long_DI	Pcent_Long_SI	SD_on_Median_Heartperiod	SI_on_DI_Mean	SystolicIntervals_Mean	SystolicIntervals_Median	SystolicIntervals_SI_on_Hp_Mean	SystolicIntervals_StdDev	SystolicIntervals_StdDevOnMedian	SystolicMeanDiameter	Total_DI	Total_DI_Time	Total_SI	Total_SI_Time
dgrp101_01_1wf_9100_20s_180614	1	180614	dgrp101	0.815070182077512	0.906178411315469	0.866726398468018	0.117245129431074	0.135273518423242	75.6201083014726	0.372976422220564	1.1117796126534	1.07175922393799	0.118683390993971	0.110736990494833	0.907516567158047	0.933045387121259	0.0848129610315488	0.0908990732950556	0.229640810078032	0.233331182539572	0.0233556609207786	0.100096612319777	11.7647058823529	NA	0.110736990494833	0.226888214032226	0.205601201337927	0.205032348632813	0.184929817922488	0.00392114651833036	0.0191245261758799	47.4155908592578	17	15.405032992363	17	3.49522042274475
dgrp101_02_1wf_9100_20s_180614	1	180614	dgrp101	0.532401824812506	0.365886995085964	0.298225164413452	0.174926576296858	0.586558738733207	NA	NA	0.687238431639142	0.587155342102051	0.217509363606872	0.370446026818347	1.54867437626204	1.70312680187826	0.374368555585047	0.219812497326789	1.01641790125036	0.966666155019008	0.437034422432809	0.452104814225357	NA	NA	0.370446026818347	0.874204097221372	0.319859910224165	0.27958869934082	0.465427856619228	0.103696305432424	0.370888757939454	NA	27	9.87894886732101	28	8.95607748627663
dgrp101_03_1wf_9100_20s_180614	1	180614	dgrp101	0.709497655591897	0.590792285359424	0.624423980712891	0.155004509006517	0.248235996365085	89.117307697495	0.342802155306032	0.832690961982893	0.857412338256836	0.173286688695731	0.202104262982769	1.28284116901063	1.16629998820993	0.438315338122656	0.375816978953582	0.546515609695624	0.363610992674135	0.685995719485391	NA	NA	NA	0.202104262982769	0.408161847223021	0.241138870517413	0.232990741729736	0.289589873706792	0.0592630330280786	0.254357888163738	58.5677025437229	23	13.5882225632668	24	5.78733289241791
dgrp101_04_1wf_9100_20s_180614	1	180614	dgrp101	0.682408467484952	0.621747672557831	0.335369110107422	0.525916897261749	1.56817333920018	103.17233762012	0.394217467184617	0.911107792740776	0.633740425109863	0.522696912138056	0.824780764218163	1.38669782669796	1.57793311011625	0.643839333995032	0.408027013228463	0.813821623684715	0.775004221093186	0.599408609081395	0.773426250809183	33.3333333333333	NA	0.824780764218163	0.465397994965604	0.289360120182946	0.288932800292969	0.317591532515048	0.0120207131095373	0.0416038369383768	62.5	21	13.0567011237144	21	6.07656252384186
dgrp101_05_1wf_9100_20s_180614	1	180614	dgrp101	0.831905764975984	NA	0.903996467590332	NA	1.86511824677751	97.327571889984	0.341784668455366	NA	1.1742696762085	NA	1.43541388386957	1.19757293218779	1.05210898196143	0.751176648769142	NA	0.57031940953816	0.416743191646031	0.493509459080162	1.18420521072204	41.6666666666667	NA	1.43541388386957	0.202059226057737	0.260182718435923	0.270257949829102	0.168094235024017	0.0188269322844961	0.0696628250765661	64.0625	12	15.4518686532974	12	3.12219262123108
dgrp101_06_1wf_9100_20s_180614	1	180614	dgrp101	0.644913220669856	0.408502391974131	0.428699493408203	0.0675700426102883	0.157616334167087	89.6808580480711	0.421318652991714	0.633422263463338	0.6523756980896	0.0692609994310401	0.106167350552545	1.60169751689113	1.53306412232044	0.231704243198339	0.151137998616544	0.57135337165919	0.53334341465855	0.141242940924881	0.26482550837401	NA	NA	0.106167350552545	0.549761830503351	0.224579022776696	0.223672866821289	0.354548672711272	0.00503409213692457	0.0225064944553455	51.8966397361167	30	12.2550717592239	31	6.96194970607758
dgrp101_07_1wf_9100_20s_180614	1	180614	dgrp101	0.707538056724852	0.677533355355263	0.615095734596252	0.395577771247818	0.643115776940762	86.0652880493747	0.436906547003225	0.957592809200287	0.89468240737915	0.403191870551158	0.450653625494049	1.16231295375189	1.12947583624703	0.325175204363599	0.287899213004925	0.49736857445938	0.491808586305929	0.181808001280415	0.369672279709492	15	NA	0.450653625494049	0.412009278682843	0.279150029023488	0.27959156036377	0.291512244391867	0.0126916631271706	0.045393584522572	48.4628002308845	20	13.5506671071053	21	5.86215060949326
dgrp101_08_1wf_9100_20s_180614	1	180614	dgrp101	0.593210087677563	0.352041240661375	0.177064895629883	0.36268376619123	2.04830982957426	73.026121581961	0.338340814447055	0.593451203838472	0.410074234008789	0.370742850444983	0.904087162025979	2.08206226912722	NA	0.862867622212649	0.353839779229837	1.26408365753276	1.29487618661862	0.886021875249244	0.684252196777947	9.67741935483871	NA	0.904087162025979	0.708987292786569	0.249592766165733	0.233009338378906	0.420578414116199	0.0679096907309219	0.29144621929483	48.3184041300106	31	10.9132784605026	32	7.98696851730347
dgrp105_01_1wf_9100_20s_180614	1	180614	dgrp105	0.579971295182206	0.307041610280673	0.288911104202271	0.0950914599148257	0.329137435466139	80.4346104764609	0.324275371482654	0.529408287670877	0.51258373260498	0.0944158946089578	0.184196041745474	1.93972359928836	1.98654890326199	0.299906373966333	0.150968533155099	0.778158648494383	0.774070861963826	0.199388540903159	0.257584351382648	NA	NA	0.184196041745474	0.724336561758938	0.22240146430763	0.223671436309814	0.420094413871158	0.010056272761315	0.0449600222863761	54.351647284144	36	11.0534979701042	37	8.22885417938232
dgrp105_02_1wf_9100_20s_180614	1	180614	dgrp105	0.658997471754959	0.512948325872421	0.46598219871521	0.232145306654635	0.498184924863436	104.699159798443	0.455335660464454	0.77837677359581	0.661694884300232	0.283898650491618	0.429047673221551	1.40839870733578	1.51127056250033	0.404796639334546	0.267851865429595	0.623824355644867	0.643130588171517	0.298613505003059	0.464312397039063	4	NA	0.429047673221551	0.517121283367121	0.265256496576162	0.260951995849609	0.340781618329612	NA	NA	57.0258987215458	25	12.8237081468105	26	6.89666891098022
dgrp105_03_1wf_9100_20s_180614	1	180614	dgrp105	0.76757231182995	0.777472969732786	0.326184272766113	1.09713835041267	NA	83.1801978387885	0.3936625488775	1.01289866472545	0.559179306030273	1.09870669062879	NA	1.58117575096791	1.78833513546701	0.710873313890062	0.397505646336486	0.681978666493447	0.799207645336052	0.39500749882324	0.494248899054446	21.0526315789474	NA	NA	0.30280884887044	0.235425694992668	0.232992649078369	0.23242768817005	0.0122815157996811	0.0527120312518961	50.4352691414363	19	14.7719864249229	19	4.47308820486069
dgrp105_04_1wf_9100_20s_180614	1	180614	dgrp105	0.74137417472413	0.637540700760755	0.596460342407227	0.191428279936271	0.320940499017412	93.0028429004539	0.394550286015906	0.85994457656687	0.810821533203125	0.195369011324818	0.24095192755059	1.21236783876956	1.23333443111941	0.237188320206667	0.192314683042934	0.373673526000175	0.363634672244127	0.0916218622346095	0.251961293099958	4.54545454545455	NA	0.24095192755059	0.34956890142253	0.222864402377087	0.223658561706543	0.259161355801349	0.0113236740629984	0.0506292894696155	56.3085446337874	22	14.0258954167366	23	5.125881254673
dgrp105_05_1wf_9100_20s_180614	1	180614	dgrp105	0.782186722340804	1.08616573160345	0.736250877380371	0.888330603261816	1.20655965317495	83.1801978387885	0.35445722344797	1.38862716609781	1.05322265625	0.882419222083321	0.837827801032286	0.864946397648619	0.949466852109411	0.267628444731227	0.281872341447879	0.365682687062197	0.392579159731352	0.130466845235805	0.332332580580907	18.1818181818182	NA	0.837827801032286	0.277427478760816	NA	NA	0.217000090299196	0.0208449769733426	0.0699256758609316	53.6963758669987	11	11.9478230476379	12	3.61598664522171
dgrp105_06_1wf_9100_20s_180614	1	180614	dgrp105	0.648114794008385	0.449358459029879	0.428836822509766	0.109170032046673	0.254572430155963	83.0480141619894	0.355898100734699	0.693331587527479	0.671146869659424	0.118446029533814	0.176483024637989	1.48347922272017	1.51127355744009	0.251884789428166	0.166670546300584	0.572801170898288	0.574970485571506	0.138105536495007	0.240195870850195	NA	NA	0.176483024637989	0.54293654340972	0.243973128497601	0.2423095703125	0.351885205991615	0.0243433604105712	NA	53.491383651949	28	12.5820368528366	28	6.83124759793282
dgrp105_07_1wf_9100_20s_180614	1	180614	dgrp105	0.684439963108706	0.543255900343259	0.521811008453369	0.143467553834757	0.274941600523128	99.6370119808879	0.4427016245255	0.793723233044147	0.764228820800781	0.146512208437377	0.191712487738761	1.300601384444	1.30868581149176	0.230274377849483	0.175958488911097	0.497670664176535	0.490898164376323	0.121911047664932	0.248342846870934	NA	NA	0.191712487738761	0.461048527117016	0.250467332700888	0.251627922058105	0.315560036891294	0.00631346162348805	NA	55.5275449140821	24	13.0381416082382	24	6.01121598482132
dgrp105_08_1wf_9100_20s_180614	1	180614	dgrp105	0.829781172486368	1.16164540818759	0.959897994995117	0.655918237170475	0.683320770113507	94.0749576468148	0.318824545362944	1.39994187227317	1.20220232009888	0.653353589247725	0.543463923105712	0.837387344566219	0.844830031067511	0.294080837638398	0.348094678010917	0.258644604415235	0.247612587721991	0.113354779666945	0.457790860754682	35.7142857142857	NA	0.543463923105712	0.2051370085966	0.238296464085579	0.242201805114746	0.170218827513632	0.00603477631611777	NA	NA	14	16.2630357146263	14	3.3361504971981
dgrp105_09_1wf_9100_20s_180614	1	180614	dgrp105	0.816040221984779	0.971561742946506	0.92264461517334	0.538545327079209	0.583697469450934	67.8384167065388	0.351394067886815	1.19058070518076	1.14621138572693	0.542016397842556	0.472876473390472	1.03730145931676	0.879511837111284	0.526854852023729	0.599030996278753	0.313096417263729	0.245096455683757	0.204774592652399	NA	37.5	NA	0.472876473390472	0.225711564828143	0.219292721327613	0.223592400550842	0.184189715466889	0.0114976999340279	0.0514225881814505	NA	16	15.5449878871441	17	3.72797626256943
dgrp105_11_1wf_9100_20s_180614	1	180614	dgrp105	0.719323953949412	0.63239590326945	0.475203514099121	0.404874128449235	0.852001545520524	90.625	0.429990508454602	0.879153126762027	0.71761417388916	0.402176953083383	0.560436189413256	1.3456117987859	1.3935064779733	0.522358621150892	0.374851950391078	0.566722790802043	0.510119669989384	0.34127401282911	0.669007750350447	19.047619047619	NA	0.560436189413256	0.391214626528264	0.247402527115562	0.242410659790039	0.281410051997153	0.0128449324111511	0.0529883150447122	51.6571101713017	21	13.2803139686584	22	5.44285559654236
dgrp105_12_1wf_9100_20s_180614	1	180614	dgrp105	0.614137951498604	0.386146756013234	0.354155540466309	0.12677333296931	0.357959479618447	92.2007443779709	0.420825291453143	0.628762243191401	0.605778694152832	0.124804308833857	0.206022942104943	1.638771803013	1.67627731946155	0.257612759705136	0.153681468283473	0.677901123110689	0.675692405663704	0.166104467007407	0.245828524362723	NA	NA	0.206022942104943	0.629830296754273	0.243206925930515	0.242307662963867	0.386802688240428	0.0132815097519358	0.0548125865665104	53.4003392529145	30	11.584402680397	31	7.53941470384598
dgrp109_01_1wf_9100_20s_040614	1	40614	dgrp109	0.525091712215032	NA	0.223657608032227	0.0533239075733124	0.238417588574179	NA	NA	NA	NA	0.0527544912927774	0.123055946374453	NA	NA	0.270097032450189	0.115753883968859	0.958658199868595	0.956549401364116	0.250315640314501	0.261686056107014	NA	NA	0.123055946374453	NA	0.208347512616052	0.205097198486328	0.474737201385339	0.00854213435197141	0.0416492005498594	NA	NA	10.1396483778954	NA	9.37563806772232
dgrp109_02_1wf_9100_20s_040614	1	40614	dgrp109	0.690109747025051	0.506856191616792	0.493938446044922	0.0866522865019532	0.175431346144034	68.75	0.386363636363636	0.734457372616117	0.717589378356934	0.0847204182958426	0.118062531095189	1.37705397674519	1.41195544011171	0.142607891119716	0.10100027739433	0.458374065007138	0.470526273549889	0.0668416757179662	0.14205726539706	NA	NA	0.118062531095189	0.44875658196696	0.227455052098742	0.223674774169922	0.309691291257046	0.0082040741967238	0.0366785849104795	42.1875	26	13.1782609820366	27	6.14128640666604
dgrp109_03_1wf_9100_20s_040614	1	40614	dgrp109	0.56614153883871	NA	0.270248413085938	0.0989996723582275	0.366328413283767	65.6993626300895	0.428722951569601	NA	0.493941307067871	0.0949445088117215	0.192218199719578	NA	NA	0.362995012601261	0.172526103894827	0.858834499201528	0.8889777432467	0.284261057902202	0.319761726389269	NA	NA	0.192218199719578	0.765816120319931	0.220107149661731	0.22366851568222	0.433560316825416	0.00614226024469687	0.027461443225311	37.532537967076	NA	10.9217754304409	NA	8.58417883680752
dgrp109_04_1wf_9100_20s_040614	1	40614	dgrp109	0.699271806278444	0.502556324005127	0.465980529785156	0.111939878924152	0.24022436940823	51.9399066831083	NA	0.718685237260965	0.708381652832031	0.106958915281536	0.150990521640314	1.42219619820077	1.41185087842132	0.209687291956051	0.148519433008758	0.449810347964619	0.458325072323806	0.107950491117488	0.235532589500626	NA	NA	0.150990521640314	0.434055980013423	0.218137577727989	0.21434497833252	0.303523109169947	0.0244152783370548	0.113906462969142	39.8360899499436	26	13.0664644241333	27	5.8897145986557
dgrp109_05_1wf_9100_20s_040614	1	40614	dgrp109	0.647225922977188	0.488342620134354	0.484620094299316	0.0952526650787143	0.196551208254034	57.8125	0.405405405405405	0.754516472220421	0.754886627197266	0.0957147150354165	0.126793496648344	1.34566213075572	1.32470223205939	0.164097015826332	0.123874642810276	0.565685484398468	0.538456316010083	0.112821525904563	0.209527723141147	NA	NA	0.126793496648344	0.54464307152202	NA	NA	0.35250711465897	0.00628561021085085	0.0232604856211522	34.375	25	12.2085655033588	26	6.91528303921223
dgrp109_06_1wf_9100_20s_040614	1	40614	dgrp109	0.78699718133254	NA	0.671012878417969	NA	NA	55.5263329118199	0.337544195692189	NA	0.913330078125	NA	NA	1.09890491753851	1.15375044871698	0.285053780328215	0.247067102461548	0.344887699546201	0.358196098495985	0.105983658936939	0.295881667561288	11.1111111111111	NA	NA	0.270297329224035	0.229088700915638	0.232987403869629	0.212723236221029	0.00675043265745324	0.0289733803001236	36.783741529363	18	15.2557801008224	19	4.35268531739712
dgrp109_07_1wf_9100_20s_040614	1	40614	dgrp109	0.680295618785097	0.482551368298354	0.484622955322266	0.0377973289642321	0.0779932699207316	71.875	0.366200880995076	0.709325997365846	0.708292007446289	0.0256813570147035	0.0362581488209874	1.41166304237675	1.41184707646984	0.0520621698037313	0.0368752187622944	0.471261360038121	0.469408383873824	0.0540184667588129	0.115077763019531	NA	NA	0.0362581488209874	0.467651418061606	0.225665831672294	0.223668098449707	0.318141210825949	0.0197703216057819	0.088391334047253	45.5543116784789	27	13.0288869440556	28	6.31864328682423
dgrp109_08_1wf_9100_20s_040614	1	40614	dgrp109	0.701340814199872	0.555307115117709	0.559166431427002	0.0188251479545703	0.0336664486573849	64.5371138376981	0.370051826691195	0.791779266049465	0.79224419593811	0.0194826191538452	0.0245916842985205	1.26373506099317	1.26234078925192	0.0308105666679375	0.024407487209691	0.426355668266034	0.423729225112411	0.017700325669955	0.041772728008693	NA	NA	0.0245916842985205	0.425589633826389	0.236332951784134	0.232992172241211	0.298483380302825	0.00557466103281623	0.0239263876515342	40.6550369726803	24	13.327370762825	25	5.90832379460335
dgrp109_09_1wf_9100_20s_040614	1	40614	dgrp109	0.742142150729173	0.59798714146018	0.596454620361328	0.0331615840495171	0.0555978324544254	NA	0.457949660044112	0.805758224179347	0.801496505737305	0.0338676072828957	0.042255464671977	1.24318378137308	1.24768685984084	0.0510000478721154	0.0408756792378347	0.347834954773328	0.354864032544136	0.020956295185644	0.0590544356817496	NA	NA	0.042255464671977	0.347273552846071	0.207665119171143	0.205046415328979	0.257726341400544	0.00493351563608866	0.0240604822482424	51.7751297680653	24	14.3516913950443	25	5.19162797927856
dgrp109_10_1wf_9100_20s_040614	1	40614	dgrp109	0.621974791405091	0.555642187595367	0.21424674987793	NA	NA	62.3038810585252	0.267432077248418	0.893351620151883	0.624317526817322	NA	NA	1.63186337539358	1.60174904122563	NA	NA	NA	NA	NA	NA	14.2857142857143	NA	NA	0.600740345901671	NA	0.251605272293091	0.373645351330814	NA	NA	45.6418247264055	21	11.6684859395027	22	7.34352695941925
dgrp109_11_1wf_9100_20s_040614	1	40614	dgrp109	0.78987598695073	NA	0.708309412002563	0.122787233225721	0.173352536539889	68.7677533895793	0.386101432892246	0.927079296537808	0.885355710983276	0.126193848429541	0.142534629713282	1.09569082875938	1.12948952335711	0.137475027115336	0.121714300374144	0.27420477905502	0.271375965305906	0.0465645942436241	0.171587023895556	NA	NA	0.142534629713282	0.266656928320833	0.195266915315931	0.204935073852539	0.210625904434668	0.0149461410913488	0.0729311035460104	42.2164252690822	21	15.3778311610222	22	4.29587213695049
dgrp129_02_1wf_9100_20s_190614	1	190614	dgrp129	0.632124576744452	0.383293532766402	0.260954856872559	0.398277970516483	1.52623321631062	78.18747501998	0.458953209608475	0.606357586570084	0.484610557556152	0.397504843460804	0.820256259924226	2.01678267532875	2.10395197277601	0.699087211002782	0.332273369377528	0.990242950074639	0.960659658840561	0.617049077163523	0.642318089955241	6.25	NA	0.820256259924226	0.580540921447386	0.222517580697031	0.214365005493164	0.366974184252763	0.0145794373388218	0.0680122079874028	42.3030824083778	32	12.2653930485249	33	7.34308016300201
dgrp129_03_1wf_9100_20s_190614	1	190614	dgrp129	0.700910680912486	0.47144610100779	0.34482479095459	0.277225404565732	0.803960190328196	80.0695498457435	0.444956654842337	0.672619370550945	0.549774765968323	0.272703041386105	0.496026842748578	1.71041422546635	1.81892669853388	0.638078181446189	0.350799282874072	0.603405740121175	0.666614986759608	0.342902551174004	0.51439370248911	NA	NA	0.496026842748578	0.426715310855504	0.201173269543154	0.204949975013733	0.299089319087514	0.00807323031099009	0.0393912236898254	44.4420707916497	29	13.6719369292259	29	5.83402481675148
dgrp129_04_1wf_9100_20s_190614	1	190614	dgrp129	0.72716374813061	0.500279364841325	0.493958473205566	0.117210594218017	0.23728835636197	92.240450894659	NA	0.687987219010081	0.671008586883545	0.109657319682761	0.163421633979466	1.49215254636998	1.49046177157362	0.254677646062862	0.170871639192715	0.409813824092758	0.359769880877948	0.17984572968249	0.499891011564423	NA	NA	0.163421633979466	0.375206069569333	0.187707854168756	0.177087783813477	0.27283625186939	0.0197552480048233	0.111556243911388	45.4201307929645	28	14.0078222155571	28	5.25581991672516
dgrp129_05_1wf_9100_20s_190614	1	190614	dgrp129	0.548678266417804	0.276396576903368	0.214350700378418	0.177234551355479	0.826843817363723	84.4328505381643	0.407813431841916	0.503749818099957	0.465978622436523	0.172573975791665	0.37034740969297	2.21941301978747	2.23549922264204	0.724184926042563	0.323947742279544	1.23018021726331	1.17779859740402	NA	0.713095105738848	NA	NA	0.37034740969297	0.842104937655844	0.2327549221615	0.214352607727051	0.462044677334881	NA	NA	50	38	10.503069922328	39	9.07744196429849
dgrp129_06_1wf_9100_20s_190614	1	190614	dgrp129	0.761879837593607	0.770583052384226	0.596456527709961	0.592952435793328	0.994125151199055	89.1857699551896	0.404075638964037	1.01142334310632	0.82012939453125	0.588929090221264	0.718092893814481	1.27990130149292	1.2193197886433	0.596448929295741	0.489165299252128	0.525734836836937	0.415044211573391	0.38851887822771	NA	26.3157894736842	NA	0.718092893814481	0.312637406680817	0.240913087129593	0.242307662963867	0.238192136627668	0.0165212506161042	0.0681829473076459	53.1479729740467	19	14.6410779953003	20	4.81826174259186
dgrp129_07_1wf_9100_20s_190614	1	190614	dgrp129	0.549792755670134	0.368917768371516	0.372796535491943	0.0799091374047408	0.2143505365448	77.5378526172951	0.43484046113151	0.671012421620303	0.680335521697998	0.0798894355654071	0.117426524145053	1.51171569871335	1.46986298393501	0.187606985448086	0.127635696319012	0.859403731807434	0.820508918404081	0.201359938364687	0.245408591970382	NA	NA	0.117426524145053	0.818518094974665	NA	NA	0.45001531900199	0.00589232899552409	0.0197564551852382	42.3030824083778	29	10.698615282774	30	9.05897606909275
dgrp129_08_1wf_9100_20s_190614	1	190614	dgrp129	0.784656668462336	0.88071671128273	0.773517608642578	0.435026261179003	0.562399945803971	92.1875	0.423479615196781	1.1224230248481	1.02515029907227	0.43865937992033	0.42789762663807	1.03212563424157	1.0837669981985	0.382992532636306	0.353390104397843	0.353308439251146	0.333149687999696	0.175768790784894	0.527597044560505	43.75	NA	0.42789762663807	0.274483038824474	0.241741799256381	0.242312908172607	0.21537494679343	0.0176564081621772	0.0728661477233394	53.1479729740467	16	14.0914673805237	17	4.10961058735847
dgrp129_09_1wf_9100_20s_190614	1	190614	dgrp129	0.847073277235483	NA	NA	0.475274999357093	0.316753535450225	95.632148425621	0.424424891243948	NA	NA	0.472687691592123	0.271226592956194	0.689169017227103	0.599472919408752	0.26613518350236	0.443948633684477	0.210994359880027	0.171057421918986	0.10445986036142	0.610671312530908	75	NA	0.271226592956194	0.18031517350789	0.245906156989244	0.242328643798828	0.152740164958613	0.00577623533460831	0.0238363704928069	55.0434842306517	12	16.3650891184807	13	3.19678004086018
dgrp129_10_1wf_9100_20s_190614	1	190614	dgrp129	0.606781515347553	0.34345639277907	0.270272195339203	0.20361279833187	0.753361987815015	68.1577535449109	0.40728129808569	0.566029755508198	0.49403989315033	0.238860009681041	0.483483242937952	1.99114551284519	2.14595092401203	0.629014616654364	0.293116962562391	0.807483455870145	0.843757595139111	0.367877120656145	0.43599858866514	NA	NA	0.483483242937952	0.647355074643392	0.222338238784245	0.205033302307129	0.392803093160046	NA	NA	40.3983752065351	34	11.6775173544884	35	7.78183835744858
dgrp129_11_1wf_9100_20s_190614	1	190614	dgrp129	0.716620601268124	0.542040302753449	0.540620803833008	0.0477276790101961	0.0882830972685593	73.851889363103	0.359666604295519	0.756383924484253	0.754909515380859	0.0473735267971921	0.062753913988343	1.32732817691488	1.32466206826853	0.0842071353634997	0.06356876774887	0.398663695053411	0.396428703724936	0.0373999916158643	NA	NA	NA	0.062753913988343	0.395439914218217	0.21434437082364	0.214348793029785	0.283380389092474	0.00256472251581825	0.0119651829131684	47.2898310950674	25	13.5510075688362	26	5.57295364141464
dgrp136_01_1wf_9100_20s_060614	1	60614	dgrp136	0.852973245463032	1.27250787386527	0.708188056945801	1.41662262257534	2.00034808364998	89.117307697495	0.455344836755344	1.4918496923951	0.913326263427734	1.4237077578714	1.55881618089925	0.972976420757902	1.09489898631293	0.39782199752383	0.363341278507797	0.275621312671981	0.283789353145209	0.133026682507268	0.46875149131899	23.0769230769231	NA	1.55881618089925	0.171043166691634	0.217653776385954	0.205032348632813	0.145895245007237	0.0295346517981874	0.144048741552877	48.5382017719033	13	16.5426023602486	14	3.04715286940336
dgrp136_02_1wf_9100_20s_060614	1	60614	dgrp136	0.630783589775556	0.440690680273942	0.447341918945313	0.112640893066102	0.25180044233653	93.7630199292344	0.39915823187389	0.698640052495258	0.680440187454224	0.112451506080403	0.165262881519572	1.46495605221523	1.47011336647683	0.216541437182378	0.147295740668847	0.630548564013063	0.63018098983823	0.17699460488359	0.280863129382918	NA	NA	0.165262881519572	0.586302277420061	0.258377949482408	0.261030197143555	0.36982985524461	0.0178389002977462	0.0683403701677307	56.3367386791248	28	12.3393390476704	29	7.49296053498983
dgrp136_03_1wf_9100_20s_060614	1	60614	dgrp136	0.833790204717705	1.15423716031588	1.02524900436401	0.458857999336737	0.447557615158454	72.0276910726007	0.327165783901457	1.38432564185216	1.25825595855713	0.463446997363388	0.368324897817161	0.779882287725311	0.794750855896381	0.192031621248178	0.241624931666905	0.220226686307115	0.227155629288457	0.0668735180888521	0.294395161142723	61.5384615384615	NA	0.368324897817161	0.198368493116668	0.228964286191123	0.223687648773193	0.165397706485289	0.0189775496569842	0.0848395061643587	48.4626950602213	13	15.0050830841064	14	3.20550000667572
dgrp136_04_1wf_9100_20s_060614	1	60614	dgrp136	0.531372551650613	0.267259203618573	0.149115562438965	0.528769287753579	NA	81.2583102298224	0.351250383749531	0.502960122400715	0.391294956207275	0.527313757716322	1.34761194682253	NA	NA	NA	0.270459194511693	NA	NA	NA	0.657343132058977	3.2258064516129	NA	1.34761194682253	NA	0.235324744135141	0.214476823806763	0.467879526933261	NA	NA	52.7162975787588	31	NA	32	7.53039181232452
dgrp136_05_1wf_9100_20s_060614	1	60614	dgrp136	0.721813364874172	0.574321590363979	0.605654716491699	0.104676101345642	0.172831315426695	88.4060866745706	0.434149546201303	0.795664943754673	0.820121765136719	0.105956891855518	0.129196536855541	1.28061245670724	1.2331814068304	0.192040584370944	0.155727765037051	0.398736444632487	0.380969552258201	0.0840477205777652	0.220615322352066	NA	NA	0.129196536855541	0.386859915760362	0.222182002067566	0.223676681518555	0.279240657529925	0.010874209166519	0.0486157479299732	50.0246242633727	24	13.7837181687355	25	5.55455005168915
dgrp136_06_1wf_9100_20s_060614	1	60614	dgrp136	0.904393868199085	NA	NA	NA	0.978295840436817	90.625	0.394339032060335	NA	NA	NA	0.881963833965373	0.518550894299552	0.638688824547506	0.241600483967934	0.378275734101189	0.148446457256773	0.174830391630167	0.0675586882260698	0.386424165707883	100	NA	0.881963833965373	0.106932591717188	0.252963559968131	0.260844230651855	0.0967091802596611	0.02221787744265	0.0851768022130564	54.8880252195322	6	14.1938143968582	7	1.77074491977692
dgrp136_07_1wf_9100_20s_060614	1	60614	dgrp136	0.749391291549881	0.792693624893824	0.680325508117676	0.387674144139837	0.569836261486732	92.240450894659	0.403260893710149	1.05778334207005	0.932076454162598	0.391730260509848	0.420276962002853	1.05531111473379	1.08370315403489	0.345300165854526	0.318629843023793	0.411604074861204	0.391853136312976	0.198815251123446	0.507371851082113	22.2222222222222	NA	0.420276962002853	0.334756217322465	0.26535911936509	0.27025032043457	0.250863394053635	0.0138592776272895	0.0512831126527559	55.0434842306517	18	14.2684852480888	19	5.04182326793671
dgrp136_08_1wf_9100_20s_060614	1	60614	dgrp136	0.715844998718654	0.9319397852971	0.903867244720459	0.985070369785957	1.08983965902051	93.7630199292344	0.449823940728514	1.30187371143928	1.2302074432373	0.924547321719561	0.751537740079514	1.2068972552557	0.81287103691105	NA	NA	NA	0.27852329696916	NA	NA	30.7692307692308	14.2857142857143	0.751537740079514	0.496467933755363	NA	0.261079788208008	0.355394087402961	NA	NA	51.5861688100599	13	12.1152172088623	14	6.47749507427216
dgrp136_09_1wf_9100_20s_060614	1	60614	dgrp136	0.666018887565434	0.495368217046444	0.493946075439453	0.0639899194805031	0.129548391337197	81.3100739453606	0.4222234847064	0.743775028448838	0.74555778503418	0.0663302664085778	0.0889673043995335	1.35529416680276	1.34144924866377	0.122271517681704	0.0911488211749344	0.510202115093737	0.490399585888093	0.081881757289945	0.166969466627221	NA	NA	0.0889673043995335	0.501011463852212	0.248185155568299	0.24242115020752	0.33368309781238	0.0130035952240221	0.053640514504987	46.9790511824153	26	12.8795736432076	27	6.70099920034409
dgrp136_10_1wf_9100_20s_060614	1	60614	dgrp136	0.667950641457006	0.435110229870369	0.400835037231445	0.0909671790017679	0.226944180404177	101.610565549307	0.476266743464819	0.651410752329333	0.615201950073242	0.0926847850767344	0.150657495584499	1.55764165386962	1.62548249380703	0.186712897617066	0.114866138717845	0.511980813303273	0.534800835581695	0.0820666701752702	0.153452771041405	NA	NA	0.150657495584499	0.497682420345694	0.216546712319056	0.21437931060791	0.332427291911781	0.00448358191063275	0.020914247265367	53.21683239352	29	12.6181966662407	30	6.49640136957169
dgrp136_11_1wf_9100_20s_060614	1	60614	dgrp136	0.665229836126863	0.482200220779136	0.493937492370605	0.050920376790453	0.103090730258328	80.0695498457435	0.355732998256612	0.724862588224588	0.736250877380371	0.0467385148708934	0.063481778163976	1.38560618842405	1.35823267682623	0.100676993125147	0.0741235245204068	0.510973044796558	0.499749598324227	0.0660519674101617	0.13217012606243	NA	NA	0.063481778163976	0.503239851390692	0.242662367445451	0.242304801940918	0.334770163873137	0.00783167731963525	0.0323215935338536	51.5861688100599	27	13.0194059610367	27	6.55188392102718
dgrp136_12_1wf_9100_20s_060614	1	60614	dgrp136	0.615348803405778	0.374554192647338	0.391430854797363	0.0770558075331178	0.196856754107972	106.35335047026	0.393182127762447	0.608685985207558	0.633621215820313	0.083102531530617	0.131154906836617	1.67389430371709	1.60177197980554	0.250862648131562	0.156615705165487	0.649491763120047	0.619064673707805	0.132661216779633	0.2142929849075	NA	NA	0.131154906836617	0.624258893107414	0.233818785710768	0.232986450195313	0.384136962889063	0.0126520046335121	0.0543036070248116	NA	32	11.9857341647148	33	7.71601992845535
dgrp138_01_1wf_9100_20s_230614	1	230614	dgrp138	0.669374389438274	0.394523317163641	0.428694725036621	0.091363697759717	0.213120648386593	81.2575113248308	0.400960925251678	0.589391114133777	0.624410629272461	0.0891517751229746	0.142777478382856	1.74279264857978	1.60151021318321	0.362455205250559	0.22632088279358	0.524187477917719	0.456516419517447	0.2143489393409	0.469531719291661	NA	NA	0.142777478382856	0.493932268366558	NA	0.195709705352783	0.330625610561726	0.00586278236775358	0.0299565233987013	48.676424400378	33	13.0192694664001	33	6.4306373000145
dgrp138_02_1wf_9100_20s_230614	1	230614	dgrp138	0.810599960513994	1.04845133423805	0.484604835510254	NA	NA	98.6357131380414	0.444656390631214	1.2934263327292	0.726921081542969	NA	NA	1.35507433263154	1.45002579019641	0.437024400619156	0.301390777718485	0.515900791083473	0.595368763768935	0.200415625945722	0.336624354756212	7.14285714285714	NA	NA	0.232892084045749	0.244176016251246	0.242316246032715	0.188782314131506	0.0150220135714612	0.0619934231295126	54.7767129467441	14	14.6783186793327	15	3.66264024376869
dgrp138_03_1wf_9100_20s_230614	1	230614	dgrp138	0.729837892528171	0.678479486703873	0.78284764289856	0.328719753592183	0.419902590975519	74.0334858780133	0.384679633300804	0.929630392789841	1.0344774723053	0.327921084970054	0.316992002000094	1.2189842443816	0.984490585346847	0.507982169165169	0.515984791247345	0.490682405463874	0.321428865104655	0.34182397362234	1.06345139074876	10	NA	0.316992002000094	0.370199889141338	0.251173030762445	0.251619338989258	0.270185906905076	0.0148165983223181	0.0588849743498877	45.5543116784789	20	13.5695897340775	21	5.27463364601135
dgrp138_04_1wf_9100_20s_230614	1	230614	dgrp138	0.791747233499056	0.894675765186548	0.997191429138184	0.266830010670214	0.267581532365175	93.7760380507729	0.404579758706201	1.13000175729394	1.23018169403076	0.266931566774118	0.216985481144254	0.937137475231828	0.879584876095312	0.252580745889859	0.287159036898321	0.292333406318764	0.25009966465774	0.116968528907914	0.467687667906251	43.75	NA	0.216985481144254	0.263487514049694	0.235735893249512	0.232992172241211	0.208615510310389	0.0059785942263532	0.0256600647517192	55.8361512037676	16	14.3148122429848	17	4.0075101852417
dgrp138_05_1wf_9100_20s_230614	1	230614	dgrp138	0.753582931375894	0.697626753931954	0.708288192749023	0.1016065155307	0.14345363451047	87.809903858836	0.438354006671699	0.925746490380594	0.913317680358887	0.143025760884955	0.156600232274879	1.10540491506748	1.09490927582509	0.173175471438532	0.158164219869296	0.353888251350354	0.295772795552822	0.24467036990495	0.827224050297263	NA	NA	0.156600232274879	0.3273113062511	0.228341124105183	0.20512056350708	0.246656213637177	0.0749776125950164	0.365529478434903	49.3180806768585	21	14.650161832571	22	5.02350473031402
dgrp138_06_1wf_9100_20s_230614	1	230614	dgrp138	0.616038766475331	0.364306778618784	0.149114608764648	0.854290040712228	NA	77.4868423961551	0.364487526374838	0.591369891708547	0.363449811935425	0.859242378598904	2.36412938012902	2.47994778124893	NA	0.913460856768693	0.331997176602954	NA	NA	NA	0.684150677942612	3.03030303030303	NA	2.36412938012902	0.621495537609008	0.226415037232287	0.205127716064453	0.382865344358576	0.089367337760743	0.435666810294241	49.2438548845836	33	12.0221236944199	34	7.69811126589775
dgrp138_07_1wf_9100_20s_230614	1	230614	dgrp138	0.79998361433089	0.924952074885368	0.866720199584961	0.562200696688796	0.648653045075	96.8875999870468	0.354116767871418	1.15621377527714	1.09037590026855	0.631486070294484	0.579145293048894	1.04784923718552	1.0218086993128	0.412855115637667	0.404043453452026	0.305000165476796	0.265026719509865	0.144600268635719	0.545606378493231	37.5	NA	0.579145293048894	0.25002560313239	0.231261700391769	0.214361190795898	0.20001638566911	0.0800678481395583	0.373518395947865	NA	16	14.7992331981659	16	3.70018720626831
dgrp138_08_1wf_9100_20s_230614	1	230614	dgrp138	0.689688530653689	0.455695953348587	0.372782707214355	0.251506892318104	0.674674247090232	79.82524859028	0.431005457607869	0.660727173346898	0.577799320220947	0.254461296626036	0.440397362407299	1.72141436258178	1.73070470144826	0.596525725445211	0.34467215865655	0.631902031645601	0.564122865998655	0.355101626995777	0.629475684108545	NA	NA	0.440397362407299	0.489469383204209	0.223049217214187	0.20503044128418	0.337581419702078	0.0988945545477571	0.482340836455039	45.4201307929645	29	13.215182647109	30	6.69147651642561
dgrp138_09_1wf_9100_20s_230614	1	230614	dgrp138	0.545233919542458	0.264354886078253	0.270175457000732	0.0230819214889134	0.0854330802107269	78.3746012749028	0.341799920243053	0.484846735691152	0.484691619873047	0.0231536948233906	0.0477699507770635	2.06765849256589	2.06316750485995	0.108318433871235	0.0525010371751604	0.834333411081862	0.827702774229518	0.061074196619105	0.0737875944368521	NA	NA	0.0477699507770635	0.834075181601259	0.220491849612899	0.223669767379761	0.454766080457542	0.00770365837613775	0.0344421084100204	51.5861688100599	41	10.8385503292084	41	9.04016583412886
dgrp138_10_1wf_9100_20s_230614	1	230614	dgrp138	0.583774195673038	0.786158319030489	0.643060207366943	0.634297206514561	0.986372969821498	71.8919816895459	0.30387694986438	1.34668220153877	1.19291400909424	0.836939030355134	0.70159208792477	1.00496159052452	0.838292102637571	0.556756692169463	NA	NA	0.534579874640014	NA	NA	21.4285714285714	20	0.70159208792477	0.689167474318269	NA	0.279618263244629	0.402318188004166	NA	NA	50.0456655740208	14	11.0062164664268	15	8.12692114710808
dgrp138_11_1wf_9100_20s_230614	1	230614	dgrp138	0.603633051781388	0.379093771980655	0.382094740867615	0.015526797286211	0.0406359879514558	NA	NA	0.628020236569066	0.624433517456055	0.0156980923946969	0.0251397337840721	1.59324602669281	1.60145151092146	0.0395306573354975	0.0246842674073547	0.657793415013843	0.658534333007208	0.0318919751479926	0.0484287204926087	NA	NA	0.0251397337840721	0.656635595166449	0.248926464588411	0.251621246337891	0.396366948218612	0.00502213986553555	0.0199591248299897	NA	31	11.7519069314003	31	7.71672040224075
dgrp138_12_1wf_9100_20s_230614	1	230614	dgrp138	0.877800560366144	1.64024077653885	0.745565414428711	NA	3.54698417950119	75.0162742759863	0.352964376858675	1.86858023405075	0.978556632995605	NA	NA	0.933371270949123	1.1537698085222	0.418003955441687	0.362294066246268	0.278836784854191	0.347827634482595	0.131798846933582	0.378919999066885	30	NA	NA	0.139210938282934	0.228339457511902	0.232978105545044	0.122199439633856	0.00882597829362126	0.0378832949687405	48.5382017719033	10	16.4024077653885	10	2.28339457511902
dgrp142_02_1wf_9100_20s_050614	1	50614	dgrp142	0.677214335622501	0.512595187062802	0.493862152099609	0.303697630182544	0.61494412740762	71.7049619098985	0.411651594585448	0.756917212320411	0.745572090148926	0.307241383116161	0.412088096075043	1.56303385951802	1.34125192347296	NA	0.526982955561292	0.753731275101895	0.490622803426462	NA	NA	8.69565217391304	NA	0.412088096075043	0.47724000149634	0.244630927840869	0.242324829101563	0.323193770545825	0.00970781990768382	0.0400611854083475	42.1875	23	11.7896893024445	24	5.87114226818085
dgrp142_04_1wf_9100_20s_050614	1	50614	dgrp142	0.733437278527515	0.605376605106437	0.559183597564697	0.252911137027035	0.452286401333103	64.1386742242931	0.386598722208342	0.825396557864935	0.773538589477539	0.254254897610409	0.328690644615594	1.31803052951008	1.292760327155	0.38436104204784	0.297318098315803	0.447065862080432	0.416652099057469	0.207297941113248	0.497532453531828	8.69565217391304	NA	0.328690644615594	0.364336083548674	0.220560541376472	0.223758697509766	0.267217665587313	NA	NA	39.3427447250443	23	13.923661917448	24	5.29345299303532
dgrp142_05_1wf_9100_20s_050614	1	50614	dgrp142	0.807638645199409	NA	0.80148983001709	NA	0.797866178853267	76.9600647251547	0.370287755951158	NA	1.02516412734985	NA	0.625371003943338	0.952252251356059	0.97545356233357	0.240927336576811	0.246990062756491	0.2830499451296	0.29069714174206	0.0837572313330334	0.288125403748732	NA	NA	0.625371003943338	0.238460610092813	0.228906160220504	0.232982635498047	0.192590004068784	0.00699325152759534	0.0300161920335645	48.4626950602213	15	14.3989919424057	16	3.66249856352806
dgrp142_06_1wf_9100_20s_050614	1	50614	dgrp142	0.685737041589358	0.432446058591207	0.447360992431641	0.0564410596521828	0.126164463614488	NA	NA	0.630629574259122	0.652366638183594	0.0565350357511015	0.0866614453315914	1.59907452722588	1.55498939688283	0.168057142728226	0.108076069885182	0.470881320150844	0.437478015992633	0.113200391969147	0.258756755381861	NA	NA	0.0866614453315914	0.458100228896336	0.19810363842595	0.195707321166992	0.314136295714781	0.0129644572754214	0.0662441098172263	NA	30	12.9733817577362	31	6.14121279120445
dgrp142_07_1wf_9100_20s_050614	1	50614	dgrp142	0.77906755636096	0.785294651985168	0.782845020294189	0.179261357224854	0.22898703137626	68.3403991519657	0.312192662432184	1.00799301109816	1.00652074813843	0.179969436977908	0.17880350435971	1.03268502464288	0.993521496550878	0.246363564100813	0.2479700388528	0.305549958984308	0.28572585876613	0.107705958377681	0.376955585479017	10.5263157894737	NA	0.17880350435971	0.283054294713541	0.222281023859978	0.223674774169922	0.220518417699954	0.00623976796581514	0.0278966101071142	47.0050279890354	19	14.9205983877182	20	4.44562047719955
dgrp142_08_1wf_9100_20s_050614	1	50614	dgrp142	0.708088801268677	0.586749659932178	0.577951908111572	0.0320186237679602	0.0554001523631601	62.6755347504112	0.326890465825292	0.828638525112816	0.810956478118896	0.034908715999778	0.0430463495165025	1.20837612181586	1.23311179697289	0.0499887435531665	0.0405386954174646	0.411983967323792	0.409876369236499	0.0235944297207487	0.0575647475474115	NA	NA	0.0430463495165025	0.412282663240968	0.241906712452571	0.242294311523438	0.291932736798155	0.00685326404077372	0.0282848738696484	42.1875	23	13.4952421784401	24	5.80576109886169
dgrp142_09_1wf_9100_20s_050614	1	50614	dgrp142	0.777887454325216	0.797858781284756	0.810829162597656	0.147755625766521	0.182227813924644	67.8384167065388	0.351394067886815	1.02567380004459	1.0717670917511	0.154767128422801	0.144403695181512	0.995920270047592	0.975451293763053	0.147983533414272	0.151707762715028	0.296398770607922	0.298712499966776	0.0672211689358715	0.225036344121348	NA	NA	0.144403695181512	0.284644003722395	0.227105717909964	0.214424133300781	0.221420999444551	0.0223761671450582	0.104354704858106	44.0003995010273	18	14.3614580631256	19	4.31500864028931
dgrp142_10_1wf_9100_20s_050614	1	50614	dgrp142	0.712155594780255	0.556186641454697	0.549770355224609	0.0436040388404024	0.0793131867260976	NA	0.434256902070549	0.780990341901779	0.773427963256836	0.0425157149739873	0.054970491104249	1.28393390532972	1.29294523537666	0.0662818444687925	0.0512642319684045	0.407190253892817	0.409922596607166	0.043796474333525	0.106840839456078	NA	NA	0.054970491104249	0.403463816676408	0.224401185145745	0.22366189956665	0.287329014337499	0.0109519912075182	0.0489667271392128	48.9389367605182	25	13.9046660363674	26	5.83443081378937
dgrp142_11_1wf_9100_20s_050614	1	50614	dgrp142	0.765222680268747	0.599945858120918	0.605685234069824	0.0399284759159119	0.0659228154657455	73.4375	0.296584031709934	0.784014736612638	0.79216194152832	0.0380056981067318	0.0479771825864384	1.27839898510979	1.27736481136328	0.0616386861797921	0.0482545672398849	0.306407096177775	0.301586450765125	0.0280013895183468	0.0928469745484495	NA	NA	0.0479771825864384	0.306342302365139	0.183788795471191	0.177167415618896	0.234420077695551	0.0117377078763806	0.0662520691820073	51.6571101713017	24	14.398700594902	25	4.59471988677979
dgrp142_12_1wf_9100_20s_050614	1	50614	dgrp142	0.704627504486989	0.486678728350887	0.475310325622559	0.0394049001348131	0.082903522205626	57.3248010245129	0.280395518904668	0.69068937169181	0.680344581604004	0.0400178435074894	0.0588199635736672	1.45200940681343	1.46984341029419	0.0770928955615046	0.052449733775433	0.421307909460353	0.423285630214556	0.02811622180773	0.0664237569167617	NA	NA	0.0588199635736672	0.418579954319194	0.203713959881238	0.205033302307129	0.294942948640212	0.00352273726318127	0.0171812931047874	41.2511836951378	27	13.1403256654739	28	5.70399087667465
dgrp149_01_1wf_9100_20s_050614	1	50614	dgrp149	0.418591355724844	0.220305113328828	0.195735454559326	0.0963416156649601	0.492203192732054	NA	NA	0.526301153418091	0.465982437133789	0.181608975403967	0.389733519831832	2.07604549050023	2.14603876302163	0.590497744148793	0.275157072800199	1.59698230507612	1.23795150638144	NA	0.80517869999294	NA	NA	0.389733519831832	1.43260149801241	NA	0.223693370819092	0.599674603266457	0.170687065712635	0.763040339942283	NA	36	7.9309840798378	37	11.6775491088629
dgrp149_02_1wf_9100_20s_050614	1	50614	dgrp149	0.673116504653309	0.393691662586097	0.363467216491699	0.0920721884415787	0.253316349491678	82.9450589999187	0.245547872443176	0.584878932345997	0.559167861938477	0.094835216027363	0.169600619925824	1.75101545739966	1.78837173605308	0.269779553429143	0.150852056085691	0.509195395738243	0.512833194707193	0.0999646250816472	0.194926198446891	NA	NA	0.169600619925824	0.487358188924725	0.191868855672724	0.186398029327393	0.328048840643178	0.00903563982938743	0.0484749750949195	62.578076232815	33	12.9918248653412	34	6.52354109287262
dgrp149_03_1wf_9100_20s_050614	1	50614	dgrp149	0.827739127790759	NA	NA	0.481861525477865	0.517045697844991	93.75	0.363167560848573	NA	NA	0.4842557924762	0.419036326663402	0.865838000758388	NA	0.246914386627249	0.285344525907892	0.238542729765382	0.234043175670449	0.0782881966366344	0.334503223229505	40	NA	0.419036326663402	0.208110099457308	0.219941373666128	0.223670959472656	0.172260872209241	0.00761599359348079	0.0340499884805647	59.7030411704462	15	15.8527655005455	15	3.29912060499191
dgrp149_04_1wf_9100_20s_050614	1	50614	dgrp149	0.571767649312233	0.282151174545288	0.251613616943359	0.114332269618095	0.454396192889006	78.18747501998	0.38017316650989	0.493471736088395	0.456662178039551	0.118361880592109	0.259189147435499	2.12370169112833	2.18980711881114	0.4398458220255	0.200860531618098	0.857065184525013	0.851980017889901	0.290645293387149	0.341140974300067	NA	NA	0.259189147435499	0.749224538975554	0.211394583670104	0.214336395263672	0.428382353457093	0.00600265297104668	0.0280057568555371	48.4626950602213	40	11.2860469818115	41	8.66717793047428
dgrp149_05_1wf_9100_20s_050614	1	50614	dgrp149	0.868839989946968	NA	0.382095336914063	NA	NA	81.6247367913061	0.42445080953181	NA	0.593818664550781	NA	NA	1.54228100054946	1.72905089653489	0.534848032624128	0.309330415718815	0.520924692166984	0.588663110570827	0.214335161474395	0.364104965345212	8.33333333333333	NA	NA	0.150959913874404	0.21412218362093	0.21434211730957	0.131160010053032	0.000756369369231762	0.00352879489446935	46.9790511824153	12	17.0208510160446	12	2.56946620345116
dgrp149_06_1wf_9100_20s_050614	1	50614	dgrp149	0.365553971043332	0.122414938474106	0.121158599853516	0.0144572306342417	0.119324840760135	81.4900300650331	0.4234994005411	0.334875143401451	0.326052665710449	0.105523993922594	0.323640948288718	NA	NA	0.32282602962449	0.105258287519786	NA	NA	0.199045610629452	0.123203563253174	NA	1.66666666666667	0.323640948288718	NA	0.212181308089445	0.195737838745117	0.633613190678295	0.108397359327228	0.55378847555571	46.9790511824153	59	7.22248136997223	60	12.7308784853667
dgrp149_07_1wf_9100_20s_050614	1	50614	dgrp149	0.728285027813137	0.451247799781061	0.391526222229004	0.213819163609283	0.546117096300692	75.5836663902989	0.234002521706411	0.619603290673225	0.559255123138428	0.214398768996431	0.383364872534861	1.77306930702599	1.78809269441861	0.506080720318565	0.283028235559743	0.446979553785305	0.428620158665185	0.185965218459319	0.433869510567245	NA	NA	0.383364872534861	0.374989432187695	0.169213156215847	0.167754888534546	0.273099189050448	0.0110635828996143	0.0659508822441019	57.8968978551528	31	13.9886817932129	32	5.41482099890709
dgrp149_08_1wf_9100_20s_050614	1	50614	dgrp149	0.635731977304752	0.314469961019663	0.288904190063477	0.119543603534404	0.413782865205722	NA	NA	0.494658082723618	0.465980052947998	0.121217527367887	0.260134584304652	2.13566813354817	2.14601460657716	0.493093115666805	0.229771556146711	0.662211710178509	0.633313322975699	0.266239994424392	0.420392220983811	NA	NA	0.260134584304652	0.574224297417403	0.180576292425394	0.177158832550049	0.365052748013598	0.00762292536698612	0.0430287627055376	NA	39	12.2643284797668	40	7.22305169701576
dgrp149_09_1wf_9100_20s_050614	1	50614	dgrp149	0.656108819965251	0.462315574288368	0.428698062896729	0.149847480739107	0.349540839365081	83.1801978387885	0.319595786210465	0.704632463731936	0.63373327255249	0.212468511605059	0.33526488320441	1.51961752952581	1.60150409816348	0.385306739507481	0.24059054232164	0.582722759513242	0.523926564274538	0.252953846231056	0.48280401010266	NA	NA	0.33526488320441	0.524137413749387	0.242316889443568	0.205105781555176	0.343891180034749	0.0880244024240889	0.429165876050204	56.5961571133589	28	12.9448360800743	28	6.7848729044199
dgrp149_10_1wf_9100_20s_050614	1	50614	dgrp149	0.608534164110974	0.316333906518088	0.251625061035156	0.184333166545326	0.732570777278704	96.875	0.322388660077419	0.519829329517153	0.484622001647949	0.172338966622875	0.355615234217264	2.09577220695939	2.18918535220677	0.577042373221914	0.263587718892891	0.87825043062188	0.839978715130677	0.698112192319503	0.831107002766013	NA	NA	0.355615234217264	0.641831809860757	0.203033163740828	0.195722579956055	0.390576583913449	0.0367434750921393	0.187732427706549	65.643598555	36	11.3880206346512	37	7.51222705841064
dgrp149_11_1wf_9100_20s_050614	1	50614	dgrp149	0.725015810273848	0.707671038309733	0.596468925476074	NA	NA	89.4863816454772	0.278805191907546	0.976076698303223	NA	NA	NA	1.5521772630068	1.11771088934985	NA	NA	0.94462720639532	0.486092457337932	NA	NA	33.3333333333333	NA	NA	0.379280266484516	NA	0.242300033569336	0.274984189726152	0.152795957110565	0.630606421549841	64.5371138376981	15	10.615065574646	15	4.02608489990234
dgrp149_12_1wf_9100_20s_050614	1	50614	dgrp149	0.496010036259767	0.217469491561254	0.223643660545349	0.0262766245584014	0.117493268060121	92.8340673594559	0.371588630069158	0.438437684045898	0.438035488128662	0.0270063926246097	0.0616534352958115	2.28989393140876	2.28292005351465	0.147799010413646	0.0647412116714747	1.02915431899097	1.00000889822214	0.129703742229764	0.129702588107324	NA	NA	0.0616534352958115	1.01608823793293	0.220968192484644	0.223667144775391	0.503989963740233	0.00500362232872217	0.022370841876427	58.3379834456077	45	9.78612712025642	45	9.94356866180897
dgrp153_01_1wf_9100_20s_250614	1	250614	dgrp153	0.717044221533828	0.590403413772583	0.354154586791992	0.566545187724454	NA	79.7487509698428	0.372724870338584	0.823384940624237	0.587128639221191	0.568268048971934	NA	1.58991030959272	1.7306261491284	0.686206095572735	0.396507412024447	0.664036081649163	0.675697651906961	0.388200155463869	0.574517544005498	15	NA	NA	0.394618060909818	0.232983850297474	0.232994079589844	0.282958600288269	0.0114974688755766	0.049346613853092	50.0244081049441	20	11.8080682754517	21	4.89266085624695
dgrp153_02_1wf_9100_20s_250614	1	250614	dgrp153	0.702698326796638	0.500820053251166	0.447360038757324	0.126307010836837	0.282338608490137	73.7029775941922	0.448393561566448	0.712709898619275	0.65248966217041	0.130246757566094	0.199615051574683	1.43424019111454	1.53259133129198	0.217762400436698	0.142087715094359	0.440436821608813	0.467691889097489	0.0822934795220866	0.175956610410519	NA	NA	0.199615051574683	0.423316995430886	0.21200564019382	0.214341163635254	0.297464144393864	0.0046696217477953	0.0217859307498285	40.6550369726803	19	9.51558101177216	20	4.2401128038764
dgrp153_03_1wf_9100_20s_250614	1	250614	dgrp153	0.681107365277542	0.444772089349812	0.42884373664856	0.0857735590437748	0.200011220203659	78.1406234378124	0.418738566513848	0.6530131841528	0.643054962158203	0.0846982720770647	0.131712337298203	1.55254453255677	1.55507702894295	0.167544186293026	0.107740120376489	0.48151457263207	0.488936543744428	0.0696943619237601	0.142542754914613	NA	NA	0.131712337298203	0.468655833888269	0.208445034424464	0.205043792724609	0.319204940241588	0.005627641156559	0.0274460449730238	45.4201307929645	29	12.8983905911446	30	6.25335103273392
dgrp153_04_1wf_9100_20s_250614	1	250614	dgrp153	0.591808308007606	0.381481838226318	0.307524442672729	0.280405195386618	0.911814335633242	81.2650226496615	0.327047501902988	0.644603722294172	0.577716827392578	0.277036772426123	0.479537308401556	1.79684048375228	1.75903252674215	0.640891212881108	0.364343014206839	1.07667566140126	0.871228706244407	NA	0.863732991760187	3.33333333333333	NA	0.479537308401556	0.689552685835289	0.263051826146341	0.251635551452637	0.408083008286283	NA	NA	54.6875	30	11.4444551467896	31	8.15460661053658
dgrp153_05_1wf_9100_20s_250614	1	250614	dgrp153	0.803984785404606	1.13198912143707	NA	0.589474184009906	0.632432444405716	70.3819101847201	NA	1.40797331241461	NA	0.569342500472279	0.445915223495982	0.822141801183823	NA	0.308547200340779	0.393951642149583	0.306958013626301	0.269948053462881	0.150895192276151	0.5589786269635	NA	NA	0.445915223495982	0.243444388896153	0.275576399905341	0.270275115966797	0.195725584764629	0.029682041654784	0.109821585123028	56.2716972042785	13	14.7158585786819	14	3.85806959867477
dgrp153_06_1wf_9100_20s_250614	1	250614	dgrp153	0.697712792761313	0.656091684103012	0.643054962158203	0.202876461803008	0.31548852546308	82.8272392543661	0.490656692414432	0.940346358716488	0.931944847106934	0.207937863841604	0.223122499670568	1.10958874646617	1.14135069091067	0.221398990930196	0.19397981066936	0.466227569168588	0.468834805358459	0.125499689654338	0.267684242338586	5	NA	0.223122499670568	0.432238204358274	0.283587891431082	0.279680252075195	0.301578124700946	0.00882613578740145	0.0315579513459121	42.1875	20	13.1218336820602	21	5.95534572005272
dgrp153_07_1wf_9100_20s_250614	1	250614	dgrp153	0.749740728841706	0.752294838428497	0.726831555366516	0.239332636954991	0.329282122092654	84.3894663524424	0.388713176658606	1.00340665711297	NA	0.245551485576223	0.253347798639363	1.05759324536513	1.07299961728873	0.257266667143354	0.239763987794721	0.374053342706822	0.378188510095249	0.128492585823373	0.339758037046158	22.2222222222222	NA	0.253347798639363	0.333831660778226	0.251139835307473	0.251591920852661	0.250287192662304	0.010240698181172	0.0407036050540321	51.5861688100599	18	13.541307091713	19	4.77165687084198
dgrp153_08_1wf_9100_20s_250614	1	250614	dgrp153	0.559565862226131	0.272608332335949	0.261048793792725	0.0443606760147231	0.169932507138669	65.643598555	0.400661365447833	0.487178276479244	0.475408554077148	0.0462977242561387	0.0973851308713002	2.06832203542232	2.10393508671958	0.175165677391337	0.0832562175976883	0.803367961013645	0.81439454235361	0.109896102895272	0.134942091553893	NA	NA	0.0973851308713002	0.787099727674024	0.214569944143295	0.214347839355469	0.440434137773869	0.00704975147538312	0.0328893050500593	39.3427447250443	40	10.904333293438	40	8.58279776573181
dgrp153_09_1wf_9100_20s_250614	1	250614	dgrp153	0.563197225965993	0.3640909075737	0.354146957397461	0.0330683175135006	0.0933745633635019	76.6103167008204	0.299097325537832	0.646471414963404	0.643054485321045	0.0319544715838591	0.0496917015793862	1.5504071408155	1.55511854231366	0.0725697275888773	0.0466650776865603	0.78107956767751	0.789457385216103	0.0660283294715568	0.083637610728643	NA	NA	0.0496917015793862	0.775576927398398	0.282380507389704	0.279589653015137	0.436802774034007	0.00512575254757077	0.0183331267530607	53.6963758669987	30	10.922727227211	30	8.47141522169113
dgrp153_10_1wf_9100_20s_250614	1	250614	dgrp153	0.53036750067159	0.315382705580804	0.316890716552734	0.0536713310220786	0.169368581086682	NA	NA	0.594649380253207	0.577735900878906	0.0728929032687639	0.126169938821306	1.70373326096105	1.73089468471443	0.189408535602414	0.109428110950415	0.911863450307647	0.857193240726392	0.226498941543656	0.264233233280887	NA	NA	0.126169938821306	0.906755644041604	0.285975048318505	0.27036726474762	0.480913724650204	NA	NA	NA	31	9.77686387300491	32	9.15120154619217
dgrp153_11_1wf_9100_20s_250614	1	250614	dgrp153	0.773558593212605	0.746514102816582	0.419488906860352	NA	NA	88.305444693405	0.501724954176994	0.965038859844208	0.624416351318359	NA	NA	1.59794043410326	1.75874781535241	NA	0.440651025176742	0.638292220824525	0.639225456907371	0.465232237964552	0.72780618002197	20	NA	NA	0.292483817758247	0.218343294802166	0.214417934417725	0.226253370602521	0.0126463508202759	0.0589799116133569	44.0003995010273	20	14.9302820563316	21	4.58520919084549
dgrp153_12_1wf_9100_20s_250614	1	250614	dgrp153	0.586865198981696	0.330572934711681	0.326175212860107	0.0332993408240356	0.102090347491602	79.82524859028	0.411476293377484	0.563285973142175	0.55909252166748	0.0319328397899401	0.0571154836675352	1.78067314907888	1.78867069692545	0.0961135390706683	0.0537346193661461	0.710633153763165	0.727306556848347	0.072983104530349	0.100347101016947	NA	NA	0.0571154836675352	0.703992944507704	0.232721013682229	0.232990264892578	0.413148959460224	0.00788003393859508	0.0338213012557766	46.9790511824153	34	11.2394797801971	35	8.14523547887802
dgrp158_01_1wf_9100_20s_230614	1	230614	dgrp158	0.747725175914632	0.603065229952335	0.643045425415039	0.181979687355447	0.282996628485449	NA	NA	0.806533268342415	0.848081588745117	0.183324931255287	0.216164262599484	1.32262965786825	1.1791424426777	0.41831473086223	0.354761830057006	0.391606515476055	0.328122901383408	0.216786669329519	0.660687408332423	NA	NA	0.216164262599484	0.336875396711314	0.203157838582993	0.20503044128418	0.251890215267278	0.00768851296830313	0.0374993728743264	NA	24	14.473565518856	25	5.07894596457481
dgrp158_02_1wf_9100_20s_230614	1	230614	dgrp158	0.749748713417186	0.663465772356306	0.559174537658691	0.370049587546146	0.661778322553049	74.7717882125337	0.385403174721898	0.884917520341419	0.773512840270996	0.381587325498737	0.493317377078123	1.27991806813207	1.29280336141499	0.39294906570298	0.303951147893746	0.403622532967172	0.383356329209994	0.150197087424036	0.391794985447499	14.2857142857143	NA	0.493317377078123	0.335848848837544	0.222824215888977	0.214352607727051	0.251802242318591	0.0168617334350631	0.0786635330162823	45.9545036557898	21	13.9327812194824	22	4.9021327495575
dgrp158_03_1wf_9100_20s_230614	1	230614	dgrp158	0.894826089987867	NA	0.987876892089844	NA	NA	62.6755347504112	0.374759213567072	NA	1.2300968170166	NA	NA	1.23035781626621	0.812944140791565	0.947081476586057	NA	0.404485450785547	0.245192419082042	0.340415661326166	NA	44.4444444444444	NA	NA	0.117535587293346	0.218469805187649	0.232897758483887	0.105173910012133	0.0255721757328082	0.109800007948885	39.1873006374514	9	16.7287907600403	9	1.96622824668884
dgrp158_04_1wf_9100_20s_230614	1	230614	dgrp158	0.679084247142584	0.442379852135976	0.354166030883789	0.27557265863484	0.778088903521247	80.5778729923975	0.463335805031563	0.651435891787211	0.559282302856445	0.282907317310702	0.505839923533783	1.74574515733606	1.81896337877666	0.562664364946297	0.30933243159888	0.612213477624962	0.578851280394216	0.306262338263217	0.529086396862839	6.66666666666667	NA	0.505839923533783	0.472571340312706	0.209056039651235	0.205038070678711	0.320915752857416	0.0121352967376879	0.0591855780612744	43.243259341734	30	13.2713955640793	30	6.27168118953705
dgrp158_05_1wf_9100_20s_230614	1	230614	dgrp158	0.489319967179382	0.284761347152569	0.242307186126709	0.107659341480866	0.444309321575661	NA	0.432863729947368	0.581953254010942	0.531314373016357	0.112525281722774	0.211786632241755	1.75765339240417	1.88212487895413	0.263303037106471	NA	1.12862011576106	1.23204511266352	0.280194312563178	0.227422120897371	NA	NA	0.211786632241755	1.04611931654797	0.297894345862525	0.298227310180664	0.511887069638971	0.0068294535650354	0.0229001614939227	54.7767129467441	27	7.68855637311935	28	8.3410416841507
dgrp158_06_1wf_9100_20s_230614	1	230614	dgrp158	0.762476103261423	0.663900119917733	0.484623193740845	0.460136822859214	0.949473382211408	NA	NA	0.870715970084781	0.69896936416626	0.456381730419473	0.652935241251741	1.34807540026789	1.43067786839673	0.475527940286078	0.332379462065051	0.406754266956714	0.4151188563838	0.182320965559987	0.439201840042221	14.2857142857143	NA	0.652935241251741	0.312033503344294	0.207159080288627	0.205044746398926	0.237918089716967	0.0110659062592406	0.0539682506066811	56.4456212056808	21	13.9419025182724	22	4.55749976634979
dgrp158_07_1wf_9100_20s_230614	1	230614	dgrp158	0.837547050847969	1.31914289431138	1.2301812171936	0.695430555985407	0.565307408588048	76.9442015765321	0.342293895734859	1.57500750910152	NA	0.685984555054577	0.465897114225566	0.747176105892374	0.679165603354582	0.291189366061688	0.428745750113706	0.244605515065059	0.196980708770224	0.12038154593077	0.611133682492704	54.5454545454545	NA	0.465897114225566	0.193696999637405	0.255514020721118	0.242384850978851	0.162230350804409	0.0302514320518304	0.124807437138346	50.6066710646926	11	14.5105718374252	12	3.06616824865341
dgrp158_08_1wf_9100_20s_230614	1	230614	dgrp158	0.734531978265745	0.482610191617693	0.46597957611084	0.064519159414551	0.138459200192938	73.7029775941922	0.487241432724321	0.657030879386834	0.64305305480957	0.0640372575784379	0.0995831636277686	1.53396923193106	1.60149309124565	0.143403909900664	NA	0.366307143324196	0.37267179226524	0.0400632716346813	0.107502828135077	NA	NA	0.0995831636277686	0.361777434360114	0.174597476919492	0.177072048187256	0.26573709455244	0.004810739212712	0.0271682586944755	37.7918331951495	14	6.75654268264771	15	2.61896215379238
dgrp158_09_1wf_9100_20s_230614	1	230614	dgrp158	0.627312886941554	0.616134835614098	0.493934631347656	0.395991385490973	0.801708081108923	NA	NA	0.982181058989631	0.85738468170166	0.378499978711791	0.441458760332151	1.12208058450433	1.29278821940423	0.344688819343903	0.266624350508663	0.790523098279978	0.951150300241091	0.388655019916766	0.408615777988245	16.6666666666667	NA	0.441458760332151	0.593084215840206	0.365419845832022	0.363480567932129	0.372049371638187	0.023801608201184	0.0654824777472791	NA	18	11.0904270410538	19	6.94297707080841
dgrp158_10_1wf_9100_20s_230614	1	230614	dgrp158	0.942531616443552	NA	NA	NA	0.404353053781284	78.2654986648012	0.378221735308794	NA	NA	NA	0.388909867788389	NA	0.331176734728265	0.12879790011776	0.388909867788389	0.0757643464676061	0.105082451650993	0.0414620619734265	0.394566945498504	100	NA	0.388909867788389	0.0623294252639159	0.28579576810201	0.288902282714844	0.0587474539459962	0.0120460699226731	0.0416960011858508	48.663785944992	2	9.17049264907837	3	0.85738730430603
dgrp158_11_1wf_9100_20s_230614	1	230614	dgrp158	0.523074547416786	0.393301913738251	0.316866397857666	0.326147849047099	1.02929137091274	71.7049619098985	0.297271631073693	0.75190413236618	0.643071174621582	0.348631302534812	0.542134862039128	1.56188695576556	1.55503782390566	0.577263261679378	0.371221363754043	NA	0.939667980805916	NA	NA	4	NA	0.542134862039128	0.908603472581859	0.357355484595666	0.32618522644043	0.475267350202076	NA	NA	50.3891109268659	25	9.83254784345627	26	9.2912425994873
dgrp158_12_1wf_9100_20s_230614	1	230614	dgrp158	0.627314905414059	0.34242711024625	0.270256042480469	0.314598883102801	1.16407714778676	69.0335063574204	0.385122963112296	0.545861587682554	0.465957641601563	0.31665096864868	0.679570287892061	2.16414992604434	2.14611782427874	0.685918428297042	0.31960893318034	0.894861142400346	0.758505957610464	0.48271247395278	0.636399054100351	5.71428571428571	NA	0.679570287892061	0.594224866294235	0.203478703801599	0.205025672912598	0.37276611579405	0.00931123777554256	0.0454149845883542	42.4471178350191	35	11.9849488586187	36	7.32523333685756
dgrp161_01_1wf_9100_20s_060614	1	60614	dgrp161	0.693297913020121	0.366319757368829	0.354145050048828	0.0956946325042694	0.270213101922716	112.032448564021	0.296409298305754	0.528372796873252	0.512572288513184	0.0971112537258213	0.189458649837492	1.97014931723877	1.9870043981907	0.464282581253684	0.233659563952875	0.488770226211701	0.459511784977404	0.217921375493469	0.474245454889008	NA	NA	0.189458649837492	0.442802641443503	0.162207356175861	0.158445358276367	0.306994147192578	0.0070079532809565	0.0442294640700861	78.824989097684	36	13.1875112652779	37	6.00167217850685
dgrp161_03_1wf_9100_20s_060614	1	60614	dgrp161	0.746844666968738	0.620919479678074	0.400732278823853	0.474095268831314	1.18307232505148	81.2650226496615	0.286258459201793	0.831390390987508	0.615097284317017	0.471470708308995	0.766497788772552	1.45709480767213	1.65078215584238	0.569070346621571	0.344727706564759	0.490746998716092	0.512833060019679	0.223396561641479	0.435612637049778	25	NA	0.766497788772552	0.338966513691204	0.210470911309433	0.205033302307129	0.253155333031262	0.0208615006184849	0.101746888840699	58.0022224789706	24	14.9020675122738	24	5.0513018714264
dgrp161_04_1wf_9100_20s_060614	1	60614	dgrp161	0.691039233299748	0.4585899381802	0.456653594970703	0.0320155089745092	0.0701089607683111	95.3637157479196	0.242398698823963	0.6636235919492	0.661559104919434	0.0324950048856324	0.0491188234641404	1.51037651132397	1.51158073793238	0.0717929575312358	0.0474952847238833	0.449141052431109	0.44898104089724	0.0300055443250824	0.0668303148505327	NA	NA	0.0491188234641404	0.447096577277324	0.205033991734187	0.205033302307129	0.308961275972663	0.0024063263569928	0.0117362707907238	72.2476751356056	29	13.2991082072258	30	6.1510197520256
dgrp161_05_1wf_9100_20s_060614	1	60614	dgrp161	0.707360874910767	0.396483444316047	0.391415596008301	0.103292179604422	0.263893878163791	94.0749576468148	0.235981585345592	0.560510848675455	0.549860954284668	0.10467654375516	0.190369115936476	1.84174640410539	1.81864158967413	0.31776635341926	0.174727310330673	0.443232421800877	0.41025324821211	0.132192143013741	0.322220832107574	NA	NA	0.190369115936476	0.413320356945408	0.163874678727653	0.158433437347412	0.292366649307334	0.0173563880475331	0.109550031471413	71.875	35	13.8769205510616	36	5.89948843419552
dgrp161_06_1wf_9100_20s_060614	1	60614	dgrp161	0.761713310857754	0.638592595639436	0.232990264892578	NA	NA	117.28121252997	0.279465941767162	0.838363445323447	0.4380042552948	NA	NA	1.96223016346909	2.28308284203072	0.944684353220895	0.413775766621168	0.749270053085779	0.840005239288112	0.455203883601568	0.54190600523795	21.7391304347826	NA	NA	0.312829887236597	0.19977084968401	0.195724964141846	0.238286689142246	0.00824073622030272	0.0421036542601203	84.5051080186873	23	14.687629699707	23	4.59472954273224
dgrp161_07_1wf_9100_20s_060614	1	60614	dgrp161	0.686344347980676	0.422996019163439	0.410069465637207	0.0984427783716935	0.240063663893441	103.420504646081	0.270881500161554	0.616302910350984	0.605674743652344	0.0940355077718502	0.155257436037033	1.65793676196031	1.65105117966418	0.236233395771792	0.143080601426203	0.48088891793483	0.475012471379782	0.130057622947039	0.273798333271665	NA	NA	0.155257436037033	0.455788605783897	0.192796765826643	0.186391830444336	0.31282793345377	0.0214719875780933	0.115198115319253	75.4058032000853	31	13.1128765940666	32	6.16949650645256
dgrp161_08_1wf_9100_20s_060614	1	60614	dgrp161	0.594248699364719	0.265060641044794	0.270176410675049	0.0615161329770306	0.227688763883307	92.240450894659	0.321576644239513	0.446043283440346	0.44734001159668	0.0631544325202103	0.141177696792189	2.29107734096214	2.23543607563903	0.35432447864012	0.158503516383859	0.726864719103059	0.666576341331231	0.208292240826582	0.312480698625754	NA	NA	0.141177696792189	NA	0.181107962673361	0.177162170410156	0.406032260538639	0.00873955456644542	0.0493308167664241	62.578076232815	43	11.3976075649261	44	7.96875035762787
dgrp161_09_1wf_9100_20s_060614	1	60614	dgrp161	0.702206193444756	0.463744225173161	0.512669563293457	0.200489899019453	0.391070415281686	86.0652459620026	0.344160654429442	0.660410331754849	0.689745903015137	0.194716044506847	0.2823011251762	1.6659318644423	1.44980926400378	0.579159646631589	0.399472993455833	0.569951707529206	0.41072600053725	0.401959895160977	0.978657047849888	NA	NA	0.2823011251762	0.426024075432231	0.197566204766432	0.214327812194824	0.299156744325089	0.02967623309203	0.13846188596865	56.4449745880889	29	13.4485825300217	30	5.92698614299297
dgrp161_11_1wf_9100_20s_060614	1	60614	dgrp161	0.724410697857102	0.457561065112391	0.503278255462646	0.204529334239979	0.406394140855464	101.083974700635	0.407695921989579	0.631632120378556	0.661710739135742	0.194760508449505	0.294328770761497	1.76678527404407	1.51123435189536	0.681873685235314	0.451203140254272	0.514450238254802	0.321448476110596	0.389120950545926	NA	NA	NA	0.294328770761497	0.380000653354847	0.173873503692448	0.177059173583984	0.275276538482939	0.0115250478296512	0.0650915035711752	59.8724504366886	31	14.1843930184841	32	5.56395211815834
dgrp161_12_1wf_9100_20s_060614	1	60614	dgrp161	0.623333544615987	0.381232378073037	0.307546615600586	0.300329248295617	0.97653244438774	93.8020688737727	0.39940835681422	0.611602538265288	0.531206607818604	0.300546912462515	0.565781577335246	1.91204166938158	1.88250839302706	0.640973434229554	0.340489018058972	0.950292461992789	0.781256545674618	0.631119512553737	0.807826207726379	6.25	NA	0.565781577335246	0.604277531086609	0.230370160192251	0.232986450195313	0.376666455384013	0.013886723665416	0.0596031385249002	56.3367386791248	32	12.1994360983372	32	7.37184512615204
dgrp177_01_1wf_9100_20s_060614	1	60614	dgrp177	0.732000698983893	0.444138354268567	0.428702831268311	0.185190538650381	0.431978809429595	87.5139497808778	0.383574113582202	0.606745806233636	0.587138175964355	0.188865184347619	0.321670761805624	1.81957935256414	1.7031765961352	0.583341784086811	0.342502231072523	0.433739885437611	0.391312544838747	0.18055874986876	0.461418250578101	NA	NA	0.321670761805624	0.366494805845798	NA	NA	0.26827445405309	0.00924653701538738	0.0551628412792469	53.9458640676002	29	12.8800122737885	30	4.88323199748993
dgrp177_02_1wf_9100_20s_060614	1	60614	dgrp177	0.714172231844257	0.519410972411816	0.400744438171387	NA	1.23265007472148	90.7461474733225	0.431794060291559	0.727290910023909	0.596457481384277	NA	0.830935721538857	1.65278497588039	1.70349721638106	0.508257440294275	0.298361180403937	0.583967452096378	0.4997271199521	0.346305453984999	0.69298911377512	7.69230769230769	NA	0.830935721538857	0.400019411197319	0.207774471353602	0.205032348632813	0.285682755675815	0.0171918358898505	NA	51.5625	26	13.5046852827072	27	5.60991072654724
dgrp177_03_1wf_9100_20s_060614	1	60614	dgrp177	0.575836135888571	0.313498273491859	0.288811206817627	0.145813534967042	0.504874920103492	112.510850171217	0.372596232891706	0.544422716730171	0.512581825256348	0.147177671727777	0.287130101919185	1.93435395674228	1.95091188868794	0.382203898184109	0.195910384472133	0.832277822871127	0.833348114391748	0.248776676138999	0.2985267163178	NA	NA	0.287130101919185	0.736605151493148	0.230924443238311	0.232990264892578	0.424163864111429	0.00694544275652789	0.0298100127047374	70.5897312379782	36	11.2859378457069	36	8.31327995657921
dgrp177_05_1wf_9100_20s_060614	1	60614	dgrp177	0.650917965741076	0.405856820844835	0.410064697265625	0.0304018161539852	0.0741390720944993	92.3065967983871	0.389678087665028	0.623514547463386	0.624546051025391	0.0259836349617104	0.0416040337122459	1.60669381830989	1.60116295404988	0.0695486749003609	0.0434363502630691	0.540536694643634	0.522752115204823	0.0633958214814289	0.121273199356811	NA	NA	0.0416040337122459	0.536037342918142	0.21755441185087	0.214357376098633	0.348916336813528	0.00916712400915021	0.0427656102906023	56.3367386791248	31	12.5815614461899	32	6.96174117922783
dgrp177_06_1wf_9100_20s_060614	1	60614	dgrp177	0.55941066870721	0.320170781191658	0.242317914962769	0.243687044300249	1.00565013667145	104.699159798443	0.357586677048516	0.57233585110482	0.503122329711914	0.24083053967078	0.478671936124717	1.98838114072219	2.0639065926063	0.637673886126654	0.308964508573714	1.22932242549226	1.166840076414	0.746588771408545	0.639838129063071	NA	NA	0.478671936124717	0.788380490183442	0.252416397418295	0.251636505126953	0.441028457209237	0.0125090425271476	0.0497107624382107	67.2601351563465	34	10.8858065605164	35	8.83457390964031
dgrp177_07_1wf_9100_20s_060614	1	60614	dgrp177	0.792032776350574	0.902840536087751	NA	0.253747676967254	0.29594665329375	87.639397889876	0.481738443136756	1.13990299776196	NA	0.255335117268788	0.232182941221311	NA	NA	0.187868016014903	0.190845378352145	0.281405229994526	0.325311706709045	0.0828050975167049	0.254540785987652	37.5	NA	0.232182941221311	0.262308816914949	0.236823032884037	0.233000755310059	0.207757180522382	0.0113137810084447	0.0485568426307858	45.4201307929645	16	14.445448577404	17	4.02599155902863
dgrp177_08_1wf_9100_20s_060614	1	60614	dgrp177	0.634187178515808	0.358795939122929	0.316840171813965	0.153364187350231	0.484042747711548	107.857780346389	0.390870436800262	0.565757163307246	0.522001266479492	0.153518690526645	0.294096394750178	1.86639781335999	1.95055408474332	0.402613262465843	0.206409689233931	0.651227927048279	0.699885053942786	0.201945738149365	0.288541292618993	NA	NA	0.294096394750178	0.577411108106662	0.207172760793141	0.205047607421875	0.36618672149385	0.00802784808046564	0.0391511424171302	65.6993626300895	34	12.1990619301796	35	7.25104662775993
dgrp177_09_1wf_9100_20s_060614	1	60614	dgrp177	0.736570837565456	0.627664461084034	0.223675727844238	NA	NA	79.9932858510638	0.431193676770334	0.852144056040308	0.447341918945313	NA	NA	1.96725208485114	2.23542654432582	0.843251961752962	0.377221950724969	0.947831691336689	0.999968856222527	0.532136738812483	0.532153312076816	13.0434782608696	NA	NA	0.357581901233262	0.22444145133098	0.223648071289063	0.263384400489632	0.012049139465738	0.0538754454545002	45.5006868080032	23	14.4362826049328	24	5.38659483194351
dgrp177_10_1wf_9100_20s_060614	1	60614	dgrp177	0.72234929330048	0.59563937653666	0.568392753601074	0.0930088228865095	0.163634779467628	97.0764035438067	0.466655872302673	0.824586362942405	NA	0.098238066791405	0.12400902302955	1.2269494697196	1.26233167121322	0.132528379486226	0.104986971735292	0.390584551892779	0.396821942016603	0.0530386312602999	0.133658514422775	NA	NA	0.12400902302955	0.384002738838612	0.2287271519502	0.22375226020813	0.27738410702552	0.00826530363166273	0.0369395313547873	51.7751297680653	23	13.6997056603432	24	5.48945164680481
dgrp177_11_1wf_9100_20s_060614	1	60614	dgrp177	0.555494668395896	0.305149481977735	0.260847091674805	0.190244972563869	0.729335226022169	109.38616014492	0.456446959182451	0.549329272338322	0.475305557250977	0.246958446025676	0.519578284449289	2.05188224113412	2.10390975814316	0.609434643822065	0.289667672989897	0.981677251852812	0.822154300631037	0.532108294401137	0.647212200912557	2.85714285714286	NA	0.519578284449289	0.800197296020326	0.244179790360587	0.214456558227539	0.444505331604104	NA	NA	59.4571799701264	35	10.6802318692207	35	8.54629266262054
dgrp181_01_1wf_9100_20s_190614	1	190614	dgrp181	0.736931586945491	0.557676122188568	0.521889686584473	0.136310989939793	0.261187360938066	89.0762050858702	0.290503970846478	0.756754266023636	0.726822853088379	0.137171744039226	0.188727890787092	1.3596398145946	1.37585106983201	0.219737475360462	0.159710218771928	0.374479388515607	0.392944285737785	0.0780250046342074	0.198565057353383	NA	NA	0.188727890787092	0.356744273778453	0.198947763213745	0.195716381072998	0.262896123809272	0.00606793260468668	0.0310037032741959	63.1992138004896	25	13.9419030547142	26	5.17264184355736
dgrp181_02_1wf_9100_20s_190614	1	190614	dgrp181	0.694822773194808	0.487282781728676	0.493838310241699	0.0213997006279682	0.0433334153794074	72.6352456198091	0.345750374182052	0.701305139277663	0.708191394805908	0.0214607715479228	0.0303036321894372	1.42711373666325	1.43067884440636	0.0416052622000027	0.0290807838269714	0.439568245124533	0.433991662917747	0.0195256357277145	0.0449908083405167	NA	NA	0.0303036321894372	0.439215924662316	NA	NA	0.305177226805192	NA	NA	47.5215822679548	28	13.6439178884029	28	5.99262601137161
dgrp181_03_1wf_9100_20s_190614	1	190614	dgrp181	0.802356506610753	0.753108052980332	0.717610359191895	NA	NA	89.117307697495	0.333512679108822	0.938620235238756	0.904006958007813	NA	NA	1.25944084536751	1.10618617604861	NA	NA	0.329876468366486	0.259879144522897	NA	NA	14.2857142857143	NA	NA	0.246328772510509	0.185512182258424	NA	0.197643493389247	0.00704254919851998	0.0377829923324616	59.3955556523382	21	15.815269112587	21	3.89575582742691
dgrp181_04_1wf_9100_20s_190614	1	190614	dgrp181	0.753315683713849	0.599966083963712	0.605778694152832	0.0352200194397571	0.0581400762022697	89.0762050858702	0.41690481051547	0.796433815111717	0.801488876342773	0.0384656600899437	0.0479927560136132	1.25845039466569	1.2623888510912	0.0598124179937168	0.0473803439740579	0.32691129886929	0.327917976044468	0.0163509025312092	0.0498627819323692	NA	NA	0.0479927560136132	0.326792964403162	0.196064695119858	0.195709228515625	0.246178265412243	0.00721504346716344	0.0368661382086405	51.9399066831083	24	14.3991860151291	25	4.90161737799644
dgrp181_06_1wf_9100_20s_190614	1	190614	dgrp181	0.634311178149602	0.327690950922064	0.307549476623535	0.0520303891290204	0.169177296935249	NA	NA	0.516609137928164	0.503255844116211	0.0506990590848609	0.100742116912513	1.9517339867005	1.98706087905674	0.173760041055053	0.0874457561348282	0.587091767915723	0.606036174877283	0.0766592535265193	0.126492867429972	NA	NA	0.100742116912513	0.577058805823205	0.189096948818157	NA	0.36603485098332	0.00544056667458586	0.0291881967115487	NA	37	12.1245651841164	38	7.18568405508995
dgrp181_07_1wf_9100_20s_190614	1	190614	dgrp181	0.728399818270001	0.568868501186371	0.577823162078857	0.0517260221991294	0.0895187759746989	81.2650226496615	0.327047501902988	0.780983859300613	0.792167663574219	0.0525242522166752	0.0663044638551498	1.28718194617049	1.26235902572449	0.106415990603312	0.0842993066431617	0.376113352190417	0.366663141988805	0.0452451276327791	0.123396988820219	NA	NA	0.0663044638551498	0.373023717104235	NA	NA	0.271710407749125	0.00516489658895352	0.0240954361270423	54.6875	25	14.2217125296593	26	5.51723751425743
dgrp181_08_1wf_9100_20s_190614	1	190614	dgrp181	0.723423711123355	0.504929682505982	0.49395751953125	0.0363838014049195	0.0736577538883233	93.7630199292344	0.416747668310233	0.69797225988337	0.689637660980225	0.0372400904274952	0.0539995022524779	1.43656004603152	1.45004183174649	0.0751477918073783	0.0518245682035718	0.384877551672629	0.392162331356293	0.0295883740639932	0.0754493017257978	NA	NA	0.0539995022524779	0.381861700207347	0.19281330704689	0.195707321166992	0.276247808299873	0.00573953172344764	0.0293271181130227	54.6875	28	14.1380311101675	29	5.59158590435982
dgrp181_09_1wf_9100_20s_190614	1	190614	dgrp181	0.787631055789106	0.740684388648896	0.633754730224609	NA	NA	NA	NA	0.940395104033606	0.829465866088867	NA	NA	1.2721135443691	1.20559511956199	NA	NA	0.382504159222458	0.344129676914972	NA	NA	19.047619047619	NA	NA	0.26962997795729	0.19971071538471	0.195753812789917	0.212368944210894	0.0083785090350965	0.0428012559024243	NA	21	15.5543721616268	21	4.19392502307892
dgrp181_10_1wf_9100_20s_190614	1	190614	dgrp181	0.707858307421977	0.423603475996942	0.42869758605957	0.0303487179274917	0.0707928360559384	NA	0.428621544359878	0.598429758548301	0.596534729003906	0.0307367033814636	0.0515254215505403	1.67544388462833	1.6763483354436	0.0860207216503921	0.0513143478784371	0.413960960042684	0.404585405796218	0.0303394024169825	0.0749888700440763	NA	NA	0.0515254215505403	0.412219152589359	NA	NA	0.291792751638825	0.00480739255672433	0.027149870509828	65.2706205443919	33	13.9789147078991	34	5.93699384091846
dgrp181_11_1wf_9100_20s_190614	1	190614	dgrp181	0.757293683405432	0.605784993618727	0.605869293212891	0.0433666893052956	0.071577631992743	NA	NA	0.799934037340184	0.801582336425781	0.0431362506692934	0.0538138737707669	1.25393998358569	1.24767720997474	0.0717054119651413	0.0574711242554416	0.32281110895815	0.322874232645994	0.0240282861056031	0.0744199557477486	NA	NA	0.0538138737707669	0.320594814089112	0.194211527407169	0.195711135864258	0.242784427642223	0.00373108568634533	0.0190642482854586	NA	24	14.5388398468494	25	4.85528818517923
dgrp181_12_1wf_9100_20s_190614	1	190614	dgrp181	0.645379158196148	0.360537488119943	0.363459587097168	0.0179033247047575	0.0492580890429814	81.78907705189	0.368410648055993	0.558644455032689	0.559198617935181	0.0183701071149625	0.0328507734564749	1.79203449262674	1.78827337537503	0.0606319377656435	0.0339052958012797	0.55079414980718	0.55003504858194	0.0291493707503796	0.0529954787890888	NA	NA	0.0328507734564749	0.550010318375611	0.198299338627193	0.195722579956055	0.354965196272447	0.00490625200120886	0.0250673785431934	51.6571101713017	35	12.618812084198	36	7.13877619057894
dgrp189_01_1wf_9100_20s_050614	1	50614	dgrp189	0.655873413185075	0.526185060540835	0.521907806396484	0.0488975654823284	0.0936900442626867	93.9581023648307	0.484209516364591	0.80226618424058	0.792171478271484	0.0577526606325942	0.0729042413375073	1.25298701868005	1.26236054545433	0.0933758515238913	0.0739692410857828	0.532671355676109	0.517861058575227	0.103728944232699	0.200302653607678	NA	NA	0.0729042413375073	0.524951245737423	0.276221503019333	0.270271778106689	0.344301565297561	0.0219035142857123	0.0810425507211703	48.4626950602213	24	12.62844145298	25	6.90553757548332
dgrp189_02_1wf_9100_20s_050614	1	50614	dgrp189	0.619788437326077	0.443912272100095	0.475296020507813	0.100949542605267	0.212392989315187	84.7345825144489	0.437433381795654	0.71623193555408	0.736226081848145	0.0998841221358529	0.135670447704208	1.42679951883075	1.35827842106559	0.237023359937772	0.174502779593468	0.652784641732823	0.579985632977842	0.205073521040651	0.353583794804942	NA	NA	0.135670447704208	0.613453784833822	0.272319663453985	0.270274639129639	0.380211562673923	0.00879134973634236	0.0325274682251099	47.6688475301107	27	11.9856313467026	27	7.3526309132576
dgrp189_03_1wf_9100_20s_050614	1	50614	dgrp189	0.495703077594588	0.259706443226015	0.279583930969238	0.0559306673882181	0.20004964947135	90.625	0.478181174123395	0.523915333522333	0.540524482727051	0.0747083042529516	0.138214468798959	1.94096119856388	1.85005495949935	0.261412028532603	0.141299601501214	1.08270715711733	0.928492979694246	0.427163500881081	0.46006109924681	NA	NA	0.138214468798959	1.0151164829294	0.263632291241696	0.251631915569305	0.503196364705097	0.0471853432036685	0.187517323058619	47.2898310950674	37	9.60913839936256	38	10.0180270671844
dgrp189_04_1wf_9100_20s_050614	1	50614	dgrp189	0.425553441540175	0.150779205241374	0.158348560333252	0.0193415633034586	0.12214549512009	72.0276910726007	0.392594718107763	0.354313208455486	0.354129791259766	0.0480093353842018	0.135569885869855	NA	2.82428738037714	0.233456364888665	0.0826602726445955	1.36611658009481	1.25078875456774	0.354202159170913	0.283183037805071	NA	NA	0.135569885869855	1.34988112510798	NA	NA	0.574446558459825	0.0495963813971317	0.2534143939532	43.75	NA	8.44363549351692	NA	11.3979041799903
dgrp189_05_1wf_9100_20s_050614	1	50614	dgrp189	0.549446028528916	0.325320567935705	0.326192617416382	0.0811752770263176	0.248856879929622	86.0652459620026	0.400890575241432	0.592088305391371	0.596458435058594	0.0785173383284571	0.131639245441711	1.72220090428283	1.67656812113266	0.261069895045843	0.155716843088648	0.904344384027287	0.800044732721986	0.3850069445978	0.481231772238401	NA	NA	0.131639245441711	0.819473071606673	0.2665914450631	0.260963916778564	0.450256224680679	0.012142985128389	0.0465312801795991	51.5625	32	10.4102581739426	33	8.79751768708229
dgrp189_06_1wf_9100_20s_050614	1	50614	dgrp189	0.473006659806964	0.216721769682197	0.21436882019043	0.0281543016339834	0.131335805314286	98.6357131380414	0.411955156670323	0.458179108451965	0.456584930419922	0.0293697157617755	0.064324759327392	2.19115863033848	2.19017302888271	0.135302637736587	0.0617771454365913	1.13420417115135	1.12504157250672	0.176100124753625	0.156527660005714	NA	NA	0.064324759327392	1.1141351379875	0.241457338769769	0.242330551147461	0.526993340193036	0.0110075652844414	0.0454237620156411	58.0022224789706	43	9.31903609633446	43	10.3826655671
dgrp189_07_1wf_9100_20s_050614	1	50614	dgrp189	0.61209045515022	0.440086865866626	0.438055574893951	0.12029432103432	0.274609725178003	84.375	0.402795722348256	0.718989917525539	0.698973655700684	0.155460996706205	0.222413241812903	1.45824100760702	1.43066908436993	0.332002989946876	0.232061343586725	0.692271326221418	0.595775672121439	0.302639398219988	0.507975421591737	NA	NA	0.222413241812903	0.633745456387781	0.278903051658913	0.260940551757813	0.387909544849781	0.0807316494819683	0.309387134112056	50.3891109268659	27	11.8823453783989	27	7.53038239479065
dgrp189_08_1wf_9100_20s_050614	1	50614	dgrp189	0.538144576648189	0.274131270615678	0.279611587524414	0.0828659164635949	0.296360809640479	73.5039592896192	0.425657805687152	0.509400786537873	0.512605667114258	0.0961579309148463	0.187586554507235	2.02959059727047	1.97984985574672	0.366395255984406	0.185062142425046	0.943177238901089	0.858058659413686	0.382762487716974	0.446079628143974	NA	NA	0.187586554507235	0.858892872110693	0.235449394354453	0.232986927032471	0.462208541048156	0.0518319527215885	0.222467214713574	42.2164252690822	38	10.4169882833958	39	9.18252637982368
dgrp189_09_1wf_9100_20s_050614	1	50614	dgrp189	0.480064281177382	0.282677312692006	0.223680257797241	NA	NA	96.1286775954502	0.447355343599209	0.588832212216926	0.503259658813477	NA	NA	1.8660033426699	1.9870458171785	0.515193773745546	0.259276242798011	1.35466525560449	1.131557977305	NA	0.740426496026768	3.03030303030303	NA	NA	1.0830543725258	0.30615489952492	0.242388725280762	0.519935718822618	NA	NA	53.125	33	9.32835131883621	33	10.1031116843224
dgrp189_10_1wf_9100_20s_050614	1	50614	dgrp189	0.585363790629565	0.395609409644686	0.391450881958008	0.0209771200741591	0.0535881282709931	81.3100739453606	0.403976743487065	0.67583512334988	0.671010971069336	0.020536115349039	0.0306047385727722	1.48091796131352	1.49028859901706	0.0439475197671065	0.029489267915015	0.712504086622018	0.707329735126197	0.0571711528283897	0.0808267346744437	NA	NA	0.0306047385727722	0.708339354104032	0.280225713705194	0.27958869934082	0.414636209370434	0.0158423373826172	0.0566630104148282	48.4626950602213	29	11.4726728796959	29	8.12654569745064
dgrp189_11_1wf_9100_20s_050614	1	50614	dgrp189	0.659208440562181	0.576034046354748	0.57781982421875	0.0763732168768455	0.132174795110408	79.7487509698428	0.353141357291384	0.873826867058164	0.876039505004883	0.0764441331043122	0.0872610569130511	1.153224419517	1.14150103310059	0.102109357596357	0.0894518310850787	0.526233343475713	0.516111888665892	0.0715105312634411	0.138556256567331	NA	NA	0.0872610569130511	0.517741286982161	0.298236608505249	0.298234462738037	0.341299426406167	0.0056295652351706	0.0188763068610065	51.5861688100599	21	12.0967149734497	22	6.56120538711548
dgrp189_12_1wf_9100_20s_050614	1	50614	dgrp189	0.646612787538442	0.554958029226823	0.587145566940308	0.0700074382497762	0.119233529454364	86.2918829467755	0.455579718762287	0.858254027637568	0.894684791564941	0.0733297002516197	0.0819614918493861	1.17200012936599	1.12932195513088	0.101847125572678	0.090184313791079	0.553591953579709	0.523790670845876	0.0702116293041005	0.134045207774921	NA	NA	0.0819614918493861	0.546124246053109	0.303076035302618	0.307417869567871	0.353130921082731	0.00635650403215852	0.020677080486875	46.9790511824153	22	12.2090766429901	23	6.97074881196022
dgrp195_01_1wf_9100_20s_060614	1	60614	dgrp195	0.82933359074011	0.875541259845098	0.671142578125	0.639957259532125	0.953533988739026	NA	NA	1.05571662551827	0.838890075683594	0.652727995748156	0.778085251773019	1.34314252382493	1.20561768786603	0.91163928197619	NA	0.412768808049301	0.246381572361508	0.588893676684534	NA	27.7777777777778	NA	0.778085251773019	0.203911761285094	0.178533160372784	0.167747497558594	0.169110873180707	0.0268847058841789	NA	NA	18	15.7597426772118	19	3.3921300470829
dgrp195_02_1wf_9100_20s_060614	1	60614	dgrp195	0.7661750537983	0.797359463241365	0.829441070556641	0.207774395054463	0.250499284916076	79.0569415042095	0.280570972923666	1.0407014158037	1.0624303817749	0.203645955111451	0.191679340693588	0.993974955480844	0.98441849352171	0.174813610078123	0.177580583083863	0.324830672041713	0.316459934664397	0.0759358068600468	0.239953935845231	11.1111111111111	NA	0.191679340693588	0.305723317697678	0.24377138049979	0.242306232452393	0.234237579384413	0.0106884873369036	0.0441114833437214	56.8758585100041	18	14.3524703383446	19	4.631656229496
dgrp195_03_1wf_9100_20s_060614	1	60614	dgrp195	0.829485434178742	1.04877220392227	0.894588470458984	0.548381941315162	0.612999115709377	106.261488349496	0.396944715904358	1.26436482270559	1.07175636291504	0.561428186581926	0.523839378060619	0.944737359243046	0.933047877859226	0.400998479164596	0.42977267156391	0.258345262052226	0.229193939729906	0.128145348654747	0.559113163313831	46.6666666666667	NA	0.523839378060619	0.204937469075151	0.214932721108198	0.214345932006836	0.169992645515294	0.0234135946333464	0.109232745469598	64.0815520450309	15	15.7315830588341	16	3.43892353773117
dgrp195_04_1wf_9100_20s_060614	1	60614	dgrp195	0.850834529727862	1.06307968298594	0.708339214324951	1.11745444559424	1.57756964882874	NA	NA	1.24945526520411	0.894726276397705	1.11693755262786	1.2483567120939	1.20226811115261	1.11766025697395	0.580422014154479	0.519318827463693	0.30970859380645	0.263086042026395	0.177998080493997	0.676577438783843	26.6666666666667	NA	1.2483567120939	0.175865064939224	0.186958577483892	0.186384975910187	0.149632069823125	0.00700127806383657	0.0375635323053628	NA	15	15.9461952447891	16	2.99133723974228
dgrp195_05_1wf_9100_20s_060614	1	60614	dgrp195	0.821028323548754	0.942959142958417	0.577817916870117	0.785652804334422	1.35968924015041	105.257311206871	0.434150988717083	1.14850988195223	0.773514747619629	0.788974221641289	1.01998601069887	1.13348285020675	1.29280017359377	0.503614987408782	0.389553619882967	0.317207801284658	0.354835728173287	0.160572102828987	0.452525183006855	35.2941176470588	NA	1.01998601069887	0.217404840897671	0.205003882447879	0.205035209655762	0.178495532053598	0.0164281647581306	0.0801236274770183	59.559745476706	17	16.0303054302931	18	3.69006988406181
dgrp195_06_1wf_9100_20s_060614	1	60614	dgrp195	0.88291687424904	NA	NA	0.848765256043172	0.523375850782172	82.8272392543661	0.302011022938296	NA	NA	0.852868570685104	0.462163048132016	0.624051565486403	0.541892460359706	0.253998362765205	0.468724666507819	0.159314041131293	0.133689898097774	0.0696663720999978	0.521104235183479	66.6666666666667	NA	0.462163048132016	0.131007606520887	0.219908952713013	0.223671913146973	0.11566882645227	0.0161417234014246	0.0721669662244004	57.8125	9	15.1073714494705	10	2.19908952713013
dgrp195_07_1wf_9100_20s_060614	1	60614	dgrp195	0.877723384141707	NA	NA	0.368036856286579	0.23366934141077	85.9375	0.254323758021459	NA	NA	0.367915204436014	0.203500292643926	0.547285315353441	0.553117376477757	0.106939402988536	0.193339438492286	0.146122720121168	0.147928162870869	0.0332165746477805	0.224545306337483	NA	NA	0.203500292643926	0.139386660697803	0.231843972206116	0.232990741729736	0.122342931531887	0.00360015621941303	0.0154519282297883	64.0815520450309	9	14.969838142395	10	2.31843972206116
dgrp195_08_1wf_9100_20s_060614	1	60614	dgrp195	0.850035023602646	1.1407509803772	1.062575340271	0.253967508487439	0.239011295352166	NA	NA	1.34200468063354	1.24896621704102	0.248947363409784	0.199322735885985	0.765772374037729	0.800662168724745	0.125669539721438	0.15695700962317	0.175827877535755	0.184061799099077	0.0372052007446898	0.202134288194493	60	NA	0.199322735885985	0.175612610343347	0.200330257415771	0.195713043212891	0.149276869378129	0.0197218109868118	0.100769017041746	NA	5	NA	6	1.20198154449463
dgrp195_09_1wf_9100_20s_060614	1	60614	dgrp195	0.721604573167128	0.602919542789459	0.465971946716309	0.436758802394574	0.937307074969644	95.3253065166853	0.458096574153057	0.835526221990585	0.70831024646759	0.436542915166954	0.616315967959004	1.45730002541022	1.43492730775968	0.582948621562425	0.406256552795396	0.572111098764652	0.510181326161582	0.351894827921118	0.689744625834597	10	NA	0.616315967959004	0.386572596319298	0.233072173027765	0.232993125915527	0.278952553365095	0.00796192798218833	0.0341723729011429	51.6571101713017	20	12.0583908557892	21	4.89451563358307
dgrp195_10_1wf_9100_20s_060614	1	60614	dgrp195	0.717157223707871	0.581473796263985	0.344829559326172	0.540765885547117	1.56821209470505	104.873901215936	0.372654235606784	0.810803791751032	0.559305191040039	0.544974910440238	0.974378423749021	1.56430849203731	1.78793262787438	0.660005621941274	0.369144570467364	0.640218433608492	NA	0.368996860750346	0.538101149752644	13.0434782608696	NA	0.974378423749021	0.394394376772454	0.229329995487047	0.223675727844238	0.282842776292129	0.0119591733388612	0.0534665672226593	65.7921977232103	23	13.3738973140717	23	5.27458989620209
dgrp195_11_1wf_9100_20s_060614	1	60614	dgrp195	0.771214013472266	0.730034469139008	0.615095615386963	0.416381531792464	0.676937896119636	95.7724557545122	0.307440970710963	0.946604258203436	0.838769435882568	0.408297785439032	0.486781906888886	1.21659556392129	1.1922227458703	0.4253804066625	0.356796083731803	0.362404299591791	0.323076244916979	0.17446573004232	0.540014107466033	19.047619047619	NA	0.486781906888886	0.296656936377054	0.216569789064427	0.214358806610107	0.228785986527734	0.0127067688826253	0.0592780351951548	66.3280789899723	21	15.3307238519192	21	4.54796557035297
dgrp195_12_1wf_9100_20s_060614	1	60614	dgrp195	0.790940851605308	0.754451441764832	0.242308616638184	1.27174686220611	NA	NA	NA	0.953865817189217	0.447257995605469	1.26831796099346	NA	1.88715542558999	NA	0.918075036096731	0.402053574443591	0.68951296940438	NA	0.418025937369659	0.498067213456956	20	NA	NA	0.264317044656857	0.199414375424385	0.195713996887207	0.209059148394693	0.00831989216017765	0.0425104606339041	NA	20	15.0890288352966	20	3.9882875084877
dgrp208_01_1wf_11440_20s_240215	1	240215	dgrp208	0.475937855745279	0.220373746894655	0.237710952758789	0.0599249594159103	0.252091705158902	65.9201957293818	0.363475318707939	0.46303050752197	0.467758178710938	0.087889148169338	0.18789441247515	2.21922512585796	2.17335977378799	0.341092919006407	0.156942685293153	1.2532660842598	0.967734106249185	0.940588091834477	0.9719488914988	NA	NA	0.18789441247515	1.09735693566201	0.241828659592673	0.222404003143311	0.522273706946185	0.0735560747733011	0.330731793194854	41.959831577355	42	9.2556973695755	43	10.3986323624849
dgrp208_02_1wf_11440_20s_240215	1	240215	dgrp208	0.447813466253827	0.205225511675789	0.214693069458008	0.0344122278179893	0.160285694852018	53.3369648962275	0.175017690299105	0.458283475467137	0.467770576477051	0.0349385262172161	0.074691585948716	2.19504121908894	2.13787640769009	0.186884079851883	0.0874157548021243	1.27502320697431	1.18514010814396	0.282887397051566	0.23869531974122	NA	NA	0.074691585948716	1.23307518034214	0.253058484820432	0.253061294555664	0.552187670660578	0.00369476001608627	0.0146002573114695	44.0020524925253	42	8.61947149038315	43	10.8815148472786
dgrp208_03_1wf_11440_20s_240215	1	240215	dgrp208	0.732776962107954	0.674315102895101	NA	0.354125645773282	0.641354625842206	70.9073026704584	0.231435270322547	0.920218753814697	0.789848327636719	0.366141989350782	0.463559871610166	1.19332628474436	1.26606585721599	0.315894654098358	0.249508864248968	0.420594088184728	0.434772970176934	0.127459081921209	0.293162387416446	6.66666666666667	NA	0.463559871610166	0.363202398591107	0.24491286277771	0.24537181854248	0.266146350269914	0.0134184220740659	0.0546860766398191	54.4968519090782	15	10.1147265434265	16	NA
dgrp208_04_1wf_11440_20s_240215	1	240215	dgrp208	0.618065376364907	0.703694546923918	0.19940185546875	NA	NA	73.887668964449	0.370860497376402	1.13854387227227	0.843532919883728	0.993052790421742	1.17725433947335	1.32823211939363	1.18549018826419	0.742527742056715	NA	2.40747615449637	1.26959159167779	3.74583420717092	2.95042455520734	17.6470588235294	5.88235294117647	1.17725433947335	0.617951819080054	0.434849325348349	0.253089904785156	0.381934623635093	0.388297417849941	1.53422720744061	46.4856513023105	17	11.9628072977066	17	7.39243853092194
dgrp208_05_1wf_11440_20s_240215	1	240215	dgrp208	0.409041821150624	0.249468300491571	0.253047943115234	0.0606356773176135	0.239621300893171	72.9297318382565	0.24747424442283	0.609884582925588	0.475452423095703	0.484086547983753	1.0181598083607	1.95962898872091	2.10327674187233	0.491272484852052	0.233574819267351	1.89408516620352	0.878837529207809	3.67052546326523	4.17656886657295	NA	6.06060606060606	1.0181598083607	1.43169710332308	0.357163043184714	0.222388029098511	0.585623990479345	0.461737847020947	2.07627114144895	54.8815015556244	32	7.98298561573029	33	11.7863804250956
dgrp208_06_1wf_11440_20s_240215	1	240215	dgrp208	0.515154353952288	0.218219713024471	0.214740753173828	0.0138876672435437	0.0646717823155902	77.3193370380269	0.385933433584537	0.423600638042326	0.421768188476563	0.0115852425188461	0.0274682700956948	2.36241062569083	2.37097602062159	0.0634319912553026	0.0267535355497492	0.94676149206927	0.928601728323224	0.1040436558612	0.11204335797336	NA	NA	0.0274682700956948	0.941165773574375	0.205380925017854	0.207024574279785	0.484845646047712	0.00985200540308085	0.047588579459008	47.4792198124611	46	10.0381067991257	46	9.4475225508213
dgrp208_08_1wf_11440_20s_240215	1	240215	dgrp208	0.509462718354438	0.323353911439578	0.345081090927124	0.129165452933809	0.37430463832945	54.4527189403798	0.157866287820521	0.634695925315221	0.598124861717224	0.196055716854379	0.327783928411704	1.70540761859354	1.67189537898332	0.463812106087955	0.277416943618805	1.18981000859355	0.720973514674302	1.00378009991367	1.3922565524021	NA	NA	0.327783928411704	0.983811010861011	0.318119138479233	0.237733840942383	0.501215031940278	0.191874310371751	0.807097170563336	45.8564703395279	30	9.70061734318733	31	9.86169329285622
dgrp208_09_1wf_11440_20s_240215	1	240215	dgrp208	0.691670243052719	0.559799794107676	NA	0.199921626527386	0.372437266743856	55.0746378108835	0.0929601617548408	0.809344915052255	0.774515151977539	0.200012565412324	0.258242288613257	1.30689677514166	1.34436267596605	0.304893075965448	0.226793767348795	0.500934050898532	0.492337333353742	0.165293579158034	0.335732368764469	4.16666666666667	NA	0.258242288613257	0.446027174545347	0.249685920476913	0.245406150817871	0.308503724225898	0.00866813572502639	0.0353215911505799	49.9548905713945	24	NA	25	6.24214801192284
dgrp208_11_1wf_11440_20s_240215	1	240215	dgrp208	0.310166958566428	0.233002772698036	0.199378967285156	0.152054242492827	0.762639332339182	52.6342449931601	0.350463550619103	0.751217259810521	0.467767715454102	1.20745496193107	NA	2.00114997905118	2.17339919039753	0.610303835330778	0.280806139077999	1.92140977297284	1.47807681494777	1.59573778947792	1.07960409996303	NA	7.69230769230769	NA	NA	0.518214487112485	0.260746955871582	0.689833041433572	NA	4.12632362089866	NA	26	6.05807209014893	26	13.4735766649246
dgrp208_12_1wf_11440_20s_240215	1	240215	dgrp208	0.447930315629624	0.143817226417729	0.145698070526123	0.0248181893454039	0.170339862812076	65.2266494770351	0.345171663191404	0.321070535749686	0.322055816650391	0.0250677547778924	0.0778366776250615	3.13016117569486	3.10505182114303	0.203546487697302	0.0655533303216733	1.27930498390727	1.21044088386218	0.338530373700915	0.279675263958995	NA	NA	0.0778366776250615	1.23249011086551	0.177253309331956	NA	0.552069684370376	0.0177697667861795	0.105313748968987	42.7122583926441	61	8.77285081148148	61	10.8124518692493
dgrp21_01_1wf_9100_20s_060614	1	60614	dgrp21	0.834467506325611	1.33115338285764	1.08107948303223	NA	0.721111297012294	90.0771572237235	0.266087143841785	1.5952129624784	1.35135650634766	NA	NA	0.734997938213967	0.750350102221977	0.264187516444899	0.352085667293938	0.24547208078414	0.24324710524375	0.0997565103484098	0.410103586837949	75	NA	NA	0.199804260012093	0.265970116624465	0.260951519012451	0.166730162605525	0.018092205361242	0.0693316729088622	66.1087837326755	12	15.9738405942917	13	3.45761151611805
dgrp21_02_1wf_9100_20s_060614	1	60614	dgrp21	0.679879034436615	0.464133310317993	0.456772804260254	0.0334322284044525	0.0731922480774576	95.4276967787654	0.408505323994689	0.682670426368713	0.671122550964355	0.0349128004793592	0.0520214980545534	1.46813218111078	1.49027800872926	0.0718655788513266	0.0482229345332725	0.471100003998038	0.479158006041652	0.0350427522318786	0.0731340221597641	NA	NA	0.0520214980545534	0.470407159551679	0.218331632160005	0.21435546875	0.319819965428066	0.00675323013695368	0.0315048184976791	56.4449745880889	20	9.28266620635986	21	4.58496427536011
dgrp21_03_1wf_9100_20s_060614	1	60614	dgrp21	0.819028904750499	0.92359362244606	0.521899700164795	NA	NA	93.7630199292344	0.331553795966531	1.12766914218664	0.745570659637451	NA	NA	1.88875194104831	2.68229112708176	NA	0.499518425689109	0.766886489536731	0.999716077677055	NA	0.599349242296807	10	NA	NA	0.225649965591656	0.208408869125626	0.205036640167236	0.184813844175522	0.0194945324933696	NA	62.6755347504112	10	9.2359362244606	11	2.29249756038189
dgrp21_04_1wf_9100_20s_060614	1	60614	dgrp21	0.59849777328621	0.357823667201129	0.354140281677246	0.0915890287158657	0.258623583519193	87.5139497808778	0.446516811076629	0.597869671655424	0.587223052978516	0.0951998579124644	0.162118733979518	1.71529823595612	1.70293041958723	0.275175400129802	0.161589338568807	0.721054274910092	0.702258437342742	0.185012296001297	0.263453290360398	NA	NA	0.162118733979518	0.670849992489087	0.240046004454295	0.242298126220703	0.40150222671379	0.00794895390387655	0.032806501758235	48.4375	33	11.8081810176373	33	7.92151814699173
dgrp21_05_1wf_9100_20s_060614	1	60614	dgrp21	0.560746948400016	0.270730596490023	0.270268440246582	0.0203820305447904	0.0754140236506884	89.2815289197603	0.217339519805168	0.48280351281893	0.484622001647949	0.0198538700000297	0.0409677437931355	2.07473711945709	2.06346388855544	0.0863175419804661	0.0418313799719044	0.790704938244688	0.785744568097509	0.0724414866976037	0.0921947025010982	NA	NA	0.0409677437931355	0.783335607716295	0.212072916328907	0.214335680007935	0.439253051599984	0.00742116875553669	0.034624047453331	69.8771242968684	41	11.0999544560909	41	8.69498956948519
dgrp21_06_1wf_9100_20s_060614	1	60614	dgrp21	0.553210829910042	0.263444973928172	0.260947704315186	0.030558173804816	0.117104589538394	82.0389085776777	0.369377537395026	0.47621080370211	0.46611499786377	0.0345033669074997	0.0740232926759072	2.10939464819146	2.14539331405995	0.142655754832413	0.0664939868589648	0.822797570213653	0.807618893943926	0.111536350543276	0.138105177305349	NA	NA	0.0740232926759072	0.808617274942458	0.213026156915086	0.214282512664795	0.447335833750514	0.0142314025353075	0.0664142041192595	51.7355785566794	41	10.8012439310551	42	8.9470985904336
dgrp21_07_1wf_9100_20s_060614	1	60614	dgrp21	0.783986444654891	0.841873152388467	0.838781356811523	0.0807839459077541	0.0963110890004038	84.6061648167555	0.443199061486419	1.07383636302418	1.09039467573166	0.0820716186453869	0.0752678094198475	0.936630161847871	0.932966520629656	0.0724626493380986	0.0776690778670105	0.276788651254438	0.271855568038978	0.0283587438468294	0.104315479176661	NA	NA	0.0752678094198475	0.275532258010147	0.231963210635715	0.232988357543945	0.216013555345109	0.00620072717687294	0.0266138928238223	47.1087919740042	18	15.1537167429924	18	4.17533779144287
dgrp21_08_1wf_9100_20s_060614	1	60614	dgrp21	0.435685386974255	0.143903792914698	0.13991117477417	0.0140064962751544	0.100109918294677	80.6619343696269	0.319805788687386	0.330292906801579	0.326258182525635	0.0124735994294638	0.0382322960696432	3.03144845683816	3.06505722633157	0.112486964434033	0.0366997925740732	1.30786339884216	1.26696094752067	0.144909591258818	0.114375736317992	NA	NA	0.0382322960696432	1.29523583862858	0.186389349897703	0.18639349937439	0.564315327575818	0.00449393704195301	0.0241099451270374	54.8657808314982	59	8.49032378196716	60	11.1833609938622
dgrp21_09_1wf_9100_20s_060614	1	60614	dgrp21	0.583543402090879	0.350201278924942	0.344911813735962	0.0324131313840548	0.0939751266648924	82.9450589999187	0.303002485053912	0.600128932432695	0.596453189849854	0.0304902308773953	0.0511192351659158	1.67050425155512	1.6765775035116	0.0835056011907344	0.0498071822005432	0.722676659987736	0.729755592985018	0.067459487754114	0.0924412068952775	NA	NA	0.0511192351659158	0.713668591602486	0.249927653507753	0.251623153686523	0.416456597909121	0.00399336350372054	0.0158704135339451	57.8125	33	11.5566422045231	33	8.24761256575584
dgrp21_10_1wf_9100_20s_060614	1	60614	dgrp21	0.810482235082188	1.2201662338697	NA	0.483912517873178	0.381793736674457	84.4328505381643	0.389307601586976	1.50548177499038	NA	0.48150481682072	0.309374171995997	0.761247309804243	0.642515217269753	0.340935678341241	0.530626620471313	0.263191142349549	0.227957064489606	0.134365003059064	0.589431186789081	76.9230769230769	NA	0.309374171995997	0.233833336147822	0.285315541120676	0.288908004760742	0.189517764917812	0.0129350613935263	0.0447722499216953	51.5625	13	15.8621610403061	13	3.70910203456879
dgrp21_11_1wf_9100_20s_060614	1	60614	dgrp21	0.646046351480619	0.512563824653625	0.54976749420166	0.187585112983167	0.341208083347246	89.1521656917402	0.438062537244576	0.79338552640832	0.838668823242188	0.191036908065524	0.22778587062173	1.34845484346738	1.19236577333843	0.426473590445794	0.357670104243045	0.681727642013354	0.508580627366763	NA	0.974463038672608	NA	NA	0.22778587062173	0.54701952447657	0.280382419625918	0.279603958129883	0.353399967976751	0.00891320103026001	0.0318779501187162	50.0979417879677	23	11.7889679670334	24	6.72917807102203
dgrp21_12_1wf_9100_20s_060614	1	60614	dgrp21	0.51491517616543	0.243218695245138	0.242314338684082	0.014120145035076	0.0582720160587988	86.2918829467755	0.40273848987616	0.472347109782987	0.475258350372314	0.0151772621231042	0.0319347616116886	2.1192207112597	2.10411873713867	0.0693802918523005	0.0329735630540741	0.945528177810478	0.925914696541321	0.0691192264252225	0.0746496698706822	NA	NA	0.0319347616116886	0.942444560273115	0.229220136290505	0.232875823974609	0.485279006779182	0.00741673922955437	0.0318484723015431	51.5388203202208	41	9.97196650505066	42	9.6272457242012
dgrp217_01_1wf_9100_20s_050614	1	50614	dgrp217	0.856150926990926	1.3665790124373	1.29541683197021	0.232428651221037	0.179423831375986	89.8267646987801	0.362066498137314	1.59618937427347	1.52840232849121	0.231159832645085	0.151242790158059	0.63931606256089	0.654277987777713	0.0948129000319983	0.144912257179911	0.172384156589747	0.177795440994811	0.0279460209810285	0.157180751231097	90.9090909090909	NA	0.151242790158059	0.168224579243254	0.229892179369926	0.232989311218262	0.14402562946177	0.00538119227950245	0.0230963053685386	57.3035025652883	11	15.0323691368103	12	2.75870615243912
dgrp217_02_1wf_9100_20s_050614	1	50614	dgrp217	0.736817542993355	0.617123520892599	0.615094184875488	0.0671136852485009	0.10911123352936	81.25	0.398903861227393	0.837552697762199	0.838752746582031	0.0685708846403162	0.0817533950496696	1.20188089298396	1.19224646843192	0.0977949197956258	0.0820257575803506	0.361122459625333	0.363633403722895	0.0371996234266954	0.102299797119418	NA	NA	0.0817533950496696	0.357408263347833	0.220565045873324	0.22367000579834	0.263344678445472	0.00537473133800329	0.0240297366596804	48.8390612752743	23	14.1938409805298	24	5.29356110095978
dgrp217_03_1wf_9100_20s_050614	1	50614	dgrp217	0.761124134923942	0.7096953779459	0.708225250244141	0.098340647520886	0.138855042921706	86.164472993514	0.362985424124118	0.932430526614189	0.931971549987793	0.0978164726012685	0.104956500659864	1.08442914397024	1.08382188779096	0.114960683004826	0.106069718926915	0.320162533945692	0.31592533543039	0.0467639659980108	0.148022208900414	NA	NA	0.104956500659864	0.314533459729502	0.22322294257936	0.223673820495605	0.239399007441251	0.00456126977139054	0.0203925062006984	54.8880252195322	20	14.193907558918	21	4.68768179416656
dgrp217_04_1wf_9100_20s_050614	1	50614	dgrp217	0.913691534237829	NA	NA	NA	0.744508850016791	83.9980003482226	0.354279458820584	NA	NA	NA	0.659761172710719	0.445460310478256	0.489975963245822	0.168901641175019	0.344714136702009	0.117897913118045	0.123701372683886	0.0469303509992216	0.379384237870587	100	NA	0.659761172710719	0.0950006083312088	0.23432765688215	0.233002185821533	0.0868012515796693	0.00610382708857483	0.0261964370293506	54.2392342428431	6	14.7995467185974	7	1.64029359817505
dgrp217_05_1wf_9100_20s_050614	1	50614	dgrp217	0.717445074681876	0.66481278907685	0.624422073364258	0.281634148369035	0.451031698561917	69.8771242968684	0.403342644392948	0.926639282277652	0.876068592071533	0.293758968430545	0.33531503250896	1.16003028147579	1.14146313319534	0.305246800346061	0.267417134613514	0.479158875788895	0.391896563645164	NA	NA	4.76190476190476	NA	0.33531503250896	0.392500512369173	NA	0.242291927337646	0.281597559409376	NA	NA	41.6927002003948	21	13.9610685706139	22	5.74066592752934
dgrp217_06_1wf_9100_20s_050614	1	50614	dgrp217	0.822209007125478	1.0487678249677	0.540542840957642	NA	NA	86.630726722682	0.412779780485297	1.27554893692335	0.764200687408447	NA	NA	1.2101816554933	1.30855679205314	NA	0.314529257278312	0.384735396211058	0.431034566410301	0.139105869291297	0.322725554123848	13.3333333333333	NA	NA	0.214940810515238	0.225423006340861	0.223671913146973	0.176726270404479	0.015281330885374	0.0683202940877641	50.8713143628116	15	15.7315173745155	16	3.60676810145378
dgrp217_07_1wf_9100_20s_050614	1	50614	dgrp217	0.73552099511211	0.568125367164612	0.577816367149353	0.0579916690942039	0.100363493302041	64.3666560126437	0.393125223216088	0.772412168979645	0.773523330688477	0.0569800942397622	0.0736630583450494	1.30131337318146	1.29278582859285	0.091321269261554	0.0706391323618964	0.363383088309121	0.349362973505157	0.0443441816810727	0.126928681755161	NA	NA	0.0736630583450494	0.359580496879735	0.204286801815033	0.205028533935547	0.26447900488789	0.00833945932608162	0.0406746278969308	39.0625	25	14.2031341791153	25	5.10717004537582
dgrp217_08_1wf_9100_20s_050614	1	50614	dgrp217	0.822388757666895	1.0757486479623	1.04382467269897	0.319270853175756	0.305866360056647	76.6262489702452	0.386906552079069	1.30807800803866	1.28613328933716	0.314433455168838	0.244479680120005	0.802843473871538	0.831803116913611	0.166517512370669	0.200188613128223	0.233748134254285	0.240505469622964	0.0648028747343713	0.26944449469678	50	NA	0.244479680120005	0.216588545124694	0.232994834582011	0.233080387115479	0.178119984549977	0.013604837886871	0.0583697240906443	46.9790511824153	14	15.0604810714722	15	3.49492251873016
dgrp217_09_1wf_9100_20s_050614	1	50614	dgrp217	0.830379422614078	1.09504061085837	1.13687372207642	0.192370717482814	0.169210277049471	81.2049153761643	0.46780789754698	1.31872320175171	1.35136413574219	0.188086430613482	0.13918264192366	0.775196763279814	0.777545144958836	0.123464313019371	0.158787324208561	0.211371085856016	0.209693378612013	0.0433791772471505	0.206869561329417	78.5714285714286	NA	0.13918264192366	0.204267241918932	0.223680925369263	0.223671197891235	0.169619314403613	0.00588197239438644	0.0262974064154951	43.2166146435604	14	15.3305685520172	15	3.35521388053894
dgrp217_10_1wf_9100_20s_050614	1	50614	dgrp217	0.921691174754303	NA	0.670870900154114	NA	NA	84.375	0.312566252101089	NA	0.885363817214966	NA	NA	0.963207505827113	1.12947918195442	NA	0.401552798902496	0.25987926504164	0.319723089809945	0.13511612731729	0.422603595497617	28.5714285714286	NA	NA	0.0862556163908697	0.2108438834548	0.214492917060852	0.0795010404004572	0.014435849340378	0.0673022192909174	58.0022224789706	7	NA	8	1.6867510676384
dgrp217_11_1wf_9100_20s_050614	1	50614	dgrp217	0.818373643509129	0.996583779652913	0.913204669952393	0.299968500159698	0.32847893799682	75.5836663902989	0.333333333333333	1.21776133378347	1.12769508361816	0.297388602665105	0.263713664256606	0.859652383552397	0.886764529283519	0.170943660878568	0.192772325948452	0.237834175617761	0.234711082125538	0.0619736872137941	0.264042441680051	33.3333333333333	NA	0.263713664256606	0.221506817005938	0.220750100910664	0.223583698272705	0.181275340895259	0.00955232907276485	0.0427237278324016	50.3891109268659	15	14.9487566947937	16	3.53200161457062
dgrp217_12_1wf_9100_20s_050614	1	50614	dgrp217	0.689522004984866	0.399930392118061	0.400729179382324	0.0256205416411724	0.0639348042502504	86.1180887691778	0.471828402006003	0.580011064515394	0.577724456787109	0.02456202772908	0.0425151254036854	1.72715366509062	1.73093825818494	0.072454686060042	0.0418586195766554	0.452282462793235	0.452405635381326	0.0304149260177107	0.0672293261600829	NA	NA	0.0425151254036854	0.450280038592747	NA	NA	0.310477995015134	0.005293179669637	0.0298917555217002	45.4851285614055	NA	13.5976333320141	34	6.12274286150932
dgrp223_01_1wf_9100_20s_050614	1	50614	dgrp223	0.59817884657877	0.253653863201971	0.251644134521484	0.0803327241191424	0.319231458630656	70.3298589682931	0.310922902858801	0.424043519179458	0.447336673736572	0.082872360294258	0.185257246185588	2.4513568293163	2.38441702557292	0.509450054410898	0.213658118083806	0.75477825496784	0.708378280427228	0.324978739473406	0.458764403783539	NA	NA	0.185257246185588	0.670738774699802	0.170135481401961	0.158443927764893	0.401221746605585	NA	NA	48.4626950602213	46	11.6680777072906	47	7.99636762589216
dgrp223_02_1wf_9100_20s_050614	1	50614	dgrp223	0.491300954031608	0.135264428125487	0.121152877807617	0.0503922382567704	0.415939259295103	70.3819101847201	0.35466186305888	0.275318879427181	0.251653671264648	0.0620922239145041	0.246736809371661	3.76134656010603	3.97395608310405	0.670058302087368	0.168612407403352	1.10476542402446	1.07710718165929	0.282713484308854	0.262474792780912	NA	NA	0.246736809371661	1.03541229015335	0.140054451301694	0.130486488342285	0.508699045968392	NA	NA	45.4201307929645	72	9.7390388250351	72	10.083920493722
dgrp223_03_1wf_9100_20s_050614	1	50614	dgrp223	0.505375606164963	0.16804007756508	0.158483505249023	0.0231708330053693	0.146203435928308	70.3819101847201	0.355808452303809	0.332505319835776	0.326227188110352	0.0222934156383311	0.0683370867016456	3.01959576476901	3.06534843337991	0.194309711740874	0.0633891108837583	0.993875321311162	0.999921751796699	0.125109328315477	0.12511911866171	NA	NA	0.0683370867016456	0.979066402929119	0.164522394289573	0.167739391326904	0.494796276856053	0.00551221158616061	0.03286175979629	45.3394316517091	59	9.91436457633972	60	9.87134365737438
dgrp223_04_1wf_9100_20s_050614	1	50614	dgrp223	0.823158615841209	0.729162312689282	0.68043327331543	0.125885059918475	0.18500720769444	78.6854894500886	0.440806687376109	0.885810217687062	0.829546928405762	0.128679499717984	0.155120217207341	1.14760975517139	1.20547731027323	0.155024463689019	0.128600067680976	0.220226728231259	0.226640761226979	0.035194875180576	0.155289255957487	NA	NA	0.155120217207341	0.21436201438643	0.156304702162743	0.158431053161621	0.176453939051267	0.00442443992059942	0.0279265954010032	44.0003995010273	21	15.3124085664749	22	3.43870344758034
dgrp223_05_1wf_9100_20s_050614	1	50614	dgrp223	0.57366285120107	0.235906873519222	0.232992172241211	0.0367149386941966	0.157580138169563	75.1463416025691	0.417431481552865	0.411229127047894	0.410062789916992	0.0375161082887964	0.0914886920034629	2.4514685836894	2.43871898039398	0.217541344990143	0.0892031212858314	0.757550806950521	0.759982480771828	0.116374159223648	0.153127423549895	NA	NA	0.0914886920034629	0.742529870418382	0.175167900225034	0.177068710327148	0.42596180256617	0.00624604689905266	0.0352747071321217	43.7778928941309	48	11.3235299289227	49	8.58322711102664
dgrp223_06_1wf_9100_20s_050614	1	50614	dgrp223	0.558882151148737	0.207851585352196	0.205049514770508	0.00990864388702494	0.0483231764684483	79.6875	0.508237795922178	0.371905928512789	0.372781753540039	0.0110795177037206	0.0297211910145987	2.69125325594998	2.68253472844023	0.0814390277630131	0.0303589835760919	0.790376015981939	0.782606567806979	0.0393055968218937	0.0502239547158874	NA	NA	0.0297211910145987	0.789285984432642	0.164054343160593	0.167735576629639	0.441117848851263	0.00585422845448264	0.0349015311606125	39.1873006374514	53	11.0161340236664	53	8.69488018751144
dgrp223_07_1wf_9100_20s_050614	1	50614	dgrp223	0.84205480610066	0.952796580160365	0.820128440856934	0.294848235833042	0.359514706653707	68.2826932248379	NA	1.13151373670382	0.99720573425293	0.297840071171057	0.298674647508107	0.925104263430719	1.00280209554668	0.195235570385756	0.194690030318818	0.199511257872963	0.215921631468352	0.045367813031848	0.210112403853792	35.2941176470588	NA	0.298674647508107	0.187476484957161	0.178626953727669	0.17708683013916	0.157865475189035	0.00490910563897686	0.0277214609077318	54.3841061089822	17	16.1975418627262	18	3.21528516709805
dgrp223_08_1wf_9100_20s_050614	1	50614	dgrp223	0.630655899901319	0.268448173999786	0.27025842666626	0.009001379410455	0.0333065633567487	87.5139497808778	0.410808218242863	0.425665048153504	0.428688049316406	0.0101740176957103	0.0237329165390404	2.35046571387184	2.33313975350836	0.055421162921853	0.0237538976559445	0.586308972872422	0.586249969125239	0.0248046801916393	0.0423107573526206	NA	NA	0.0237329165390404	0.585650748936898	0.157216874153718	0.158434867858887	0.369344100098681	0.0038901489104438	0.0245536160254108	51.5625	46	12.3486160039902	46	7.23197621107101
dgrp223_09_1wf_9100_20s_050614	1	50614	dgrp223	0.57410577155148	0.198154918457332	0.195714950561523	0.00687476632823737	0.0351264239574599	75	0.374652874174849	0.345154026098419	0.344826698303223	0.00720211010079919	0.0208861730725561	2.89852493435854	2.90000746728913	0.0608509314434352	0.0209830257783155	0.742683865847514	0.749939884475869	0.0333759879860795	0.0445048845607217	NA	NA	0.0208861730725561	0.741212508183898	0.146874904118735	0.149113178253174	0.425534378894525	0.004576126407282	0.0306889468851128	46.9010344368864	57	11.2948303520679	58	8.51874443888664
dgrp223_10_1wf_9100_20s_050614	1	50614	dgrp223	0.732514884436939	0.527432673507267	0.456658124923706	0.305828087838553	NA	83.3414709568412	0.418806754381818	0.72002997442528	0.661691665649414	0.304553301241507	NA	1.57127194049951	1.51127791373729	0.496939070687051	0.328820441409187	0.450958876990467	0.444434843116834	0.190997607420229	0.429753900663499	3.7037037037037	NA	NA	0.365159973191082	0.192597300918014	0.186398506164551	0.267485115563061	0.0101381118395655	0.0543894478994145	48.4375	27	14.2406821846962	27	5.20012712478638
dgrp223_11_1wf_9100_20s_050614	1	50614	dgrp223	0.745076637579694	0.534676164940551	0.559165954589844	0.128881780745154	0.230489320187047	73.4375	0.445174263387009	0.71761230720828	0.736245155334473	0.121865270217152	0.165522678599887	1.45075195656975	1.35824323291568	0.377964313292533	0.278274394550948	0.384289720880487	0.316675990230724	0.234987523319694	NA	NA	NA	0.165522678599887	0.341760937928637	0.182731427618169	0.177077293395996	0.254638090487951	0.0146257735104673	0.082595420508037	40.7450150325166	27	14.4362564533949	28	5.11647997330874
dgrp223_12_1wf_9100_20s_050614	1	50614	dgrp223	0.826249356646989	0.873989704582426	0.829424858093262	0.210846573144425	0.254208167366883	76.5625	0.448601792403825	1.05777958863311	1.01573944091797	0.212405102656844	0.209113768846944	0.977974247526227	1.01225917748922	0.175082025967453	0.172961658299529	0.219788015614399	0.224732239871682	0.0460712557069583	0.205005101774735	22.2222222222222	NA	0.209113768846944	0.20988513037564	0.18343744309325	0.186390161514282	0.173417453942642	0.00524418151993774	0.0281355060660533	42.2164252690822	18	15.7318146824837	19	3.48531141877174
dgrp229_01_1wf_9100_20s_050614	1	50614	dgrp229	0.529721847184291	0.218900560698611	0.1864013671875	0.105094000388807	0.563804879623517	92.1875	0.287933846183051	0.413236799392294	0.382204532623291	0.103746141038921	0.27144141992993	2.50807722357012	2.61640015919335	0.389584314509829	0.148900890844595	0.997030863953992	1.04883471477328	0.277585511698967	0.264660873433209	NA	NA	0.27144141992993	0.887038902215391	0.194173313056429	0.195741653442383	0.469883885805863	0.0259505344840413	0.132575433116385	NA	47	10.2883263528347	48	9.3203190267086
dgrp229_02_1wf_9100_20s_050614	1	50614	dgrp229	0.58415317416182	0.260326957160776	0.260951042175293	0.0241142984194549	0.0924092819037533	67.1875	0.372093023255814	0.4456484509124	0.44724178314209	0.0256440144095933	0.0573381454421179	2.25127641544263	2.23596995893022	0.130046558906265	0.0581611386981625	0.718628230348917	0.714253344467855	0.079696346079603	0.111579941062761	NA	NA	0.0573381454421179	0.711980089333877	0.185347610215346	0.186389327049255	0.415905429124401	0.00538630300770464	0.0288981300215825	42.1875	44	11.4543861150742	45	8.34064245969057
dgrp229_03_1wf_9100_20s_050614	1	50614	dgrp229	0.378586113346188	0.156011687672657	0.130376815795898	0.0815076267639816	0.625169638224481	70.3819101847201	0.374833684031216	0.412090359822563	0.344850063323975	0.161628658767254	0.468692559338199	2.66280708427846	2.89997538587481	0.732093657283456	0.252448231405458	1.89019995928117	1.69460660348373	0.96717236898091	0.570735630908449	NA	NA	0.468692559338199	1.64140697386218	0.256078672149907	0.205024719238281	0.621413886653812	0.122605483546906	0.598003421257773	44.0003995010273	46	7.1765376329422	46	11.7796189188957
dgrp229_04_1wf_9100_20s_050614	1	50614	dgrp229	0.549985052259239	0.3247809121103	0.317008972167969	0.0850441426785609	0.268270459655949	87.5	0.479379295103098	0.59052679845781	0.549842834472656	0.245434859860193	0.44637275321699	1.83791392169017	1.81870152215238	0.404815441813654	0.22258486996512	1.22766162866751	0.639081881446413	2.38091827458417	NA	NA	6.06060606060606	0.44637275321699	0.81823123354386	0.265745886347511	0.205138921737671	0.450014947740761	0.22950864709805	1.11879620480575	45.5543116784789	33	10.7177700996399	33	8.76961424946785
dgrp229_05_1wf_9100_20s_050614	1	50614	dgrp229	0.592873795913723	0.347932683699059	0.36346435546875	0.0588339570965281	0.161869950137618	70.3125	0.330008291925274	0.586857921697877	0.605677366256714	0.0606374277938199	0.100115063187154	1.72216323901752	1.6510440305543	0.19905728928599	0.120564494708939	0.710785663801536	0.650448071322924	0.149532370980186	0.22989132810565	NA	NA	0.100115063187154	0.686978118911824	0.239022140555522	0.242310523986816	0.407291325068922	0.00905178669337163	0.037356143449486	47.1087919740042	33	11.4817785620689	34	8.12675277888775
dgrp229_06_1wf_9100_20s_050614	1	50614	dgrp229	0.460950382834457	0.193132391635408	0.11182975769043	0.165349833047765	1.47858527517775	75.1463416025691	0.37483249110281	0.418987376575774	0.316875457763672	0.206207060404668	0.650751124305937	2.70919510844612	3.15581398148483	0.917313413538641	0.290674107827813	1.68504360506761	1.83335891532361	0.92094581515251	0.502327071614317	NA	NA	0.650751124305937	1.16943089156547	0.225854984940367	0.205032348632813	0.539049617165543	0.103617221218051	0.505370113101601	46.9790511824153	47	9.07722240686417	47	10.6151842921972
dgrp229_07_1wf_9100_20s_050614	1	50614	dgrp229	0.685308704190131	0.470344405089106	0.466094970703125	0.0270828256729977	0.0581058097068544	84.3894663524424	0.424831037926115	0.686324866754668	0.689652442932129	0.0283947775751103	0.0411725904346643	1.45947918207784	1.4698495913876	0.0604362499358863	0.0411173022668475	0.460710397238806	0.460023658757219	0.0292573856873045	0.0635997412966652	NA	NA	0.0411725904346643	0.459076435197168	0.215924032803239	0.214347839355469	0.314609076929196	0.00573748680463653	0.0267671781618551	48.5382017719033	28	13.169643342495	29	6.26179695129395
dgrp229_08_1wf_9100_20s_050614	1	50614	dgrp229	0.446078229881643	0.209449422501382	0.205036163330078	0.024741144209372	0.120667221857553	89.0762050858702	0.35002958647217	0.469535181210155	0.465988159179688	0.0263681106346743	0.0565853662056391	2.13651678168305	2.14598605875298	0.12202755875775	0.0568631647256177	1.27011103960181	1.27274799289256	0.160883031763345	0.126406038478763	NA	NA	0.0565853662056391	1.24175925434722	0.260085758708772	0.260963439941406	0.553921770118357	0.00975521249922622	0.0373815293874749	57.8968978551528	42	8.79687574505806	42	10.9236018657684
dgrp229_09_1wf_9100_20s_050614	1	50614	dgrp229	0.389684710990045	NA	0.58713436126709	NA	1.37964258784735	67.1875	0.370372726945075	NA	0.904011309146881	NA	NA	0.88096986319636	1.10618085181225	0.44008751232031	0.397844088151878	3.09461322382189	0.476190398843508	NA	NA	11.1111111111111	30	NA	1.44727262189638	NA	0.288993835449219	0.563980013387495	NA	NA	42.3030824083778	9	6.89664429426193	10	11.0903605222702
dgrp229_10_1wf_9100_20s_050614	1	50614	dgrp229	0.554742179326873	0.312480847625171	0.316871643066406	0.0269213343175515	0.0849597460253319	73.7748979815665	0.299519135566061	0.563290226108888	0.568496704101563	0.0279179678615981	0.0491084075952893	1.77958174671437	1.75905465843094	0.0907885896110646	0.0516121481364583	0.808713741065616	0.794098084360375	0.07703139079927	0.097004881785248	NA	NA	0.0491084075952893	0.802714481826588	0.250832901682172	0.251628875732422	0.445299581025723	0.00686362051071246	0.0272767602316481	51.6779043116533	34	10.6243488192558	35	8.77915155887604
dgrp229_11_1wf_9100_20s_050614	1	50614	dgrp229	0.619729883704856	0.418434045438109	0.437935352325439	0.154634707100847	0.353099393049078	83.2888087531528	0.428661979888014	0.675187781710049	0.689562320709229	0.149975003078442	0.217493036632555	1.54963998271741	1.45019524699592	0.332190791614291	0.229066253183786	0.706902340487118	0.583606571356696	0.310285738123361	0.531669370003918	NA	NA	0.217493036632555	0.612463628417755	0.256275633722544	0.260859489440918	0.379562013212789	0.0175891006036603	0.0674274899539127	47.5860630905122	29	12.1345873177052	30	7.68826901167631
dgrp229_12_1wf_9100_20s_050614	1	50614	dgrp229	0.597184566877245	0.406283210825037	0.139800071716309	NA	NA	NA	NA	0.680331062387537	0.419501304626465	NA	NA	2.1802733467423	2.38378281300085	1.02808161706944	0.431281579623118	1.76370958758351	1.67000890821691	1.39653062714736	0.836241423788848	7.40740740740741	NA	NA	0.674524184757703	0.2740478515625	0.260940551757813	0.402815433122755	0.100257977544415	0.384217695827776	NA	27	10.969646692276	27	7.3992919921875
dgrp235_01_1wf_9100_20s_040614	1	40614	dgrp235	0.705673903996274	0.564218255380789	0.568493843078613	0.0778976547452301	0.137024623386217	96.1760283515801	0.41490915244491	0.799545302987099	0.801489591598511	0.0776205353491413	0.0968453441726335	1.26234845399173	1.24769576754203	0.121474537255925	0.097359100203754	0.425023838687142	0.433328177795079	0.0592080809082383	0.136635658473698	NA	NA	0.0968453441726335	0.41691933531122	0.235233500003815	0.232991218566895	0.2942090950006	0.00457123447775744	0.0196197715342005	56.2717139427084	24	13.5412381291389	25	5.88083750009537
dgrp235_02_1wf_9100_20s_040614	1	40614	dgrp235	0.577376313684837	0.247283030880822	0.242306709289551	0.0469100469120304	0.193597804409015	87.5	0.463096557915253	0.428287453121609	0.41938304901123	0.0477829244136742	0.113936232106497	2.36233245869574	NA	0.252637189390085	0.105951754780042	0.757970959584094	0.760009905529086	0.142925372394626	0.188057249457988	NA	NA	0.113936232106497	0.731627687618973	NA	NA	0.422424497267204	0.00687110938834171	0.0388026734058046	NA	45	11.127736389637	46	8.32227915525436
dgrp235_03_1wf_9100_20s_040614	1	40614	dgrp235	0.740307909714748	0.741138806468562	NA	0.287919330601056	0.435129848908832	103.17233762012	0.45458541986835	1.00112236644092	0.922632306814194	0.290359495079399	0.314707704179574	1.05853448132135	1.08385539137791	0.22690014290302	0.209345402263083	0.386321638512309	0.388953013990328	0.103255043967375	0.265469196158338	15.7894736842105	NA	0.314707704179574	0.350855016090092	0.260032267868519	0.260947227478027	0.25974074357459	0.00659400455800848	0.0252694946090727	56.2716972042785	19	14.0816373229027	20	5.20064535737038
dgrp235_04_1wf_9100_20s_040614	1	40614	dgrp235	0.66842723203853	0.408617139793932	0.326187133789063	0.331118906748404	1.01511945888869	90.625	0.35835192876109	0.611311329354066	0.512579917907715	0.337374116317294	0.658188322504735	2.04816458300993	2.06344764614782	NA	0.419354872628205	0.917759388126816	0.678529270957816	NA	NA	6.25	NA	0.658188322504735	0.496907454814049	0.203044902928399	0.205022811889648	0.332146474600665	0.0156418826805107	0.0762933769971403	58.1493564560262	32	13.0757484734058	33	6.70048179663718
dgrp235_05_1wf_9100_20s_040614	1	40614	dgrp235	0.628612223484545	0.441117887143736	0.391426086425781	0.200760265818597	0.512894446182148	106.295945948093	0.455918939386251	0.701732913653056	0.652375221252441	0.213479349044794	0.327233993705268	1.56918009640279	1.53286018141551	0.513288961696546	0.33485699995322	0.755102074496424	0.643043576802256	0.474208947607418	0.737444497876142	NA	NA	0.327233993705268	0.590805846021838	0.26061502650932	0.26096248626709	0.371387776515455	0.0167316078388943	0.0641149924582258	57.8336110103805	27	11.9101829528809	27	7.03660571575165
dgrp235_06_1wf_9100_20s_040614	1	40614	dgrp235	0.760886825062694	0.70518073770735	0.372783660888672	NA	NA	98.4375	0.410771073229505	0.926787945959303	0.587159156799316	NA	NA	1.55266317914631	1.75905318296769	NA	0.430044527168125	0.61127446854243	0.648970786516854	0.389248012973341	0.59979281203474	27.7777777777778	NA	NA	0.315098649253581	0.222201497931229	0.223674774169922	0.2397544108121	0.0102564763802482	0.0458544170584766	58.0022224789706	18	12.6932532787323	19	4.22182846069336
dgrp235_07_1wf_9100_20s_040614	1	40614	dgrp235	0.704292290484346	0.525954692260079	0.447332859039307	0.241259849217582	0.539329593930821	92.5179458942966	0.38826833468589	0.746784679267717	0.661692380905151	0.241158494747577	0.364457112862155	1.4394394140173	1.5112762801229	0.347514672375023	0.229947810963303	0.485015547076763	0.499938998232917	0.164533410479551	0.329106973172948	4.34782608695652	NA	0.364457112862155	0.420091614050451	0.220949155588945	0.223662376403809	0.295867285072858	0.0112516494862119	0.0503064022976208	56.5961571133589	23	12.0969579219818	24	5.30277973413467
dgrp235_08_1wf_9100_20s_040614	1	40614	dgrp235	0.673736784413117	0.530052120486895	0.447345733642578	0.26414243755516	0.590465981209526	90.6384688267074	0.344018265756417	0.786734720071157	0.70828914642334	0.260988227335501	0.368476954155542	1.39157118393581	1.53265181434698	0.421541431832676	0.275040572089939	0.607366948143415	0.634633005190532	0.301750091984005	0.475471791596173	8.33333333333333	NA	0.368476954155542	0.484259169359568	0.256682599584262	0.260856628417969	0.326263215586883	0.00906529730612934	0.0347520297303087	59.4571799701264	24	12.7212508916855	24	6.16038239002228
dgrp235_09_1wf_9100_20s_040614	1	40614	dgrp235	0.595042240705287	0.339455796010566	0.326096534729004	0.0921209667659153	0.282496000279398	NA	NA	0.570473443378102	0.549846649169922	0.0940148136560679	0.170983698451191	1.79462288095082	1.81868890446028	0.264243194669468	0.145293235154962	0.726512299157061	0.69696368327049	0.188980486419711	0.271148254860172	NA	NA	0.170983698451191	0.679107302977094	0.230526910108678	0.223688125610352	0.404097531242815	0.016051074861537	0.0717564905054316	NA	33	11.2020412683487	34	7.83791494369507
dgrp235_10_1wf_9100_20s_040614	1	40614	dgrp235	0.674236120564018	0.480813567285184	0.48463249206543	0.0778622210970303	0.160662403722031	76.9692848830401	0.312745764783786	0.713123418666698	0.717599868774414	0.0778699358626559	0.108514423219795	1.42470937570698	1.39353425706152	0.215222842605675	0.154443883611089	0.506216908053735	0.471965718793495	0.159029740096257	0.336951888164231	NA	NA	0.108514423219795	0.483159933887065	0.232309851381514	0.232989311218262	0.325763879435982	0.00439091554403684	0.0188459956427936	52.8974670174326	27	12.9819663167	27	6.27236598730087
dgrp235_11_1wf_9100_20s_040614	1	40614	dgrp235	0.622300756196174	0.368999700993299	0.410079002380371	0.126767457017474	0.309129353811414	102.324235831431	0.386148211532585	0.592960393056273	0.633757591247559	0.124414646060047	0.196312671876854	1.76429013003459	1.7306547127833	0.402656361480992	0.232661291999387	0.706449431946794	0.631224619494383	0.337418489632387	0.534545832357842	NA	NA	0.196312671876854	0.60768078100396	0.224234026489836	0.223673105239868	0.378160209544646	0.00562281735202686	0.0251385491608252	NA	32	11.8079904317856	33	7.39972287416458
dgrp235_12_1wf_9100_20s_040614	1	40614	dgrp235	0.581814808708667	0.309800981669813	0.316871643066406	0.0580634328755355	0.183239599206948	103.231479119743	0.329734798003045	0.532473524277275	0.540538787841797	0.0602402475058941	0.111444819244914	1.90756741412983	1.8500059986309	0.273848043347959	0.148025489404153	0.760379251379405	0.727281889314501	0.214184938046865	0.294500579752845	NA	NA	0.111444819244914	0.718759964565857	0.222672542607462	0.22367000579834	0.418185191291332	0.00993030440562561	0.0443971214208254	NA	37	11.4626363217831	37	8.2388840764761
dgrp237_01_1wf_9100_20s_060614	1	60614	dgrp237	0.60482442248518	0.270049966194413	0.270272254943848	0.0136964821331288	0.050676611759407	67.3508189445385	0.395033116582161	0.446493157608943	0.44733715057373	0.0144671365999267	0.0323405659050939	2.24202791889024	2.23545513850929	0.073065117711908	0.032684671883253	0.655590908855629	0.65515769119484	0.0357876055073402	0.0546244148367896	NA	NA	0.0323405659050939	0.653372388454608	0.17644319141453	0.177072525024414	0.39517557751482	0.00312997876320838	0.0176762530651033	40.7450150325166	44	11.8821985125542	44	7.7635004222393
dgrp237_03_1wf_9100_20s_060614	1	60614	dgrp237	0.805048478914768	0.831300830841064	0.465887069702148	NA	NA	82.4579675122423	0.562527251425803	1.0326096534729	0.652373313903809	NA	NA	1.71946637160482	2.28291259810805	NA	NA	0.677658745103777	0.807659005037783	NA	NA	30	NA	NA	0.241548339281446	0.200799335132946	0.195727348327637	0.194458123122917	0.00970643322304344	0.0495916043719931	36.0731136894225	10	NA	11	2.2087926864624
dgrp237_04_1wf_9100_20s_060614	1	60614	dgrp237	0.818118862207392	0.991195576531546	0.270281791687012	NA	NA	86.2918829467755	0.431423981753899	1.21155448470797	0.587244987487793	NA	NA	1.72463034332857	2.14601680259509	NA	NA	0.815145312382651	0.956840936351842	NA	NA	21.4285714285714	NA	NA	0.222539296110652	0.220579965909322	0.205031275749207	0.18206359573048	NA	NA	49.0634952128362	14	13.8767380714417	15	3.30869948863983
dgrp237_05_1wf_9100_20s_060614	1	60614	dgrp237	0.846184489418492	1.17559313348361	NA	0.285966928619849	0.239720619776859	73.4541204596447	0.402872638398766	1.38928702686514	NA	0.291398519399001	0.208460585430658	0.752922660264226	0.75035332389228	0.165798303702521	0.220960310860598	0.183072803957106	0.171871507884421	0.0369431529541624	0.214946348053254	NA	NA	0.208460585430658	0.181775384097636	0.213693893381528	0.214351654052734	0.153815510581508	0.00965288425043098	0.0450329356826712	43.8614651488069	14	16.4583038687706	14	2.99171450734138
dgrp237_06_1wf_9100_20s_060614	1	60614	dgrp237	0.681736296236208	0.527852635383606	0.540531158447266	0.0432371817802158	0.0799901746726669	92.3065967983871	0.424223459455116	0.774276854991913	0.782861709594727	0.042630481767988	0.0544546773018916	1.29555522791079	1.27736481136328	0.0770947051051785	0.0603544926393413	0.470214386563339	0.457645491725088	0.0461003300840595	0.10073371401581	NA	NA	0.0544546773018916	0.466543022347879	0.24626596386616	0.242331504821777	0.318059312090289	0.00606455326333685	0.0250258556674132	53.1479729740467	25	13.1963158845901	26	6.40291506052017
dgrp237_07_1wf_9100_20s_060614	1	60614	dgrp237	0.606713066095818	0.333122235536575	0.344839096069336	0.0692406348000618	0.200791138792858	94.5796621901347	0.320850133266069	0.549060592481068	0.549976348876953	0.0630561912092089	0.114652550674168	1.84818924658541	1.81826000707483	0.23824271406361	0.13102785802724	0.697687232251188	0.594628307178299	0.26852618102234	0.451586609283003	NA	NA	0.114652550674168	0.647323494000718	0.215637849436866	0.214262962341309	0.392739621801033	NA	0.0842449955280842	64.2337649721702	35	11.6592782437801	36	7.76296257972717
dgrp237_08_1wf_9100_20s_060614	1	60614	dgrp237	0.752442358499883	0.677207240036556	0.652270317077637	0.126710332008457	0.194260460258497	79.9322222651791	0.447104402057748	0.90001211705662	0.866701602935791	0.130396212091323	0.15045110295127	1.13267020721233	1.15379964293672	0.157557026386971	0.136554927323385	0.339498608451418	0.342931918035543	0.0621736983014522	0.181300412797995	NA	NA	0.15045110295127	0.329064356397362	0.222844764590263	0.223682403564453	0.247601960425878	0.00792916585910329	0.0354483219634151	44.1941738241592	21	14.2213520407677	22	4.90258482098579
dgrp237_09_1wf_9100_20s_060614	1	60614	dgrp237	0.770524280134991	0.629834737628698	0.624290496110916	0.192783740526728	0.308804541680027	78.4679970593107	0.330629327247127	0.817410630484422	0.820133984088898	0.19390514589128	0.236431058404064	1.275120082268	1.24767498310377	0.233094220935125	0.186822869811231	0.317376996640667	0.313491215007576	0.0716232614213751	0.228469756065235	4.16666666666667	NA	0.236431058404064	0.297742559197752	0.187528606653213	0.186404228210449	0.229417871091398	0.00418616169880116	0.0224574396138429	52.5241759811613	24	15.1160337030888	25	4.68821516633034
dgrp237_10_1wf_9100_20s_060614	1	60614	dgrp237	0.710963214804897	0.442227228033927	0.419283866882324	0.129172509172519	0.308078892071401	81.25	0.499630314182397	0.622011404845022	0.605772733688354	0.126670003458801	0.209104828286919	1.6635899036509	1.65078410497502	0.286586599155956	0.173606347609152	0.438323048519175	0.422366831873463	0.119054160424223	0.281873839136806	NA	NA	0.209104828286919	0.406349834347642	0.179698960855603	0.177153587341309	0.288899784563237	0.00885178204995874	0.0499667107102081	40.6550369726803	31	13.7090440690517	32	5.7503667473793
dgrp237_11_1wf_9100_20s_060614	1	60614	dgrp237	0.766043265545393	0.753821604392108	0.745571136474609	0.175488607271492	0.235374733122421	71.9434188250348	0.489344964998805	0.984045729917638	0.978463172912598	0.173621012357145	0.177442562135809	1.04834574100353	1.0220108714192	0.18773413519993	0.183690937591727	0.323867461221259	0.311702319758673	0.0845793427230005	0.271346529562192	17.6470588235294	NA	0.177442562135809	0.304927461770855	0.229860908455319	0.232946634292603	0.233587628569414	0.00759681582426789	0.0326118290883979	36.7382690582037	17	12.8149672746658	18	4.13749635219574
dgrp237_12_1wf_9100_20s_060614	1	60614	dgrp237	0.729877637385826	0.512936733387135	0.465985774993896	0.142179102966826	0.305114685032368	71.9429027076334	0.403627316723435	0.702770857899277	0.652381896972656	0.149028611453987	0.228437686799016	1.46927942769336	1.53284449590102	0.244251171834336	0.159345042819078	0.388548561197052	0.399973189882148	0.0683726511301933	0.170943085336143	NA	NA	0.228437686799016	0.372449691015117	0.191043127860342	0.186393737792969	0.271842700523195	0.0140904967138892	0.0755953331948298	42.9047819304562	27	13.8492918014526	28	5.34920758008957
dgrp239_01_1wf_9100_20s_040614	1	40614	dgrp239	0.667443698830653	0.371974841185978	0.381978988647461	0.0293427193077946	0.0768176265707532	88.0007990020545	0.502528461211939	0.557312686954226	0.559293746948242	0.0274271273429549	0.0490388592624353	1.79889952619181	1.78796921198645	0.0940002329014871	0.0525737424734802	0.501372466145226	0.487813370039023	0.0453865170228328	0.0930407401896387	NA	NA	0.0490388592624353	0.498253713012765	0.185337845768247	0.186392784118652	0.332556301169347	0.00386805065485869	0.0207521480681162	43.7778928941309	35	13.0191194415092	35	6.48682460188866
dgrp239_02_1wf_9100_20s_040614	1	40614	dgrp239	0.776818573568683	0.788737416267395	0.605679035186768	NA	NA	79.82524859028	0.471139445042421	1.01534314845738	0.829308986663818	NA	NA	1.20504104928637	1.20582318060105	0.508677647317582	NA	0.412142635653037	0.369290372153699	0.251371135234893	0.680686944988299	31.5789473684211	NA	NA	0.286524809001378	0.225992837548256	0.223673343658447	0.22257779342049	0.00690761269558145	0.0308825923670613	42.2164252690822	19	14.9860109090805	20	4.51985675096512
dgrp239_03_1wf_9100_20s_040614	1	40614	dgrp239	0.727415866128004	0.675212073326111	0.680329322814941	0.0192041996132756	0.0282277993454935	73.4375	0.488918631937689	0.928233909606934	0.931962013244629	0.0206376900053507	0.0221443467781488	1.07783296035791	1.07309185655485	0.0241760707696125	0.0225293581550693	0.374951685541626	0.37332334606301	0.00934771568255176	0.0250391939886182	NA	NA	0.0221443467781488	0.374637650114976	0.252959864480155	0.251628875732422	0.272517370742545	0.0035352318202404	0.0140493884493595	37.532537967076	20	13.5042414665222	21	5.31215715408325
dgrp239_04_1wf_9100_20s_040614	1	40614	dgrp239	0.769922446813699	0.849833890795708	0.848100662231445	0.0993664529065992	0.117163512931537	79.9322222651791	0.421107483497176	1.10379154980183	1.10903120040894	0.0981057552257195	0.0884607711573351	0.912877782183566	0.901693314925275	0.079251619105623	0.087891989209425	0.303005624752262	0.307670207287096	0.0372706289380348	0.121138244962589	6.25	NA	0.0884607711573351	0.299316510831235	0.254369314979104	0.25163745880127	0.230450500390924	0.00677675223431164	0.0269306178284989	46.2721652967526	16	13.5973422527313	17	4.32427835464478
dgrp239_05_1wf_9100_20s_040614	1	40614	dgrp239	0.683832558688887	0.489781384114866	0.503235816955566	0.0879223064053304	0.174713928227993	75.065075934152	0.394923268540918	0.716229986261438	0.726933479309082	0.0895136702266526	0.123138736589394	1.41956678539952	1.37564169000781	0.194669931883857	0.141512090901194	0.478958761048009	0.450966939496068	0.108775665141549	0.241205409121786	NA	NA	0.123138736589394	0.462346282425191	0.226448602146573	0.223670959472656	0.316167441311113	0.0170140105314918	0.0760671415350716	45.4201307929645	27	13.2240973711014	27	6.11411225795746
dgrp239_06_1wf_9100_20s_040614	1	40614	dgrp239	0.714668747973828	0.612760613361994	0.559177875518799	0.163360347399316	0.292143796368467	89.4044968807498	0.369866833943841	0.857405077666044	0.792168855667114	0.174354265036928	0.220097348929601	1.20101605316589	1.27738348451292	0.202258568699524	0.158338174206665	0.42035648198469	0.45456110050827	0.0861173559062855	0.189451661855783	8.33333333333333	NA	0.220097348929601	0.40129574944828	0.245898229571489	0.242316246032715	0.286793530825421	0.0143914372460442	0.0593911365072125	56.3367386791248	12	NA	13	3.19667698442936
dgrp239_07_1wf_9100_20s_040614	1	40614	dgrp239	0.628842388746008	0.354145439182009	0.363552093505859	0.0457552711809228	0.125856162014331	NA	NA	0.56317043112857	0.577800512313843	0.046494942546179	0.0804688496380641	1.78798640546447	1.73070113073356	0.168436588256068	0.097322746986752	0.602110215877817	0.574599991815689	0.115738979395238	0.201425306376201	NA	NA	0.0804688496380641	0.590223588448177	0.209024991946561	0.205168724060059	0.371157611253992	0.00897681536502337	0.0437533323178225	NA	35	12.3950903713703	35	7.31587471812963
dgrp239_08_1wf_9100_20s_040614	1	40614	dgrp239	0.704188157422596	0.52047762962488	0.559181213378906	0.0999738404929239	0.17878612174544	100.632763675654	0.384192480822925	0.739117271625079	0.773553848266602	0.097922009621245	0.126587192140109	1.37566339039289	1.3085159684157	0.195609522782433	0.149489595468422	0.439297484221771	0.396522073576678	0.104786130657418	0.264263045212677	NA	NA	0.126587192140109	0.420075003334489	0.218639642000198	0.214358329772949	0.295811842577404	0.00930860120594359	0.043425423289141	61.9704125470373	26	13.5324183702469	26	5.68463069200516
dgrp239_10_1wf_9100_20s_040614	1	40614	dgrp239	0.536350209940441	0.235955749045719	0.260853171348572	0.0527864295909136	0.202360697084938	73.4375	NA	0.439928510649638	0.465976715087891	0.0546943819738871	0.11737578338774	2.30286969984661	2.14604315516088	0.315592886310465	0.147058033549566	0.903738400802856	NA	0.221934354032082	0.27242236249492	NA	NA	0.11737578338774	NA	0.203788873222139	0.205028533935547	0.463231794004908	0.00588105115516196	0.028684061882873	53.1479729740467	44	10.3820529580116	45	9.17049929499626
dgrp239_11_1wf_9100_20s_040614	1	40614	dgrp239	0.754438261007056	0.7143610060215	0.717602252960205	0.0526692135474708	0.0733961095163835	89.4044968807498	0.416684847710388	0.946878018975258	0.950597047805786	0.0511311030543969	0.0537884092659663	1.05917299770949	1.06226292584231	0.0571996855577409	0.0538470129816353	0.327482198102255	0.324499885890369	0.0289252738553741	0.0891380093278256	NA	NA	0.0537884092659663	0.325489508797125	0.232517012953758	0.232990264892578	0.245561738992944	0.00691430331366622	0.0296763614430591	52.1509977133707	20	14.28722012043	20	4.65034025907516
dgrp239_12_1wf_9100_20s_040614	1	40614	dgrp239	0.648859726510884	0.39442862233808	0.419368743896484	0.172091103401738	0.410357485879341	73.4375	0.398206994734853	0.607879648285527	0.633730888366699	0.172213382796861	0.271745288036539	1.79652644183909	1.57795685575194	0.596238845902346	NA	0.69526159786412	0.511154318460909	0.428663393225075	NA	NA	NA	0.271745288036539	0.541236660044924	0.213479230180383	0.214350819587708	0.351186671214413	0.00368210954047269	0.017177958766638	44.1941738241592	31	12.2272872924805	32	6.83133536577225
dgrp26_02_1wf_9100_20s_100614	1	100614	dgrp26	0.436375728685173	0.197668526061746	0.214344024658203	0.0740959406676531	0.34568698980906	86.164472993514	NA	0.452977819498195	0.419467449188232	0.179353828605394	0.427575081099821	2.41711450978344	2.38397520936424	0.596310258539856	0.250132743074489	1.65983794427624	0.956107561933945	1.98098472047945	2.07192663184512	NA	NA	0.427575081099821	1.29160316274478	0.25530929343645	0.195799589157104	0.563624271314827	0.180315651988098	0.920919460374443	NA	43	8.49974662065506	43	10.9782996177673
dgrp26_03_1wf_9100_20s_100614	1	100614	dgrp26	0.597025732355948	NA	NA	NA	0.806274672818576	75.0813361045873	0.417298595498396	NA	NA	NA	0.968981097980272	1.38775642166493	NA	1.17992205887242	NA	3.00204966011681	1.07183637335799	NA	NA	45.4545454545455	33.3333333333333	0.968981097980272	0.815590696261211	NA	NA	0.486928632738046	NA	0.820250345656135	43.75	NA	9.72042036056519	NA	8.64860117435455
dgrp26_04_1wf_9100_20s_100614	1	100614	dgrp26	0.682677033706082	0.392779181985294	0.307456493377686	0.299372208591538	0.973705922755656	75.065075934152	0.416800791189055	0.575351392521578	0.48460865020752	0.302768024490967	0.624768097641912	1.95321030804327	2.10386121340956	0.495497282091859	0.235518046025881	0.573144992874803	0.61333837411635	0.181396283728407	0.295752379736143	5.88235294117647	NA	0.624768097641912	0.465098934529251	0.182681179046631	0.18630051612854	0.317512361004288	0.00661304089087295	0.0354966321527001	43.7778928941309	34	13.3544921875	35	6.39384126663208
dgrp26_05_1wf_9100_20s_100614	1	100614	dgrp26	0.57612049932294	0.358353757089184	0.326169967651367	0.123432378843351	0.378429625916032	67.2056661487705	0.463242971067814	0.622011814386614	0.587133407592773	0.121948240748308	0.207701076401514	1.65380000217564	1.70319042838997	0.256902751412349	0.150836187856692	0.802147234932807	0.787931601242937	0.219428399433592	0.278486608593247	NA	NA	0.207701076401514	0.734706480325847	0.263284827582538	0.260951519012451	0.423279464301127	0.0164631349882638	0.0630888643628792	36.0731136894225	31	11.1089664697647	32	8.42511448264122
dgrp26_06_1wf_9100_20s_100614	1	100614	dgrp26	0.582455186754978	0.30069561851652	0.251733064651489	0.157446976455997	0.62545211005147	75.065075934152	0.437602310479044	0.516255370978462	0.465988636016846	0.159226121073795	0.34169528775384	2.04953343182776	2.14600472455207	0.422903400312925	0.197065456321955	0.840751660590335	0.807138473159908	0.340465236332557	0.421817628144588	NA	NA	0.34169528775384	0.718357434922585	0.216006933209988	0.21435546875	0.418411013914661	0.0185658521521934	0.0866124492202554	42.2164252690822	38	11.4264335036278	39	8.42427039518952
dgrp26_07_1wf_9100_20s_100614	1	100614	dgrp26	0.467619935649809	0.239118959558638	0.223578453063965	0.121142181052965	0.541832987002135	73.5869489957288	0.425127920294221	0.511353219418149	0.50325870513916	0.163491293625357	0.324865306761357	2.14493687205438	2.1039182009342	0.63089974800682	0.299868952950111	1.45770503736656	1.18804637688574	1.10114676332599	0.926855032555596	NA	NA	0.324865306761357	1.1312859378944	0.270511916432625	0.214370012283325	0.529011857479711	0.13832559027847	0.645265579850088	42.3030824083778	38	9.08652046322823	39	10.5499647408724
dgrp26_08_1wf_9100_20s_100614	1	100614	dgrp26	0.516410100184639	0.525350987911224	0.307659149169922	NA	NA	82.8714622417625	0.422890159293851	NA	NA	NA	1.00117779984865	1.48582438723606	1.23311143444212	0.907650353203004	NA	1.84301635953519	1.09032210079073	2.01061423038954	1.84405528323364	15.7894736842105	15	1.00117779984865	0.911789934838353	NA	0.232906341552734	0.470857531597219	NA	NA	47.8259363734291	NA	9.98166877031326	NA	9.58019486069679
dgrp26_09_1wf_9100_20s_100614	1	100614	dgrp26	0.410643547720812	0.207970051388991	0.149129867553711	0.197203434102683	1.32236041872469	69.212876514553	0.436829736901087	0.506449090807061	0.400751113891602	0.276823343197973	0.690761257055047	2.29488385850129	2.55471717420276	0.762122247838022	0.298319616564152	1.90044227053533	1.71391925865295	1.1212156168033	0.654182284925438	2.63157894736842	2.56410256410256	0.690761257055047	1.42598185327279	0.296561519304911	0.232982277870178	0.585570247213437	0.188776097767862	0.81025947335381	38.9786338765334	38	7.90286195278168	39	11.5658992528915
dgrp26_10_1wf_9100_20s_100614	1	100614	dgrp26	0.354468915597143	0.115190090703183	0.111928939819336	0.0112906558433879	0.100873427923217	64.7448417346896	0.41281398184352	0.324965280831837	0.326187863945961	0.00982861660490254	0.0301317666635532	3.08004229392817	3.06571798197148	0.0941305206502294	0.0307042334630195	1.83904534996073	1.83325090388157	0.21970883922601	0.119846573516378	NA	NA	0.0301317666635532	1.82112184171463	0.209775190128655	0.205134868621826	0.645531084402857	0.00846446346423324	0.0412629189815496	38.0172658143639	NA	7.02659553289413	NA	12.7962865978479
dgrp26_11_1wf_9100_20s_100614	1	100614	dgrp26	0.596939142056415	0.307296724695908	0.289008140563965	0.0885758397655301	0.306482162034207	66.0883936954894	0.40846288850476	0.514787359457267	0.512582778930664	0.0776330340893262	0.151454627974982	1.98628312138855	2.02465712691373	0.295519254315426	0.145960148208353	0.742955515618664	0.730702023660535	0.254560421766267	0.348377879797045	NA	NA	0.151454627974982	0.665675746060291	0.204559976473833	0.205132961273193	0.397367908740994	0.0243574664415175	0.118739895774617	39.09373750999	38	11.6772755384445	39	7.97783908247948
dgrp26_12_1wf_9100_20s_100614	1	100614	dgrp26	0.343181728639557	0.154828247021545	0.149106979370117	0.0589133881224427	0.395108185889853	72.2983456328705	0.431481353289003	0.451155274598436	0.410042762756348	0.141823156209294	0.345874062636649	2.37644427357453	2.49533808964004	0.56671919909864	0.227111188440357	2.03138576163931	2.00046907915498	0.615486305441372	0.307670991696288	NA	NA	0.345874062636649	1.91390804505883	0.296327027576891	0.251623153686523	0.656818271360443	0.138105347908111	0.548857868939063	41.1029576186435	44	6.81244286894798	44	13.0383892133832
dgrp280_02_1wf_9100_20s_040614	1	40614	dgrp280	0.846901267975374	1.22945389380822	1.28611946105957	0.437102540960537	0.33986154023393	91.1086233569578	0.387867757463356	1.45170864692101	1.50978755950928	0.446558325118168	0.295775602537957	0.788144121155488	0.662344840306558	0.358528944796976	0.541302540578463	0.194923149873756	0.161171975012225	0.0879955280589623	0.545972884257874	NA	NA	0.295775602537957	0.180775183381917	0.222254753112793	0.22367000579834	0.153098732024626	0.0121027336710272	0.0541097749241308	55.7705259299211	13	15.9829006195068	13	2.88931179046631
dgrp280_03_1wf_9100_20s_040614	1	40614	dgrp280	0.857206300183774	1.16294560475009	0.820135712623596	NA	NA	78.6854894500886	0.291222227634522	1.35666945576668	1.01584529876709	NA	NA	1.03822839007179	1.01217367969655	0.405352774115883	0.400477489433836	0.259964671010964	0.240960216197823	0.122236745814017	0.507290156619313	28.5714285714286	NA	NA	0.16616022552472	0.193235303958257	0.195709466934204	0.142433592159747	0.00588154716914191	0.0300524408005221	55.7705259299211	14	16.2812384665012	15	2.89852955937386
dgrp280_04_1wf_9100_20s_040614	1	40614	dgrp280	0.745271358022377	0.584012327094873	0.56849193572998	0.0501098046801878	0.0881451460095799	92.240450894659	0.424059623682129	0.783623737593492	0.773526191711426	0.0490188067964817	0.0633705843728803	1.28065049373832	1.29278582859285	0.0751682948177512	0.0581444297696003	0.344488608628167	0.349999786812203	0.0270219384608364	0.0772055854860716	NA	NA	0.0633705843728803	0.342164435155021	0.199828248023987	0.195729494094849	0.255005353254943	0.00619614049823534	0.0316566520896066	53.125	24	14.0162958502769	25	4.99570620059967
dgrp280_05_1wf_9100_20s_040614	1	40614	dgrp280	0.805203199977449	1.00155753294627	0.894680976867676	0.259292655895462	0.28981576964256	NA	NA	1.24385687112808	1.1556453704834	0.257366635194792	0.222703817077671	0.833341460532703	0.865317359062934	0.158223243503649	0.182849958857859	0.259568115863154	0.280901563524919	0.0670396952880673	0.238659032177727	40	NA	0.222703817077671	0.24425711414614	0.244637552648783	0.25153923034668	0.196676609927729	0.0167811962449111	0.0667140319296623	NA	15	15.023362994194	16	3.91420084238052
dgrp280_06_1wf_9100_20s_040614	1	40614	dgrp280	0.787620657298051	0.695994442836805	0.717604637145996	0.0942936448118816	0.131400551126452	78.8869097585271	0.280109419412345	0.883667075498538	0.903977796435356	0.0948742359610449	0.104951953836877	1.14460737737449	1.11772637781637	0.127975711980086	0.114496458632483	0.272822951125173	0.269223503235185	0.0345150770673668	0.128202317600836	NA	NA	0.104951953836877	0.269566491059457	0.1876167797524	0.186393260955811	0.212316136873779	0.00582736156163085	0.0312637996231655	56.789943266832	22	15.3118777424097	23	4.31518593430519
dgrp280_09_1wf_9100_20s_040614	1	40614	dgrp280	0.803758137805133	0.916069651351256	0.857494354248047	0.156503248483419	0.182512278603467	81.4900300650331	0.364644610797834	1.13973297222572	1.08116340637207	0.159062707518734	0.147121800998132	0.890162693180884	0.924929565786526	0.105397439995741	0.113951855248691	0.248864718901479	0.255103191550458	0.0312934073041263	0.122669603284586	23.5294117647059	NA	0.147121800998132	0.244155829102204	0.223663745241033	0.223670564591885	0.196242234533456	0.005380367763163	0.0240548762997946	51.7751297680653	17	15.5731840729713	18	4.02594741433859
dgrp280_11_1wf_9100_20s_040614	1	40614	dgrp280	0.765955653125529	0.811989568173885	0.643038749694824	0.623253710239293	0.969231963913651	84.4328505381643	0.296534994687987	1.06009997427464	0.88535213470459	0.635043446559424	0.717277817115464	1.06538188872759	1.14138671972796	0.238227371599043	0.20871749029621	0.36129037126647	0.377013362840653	0.0879966352449855	0.233404552512315	6.25	NA	0.717277817115464	0.307164997340137	0.249414773548351	0.25150728225708	0.235274766154966	0.0153026515818228	0.060843771379077	59.3955556523382	16	12.9918330907822	17	4.24005115032196
dgrp287_02_1wf_9100_20s_040614	1	40614	dgrp287	0.629982772275393	0.448385850146965	0.447340965270996	0.0171106851850512	0.038249761397742	105.419548708956	0.336324078069924	0.711743034698345	0.708296775817871	0.0164288356107066	0.0231948473741621	1.40571278319949	1.41183757168074	0.0321195996584589	0.0227502088786472	0.588315231124979	0.595543207014726	0.027926589544774	0.0468926338439177	NA	NA	0.0231948473741621	0.586411432857368	0.262938588857651	0.260950088500977	0.36942910016547	0.00498095451810784	0.019087767115623	69.9644161788691	27	12.106417953968	28	7.36228048801422
dgrp287_03_1wf_9100_20s_040614	1	40614	dgrp287	0.609255927807296	0.388945219914118	0.400824248790741	0.105065600303796	0.262123862567626	89.5545617556694	0.38709961677572	0.638393821318944	0.643142640590668	0.103424032356217	0.160810410986328	1.61212870148236	1.5779711034764	0.288928288572843	0.183101127730609	0.70312733278818	0.619039845626824	0.258347212950644	0.417335353734861	NA	NA	0.160810410986328	0.641526870635132	0.249518809779998	0.251625061035156	0.390854048782119	0.0104411389634	0.0414948293323659	54.8880252195322	30	11.6683565974236	31	7.73508310317993
dgrp287_05_1wf_9100_20s_040614	1	40614	dgrp287	0.514628340243142	0.293145869717453	0.27958869934082	0.100929463233125	0.360992641945416	73.4541204596447	0.337494130479343	0.56962636293787	0.531214714050293	0.144928317933134	0.272824366682382	1.8363121297271	1.88247797651427	0.350825005961863	0.186363405223724	1.1932794887501	0.833344703378268	1.49382059599492	1.79256025740509	NA	NA	0.272824366682382	0.942525758944225	0.276297533336808	0.242309212684631	0.485050466961874	0.144292219224381	0.595487961954544	48.663785944992	33	9.67381370067596	34	9.39411613345146
dgrp287_06_1wf_9100_20s_040614	1	40614	dgrp287	0.654749317262231	0.377452152115958	0.335518836975098	0.147846850202824	0.440651414793135	82.8125	0.358490566037736	0.576483460409301	0.531229496002197	0.151086471104331	0.284409040238432	1.8281429360866	1.95091982877431	0.402040394785354	0.206077353285164	0.588868966667429	0.617644491730108	0.174142840244645	0.281946722712359	NA	NA	0.284409040238432	0.530009190844029	0.200053109725316	0.195725440979004	0.347023155847836	0.00720405674969531	0.0368069511743653	53.125	NA	NA	NA	NA
dgrp287_07_1wf_9100_20s_040614	1	40614	dgrp287	0.566137071501516	0.267540943331835	0.242311477661133	0.104895807570859	0.432896570081393	82.9896914733877	0.440686887968354	0.472572733352824	0.428700923919678	0.145756087052572	0.339994805049408	2.24919489774013	2.33262851606861	0.499572209510551	0.214167067781768	0.919022905931504	0.759842092661074	1.00223137122913	1.31899954070612	NA	2.4390243902439	0.339994805049408	0.766356683457924	0.205031790020989	0.18639087677002	0.433862928498484	0.128295572744645	0.688314658785279	46.4172226045267	41	10.9691786766052	41	8.40630339086056
dgrp287_08_1wf_9100_20s_040614	1	40614	dgrp287	0.59904122899941	0.33018479687827	0.326193690299988	0.0449302953181021	0.137741153965245	116.477012887737	0.384385295156827	0.551188767807824	0.549880981445313	0.0479082085005714	0.0871246871907609	1.8302213220546	1.8185753531093	0.190293589780733	0.104638825911381	0.685247902129596	0.657164451188581	0.133939878075057	0.203814856133509	NA	NA	0.0871246871907609	0.669559834038628	0.221078477799892	0.223668575286865	0.401093945871141	0.00851490409627164	0.0380692910720734	71.7049619098985	35	11.5564678907394	36	7.95882520079613
dgrp287_09_1wf_9100_20s_040614	1	40614	dgrp287	0.537344025992639	0.225897259038428	0.232991933822632	0.0463714368201275	0.199025932182821	95.3637157479196	0.410153017226291	0.420395962570025	0.428722441196442	0.0468885429316971	0.10936806293798	NA	2.33256365424058	0.297972771694956	0.127744754640777	0.905749782872142	0.840061234681097	0.247205520504239	0.294270834432781	NA	NA	0.10936806293798	0.861118447752777	0.194524297054778	0.195711135864258	0.462716853572009	0.00471015821090902	0.024066889143068	56.25	46	10.3912739157677	47	9.14264196157455
dgrp287_10_1wf_9100_20s_040614	1	40614	dgrp287	0.509154866213279	0.266496645437705	0.242312908172607	0.1133484156039	0.467777042744904	82.2059152372869	0.409859426955105	0.523409797533138	0.493942260742188	0.138598353450168	0.280596264919533	2.02168724445984	2.02452812702728	0.461197380742919	0.227804876892533	1.20405296550137	0.961532103809007	0.985494946035965	1.02492152069809	NA	NA	0.280596264919533	0.961676654545765	0.256283602432201	0.232992649078369	0.489642348385683	0.0741089805420281	0.318074329105125	48.5130459258126	37	9.86037588119507	38	9.73877689242363
dgrp287_11_1wf_9100_20s_040614	1	40614	dgrp287	0.561877297548285	0.358952370382124	0.298224449157715	0.236320181154464	0.792423900260059	NA	NA	0.63884476548241	0.56849479675293	0.24486382078596	0.430723064106388	1.732591696157	1.75903105131603	0.494282274097684	0.280996900951739	1.06704132956431	0.906264889946308	0.645630872846009	0.712408568409022	3.2258064516129	NA	0.430723064106388	0.779748006127736	0.279892395100286	0.260950088500977	0.438122702451715	0.0738687375551966	0.283076116124483	NA	31	11.1275234818459	31	8.67666424810886
dgrp287_12_1wf_9100_20s_040614	1	40614	dgrp287	0.58568594652058	0.339061216396444	0.344813108444214	0.0174392514095266	0.0505759525448786	108.095190977675	0.418922136462313	0.57891301372472	0.577897071838379	0.0161366014987772	0.0279229680943775	1.72873394773606	1.73058616159549	0.048919420755125	0.0282675441655123	0.709373935328149	0.702750319450821	0.0401806522076531	0.0571762845146099	NA	NA	0.0279229680943775	0.707399683978693	0.239851797328276	0.2423095703125	0.41431405347942	0.00530718346112443	0.0219024921478747	62.8117226320056	34	11.5280813574791	34	8.15496110916138
dgrp301_01_1wf_11440_20s_250215	1	250215	dgrp301	0.58921551407584	0.625263214111328	0.552103042602539	0.378063111471278	0.684769114274647	67.2054046040942	0.347644438541098	1.06117914273189	0.820514678955078	0.59906477640742	0.73010854256785	1.18440811358418	1.21874723956614	0.567128679569671	0.465337406443326	0.860318649617688	0.592423076549027	0.666183506676992	1.12450634191638	15.3846153846154	7.14285714285714	0.73010854256785	0.70518928512598	NA	NA	0.415508467156279	NA	NA	43.8418194535765	13	8.12842178344727	14	6.17300486564636
dgrp301_02_1wf_11440_20s_250215	1	250215	dgrp301	0.591560814080922	0.414098115903991	0.161037445068359	0.594347765306381	NA	75.7328353225997	0.38114485035556	0.700009375278439	0.513771057128906	0.576682808737037	1.1224509452901	2.03478345068054	2.50780508221226	1.05633728517578	0.421219851841089	1.70795729012989	1.49983765000104	NA	1.2607933865838	10.7142857142857	NA	1.1224509452901	0.690443275140951	0.285911259374448	0.207042694091797	0.408439185919078	NA	NA	46.8676551365651	28	11.5947472453117	28	8.00551526248455
dgrp301_03_1wf_11440_20s_250215	1	250215	dgrp301	0.889019901890707	NA	0.490774154663086	NA	NA	88.9652168940199	0.285362165608236	NA	0.682464599609375	NA	NA	1.43257966275276	1.63007167092972	0.571833176921329	0.350802475203549	0.481361539284686	0.519312448866501	0.240403471759577	0.462926456479724	10	NA	NA	0.124061137865062	0.212624620307576	0.214706897735596	0.110292820613247	0.0136725634396941	0.0636801313040784	63.5779099373359	10	17.1386966109276	11	2.33887082338333
dgrp301_04_1wf_11440_20s_250215	1	250215	dgrp301	0.710133852336328	0.475437897902269	0.168702125549316	0.7775351779617	NA	62.0856519656515	0.296208663507254	0.669504624146682	0.345073699951172	0.779349143395421	NA	2.53248009110723	2.89796369585885	NA	0.395381997063455	1.22603440552385	1.11119198098432	0.677828837428315	0.610001556011841	19.2307692307692	NA	NA	0.406808318920955	0.193412091996935	0.184047937393188	0.288888358677804	0.0203916113874676	0.110795109558355	43.6953439739293	26	12.361385345459	27	5.22212648391724
dgrp301_05_1wf_11440_20s_250215	1	250215	dgrp301	0.417347741352103	0.151661589189812	0.153363227844238	0.0458934810218962	0.299246968566072	50.6439560954711	0.247459128784652	0.363393818062765	0.360404014587402	0.0476277226625368	0.132150921562464	2.7936381776691	2.83474767572945	0.326866476030237	0.115307079649029	1.51990765668715	1.39998631951397	0.468188095863561	0.334423336383816	NA	NA	0.132150921562464	NA	0.211646964604204	0.214706420898438	0.582417625408391	0.011323828530222	0.05274098689195	38.1116468418776	54	8.18972581624985	NA	11.6405830532312
dgrp301_06_1wf_11440_20s_250215	1	250215	dgrp301	0.636434253034231	0.47396052800692	0.475434064865112	0.147693278504908	0.310649340086329	61.6094708385001	0.311308947512444	0.744712475400705	0.736166000366211	0.144580411612487	0.196396480604326	1.39222984654614	1.37268515260934	0.263325027712742	0.191832065213343	0.63445706783583	0.583332124224529	0.229839373364043	0.394011171028147	NA	NA	0.196396480604326	0.571669457090285	0.270948757727941	NA	0.36383002390574	0.01216171757699	0.0440576443945754	42.429891314968	26	12.3229737281799	27	7.3156164586544
dgrp301_07_1wf_11440_20s_250215	1	250215	dgrp301	0.673910603891773	0.458455226251057	0.452433586120605	0.0594304654679324	0.13135732467945	70.8196597916144	0.32963529986314	0.6802908629179	0.674816131591797	0.0596099799384134	0.0883351436750657	1.48048340095959	1.48189142628601	0.121236434969832	0.0818119551940999	0.491297814380559	0.491547253173469	0.0588188973736957	0.119660718260465	NA	NA	0.0883351436750657	0.483917260032883	0.221854396935167	0.222381830215454	0.326116972942412	0.00349079041511931	0.0156972825151105	47.475	28	12.8367463350296	29	6.43377751111984
dgrp301_08_1wf_11440_20s_250215	1	250215	dgrp301	0.56908769322733	0.228172484709292	0.230050086975098	0.0176633126587302	0.0767802911573872	62.0469170225242	0.34373575111619	0.400944331470801	0.406414031982422	0.0183609257562686	0.0451778834178215	2.49944471145786	2.46054496475469	0.128490553500242	0.0522203639196865	0.763169704870563	0.741892260538858	0.0849380387021815	0.114488374148139	NA	NA	0.0451778834178215	0.757198428117362	0.172771846761509	0.168715000152588	0.43091230677267	0.00758356308060942	0.0449489557760173	40.7191733953429	49	11.1804517507553	49	8.46582049131393
dgrp301_09_1wf_11440_20s_250215	1	250215	dgrp301	0.476230122699177	0.140819178837718	0.145681381225586	0.0134089392821226	0.092042917010507	86.2762977474115	0.202739253941207	0.29569565662832	0.291406631469727	0.0353039727132163	0.12115020353229	3.41066885471046	3.43164774242744	0.25521080689186	0.0743697564690402	1.10783082630995	1.05539588723578	0.22548510563446	0.213649786171741	NA	NA	0.12115020353229	1.09966488572488	0.154853906204451	0.145713806152344	0.523693543456737	0.0324769646299519	0.22288186334243	NA	NA	9.29406580328941	NA	10.3752117156982
dgrp301_10_1wf_11440_20s_250215	1	250215	dgrp301	0.783779188481678	0.688320233708336	0.590456008911133	0.404023154660365	0.684256148744137	65.4321172284682	0.430949530303945	0.878206826391674	0.782163619995117	0.399369806363911	0.510596243745528	1.35080503445154	1.27850487345121	0.509810536525022	0.398755254760064	0.367601651550488	0.311662343451702	0.176581730870724	0.566580257707935	19.047619047619	NA	0.510596243745528	0.275991189301311	0.18997031992132	0.184054374694824	0.216316150378675	0.013964705414259	0.0758727166219956	37.2341770420671	21	14.4547249078751	22	4.17934703826904
dgrp301_11_1wf_11440_20s_250215	1	250215	dgrp301	0.79037466861043	0.761849045753479	0.759168148040771	0.401693723892215	0.529123521487155	57.6898850232864	0.192945860962633	0.963908733427525	0.96621298789978	0.401524951083156	0.415565673522911	1.21963774438552	1.10511710652093	0.524331521461621	0.474457881764488	0.358908788492096	0.282830566845739	0.238937733758012	0.844808736278963	20	NA	0.415565673522911	0.265056131600824	0.201932760931197	0.207026481628418	0.209493652177164	0.0113434796271973	0.0547924088646648	46.5588604886331	20	15.2369809150696	21	4.24058797955513
dgrp301_12_1wf_11440_20s_250215	1	250215	dgrp301	0.699686280383077	0.456776760021845	0.375740051269531	0.30827578429942	0.820449625366881	82.9616474824361	0.236844244834252	0.652830808361371	0.559783935546875	0.310218196308001	0.554174881787089	1.77751656892536	1.83664512519968	0.617424670403755	0.336169825042618	0.605755763186961	0.510605617610366	0.3755970335021	0.735591267600802	6.66666666666667	NA	0.554174881787089	0.429211959755022	0.196054048339526	0.191725999116898	0.300313719616923	0.0105623995932582	0.0550911177509013	63.3126587342531	30	13.7033028006554	30	5.88162145018578
dgrp303_01_1wf_11440_20s_240215	1	240215	dgrp303	0.592136214702244	0.417053451904884	0.24540901184082	0.679825906965754	NA	105.513714108641	0.383450597780679	0.704320123562446	0.460105895996094	0.782638988455045	NA	2.00131348463471	2.17341833612375	0.698487089670658	0.321377195573125	0.839915267868003	0.870908957794054	0.284337585007301	0.326483707008257	3.84615384615385	3.7037037037037	NA	0.682360517096515	0.284580809098703	0.207049369812012	0.404050373655796	NA	NA	65.0544173596229	26	10.843389749527	27	7.68368184566498
dgrp303_02_1wf_11440_20s_240215	1	240215	dgrp303	0.722842767524586	0.779996573925018	0.774550437927246	0.423395550988056	0.546633931446858	83.7021335749573	0.2073760108954	1.07906810300691	1.02748775482178	0.454267037277418	0.442114307587259	1.09670512257528	0.995447947589216	0.440314317225486	0.442327816629531	0.575174525791599	0.337088409404831	0.836206445294907	NA	28.5714285714286	6.66666666666667	0.442114307587259	0.377527671514201	0.294470290342967	0.230055034160614	0.272893146894438	NA	NA	66.3443190107488	14	10.9199520349503	15	4.4170543551445
dgrp303_03_1wf_11440_20s_240215	1	240215	dgrp303	0.696366982879808	0.576728602250417	0.506138801574707	0.294652187631145	0.582156884068991	81.0462508509801	0.515695000143517	0.82819636259228	0.743864059448242	0.313308111515088	0.421190011179574	1.32038513614106	1.38727595661852	0.355498793498897	0.256256725133062	0.51480771838644	0.524519262623019	0.189997294265365	0.362231299791023	8.33333333333333	NA	0.421190011179574	0.436024430487106	0.251467760341863	0.245398044586182	0.303633017120192	0.0196158988578604	0.0799350251178201	39.2511045067524	24	13.84148645401	24	6.03522624820471
dgrp303_04_1wf_11440_20s_240215	1	240215	dgrp303	0.711546356055715	0.703886822650307	0.659491539001465	0.287351420705521	0.435716614561272	82.8359772381542	0.411149827589865	0.989235369782699	0.912533760070801	0.310764992307869	0.340551775622808	1.09942884328916	1.09584986743111	0.301048958781154	0.274717338321966	0.465504548753379	0.388186289857702	0.205950841141172	0.530546406511853	15.7894736842105	NA	0.340551775622808	0.404186578113153	0.284501606225967	0.268409729003906	0.287597486823043	0.0772167997462543	0.287682566622354	48.7779794784491	19	13.3738496303558	20	5.69003212451935
dgrp303_05_1wf_11440_20s_240215	1	240215	dgrp303	0.474846082281999	0.162228719170751	0.161036968231201	0.0240601000538262	0.149407308881294	67.526593428071	0.418504443180299	0.341644851298168	0.329746246337891	0.060279893195142	0.182806912480736	2.98869237546726	3.03264374730668	0.380700463025395	0.125534185597467	1.14159283288017	1.04769518665909	0.404530461401898	0.38611465104834	NA	NA	0.182806912480736	1.10594556281108	0.179416132127417	0.168712615966797	0.525153917718001	0.0501531510561646	0.297269713760084	39.2664140455937	NA	9.40926571190357	NA	10.4061356633902
dgrp303_06_1wf_11440_20s_240215	1	240215	dgrp303	0.583575691114917	0.325237715945524	0.276066780090332	0.161057084853006	0.583399005125884	73.9608425317073	0.301491690260401	0.557318820672877	0.521445274353027	0.157730706179042	0.302487555141319	1.93023766365564	1.97580962753459	0.512419404600069	0.259346547085847	0.909414790316428	0.852786717378584	0.507085313593211	0.594621495925688	NA	NA	0.302487555141319	0.713573774962264	0.232081104727352	0.230049133300781	0.416424308885083	0.0328747843219121	0.142903317435799	51.6622631037395	34	11.0580823421478	34	7.89075756072998
dgrp303_07_1wf_11440_20s_240215	1	240215	dgrp303	0.728458299836778	0.588875894745191	0.498454093933105	0.441997445765269	0.886736514244753	103.812	0.237707323316274	0.808386554010212	0.705485343933105	0.445172557916345	0.631016025697278	1.3792064362286	1.41749276727967	0.307596645387274	0.21700050433244	0.439877213494749	0.455745622735015	0.138624547710897	0.304170881288963	4.16666666666667	NA	0.631016025697278	0.375039063314156	0.220851463973522	0.214733600616455	0.273200318434208	0.039035020621277	0.181783477337574	79.135127351891	24	14.1330214738846	25	5.52128659933805
dgrp303_08_1wf_11440_20s_240215	1	240215	dgrp303	0.59577497866566	0.351075034588575	0.345073699951172	0.164134297973202	0.475649978530463	NA	NA	0.589274553582072	0.567496299743652	0.188317070919203	0.331838411993645	1.88714923167144	1.78636244770988	0.635875097506989	0.355960851238326	0.85488034341016	0.724095936054066	0.577004447006743	0.79686187737927	NA	NA	0.331838411993645	0.674472953561966	0.236790615500826	0.199360847473145	0.401834109518945	0.108253093984596	0.54300077149892	NA	32	11.2344011068344	33	7.81409031152725
dgrp303_09_1wf_11440_20s_240215	1	240215	dgrp303	0.413955287750927	0.139619345295018	0.138025283813477	0.023095858073008	0.167330632728269	103.829367449677	0.353306696949497	0.337281221973485	0.329744100570679	0.0401130515730588	0.121649034823174	2.99628911810791	3.03265690367493	0.282424382788338	0.0931277067465495	1.4585060156835	1.38912707762573	0.368774574585411	0.265472166315924	NA	NA	0.121649034823174	NA	0.197661876678467	0.191720008850098	0.586044712249073	0.0322673339934551	0.168304467473107	67.1457565896759	NA	NA	NA	11.4643888473511
dgrp303_10_1wf_11440_20s_240215	1	240215	dgrp303	0.528217441935497	0.231245959467358	0.23005199432373	0.0296112252216195	0.12871535979797	87.539574621996	0.374569429358613	0.437785542673535	0.429449081420898	0.0584118846103864	0.13601585644827	2.31490695777514	2.32856476649419	0.238324221126157	0.102348117842979	0.909167521309525	0.838722456798419	0.272623630338136	0.325046298842167	NA	NA	0.13601585644827	0.893159749393724	0.206539583206177	0.199369013309479	0.471782558064503	0.0556323716600722	0.279042217928393	54.7499261095392	45	10.4060681760311	45	9.29428124427795
dgrp303_11_1wf_11440_20s_240215	1	240215	dgrp303	0.635080364325777	0.670993268489838	0.444752216339111	0.584990405406583	1.31531757215695	89.3337719622316	0.248906672961626	1.05654859791199	0.93557596206665	0.521590840332774	0.557507740131117	1.15223742583546	1.0777185883475	0.540925094768604	0.501916827469793	0.964536348017247	1.1207477541323	0.867371719140675	0.773922335282489	16.6666666666667	NA	0.557507740131117	0.566615931301809	0.380195475722614	0.306735038757324	0.359846652083942	0.134676474051781	0.439064524866137	67.098	18	12.0778788328171	19	7.22371403872967
dgrp303_12_1wf_11440_20s_240215	1	240215	dgrp303	0.601174668013016	0.380705247002263	0.383420944213867	0.0279879195322383	0.0729952809167019	91.8046427257358	0.261711515158294	0.633268943717403	0.628850698471069	0.0280184673439635	0.0445550389179579	1.58213465242813	1.5902025750012	0.0698136418541982	0.0439023574428216	0.665065481911638	0.660022907228213	0.0496772778156024	0.0752659904248229	NA	NA	0.0445550389179579	0.663410075652669	0.25256369671514	0.253060340881348	0.398825331986984	0.00435947841384213	0.0172270313027285	67.7783105794177	31	11.8018626570702	31	7.82947459816933
dgrp306_01_1wf_11440_20s_260115	1	260115	dgrp306	0.653531409632251	0.359972536563873	0.322897911071777	0.132358742229032	0.409908945492093	NA	0.165379066109773	0.550811378394856	0.515079498291016	0.135552386619963	0.26316789363528	1.88566608324396	1.94148382676961	0.312292192504641	0.16085232758506	0.570023913230661	0.581442311575765	0.123652333888854	0.212664836093102	NA	NA	0.26316789363528	0.530148337572193	0.190838841830983	0.192174911499023	0.346468590367749	0.00645266617215023	0.0335770477104293	43.1184062785257	34	12.2390662431717	34	6.48852062225342
dgrp306_01_1wf_9100_20s_041214	1	41214	dgrp306	0.761382118166623	0.735853764745924	0.424301147460938	NA	NA	NA	NA	0.966471036275228	0.63238525390625	NA	NA	1.66794838635186	1.64653491154736	0.818802996906906	NA	0.667447085609856	0.533014134725583	NA	NA	16.6666666666667	NA	NA	0.311192705802709	0.228992324126394	0.199686050415039	0.236936561502069	NA	NA	NA	18	13.2453677654266	19	4.35085415840149
dgrp306_02_1wf_11440_20s_260115	1	260115	dgrp306	0.588053416751926	0.257894984700463	0.253674983978271	0.0572299954854948	0.22560362314006	84.646734540737	0.31840514284385	0.438557072119279	0.430521965026855	0.059528540320316	0.138270623002017	2.31803074123698	2.3227779385317	0.286103743278042	0.123173093102002	0.731653323343415	0.705920558121885	0.155170495957095	0.219812972113928	NA	NA	0.138270623002017	0.700194953661251	0.18057676686181	0.176865100860596	0.411752034892955	0.00840407141757779	0.0475168440618584	57.6947789380282	44	11.3473793268204	45	8.12595450878143
dgrp306_02_1wf_9100_20s_041214	1	41214	dgrp306	0.621155249727339	0.35805786720344	0.332762241363525	0.104200906008011	0.313139211892064	101.754625969781	0.258944716454666	0.576438607514969	0.549089908599854	0.108182395000898	0.197021277037775	1.78284003494061	1.8489539664109	0.278896039720917	0.150839904501406	0.650263723444941	0.674894943685804	0.137021524020764	0.203026449231414	NA	NA	0.197021277037775	0.610499106752067	0.21859400809325	0.216329097747803	0.379214725112897	0.00872337027065615	0.0403245349861621	75.4058032000853	28	10.0256202816963	29	6.33922623470426
dgrp306_03_1wf_11440_20s_260115	1	260115	dgrp306	0.813668631131722	0.85420374903414	0.784164428710938	0.279012583343029	0.355808773169792	82.3462189288831	0.285246903216225	1.04981772229075	0.976349830627441	0.281719036435487	0.2885431303393	1.00114644680096	1.02423805532927	0.197583401495607	0.1929076941318	0.244645900409822	0.254905299413906	0.0556632829604348	0.218368480719778	22.2222222222222	NA	0.2885431303393	0.22831732569368	0.19502951557699	0.192202568054199	0.185774645860832	0.00726650543759159	0.0378064950492363	58.8572149878539	18	15.3756674826145	19	3.70556079596281
dgrp306_03_1wf_9100_20s_041214	1	41214	dgrp306	0.85598856065457	1.1938782291753	0.823640823364258	NA	NA	95.7724557545122	0.428985092121088	1.39473619631359	1.02323055267334	NA	NA	0.89450352257428	0.985221341626695	0.250523571556375	0.254281511140163	0.217862545775097	0.24242575117235	0.0658504024761113	0.271631219693718	35.7142857142857	NA	NA	0.168239911098001	0.20085796713829	0.199675559997559	0.144011439345431	0.00544333654310195	0.0272609053565119	54.6875	14	16.7142952084541	14	2.81201153993607
dgrp306_04_1wf_11440_20s_260115	1	260115	dgrp306	0.73899169934739	0.511515970741	0.507363319396973	0.0635471762516756	0.125249843302044	87.8776370699622	0.335897978592643	0.692180942211832	0.691909790039063	0.0705973200145486	0.102032549663104	1.45836738262388	1.46150940608618	0.135097765875743	0.0924371511487736	0.356756704019307	0.370997511997335	0.043509052415953	0.117275860373601	NA	NA	0.102032549663104	0.352417974560079	0.180267422363676	0.176820755004883	0.260433957900718	NA	NA	58.359716414664	28	14.322447180748	29	5.2277552485466
dgrp306_04_1wf_9100_20s_041214	1	41214	dgrp306	0.865724378628729	NA	0.848598480224609	NA	NA	82.8125	0.377358490566038	NA	1.05660343170166	NA	NA	1.26243290680625	0.946428877662738	NA	NA	0.618157760435851	0.256778242325844	NA	NA	27.2727272727273	NA	NA	0.154336555092433	0.228791117668152	0.224643707275391	0.133612918257095	NA	NA	51.5625	11	16.3065859079361	12	2.74549341201782
dgrp306_05_1wf_11440_20s_260115	1	260115	dgrp306	0.605261561432223	0.244538624235924	0.245998382568359	0.0636998200965873	0.258944060654082	86.7302403836171	0.204330422742438	0.404021401354607	0.407453536987305	0.0656650094556764	0.161159502850806	2.54209325699441	2.45426756482214	0.427003553175451	0.173984108047484	0.700571466476012	0.636325364606826	0.205872267558942	0.323533021013781	NA	NA	0.161159502850806	0.65169014958943	0.159363412608703	0.161428451538086	0.394442997510497	0.00727024011383176	0.045036919109123	69.0086137014793	47	11.4933153390884	48	7.64944380521774
dgrp306_06_1wf_11440_20s_260115	1	260115	dgrp306	0.644863585988863	0.316544134914875	0.315206050872803	0.0469313024244481	0.148890867718103	78.2926581615416	0.319653791423335	0.490869916975498	0.492033004760742	0.0471412029066637	0.0958090259200941	2.05649068931321	2.06465230801947	0.202590642591271	0.0981233701211454	0.564681725327775	0.538473160553202	0.107878506788282	0.200341474173852	NA	NA	0.0958090259200941	0.550314070689478	0.174198691437884	0.17679500579834	0.354877505044945	0.0067794364528468	0.0383463120026123	53.2661131395937	40	12.661765396595	41	7.14214634895325
dgrp306_06_1wf_9100_20s_041214	1	41214	dgrp306	0.765241802840032	0.701232464540572	0.723817825317383	0.0678634003683264	0.0937575699224724	NA	NA	0.916354101328623	0.940130233764648	0.0695157543782799	0.0739426856850584	1.09694291355051	1.06368241769612	0.0862337580622017	0.0810709631254218	0.309855574414187	0.298847924445768	0.029947892527958	0.10021114445917	NA	NA	0.0739426856850584	0.30685355706666	0.215175676074895	0.216312408447266	0.234817169217567	0.00307128045269862	0.0141983554006213	NA	21	14.725881755352	22	4.73386487364769
dgrp306_07_1wf_11440_20s_260115	1	260115	dgrp306	0.60443005967706	0.299251753091812	0.261408805847168	0.188334918536356	0.720461263445216	79.017222812474	0.295316024066278	0.495097403414547	0.453592300415039	0.188354686141965	0.415251065702879	2.21422264667745	2.28185939019905	0.571129656295143	0.250291345184649	0.819908823586374	0.806389750948919	0.356691431222975	0.442331305430455	NA	NA	0.415251065702879	0.654451137877374	0.195845650322735	0.192207098007202	0.39556994032294	0.00777587790636469	0.0404557271140596	55.682170738735	40	11.9700701236725	40	7.83382601290941
dgrp306_07_1wf_9100_20s_041214	1	41214	dgrp306	0.849578315456015	1.1026482462883	0.432620644569397	NA	NA	77.7796780507493	0.366612623870517	1.29787710706393	0.623977959156036	NA	NA	1.47438099280521	1.60262071011699	0.447159461828513	0.279017648409067	0.413505146079201	0.442325356914885	0.135058726397193	0.305337969632119	6.66666666666667	NA	NA	0.17682974381157	0.194981006905437	0.191354751586914	0.150230715869952	0.0103890245490982	0.0542919601574641	49.26466619676	15	16.5397236943245	16	3.11969611048698
dgrp306_08_1wf_11440_20s_260115	1	260115	dgrp306	0.619954484864599	0.343977425779615	0.345949053764343	0.0216288120918083	0.0625202233001093	81.0635528458999	0.396554607720454	0.554843031508582	0.553509712219238	0.0212771943646248	0.0384405077181322	1.80496402680543	1.80665303232098	0.0693850439392993	0.0384052957031607	0.613956719815086	0.613714665929865	0.040171774033922	0.0654567607131501	NA	NA	0.0384405077181322	0.613021640158641	0.210865605728967	0.207599639892578	0.380045515135402	0.005008616220516	0.0241263242224683	48.9174274466677	35	12.0392099022865	35	7.38029620051384
dgrp306_08_1wf_9100_20s_041214	1	41214	dgrp306	0.530760608671678	0.21842817373054	0.199674606323242	0.113792745976775	0.569890924400081	92.6629687698921	0.361682264972877	0.411538027053656	0.399255275726318	0.111669431738361	0.279694317214004	2.55835051857979	2.50466320872233	0.524248655599334	0.209309041540464	1.09010342967299	0.921037902907633	NA	0.639419202028197	NA	NA	0.279694317214004	0.884754368476797	0.193255280906504	0.191437721252441	0.469592767137671	0.00728458733307719	0.0380519956329364	59.1484163460866	43	9.39241147041321	44	8.50323235988617
dgrp306_09_1wf_11440_20s_260115	1	260115	dgrp306	0.682566536634105	0.440262983242671	0.445897102355957	0.105226446925967	0.235988182856513	85.2740971861239	0.275730974870865	0.645011086265246	0.65346622467041	0.106919233122688	0.163618606572382	1.60127487365867	1.5484313024782	0.325283378167059	0.210072850921095	0.507249457879652	0.448327045316497	0.202853571317123	0.45246784336626	NA	NA	0.163618606572382	0.465058637259357	0.204748103022575	0.207537651062012	0.317433463365895	0.0080498651787379	0.0387874929563148	61.761387237761	30	13.2078894972801	30	6.14244309067726
dgrp306_09_1wf_9100_20s_041214	1	41214	dgrp306	0.578002645137625	0.299965207641189	0.299505233764648	0.0182637857921791	0.0609798552185928	83.0480141619894	0.414028301145519	0.518968572487702	0.515848159790039	0.0206592345299701	0.0400490612167324	1.92989941246352	1.93855494300304	0.0768544898240001	0.0396452471473128	0.73246572798957	0.742693428505943	0.0429193840022089	0.0577888296232117	NA	NA	0.0400490612167324	0.729129748697287	0.21871355646535	0.216316223144531	0.421438923395564	0.00556954554154253	0.0257472392064706	48.663785944992	37	11.098712682724	38	8.31111514568329
dgrp306_10_1wf_11440_20s_260115	1	260115	dgrp306	0.741547306373946	0.566442921161652	0.561212539672852	0.100717819773494	0.179464663836994	96.592149603371	0.186093596756799	0.76386619746685	0.761096954345703	0.104271990176687	0.137002243382155	1.3333480325974	1.3138930517199	0.181415187842403	0.138074546938906	0.358907682009245	0.346668430933104	0.0653303601347471	0.188452002851548	NA	NA	0.137002243382155	0.34817539792968	0.197221489479909	0.199867248535156	0.258188528480431	0.00621087378189783	0.0310749951651301	78.6169690652088	25	14.1610730290413	26	5.12775872647762
dgrp306_10_1wf_9100_20s_041214	1	41214	dgrp306	0.819854653900771	1.00722927252452	1.03163719177246	0.450099233633351	0.436296051773815	69.0335063574204	0.373976248290116	1.22854614257813	1.26459884643555	0.46286131456782	0.366014341917566	0.958616893464777	0.790764599239232	0.44146618295905	NA	0.252603414534091	0.223140519355765	0.113379052051731	0.508106068673994	NA	NA	0.366014341917566	0.219728393614794	0.221316870053609	0.232944965362549	0.180145346099229	NA	NA	43.2166146435604	15	15.1084390878677	15	3.31975305080414
dgrp306_11_1wf_11440_20s_260115	1	260115	dgrp306	0.628439201317745	0.31823340685744	0.345957279205322	0.0971265838382378	0.280747334067783	74.7904969899251	0.157835712180169	0.506386944337895	0.530495166778564	0.0965055213524517	0.181915929486186	2.0536863772992	1.88515670296776	0.467224026906293	0.247843601633091	0.66394474403358	0.555607624770857	0.283941261739247	0.51104637352007	NA	NA	0.181915929486186	0.592190863746312	0.188454916079839	0.192186832427979	0.372155953440398	0.00662429922850525	0.0344680181509714	62.9858856332115	38	12.0928694605827	39	7.34974172711372
dgrp306_11_1wf_9100_20s_041214	1	41214	dgrp306	0.767908805089166	0.708832943439484	0.62397289276123	0.372901427018949	0.597624402189606	79.9322222651791	0.413239953703654	0.923069170117378	0.831957817077637	0.374358922482142	0.449973441919361	1.19245332919959	1.30646907624317	0.319044104974772	0.244203334603373	0.352319338994629	0.394121989560626	0.117175260365337	0.297307086305858	10	NA	0.449973441919361	0.302377314195202	0.214335001650311	0.216306865215302	0.232198202029709	0.00543395737091925	0.0251215206022729	46.9010344368864	20	14.1766588687897	21	4.50103503465652
dgrp306_12_1wf_9100_20s_041214	1	41214	dgrp306	0.45084537453166	0.19406779045644	0.199590682983398	0.0119102546781452	0.0596734000811847	88.4014709101107	0.222195260254192	0.430453103035688	0.432622909545898	0.00949579418555412	0.0219493558386017	2.32422268203675	2.3114894855242	0.0523066832986961	0.0226289946920671	NA	NA	0.0791891440102356	0.0650704409732964	NA	NA	0.0219493558386017	NA	0.236385312579248	0.232964515686035	0.54915462546834	0.00533635195750254	0.0229062865723908	68.7590830743853	46	8.92711836099625	46	10.8737243786454
dgrp307_01_1wf_C11440_20s_220316	1	220316	dgrp307	0.863176496010773	1.2537840505441	1.25760555267334	0.363483571075454	0.289028281008129	75.9705492674628	0.286637244847499	1.45252339045207	1.45698976516724	0.361991467024762	0.248451619688085	0.737440306133093	0.716503742495535	0.220812394073799	0.308180377822905	0.175068959497611	0.166634512821412	0.0658838893808518	0.395379614134689	91.6666666666667	NA	0.248451619688085	0.158548521609541	0.19878560763139	0.199376106262207	0.136855357330612	0.0036803762508739	0.0184594649773815	54.1945603358861	12	15.0454086065292	13	2.58421289920807
dgrp307_02_1wf_C11440_20s_220316	1	220316	dgrp307	0.802882548865552	0.962388467043638	0.736152648925781	0.696442509644119	0.9460571943338	NA	NA	1.19866656512022	0.973874092102051	0.696452938418526	0.715136529523311	0.958622152202242	1.03494601965761	0.260533152985049	0.251735982395719	0.299296975908858	0.326305176112486	0.0930357560940892	0.285118848565299	18.75	NA	0.715136529523311	0.246068309639852	0.236813303302316	0.2377028465271	0.197563951638682	0.00455187109357828	0.0191494176871767	NA	16	15.3982154726982	17	4.02582615613937
dgrp307_03_1wf_C11440_20s_220316	1	220316	dgrp307	0.919399161492473	NA	0.337413787841797	NA	NA	71.4477281654218	0.271568640915317	NA	0.559789657592773	NA	NA	1.47531525145727	1.78638527246151	NA	0.429957349917864	0.551556566220886	0.659138958293292	0.290077385729418	0.440085329625356	20	NA	NA	0.0866946002945178	0.227497418721517	0.222402572631836	0.0797069428167048	0.011701977683531	0.0526161974884274	52.0447657310512	5	13.1206221580505	6	1.3649845123291
dgrp307_04_1wf_C11440_20s_220316	1	220316	dgrp307	0.819356108198067	1.36915435574271	1.15792798995972	0.779528858531136	0.673210135077791	NA	NA	1.67101256955754	1.46466302871704	0.776024799729927	0.529831629879863	0.66578813310435	0.682750899280868	0.164723417466458	0.241264299527044	0.255809399773459	0.263148286574859	0.0735868207244131	0.279640128697853	90.9090909090909	NA	0.529831629879863	0.220301912466111	NA	NA	0.180505717626823	0.0103818650346338	0.0338470193058183	NA	11	15.0606979131699	12	3.61952787637711
dgrp307_05_1wf_C11440_20s_220316	1	220316	dgrp307	0.772418963524618	0.866530593070719	0.536778926849365	1.32095364897455	NA	NA	NA	1.1218401333865	0.751476764678955	1.37090494000054	NA	1.26613369194531	1.33071313312956	0.392056302880896	0.294621202060928	0.415050925761559	0.446085146438712	0.13404472736311	0.300491348867466	11.1111111111111	NA	NA	0.26007853780168	0.225366009606255	0.222356796264648	0.200889594603772	0.0195571875059483	0.0879540802641866	NA	18	15.5975506752729	18	4.0565881729126
dgrp307_06_1wf_C11440_20s_220316	1	220316	dgrp307	0.505400672558491	0.178700654368315	0.176365852355957	0.0436801653143236	0.24766792851807	NA	NA	0.353582145951011	0.352742195129395	0.0389925804752272	0.110541299038307	NA	2.83493161240088	0.306730045625247	0.108196629605989	NA	0.954756836370935	0.33996476308072	0.356074709423332	NA	NA	0.110541299038307	0.973951556152724	NA	0.168717384338379	0.492235771518976	0.013393631773404	0.0793850131444773	NA	NA	10.0072366446257	NA	NA
dgrp307_07_1wf_C11440_20s_220316	1	220316	dgrp307	0.599697366479216	0.324975631929733	0.345066070556641	0.0811984264048231	0.235312693229556	64.0112936441688	0.299562875720147	0.5418993814124	0.544497013092041	0.0964359621175553	0.1771101765461	1.90352342088031	1.83662009328688	0.356744052712022	0.194239436896054	0.726632766418051	0.604785829363461	0.318227231947855	0.526181693580338	NA	5.55555555555556	0.1771101765461	0.668571524724197	0.217269453737471	0.207015991210938	0.400940582680095	NA	NA	44.8358864415548	37	12.0240983814001	36	7.82170033454895
dgrp307_08_1wf_C11440_20s_220316	1	220316	dgrp307	0.752520137312637	0.646584653718905	0.567476034164429	0.379672192148868	0.669054143771746	NA	NA	0.859225715909685	0.789816379547119	0.3616034348098	0.457832281241297	1.34189238857414	1.26611706960724	0.486974474004777	0.384620415990316	0.509456151635257	0.436650803020457	0.300949186916622	NA	18.1818181818182	NA	0.457832281241297	0.3741246233407	0.241903240030462	0.245366096496582	0.281536312928382	0.00923585333833008	0.0376411145231662	NA	22	14.2248623818159	22	5.32187128067017
dgrp307_09_1wf_C11440_20s_220316	1	220316	dgrp307	0.653659736536715	0.500750350952148	0.483136177062988	0.0745369204867449	0.154277249407939	NA	NA	0.766071891784668	0.743808746337891	0.0761129791759057	0.102328696120669	1.31521489901932	1.35834880283542	0.112652374294981	0.0829333187910428	0.541025495184912	0.557258852584262	0.0559045834866461	0.100320673646352	NA	NA	0.102328696120669	0.535982509712729	0.268393429842862	0.268386840820313	0.350350186087109	0.0166788295397161	0.0621447366373777	NA	10	NA	11	2.95232772827148
dgrp309_01_1wf_9100_20s_021214	1	21214	dgrp309	0.660033223103938	0.362266155651638	0.374374389648438	0.0379622736509648	0.101401897941293	85.0839638564625	0.327442178826361	0.548860486064638	0.557413578033447	0.0363948162474137	0.0652923030253667	1.83146059689858	1.79400007356835	0.152758012784445	0.0851493904794565	0.522730536797016	0.500041684469409	0.081712214367218	0.163410805349003	NA	NA	0.0652923030253667	0.514795592084311	0.186493020090792	0.183038473129272	0.339782193883108	0.00634212318282166	0.0346491263524826	57.2238853481191	35	12.6793154478073	36	6.71374872326851
dgrp309_02_1wf_9100_20s_021214	1	21214	dgrp309	0.63623948728356	0.370850245157878	0.366053581237793	0.0738271935365285	0.201684117628041	86.164472993514	0.381051161046653	0.582878385529374	0.582376480102539	0.073736495756014	0.126613107285911	1.74377054390924	1.71710231124706	0.230275927972459	0.134107284384946	0.593994292564492	0.577768890405969	0.131312344994002	0.227274862275356	NA	NA	0.126613107285911	0.571415145097105	0.211909446646185	0.208003044128418	0.363556878942643	0.0100918440707444	0.0485177710404748	53.3314005183625	33	12.23805809021	34	7.20492118597031
dgrp309_03_1wf_9100_20s_021214	1	21214	dgrp309	0.64006294314807	0.372912718969233	NA	0.531977241628486	NA	78.824989097684	0.366613244592734	0.582618823603672	0.382700525224209	0.539764933041976	NA	2.4199650261281	NA	NA	0.382996849530849	NA	NA	NA	0.597214261243315	5.88235294117647	NA	NA	0.56234634531664	0.209706104634439	0.19135570526123	0.35993705685193	NA	NA	49.9267040895952	34	12.6790324449539	34	7.13000755757093
dgrp309_04_1wf_9100_20s_021214	1	21214	dgrp309	0.796657709838333	NA	NA	0.128951490886365	0.149036445013304	NA	NA	NA	NA	0.127182021467411	0.114948387302766	0.886398464100464	0.903810035227505	0.093580438023571	0.103539941332932	NA	NA	0.039332854610665	0.146091935998887	17.6470588235294	NA	0.114948387302766	0.254795193697671	0.231558390789562	0.23287296295166	0.202984555489001	0.00979447022359389	0.0420592845964133	NA	17	NA	18	4.16805103421211
dgrp309_05_1wf_9100_20s_021214	1	21214	dgrp309	0.719680443047138	0.612627387046814	0.465805530548096	0.492319117828969	NA	89.7315875960077	0.453219356446346	0.851249180056832	0.69052267074585	0.495103064350249	NA	1.51057973073088	1.48392565767036	NA	0.459672333787007	0.657658546813872	0.54904834257869	NA	NA	18.1818181818182	NA	NA	0.388514241814021	0.238014464792998	0.241260528564453	0.279606101678838	0.0108306050029515	0.0448917403414297	49.0634952128362	22	13.4778025150299	23	5.47433269023895
dgrp309_06_1wf_9100_20s_021214	1	21214	dgrp309	0.672797389690468	0.484695631044882	0.474214315414429	0.0857834567003808	0.18089596604736	90.7461474733225	0.4465963870287	0.720418417895282	0.698847770690918	0.0909792496535777	0.130184646026174	1.40816499360386	1.4309267939874	0.167426683847225	0.117005764760806	0.4998711930698	0.499979833873573	0.0823367163245121	0.164680074567432	NA	NA	0.130184646026174	0.486331569241175	0.235722786850399	0.232956886291504	0.327202610309532	0.0114287318031899	0.0490594289146226	50.2192458749631	27	13.0867820382118	27	6.36451524496078
dgrp309_07_1wf_9100_20s_021214	1	21214	dgrp309	0.645541327156346	0.353121125035816	0.35774040222168	0.0264460749487149	0.0739253234593478	85.9517033717192	0.399823775603807	0.547015520433585	0.549097061157227	0.0256733313335793	0.0467555431447267	1.83223502817088	1.82117481142611	0.0892195054747334	0.0489900831677263	0.554780405643049	0.534904055833693	0.0885096850607504	0.16546833791118	NA	NA	0.0467555431447267	0.549087499022051	0.193894395397769	0.191348552703857	0.354458672843654	0.0200461903574229	0.104762696525056	51.5861688100599	36	12.7123605012894	36	6.98019823431969
dgrp309_08_1wf_9100_20s_021214	1	21214	dgrp309	0.625346897253185	0.374936517079671	0.224630355834961	0.324765073718054	NA	95.2856382276233	0.392698396845194	0.599565647045771	0.524133682250977	0.298671088483279	0.5698376169999	2.07505327627646	2.22589675538297	NA	0.409889291417088	NA	NA	NA	NA	3.33333333333333	NA	0.5698376169999	0.59624832610024	0.223555270702608	0.191450595855713	0.37286204071919	NA	NA	57.8671208532645	30	11.2480955123901	31	6.93021339178085
dgrp309_09_1wf_9100_20s_021214	1	21214	dgrp309	0.794409866507659	NA	NA	0.267022099114148	0.279086769858985	78.1640492288962	0.418081214955913	NA	NA	0.267286789638193	0.221565249041396	0.856911590248152	0.864732917093092	0.198028832685935	0.229005775970266	NA	NA	0.0835212556510428	0.297879021659485	NA	NA	0.221565249041396	0.259142035723391	0.252519253203098	0.249590873718262	0.205864990005542	0.00570692739714728	0.0228651284885891	45.4851285614055	16	NA	17	4.29282730445266
dgrp309_10_1wf_9100_20s_021214	1	21214	dgrp309	0.708384721937308	0.507498468513842	0.507497787475586	0.0990555533808633	0.195184207351108	75.2599661174519	0.332722980547318	0.716416451114195	0.715478897094727	0.101842477626233	0.142341693150943	1.42951969283779	1.39766526177166	0.244030191001745	0.174598451915744	0.434182978522312	0.409839623643134	0.123717987124785	0.301869267849298	NA	NA	0.142341693150943	0.41158938123266	0.208880980632135	0.207991600036621	0.291563629376846	0.00684916609067197	0.032930012988342	50.2192458749631	27	13.7024586498737	28	5.84866745769978
dgrp309_11_1wf_9100_20s_021214	1	21214	dgrp309	0.64279917407917	0.384721478729537	0.382831573486328	0.06061695113345	0.158338432176401	NA	0.289232589788555	0.598509603377545	0.607326507568359	0.0592467831161554	0.0975534286381971	1.68631385267962	1.64656076680045	0.164098234780748	0.0996612078275245	0.564406279633897	0.551168352232575	0.083695782935378	0.151851576013677	NA	NA	0.0975534286381971	0.555695838334783	0.213788124648007	0.216223776340485	0.35720082592083	0.00644807086687269	0.0298212850409152	42.2164252690822	33	12.6958087980747	33	7.05500811338425
dgrp309_12_1wf_9100_20s_021214	1	21214	dgrp309	0.647485537883677	0.398800103895126	0.407665252685547	0.0344365129785926	0.0844725243364199	65.625	0.299336239544659	0.6159212531582	0.62395191192627	0.0258776431480621	0.0414737781124388	1.62624315367521	1.60268761243602	0.0706891849313171	0.0441066520904049	0.551327157344089	0.520872638693191	0.0924291841461496	0.177450642018831	NA	NA	0.0414737781124388	0.544372367968042	0.217095756903291	0.216307640075684	0.352473235482799	0.0120419186600127	0.055670334417219	45.9810592798818	31	12.3628032207489	32	6.9470642209053
dgrp310_01_1wf_11440_20s_280115	1	280115	dgrp310	0.688795335373584	0.598373310433494	0.322916030883789	NA	NA	63.303164920879	0.189546844926653	0.868724394175741	0.599685668945313	NA	NA	1.65849808775345	1.88520584740019	0.686410017388319	0.364103484155282	1.03180327652802	1.02958817590458	0.722041060670406	0.701291135201732	5.55555555555556	NA	NA	0.451019914351078	NA	NA	0.310660413165616	0.0145399742322408	0.0540373782817441	NA	18	10.7707195878029	19	5.12768730521202
dgrp310_01_1wf_9100_20s_041214	1	41214	dgrp310	0.756834302681806	0.660286418416283	0.682227611541748	0.255642524520588	0.374717352677749	40.7450150325166	0.155467410861104	0.872431939298456	0.890095710754395	0.248405791861125	0.279077619249048	1.2528055454574	1.19005848285067	0.392896010651622	0.330148489602359	0.3894300437352	0.35525839497086	0.181569167265808	0.511090433994392	4.54545454545455	NA	0.279077619249048	0.321293176665681	0.212145520882173	0.208057403564453	0.243165697318193	0.0113285676604919	0.0544492407691826	34.4104930399144	22	14.5263012051582	22	4.66720145940781
dgrp310_02_1wf_11440_20s_280115	1	280115	dgrp310	0.52337688639288	0.179651541668072	0.176822662353516	0.0260997113251888	0.147603881639383	57.3555288529362	0.3904935004778	0.343254634162836	0.338279724121094	0.0228345249453192	0.0675019024703508	2.92502221869767	2.9561334265545	0.184946944525979	0.0625638013712873	0.9322700599047	0.913029173655795	0.158243558435629	0.173317088874628	NA	NA	0.0675019024703508	0.910462142543626	0.163565927538378	0.161457061767578	0.476514841343073	0.00668975269540245	0.0414336333274325	34.9585676193977	57	10.2401378750801	58	9.48682379722595
dgrp310_02_1wf_9100_20s_041214	1	41214	dgrp310	0.893866592315256	NA	0.482464969158173	NA	NA	54.7098168750362	0.199816497391595	NA	0.665571212768555	NA	NA	1.23367462823634	1.50246882800164	0.584952020738296	0.389327225854204	0.314084359185297	0.381714985810549	0.153764554741649	0.402825564773515	NA	NA	NA	0.118530450176132	0.186472838123639	0.191265106201172	0.105950409584533	0.00716651548849182	0.0374690168574403	43.7778928941309	11	17.3052681088448	12	2.23767405748367
dgrp310_03_1wf_11440_20s_280115	1	280115	dgrp310	0.531610000537239	0.182620982329051	0.169153213500977	0.0562693783746226	0.332653321861353	NA	NA	0.343524354591704	0.330597877502441	0.0571271392059175	0.17279947360066	2.98307377598845	3.02482280755906	0.454121137745111	0.150131484267527	0.955294606691887	0.95258536974417	0.262975550697981	0.276065074113627	NA	NA	0.17279947360066	0.881856385337108	0.161045479363409	0.161445021629333	0.468803673482828	0.00579701423578123	0.0359070485870464	NA	57	10.4093959927559	58	9.3406378030777
dgrp310_03_1wf_9100_20s_041214	1	41214	dgrp310	0.701911776650655	0.571527543275253	0.557420253753662	0.0711207611680074	0.127589122729361	59.559745476706	0.3133862779528	0.814244129087614	0.790435314178467	0.0743102868878381	0.0940118508812728	1.23734050922773	1.26512566185045	0.110454658865973	0.0873072629832005	0.430280584671094	0.430771835397275	0.0475323038352101	0.110342181009522	NA	NA	0.0940118508812728	0.425181564034693	0.243002974738677	0.241274833679199	0.298439947010695	0.00700015051931625	0.0290131814104727	40.894538525945	23	13.1451334953308	24	5.83207139372826
dgrp310_04_1wf_11440_20s_280115	1	280115	dgrp310	0.498625828783306	0.187023138197569	0.161462306976318	0.0858605153236561	0.531768168878259	53.4911391625254	0.234026890705232	0.375077116750897	0.353640079498291	0.0760366258520068	0.215011335705726	2.75734784598943	2.82773759634106	0.482086733427693	0.170484960857573	1.19491538729206	1.22208976205407	0.47233248569334	0.386495738986841	NA	NA	0.215011335705726	1.00670516042012	0.188277158341458	0.192199230194092	0.501969194954915	0.014971291691041	0.0778946496087536	40.9727741840387	52	9.72520318627357	53	9.97868939209729
dgrp310_04_1wf_9100_20s_041214	1	41214	dgrp310	0.54345205750311	0.250181387577738	0.274547100067139	0.0769717114453237	0.28035885801198	43.8614651488069	0.349931670908888	0.460355948834192	0.49085807800293	0.078674570822378	0.160279670128824	2.242009337491	2.03726852886261	0.492611354733327	0.241799913832836	0.98255992558762	0.774808567306625	0.561895133116825	0.725205111076759	NA	NA	0.160279670128824	0.839885356215016	0.210123683824096	0.208000183105469	0.456437424901783	0.0111262278789519	0.0534914330979711	28.5129493607729	42	10.507618278265	43	9.03531840443611
dgrp310_05_1wf_11440_20s_280115	1	280115	dgrp310	0.504393152241139	0.237200693386357	0.253700256347656	0.0606267032830244	0.23896981483513	58.8257252972654	0.298726652061349	0.470269456142333	0.484331130981445	0.0593661516998275	0.122573478974041	2.16534702736716	2.06470312567686	0.336839463305458	0.163141838221916	1.10596589168011	0.91172811354142	0.603829954396784	0.662291691380812	NA	NA	0.122573478974041	0.982336119259476	0.233010808626811	0.230635643005371	0.495483611753614	0.00701480158428078	0.0304150802229533	41.2529133241327	41	9.72522842884064	42	9.78645396232605
dgrp310_05_1wf_9100_20s_041214	1	41214	dgrp310	0.784684400321348	0.74585802257061	0.723811864852905	0.0932891614863005	0.128885924666707	42.3030824083778	0.260360325180206	0.950519753247499	0.931798577308655	0.0937184387900472	0.100578001589933	1.06178643348319	1.09267300444019	0.105739234680096	0.0967711604939574	0.27744104512374	0.287386519985757	0.0318566765491759	0.110849585258051	NA	NA	0.100578001589933	0.274609996300994	0.204820068819182	0.207978248596191	0.215482180269694	0.00679735775284635	0.0326830223772296	31.2890381164075	20	14.9171604514122	21	4.30122144520283
dgrp310_06_1wf_11440_20s_280115	1	280115	dgrp310	0.662724167260517	0.403612542897463	0.392091989517212	0.0264873267776391	0.0675538584969647	50.6439560954711	0.188333004254514	0.609020408242941	0.599652290344238	0.0262478595423413	0.043771799032525	1.64454292733716	1.66768347959959	0.0677466409681663	0.040623200863291	0.510472638925831	0.519156193304334	0.028909397744276	0.0556853565788612	NA	NA	0.043771799032525	0.509086233295964	0.205473589174675	0.207565069198608	0.337383750024861	0.00401235061934016	0.0193305676857456	41.1060276966773	32	12.9156013727188	33	6.78062844276428
dgrp310_06_1wf_9100_20s_041214	1	41214	dgrp310	0.680599745191194	0.38637387752533	0.37440824508667	0.030225464927101	0.0807286306424802	49.2856410119216	0.270832249268967	0.567696183043368	0.557420253753662	0.0311282870491308	0.0558434804611301	1.76605484298818	1.79400774695118	0.0923221521691995	0.0514614010592185	0.471378828480279	0.47730458389566	0.0314551657804006	0.0659016628829962	NA	NA	0.0558434804611301	0.469424494202281	0.181373362030302	0.183032035827637	0.319490191140577	0.00421686292943657	0.0230389336509792	35.9375	34	13.1367118358612	35	6.34806767106056
dgrp310_07_1wf_11440_20s_280115	1	280115	dgrp310	0.626467356170983	0.324711484344382	0.3690185546875	0.118436468230401	0.320949900014373	61.4107878796552	0.395002397155564	0.518321475406226	0.55352783203125	0.116352111788169	0.210201014393798	2.04073556356404	1.80663279942316	0.580910118189803	0.32154299333837	0.693570920771388	0.545426610095429	0.338164832728953	0.620000613226015	NA	NA	0.210201014393798	0.597353904386778	0.193967672972343	0.192195057868958	0.3742227211796	0.0118698796981061	0.0617595469400633	37.1533794559795	38	12.3390364050865	39	7.56473924592137
dgrp310_07_1wf_9100_20s_041214	1	41214	dgrp310	0.521366102470398	0.21558884927567	0.216302871704102	0.00857350718142474	0.0396365850988476	65.643598555	0.285916661611331	0.413507606754912	0.415968894958496	0.00908296231545372	0.0218356767189527	2.41941342010987	2.40402590703273	0.0532801144717432	0.0221628703400732	0.91946412298616	0.923141363103269	0.0396864367192918	0.042990638601525	NA	NA	0.0218356767189527	0.918198835329089	0.197953430314859	0.199675559997559	0.478717748068385	0.0037914565412507	0.0189880851782615	46.875	47	10.1326759159565	48	9.50176465511322
dgrp310_08_1wf_11440_20s_280115	1	280115	dgrp310	0.659665680769357	0.441386134460055	0.476630687713623	0.168907092340786	0.354377291884049	48.7779794784491	0.298752494962739	0.669105802116723	0.707276821136475	0.171610095788296	0.242634977790658	1.61073425632654	1.41387356423355	0.520924032900959	0.368437494043782	0.630423231124534	0.476209042218021	0.370703721050833	0.778447463584942	NA	NA	0.242634977790658	0.515919395463649	0.227719667656668	0.230634689331055	0.340334319230643	0.009782141251827	0.0424140066708944	34.2054364100211	29	12.8001978993416	29	6.60387036204338
dgrp310_08_1wf_9100_20s_041214	1	41214	dgrp310	0.616726203119216	0.287334179005972	0.291250944137573	0.0286038061623085	0.0982101748957677	55.7273829071819	0.294928040256804	0.465902336486956	0.47413444519043	0.0345010564775246	0.0727663995465838	2.15920797077357	2.10910641516113	0.187714933150859	0.0890021156834411	0.628559207753661	0.600041922953472	0.0924259336706528	0.154032460291645	NA	NA	0.0727663995465838	0.621145793571638	0.178476416638919	0.174711227416992	0.383076886852908	0.0147963659107513	0.0846904124566421	39.2918150777263	41	11.7807013392448	42	7.49600949883461
dgrp310_09_1wf_11440_20s_280115	1	280115	dgrp310	0.718585806808465	0.551161715617547	0.561208724975586	0.0759863543864105	0.135397671142258	NA	NA	0.767008908881018	0.784146964550018	0.0745017113356859	0.0950098829731982	1.31965305676516	1.28785414957431	0.174670562862552	0.135629149403516	0.405061078090018	0.399988091457606	0.0734100629154001	0.18353062124396	NA	NA	0.0950098829731982	0.391622253772881	0.215847193263471	0.222947120666504	0.281414193191535	0.0174528673539239	0.0782825420743193	NA	26	14.3302046060562	26	5.61202702485025
dgrp310_09_1wf_9100_20s_041214	1	41214	dgrp310	0.53570900694453	0.223912582449291	0.232866406440735	0.0457499976359559	0.196464566681066	53.6963758669987	0.330095359826241	0.417974272499914	0.432537078857422	0.0479804280220911	0.110927895820712	2.4238995597219	2.35681331812061	0.298012168912493	0.126447082855988	0.913605931161363	0.846205056984767	0.265859617023263	0.314178714519368	NA	NA	0.110927895820712	0.866418598798412	0.194002025939049	0.19143009185791	0.464148247160568	0.00551528302402952	0.0288109511441036	35.9714513538167	46	10.2999787926674	47	9.11809521913528
dgrp310_10_1wf_11440_20s_280115	1	280115	dgrp310	0.563664884330078	0.284446020921071	0.230634927749634	0.182485403594237	0.791230562407851	43.6035469314137	0.307879664738412	0.504636759941395	0.445914268493652	0.184861712749816	0.41456783469679	2.18803208116991	2.24258354274715	0.631678851178769	0.281674612846292	1.08767023950553	0.964434775673688	0.672413336204692	0.697209757637565	NA	NA	0.41456783469679	0.774103776552466	0.220190739020323	0.215276718139648	0.436335115669922	0.00976381327912007	0.0453547107346107	30.1789015207645	39	11.0933948159218	39	8.5874388217926
dgrp310_10_1wf_9100_20s_041214	1	41214	dgrp310	0.513694372681516	0.205052205671867	0.141441822052002	0.167663054268997	NA	42.2164252690822	0.296778450312275	0.399171601980925	0.341000556945801	0.172841880870405	NA	2.8286866870186	3.00489459989225	0.854507134755735	0.284371749606917	1.42223769533386	1.29332596118835	NA	0.776591987122158	NA	NA	NA	0.946682800475192	0.194119396309058	0.19134521484375	0.486305627318484	NA	NA	29.6875	48	9.8425058722496	48	9.31773102283478
dgrp310_11_1wf_11440_20s_280115	1	280115	dgrp310	0.759621112578674	0.679088771343231	0.684216976165771	0.0838114510854582	0.122492504578186	57.4741691197011	0.340927533381764	0.893983540080842	0.907162189483643	0.0834417311643443	0.0919810505019388	1.13051657376524	1.10233871251755	0.134636808922047	0.122137422366815	0.317262692773847	0.314619959661963	0.0393281703646635	0.125002146738938	NA	NA	0.0919810505019388	0.314411928230771	0.21351361003789	0.215276718139648	0.238833938730664	0.015977791123094	0.0742197821537268	37.879642408555	21	14.2608641982079	22	4.69729942083359
dgrp310_11_1wf_9100_20s_041214	1	41214	dgrp310	0.730306536041365	0.467259841580545	0.432735443115234	0.21346166037812	0.493284439197824	45.3394316517091	0.155146922778723	0.639813309234957	0.599029302597046	0.214018439173977	0.357275409142952	1.72809417970537	1.66936741769489	0.570261221809513	0.341603181998692	0.425286854554048	0.403697141194827	0.18557981895381	0.459700602299404	3.2258064516129	NA	0.357275409142952	0.369288032694478	0.172553467654413	0.174628257751465	0.269693463958635	0.0103183148372657	0.0590873147915782	38.3051583504102	31	14.4850550889969	31	5.3491574972868
dgrp310_12_1wf_11440_20s_280115	1	280115	dgrp310	0.639136642262768	0.402584938208262	0.384381294250488	0.0635394494591993	0.165303177885115	49.8625635622558	0.259766789802395	0.62988868355751	0.60733699798584	0.0658341111272593	0.108397992128901	1.60191712138636	1.6676065656156	0.16049815402484	0.0962446162866906	0.576008763376423	0.599965762600851	0.0798975088320365	0.133170113717291	NA	NA	0.108397992128901	0.564877553957248	0.227411195155113	0.230627000331879	0.361033943125841	0.00497296009413451	0.0215627835725144	36.9099254943708	30	12.0775481462479	31	7.0497470498085
dgrp310_12_1wf_9100_20s_041214	1	41214	dgrp310	0.591522966265691	0.260939887978814	0.266143798828125	0.0331691550210877	0.124628697595574	38.6541152401656	0.222455683964771	0.441132302311334	0.449260711669922	0.0288910015684754	0.0643078747328835	2.27918624020627	2.22591211203264	0.204533298745635	0.0918874099475837	0.704852955824059	0.718675674126716	0.12726898948426	0.177088211088971	NA	NA	0.0643078747328835	0.69079367049801	0.180255622996224	0.183124542236328	0.408620321050547	0.0192891712338142	0.105333621579356	30.0552875963615	44	11.4813550710678	45	8.11150303483009
dgrp313_01_1wf_11440_20s_250215	1	250215	dgrp313	0.677962528221393	0.494467761781481	0.475438117980957	0.157742257547476	0.331782942052186	80.749068706704	0.394204438142251	0.729343792906514	0.705485343933105	0.157582924439063	0.223368105084271	1.43203395973378	1.41746389007171	0.297304748836456	0.209744142985832	0.526687988802208	0.48480823040615	0.184185034163536	0.379913175172861	NA	NA	0.223368105084271	0.47500777457931	0.234876031125033	0.237712860107422	0.322037471778607	0.00752166431222027	0.0316418064585199	48.9174274466677	27	13.3506295681	27	6.3416528403759
dgrp313_02_1wf_11440_20s_250215	1	250215	dgrp313	0.750707735769442	0.569910999536514	0.55213737487793	0.141527633652548	0.256326849244426	71.8085422564753	0.462206208864278	0.75916494846344	0.743827819824219	0.142226428598113	0.191208805058843	1.37805343818488	1.34439714857172	0.365316797967174	0.271732797377088	0.367514302028919	0.342437183825561	0.179045421143339	0.522856248095257	NA	NA	0.191208805058843	0.332759500175643	0.189643299350372	0.191707611083984	0.249805130932628	0.00498849166766973	0.0260213542877249	38.6181881760395	25	14.2477749884129	26	4.93072578310966
dgrp313_03_1wf_11440_20s_250215	1	250215	dgrp313	0.772923585104954	0.71717219835236	0.697819709777832	0.225344846076209	0.322927029601891	58.0982283378762	0.296849445172632	0.92786947141091	0.904860019683838	0.220712725040918	0.243919192184042	1.14027841123725	1.10514331305013	0.274312072387401	0.248214027219978	0.322529252806396	0.307694094848145	0.100808535620546	0.32762583783188	19.047619047619	NA	0.243919192184042	0.293556483969692	0.210530548949133	0.21470832824707	0.226896730020659	0.010074822041205	0.0469232941426083	40.8518014902648	21	15.0606161653996	22	4.63167207688093
dgrp313_04_1wf_11440_20s_250215	1	250215	dgrp313	0.759039987328987	0.596850809951623	0.590458869934082	0.0405753731305993	0.0687183734493294	83.7954296844404	0.417892125356493	0.786323276658853	0.782171249389648	0.0413819132675161	0.0529064617240888	1.2750734099184	1.29115258261054	0.0657699131527001	0.0509389161579356	0.318662963655354	0.320550596804077	0.0189018728433458	0.0589668933135658	NA	NA	0.0529064617240888	0.317604082613863	0.189562253952026	0.191704988479614	0.241074198842861	0.0040559753916442	0.0211573805345994	48.7779794784491	24	14.324419438839	25	4.73905634880066
dgrp313_05_1wf_11440_20s_250215	1	250215	dgrp313	0.645688935636093	0.34742029176818	0.368081092834473	0.0565090065152136	0.15352325239	71.6157747985735	0.474628107908312	0.538061398598883	0.552129745483398	0.0516630040309995	0.0935704052419195	1.87873077550998	1.81118413666238	0.231404969640556	0.127764463566352	0.569868460703072	0.52080604857044	0.151440259721763	0.290780531711279	NA	NA	0.0935704052419195	0.548733368049527	0.190641106830703	0.191707611083984	0.354311064363908	0.0071160547576633	0.0371193126732243	37.6249151095388	36	12.5071305036545	36	6.8630798459053
dgrp313_06_1wf_11440_20s_250215	1	250215	dgrp313	0.665362399059938	0.353156428079347	0.360419750213623	0.037632592482837	0.10441323612408	86.0903271744277	0.433791091099638	0.530773047257114	0.536795616149902	0.0366927558355107	0.0683551704439852	1.89581434724687	1.86290642083177	0.177715149098144	0.0953967129593102	0.511488899656057	0.499990931773253	0.0875843370480733	0.175171851092278	NA	NA	0.0683551704439852	0.502940354629082	0.177616619177767	0.176373481750488	0.334637600940062	0.00436559267573395	0.0247519787691772	48.7451102163079	37	13.0667878389359	37	6.57181490957737
dgrp313_07_1wf_11440_20s_250215	1	250215	dgrp313	0.696316753650988	0.429923032560656	0.429431915283203	0.0242491585037819	0.0564679932738348	62.5774208241279	0.372514662182213	0.617424513063123	0.621132135391235	0.0256568117867303	0.0413065277496385	1.62250052000521	1.60996339268476	0.0711732683339872	0.0442080041430629	0.436958929005273	0.438554080176638	0.0264689616486386	0.0603550687248824	NA	NA	0.0413065277496385	0.435876556553989	0.187393371015787	0.184043884277344	0.303508148852245	0.00506740717305677	0.0275336895488495	39.2664140455937	31	13.3276140093803	32	5.99658787250519
dgrp313_09_1wf_11440_20s_250215	1	250215	dgrp313	0.732084941573132	0.58758573482434	0.59046745300293	0.052407558631736	0.0887560497453463	65.2481465253995	0.370004668551378	0.802619616190592	0.812849044799805	0.053036902450171	0.0652481574401473	1.2513827014432	1.24196629819007	0.0849857094958815	0.0684283539897435	0.369067518110707	0.368418339670251	0.0354637755036658	0.0962595280555448	NA	NA	0.0652481574401473	0.365961711835189	0.215033881366253	0.214713096618652	0.267915058426868	0.00413968279432436	0.0192800665609922	41.1060276966773	24	14.1020576357841	24	5.16081315279007
dgrp313_10_1wf_11440_20s_250215	1	250215	dgrp313	0.574113620390084	0.3148415854999	0.314403057098389	0.012299238875734	0.0391193361452751	45.5803956213634	0.353818425821271	0.548395952156612	0.55211067199707	0.00869306504663956	0.0157451494556253	1.82388024665411	1.81123106420465	0.0294029696581927	0.0162336933366943	0.743654989762309	NA	0.0507478643893753	0.0671227289162983	NA	NA	0.0157451494556253	0.741506404481859	0.233457052045398	0.237714767456055	0.425708926419514	0.00956245417309381	0.0402265886778009	29.4532117943018	35	11.0194554924965	36	8.40445387363434
dgrp313_11_1wf_11440_20s_250215	1	250215	dgrp313	0.671091590899325	0.387475802617915	0.421747207641602	0.0991261182293876	0.2350368098077	74.0637050788036	0.461558128133492	0.577381400501027	0.605810165405273	0.0954723209153782	0.157594451805723	1.78649473759069	1.65070451913531	0.376590412713972	0.228139202594078	0.530419822317485	0.462916178241855	0.185283083281787	0.400251907344193	NA	NA	0.157594451805723	0.49080782671865	0.190176156588963	0.191707849502563	0.329377005258459	0.00534221944444051	0.0278664616931561	39.879	34	13.1741772890091	35	6.65616548061371
dgrp317_01_1wf_11440_20s_260115	1	260115	dgrp317	0.698925683977552	0.491466011319842	0.492722034454346	0.0374721733021726	0.0760513447377493	95.7170516940425	0.410827337719604	0.703173488378525	0.70890998840332	0.0355779721657015	0.0501868682169846	1.42566270719067	1.44121677435494	0.0726646625412946	0.0504189680791206	0.435767008952425	0.422683637970718	0.0531997359752492	0.125861829501275	NA	NA	0.0501868682169846	0.43076728030518	0.211707477058683	0.206155776977539	0.301074316022448	0.0151681321282054	0.0735760712146235	56.3938701722093	28	13.7610483169556	28	5.92780935764313
dgrp317_01_1wf_9100_20s_041214	1	41214	dgrp317	0.709733314560334	0.526293785675712	0.391023635864258	NA	NA	93.3660343853669	0.319386104043463	0.741537384364916	0.62397289276123	NA	NA	1.65982005939496	1.60263372271632	0.530513116818262	0.331025804148868	0.643876965600144	0.553194006116805	0.504051127662178	0.911165200795306	8.69565217391304	NA	NA	0.408979935822064	0.215243598689204	0.208104610443115	0.290266685439666	0.0174868080973969	0.084028931700083	63.5462204130365	23	12.1047570705414	23	4.95060276985168
dgrp317_02_1wf_11440_20s_260115	1	260115	dgrp317	0.703139771988336	0.552340351399921	0.427350997924805	NA	NA	100.664913500186	0.327163778868447	0.785534218663261	0.663668036460876	NA	NA	1.48795122427017	1.50677740234812	0.521279960889303	0.345956848089806	0.594381547590633	0.576488752761599	0.358564945901124	0.621980817810343	14.2857142857143	NA	NA	0.421620719495979	0.232878136363896	0.236293315887451	0.296458296571961	0.0122674624872869	0.0519162484186814	67.731	21	11.5991473793983	22	5.12331900000572
dgrp317_02_1wf_9100_20s_041214	1	41214	dgrp317	0.489980707788008	0.227991918722788	0.208084106445313	0.0655646766117739	0.31508738332692	84.4412794999594	0.352238879490269	0.465307950086537	0.44914436340332	0.0630391807545099	0.140353939381184	2.18278567193461	2.26749776996891	0.273256057422966	0.12050995641187	1.11444204527286	NA	0.277865386434389	0.238238090196361	NA	NA	0.140353939381184	NA	0.23721463371848	0.241180419921875	0.509801377075898	0.00676179489889374	0.0280362514547577	54.6977778261691	42	NA	43	10.2002292498946
dgrp317_03_1wf_11440_20s_260115	1	260115	dgrp317	0.71729625602597	0.501163382615362	0.50782299041748	0.0353410778203766	0.0695933001995888	93.9914414827222	0.379095420880508	0.698683951582227	0.708904266357422	0.0373424843945136	0.0526763431491128	1.43512654839909	1.42065758740103	0.0766813392597773	0.0539759474343562	0.397805518815636	0.392187565378697	0.0289390523307223	0.0737888063910919	NA	NA	0.0526763431491128	0.394124103672715	0.197520568966866	0.196078300476074	0.28270374397403	0.0101458588800359	0.0517439148309729	58.359716414664	28	14.0325747132301	28	5.53057593107224
dgrp317_03_1wf_9100_20s_041214	1	41214	dgrp317	0.624066044016064	0.572854104496184	0.524136543273926	NA	0.703410170340562	90.6384688267074	0.358447277312213	0.917938269497383	0.815328598022461	NA	NA	1.22387771872589	1.22649935550581	0.363683479976	0.296521541852762	0.935682409778612	0.57143688921155	NA	NA	9.52380952380952	NA	NA	0.599444901091817	NA	NA	0.374093208029971	NA	NA	58.1493564560262	21	12.0299361944199	22	7.55467838421464
dgrp317_04_1wf_11440_20s_260115	1	260115	dgrp317	0.662524796553315	0.428371928135554	0.417306900024414	0.0483642572732689	0.115896136082196	97.64832887971	0.441568239609966	0.64657493631045	0.633501052856445	0.0499741493452188	0.0788856610733104	1.55429483193213	1.59111407848017	0.109873112128418	0.069054201464529	0.514261454550744	0.523790545201641	0.0463285322662144	0.0884485844401403	NA	NA	0.0788856610733104	0.509377468137567	0.218203008174896	0.216198921203613	0.337475203446684	0.00502711528796971	0.0232522681426113	54.5299281954415	30	12.8511578440666	30	6.54609024524689
dgrp317_04_1wf_9100_20s_041214	1	41214	dgrp317	0.566898938860729	0.272254198789597	0.274541854858398	0.0175924365142593	0.0640792513160991	96.8875999870468	0.271426568029185	0.480251734703779	0.482538223266602	0.0177933611182772	0.03687451120001	2.08502582126839	2.07243203073736	0.0769075803543027	0.0371098203529209	0.767338617688245	0.757647336719027	0.0582082575186831	0.0768276409057973	NA	NA	0.03687451120001	0.763990766114856	0.20799969391125	0.207991600036621	0.433105554609907	0.00636623848800647	0.0306081519007766	70.5897312379782	40	10.8901679515839	41	8.52798745036125
dgrp317_05_1wf_11440_20s_260115	1	260115	dgrp317	0.62415180657216	0.333511488305198	0.336859703063965	0.0267597095341793	0.0794387375242031	86.088	0.429068856829289	0.534343543979857	0.532962799072266	0.0273070164356596	0.0512362522922673	1.87629522956371	1.87636735840582	0.0950042732546828	0.0506320219380705	0.60583962038549	0.597033602002135	0.0477948100772976	0.0800538025280639	NA	NA	0.0512362522922673	0.602195681482607	0.200839177982227	0.201109886169434	0.375861522507322	0.00261430562767886	0.0129993889284803	49.1503202532801	36	12.0064135789871	37	7.43104958534241
dgrp317_05_1wf_9100_20s_041214	1	41214	dgrp317	0.651323121839497	0.363216207282884	0.366052627563477	0.0469024779537216	0.128130422846339	68.3983278817976	0.360043489190525	0.557659009950502	0.565665721893311	0.0487383727744432	0.0861610857580579	1.80775844386329	1.7678285271608	0.174627638034526	0.098780868931324	0.544977302983304	0.533323144327271	0.0726440230047569	0.136210145345163	NA	NA	0.0861610857580579	0.535734030956627	0.194587282836437	0.191439121961594	0.348935961518328	0.0061493748419196	0.0321218295346825	43.7719552564376	35	12.7125672549009	36	7.00514218211174
dgrp317_06_1wf_11440_20s_260115	1	260115	dgrp317	0.713772064848822	0.479895739719786	0.482669830322266	0.0243464699313316	0.0504412507304965	77.3193370380269	0.417813587614108	0.672337519711462	0.673734664916992	0.026008924212212	0.0386041056910979	1.48960760367801	1.48426383867781	0.0587993822494466	0.039615182097157	0.401144100451159	0.396077871638753	0.0204503857767738	0.051632235075798	NA	NA	0.0386041056910979	0.400561946363695	0.192227971553803	0.191055297851563	0.285909927555878	0.00527461514159038	0.0276077931410644	45.0142674382245	29	13.9169764518738	30	5.76683914661407
dgrp317_06_1wf_9100_20s_041214	1	41214	dgrp317	0.63428402611805	0.295643329620361	0.29941987991333	0.0166759607870222	0.0556942337691445	75.8458268387381	0.32919338894208	0.466105589052526	0.465910911560059	0.0153208581752728	0.0328836646559153	2.14775828416475	2.14633307610589	0.0707147809296845	0.0329467880437192	0.578627285822792	0.571430442970605	0.0407473596405665	0.0713076458242926	NA	NA	0.0328836646559153	0.577591308390377	0.170761017572312	0.166463136672974	0.366356940536641	0.00650806948167279	0.0390961603376384	50.8778820645797	41	12.1213765144348	42	7.17196273803711
dgrp317_07_1wf_11440_20s_260115	1	260115	dgrp317	0.658729397841536	0.379369844089855	0.367034912109375	0.0425062747928851	0.115809895436373	93.7887286244994	0.227016327450239	0.575911512880614	0.568148136138916	0.0442907970382234	0.0779564240749247	1.74596580540464	1.76010433968139	0.127851041657289	0.0726383310210076	0.522970713502425	0.527803171408323	0.0473355666847645	0.0896841270552813	NA	NA	0.0779564240749247	0.51803774898393	0.196527900064693	0.196084976196289	0.341246694447369	0.0049536332415366	0.0252626862987086	72.4971558959384	33	12.5192048549652	34	6.68194860219955
dgrp317_07_1wf_9100_20s_041214	1	41214	dgrp317	0.576666773891404	0.276978628664482	0.299508810043335	0.0656443207317948	0.219173254777704	75.065075934152	NA	0.480309671381625	0.499254703521729	0.0632599491905902	0.12670876958065	2.12137396328311	2.0029856362815	0.33717497559693	0.168336192476591	0.773018596026812	0.667084849112026	0.250466239177694	0.375463840186291	NA	NA	0.12670876958065	0.734103723805521	0.203331042717143	0.199750900268555	0.423333226108596	0.00897671158466794	0.0449395300476705	61.1175225487748	41	11.3561237752438	41	8.33657275140285
dgrp317_08_1wf_11440_20s_260115	1	260115	dgrp317	0.810236448142112	NA	0.211170196533203	NA	NA	98.4716903480386	0.402138798274277	NA	0.457531929016113	NA	NA	1.80505370533292	2.18563981348891	NA	0.508466847627685	1.0667439769998	NA	NA	0.693582194118661	33.3333333333333	NA	NA	0.233215346637984	0.236309234052897	0.236306190490723	0.188959574112192	0.00888816479952629	0.0376129156035599	58.8724031274416	15	NA	16	3.78094774484634
dgrp317_08_1wf_9100_20s_041214	1	41214	dgrp317	0.740812281651422	0.599385437866052	NA	0.127030729801985	0.198271209788493	85.9942994113563	0.399296110034011	0.809092198808988	0.840383529663086	0.120448742134471	0.143325919515295	1.27255503427867	1.18995989495975	0.273802122394731	0.23009357168629	0.385234623934296	0.32426257491198	0.174051679599544	0.536761541620365	NA	NA	0.143325919515295	0.349869629281518	0.209706760942936	0.207991600036621	0.259187718348578	0.0132529443468928	0.0637186518328596	51.6571101713017	24	14.3852505087852	24	5.03296226263046
dgrp317_09_1wf_11440_20s_260115	1	260115	dgrp317	0.643304374726331	0.343565588196119	0.346931457519531	0.0194760384287203	0.056138000768131	93.6861384891063	0.349117853180653	0.534063814414872	0.537975311279297	0.0203882137090351	0.0378980471437476	1.87508070225074	1.8588411315684	0.0724754508109152	0.0389895885022534	0.555340571049231	0.542895156313403	0.0332500979052278	0.0612458916211681	NA	NA	0.0378980471437476	0.554122724006586	0.190377499606158	0.19105339050293	0.356469572488708	0.00247830919341139	0.0129718147732813	60.9786349470042	36	12.3683611750603	37	7.04396748542786
dgrp317_09_1wf_9100_20s_041214	1	41214	dgrp317	0.621964169404135	0.37840986059558	0.324441909790039	0.207910259153266	0.640824298216632	92.2007405745746	0.338860746888679	0.608411029461891	0.540773391723633	0.218825176939197	0.404652263384715	1.82330979165938	1.84920340997669	0.549479158911168	0.297143708445841	0.789423589662331	0.692301361487996	0.448839334588822	0.648329411954515	NA	NA	0.404652263384715	0.606677791905549	0.229572858661413	0.216422080993652	0.37733184893847	NA	NA	60.9575287597849	31	11.730705678463	32	7.34633147716522
dgrp317_10_1wf_11440_20s_260115	1	260115	dgrp317	0.563161477125376	0.202973873526962	0.196087837219238	0.0334064195620519	0.170364567409153	80.6919838026058	NA	0.360418604203948	0.362000942230225	0.0518425395887309	0.143211062571655	2.8177646622	2.7624273878051	0.324713322127252	0.117546373729394	0.79765375208527	0.799952791219167	0.221347487415137	0.276700687646571	NA	NA	0.143211062571655	0.77194477744382	0.156684621626681	NA	0.434729561124481	NA	NA	65.3555257036465	54	10.9605891704559	55	8.61765418946743
dgrp317_10_1wf_9100_20s_041214	1	41214	dgrp317	0.538127407273202	0.234797188308504	0.241178512573242	0.0182320057906928	0.0755954815218292	74.2475273157295	0.515977146994004	0.436322672168414	0.440903186798096	0.0154284270482974	0.0349927773494698	2.29475366163634	2.26807160833232	0.0894502032342446	0.0394388796657157	0.865243705156702	0.85710191917207	0.101420485491404	0.118329551273637	NA	NA	0.0349927773494698	0.858117553618063	0.201483588827693	0.199674606323242	0.461776574264111	0.00601305916175503	0.0301142908078197	35.9375	45	10.5658734738827	46	9.26824508607388
dgrp317_11_1wf_11440_20s_260115	1	260115	dgrp317	0.666055938065451	0.44019315160554	0.427363038063049	0.101153142376736	0.236691368619981	93.2810930682097	0.334112784509333	0.660895168781281	0.643558979034424	0.10207772315098	0.158614402838624	1.5452205785604	1.55385913735579	0.215417815111495	0.13863406915898	0.529910147766735	0.489587367322906	0.138766011608081	0.283434624481555	NA	NA	0.158614402838624	0.500653464141552	0.220384226242701	0.221221923828125	0.333463212704519	0.0140118188296213	0.0633382920967074	62.1146873211159	29	12.7656013965607	30	6.61152678728104
dgrp317_11_1wf_9100_20s_041214	1	41214	dgrp317	0.554310706921563	0.240525314542982	0.232948303222656	0.0430151860294775	0.184655502677617	73.4461794841466	0.41337117478926	0.433917857872115	0.424238204956055	0.0431565203994798	0.101727095521607	2.32537727948696	2.35716630024773	0.217677146244938	0.0923469617829089	0.828271331244975	0.846147063426807	0.144346068444885	0.17059217562051	NA	NA	0.101727095521607	0.803105361894519	0.193167169780835	0.191356658935547	0.445169900884248	0.00693556562846331	0.0362441822878991	43.0856459870021	45	10.8236391544342	46	8.8856898099184
dgrp317_12_1wf_11440_20s_260115	1	260115	dgrp317	0.624334518420372	0.332652104062003	0.331836700439453	0.0119212506757205	0.0359250518701914	91.8240951628669	0.470377696565502	0.532810687616065	0.53294563293457	0.0116007040897274	0.0217671435374189	1.87773262341491	1.87636400075872	0.0410804494096461	0.0218936461118604	0.602213093638149	0.599921797034123	0.0241827463239643	0.0403098311205199	NA	NA	0.0217671435374189	0.601705448755418	0.200158583554062	0.201107978820801	0.375665481579628	0.00340671539043224	0.0169397326272561	48.6320887909461	37	12.3081278502941	37	7.40586759150028
dgrp317_12_1wf_9100_20s_041214	1	41214	dgrp317	0.635729755522545	0.406551318367322	0.399373769760132	0.192132968405966	0.481085596886754	87.5557857882619	0.427821238569757	0.639503365755081	0.62397289276123	0.227357400829091	0.364370637677832	1.74738132879497	1.64629708131192	0.560498579963334	0.340460167442366	0.756678249999437	0.587116264693859	0.552639096196575	0.941277102048499	NA	NA	0.364370637677832	0.571015154716755	0.232146963957817	0.21631383895874	0.363011324707751	NA	NA	50.0975610683794	30	12.1965395510197	31	7.19655588269234
dgrp320_01_1wf_11440_20s_270115	1	270115	dgrp320	0.655613349492743	0.386725416689208	0.392050743103027	0.0555777746406149	0.141761686767189	51.3705923072725	0.322277621566935	0.58986812423576	0.591942310333252	0.0525651542003329	0.0888011437647357	1.70876517747085	1.68935381462599	0.154148085101973	0.0912467736287086	0.535581308484329	0.509855386224595	0.0921515526180527	0.18074056900805	NA	NA	0.0888011437647357	0.525043340626217	0.203047604683568	0.199884176254272	0.344225423176813	0.0160391282439609	0.0802421109290689	34.815	33	12.7619387507439	34	6.90361855924129
dgrp320_01_1wf_9100_20s_041214	1	41214	dgrp320	0.749034883947617	0.605257295072079	0.5906982421875	0.0890938288314807	0.150827990449988	72.2983456328705	0.285500799235221	0.808049542208513	0.798585414886475	0.0874194976140919	0.109467936659624	1.25097590081192	1.26520885594074	0.127428473854265	0.100717342639462	0.340419180622979	0.33804113174462	0.0422284296215452	0.124920980484255	NA	NA	0.109467936659624	0.335051305928141	0.202792247136434	0.199737787246704	0.250965116052382	0.00559071613891397	0.02799027773352	51.6571101713017	24	14.5261750817299	24	4.86701393127441
dgrp320_02_1wf_11440_20s_270115	1	270115	dgrp320	0.552257190073923	0.268114238977432	0.269071578979492	0.00815475431897326	0.0303070073394663	70.7857043830179	0.246227666395458	0.485488000512123	0.484336853027344	0.00859344235089482	0.0177426976642012	2.06041854678484	2.06468229013477	0.0364902820247967	0.0176735579121061	0.811525085668899	0.800181480805392	0.0308098506637903	0.0385035787541344	NA	NA	0.0177426976642012	0.810558375407721	0.217322241969225	0.215266704559326	0.447636690793552	0.00397841985088865	0.0184813525112158	53.3563055786287	40	10.7245695590973	41	8.91021192073822
dgrp320_02_1wf_9100_20s_041214	1	41214	dgrp320	0.618709224693665	0.371865145184777	0.374382972717285	0.0355976383482218	0.0950834865428115	60.9375	0.179086636226558	0.601033781852686	0.599090576171875	0.0357069450909996	0.0596019141532206	1.6700613825871	1.66919667872243	0.106058195999312	0.0635384657489772	0.621401679396207	0.608718296311432	0.0697131040375955	0.114524410486799	NA	NA	0.0596019141532206	0.61626812739881	0.229168636667909	0.232874870300293	0.381290775306335	0.00555280351100585	0.0238445801551944	50.0244081049441	33	12.2715497910976	33	7.562565010041
dgrp320_03_1wf_11440_20s_270115	1	270115	dgrp320	0.434569489288383	0.171954173822792	0.169139862060547	0.0111952475438892	0.0661892909660861	62.0372295077722	0.265060991527958	0.395688556286753	0.399744987487793	0.00849671935532357	0.0212553493383905	2.52814469273761	2.50159484496485	0.0548086734754956	0.0219094924926845	1.3089163554874	1.36335960491154	0.141038766479776	0.103449424474423	NA	NA	0.0212553493383905	1.30193075149771	0.223872426748276	0.230627059936523	0.565779381767201	0.0122905854233306	0.0532920353175962	45.5935799427946	49	8.42575451731682	50	11.1936213374138
dgrp320_03_1wf_9100_20s_041214	1	41214	dgrp320	0.663610335567754	0.406596723102754	0.415987014770508	0.0575730684884534	0.138401119371996	77.1244416826779	0.390749003204136	0.612704024199517	0.615657806396484	0.0560103587652075	0.090976445329334	1.64765965617199	1.62427892509496	0.175017704096236	0.107751015784438	0.520115330913041	0.499989683489457	0.10535788070204	0.210720109196536	NA	NA	0.090976445329334	0.507052872570543	0.206166036427021	0.207982778549194	0.336485526917131	0.0079230476933311	0.0380947295184686	46.988142972496	31	12.6044984161854	32	6.59731316566467
dgrp320_04_1wf_11440_20s_270115	1	270115	dgrp320	0.615384897535718	0.304360259801914	0.307500839233398	0.00738433417736787	0.0240140293463168	67.2888229946103	0.365309635800984	0.494585195413003	0.492039680480957	0.00706870700257106	0.0143661320072023	2.02225360891795	2.03235641284566	0.0286442142323447	0.014094090018511	0.625320764374791	0.625015117732247	0.0182070383737649	0.0291305567772917	NA	NA	0.0143661320072023	0.625162245028337	0.190274543315172	0.192194938659668	0.384715404099962	0.0038432412754	0.0199965790056807	42.7075675729724	39	11.8700501322746	40	7.61098173260689
dgrp320_04_1wf_9100_20s_041214	1	41214	dgrp320	0.518144136397902	0.222053751680586	0.216328620910645	0.0245204071202254	0.113347956534857	63.1992138004896	0.327450568072273	0.428555948204464	0.424408435821533	0.0217783287743085	0.0513145520591548	2.33926530744657	2.35622083727975	0.118599084508717	0.0503344519462104	0.943048982182272	0.925865860596232	0.129137579541111	0.13947763389607	NA	NA	0.0513145520591548	0.929294989953493	0.206353438937146	0.207981109619141	0.481508750028349	0.00766645582405484	0.0368613084048538	42.5045953397983	45	9.99241882562637	46	9.4922581911087
dgrp320_05_1wf_11440_20s_270115	1	270115	dgrp320	0.543437412380941	0.249408976283184	0.246039390563965	0.046346974462679	0.188372172262513	NA	NA	0.458947011377922	0.453581809997559	0.0415495284519865	0.0916031629491714	2.19610231937019	2.20467394846672	0.192456162512763	0.0872946145377234	0.879855758888928	0.862030763439756	0.190359633282898	0.220826960424599	NA	NA	0.0916031629491714	0.840138307038412	0.209538035094738	0.199886322021484	0.456562587619059	0.0189756375931295	0.0949321464381636	38.0643064300402	43	10.7245859801769	43	9.01013550907373
dgrp320_05_1wf_9100_20s_041214	1	41214	dgrp320	0.418488350323355	0.117432899985995	0.10823917388916	0.0244825038790776	0.226188938804617	79.6875	0.319350785972165	0.280612112368856	0.266307711601257	0.0471136853858724	0.176914461479868	NA	NA	NA	0.108061628422786	1.45730402688725	1.38631585681417	NA	NA	NA	NA	0.176914461479868	1.38955277781885	0.163179212382862	0.149795532226563	0.581511649676645	NA	NA	54.2392342428431	NA	8.22030299901962	NA	11.4225448668003
dgrp320_06_1wf_11440_20s_270115	1	270115	dgrp320	0.643229016871231	0.429195621917988	0.422829985618591	0.068195595310522	0.161283725445236	48.1246550117505	0.181845269750423	0.66725164857404	0.653486251831055	0.0555816055152535	0.0850539783499882	1.50822271660334	1.530254075274	0.120585469083511	0.0788009462166734	0.565218613878429	0.580002704281821	0.0898766906165556	0.154959088902601	NA	NA	0.0850539783499882	0.552887529575917	0.237296907107035	0.230628967285156	0.35563330208948	0.026407938908697	0.114503998433317	39.3734141394927	29	12.4466730356216	30	7.11890721321106
dgrp320_06_1wf_9100_20s_041214	1	41214	dgrp320	0.641892274504161	0.398802287155582	0.391031265258789	0.020211430806864	0.0516875058404546	68.8922648196115	0.291056763848379	0.621291613867206	0.615657806396484	0.017109846632843	0.0277911632973338	1.61062864872294	1.62427892509496	0.0436808411384424	0.0268924508368468	0.559395596750664	0.562492537242147	0.0349411748409647	0.0621184682952032	NA	NA	0.0277911632973338	0.558063371990243	0.222556949127465	0.224617004394531	0.358216567164279	0.00622416708046144	0.0277101330651215	48.8407051670299	31	12.362870901823	32	7.1218223720789
dgrp320_07_1wf_11440_20s_270115	1	270115	dgrp320	0.683406114873551	0.519087672233582	0.507401466369629	0.041598810051399	0.0819840162249262	50.0430439721646	0.193129502336342	0.759559595584869	0.745716094970703	0.0429144485003932	0.0575479713926238	1.32029358808593	1.34099291505742	0.0730779339669101	0.0544953915463311	0.465872801728646	0.469641836826752	0.0347712391678141	0.0740377803705784	NA	NA	0.0575479713926238	0.463669111224999	0.240684919632398	0.238326907157898	0.316874305889149	0.00426194581918034	0.0178827723231296	40.3782557944248	25	12.9771918058395	26	6.25780791044235
dgrp320_07_1wf_9100_20s_041214	1	41214	dgrp320	0.685350994773408	0.395443733124172	0.399276733398438	0.0162345992824337	0.0406600182892031	71.4149680126652	0.287665936449209	0.576994468731915	0.57407283782959	0.0162586864915344	0.0283216439102118	1.73443229561537	1.74198264290366	0.0480142144251937	0.0275629694823826	0.458742277010564	0.458301393416198	0.0289494013210791	0.0631667320609458	NA	NA	0.0283216439102118	0.458611926060566	0.181355212096657	0.183011054992676	0.314310139740558	0.00782458081058326	0.0427546893869139	50.8713143628116	34	13.4450869262218	35	6.347432423383
dgrp320_08_1wf_11440_20s_270115	1	270115	dgrp320	0.499413239765988	0.185957912566527	0.18451002240181	0.00667940489275623	0.0362007700492844	64.5691028666188	0.254357524932559	0.37235278875198	0.369041442871094	0.00691452377267507	0.0187364424951328	2.68634500581156	2.70972276777408	0.0499787293245329	0.0184442223827895	1.00403145117732	1.0000103379475	0.049007766339031	0.0490072597045529	NA	NA	0.0187364424951328	1.00234979847265	0.186394876185453	0.184513092041016	0.500586760234012	0.00380405774743779	0.0206167362183285	48.1454656743499	53	9.85576936602592	53	9.87892843782902
dgrp320_08_1wf_9100_20s_041214	1	41214	dgrp320	0.800958878193223	NA	NA	0.0878324332344371	0.10348711791508	71.2609640686961	0.354751091557565	NA	1.05672073364258	0.0873559549824986	0.082667020908521	0.946650573210155	0.9539464227555	0.0786956016985889	0.0824947814902167	0.251715272488252	0.254570540074132	0.0271475523802869	0.106640589175721	5.55555555555556	NA	0.082667020908521	0.249296943976179	0.212363850129278	0.208071708679199	0.199676600584159	0.00803891773203457	0.0386353232886111	45.9810592798818	18	15.3333179354668	19	4.03491315245628
dgrp320_09_1wf_11440_20s_270115	1	270115	dgrp320	0.404411725546303	0.238328976556659	0.238353729248047	0.0340610948253189	0.142901455466101	62.1920486637962	0.350748903405555	0.589322617277503	0.599653720855713	0.0631826759053248	0.105365269501142	1.73852954229862	1.66763374991998	NA	NA	1.50266422216362	NA	0.232532782020291	0.150180539189674	NA	NA	0.105365269501142	1.47599279898405	NA	NA	0.596908794731059	NA	0.112595709826225	40.3782557944248	32	7.62652724981308	33	11.6084711551666
dgrp320_09_1wf_9100_20s_041214	1	41214	dgrp320	0.707891042122333	0.488191970757076	0.499179363250732	0.0631064138738274	0.126420318065372	78.2654986648012	0.361148898901902	0.68964281465326	0.698846817016602	0.0537502653974354	0.076912799899264	1.45925154252673	1.43111037107906	0.124456618484983	0.0869650734143881	0.419346040159147	0.423305336948615	0.0604449607955066	0.142792815302596	NA	NA	0.076912799899264	0.413108303893997	0.201676157014123	0.191359996795654	0.292435667752911	0.0244222358190746	0.127624562228406	50	28	13.6693751811981	29	5.84860855340958
dgrp320_10_1wf_11440_20s_270115	1	270115	dgrp320	0.676284769278441	0.526156598329544	0.530460357666016	0.027068845979156	0.0510289705686148	58.4865966953113	0.191166839715348	0.778010421395302	0.784162521362305	0.0268969012408527	0.0343001616477735	1.2868527550532	1.27524584860639	0.0467619427789998	0.0366689629533803	0.480011545880863	0.478274930046176	0.0271965126632118	0.0568637638200817	NA	NA	0.0343001616477735	0.478802294315779	0.251924986449572	0.253692626953125	0.323806699141335	0.00368686334518087	0.0145327965950784	47.3058988393625	25	13.1539149582386	26	6.55004964768887
dgrp320_10_1wf_9100_20s_041214	1	41214	dgrp320	0.75937700979033	NA	NA	NA	0.14399156719238	76.5625	0.365613188646277	NA	NA	NA	0.111740372145038	0.923805512241194	0.877351986344925	0.116683922324503	0.13299556408439	0.322905564978617	0.302769139517054	0.0526945427645093	0.174041987398591	5.88235294117647	NA	0.111740372145038	0.315924364501754	0.262995630502701	0.26610279083252	0.239905699235253	0.00975638429583769	0.0366639683308628	48.5702402442694	17	14.1518864035606	18	4.73392134904861
dgrp320_11_1wf_11440_20s_270115	1	270115	dgrp320	0.348333744505357	0.100053985265718	0.0999550819396973	0.00966257374502633	0.0966691593615595	59.2793600673961	0.293215804040636	0.287235982284166	0.284473419189453	0.00881995558378653	0.0310044980965783	NA	NA	0.108280126441079	0.03080281779896	NA	NA	0.230690151328507	0.124965436876098	NA	NA	0.0310044980965783	NA	0.187181997018448	0.184511959552765	0.651666255494643	0.00599673925841339	0.0325005450754996	41.8977148422202	NA	6.90372498333454	NA	12.9155577942729
dgrp320_11_1wf_9100_20s_041214	1	41214	dgrp320	0.66189894274517	0.424573816855749	0.4326171875	0.0288530631173338	0.0666942136165909	72.2983456328705	0.369912115142955	0.641448096434275	0.648849964141846	0.0303129392703966	0.0467179485946151	1.56242884271814	1.54119400440351	0.0785714562809331	0.0509808992615064	0.51308147392975	0.509792815754813	0.039554342859039	0.0775890550761758	NA	NA	0.0467179485946151	0.51080464920005	0.216874279578527	0.216312885284424	0.33810105725483	0.00773992809296497	0.0357811698678419	45.5543116784789	30	12.7372145056725	30	6.5062283873558
dgrp320_12_1wf_9100_20s_041214	1	41214	dgrp320	0.644456841897667	0.461104406760289	0.465902328491211	0.0527380069245218	0.113195413930018	73.7029775941922	0.321270188290384	0.715493073830238	0.715492248535156	0.0493174525943976	0.0689280040354964	1.4045055381056	1.39784972038366	0.100326414218146	0.0717719600005425	0.560381184842121	0.545195738437427	0.0795891553441267	0.145982717275515	NA	NA	0.0689280040354964	0.551971289622366	0.254516394050033	0.257835388183594	0.355721674128213	0.00695523908292942	0.026975502206768	50.0244081049441	26	11.9887145757675	27	6.87194263935089
dgrp321_01_1wf_9100_20s_031214	1	31214	dgrp321	0.742079607108718	NA	NA	0.0693669481463249	0.0898973892413118	78.3746012749028	0.361726792976196	NA	NA	0.0687020259083232	0.0660619447004083	0.957215343890374	0.9616099218846	0.0640033285574878	0.0665585151534747	0.34982628298733	0.351227367503151	0.032929100686188	0.0937543703393004	NA	NA	0.0660619447004083	0.347269326117091	0.270384884194324	0.268340110778809	0.25770148508588	0.00456424237878457	0.0170091693170197	50.0244081049441	18	14.0148511528969	19	5.13731279969215
dgrp321_02_1wf_9100_20s_031214	1	31214	dgrp321	0.492376279070787	0.215197100904253	0.216309547424316	0.0147896303999929	0.0683725271311363	81.7196872421789	0.362426971279508	0.43705822163158	0.440936088562012	0.0154388145677147	0.035013724138716	2.29072460852419	2.26790236939148	0.0822682485880804	0.0362750397452754	1.03602873006922	1.03847120391149	0.0762877012241241	0.0734615470672466	NA	NA	0.035013724138716	1.03096705204239	0.221861120727327	0.224627494812012	0.507623720929213	0.00480604159211065	0.0213956069631315	52.1022685010873	45	9.68386954069138	45	9.98375043272972
dgrp321_03_1wf_9100_20s_031214	1	31214	dgrp321	0.595019478329387	0.365527176087902	0.366060256958008	0.0283563286173804	0.0774635543695018	67.4775715052787	0.39086489478318	0.614311277866364	0.615638732910156	0.0296293162644758	0.0481277650033754	1.63165653067116	1.62432924789015	0.0797437762729973	0.049093357382179	0.684609536223548	0.681624265533192	0.0529868700853714	0.0777361851164778	NA	NA	0.0481277650033754	0.680685979788213	0.248809223994613	0.249588966369629	0.40502141659971	0.00388228957321856	0.0155547323653285	41.1029576186435	31	11.331342458725	32	7.96189516782761
dgrp321_04_1wf_9100_20s_031214	1	31214	dgrp321	0.62862601066555	0.409329639871915	0.415881156921387	0.0312670224774489	0.0751825899228209	71.9429027076334	0.348079759479735	0.651149702568849	0.649008750915527	0.0298410269164388	0.0459793906851694	1.53926238123555	1.54099242418676	0.0775046741571104	0.0502952986274496	0.596356013341465	0.588594489472442	0.059874733026689	0.101724929637644	NA	NA	0.0459793906851694	0.590728514274169	0.241802690009917	0.241272926330566	0.371347309314558	0.00519235856319218	0.0215206846543493	46.9010344368864	30	12.2798891961575	31	7.49588339030743
dgrp321_05_1wf_9100_20s_031214	1	31214	dgrp321	0.563287773157809	0.255569476027821	0.257908821105957	0.0229824950754764	0.0891109306650449	65.643598555	0.404454686053888	0.453710320384003	0.457566261291504	0.0233921069615503	0.0511228841381899	2.21103973684102	2.18547581978061	0.141153350442469	0.0645870108307302	0.785339045493946	0.750550049092329	0.122312485118244	0.162963796040199	NA	NA	0.0511228841381899	0.77529150756099	0.198140844356182	0.199670791625977	0.436712226842191	0.0035709265303641	0.0178840705808046	39.09373750999	43	10.9894874691963	43	8.52005630731583
dgrp321_06_1wf_9100_20s_031214	1	31214	dgrp321	0.425612662103594	0.165220512151718	0.166390895843506	0.00789566235216767	0.0474524901866849	84.4328505381643	0.329690318962085	0.388194541335106	0.391019821166992	0.00839493604637574	0.0214693363147709	2.57710610880402	2.55746033449449	0.0564881997673716	0.0220876152038296	1.35282482379074	1.35000401196712	0.0725935854298508	0.0537728664406507	NA	NA	0.0214693363147709	1.35073764678948	0.223169565785165	0.224629402160645	0.574891045653616	0.00419661549468337	0.0186823962238129	56.5961571133589	50	8.26102560758591	51	11.3816478550434
dgrp321_07_1wf_9100_20s_031214	1	31214	dgrp321	0.562640413281509	0.274538638442755	0.232954978942871	0.130952428652154	NA	78.1640492288962	0.389460117282256	0.487946887500584	0.449158668518066	0.134670039906873	NA	2.14827335064892	2.26776993914123	NA	NA	0.879235119329072	0.896636230681055	NA	0.305250817823406	NA	NA	NA	0.776112140873062	0.213072770434182	0.216303825378418	0.436672055693616	NA	NA	47.7222694489543	40	10.9815455377102	41	8.73598358780146
dgrp321_08_1wf_9100_20s_031214	1	31214	dgrp321	0.636238759625061	0.428025846851283	0.391010284423828	0.118477571788787	NA	NA	NA	0.672744060898649	0.632304191589355	0.120214221683969	NA	1.52438249223612	1.58151727175239	0.235070535920154	0.148636085181469	0.606521867253829	0.630671354845462	0.135839824926939	0.215389241771137	NA	NA	NA	0.572761645430405	0.245156788329283	0.241363525390625	0.36441315884945	0.00600904072179872	0.0248962253599571	NA	29	12.4127495586872	30	7.3547036498785
dgrp321_09_1wf_9100_20s_031214	1	31214	dgrp321	0.536560820185042	0.249770897484961	0.257817268371582	0.021941273246614	0.0851039706734885	67.6134524365452	0.338646844118924	0.465503421212946	0.474205017089844	0.0183251013021734	0.0386438368253313	2.15092571160957	2.10910217291172	0.0888748166643103	0.0421386966481639	0.872086063269137	0.839075092435406	0.122098401439601	0.145515464039353	NA	NA	0.0386438368253313	0.863010905532573	0.21555500841418	0.216308116912842	0.463057839301193	0.009663554886338	0.0446749526751776	44.7163701489242	42	10.4903776943684	43	9.26886536180973
dgrp321_11_1wf_9100_20s_031214	1	31214	dgrp321	0.591153711450966	0.329235346828188	0.332795143127441	0.0382191222101422	0.114842788422265	77.4196122395268	0.361376795351708	0.556936953030527	0.557415962219238	0.0376070210471119	0.067466709954604	1.80411830198054	1.79399240025116	0.128263851966399	0.0714963184617963	0.701915584019684	0.684225132880043	0.0956855597025919	0.139845140297364	NA	NA	0.067466709954604	0.690654545096632	0.227387888693354	0.232848167419434	0.408282997664353	0.0093443037362749	0.0401304585723573	49.4419608710347	35	11.5232371389866	36	8.18596399296075
dgrp321_12_1wf_9100_20s_031214	1	31214	dgrp321	0.711610325823354	0.602798494425687	0.599023818969727	0.0351193128090245	0.058627573223093	68.8209860798289	0.36065432933511	0.847090707583861	0.848596096038818	0.0322110316273158	0.0379580247631051	1.18221096797005	1.19008414539198	0.0454641054433344	0.03820242931508	0.40592794087398	0.408251237491887	0.0257470561912302	0.0630666947867901	NA	NA	0.0379580247631051	0.404446370325803	0.243799663108328	0.241269111633301	0.287808213365618	0.00796385164196644	0.0330081691272214	44.0003995010273	22	13.2615668773651	23	5.60739225149155
dgrp324_02_1wf_11440_20s_200215	1	200215	dgrp324	0.785631523395027	0.789841730343668	0.521447896957397	NA	NA	80.5503381557148	0.365409681388251	1.00535900969254	0.736138939857483	NA	NA	1.27286954842062	1.35843921012194	0.457764479680723	0.33697825877658	0.390098762952322	0.412653230423025	0.160646014501194	0.389300271165963	26.3157894736842	NA	NA	0.273781752987535	0.216244253516197	0.2070631980896	0.215091575677358	0.0246007841880883	0.118808095378896	51.1164647545192	19	15.0069928765297	20	4.32488507032394
dgrp324_04_1wf_11440_20s_200215	1	200215	dgrp324	0.748964961546879	0.661301913715544	0.651822090148926	0.0438277194935826	0.067238775972703	78.599128506619	0.48400848506817	0.882954407305945	0.874207496643066	0.0436994107181576	0.0499874582246917	1.13523320449997	1.14389318764707	0.0559469569229463	0.0489092491564063	0.336597724746405	0.341149807380269	0.0228408187955034	0.0669524598911569	NA	NA	0.0499874582246917	0.334699948839127	0.221337716687809	0.222380638122559	0.250678534312039	0.00282664137137369	0.0127108249856531	40.5564833904519	21	13.8873401880264	22	4.86942976713181
dgrp324_05_1wf_11440_20s_200215	1	200215	dgrp324	0.83246454118679	1.05925497213999	1.0122127532959	0.153906227996787	0.152049287559011	75.9705492674628	0.399851911267914	1.27243254184723	1.2346019744873	0.150706813164138	0.122069149635632	0.795882833800194	0.809977645155858	0.0887790255252175	0.109606760206492	0.204736598893807	0.212108364377764	0.0266939998957106	0.125850764886239	53.3333333333333	NA	0.122069149635632	0.201342124114514	0.213272646069527	0.214699983596802	0.167610178972562	0.00428223250254553	0.0199451924998159	45.5935799427946	15	15.8888245820999	16	3.41236233711243
dgrp324_06_1wf_11440_20s_200215	1	200215	dgrp324	0.676481297076496	0.426210548608534	0.429427146911621	0.0406512296621048	0.0946638561499027	NA	0.377657596658768	0.63004040237396	0.636474609375	0.0344064243502987	0.0540578113305805	1.59182390979326	1.57115458381281	0.0888193614145407	0.0565312683612567	0.48210304887745	0.471723438805298	0.0627836493829148	0.133094190829107	NA	NA	0.0540578113305805	0.477348938347809	0.203451152890921	0.199377059936523	0.322917628971614	0.0174155079784539	0.0873496077432308	59.5322954790087	31	13.2125270068645	32	6.51043689250946
dgrp324_07_1wf_11440_20s_200215	1	200215	dgrp324	0.787482589114148	0.718904668092728	0.651817321777344	0.256529482566403	0.393560394907749	83.041301109749	0.443333153565066	0.912915000319481	0.843530654907227	0.256450030612415	0.304019811396919	1.13952771814795	1.19637837958101	0.178279641072602	0.14901610068801	0.285771551865079	0.297604942685853	0.0505098174117372	0.169721030020172	5	NA	0.304019811396919	0.27022546026185	0.19426634481975	0.19171667098999	0.212797845091564	0.00442418326419758	0.0230766747688237	46.2263392126177	20	14.3780933618546	21	4.07959324121475
dgrp324_08_1wf_11440_20s_200215	1	200215	dgrp324	0.755456981794136	0.597171622018019	0.598147869110107	0.0437470198747547	0.0731374667268132	83.0099315323173	0.428080482375568	0.790477335453033	0.789855003356934	0.0440519800123144	0.0557722364549072	1.26958154858905	1.26607808666422	0.0818630053683045	0.0646587333203055	0.324866659071778	0.320990497597914	0.0313804652283212	0.0977613526355213	NA	NA	0.0557722364549072	0.322567627681004	0.19262823343277	0.191709041595459	0.243685966432386	0.00460006033717981	0.0239950098278973	47.475	24	14.3321189284325	25	4.81570583581924
dgrp324_09_1wf_11440_20s_200215	1	200215	dgrp324	0.79967369936582	0.751497355103493	0.720839500427246	0.147460860425718	0.204568229596626	77.0337853801824	0.383492882171213	0.939754997193813	0.904880523681641	0.147967528021239	0.163521618764885	1.08840254761915	1.11458507170137	0.162613389914928	0.145895897983548	0.25899253268587	0.260869741537796	0.0450938694962466	0.172859716233947	5	NA	0.163521618764885	0.250727695100354	0.188421199719111	0.191695004701614	0.200500343474366	0.00501007226799908	0.0261356433142198	47.4918770001776	20	15.0299471020699	21	3.95684519410133
dgrp324_10_1wf_11440_20s_200215	1	200215	dgrp324	0.816890845879226	0.881859484646055	0.429420471191406	NA	NA	89.2552446526253	0.351477501978849	1.07953160338932	0.636471748352051	NA	NA	1.31946890368482	1.59032738501485	0.598224407452224	0.376164312511439	0.400508209341081	0.439968311098453	0.218243330005123	0.496043293345929	22.2222222222222	NA	NA	0.224153759396939	0.197672118743261	0.184042930603027	0.183109154120774	NA	NA	57.8840342236095	18	15.873470723629	18	3.55809813737869
dgrp324_11_1wf_11440_20s_200215	1	200215	dgrp324	0.76368780544899	0.60611816495657	0.582812309265137	0.0720826490751221	0.123680725216683	76.7210623623005	0.397475246180472	0.793672703206539	0.766849517822266	0.0741775703565967	0.0967302823209038	1.26917897060586	1.30407086865843	0.111665682870008	0.0856285387195906	0.312754198477931	0.324335407192291	0.0324778986627105	0.100136765652154	NA	NA	0.0967302823209038	0.309204170926611	0.187414264678955	0.184052467346191	0.236135454730618	0.00551868808485763	0.0299843200389013	46.2263392126177	24	14.5468359589577	25	4.68535661697388
dgrp324_12_1wf_11440_20s_200215	1	200215	dgrp324	0.8504679346211	NA	NA	0.617038219910202	0.481831634091896	NA	0.294515480834743	NA	NA	0.618631004840441	0.409509076770809	0.776484467579624	0.815039478163811	0.29529783789159	0.362311085294742	0.214114681964997	0.218045858031046	0.0916991472589848	0.420549824183903	58.3333333333333	NA	0.409509076770809	0.174286436092698	0.222970788295452	0.222382545471191	0.148225025336229	0.0129353585539809	0.0581671485348502	NA	12	15.3520234823227	13	2.89862024784088
dgrp332_01_1wf_9100_20s_101214	1	101214	dgrp332	0.634709831403168	0.383499863557518	0.39109992980957	0.0467381348520429	0.119504329430077	59.4571799701264	0.36710784000128	0.604212893173099	0.61572265625	0.0486625936576014	0.0790333004050496	1.66589043107592	1.64654266803803	0.140722085781869	0.0854651923169105	0.584654380442425	0.564925018001161	0.0801097928532734	0.141806063283798	NA	NA	0.0790333004050496	0.575832633738586	0.220831736470714	0.224552154541016	0.36548663387666	0.00557031190573627	0.0248063168982813	37.6299830587259	32	12.2719956338406	33	7.28744730353355
dgrp332_02_1wf_9100_20s_101214	1	101214	dgrp332	0.602976904953719	0.357998960849011	0.341183662414551	0.0463450725191273	0.135836142302782	65.7150112743874	0.344002663523487	0.593719192075007	0.574057579040527	0.0454938453678726	0.0792496206459122	1.69216302048292	1.74198553683654	0.124481251058861	0.0714594056187856	0.671502466564708	0.674688886282204	0.0868021021221597	0.128655005124618	NA	NA	0.0792496206459122	0.65843831129279	0.235720231225996	0.232951164245605	0.39702309504628	0.00695901991653263	0.0298732995779132	43.1088723625221	33	11.8139657080173	33	7.77876763045788
dgrp332_03_1wf_9100_20s_101214	1	101214	dgrp332	0.814688624438789	NA	0.665586292743683	NA	NA	62.6755347504112	0.275313230691398	NA	0.873564541339874	NA	NA	1.22114230994694	1.14473510848574	NA	NA	0.622768749028905	0.312473218327552	0.736220426839649	NA	38.4615384615385	NA	NA	0.224286629742283	0.254923188260623	0.207991600036621	0.182723765864752	NA	NA	45.4201307929645	13	14.7757423222065	14	3.56892463564873
dgrp332_04_1wf_9100_20s_101214	1	101214	dgrp332	0.60398962787068	0.338252746207374	0.257896423339844	0.268167136848481	NA	57.8125	0.241315197426043	0.560030720063618	0.474210262298584	0.271103685705247	NA	2.03321384145753	2.10876920957555	NA	0.289630372671924	0.9890142099738	0.833865741448354	NA	NA	2.85714285714286	NA	NA	0.655657570686148	0.221777973856245	0.207993268966675	0.396010372129321	0.0508988984557866	0.244714161706559	43.8614651488069	35	11.8388461172581	35	7.76222908496857
dgrp332_05_1wf_9100_20s_101214	1	101214	dgrp332	0.765346453045774	0.592677457332611	0.598897933959961	0.0321261580384467	0.0536421253384963	43.75	0.177795397627047	0.774391068220139	0.773795127868652	0.0313939165068861	0.0405713545823915	1.29346650706773	1.29233173482807	0.0526358598739855	0.0407293719216671	0.307426810840827	0.305564798466508	0.0175469369947189	0.0574246021884036	NA	NA	0.0405713545823915	0.30668355499205	0.181764429578414	0.18303108215332	0.234719171020634	0.00461385502782916	0.0252080410253175	35.9714513538167	25	14.8169364333153	26	4.72587516903877
dgrp332_06_1wf_9100_20s_101214	1	101214	dgrp332	0.412420575265771	0.127008183393627	0.124873161315918	0.00725355975467413	0.0580874198926002	61.0175755930207	0.268274008708583	0.307957922108471	0.307741165161133	0.0361418587115657	0.117442392513988	NA	NA	0.210950495917142	0.0649173466925802	NA	NA	0.393291116113079	0.281105627624828	NA	NA	0.117442392513988	NA	0.180949738714844	0.174716949462891	0.587579424734229	0.0386875971795046	0.221430131984543	44.6481459870021	NA	8.12852373719215	NA	11.58078327775
dgrp332_07_1wf_9100_20s_101214	1	101214	dgrp332	0.753973667046693	0.746133837260698	0.707174301147461	0.231711468126066	0.327658213470273	45.4201307929645	NA	0.989601984620094	0.956745147705078	0.225664970995649	0.235867379664215	1.068575635604	1.04521042243974	0.274733727909565	0.262850161088404	0.363309288664276	0.352938400002158	0.135993317949345	0.385317432017921	10.5263157894737	NA	0.235867379664215	0.32615360096536	0.243354237824678	0.249587059020996	0.245911226540336	0.0119076845981383	0.0477095432946167	40.1717504130701	19	14.1765429079533	20	4.86708475649357
dgrp332_08_1wf_9100_20s_101214	1	101214	dgrp332	0.827623087054353	NA	NA	0.0906117142059161	0.0756263123990591	75.4058032000853	0.356306813109466	NA	NA	0.0899934980423977	0.0618063794879403	0.68989462376813	0.686787166099734	0.044712639455228	0.0651040695899301	0.209533724932945	0.210952086206813	0.0169797440936598	0.0804909986858973	92.3076923076923	NA	0.0618063794879403	0.208203525509786	0.250767873866217	0.249589920043945	0.172314044518009	0.00315888048073085	0.0126562822736378	48.5382017719033	13	15.6576712727547	14	3.51075023412704
dgrp332_09_1wf_9100_20s_101214	1	101214	dgrp332	0.590887480944863	0.318445097241137	0.291287899017334	0.0751982300466882	0.258157754923466	53.21683239352	0.236613714630886	0.538926796573732	0.515825986862183	0.0716185627898216	0.138842486834531	1.87977734771059	1.93866067392464	0.202314079792221	0.104357653979051	0.721492926779666	0.757581349465659	0.123685898336927	0.163264180703717	NA	NA	0.138842486834531	0.693429104217996	0.220819098522534	0.224626541137695	0.409738576605225	0.0112030918495704	0.0498743015532743	40.625	36	11.4640235006809	37	8.17030664533377
dgrp332_10_1wf_9100_20s_101214	1	101214	dgrp332	0.695626411023793	0.517077450568859	0.540775299072266	0.106656063413081	0.197228060519879	54.2002137055563	0.224410382495308	0.743326363655237	0.765388488769531	0.108078274348104	0.141207081023462	1.37807499877608	1.33552146836852	0.238461696243477	0.178553248219052	0.463064683761913	0.435556882839269	0.129833812175489	0.298086925705638	NA	NA	0.141207081023462	0.43755323856701	0.226248913086378	0.22464656829834	0.304373588976207	0.00489913495006985	0.0218081895805486	42.037123016565	26	13.4440137147903	26	5.88247174024582
dgrp332_11_1wf_9100_20s_101214	1	101214	dgrp332	0.642977090210072	0.438261021460806	0.407647132873535	0.109515204850643	0.268651968869895	51.5388203202208	0.242076171761459	0.681612188262599	0.657194137573242	0.10939466452738	0.166457152115402	1.49215854019892	1.54078410455119	0.171720565267654	0.111450114756781	0.57466889871777	0.603923582089552	0.105447251178602	0.174603632488996	NA	NA	0.166457152115402	0.554447010433949	0.242992513138672	0.241353988647461	0.356496725444494	0.0131045599350307	0.0542960156095541	39.0625	28	12.2713086009026	29	7.0467828810215
dgrp332_12_1wf_9100_20s_101214	1	101214	dgrp332	0.552546098579053	0.224102705717087	0.24959659576416	0.0595766573445694	0.238691786489197	49.4204705599973	0.240545587554896	0.405581916682422	0.415984153747559	0.037284456542011	0.0896295116198998	2.48584435647324	2.40394874698812	0.244203661716394	0.101584387779629	0.88736161707494	0.730867001047236	0.381915060244585	0.522550696224281	NA	NA	0.0896295116198998	0.808429409487148	0.181171218047337	0.166407585144043	0.446694516188691	0.0258057061680293	0.155075299877056	37.5325944319033	48	10.7569298744202	49	8.8773896843195
dgrp335_01_1wf_11440_20s_200215	1	200215	dgrp335	0.72036338772212	0.636837473937443	0.613468170166016	0.120455736850702	0.196352056567343	97.943327230598	0.39808028868068	0.884050306819734	0.858879089355469	0.121827315288908	0.141844546920255	1.15265045929338	1.16430823895181	0.162625479398865	0.139675623652094	0.401578203996659	0.399980256985646	0.0779159371693087	0.194799457744498	NA	NA	0.141844546920255	0.387509381673461	0.246780495751988	0.245389997959137	0.279147570956399	0.00462699167418582	0.0188556653191558	58.9540192522953	21	13.3735869526863	22	5.42917090654373
dgrp335_02_1wf_11440_20s_200215	1	200215	dgrp335	0.592886039916763	0.294936245832688	0.291398048400879	0.0780466263881631	0.267835103276991	96.6833681715733	0.449961909829246	0.497458577156067	0.483105659484863	0.0826700658292724	0.171122122471974	2.06581160132585	2.0699405613801	0.346503504008993	0.167397803818081	0.742690649967051	0.636327406802344	0.255689685304043	0.401820953444278	NA	NA	0.171122122471974	0.68704842591198	0.202635483443737	0.214698791503906	0.407341420469999	0.020532194059592	0.0956325553384328	53.179535180368	39	11.5025135874748	40	8.10541933774948
dgrp335_03_1wf_11440_20s_200215	1	200215	dgrp335	0.345829593594736	0.0966649563379691	0.0996699333190918	0.0170726717221479	0.171292095355276	NA	NA	0.279516149364727	0.276096343994141	0.00748954673406739	0.0271265697535869	3.5796585987102	3.62192409190765	0.0957779615255575	0.0264439450124179	NA	NA	0.597029073076329	0.337379073023619	NA	NA	0.0271265697535869	NA	0.182851193026758	0.176376819610596	0.654170406405264	0.0217659354408065	0.123405873225638	42.6418419161274	71	6.8632118999958	71	12.9824347048998
dgrp335_04_1wf_11440_20s_200215	1	200215	dgrp335	0.592479203158944	0.306736330728273	0.306737899780273	0.0111336643558414	0.036296996112371	89.2619782718264	0.366948392751206	0.517716620419477	0.513816952705383	0.0116067577091839	0.0225892852465674	1.93241984703838	1.94621838523376	0.0430707711717348	0.0221304923941316	0.688832215493172	0.682983796113737	0.030943121317251	0.0453057912842461	NA	NA	0.0225892852465674	0.687484320122025	0.210876417787452	0.21467399597168	0.407320162170166	0.00539506909453959	0.0251314513903739	56.5074388111866	37	11.3492442369461	38	8.01330387592316
dgrp335_05_1wf_11440_20s_200215	1	200215	dgrp335	0.331511277308835	0.0956292261972147	0.099675178527832	0.0121936152933873	0.12233351846952	79.7680469862463	0.390617027598492	0.288464473889155	0.28373122215271	0.0318059405749533	0.11209883894214	3.49048435858919	3.52446527636561	0.226175475987342	0.064172990298424	NA	NA	0.690971929813739	0.359387354325036	NA	NA	0.11209883894214	NA	0.19283524769194	0.184047698974609	0.668488722691165	0.0357979222032418	0.194503503182511	48.6092895751419	68	6.5027873814106	68	13.1127968430519
dgrp335_06_1wf_11440_20s_200215	1	200215	dgrp335	0.689945148823376	0.530342988967896	0.421755313873291	0.26896528861845	NA	101.202823720487	0.305185841453086	0.768674132823944	0.65180492401123	0.27035492246354	0.41477888936427	1.41103703907521	1.53420135866106	0.387777543840003	0.252755312495895	0.535377188108863	0.589291226667555	0.215081328260396	0.364983082264234	8	NA	0.41477888936427	0.449390580838764	0.238331143856049	0.237716197967529	0.310054851176624	0.010626968754117	0.0447044368241519	NA	25	13.2585747241974	25	5.95827859640121
dgrp335_07_1wf_11440_20s_200215	1	200215	dgrp335	0.677789254680067	0.504574825763702	0.467766761779785	0.274946080042772	NA	87.740741716719	0.340283281277759	0.744442055225372	0.720804214477539	0.278876540371384	0.386896378753171	1.53001729870368	1.38733928009124	0.553681819065309	0.399096188661865	0.631494221688614	0.523833024719385	0.348460174452553	0.665212306229111	8	NA	0.386896378753171	0.475805679800268	0.2400795679826	0.237719058990479	0.322495977084366	0.0142694358007425	0.0600264693177757	57.8840342236095	25	12.6143706440926	26	6.24206876754761
dgrp335_09_1wf_11440_20s_200215	1	200215	dgrp335	0.646044896435624	0.527197748422623	0.590447902679443	0.165764945543507	0.280744405715167	91.6648696611739	0.369734862129231	0.816038871804873	0.851183176040649	0.170608413185907	0.20043677787372	1.28447350535178	1.17485861542555	0.318098247153681	0.270754491627455	0.594044375640696	0.457176270871763	0.312475393365003	0.683489964973821	NA	NA	0.20043677787372	0.547880039788607	0.28884112338225	0.253063201904297	0.353955103564376	NA	NA	57.7731717149059	24	12.6527459621429	24	6.93218696117401
dgrp335_10_1wf_11440_20s_200215	1	200215	dgrp335	0.690441225771429	0.442976127068202	0.437099456787109	0.0429918200151755	0.0983570657606989	76.8541251267621	0.377839534961026	0.641584121187528	0.636472225189209	0.0432396885449138	0.0679364893449351	1.56558500548578	1.57117812587094	0.104240741454379	0.0663455910809581	0.452819413692318	0.456129441873556	0.0417713813349377	0.0915779107863798	NA	NA	0.0679364893449351	0.448964957395368	0.19888075801634	0.199375152587891	0.309983915512475	0.00337567232354386	0.016931258884207	47.8155982290298	30	13.2892838120461	31	6.16530349850655
dgrp335_11_1wf_11440_20s_200215	1	200215	dgrp335	0.453554629259616	0.148510984579722	0.153350830078125	0.0116238226148212	0.075798889441286	81.4826161214771	0.37788687241598	0.327437920371691	0.329736709594727	0.0086304412222642	0.0261737348955526	3.05601858091045	3.03273584428168	0.0823366573999669	0.0271493007065602	1.21431613034754	1.20000497462939	0.144775780768791	0.120645983833111	NA	NA	0.0261737348955526	1.20452557524922	0.178885279131717	0.176375865936279	0.546318150715884	0.00734546224651326	0.0416466403014969	50.6914051590602	60	8.91065907478333	61	10.9120020270348
dgrp335_12_1wf_11440_20s_200215	1	200215	dgrp335	0.821291568934977	NA	NA	0.365260714692581	0.321839880852714	88.7013483775754	0.370992173827682	NA	NA	0.360811831119888	0.261399839865498	0.765499601191621	0.724476908238194	0.169722631970522	0.234269208639456	0.232599961396487	0.222974948825422	0.0526618493926908	0.23617832258781	61.5384615384615	NA	0.261399839865498	0.218003590861058	0.247029470545905	0.253057479858398	0.179044511171737	0.0179851605222801	0.0710714440543069	55.7938423215322	13	14.7308725714684	14	3.45841258764267
dgrp336_02_1wf_9100_20s_101214	1	101214	dgrp336	0.531436752463338	0.26686738163997	0.274557113647461	0.0383011662722538	0.139501635063929	87.3464053710855	0.38942649910105	0.502162073667233	0.507587432861328	0.0370547716075138	0.0730017514394158	2.00350537334442	1.97010393729192	0.170430003211151	0.0865081278124962	0.912284585697844	0.84791093702253	0.234304467606831	0.276331460506453	NA	NA	0.0730017514394158	0.88070065224555	0.235030277073383	0.232952117919922	0.468036694521719	0.00720340519295398	0.0309222567164218	53.3314005183625	39	10.4078278839588	40	9.40121108293533
dgrp336_03_1wf_9100_20s_101214	1	101214	dgrp336	0.679366232271387	0.463986849242991	0.374385356903076	0.222496195584949	0.594297270132149	59.559745476706	0.291191979898686	0.682970137758689	0.590697765350342	0.238775746983654	0.404226596052951	1.59141860230629	1.71708403440469	0.438378128305819	0.255303828771434	0.54033129131635	0.555570131810384	0.186870401467943	0.336357897533127	NA	NA	0.404226596052951	0.475599088169219	0.220671722422475	0.208120346069336	0.32310596060123	0.0230128585670681	0.110574766002942	42.2164252690822	22	10.2077106833458	23	5.07544961571693
dgrp336_04_1wf_9100_20s_101214	1	101214	dgrp336	0.545590224384933	0.270484333619093	0.282778739929199	0.0645753938400288	0.228360144246335	78.1406234378124	0.35981560033552	0.495764626142306	0.515730381011963	0.070351849105575	0.136412070523228	2.06132846376052	1.93899765617416	0.35249294491652	0.181791320785826	0.900161532610076	0.805427379472479	0.325527315483125	0.404167183509868	NA	NA	0.136412070523228	0.832048541998913	0.225056095421314	0.216409623622894	0.453957550728344	0.0184753347089549	0.0853720569337953	50.0244081049441	39	10.5488890111446	40	9.00224381685257
dgrp336_05_1wf_9100_20s_101214	1	101214	dgrp336	0.661369366662357	0.429752403292163	0.432538986206055	0.024724178620791	0.0571605783738828	81.3851040194089	0.250998945147903	0.649791818240593	0.640712976455688	0.025546071045044	0.0398713183340852	1.54095895428405	1.56076127181289	0.0581537942097739	0.0372598905803358	0.51375706760281	0.510202200509885	0.0327671440642254	0.0642238391592168	NA	NA	0.0398713183340852	0.511724865245306	0.219914990663528	0.216427803039551	0.338439150032668	0.00581800617604481	0.0268819721603957	60.9575287597849	29	12.4628196954727	30	6.59744971990585
dgrp336_06_1wf_9100_20s_101214	1	101214	dgrp336	0.612029299031821	0.350454698590671	0.341815710067749	0.0317180736521355	0.0927929077509308	76.263843433052	0.353022766143356	0.572610983077218	0.565720558166504	0.0304831797078461	0.0538838111286636	1.75088413087383	1.76975151012913	0.0889203885816466	0.0502445614950533	0.638783917611154	0.64285538831043	0.0590279044677579	0.0918214353353974	NA	NA	0.0538838111286636	0.633908705975214	0.222156284486546	0.224557876586914	0.387970700968179	0.00608875997906495	0.027114435136317	49.3409704675922	34	11.9154597520828	34	7.55331367254257
dgrp336_07_1wf_9100_20s_101214	1	101214	dgrp336	0.67705464303832	0.420280741107079	0.416085362434387	0.0164798675912452	0.039606939054108	76.0345316287277	0.380428984503598	0.620748628531733	0.615775942802429	0.0170615448596157	0.0277073910714468	1.61209187344145	1.62396730773363	0.0447552798121189	0.027559224621694	0.477640866581064	0.479932876520766	0.0179409354318748	0.0373821763616949	NA	NA	0.0277073910714468	0.476934335637289	0.200446316041052	0.199672222137451	0.322910606367623	0.00254707506841074	0.0127562814754342	47.1087919740042	31	13.0287029743195	32	6.41428211331367
dgrp336_08_1wf_9100_20s_101214	1	101214	dgrp336	0.670239671899987	0.332138052353492	0.33278489112854	0.0178219783153639	0.0535540488479691	NA	NA	0.495551168154448	0.499172210693359	0.0198866360294511	0.0398392290344612	2.02113295546339	2.00331664819839	0.082601588841836	0.0412324177089632	0.493893682366546	0.487770373507904	0.0272387939650434	0.0558434776781332	NA	NA	0.0398392290344612	0.492227768135852	NA	NA	0.329910577815436	0.00524403599715243	0.0315188025320997	NA	39	12.9533840417862	40	6.53950288891792
dgrp336_09_1wf_9100_20s_101214	1	101214	dgrp336	0.674552470731221	0.568276181169178	0.540779113769531	0.211798476611271	0.391654320994238	76.5625	0.408163265306122	0.842449187908484	0.798680305480957	0.217960502215469	0.272900809898167	1.26954033043152	1.25206542985658	0.360478548751506	0.287907117436185	0.611838366300739	0.526274087890321	0.488303454728263	NA	4.34782608695652	NA	0.272900809898167	0.484322172453216	NA	NA	0.326700718058229	0.0193587667501322	0.0684394410107438	45.3125	23	13.0703521668911	24	6.60549011081457
dgrp336_10_1wf_9100_20s_101214	1	101214	dgrp336	0.724557951876702	NA	0.532464981079102	0.314681099370031	0.590989286717586	67.2056661487705	0.391501626731616	NA	NA	0.30777152550801	0.381375927236325	1.14760058797726	1.23915273385614	0.287491791043212	0.232006743953638	0.432575266575173	0.484358712589329	0.144142216417607	0.297593937449868	14.2857142857143	NA	0.381375927236325	0.380171033049287	0.25754345648668	0.257905006408691	0.275455945069041	0.0113624302335833	0.0440566485769482	40.894538525945	21	14.2262616455555	22	5.66595604270697
dgrp336_11_1wf_9100_20s_101214	1	101214	dgrp336	0.6100646148578	0.375978506528414	0.316173553466797	0.41971949188149	NA	62.5390503005922	0.313952135118209	0.616292925981375	0.557415008544922	0.41158704127418	0.738385287379663	1.8607232351951	1.79403537167289	0.498570061426602	0.277904253895339	0.978849242196325	0.710514646661177	NA	NA	3.84615384615385	NA	0.738385287379663	0.638445570937988	0.240041812260946	0.23293399810791	0.389493051341952	NA	NA	42.9047819304562	26	9.77544116973877	27	6.48112893104553
dgrp338_01_1wf_9100_20s_111214	1	111214	dgrp338	0.441548626455975	0.262710532455733	0.249589920043945	0.0849993273134663	0.34055592989693	NA	NA	0.594975313510407	0.53254508972168	0.176247431919153	0.330953069178168	1.77918600080907	1.87777527067731	0.390306480836976	0.207855799856281	1.42409809040985	1.207219768043	NA	0.671471141644689	NA	NA	0.330953069178168	1.26015653791243	NA	NA	0.556420388434751	NA	NA	NA	33	8.6694475710392	34	11.2559174317867
dgrp338_02_1wf_9100_20s_111214	1	111214	dgrp338	0.587304026313504	0.33570701935712	0.332790374755859	0.0391127596170364	0.117529720160116	71.8919816895459	0.477931514961511	0.571606875342481	0.574052810668945	0.0411041640939573	0.071603454124819	1.75848573504605	1.76760949197343	0.126546909623078	0.0715921192988142	0.712349100332341	0.718098351595046	0.078352809664827	0.109111529765789	NA	NA	0.071603454124819	0.70315268054111	0.236053290537425	0.233023405075073	0.412964400394927	0.00503351148730034	0.0216008837639236	37.532537967076	34	11.4140386581421	35	8.26186516880989
dgrp338_03_1wf_9100_20s_111214	1	111214	dgrp338	0.868284611795653	1.53578082919121	NA	1.20022837988058	0.792701325269618	62.578076232815	0.247199741348056	1.76875278949738	NA	NA	0.693398868489442	0.893608553299755	0.917539741040225	0.556804807948716	0.606845440086835	0.271292820073103	0.271865476225752	0.183091454406834	0.673463423707388	50	NA	0.693398868489442	0.153171252902785	0.235237473791296	0.233065128326416	0.132996241864949	0.025439284325882	0.109150967836996	47.1087919740042	10	15.3578082919121	11	2.58761221170425
dgrp338_04_1wf_9100_20s_111214	1	111214	dgrp338	0.801350633107665	0.98003910779953	0.740450859069824	0.940027418352454	1.26953383447126	NA	NA	1.22298413117727	1.03163242340088	0.925472790650763	0.897095486394126	1.19574286178842	0.969337505604371	0.685721124005161	0.707412144934619	0.480244927652395	0.340673819883053	0.408405301850051	1.19881622248005	33.3333333333333	NA	0.897095486394126	0.248316592526516	0.243359971791506	0.241270542144775	0.198988658632261	0.0231519070787003	0.0959582834808232	NA	15	14.700586616993	16	3.89375954866409
dgrp338_05_1wf_9100_20s_111214	1	111214	dgrp338	0.368672107058452	0.12865859536188	0.133103370666504	0.020683326426554	0.155392957541075	71.7049619098985	0.392200112903896	0.348978381870048	0.33270263671875	0.0749357177891277	0.225233315035236	2.95578614781422	3.08152745696166	0.455846557818972	0.147928767205738	1.76648840018593	1.53307290423022	0.74034252659906	0.482914103142927	NA	NA	0.225233315035236	1.70962167604412	0.21995752344006	0.191364288330078	0.63028982557999	NA	NA	43.5822677530667	56	7.20488134026527	57	12.5375788360834
dgrp338_06_1wf_9100_20s_111214	1	111214	dgrp338	0.525371958202502	0.218451934926053	0.207875490188599	0.0872034344670576	0.419498394870607	54.7395553348507	0.328885733630203	0.415804329704731	0.399422228336334	0.0886170814024866	0.221863169137063	2.4835020288918	2.50361629638185	0.405175828339262	0.161836232223288	1.01017675228271	0.961086064580386	0.339927074000746	0.353690565838304	NA	NA	0.221863169137063	0.902845188396425	0.197228278343876	0.199633836746216	0.474329544581537	0.00535630520291096	0.0268306480014215	36.7364965199572	47	10.2672409415245	48	9.46695736050606
dgrp338_07_1wf_9100_20s_111214	1	111214	dgrp338	0.851941497872014	1.28466909130414	1.2312126159668	0.154867533309155	0.125784556867578	67.2056661487705	0.371832351521829	1.5079311132431	1.45584392547607	0.155196200334365	0.106602224056136	0.668603745878066	0.6907924729171	0.0607267503674191	0.0879088188540623	0.175661106845756	0.176866170357276	0.0169558349487502	0.0958681635640035	NA	NA	0.106602224056136	0.173871107935172	0.223366838235122	0.224624633789063	0.148128012130957	0.00323815625088253	0.0144158554485319	42.2164252690822	12	15.4160290956497	13	2.90376889705658
dgrp338_08_1wf_9100_20s_111214	1	111214	dgrp338	0.801517567617014	0.873550870839287	0.648839473724365	0.502580413089321	0.774583596470308	79.9322222651791	0.35492222612129	1.08987114709966	0.873559951782227	0.508704029484226	0.582334421863518	1.11369871798203	1.14474112275845	0.519837123748328	0.454108892756201	0.358042200297042	0.309665139237273	0.280026767955841	0.904288964026002	41.1764705882353	NA	0.582334421863518	0.248689940152707	0.217243313789368	0.232934951782227	0.199329355922019	0.0278720771424846	0.119656053886419	51.5625	17	14.8503648042679	18	3.91037964820862
dgrp338_09_1wf_9100_20s_111214	1	111214	dgrp338	0.688683199247859	0.545981849233309	0.574049234390259	0.0806860529749845	0.140555980465138	64.0625	0.438494417891642	0.792791010191043	0.815400123596191	0.0843697850590392	0.10347040994664	1.27687976527641	1.226493617081	0.16047287292857	0.130838734660917	0.457025747362366	0.434811609407506	0.0605772522908789	0.139318387504474	NA	NA	0.10347040994664	0.45042088418952	0.245921627283096	0.249584197998047	0.310197295531688	0.0134017682270981	0.0536963811595273	35.9714513538167	24	13.1035643815994	25	6.14804068207741
dgrp338_10_1wf_9100_20s_111214	1	111214	dgrp338	0.673078491374529	0.484289670432055	0.407526016235352	0.229787267581003	0.563859136414736	83.1801978387885	0.450091429938614	0.719514405285871	0.632243156433105	0.236000816737943	0.373275399403889	1.50422695220305	1.58166994743233	0.400111902974399	0.25296801246299	0.573604036057085	0.551417900318729	0.215390177894435	0.39061150856716	3.7037037037037	NA	0.373275399403889	0.485710823945432	0.235224734853815	0.232966423034668	0.326921508625471	0.00744439371616551	0.0319547925370245	45.7415036509514	27	13.0758211016655	27	6.35106784105301
dgrp338_11_1wf_9100_20s_111214	1	111214	dgrp338	0.753034921913529	0.68854961792628	0.391096353530884	0.609359810769619	1.55808103365888	70.5291540058006	0.44174404142762	0.914366117545537	0.657324314117432	0.592786457221576	0.901817328965674	1.40617803134533	1.52131904833411	0.602046666855854	0.39573991235771	0.529299094102305	0.510352803044666	0.349294773098602	0.684418251481675	23.8095238095238	NA	0.901817328965674	0.330078548200592	0.227275458249179	0.216408729553223	0.248560673769564	0.0251119398732771	0.11603940342481	39.3733204768072	21	14.4595419764519	22	5.00006008148193
dgrp338_12_1wf_9100_20s_111214	1	111214	dgrp338	0.492042792058788	0.206906032303105	0.207992076873779	0.00795687570682887	0.0382556673620675	56.0978845969258	0.398734203057802	0.420504142408786	0.424188613891602	0.00888245543231044	0.0209398723620156	2.37897709615276	2.40344732740442	0.0518952186273287	0.0215919933154402	1.03397990285217	1.03995928417172	0.0471205623603645	0.0453100069181014	NA	NA	0.0209398723620156	1.03261542075998	0.21365435960445	0.216293096542358	0.508090974753703	0.00468602517955513	0.0216651629407757	33.729739288942	46	9.51767748594284	47	10.0417549014091
dgrp340_01_1wf_9100_20s_021214	1	21214	dgrp340	0.578069376272098	0.375766968727112	0.366058349609375	0.151950030425624	0.415097840515784	91.9702130982689	0.407693820381449	0.650037840008736	0.640607833862305	0.151606398750656	0.236660232261916	1.61460170145096	1.60262882383059	0.342974033668148	0.214007154100956	0.858272941729638	0.78574567329081	0.389268985708054	0.495413463847332	NA	NA	0.236660232261916	0.729896169987213	0.274270871281624	0.274548530578613	0.421930623727902	0.00339784088060905	0.012376102955088	54.4745255589397	30	11.2730090618134	30	8.22812613844872
dgrp340_02_1wf_9100_20s_021214	1	21214	dgrp340	0.718120529026693	0.517347258550149	0.507505416870117	0.0635550729628691	0.125230334199831	82.5171620406931	NA	0.720418422310441	0.715496063232422	0.0635992461356465	0.0888883243442625	1.39827416933405	1.39763172907236	0.117476231240114	0.0840537809756832	0.399547454393103	0.39347983778522	0.0439580506836132	0.1117161451805	NA	NA	0.0888883243442625	0.392523900347693	0.203071163760291	0.199759483337402	0.281879470973307	0.00525091377194903	0.0262861801813935	38.0493614433935	27	13.968375980854	27	5.48292142152786
dgrp340_03_1wf_9100_20s_021214	1	21214	dgrp340	0.636358128214808	0.328961369153616	0.34940242767334	0.130107637655149	0.372371876525107	NA	0.435370902134164	0.516943768875019	0.524138450622559	0.138189075183622	0.263649947870615	2.09900236364831	1.907892845511	0.686884825039202	0.360022747952195	0.729254704315267	0.525002077655602	0.530959801363534	NA	NA	NA	0.263649947870615	0.571704320898698	0.188068636153874	0.183032035827637	0.363808691539414	0.0280137983552722	0.153054071810976	32.9053274619981	37	12.1715706586838	38	7.1466081738472
dgrp340_04_1wf_9100_20s_021214	1	21214	dgrp340	0.77729197248274	0.907374203205109	0.790353775024414	NA	0.7604010177112	72.3792451032411	0.394528060280503	1.16735311225057	1.04827833175659	NA	0.574978108108296	0.958408006358453	1.01863525397977	0.232604903924078	0.228349552025908	0.339360001616935	0.356227501989575	0.101123368754154	0.283872997422624	12.5	NA	0.574978108108296	0.285838541443255	0.259362518787384	0.257909774780273	0.222180003690017	0.00451757859079517	0.0175161201030241	43.8236019280923	16	14.5179872512817	17	4.40916281938553
dgrp340_05_1wf_9100_20s_021214	1	21214	dgrp340	0.561292378622655	0.276215234771371	0.274538516998291	0.030211589338454	0.110044993572403	97.327571889984	0.421831901160688	0.49210579956416	0.474294662475586	0.0748850127097097	0.157887108235304	2.06497165182999	2.10866955309903	0.229665732235532	0.108914994242698	0.800577133477128	0.727488810430625	0.292908769026957	0.402629930285216	NA	NA	0.157887108235304	0.780912167655528	0.215699837724792	0.199679374694824	0.438320048078744	0.0525531751235852	0.263187798959726	56.2716972042785	40	11.0486093908548	41	8.84369334671646
dgrp340_06_1wf_9100_20s_021214	1	21214	dgrp340	0.587931195145374	0.317530070741971	0.316143989562988	0.0519192457519255	0.164226578603295	93.3340174026309	0.446531299124519	0.540080324643188	0.524125576019287	0.102474859025973	0.195515852907362	1.90208261766978	1.90794144672799	0.276015756971227	0.144666785998375	0.701762146643058	0.65834854634058	0.11987142154455	0.182078964419157	NA	NA	0.195515852907362	0.700879300600363	0.222550253901217	0.199769973754883	0.412068804854626	0.0605160928006362	0.302928871957951	51.6574573593237	36	11.431082546711	36	8.0118091404438
dgrp340_07_1wf_9100_20s_021214	1	21214	dgrp340	0.806890782907897	0.847709970341788	0.82371187210083	0.240780010579937	0.292310963014096	94.2175839480083	0.43517090798161	1.05058824353748	1.02332353591919	0.242136782210815	0.236618013474417	1.00464774164732	1.00153968999889	0.233910523846544	0.233550927818749	0.259748679501938	0.252387190591444	0.0766602041315392	0.303740470948203	33.3333333333333	NA	0.236618013474417	0.239120628591695	0.202704940971575	0.199664115905762	0.192944231213781	0.00572087781968008	0.0286525087080757	53.21683239352	18	15.2587794661522	19	3.85139387845993
dgrp340_08_1wf_9100_20s_021214	1	21214	dgrp340	0.698887230537935	0.434773301885974	0.366185665130615	0.195700595158437	0.534429973081092	89.9088040093436	0.347074211961899	0.622093640988873	0.549211144447327	0.194203512609762	0.353604464463645	1.74449831189933	1.82079335080919	0.49487984862978	0.271793528029881	0.512958111403092	0.49948759484704	0.213298777310184	0.427035184678617	NA	NA	0.353604464463645	0.431136119178794	0.187446474097669	0.191272735595703	0.301315528317741	0.00762542272966537	0.0398667520800422	58.7037767093638	31	13.4779723584652	32	5.99828717112541
dgrp340_09_1wf_9100_20s_021214	1	21214	dgrp340	0.428294140575869	0.172854513538127	0.182949066162109	0.0298872095534955	0.163363553476751	94.0796869380706	0.401179922738975	0.403588322048285	0.349411010742188	0.129621402074365	0.370971143121776	2.65438219528502	2.86195903751256	0.652221728188907	0.227893453274502	NA	1.04958398276336	0.793610394435614	0.756119002832134	NA	NA	0.370971143121776	NA	0.227617354691029	0.174713134765625	0.563983996206404	NA	NA	56.3368054009485	49	8.46987116336823	50	11.3808677345514
dgrp340_10_1wf_9100_20s_021214	1	21214	dgrp340	0.69371958074223	0.608105816624381	0.524055480957031	0.413973364701184	0.789941866355801	80.6619343696269	0.429953426740584	0.876587361097336	0.782045364379883	0.422455131143543	0.540192615908574	1.33696805775996	1.32085924578546	0.473081345855652	0.358161815776465	0.628930761113588	0.542581693681466	0.365551896347901	0.673726925557694	18.1818181818182	NA	0.540192615908574	0.445505966699723	0.27091476969097	0.266215801239014	0.309056212437094	0.0231932781364933	0.0871220942879717	45.9810592798818	22	13.3783279657364	23	6.2310397028923
dgrp340_11_1wf_9100_20s_021214	1	21214	dgrp340	0.69422590863883	0.507192717658149	0.490872383117676	0.1151583238945	0.234599313090492	100.935545975684	0.442501360164404	0.730587423123695	0.715490229427814	0.116007672933135	0.16213732649558	1.39396785289858	1.39764312477015	0.165490216452462	0.118406632937631	0.452592779556532	0.46578608196475	0.0671965748742431	0.144264883550832	NA	NA	0.16213732649558	0.440453298495732	0.223394705465546	0.224632263183594	0.30577409136117	0.00752006628848339	0.0334772315512718	56.2714295925073	27	13.69420337677	27	6.03165704756975
dgrp340_12_1wf_9100_20s_021214	1	21214	dgrp340	0.799064579620862	0.734120496681758	0.707169532775879	0.257552722219936	0.364202231972515	110.086968461303	0.395657668613858	0.91872486330214	0.898516654968262	0.255734986894221	0.284619083553053	1.15988771668657	1.11294542451784	0.283382616584231	0.254624000729417	0.27400364191596	0.268286852589641	0.0788220752998067	0.293797756166491	9.52380952380952	NA	0.284619083553053	0.251463305349459	0.184604366620382	0.183032512664795	0.200935420379138	0.0105845594015416	0.0578288482600143	66.5302151751368	21	15.4165304303169	21	3.87669169902802
dgrp348_01_1wf_11440_20s_270115	1	270115	dgrp348	0.49607941924932	0.156734068066843	0.161428928375244	0.0183650434135043	0.113765504103543	81.2856789969795	0.308371114351116	0.31594551594988	NA	0.00647471616533878	0.0205412334085022	NA	NA	0.064671662748836	0.0203848377427346	1.04489557784008	0.999839122374247	0.273152551005033	0.273196502209672	NA	NA	0.0205412334085022	1.01447581632147	NA	NA	0.503260573803235	0.0146464420842766	0.0952415092190182	56.2195235838939	NA	9.71751222014427	NA	10.0171840637922
dgrp348_02_1wf_11440_20s_270115	1	270115	dgrp348	0.591675799100856	0.358922423794866	0.284479141235352	NA	NA	88.2144039769017	0.418768390551893	0.606620085425675	0.530491828918457	NA	NA	2.00534046864959	1.91278095639413	0.74027305081936	0.387014021832842	1.2565150784656	0.882342640121707	0.926144324390983	NA	6.25	NA	NA	0.690114757980058	NA	0.246033668518066	0.408324200899144	0.0126745180698055	0.0515153805824537	51.273	32	11.4855175614357	32	7.9263251721859
dgrp348_03_1wf_11440_20s_270115	1	270115	dgrp348	0.621822843378459	0.353209392513548	0.345982998609543	0.0316956136614108	0.0916103212839679	70.7885346224938	0.400810825598481	0.568022542553289	0.568876028060913	0.030807999462835	0.0541559108543351	1.76560721222606	1.75785223963229	0.0947566596247591	0.0539047921596529	0.609732894915106	0.62210571579783	0.0505030763879198	0.0811808589849576	NA	NA	0.0541559108543351	0.608175078559106	0.214813150039741	0.215246081352234	0.378177156621541	0.00367247807540789	0.0170617650845785	42.4157236175454	35	12.3623287379742	35	7.51846025139093
dgrp348_04_1wf_11440_20s_270115	1	270115	dgrp348	0.474457060028544	0.154928246797141	0.161463975906372	0.0290472483358739	0.179899251042335	77.8804514664443	0.35180376796295	0.326537973294824	NA	0.0576757618473406	0.182981010235141	NA	NA	0.40787771663399	0.128563384895452	1.20421241521051	0.91334462557585	0.809567627378191	0.886376954227733	NA	NA	0.182981010235141	NA	0.171440706153711	NA	0.525025326836707	NA	NA	50.4818151898935	NA	9.14076656103134	NA	10.2864423692226
dgrp348_05_1wf_11440_20s_270115	1	270115	dgrp348	0.5862014145202	0.294894955097101	0.3228759765625	0.108998954081757	0.33758768689518	89.4640409779595	0.315422936247462	0.503060804345669	0.515086650848389	0.125452688446622	0.243556473925292	2.11140126212738	1.9414209208352	0.554687737902507	0.285712249182871	0.816765384972946	0.694407403961781	0.390151018672039	0.561847434871982	NA	NA	0.243556473925292	0.705196239507388	0.207958813384175	0.199883937835693	0.413387033113556	NA	0.273324433256873	61.2450304841282	39	11.5009032487869	40	8.31835253536701
dgrp348_06_1wf_11440_20s_270115	1	270115	dgrp348	0.578174436451551	0.26669533763613	0.269075393676758	0.0162201444003094	0.0602810393721649	NA	0.36698995462402	0.461271410187085	0.461272239685059	0.0164351649807408	0.0356300760521859	2.1707024931718	2.16792163381423	0.0781915369461114	0.0360675108022893	0.732426947899958	0.735283601258018	0.0530041340652052	0.072086653332835	NA	NA	0.0356300760521859	0.728703008516752	0.194341694892839	0.192197799682617	0.421317451289722	0.00683734010354945	0.0355744972878992	NA	42	11.2012041807175	43	8.35669288039207
dgrp348_07_1wf_11440_20s_270115	1	270115	dgrp348	0.578393988239611	0.26944324303241	0.276771545410156	0.0439729378894355	0.158878102242305	62.4492276733668	0.320569798927018	0.465847239962646	0.476624488830566	0.0520413019583269	0.10918721798373	2.18317656211503	2.1323106033839	0.349950112059422	0.164117793863645	0.775322706601787	0.70258573004214	0.333775309813305	0.475067021064156	NA	NA	0.10918721798373	0.728562755002231	0.196306311460428	0.192211151123047	0.421396317548579	0.0132042224200407	0.0686964431714359	42.429891314968	42	11.3166162073612	43	8.44117139279842
dgrp348_08_1wf_11440_20s_270115	1	270115	dgrp348	0.606751026201033	0.339583387545177	0.322894096374512	0.092306955694795	0.285873779456568	71.0343337900765	0.36386380334052	0.559675011464528	0.538153171539307	0.0940658028179831	0.174793734930377	1.8325896881798	1.85820701778947	0.285259731687765	0.153513429320223	0.68362259317682	0.666658298358729	0.164796711707695	0.247198170507161	NA	NA	0.174793734930377	0.648122470037114	0.220091623919351	0.215276718139648	0.393248973798967	0.00861172330810023	0.0400030406563234	45.1875109294593	35	11.8854185640812	35	7.70320683717728
dgrp348_09_1wf_11440_20s_270115	1	270115	dgrp348	0.634876954459702	0.370648042722182	0.246034622192383	NA	NA	76.8125925226944	0.325243851195444	0.583810831561233	0.45358943939209	NA	NA	1.9300371044874	2.20463686575292	0.633777947177819	0.287474983759456	0.759408523450838	0.843600040312265	0.352966810974221	0.418405398420284	3.03030303030303	NA	NA	0.575108362298373	0.213162788839051	0.207603454589844	0.365123045540298	0.0128227352004364	0.0617655193925839	51.8297691103069	33	12.231385409832	33	7.03437203168869
dgrp348_10_1wf_11440_20s_270115	1	270115	dgrp348	0.618446463813584	0.339552473690775	0.330598831176758	0.0749296336718362	0.226648211081467	76.2232936837552	0.379877653895676	0.549041014151751	0.538151741027832	0.074699514600884	0.13880753123313	1.85176555317226	1.85823830156747	0.230590576831714	0.124090961120113	0.643155320652266	0.627827747552314	0.127246269974943	0.202677040750481	NA	NA	0.13880753123313	0.616801146281168	0.209436354995076	0.20757007598877	0.381458487793754	0.00379250509452001	0.018270962596387	47.2677677069692	36	12.2238890528679	37	7.74914513481781
dgrp348_11_1wf_11440_20s_270115	1	270115	dgrp348	0.680394327110575	0.416827231645584	NA	0.112668897281444	0.244258349878405	78.6538316233297	0.358900003624972	0.612625965615734	0.661148071289063	0.114512349437755	0.173202274060161	1.6881237172399	1.5303054405457	0.371178346743985	0.242551804959684	0.50813651349744	0.43333553866638	0.178870670426659	0.41277636950144	NA	NA	0.173202274060161	0.470031446649824	0.195921906693415	0.199863433837891	0.319806729864117	0.00640416273316013	0.0320426934041099	50.4249711685987	32	13.3384714126587	33	6.4654229208827
dgrp350_01_1wf_9100_20s_111214	1	111214	dgrp350	0.397640235554645	0.104275008042653	0.108057022094727	0.00623607918384378	0.0577110035327183	92.240450894659	0.438693878164214	0.2622345495224	0.266108512878418	0.00629447320319777	0.0236537836956522	3.81472976330098	3.75786550074363	0.0912651517992011	0.0242864338229085	1.51951425143546	1.462653269079	0.0977419622984071	0.0668251077440611	NA	NA	0.0236537836956522	1.5148492187399	0.15796091446751	0.158073425292969	0.602365000169505	0.0025223191929803	0.015956630207168	51.7751297680653	75	7.82062560319901	76	12.0050294995308
dgrp350_02_1wf_9100_20s_111214	1	111214	dgrp350	0.613926850003852	0.245687701264206	0.249585151672363	0.00661570529783247	0.0265068064085682	96.9253901204426	0.401578653365283	0.400190513352959	0.39933967590332	0.00490167084403061	0.0122744398811434	2.49917361716403	2.50413384980585	0.0305657355953051	0.0122061109463757	0.629837170463715	0.633332951241226	0.0237320892524583	0.0374717424791295	NA	NA	0.0122744398811434	0.628858552112073	0.154502812088752	0.158060073852539	0.386073149996148	0.00544466065148698	0.0344467803840617	58.0022224789706	49	12.0386973619461	49	7.57063779234886
dgrp350_03_1wf_9100_20s_111214	1	111214	dgrp350	0.411753433162845	0.174706655999889	0.174659729003906	NA	0.221903191886377	91.1650503909875	0.457956668263804	0.424299209014229	0.349422454833984	NA	NA	2.72933501224418	2.8618809259977	NA	NA	1.56819359839849	1.04805131004367	NA	NA	NA	4.34782608695652	NA	1.42863791643119	NA	0.18303108215332	0.588246566837155	NA	NA	49.4154076518291	46	8.03650617599487	46	11.4812574386597
dgrp350_04_1wf_9100_20s_111214	1	111214	dgrp350	0.493415677422709	0.178416788026139	0.174717903137207	0.0102558595119755	0.0586995340936614	91.5809314679994	0.41793661179268	0.361595296197467	0.357840538024902	0.0101535554354523	0.0283745254003215	2.7674034309213	2.79463022139543	0.077084768480779	0.0275831728615203	1.02976769133866	1.04716595103907	0.0616908890070432	0.0589122373066363	NA	NA	0.0283745254003215	1.02667411000343	0.183175897056406	0.183031558990479	0.506577101479699	0.00250266458055485	0.0136734047087751	53.3059072654461	54	9.63450655341148	55	10.0746743381023
dgrp350_05_1wf_9100_20s_111214	1	111214	dgrp350	0.580086929171134	0.286186608672142	0.282942771911621	0.00715841795677596	0.0252998792243823	92.2480737366613	0.406926478850936	0.493351244926453	NA	0.00695251007231904	0.0141637653448557	2.02730599921036	2.03724082190929	0.0285770777754288	0.0140273439782374	0.724490068693188	0.734816168617533	0.0208723646486219	0.0284048793971024	NA	NA	0.0141637653448557	0.72387955961853	0.207164636254311	NA	0.419913070828866	0.0026213488234265	0.0126036676534636	54.7098899102202	40	11.4474643468857	40	8.28658545017242
dgrp350_06_1wf_9100_20s_111214	1	111214	dgrp350	0.582629838337564	0.254965831836065	0.249710083007813	0.0113790793827559	0.0455691626292876	NA	0.488372093023256	0.437612039513058	0.432708740234375	0.0111235313082307	0.0257067405252912	2.28631462238913	2.31102334438254	0.0575469698405937	0.0249010768240289	0.717507501105146	0.710217027454389	0.0306861122535034	0.0432066693240103	NA	NA	0.0257067405252912	0.716355624444727	0.182646207676993	0.183030605316162	0.417370161662436	0.00176563248579537	0.0096466516228008	NA	45	11.4734624326229	45	8.21907934546471
dgrp350_07_1wf_9100_20s_111214	1	111214	dgrp350	0.472332309460588	0.157518096899582	0.158071398735046	0.00460284689801103	0.0291187838840229	82.4552939906213	0.377563045602917	0.333489989451433	0.332786560058594	0.00497149246474505	0.0149389821027319	2.99924436825037	3.00492904468236	0.0446622151081577	0.0148629849304407	1.11916007226906	1.10541876082274	0.0459576338455967	0.0415748632775071	NA	NA	0.0149389821027319	1.11790888997457	0.176090880855918	0.174718856811523	0.528024487768208	0.00371990768528242	0.0212908197384512	51.3232220654384	59	9.29356771707535	60	10.5654528513551
dgrp350_08_1wf_9100_20s_111214	1	111214	dgrp350	0.404014041394228	0.111772480145307	0.108170509338379	0.00565182605317198	0.0522492321404529	NA	0.488819541892637	0.276654939416429	0.274553298950195	0.00462291110718891	0.0168379368409174	3.61540729088407	3.64228003751433	0.0598770139425903	0.016439431709225	1.47790473143697	1.53755747468469	0.0955761167691246	0.0621610042829291	NA	NA	0.0168379368409174	1.47516149822185	0.164882459271122	0.166393280029297	0.595985958605772	0.00355817986203596	0.0213841560272715	54.6875	71	7.93584609031677	71	11.7066546082497
dgrp350_09_1wf_9100_20s_111214	1	111214	dgrp350	0.428252136680991	0.13948732316494	0.141435623168945	0.0294108644826833	0.207945239139308	89.0919706443004	0.417902024755224	0.325713081657886	0.31614875793457	0.0579078609228042	NA	3.1426113489135	3.1630870215744	NA	0.136060818483293	1.39955157701657	1.2352937210055	NA	NA	NA	NA	NA	1.33370964763568	0.186035588627956	0.174715042114258	0.57116400631203	NA	NA	51.8602557226142	60	8.36923938989639	61	11.3481709063053
dgrp350_10_1wf_9100_20s_111214	1	111214	dgrp350	0.527832180199557	0.200144711022194	0.199678421020508	0.00682911200676187	0.0342005509251322	NA	0.544122866464882	0.379182472251929	0.382693290710449	0.00798866219127168	0.0208748425571851	2.63820740768792	2.61351451722651	0.0561844927248121	0.0214976776882172	0.896559630854653	0.880006946749042	0.0442319194829345	0.0502631480880212	NA	NA	0.0208748425571851	0.894918012036187	0.179113106907539	0.182944297790527	0.472366525392914	0.0056489132215364	0.0308777769504708	NA	52	10.4075249731541	53	9.49299466609955
dgrp350_11_1wf_9100_20s_111214	1	111214	dgrp350	0.505664051722597	0.184871203645512	0.18303394317627	0.0156792280530329	0.0856629528979397	87.2547840616379	0.427075896359065	0.365600843120504	0.366064071655273	0.0172003294012874	0.0469872099807848	2.74102155996341	2.73177645084982	0.124308774896262	0.0455047391808327	0.986236274941924	0.998770162582665	0.0893050021465948	0.0894149680199355	NA	NA	0.0469872099807848	0.977833855749957	0.180773321877826	0.183029174804688	0.494455429410053	0.00488415454224352	0.0266851148045412	49.9903689468972	54	9.98304499685764	55	9.94253270328045
dgrp350_12_1wf_9100_20s_111214	1	111214	dgrp350	0.412482150726946	0.142445377090521	0.133121132850647	NA	NA	90.1968733259582	0.364169216621196	0.345337069348285	0.324460029602051	NA	NA	3.09579272272108	3.08204373039877	NA	NA	1.54916181876722	1.3750035821751	NA	NA	NA	NA	NA	1.42434732809076	0.202891692257764	0.174716949462891	0.587517849273054	NA	NA	57.3499486251627	57	8.1193864941597	57	11.5648264586926
dgrp352_01_1wf_9100_20s_031214	1	31214	dgrp352	0.75303025994095	0.537579724421868	0.532460689544678	0.0702158508182219	0.131870487712934	68.6433832390275	0.378702677702293	0.713888608492338	0.715499877929688	0.0869676714138768	0.121548128932627	1.4212301567758	1.43093655754036	0.169475687798313	0.118436898481108	0.33048198256041	0.324690980332608	0.0559629343826293	0.172357526917754	NA	NA	0.121548128932627	0.330150100609865	0.177482000103703	0.18303394317627	0.248613016081777	0.0308807798269453	0.168716136969227	42.6479501998631	26	13.9770728349686	27	4.79201400279999
dgrp352_02_1wf_9100_20s_031214	1	31214	dgrp352	0.526600719601169	0.274550575198549	0.27454662322998	0.0540823579346756	0.196987882416504	76.8171784580116	0.388430398962204	0.521363843571056	0.482538223266602	0.125050462618484	0.259151413481692	1.98903639017	2.07237468822755	0.331059083793054	0.159748662089769	0.955917480709294	0.766695069714836	0.580437823649273	0.757064766133374	NA	NA	0.259151413481692	0.891248295980189	0.244692732306088	0.19135856628418	0.469331994006483	NA	NA	46.9790511824153	33	9.06016898155212	34	8.31955289840698
dgrp352_03_1wf_9100_20s_031214	1	31214	dgrp352	0.486409972995494	0.173201657425274	0.174713134765625	0.021576190390886	0.123494953140359	64.0815520450309	0.38267193827696	0.356081632863392	0.332785665988922	0.0665757432191156	0.200055921943861	2.87886879571022	3.00493711779428	0.431343179070029	0.143544827116598	1.08197022460209	0.904744748678982	0.457459051892447	0.505622223903906	NA	NA	0.200055921943861	1.05331366748041	0.1824356729963	0.1580810546875	0.512342272554928	0.0661820841845859	0.418659176556083	39.559340316163	55	9.52609115839005	56	10.2163976877928
dgrp352_04_1wf_9100_20s_031214	1	31214	dgrp352	0.680798177174521	0.436504909396172	0.374441146850586	0.263658400185827	NA	78.18747501998	0.360199212314237	0.641166389733553	0.590688705444336	NA	0.444256928718982	1.71565397264669	1.76761843112266	0.427272182617025	0.24172195485971	0.564815575216214	0.565281588528622	0.199078509681868	0.35217582479566	6.66666666666667	NA	0.444256928718982	0.469110407321216	0.204768995844549	0.207912921905518	0.319369510197881	0.0084250297721012	0.0405219151117977	50.0244081049441	30	13.0951472818851	31	6.34783887118101
dgrp352_05_1wf_9100_20s_031214	1	31214	dgrp352	0.621639047280486	0.355789740295971	0.324459075927734	0.13191923073946	0.406582033072306	62.2063413668574	0.339248110152602	0.572341364096193	0.532584190368652	0.132715072391771	0.249190784840809	1.83080794204736	1.87811160028228	0.388007327438791	0.206594393741285	0.694963287424043	0.684004363385257	0.254125942886415	0.371526786216248	NA	NA	0.249190784840809	0.60865055754581	0.216551623800222	0.216313362121582	0.378360952719514	0.00514947847006987	0.0238056420535664	41.1029576186435	34	12.096851170063	34	7.36275520920753
dgrp352_06_1wf_9100_20s_031214	1	31214	dgrp352	0.774546928703332	0.731710840761661	0.690605163574219	0.126404543316154	0.18303446018554	71.875	NA	0.944695296883583	0.906900405883789	0.124115637995159	0.13685696597986	1.07181471618284	1.10273605425257	0.11191390903636	0.101487485246154	0.296021542296572	0.301313616993949	0.0360607165214951	0.119678350023654	5	NA	0.13685696597986	0.290752362553113	0.212746655657178	0.216293334960938	0.225201349428751	0.00702560022664166	0.0324818156227998	54.7098168750362	20	14.6342168152332	21	4.46767976880074
dgrp352_07_1wf_9100_20s_031214	1	31214	dgrp352	0.517050497555124	0.20200560092926	0.208010673522949	0.0339383581236293	0.163156810892615	77.4637650325166	0.353977058582733	0.39068834066391	0.382708072662354	0.0660540655580831	0.172596478298903	2.62592362411885	2.61296094174404	0.413771298952002	0.158353419043389	0.967794920168762	0.840023109301494	0.356639517557331	0.424559174156397	NA	NA	0.172596478298903	0.932691469162241	0.188408900709713	0.174631118774414	0.482248588195756	0.0552819765622322	0.316564292493852	50.0433693395624	50	10.100280046463	51	9.60885393619537
dgrp352_08_1wf_9100_20s_031214	1	31214	dgrp352	0.459145569176906	0.189961584284902	0.149745941162109	0.162963956356969	NA	81.3851040194089	0.327766210607915	0.413728449183206	0.366069793701172	0.16719145706809	0.456720166331372	2.60854528194143	2.73179780169393	0.539475673817119	0.197480089295994	1.45986968625671	NA	0.473953418159656	0.327969282009895	NA	NA	0.456720166331372	1.17795851061498	0.223766864898304	0.216314315795898	0.540854430823094	0.0424051049260139	0.196034667284919	54.7098168750362	48	9.11815604567528	48	10.7408095151186
dgrp352_09_1wf_9100_20s_031214	1	31214	dgrp352	0.679022116082998	0.457586178491856	0.449334859848022	0.0359328173389153	0.0799689063765692	62.5195281991955	0.29977250060735	0.673889947990919	0.665648937225342	0.0364475221362513	0.0547548716718115	1.48788451038174	1.50229339232231	0.0767013014121005	0.0510561397687653	0.474607097290448	0.47275080555405	0.0337230458289755	0.0713336612709799	NA	NA	0.0547548716718115	0.472706711065692	0.216304057464004	0.216310501098633	0.32097831123446	0.0030151466355126	0.013938974854197	43.7778928941309	29	13.2699991762638	30	6.48912172392011
dgrp352_10_1wf_9100_20s_031214	1	31214	dgrp352	0.712136807344378	0.509964581440996	0.499172210693359	0.0536124725128785	0.107402758736128	65.6993626300895	0.38119586940923	0.716104793603773	0.715487957000732	0.0546665597237602	0.0764045840169247	1.40421756474443	1.39764756375763	0.10243743386584	0.0732927502770676	0.411072211864528	0.416659661457338	0.0381622156377526	0.091590857402115	NA	NA	0.0764045840169247	0.404354024736792	0.206206230978881	0.207984924316406	0.287955384212909	0.00831942423526642	0.0400001310797417	40.6550369726803	27	13.7690436989069	28	5.77377446740866
dgrp352_11_1wf_9100_20s_031214	1	31214	dgrp352	0.614430305092118	0.293618851318592	0.291184425354004	0.0177214973231223	0.0608600453186246	84.5508728996184	0.376058121499387	0.4778716949428	0.482536792755127	0.0237125140256739	0.0491413595433483	2.09768896393625	2.07238083191611	0.107630072121558	0.0519354698055395	0.630701265492709	0.628322743351238	0.065601282642738	0.104406984049066	NA	NA	0.0491413595433483	0.626757120829691	0.184027705873762	0.183030128479004	0.385098568970044	0.0115582706185185	0.0631495520140247	52.7548304658544	41	12.0383729040623	42	7.729163646698
dgrp352_12_1wf_9100_20s_031214	1	31214	dgrp352	0.717150470923115	0.474228316339953	0.474214553833008	0.0190481240103939	0.0401677339011018	86.0652459620026	0.346426082081563	0.661267524135524	0.657251358032227	0.0202731852031389	0.0308454063356152	1.51361028403507	1.52148791749011	0.0460555327592107	0.030270061450889	0.395636033818388	0.396894928066229	0.0181029642019876	0.045611477803936	NA	NA	0.0308454063356152	0.394710710489947	0.187182995676994	0.191242218017578	0.283066971906263	0.00580354445912359	0.0303465653101249	56.25	29	13.7526211738586	30	5.61548987030983
dgrp354_01_1wf_9100_20s_031214	1	31214	dgrp354	0.802645308196836	0.757921317219734	0.757201194763184	0.301536072864915	0.398224507502554	73.2586601413292	0.321653736512161	0.944279259443283	0.956876754760742	0.306019260985426	0.319810528851172	1.18724431457367	1.14472612624808	0.411516363843782	0.359488924388015	0.292621370831828	0.253165474879935	0.13121156140608	0.518283788373226	25	NA	0.319810528851172	0.246721667613573	0.186995611304329	0.183032512664795	0.198029988940534	0.0117764775715243	0.0643409053400894	49.6947383749961	20	15.1584263443947	21	3.9269078373909
dgrp354_02_1wf_9100_20s_031214	1	31214	dgrp354	0.911442253754182	NA	1.22298717498779	NA	1.7528947374861	59.4571799701264	0.316229982768995	NA	1.41434478759766	NA	1.51778803053155	0.976424948554663	0.903684628736209	0.607494167369014	0.672241341781575	0.223255850673128	0.166661974549959	0.174984755259128	1.0499380901471	50	NA	1.51778803053155	0.0977110496755476	0.177082198006766	0.18303108215332	0.0890579793329679	0.014414772402156	0.0787558715851392	40.6550369726803	6	10.8738284111023	7	1.23957538604736
dgrp354_03_1wf_9100_20s_031214	1	31214	dgrp354	0.849823528069183	1.092854985169	0.806995391845703	1.26247192519368	1.56441032743228	87.5557857882619	0.284164556503658	1.28597873449326	0.981710433959961	1.27030114107056	1.2939672403669	1.21680576536936	1.0927091569633	0.714460101394817	0.653842879271133	0.369102392431664	0.264360754944698	0.354885154835528	NA	42.8571428571429	NA	1.2939672403669	0.17610014568313	0.192451922098796	0.191346883773804	0.149654047097934	0.0121489453826273	0.0634917336672641	62.6755347504112	14	15.299969792366	15	2.88677883148193
dgrp354_04_1wf_9100_20s_031214	1	31214	dgrp354	0.786670459391741	0.739256411790848	0.690545082092285	0.268748838353803	0.3891836251147	85.9517033717192	0.362703578894198	0.939728196178164	0.86524486541748	0.277859197217243	0.321133598502403	1.14281357879526	1.15574219503458	0.291921167739988	0.2525832914937	0.304055062463473	0.295790476498038	0.0952078095935626	0.321875845093999	9.52380952380952	NA	0.321133598502403	0.271180311986302	0.200471784387316	0.207987785339355	0.213329540608259	0.0155048902795319	0.0745471194581638	54.7767129467441	21	15.5243846476078	21	4.20990747213364
dgrp354_06_1wf_9100_20s_031214	1	31214	dgrp354	0.6910023983064	0.386982771328517	0.415974140167236	0.142420616253981	0.342378533907715	89.0762050858702	0.345077808497012	0.560031010423388	0.590694427490234	0.143646499445835	0.243182418456469	1.93230520796882	1.6929226914309	0.655597651111217	0.387257879187083	0.549292090079195	0.425555422765199	0.324623278986976	0.762822564632403	NA	NA	0.243182418456469	0.447172980080724	0.17304823909487	0.174712181091309	0.3089976016936	0.00705238171751099	0.0403657127594627	58.3379834456077	NA	13.5443969964981	NA	6.05668836832047
dgrp354_07_1wf_9100_20s_031214	1	31214	dgrp354	0.883743339185923	1.35610220167372	1.33945655822754	0.404527010593662	0.30200830934671	81.3851040194089	0.327766210607915	1.53449779086643	1.52249431610107	0.405223731734481	0.266157796090964	0.694310402669902	0.656816901990728	0.169116622695553	0.257479096812189	0.142908617621183	0.130439395039736	0.0416164605862109	0.319048248985923	77.7777777777778	NA	0.266157796090964	0.131891797534355	0.178858757019043	0.182901382446289	0.116558497564244	0.00579367355759087	0.0316764886087848	54.7098168750362	9	12.2049198150635	10	1.78858757019043
dgrp354_08_1wf_9100_20s_031214	1	31214	dgrp354	0.812420788009613	0.779423807796679	0.490940093994141	0.835252241401122	1.7013323043261	87.7229302976137	0.304428438653279	0.959384372359828	0.673969268798828	0.836360953903629	1.24094820435095	1.38960327487418	1.48374717705191	0.500357941964378	0.337225876283418	0.355740550073683	0.37281366310015	0.165868400252816	0.444909660428027	15.7894736842105	NA	1.24094820435095	0.231615396885074	0.180526554584503	0.183115005493164	0.188169163252531	0.0164427461513565	0.0897946408437311	61.0175755930207	19	14.8090523481369	20	3.61053109169006
dgrp354_09_1wf_9100_20s_031214	1	31214	dgrp354	0.766289195831685	0.748770383000374	0.74868106842041	0.0779610546884596	0.1041311954808	88.1809441220154	0.290344678707158	0.977138118445873	0.981647729873657	0.0624491837845121	0.0636166945473908	1.02771482563271	1.03619041595805	0.0686381108896648	0.0662408277789392	0.31069208680244	0.300009298782624	0.0734774768403153	0.244917331357634	NA	NA	0.0636166945473908	0.304990342340217	NA	NA	0.233710804168315	NA	NA	62.578076232815	20	14.9754076600075	20	4.56735470890999
dgrp354_10_1wf_9100_20s_031214	1	31214	dgrp354	0.781416161643603	0.776371717453003	0.482535839080811	0.584826520058461	1.21198566550519	70.3819101847201	NA	0.993544484439649	0.715485095977783	0.5761405998076	0.805244725636452	1.30418121242223	1.39765315255575	0.656153284039596	0.469467895407208	0.452162795553013	0.482057705138123	0.311899812026538	0.647017584621264	36.8421052631579	NA	0.805244725636452	0.279727818652529	0.217172766986646	NA	0.218583838356397	0.0176288113038995	0.0784802026067772	42.2164252690822	19	14.7510626316071	19	4.12628257274628
dgrp354_11_1wf_9100_20s_031214	1	31214	dgrp354	0.898444847767635	1.70091795921326	1.28121852874756	1.04605394943286	0.81645240523911	69.6145919060796	0.303842862059657	1.89318015840318	1.4808874130249	1.04240996931451	0.703908994124847	0.678017012206419	0.675270781022692	0.321245251955774	0.475728050115319	0.13493623418742	0.149347763788143	0.065797193435562	0.440563633272062	77.7777777777778	NA	0.703908994124847	0.1130343754374	0.192262199189928	0.191348791122437	0.101555152232365	0.00480667358733735	0.0251199579529183	48.4626950602213	9	15.3082616329193	9	1.73035979270935
dgrp354_12_1wf_9100_20s_031214	1	31214	dgrp354	0.827545327086622	0.722282942045819	0.416063547134399	0.825761048315179	1.98469934220995	77.6814062218306	0.304874666744343	0.872801668264649	0.557497501373291	0.830515154306503	1.4897199579562	1.65098820652825	1.79397091531223	0.711594756551267	0.39665902634069	0.342988001533189	0.36733166148894	0.165261563402432	0.449897410782837	13.6363636363636	NA	1.4897199579562	0.208346735004847	NA	NA	0.172416366967016	0.0117788612409165	0.0786569645694621	53.998313387718	22	15.890224725008	23	3.46116173267365
dgrp356_01_1wf_11440_20s_260115	1	260115	dgrp356	0.619010017925255	0.359293313587413	0.361322402954102	0.0290360450426361	0.0803604891510824	70.6071705848634	0.354450897213338	0.580432146787643	0.576591491699219	0.0236942679296883	0.0410936829120755	1.72575163702926	1.73433730705139	0.0726174340852747	0.0418704215091437	0.618936083257402	0.619115700916911	0.0561389515935944	0.0906760263234361	NA	NA	0.0410936829120755	0.615482740249852	0.22113883320023	0.215285301208496	0.380989982074745	0.0152515003499563	0.0708432032486315	45.5803956213634	34	12.215972661972	34	7.51872032880783
dgrp356_02_1wf_11440_20s_260115	1	260115	dgrp356	0.731254565646185	0.49122733802631	0.507398128509521	0.0471148845228108	0.0928558500229601	88.4243147770102	0.441853731262818	0.671759686850268	0.684248924255371	0.0481934316177725	0.0704326012207014	1.49662493040127	1.46145644450701	0.121164303626716	0.0829065444147318	0.370538593407103	0.362332598014099	0.036679331802012	0.101231111975701	NA	NA	0.0704326012207014	0.367261100192706	0.180408692608277	0.176835060119629	0.268561356300157	0.00714718803076229	0.0404172567698239	49.3537013584303	29	14.245592802763	30	5.41226077824831
dgrp356_03_1wf_11440_20s_260115	1	260115	dgrp356	0.710105013437711	0.475326134213086	0.468969345092773	0.026396276524892	0.0562857184613424	73.4525519298002	0.345046581281783	0.669374423808065	0.668850898742676	0.0244742529849019	0.0365914930082463	1.49586924143461	1.49510152693198	0.0530679357184032	0.0354945364996725	0.410058254387424	0.409818463559513	0.0277909945124498	0.0678129391025206	NA	NA	0.0365914930082463	0.408110773927926	0.193985716501872	0.192196846008301	0.289801506604164	0.00755537385417509	0.0393106027028601	48.108	29	13.7844578921795	30	5.81957149505615
dgrp356_04_1wf_11440_20s_260115	1	260115	dgrp356	0.653873614376693	0.571008632128889	0.630433082580566	NA	NA	65.6013210019878	0.352892310845593	0.873270643705672	0.86107063293457	NA	NA	1.25620051905245	1.16142852554127	NA	NA	0.623628435465207	0.493279832219094	NA	NA	NA	NA	NA	0.525648593860633	NA	0.269073486328125	0.343707745959678	NA	NA	42.4511192390728	22	12.5621899068356	23	6.90344734489918
dgrp356_05_1wf_11440_20s_260115	1	260115	dgrp356	0.700155272910741	0.552910000085831	0.553539276123047	0.0380996648695386	0.0688291987813153	63.1413699611528	0.28294953880599	0.789696259498596	0.7918701171875	0.0356311519556191	0.0449962073100712	1.26898423994768	1.26283335902574	0.0599057404779312	0.0474375657324633	0.431764991069685	0.4285794032792	0.0333677429129356	0.0778566180680363	NA	NA	0.0449962073100712	0.428254615355136	0.236786259412766	0.23063799738884	0.299844727089259	0.0134084227705059	0.0581362261305984	45.2755484510662	25	13.8227500021458	25	5.91965648531914
dgrp356_06_1wf_11440_20s_260115	1	260115	dgrp356	0.608541422341603	0.344194915464946	0.345959186553955	0.111521706699327	NA	85.0448912677358	0.438841845549769	0.5656063873853	0.553528785705566	0.0462856994772395	0.083619317861203	1.7785716920568	1.80659077869876	0.1370225757441	0.0758459399658805	0.592598622116017	0.594757391906414	NA	NA	NA	NA	0.083619317861203	0.643273511525487	0.221411471920354	0.222911834716797	0.391458577658397	NA	NA	47.7236342292232	35	12.0468220412731	35	7.74940151721239
dgrp356_07_1wf_11440_20s_260115	1	260115	dgrp356	0.766525661061427	0.676884201439944	0.707306861877441	0.113008679977239	NA	72.8872168575671	0.409379901955381	0.883054848421704	0.907183647155762	NA	0.122690006331566	1.15613374103855	1.13108588780031	0.200598773774246	NA	0.317612292722822	0.299980013921338	0.0908447895797651	NA	NA	NA	0.122690006331566	0.304183860647563	0.205897249605345	0.207554817199707	0.23316473486709	0.00578051604504534	0.0278505511124003	43.0486551666157	22	14.8914524316788	23	4.73563674092293
dgrp356_08_1wf_11440_20s_260115	1	260115	dgrp356	0.523130821321345	0.218201473355293	0.222937107086182	0.0144023740730638	0.0646028571075706	65.199	0.351909931328985	0.417106896519978	0.422815322875977	0.0137717265540702	0.032571493531491	2.39966695982955	2.36509876983178	0.0810597794369606	0.034273316814894	0.917400811815317	NA	0.074561615327861	0.0828513781729904	NA	NA	0.032571493531491	0.912393103819725	0.199085519532673	0.199884414672852	0.477300953769144	0.00508127354478581	0.0254210592311675	42.2548243872815	47	10.2554692476988	48	9.55610493756831
dgrp356_09_1wf_11440_20s_260115	1	260115	dgrp356	0.521032418963451	0.188846711949869	0.192191123962402	0.0142107715447112	0.0739408316665611	62.6957661249944	0.342494132846339	0.362447143549269	0.361339092254639	0.00972106166565762	0.0269028784154002	NA	NA	0.0740981393818134	0.0267745544219821	0.923544136532122	NA	0.0928996632752813	0.101355230976092	NA	NA	0.0269028784154002	0.919266371158659	0.1736004315994	0.169140934944153	0.478967581036549	0.0100448227637995	0.059387295967804	41.2228340728776	NA	10.3865691572428	NA	9.54802373796701
dgrp356_10_1wf_11440_20s_260115	1	260115	dgrp356	0.680319143484726	0.465113744139671	0.468952178955078	0.0225971275896524	0.0481864219929705	78.2286590515266	0.424069051186387	0.683669934315341	0.684228897094727	0.0228759600153621	0.0334331977390822	1.46433045317388	1.46150584124402	0.0490359013822423	0.0335516287369083	0.471406236477783	0.475357898161705	0.0209195655698693	0.0440080319497563	NA	NA	0.0334331977390822	0.470226380780681	0.218708752558149	0.215288162231445	0.319904008616635	0.00513077266734039	0.0238321169829327	45.0543058319624	28	13.0231848359108	29	6.34255382418633
dgrp356_11_1wf_11440_20s_260115	1	260115	dgrp356	0.797056064039967	0.769938990473747	0.768778800964355	0.0793556629756555	0.103223011451554	76.9860897005462	0.383505997620526	0.965978461503983	0.984009742736816	0.0828800147417737	0.0842268233150419	1.04252164230451	1.0489955982393	0.088043925609861	0.083931644477479	0.259451358143084	0.254568034542012	0.0328507823529623	0.129045197729021	NA	NA	0.0842268233150419	0.254616889722147	0.196039471030235	0.192198276519775	0.202943935960033	0.0100242004105619	0.0521555166470521	47.461462567035	20	15.3987798094749	20	3.92078942060471
dgrp356_12_1wf_11440_20s_260115	1	260115	dgrp356	0.68433638153834	0.379999710832323	0.376708030700684	0.029085176275374	0.0772088033835516	55.8609362055145	0.371061500606399	0.555282052925655	0.553534030914307	0.0313481314831616	0.056632708618442	1.80661275610706	1.80657365970478	0.101831401313832	0.0563671460428976	0.463509097556223	0.468123630796843	0.0317601316306488	0.0678456064620932	NA	NA	0.056632708618442	0.461269672309502	0.175282342093331	0.176815032958984	0.31566361846166	0.00468267096505506	0.026483443668171	35.133093391818	35	13.2999898791313	35	6.1348819732666
dgrp356_13_1wf_11440_20s_260115	1	260115	dgrp356	0.701328923006908	0.407233370577588	0.407485961914063	0.0391378824201834	0.0960471919973465	57.3746388587679	0.326821483670285	0.580659598112106	0.584307909011841	0.0416147720366206	0.0712206208315714	1.7311132223765	1.71153153627386	0.126815636432578	0.0740948289557465	0.430330819088622	0.433848413218498	0.0468136777643456	0.107903305251387	NA	NA	0.0712206208315714	0.42586447984001	0.173426227534519	0.176794052124023	0.298671076993092	0.00541810613106314	0.030646427670894	38.6233742618986	34	13.845934599638	34	5.89649173617363
dgrp358_01_1wf_11440_20s_200215	1	200215	dgrp358	0.693076272258716	0.577458410159401	0.582812309265137	0.0778069153121399	0.133502525727787	69.413869111295	0.434535129516855	0.833181618348412	0.835865020751953	0.0826187464935185	0.0988422106947289	1.21276566715383	1.19636541208578	0.129454363900097	0.108206374567785	0.452638124227902	0.435897599428557	0.0781739706746006	0.17934021838405	NA	NA	0.0988422106947289	0.443203411874674	0.255931537598372	0.25305500626564	0.307173768554443	0.0157293822848265	0.0621579573427403	39.2511045067524	23	13.2815434336662	24	6.14235690236092
dgrp358_02_1wf_11440_20s_200215	1	200215	dgrp358	0.437725384692217	0.191709010438486	0.199369430541992	0.0346411662486511	0.173753649967691	74.38760037802	0.33576959756701	0.437966398894787	0.437088966369629	0.0729796809427059	0.166967566234536	2.3249498227787	2.32857510859234	0.266685481491838	0.114527326392771	1.33830882817533	1.23051795877373	0.532761672052438	0.432957250443836	NA	NA	0.166967566234536	1.2826587901711	0.245897247393926	0.237709999084473	0.561452312356497	0.0689306760354149	0.289978024908072	49.4105057351167	44	8.43519645929337	45	11.0653761327267
dgrp358_03_1wf_11440_20s_200215	1	200215	dgrp358	0.640254684848132	0.442572883197239	0.475458145141602	0.101883018355789	0.214283884705448	78.6551852073339	0.468785241949186	0.691245052431311	0.720827102661133	0.0989930464076611	0.137332580922944	1.48264748858897	1.38733560900744	0.282537694535933	0.203654899868154	0.611767168714812	0.516167337965563	0.257954324267224	0.499749413211484	NA	NA	0.137332580922944	0.561624062909254	0.248559580794696	0.245407104492188	0.359582437401092	0.00725247484065389	0.029552831633221	41.7827951793558	28	12.3920407295227	29	7.20822784304619
dgrp358_04_1wf_11440_20s_200215	1	200215	dgrp358	0.554898839254042	0.326274052742989	0.406421661376953	0.183068915738215	0.450440842936322	79.6800929028073	0.38458838081434	0.587988349699205	0.621153831481934	0.165633315618183	0.266654260544476	1.86555987645594	1.60990715876971	0.669850848520662	0.416080421080033	1.32159094013754	0.509440027782732	1.52353805735389	NA	NA	NA	0.266654260544476	0.796895565622305	0.260006345808506	0.222395896911621	0.442196424370511	0.127370464839423	0.57271949081884	49.0360549901804	31	10.1144956350327	32	8.32020306587219
dgrp358_05_1wf_11440_20s_200215	1	200215	dgrp358	0.282927737345606	0.11103945016861	0.107370853424072	0.0101684876590129	0.0947043572323247	68.3669304927463	0.379034668791225	0.392465762495995	0.32972240447998	0.154478922718916	0.468512059295915	2.76669378382053	3.03286742109259	0.681986484796544	0.224865248000474	2.56310338978169	2.00029659962877	1.50758448190528	0.753680470278793	NA	NA	0.468512059295915	NA	0.281426312327385	0.214715957641602	0.717072262654394	0.156505508800035	0.728895562859236	42.4534936371555	50	5.55197250843048	50	14.0713156163692
dgrp358_06_1wf_11440_20s_200215	1	200215	dgrp358	0.454475963950982	0.194709766494191	0.19172477722168	0.0107219275409614	0.0559235363124939	68.3669304927463	0.414052253090028	0.428426983907981	0.429425716400146	0.00890306182796756	0.0207324840780414	2.33511498726218	2.32869663512735	0.0486328158063062	0.0208841353883121	1.20403051536553	1.19989355193323	0.0737030969690078	0.0614246962576472	NA	NA	0.0207324840780414	1.1999355619274	0.23363917307096	0.230064005590975	0.545341871186016	0.00569405546098662	0.0247498753503837	40.0594488853753	46	8.9566492587328	47	10.9810411343351
dgrp358_07_1wf_11440_20s_200215	1	200215	dgrp358	0.536557408970179	0.312078882347454	0.322061538696289	0.0367278915765892	0.114039980449899	69.6328772132819	0.363078534684933	0.581631857337374	0.582798957824707	0.0633649343836642	0.108725201946437	1.73549714044315	1.71585756387158	0.15509821536703	0.090391078276377	0.871502353685524	0.829306469373083	0.132628760362733	0.159927319104352	NA	NA	0.108725201946437	0.86362392448912	0.269518789123086	0.260726928710938	0.463383815248539	0.0396521174712472	0.152082938526111	44.3506741887877	33	10.298603117466	34	9.16363883018494
dgrp358_08_1wf_11440_20s_200215	1	200215	dgrp358	0.368053090659748	0.186203167988704	0.207030773162842	0.0551000980156333	0.266144482647968	70.6071705848634	0.368358308460471	0.505913882301404	0.383419990539551	0.196015294915684	0.51122867808705	2.17236129666327	2.6081060577796	0.781370507243406	0.299593072495151	1.71261532571221	1.74187220180689	0.264805814214187	0.152023675410571	NA	NA	0.51122867808705	1.71699932802484	0.3197107143127	0.237703800201416	0.631946909340252	0.133885970699666	0.563247077186899	44.5984326630432	39	7.26192355155945	39	12.4687178581953
dgrp358_09_1wf_11440_20s_200215	1	200215	dgrp358	0.438366756669139	0.218164373934269	0.130363464355469	0.218360646685928	NA	77.3918546876866	0.397345538205255	0.497675452381372	0.398760795593262	0.23107516246831	0.579483151357758	2.26998272156204	2.55699104081623	0.725552933435253	0.28375263028049	2.01883987479037	1.88240931595341	1.47661780787833	0.784429717471117	NA	NA	0.579483151357758	1.28119487800202	0.279511078447103	0.245400905609131	0.561633243330861	0.0982705460461216	0.400448995093134	46.6405465341049	40	8.72657495737076	40	11.1804431378841
dgrp358_10_1wf_11440_20s_200215	1	200215	dgrp358	0.377904657249051	0.169922293587164	0.138029098510742	0.0920111459819702	NA	76.6165377056416	0.413345227134734	0.449643290517005	0.383418798446655	0.141423165518667	0.368847761485912	2.38512052966441	2.60812551922436	0.630917776121179	0.24190468268138	2.081905046389	1.93747279398047	1.33670416533385	0.689921515020416	NA	NA	0.368847761485912	1.64617008766041	0.279720996929841	0.237716972827911	0.622095342750948	0.113121400440015	0.475865896718726	44.9474575254263	44	7.47658091783524	44	12.307723864913
dgrp358_11_1wf_11440_20s_200215	1	200215	dgrp358	0.568748753148997	0.534484356641769	0.536787033081055	0.157578561977933	0.293558808739217	60.3478443774092	0.376797336231923	NA	0.958532333374023	0.188056049818011	0.196191660177029	1.12625015644113	1.05166262981852	0.343990994309459	0.327092533818399	0.937475026851731	0.774634269379519	0.771508407537775	0.995964725593347	NA	NA	0.196191660177029	0.752882480312108	NA	NA	0.428200971945236	0.0480056647640002	0.113822773272642	37.6089373686628	20	10.6896871328354	21	8.45048207044601
dgrp358_12_1wf_11440_20s_200215	1	200215	dgrp358	0.529922649808709	0.277095561091964	0.260699033737183	0.0537433786328584	0.206151046524547	66.2687817905234	0.382656385239038	0.522898127098341	0.475429058074951	0.127330226498793	0.267821716691787	1.9847647767635	2.10336323162298	0.342187507246473	0.162685884255206	0.877915686184073	0.8485162544942	0.0940824167013803	0.11087874416438	NA	NA	0.267821716691787	0.887067858603474	0.245802566006377	0.214725017547607	0.470077350191291	0.0752572131785755	0.350481811752047	40.9106092963671	37	10.2525357604027	37	9.09469494223595
dgrp360_01_1wf_C11440_20s_100715	1	100715	dgrp360	0.710929623501702	0.442534053698182	0.453577995300293	0.0441590347966192	0.0973570923946245	NA	NA	0.622472378515428	0.62271785736084	0.0458589830466636	0.0736432760110976	1.61521034688778	1.60586369602139	0.118950226227433	0.0740724300089341	0.411595734683446	0.406816026777173	0.0314191146806507	0.0772317524694278	NA	NA	0.0736432760110976	0.41077713456007	0.181782870523391	0.184503555297852	0.292033633615898	0.00632511621118852	0.0342818120820362	NA	32	14.1610897183418	31	5.63526898622513
dgrp360_02_1wf_C11440_20s_100715	1	100715	dgrp360	0.769957791701548	0.673192250339881	0.591987609863281	0.239640340396045	0.404806344597972	79.2868824018198	0.235524881607259	0.874323576688766	0.80724048614502	0.239360146937353	0.296516528897626	1.20587701645266	1.26282879643134	0.256688089426415	0.203264361845245	0.311007870504694	0.3247410223776	0.0883102511918662	0.271940546794182	8.69565217391304	NA	0.296516528897626	0.289136431658194	0.194644405083223	0.199887275695801	0.222622848420008	0.0161416736652344	0.0807538829525078	60.6128488111225	23	15.4834217578173	22	4.2821769118309
dgrp360_04_1wf_C11440_20s_100715	1	100715	dgrp360	0.709525996205673	0.470238802830378	0.445897102355957	0.203422264296971	0.456208984588962	82.29	0.361121544835504	0.662750632598482	0.630389213562012	0.206491034499905	0.327561179756119	1.6461618256359	1.58632155894531	0.478086611306075	0.301380642915764	0.488369058141679	0.440643863179074	0.199856706238453	0.453556086760324	NA	NA	0.327561179756119	0.410987532369529	0.193262285199659	0.192206859588623	0.291606338332601	0.00879782812329209	0.045772706250557	52.5733080754864	30	14.1071640849113	29	5.6046062707901
dgrp360_05_1wf_C11440_20s_100715	1	100715	dgrp360	0.761002424256234	0.579669234752655	0.568916320800781	0.138131508807041	0.242797585087054	93.7459963785121	0.24940182519232	0.761717987060547	0.75340461730957	0.140949767522999	0.187083758560353	1.35373785452283	1.32730803213156	0.228011625179623	0.171785011210587	0.332615715765089	0.333373030050415	0.0823194374146082	0.246928905443129	NA	NA	0.187083758560353	0.314731050573834	0.182439907239034	0.18451601266861	0.239511092475399	0.0111896388253721	0.0606431857243124	70.3655737772385	25	14.4917308688164	26	4.74343758821487
dgrp360_06_1wf_C11440_20s_100715	1	100715	dgrp360	0.765943942629603	0.819239608943462	0.399768829345703	1.02779709266687	NA	78.9906900083801	0.331404238098019	1.06958167999983	0.630414009094238	1.09132940794853	NA	1.64367957919779	1.78185460882332	0.947973007985157	0.532014791381417	0.690346700814975	0.520908980485296	0.559659072969507	1.0743893730688	31.25	17.6470588235294	NA	0.300851197253608	NA	0.192195892333984	0.230435152169265	NA	NA	52.8128405693161	16	13.1078337430954	17	4.18997669219971
dgrp360_07_1wf_C11440_20s_100715	1	100715	dgrp360	0.791224037335334	0.739501701933997	0.576583981513977	0.838102541370383	1.45356542713816	87.8685173483654	0.247955025565241	0.934629974620683	0.768789768218994	0.842727548234224	1.09617425084431	1.52492056531041	1.30074571923172	0.696001880005427	0.535079124009356	0.473231847961793	0.396214690455627	0.272061402465466	0.686651477138844	9.52380952380952	NA	1.09617425084431	0.263864534965062	0.195128272686686	0.199880123138428	0.208775962664666	0.0112522224146791	0.0562948543256916	66.0810768828717	21	15.5295357406139	21	4.0976937264204
dgrp360_08_1wf_C11440_20s_100715	1	100715	dgrp360	0.790235562489691	0.777633032202721	0.707282066345215	0.618257507213876	0.874131462725526	99.1448563870058	0.340807702130958	0.984052185341716	0.914860725402832	0.615105601484823	0.672348899023925	1.36837142685946	1.16135970578805	0.716783481259325	0.617193344738052	0.464670976231816	0.341739852743281	0.349718129865937	1.02334605419477	30	NA	0.672348899023925	0.265046344505329	0.206108792551926	0.215258002281189	0.209449047136005	0.0297727315834579	0.138311845636132	65.3555257036465	20	15.5526606440544	21	4.32828464359045
dgrp360_09_1wf_C11440_20s_100715	1	100715	dgrp360	0.696766461996347	0.43821090948768	0.422833442687988	0.152056118604806	0.359612327819134	77.3452440037524	0.293319600617033	0.628920783919673	0.599653244018555	0.153946398922146	0.25672570015711	1.66210655356974	1.66763043471346	0.316098265922333	0.189549350588967	0.455024619330928	0.46000898144909	0.123539239140773	0.268558319778035	3.125	NA	0.25672570015711	0.41666598617734	0.182587580755353	0.184511184692383	0.290318885023004	0.0174068902983061	0.0943405697997491	54.6583679229448	32	14.0227491036057	32	5.8428025841713
dgrp360_10_1wf_C11440_20s_100715	1	100715	dgrp360	0.793478299036273	0.841826611095005	0.776504039764404	0.499157550824431	0.642826727567159	87.9892769489555	0.366881983731668	1.06093211637603	0.984077930450439	0.498229165539349	0.506290355796614	1.11655187696117	1.03231700713758	0.507628698968789	0.49173722360377	0.362172337605456	0.28849766630207	0.295781105786576	1.02524609497839	22.2222222222222	NA	0.506290355796614	0.260273911982924	0.219105505281025	0.215267181396484	0.206521700963727	0.0113199777164232	0.0525857106642455	55.7075964748076	18	15.1528789997101	18	3.94389909505844
dgrp360_11_1wf_C11440_20s_100715	1	100715	dgrp360	0.683190930482981	0.406178466478984	0.284456729888916	0.339739306987379	1.19434441617905	75.3934622762478	0.210735717269686	0.594531408945719	0.468953609466553	0.340341110800376	0.725745796449937	NA	2.24264589508985	0.884564521155289	0.394428974762353	0.810338139519793	0.705814538901009	0.541121514327286	0.76666246514253	6.66666666666667	NA	0.725745796449937	0.463719665149904	0.188352942466736	0.184510946273804	0.316809069517019	0.0127894552540607	0.0693154282298348	59.5053669260177	30	12.1853539943695	30	5.65058827400208
dgrp361_01_1wf_9100_20s_021214	1	21214	dgrp361	0.557432206834297	0.287900313735008	0.29106330871582	0.0333997958642122	0.114750966075295	80.6619343696269	0.440920080424278	0.516475923359394	0.51580810546875	0.0311599366888262	0.0604099399727521	1.94311563274041	1.97045194024241	0.118206675726934	0.0599896263962632	0.803721727623749	0.818114243039997	0.0802337060743209	0.0980715184424412	NA	NA	0.0604099399727521	0.793940119963792	0.228575609624386	0.232876777648926	0.442567793165703	0.00848742286444819	0.0364459820774549	NA	38	10.9402119219303	38	8.68587316572666
dgrp361_02_1wf_9100_20s_021214	1	21214	dgrp361	0.573417472351633	0.239464731320091	0.241274833679199	0.0241633631292157	0.100148709091407	67.3078375784451	0.418484971707735	0.417609757055407	0.424238204956055	0.0258707457812452	0.0609816501178272	2.40517037131236	2.4037999523172	0.179643954856036	0.074733321582299	0.757565068134747	0.724734239728912	0.150009472512048	0.206985491078991	NA	NA	0.0609816501178272	0.744363399530491	0.178248781473079	0.174723625183105	0.426830979069843	0.00685789105789715	0.0392499357239771	39.1405190737207	46	11.0153776407242	47	8.3776927292347
dgrp361_03_1wf_9100_20s_021214	1	21214	dgrp361	0.602932208637351	0.234087888808811	0.241284370422363	0.0270258128537003	0.112008137147019	70.7451963916986	0.447842369625767	0.388249102395539	0.391016006469727	0.0243547815163754	0.0622858939618907	2.58705425857138	2.5574400624375	0.186845619798054	0.073059628079796	0.670195608074428	0.633421299624332	0.15562576335736	0.245690764503274	NA	NA	0.0622858939618907	0.658198844225734	0.154076377861202	0.149759262800217	0.396849282871573	0.0137904499836998	0.0920841203798973	39.0625	51	11.9384823292494	52	8.01197164878249
dgrp361_04_1wf_9100_20s_021214	1	21214	dgrp361	0.563007942777074	0.202094077522104	0.199752807617188	0.00976473061730868	0.0488840719376627	81.3100739453606	0.418401327160942	0.358954221010208	0.357747077941895	0.00839697123581991	0.0234718094250479	2.78737198514099	2.79527090969677	0.0653618178694509	0.0233829993517664	0.776449582441232	0.782630499883815	0.0434583615298731	0.0555285815417681	NA	NA	0.0234718094250479	0.776173876104543	0.156860143488104	0.158069729804993	0.436992057222926	0.00419104859765604	0.0265139227025089	NA	55	11.1151742637157	55	8.6273078918457
dgrp361_05_1wf_9100_20s_021214	1	21214	dgrp361	0.518307657181462	0.187657511344662	0.191344261169434	0.0132003007273122	0.0689871786414513	61.1175225487748	0.330886841931312	0.36205814971968	0.357827186584473	0.0138344988024172	0.0386625145352147	2.76564167482468	2.79517404261898	0.104787351341514	0.0374886678767708	0.935135163981465	0.912597153729034	0.104517414625968	0.114527438748731	NA	NA	0.0386625145352147	0.928577616136496	0.174254564534534	0.174667358398438	0.481288888730855	0.010093492932483	0.0577869444241467	40.894538525945	54	10.1335056126118	55	9.58400104939938
dgrp361_06_1wf_9100_20s_021214	1	21214	dgrp361	0.434641035593623	0.137410055245123	0.14134693145752	0.0136683128570866	0.0967004569263996	56.466596873727	0.272083676114578	0.316146069957364	0.316098928451538	0.0334443335226126	0.105803375185247	3.18594529288898	3.16390065438362	0.224210206666049	0.070865122251991	1.31646781523815	1.23697795412677	0.303547295107573	0.245394264380289	NA	NA	0.105803375185247	1.30074916565166	0.178736014712241	0.174712419509888	0.565358964406377	0.0323612115180182	0.185225593056289	41.1029576186435	62	8.5194234251976	62	11.081632912159
dgrp361_07_1wf_9100_20s_021214	1	21214	dgrp361	0.49031427792098	0.215564805931515	0.216318607330322	0.0132486956039303	0.0612462134785259	59.4571799701264	0.393292555961332	0.439646193550693	0.440953254699707	0.0132008444331317	0.0299370608844278	2.27660534305411	2.2678140808395	0.0691947362358651	0.0305116441512925	1.04269359487371	1.03849104521044	0.0663965605733073	0.0639356120397287	NA	NA	0.0299370608844278	1.03950821958557	0.224081387619178	0.224617004394531	0.50968572207902	0.0037102549477148	0.0165181392108581	NA	45	9.70041626691818	45	10.083662442863
dgrp361_08_1wf_9100_20s_021214	1	21214	dgrp361	0.326454374959819	0.0825591809474505	0.0831939876079559	0.0056481372687535	0.0678911713592793	52.6839150534454	0.272194363690932	0.252896537096837	0.249588966369629	0.0269598884043513	0.108017148339903	3.97862059081272	4.00659310952232	0.236354607154545	0.0589914175694081	2.07335189351013	NA	0.365869213460876	0.182898957999803	NA	NA	0.108017148339903	2.06261017899322	0.170287406991554	0.16639518737793	0.673348116768991	0.0271443134193622	0.163131601623249	38.3436503187257	78	6.43961611390114	79	13.4527051523328
dgrp361_09_1wf_9100_20s_021214	1	21214	dgrp361	0.584417714480252	0.308746036556032	0.31614875793457	NA	NA	62.7141736920937	0.374726063695963	0.528296848138173	0.532538414001465	NA	NA	2.00580442157067	1.87810487250947	NA	NA	0.844764817129754	0.714350283966225	0.389603342020498	NA	NA	NA	NA	0.710092419258088	0.219238220034419	0.216320991516113	0.414990588732565	0.00896086795312128	0.0414239408312522	39.2135382465105	36	11.1148573160172	37	8.1118141412735
dgrp361_10_1wf_9100_20s_021214	1	21214	dgrp361	0.384470357725802	0.102529793575003	0.0998530387878418	0.00527879840092969	0.0528656760476321	81.78907705189	0.497451749057319	0.266678019552617	0.266231536865234	0.00454092683134884	0.0170563070206346	3.75091752155228	3.75613574124124	0.0638028822941496	0.016986308986018	1.6048052448516	1.66510780037604	0.109963882961132	0.0660400983866018	NA	NA	0.0170563070206346	1.60098075158549	0.164148225977614	0.166383028030396	0.615529642274198	0.00431217513059557	0.0259171574267047	41.1029576186435	74	7.58720472455025	74	12.1469687223434
dgrp361_12_1wf_9100_20s_021214	1	21214	dgrp361	0.410853307351161	0.195001180579023	0.18303394317627	NA	NA	64.1386742242931	0.359154860686607	0.474624828594487	0.449258804321289	NA	NA	2.26277589265324	2.22588848650553	NA	NA	1.8776598532378	1.15785028234953	NA	NA	NA	NA	NA	1.4339587441736	0.279623648015464	0.199673652648926	0.589146692648839	NA	NA	41.1029576186435	41	7.99504840373993	41	11.464569568634
dgrp362_01_1wf_11440_20s_250215	1	250215	dgrp362	0.706428461791467	0.582459931788237	0.56745719909668	0.149095190220562	0.262742618223723	96.4676216406313	0.327232792250197	0.824513681556868	0.797504425048828	0.148372163259314	0.186045567396356	1.24706734056601	1.25391153778084	0.206548595604491	0.164723418982202	0.440049767475245	0.405400136465542	0.112116619982128	0.276557923634685	4.34782608695652	NA	0.186045567396356	0.415571503820855	0.24205374976863	0.245387077331543	0.293571538208533	0.0153325772233019	0.0624832301278277	64.900252449432	23	13.3965784311295	23	5.5672362446785
dgrp362_02_1wf_11440_20s_250215	1	250215	dgrp362	0.660491214222548	0.405680266118819	0.383416175842285	0.101861491241859	0.265668215531311	82.4869681161818	0.392012803918615	0.614209935549767	0.590468406677246	0.10092712596552	0.170927224596942	1.66893154041561	1.69357071215261	0.261524024751011	0.15442167420255	0.543014065640459	0.54000587004808	0.124465057808045	0.230488342278507	NA	NA	0.170927224596942	0.514499895428968	0.208722454495728	0.207064628601074	0.339822660649253	0.00677271100192137	0.0327081986318847	50.151020458212	31	12.5760882496834	32	6.6791185438633
dgrp362_03_1wf_11440_20s_250215	1	250215	dgrp362	0.673330330689282	0.379807973609251	0.383417129516602	0.0525043459484115	0.136937924538236	93.2402768818283	0.40718377770148	0.564073763349477	0.567458152770996	0.0533711079172423	0.0940529405677263	1.78959481592053	1.78638222912759	0.179669303039226	0.10057718897426	0.49537429402482	0.489744793715656	0.0777165797265807	0.158687914039782	NA	NA	0.0940529405677263	0.485138157690076	0.184259340592793	0.184038162231445	0.326658236147448	0.00467311747193747	0.0253921111538844	55.2743487071535	34	12.9134711027145	35	6.44907692074776
dgrp362_04_1wf_11440_20s_250215	1	250215	dgrp362	0.768279650420199	0.750693012225001	0.521438598632813	NA	NA	101.920863050702	0.397529995705	0.977109066749874	0.743834495544434	NA	NA	1.21890924139603	1.34438508295864	0.337768225867704	0.251243657899242	0.387224260310244	0.426458753987066	0.115088283909624	0.269869671647343	10.5263157894737	NA	NA	0.302872249297275	0.227364081144333	0.222378969192505	0.23269058581209	0.0127181381573643	0.0571912811879018	61.4042627999067	19	14.263167232275	20	4.54728162288666
dgrp362_05_1wf_11440_20s_250215	1	250215	dgrp362	0.52688703219001	0.195614058454082	0.191720962524414	0.0220682888068968	0.115106290498028	102.438489939085	0.325208293876418	0.371263755801714	0.368083000183105	0.0343598147148205	0.0933480076442759	2.70946047168626	2.71677855131191	0.177781457523749	0.0654383322622668	0.908412968303724	0.851976396559905	0.17153424567167	0.201336852011731	NA	NA	0.0933480076442759	0.897281519805022	0.175520879664907	0.168704986572266	0.47276599700901	0.0266064268304366	NA	69.1246433987185	53	10.3675450980663	54	9.47812750190496
dgrp362_06_1wf_11440_20s_250215	1	250215	dgrp362	0.531572734568009	0.215193664655089	0.214714050292969	0.00805898425292184	0.0375335672813478	90.5278527139576	0.363084180514536	0.404824496557315	0.406414031982422	0.0079817211209072	0.0196393837141244	2.47110627453361	2.46057383415738	0.0477896290183382	0.0194221479375781	0.882514688025319	0.892780689287618	0.0394834333621681	0.044225232283724	NA	NA	0.0196393837141244	0.880679536568927	0.189516656861013	0.191707015037537	0.468145229532031	0.00409929651176801	0.0213831325419435	57.6586214975696	48	10.3292959034443	49	9.28631618618965
dgrp362_07_1wf_11440_20s_250215	1	250215	dgrp362	0.53571106706177	0.246481034727324	0.245386123657227	0.0117166523436963	0.0477478195142892	98.4716903480386	0.439414414788333	0.460100695845627	0.460097312927246	0.011471074915759	0.0249318450542069	2.17475857050698	2.17345775485754	0.0530484827591904	0.0244074137813953	0.86940175453526	0.874961136674543	0.0457317524955333	0.0522671814537336	NA	NA	0.0249318450542069	0.866782578713419	0.213645466884901	0.214712142944336	0.464345020153119	0.00437318103636884	0.0203676465448095	55.2018101605373	42	10.3522034585476	43	9.18675507605076
dgrp362_08_1wf_11440_20s_250215	1	250215	dgrp362	0.768750504422792	0.754566637674967	0.314399719238281	NA	NA	100.256089914778	0.335126323141763	0.981549453735352	0.544434547424316	NA	NA	1.6922945355169	1.83676808301555	0.498870630748432	0.271602406074806	0.63950840327499	0.699893985133047	0.235821925315107	0.336939494158217	6.66666666666667	NA	NA	0.30081215458953	0.226982816060384	0.21472692489624	0.231249495577208	0.0244064243156919	0.113662617426694	66.6576351290683	15	11.3184995651245	15	3.40474224090576
dgrp362_09_1wf_11440_20s_250215	1	250215	dgrp362	0.612178699498767	0.334777322837285	0.36040210723877	0.071240835938467	0.197670420087942	117.489301853403	0.362789096256933	0.546862089633942	0.575118064880371	0.0740625504875355	0.128777993615869	1.85806070770454	1.73877341204368	0.26497165483244	0.152389985375383	0.659282939050837	0.607844284801576	0.143136487551758	0.235482163986264	NA	NA	0.128777993615869	0.633729383180777	0.212158226304584	0.214696884155273	0.387955629629764	0.00675627787675205	0.0314689144341087	74.8654642141488	35	11.717206299305	36	7.63769614696503
dgrp362_10_1wf_11440_20s_250215	1	250215	dgrp362	0.4643882193135	0.169415526919895	0.168709754943848	0.0149422601124632	0.0885678490697615	91.1607912427267	0.401826953758564	0.364814437304934	0.368069887161255	0.016466744274803	0.0447380914581277	2.74676450066391	2.77448033529486	0.130964887437707	0.0472033936487743	1.16470205539514	1.13640410755624	0.117124413573948	0.103065813292259	NA	NA	0.0447380914581277	1.15379746621597	0.195471205697818	0.19172191619873	0.535809950784463	0.0057476185283684	0.0299789332504411	54.5299281954415	54	9.14843845367432	55	10.75091631338
dgrp362_11_1wf_11440_20s_250215	1	250215	dgrp362	0.537658810447146	0.213486576080322	0.214704036712646	0.00751049196410728	0.0349806742299825	113.520745319963	0.363936457734652	0.397067009657621	0.398735046386719	0.0075877394392326	0.0190295272712836	2.51933737264156	2.50794978604147	0.0480894378071198	0.0191748008970403	0.860362181493568	0.85719996801791	0.0324225972606982	0.0378238432925615	NA	NA	0.0190295272712836	0.859915583208514	0.183580433577299	0.184039115905762	0.462341189552854	0.00286508558125807	0.0155678077845427	72.2064073888183	50	10.6743288040161	50	9.17902167886496
dgrp362_12_1wf_11440_20s_250215	1	250215	dgrp362	0.524876254812029	0.238968764626703	0.237724304199219	0.0130763050097478	0.0550061763932624	77.8075195659134	0.402057491146208	0.455285912509574	0.452449798583984	0.01248150579674	0.0275864987359988	2.19803071295835	2.21018995506167	0.0615306979268435	0.0278395518837323	0.907173150991611	0.90322454465217	0.0515323554052052	0.0570537589022785	NA	NA	0.0275864987359988	0.905058146352007	0.216280627149073	0.214715957641602	0.475043530244359	0.0034659650763546	0.0161420935566415	46.5244234569328	43	10.2756568789482	44	9.51634759455919
dgrp365_01_1wf_11440_20s_250215	1	250215	dgrp365	0.503512345312165	0.241272134751808	0.245380401611328	NA	NA	54.6180336976717	0.360889637800703	0.479178190958209	0.475456237792969	NA	0.189764517149486	2.16187343616715	2.10324299170397	NA	NA	1.13448273250192	0.999991709019757	0.572527801235295	NA	NA	NA	0.189764517149486	0.986048622859535	0.237906056206401	0.230051040649414	0.496487654687835	0.0457001172840625	0.198652078056483	34.9069512991324	41	9.89215752482414	41	9.75414830446243
dgrp365_02_1wf_11440_20s_250215	1	250215	dgrp365	0.423565078193371	0.154221946442569	0.153373956680298	0.00933055083211143	0.0608353010776178	78.0235091302615	NA	0.364104489209475	0.368062019348145	0.0112306594998821	0.0305129540933677	2.74872614118239	2.71696157663038	0.0847115191992693	0.0311787696697315	1.36652052081676	NA	0.102721246285495	0.0760929664374308	NA	NA	0.0305129540933677	1.36091229301833	0.209882542766907	0.20704984664917	0.576434921806629	0.00675845922422447	0.0326417011825957	54.6363711276655	54	8.32798510789871	54	11.333657309413
dgrp365_04_1wf_11440_20s_250215	1	250215	dgrp365	0.522626631324589	0.235451379282908	0.230051040649414	0.0294500410992565	0.128015248338462	72.795	0.370060164303484	0.45051546394825	0.452432632446289	0.0233795258425586	0.0516751537486282	2.22549034898844	2.24831763627495	0.114799604214901	0.0510602249267158	0.933874638365154	0.931140475488488	0.1362376585278	0.146312680110193	NA	NA	0.0516751537486282	0.913411870086903	0.215064084665342	0.214713096618652	0.477373368675411	0.0134810630466048	0.0627864031533588	45.8564703395279	44	10.359860688448	44	9.46281972527504
dgrp365_05_1wf_11440_20s_250215	1	250215	dgrp365	0.428464303632801	0.143620157140796	0.145695686340332	0.0108427361724189	0.0744204337463449	70.9214284754615	0.382534662509973	0.335197485351967	0.329738140106201	0.0465284521821316	0.141107280362368	3.01246969598965	3.03270953028947	0.215262568901516	0.0709802791040689	1.34376854046149	1.31566063176635	0.342669294192784	0.260454167221474	NA	NA	0.141107280362368	1.33391671493131	0.19157732821117	0.184042930603027	0.571535696367199	0.0470169265005827	0.255467169244312	43.7915237688756	59	8.47358927130699	59	11.303062364459
dgrp365_06_1wf_11440_20s_250215	1	250215	dgrp365	0.467243360283523	0.165078028765592	0.168704986572266	0.0198359655331785	0.117577825861607	70.4935811120417	0.361883718806311	0.353302032297308	0.352748870849609	0.0169911467144854	0.0481678273655748	2.83741318669092	2.83487796173936	0.14579301133084	0.051428320124718	1.16652226249664	1.09078884146858	0.253856802693464	0.232727722399217	NA	NA	0.0481678273655748	1.13975746605769	0.18814891576767	0.184043884277344	0.532544108349029	0.0160063862147323	0.0869704868356917	44.9831018272417	55	9.07929158210754	56	10.5363392829895
dgrp365_07_1wf_11440_20s_250215	1	250215	dgrp365	0.523850854549848	0.238968899776769	0.23005199432373	0.0405771724463747	0.176382615441596	64.2456020985094	NA	0.456177359836739	0.452413558959961	0.038804015014603	0.0857711141633515	2.20710878210874	2.21036699761799	0.17750654790553	0.0803063690766374	0.933234481041297	0.93334853352679	0.149362673523205	0.160028829700752	NA	NA	0.0857711141633515	0.908703234942224	0.217151812277734	0.214716911315918	0.476024966156695	0.00432319908393838	0.0201344135282272	36.8501698910602	43	10.2756626904011	44	9.55467974022031
dgrp365_08_1wf_11440_20s_250215	1	250215	dgrp365	0.470633083767971	0.22182000410266	0.222395896911621	0.0183556843428504	0.0825360746207691	51.0537162702188	NA	0.471322590258063	0.475433349609375	0.0190831515695032	0.0401384370389294	2.12522072256975	2.10334424545863	0.0922545395079847	0.0438608847349516	1.13425636940401	1.10350968419811	0.122636178658067	0.11113285222067	NA	NA	0.0401384370389294	1.1251794819744	0.24958731730779	0.253041982650757	0.529546689394059	0.00514706514765419	0.0203407556870041	43.0486541601477	41	9.09462016820908	42	10.4826673269272
dgrp365_09_1wf_11440_20s_250215	1	250215	dgrp365	0.495669486324636	0.22986789047718	0.23005199432373	0.0197664457686618	0.0859216449166979	87.1105520703433	0.386841235138745	0.463752352765628	0.467761993408203	0.0202885054204575	0.0433735654165308	2.16089150695318	2.1378438535232	0.11020788535648	0.0515509517567693	1.02687264524189	1.00007461975019	0.128089813505195	0.128080256188474	NA	NA	0.0433735654165308	1.01708537066977	0.23379526859106	0.230071067810059	0.504138183228185	0.00534382817377229	0.0232268586599686	53.4125985138338	42	9.65445140004158	43	10.0531965494156
dgrp365_11_1wf_11440_20s_250215	1	250215	dgrp365	0.490902613879301	0.20247727125249	0.207028388977051	0.00921496585928607	0.0445106388781664	64.5784105719551	0.372669602097742	0.412459142664646	0.414090156555176	0.00821816424269381	0.0198463163458433	2.42542253768081	2.4149330385417	0.0492815093750298	0.0204069879323814	1.03892991629268	1.03718819817122	0.050579748695301	0.0487662208116941	NA	NA	0.0198463163458433	1.03676149551395	0.209920638551315	0.207058906555176	0.50894892811721	0.00468622748417881	0.0226323395701409	40.512	47	9.51643174886703	48	10.0761906504631
dgrp365_12_1wf_11440_20s_250215	1	250215	dgrp365	0.570294583436926	0.315496539218085	NA	0.0609719984901734	0.184911965318637	84.189	0.405824718793072	0.553216790727207	0.559792041778564	0.07998774178665	0.142888315333162	1.84945399563489	1.78637766414616	0.319982685434307	NA	0.808452167846736	NA	0.361459135724271	NA	NA	NA	0.142888315333162	0.751452659717416	0.23708071352707	0.230052947998047	0.428549381546114	0.0424483565015389	0.184515594653015	50.02302274953	35	11.042378872633	36	8.53490568697453
dgrp367_01_1wf_9100_20s_101214	1	101214	dgrp367	0.826850097869679	1.17050281854776	0.16628885269165	2.15087501027247	NA	62.578076232815	0.346503743998117	1.41561671403738	0.399236440658569	2.15250436077798	NA	2.0546809630225	NA	NA	0.46233545263079	NA	NA	NA	0.726994340745291	23.0769230769231	NA	NA	0.209409060452952	0.245113895489619	0.241268157958984	0.173149902130321	0.0126461276457157	0.0524152368580089	40.894538525945	13	15.2165366411209	13	3.18648064136505
dgrp367_02_1wf_9100_20s_101214	1	101214	dgrp367	0.90894245383405	1.94561113630022	0.83202075958252	3.01544690413821	NA	NA	0.341766212475524	2.14052179881505	1.03177738189697	3.01234362335032	NA	0.893523832730089	0.969201319534115	0.358550838334189	0.369944645253415	0.219027213695951	0.237100469976235	0.0941563657237352	0.397115896620418	28.5714285714286	NA	NA	0.0999514480862761	0.194466650485992	0.19144868850708	0.0908501144878065	0.005004183604469	0.0261385107596803	NA	7	13.6192779541016	8	1.55573320388794
dgrp367_03_1wf_9100_20s_101214	1	101214	dgrp367	0.72893925930783	0.487026434678298	0.424310207366943	0.140498064605423	0.331121104715542	56.3367386791248	0.27410532656378	0.668130339338229	0.607219219207764	0.139701325793667	0.230067365087578	1.53784105911884	1.64685169435957	0.248680530817547	0.151003597755203	0.392434905047966	0.431338871014325	0.0829720833628789	0.192359392900909	NA	NA	0.230067365087578	0.373371861051156	0.181841966296945	0.183032751083374	0.272165407841016	0.0044589351108617	0.0243614057291342	40.894538525945	13	6.33134365081787	14	2.54578752815723
dgrp367_04_1wf_9100_20s_101214	1	101214	dgrp367	0.831436300782572	0.887922452254729	0.856806039810181	0.220736502175935	0.257627154711512	NA	NA	1.06793803857131	1.03996539115906	0.223178041640498	0.214601412256385	0.974009739210623	0.96157046042223	0.186244158614905	0.193687479265039	0.214340735616047	0.213608518228402	0.0446360719433502	0.208962040996993	27.2727272727273	NA	0.214601412256385	0.203020970106743	0.180266877636313	0.183028697967529	0.16879900436684	0.00478942438014484	0.0261676143322318	NA	11	9.76714697480202	12	2.16320253163576
dgrp367_05_1wf_9100_20s_101214	1	101214	dgrp367	0.919725629903119	NA	NA	1.36879843768974	0.731227721497958	65.0135691981373	0.359457476636004	2.72408297019345	NA	1.36795863889952	0.65251734374666	0.421682112514666	0.47700078437429	0.141000045895625	0.295597094416906	0.103005444541456	0.115555916425666	0.0373675722324888	0.32337221137895	100	NA	0.65251734374666	0.0875776668367328	0.219417868182063	0.216327667236328	0.0805474247968596	0.00505929036582285	0.0233871627723688	41.6439556670746	7	17.5378624796867	8	1.7553429454565
dgrp367_06_1wf_9100_20s_101214	1	101214	dgrp367	0.684689175361155	0.438320285395572	0.432624816894531	0.057114471729409	0.132018482294632	65.9219472179031	0.381920335304491	0.64017411282188	0.632368087768555	0.0576375186496926	0.0911455207252453	1.573765289711	1.58135747097662	0.132045983427425	0.0835016660375189	0.464700729133621	0.461531000489377	0.0650762748354935	0.14100087484154	NA	NA	0.0911455207252453	0.460267496145634	0.20174458026886	0.199668884277344	0.315140172381498	0.00968066453604158	0.0484835910766896	40.7450150325166	19	8.32808542251587	20	4.0348916053772
dgrp367_07_1wf_9100_20s_101214	1	101214	dgrp367	0.788303829065135	0.740443283319473	0.77360725402832	0.17128943810527	0.221416535604253	54.7770040132273	0.269952261511217	0.939286676049232	0.973373413085938	0.175222488016399	0.180015691471254	1.16842796115511	1.03619655970125	0.612981358558321	0.591568610047357	0.357944513115688	0.258104799639047	0.463834126132395	NA	NA	NA	0.180015691471254	0.268064568333299	0.198486609118325	0.19136381149292	0.211316325653832	0.0210186096790827	0.109835864550913	39.9898279010476	20	14.8088656663895	21	4.16821879148483
dgrp367_09_1wf_9100_20s_101214	1	101214	dgrp367	0.879626373996552	1.65976085662842	1.25628924369812	1.40141757280319	1.11552142934684	73.7029775941922	0.300401399195802	1.88689301013947	1.44764375686646	1.40339323691766	0.969432728363656	0.795651112006363	0.765588471080595	0.475028235003589	0.620474645253092	0.28119829706848	0.201612299363899	0.334909862273255	NA	70	NA	0.969432728363656	0.135343023865445	0.224637053229592	0.199686050415039	0.119051293328491	NA	NA	NA	10	16.5976085662842	11	2.47100758552551
dgrp367_10_1wf_9100_20s_101214	1	101214	dgrp367	0.776824564861684	0.714302659034729	0.698840141296387	0.259732041498166	0.371661594905452	55.4799084375181	0.289207711469967	0.919516054647309	0.898529529571533	0.260682831147184	0.290121607101206	1.1702791186339	1.11292947765095	0.320472327343625	0.287953849528762	0.323283741662452	0.297641629161811	0.115162611646281	0.386917018195978	14.2857142857143	NA	0.290121607101206	0.286939963979275	0.204961979253726	0.207974433898926	0.222902012659628	0.00664265345964696	0.0319397597825666	39.4346910857402	21	15.0003558397293	22	4.50916354358196
dgrp367_11_1wf_9100_20s_101214	1	101214	dgrp367	0.852961292621186	1.21401765713325	1.03163146972656	0.775439938604197	0.751663710694799	NA	NA	1.42329747860248	1.23962211608887	0.777994047629889	0.627605814330369	0.825559669550887	0.806697449989922	0.283837641424822	0.351851417688712	0.213646503719912	0.209664604116565	0.0854641036379175	0.407622946171701	53.8461538461538	NA	0.627605814330369	0.172311751326949	0.209189508642469	0.207990646362305	0.146975254145654	0.00993658509450189	0.0477741921008942	NA	13	15.7822295427322	14	2.92865312099457
dgrp367_12_1wf_9100_20s_101214	1	101214	dgrp367	0.792634154901998	0.905375585836523	0.881881237030029	0.12200471783336	0.138345973029479	64.0625	0.388295794927588	1.14223640280611	1.11481857299805	0.115387133831612	0.103503060162789	0.883278566081502	0.897006942852352	0.0815396333070281	0.0909018976461251	0.260702815300543	0.26168218291763	0.0372688062675513	0.142420113788498	11.7647058823529	NA	0.103503060162789	0.261616085826683	0.236860816969591	0.232949733734131	0.207365845098001	0.0209672506125136	0.0900076178513422	39.1873006374514	17	15.3913849592209	17	4.02663388848305
dgrp370_01_1wf_9100_20s_021214	1	21214	dgrp370	0.54111450229779	0.252962302593958	0.257907867431641	0.0154524782176912	0.0599147221508739	73.8748355429663	0.412593156095011	0.467483871749469	0.474152565002441	0.0156910959481184	0.0330929264255643	2.14113891009883	2.10903005728262	0.0741015886744958	0.0351353876719861	0.851210205965409	0.838714746872654	0.057680014853447	0.0687719097208206	NA	NA	0.0330929264255643	0.84803769951387	0.214521569155511	0.216309547424316	0.45888549770221	0.00385849999124869	0.0178378626241577	43.394583990294	42	10.6244167089462	42	9.00990590453148
dgrp370_02_1wf_9100_20s_021214	1	21214	dgrp370	0.696308611328934	0.657230988144875	0.648942947387695	NA	0.635097043682463	68.9096158474998	0.381103062680759	0.943878874182701	0.948441505432129	NA	0.481988490716277	1.45900145009195	1.16695156695157	NA	NA	NA	0.320524464117237	NA	NA	15	4.76190476190476	0.481988490716277	0.431175999845178	NA	0.207991600036621	0.300231561690561	NA	NA	42.6479501998631	20	13.1446197628975	21	5.95102679729462
dgrp370_03_1wf_9100_20s_021214	1	21214	dgrp370	0.594551228467551	0.328309302670615	0.324549674987793	0.0601628339467186	0.185373268203031	NA	NA	0.552196828382356	0.551054000854492	0.05966245219832	0.108269701527989	1.83148137887045	1.81470418225682	0.192337985501352	0.105988616426813	0.705883901967332	0.68438923582828	0.132672341085173	0.193855096105663	NA	NA	0.108269701527989	0.682710699303385	0.224140273614062	0.224632263183594	0.405906484958768	0.00828710917472094	0.0368918919182496	NA	35	11.4908255934715	36	8.06904985010624
dgrp370_04_1wf_9100_20s_021214	1	21214	dgrp370	0.704661809550871	0.554985364278158	0.590693473815918	0.202654979134677	0.343079766609767	76.9600647251547	0.369306640460264	0.787591092288494	0.831955194473267	0.202877332130627	0.243856079604232	1.39685078096975	1.25206281353407	0.560436460148798	0.44761049852356	0.579486687059476	0.426461793914925	0.586799533251564	1.37597210728946	NA	NA	0.243856079604232	0.419144475731642	0.232619049549103	0.232950210571289	0.29535510473231	0.00599913091815571	0.0257528460843345	48.5382017719033	24	13.3196487426758	25	5.81547623872757
dgrp370_05_1wf_9100_20s_021214	1	21214	dgrp370	0.697336319767479	0.524463632106781	0.515898704528809	0.0849375003957513	0.164639879205218	78.621840316163	0.421491102296998	0.752095677852631	0.748843193054199	0.0833904073826039	0.111358970951571	1.34508165207597	1.33539305595	0.142952138330851	0.1070487357216	0.445334435633877	0.450000525390198	0.0746987028733605	0.165996923689342	NA	NA	0.111358970951571	0.434416464602686	0.227835636872512	0.224716186523438	0.302934378672437	0.0051054667919037	0.0227196218968018	45.4834341766849	25	13.1115908026695	26	5.9237265586853
dgrp370_06_1wf_9100_20s_021214	1	21214	dgrp370	0.633502450427654	0.37692102970499	0.39101505279541	0.0558523588143861	0.142839408393849	79.7525540093436	0.361970899976197	0.594979592344978	0.607261180877686	0.0539853993078926	0.0888998029313623	1.70486913221871	1.64673789711814	0.281456328536086	0.170917502432321	0.643614550455224	0.553207160626311	0.465379351763182	0.841238843033603	NA	NA	0.0888998029313623	0.578525859410548	0.218058562639988	0.216302871704102	0.366497549572346	0.0134960977803391	0.0623944456863315	50.8844502591813	33	12.4383939802647	33	7.1959325671196
dgrp370_07_1wf_9100_20s_021214	1	21214	dgrp370	0.693376447126156	0.446045753936614	0.399349212646484	0.228598928503061	0.572428644564335	77.5465477538874	0.413420422272229	0.64329521976892	0.582381248474121	0.23281203817104	0.399758815691651	1.74140957714613	1.71708825210301	0.599386394127966	0.349071396530646	0.567096519535284	0.480026960851743	0.340143832449655	0.708593183695591	3.2258064516129	NA	0.399758815691651	0.44221801035312	0.197249465832306	0.19965934753418	0.306623552873844	0.0110823769469904	0.0555064267406422	45.4872212357217	31	13.827418372035	31	6.1147334408015
dgrp370_08_1wf_9100_20s_021214	1	21214	dgrp370	0.505312657975008	0.176943868398666	0.174723625183105	0.0109378436173737	0.0626008280558005	NA	NA	0.350167100716914	0.349429368972778	0.0116056398010019	0.0332131206804944	NA	NA	0.0919522420443646	0.0321307919900716	0.982233676085832	0.999661708698452	0.0597968000048774	0.0598170355877011	NA	NA	0.0332131206804944	0.978295225689051	NA	NA	0.494344960777195	0.0036503683216313	0.0208944092166845	NA	56	9.90885663032532	57	9.86689047515392
dgrp370_09_1wf_9100_20s_021214	1	21214	dgrp370	0.491773299459324	0.210350460656311	0.207916259765625	0.0491565756173674	0.236424874479656	62.578076232815	0.450686213617185	0.427738677328719	0.424302101135254	0.0507536699243668	0.119616824400754	2.37397433571612	2.3568907929458	0.314036507279377	0.133241857543545	1.11094537210612	1.08293309398543	0.370894832199836	0.342490994374235	NA	NA	0.119616824400754	1.03334171977331	0.2173639067697	0.216315269470215	0.50816986700189	0.00484101152338884	0.0223794258040365	34.375	46	9.67612119019032	47	10.2161036181759
dgrp370_10_1wf_9100_20s_021214	1	21214	dgrp370	0.579064939049017	0.30220599996077	0.316207885742188	0.0652375756519502	0.20631229831232	69.3862603474204	0.364265609699977	0.521886198907285	0.549014091491699	0.075891836126165	0.138232947573282	1.96493670928328	1.82144687267124	0.393939233946535	0.216278190628093	0.805281348270962	0.690479374662249	0.39775442201269	0.576055471906389	NA	NA	0.138232947573282	0.730976005010979	0.220905334541672	0.208070755004883	0.423282575787977	NA	NA	44.111231917166	37	11.1816219985485	38	8.39440271258354
dgrp370_11_1wf_9100_20s_021214	1	21214	dgrp370	0.619311983950861	0.410239371760138	0.416000366210938	0.0305074106300721	0.0733350571489714	78.2654986648012	0.339975965750363	0.662411486280375	0.673779487609863	0.0326536272703257	0.0484633739536355	1.51310263535728	1.48416509909994	0.0805420003840845	0.0542675477498619	0.618536004094106	0.619963183123841	0.0589210462472518	0.0950395892065127	NA	NA	0.0484633739536355	0.615161262507472	0.252363369862239	NA	0.380976741933219	0.0130695894954552	0.0506772938799763	51.6571101713017	29	11.896941781044	30	7.57090109586716
dgrp370_12_1wf_9100_20s_021214	1	21214	dgrp370	0.680093715921086	0.511494590044022	0.507501840591431	0.187465770399345	0.369389340895545	86.2918829467755	0.296845515190156	0.752094274759293	0.748867034912109	0.186034989353302	0.24842192362645	1.42366938197905	1.33535054072365	0.431214070040225	0.322922002043406	0.568463930463424	0.476182244946233	0.346567577307043	0.727804492891529	4	NA	0.24842192362645	0.47106963753404	0.24094957113266	0.241268634796143	0.320371500248125	0.00672052528499597	0.0278549480361358	60.6765244967112	25	12.7873647511005	26	6.26468884944916
dgrp371_01_1wf_9100_20s_021214	1	21214	dgrp371	0.726910943459366	0.507782080343791	0.507403373718262	0.036307077194839	0.0715546625730531	56.2716972042785	0.333012156522937	0.698547855019569	0.690528869628906	0.0467734308541925	0.0677356630713048	1.43744006122664	1.44817737609555	0.0902695949110934	0.0623332448090513	0.375545189910824	0.362256141065143	0.0528641903054235	0.145930418598251	NA	NA	0.0677356630713048	0.375684337947926	0.190765774675778	0.183034896850586	0.273089056540634	0.0229875720844856	0.125591198618538	37.532537967076	28	14.2178982496262	28	5.34144169092178
dgrp371_02_1wf_9100_20s_021214	1	21214	dgrp371	0.708185411753344	0.436007920652628	0.382153511047363	0.246748131082014	0.645678042851822	57.8336110103805	0.268538110117578	0.615669164340943	0.541328430175781	0.249236701732961	0.460416796605397	1.87763045598453	1.84917406018154	0.689761527749168	0.373010601112074	0.597212465440676	0.564102375691541	0.385961748938361	0.684205147097999	NA	NA	0.460416796605397	0.412281200956729	0.179757869153312	0.183035612106323	0.291971532057704	0.0193938254898731	0.105956569143536	42.3030824083778	32	13.9522534608841	33	5.93200968205929
dgrp371_03_1wf_9100_20s_021214	1	21214	dgrp371	0.636871304920901	0.385300816968083	0.241161823272705	0.320211296584164	1.32778601620568	51.7751297680653	0.244932119241102	0.604990072548389	0.474332809448242	0.311851782286792	0.657453534891561	2.05480754214685	2.14639458455895	0.898736811397448	0.418719287619766	1.10544624194975	0.896927947041342	0.891143919148914	0.993551290366737	NA	NA	0.657453534891561	0.570175940214796	0.219689255580306	0.216312885284424	0.363128695079099	0.0114787053814577	0.0530652871943556	39.09373750999	32	12.3296261429787	32	7.03005617856979
dgrp371_04_1wf_9100_20s_021214	1	21214	dgrp371	0.777985101453556	0.612198094526927	0.665650367736816	0.156579028687027	0.235227134658379	NA	NA	0.786902079979579	0.848540306091309	0.160070099104514	0.188641715609075	1.33324658704866	1.22650939787842	0.357140050053874	0.291184112141045	0.312232096628956	0.272756370652347	0.124339105547494	0.455861416729202	NA	NA	0.188641715609075	0.285366149590599	0.174700613021851	0.174695014953613	0.222010612840653	0.00621116585455251	0.035554339408035	NA	24	14.6927542686462	25	4.36751532554626
dgrp371_05_1wf_9100_20s_021214	1	21214	dgrp371	0.707866370724864	0.5827615423636	0.557502508163452	0.353891386165324	0.634779899611802	58.5677025437229	0.354732530835805	0.823264907706868	0.807086944580078	0.355310032784349	0.440237616492749	1.43770832658796	1.27869781048779	0.633594202224441	0.495499559808223	0.619694039093876	0.454611108698484	0.545177683627461	1.1992176900126	13.6363636363636	NA	0.440237616492749	0.412752787982781	0.240536451339722	0.241264343261719	0.292173818035941	0.0199364394660122	0.0826331781832574	37.7918331951495	22	12.8207539319992	23	5.5323383808136
dgrp371_06_1wf_9100_20s_021214	1	21214	dgrp371	0.589363539420002	0.349916562889562	0.340994119644165	0.0506183607135788	0.148443500334845	53.21683239352	0.263629590959587	0.593719393014908	0.582383155822754	0.048136694223352	0.0826546814448085	1.69473426832172	1.71708262850986	0.134902457352945	0.0785649188414528	0.717435571393443	0.725330276543917	0.114838600510706	0.15832594367616	NA	NA	0.0826546814448085	0.696745613045742	0.243802830125346	0.241342544555664	0.410636460579998	0.0097965778714224	0.0405920053982147	39.1873006374514	33	11.5472465753555	33	8.04549339413643
dgrp371_07_1wf_9100_20s_021214	1	21214	dgrp371	0.486081960595245	0.590676461346447	0.482536792755127	0.50852223103577	1.05385172420174	62.6755347504112	0.351341202997657	NA	0.765484809875488	NA	NA	1.43416675391439	1.32085092660708	0.872323484097394	0.660425386790746	NA	0.634119883694923	NA	NA	18.75	17.6470588235294	NA	1.04395798797837	NA	0.24128532409668	0.507449145575591	NA	NA	40.6550369726803	16	9.45082338154316	17	10.4829039722681
dgrp371_09_1wf_9100_20s_021214	1	21214	dgrp371	0.666251343431897	0.503343862982897	0.482531547546387	0.234552715012296	0.486087834474176	67.2056661487705	0.463242971067814	0.755486451089382	0.723731994628906	0.232411767301505	0.321129601877935	1.43735564085574	1.39766153583672	0.392226866648613	0.280630794074048	0.630228210389587	0.534483201606416	0.298361348826862	0.55822399643267	3.84615384615385	NA	0.321129601877935	0.500935059806328	0.252142588106485	0.249587535858154	0.333748656568103	0.0172661528641737	0.0691787464658749	36.0731136894225	26	13.0869404375553	26	6.55570729076862
dgrp371_10_1wf_9100_20s_021214	1	21214	dgrp371	0.530035725085761	0.270616521960811	0.26630687713623	0.0363524848440587	0.13650599351763	76.7058606789599	0.460675080035601	0.510562796341746	0.507494926452637	0.038544431167659	0.0759503773507305	1.96970287932955	1.97046860304184	0.148311338896494	0.0752670398642962	0.902366395027408	0.878847456449624	0.125513285501014	0.142815780577056	NA	NA	0.0759503773507305	0.886789626002698	0.239979924299778	0.241267204284668	0.47003018241687	0.00565181297989386	0.0234255335143908	41.3693821714804	38	10.2834278345108	39	9.35921704769135
dgrp371_11_1wf_9100_20s_021214	1	21214	dgrp371	0.679946563520063	0.549426971624295	0.474228858947754	0.307227075367798	0.647845590944193	52.1509977133707	0.364429602089446	0.808044339219729	0.740447521209717	0.302914846934919	0.409096982916531	1.40210110582452	1.44822937959229	0.484545648242293	0.334577971604681	0.647822803999013	0.620003943199586	0.429020364332289	0.691963928678084	12.5	NA	0.409096982916531	0.470660624386631	0.258593641519547	0.257925987243652	0.320024074135897	0.00574947990851208	0.022291200549252	33.1456303681194	24	13.1862473189831	25	6.46484103798866
dgrp373_01_1wf_9100_20s_031214	1	31214	dgrp373	0.710537684670891	0.557091754674911	0.549022674560547	0.177087489715909	0.322550411706866	76.5784422177678	0.260938777620794	0.784042516946793	0.79036808013916	0.168575758960096	0.213287660769922	1.33818841562487	1.26523328197152	0.307747471605627	0.24323377830062	0.45658260590996	0.394515992821704	0.180951695456088	0.458667579384714	NA	NA	0.213287660769922	0.408948024373068	0.227821572468831	0.241270065307617	0.290572982388775	0.0286436619003428	0.118720330530115	56.5961571133589	25	13.9272938668728	26	5.92336088418961
dgrp373_03_1wf_9100_20s_031214	1	31214	dgrp373	0.632312296927863	0.349907685177667	0.366055011749268	0.0469672914965697	0.128306647878217	57.8336110103805	0.400121666836899	0.553377954023225	0.557405471801758	0.0355392856513058	0.063758408284778	1.81472357403247	1.79402616333779	0.12201573455303	0.06801223808577	0.591276268148969	0.5604516615892	0.100646962484396	0.179581879013444	NA	NA	0.063758408284778	0.580525657035047	0.203130388839377	0.199665069580078	0.367073511625387	0.0156286785060741	0.0782744750443493	34.6931301737102	35	12.2467689812183	36	7.31269399821758
dgrp373_04_1wf_9100_20s_031214	1	31214	dgrp373	0.613595367487525	0.309960511250374	0.29118537902832	0.09884696993102	0.339464056405821	59.3955556523382	0.342332947794179	0.505154581788259	0.482542991638184	0.101961271887843	0.211299871005679	2.055279745627	2.07235420952878	0.39719171110172	0.191662076528913	0.743698775761347	0.600045852028952	0.482676130251659	0.804398744895198	NA	NA	0.211299871005679	0.629738510078192	0.195194070537885	0.183037713170052	0.386404632512475	0.0514064343621963	0.280851598678121	39.0625	39	12.0884599387646	39	7.61256875097752
dgrp373_05_1wf_9100_20s_031214	1	31214	dgrp373	0.729585348878102	0.582708689073722	0.532447814941406	0.161563954430339	0.303436223976464	80.4774294841466	0.378399690821894	0.798684746026993	0.748767852783203	0.168577558425212	0.225139951987257	1.2909672405721	1.3355359269425	0.20489121062427	0.15341497483586	0.390705332113217	0.360001161575096	0.119686021646176	0.33246009852446	4.16666666666667	NA	0.225139951987257	0.368379660548154	0.214658029079437	0.216309547424316	0.268764403160622	0.0337469182352314	0.156012153125321	50.0247950492047	24	13.9850085377693	25	5.36645072698593
dgrp373_06_1wf_9100_20s_031214	1	31214	dgrp373	0.608099677365858	0.300135292857885	0.307823181152344	0.0307111115555947	0.0997686770717751	66.8679406619537	0.32042608870915	0.493562657618895	0.499177932739258	0.0300272917456886	0.0601534839108626	2.03356218619636	2.00329368430303	0.129019573005921	0.0644037237359975	0.649919612246328	0.628564129772642	0.0772328641684591	0.122871892477216	NA	NA	0.0601534839108626	0.64429819397797	0.193376627137385	0.191353797912598	0.391797523885408	0.00800938822147383	0.0418564371799518	45.4417079756083	40	12.0054117143154	41	7.92844171263278
dgrp373_07_1wf_9100_20s_031214	1	31214	dgrp373	0.603990109882875	0.306523672844234	0.324469566345215	0.0909786624267048	0.28039197466646	57.8336110103805	0.405008740786769	0.507497834531884	0.507511138916016	0.100747347033729	0.19851258289407	2.05951595432489	1.9704223181837	0.475989569873495	0.241567285084476	0.747153155898053	0.57893117474854	0.427292541948451	0.738071398787683	NA	NA	0.19851258289407	0.65415561113897	0.200514180537982	0.183038711547852	0.395103519452326	0.0555583204749876	0.303533170689213	34.4104930399144	38	11.6478995680809	39	7.82005304098129
dgrp373_08_1wf_9100_20s_031214	1	31214	dgrp373	0.540791468698045	0.225351654317068	0.158082962036133	0.141545503458401	NA	73.4541204596447	0.254273108111912	0.416707117920336	0.349404335021973	0.145113280336849	0.415316199004009	2.59156574020859	2.93159547194288	0.71334148563715	0.24332875816744	1.07028038326158	1.16784199283494	0.494067839986886	0.423060519332357	NA	NA	0.415316199004009	0.848348986626805	0.191176847574559	0.183042526245117	0.458779894446407	0.0407614673626689	0.222688509598497	54.7767129467441	46	10.3661760985851	47	8.98531183600426
dgrp373_09_1wf_9100_20s_031214	1	31214	dgrp373	0.820784877423627	NA	NA	0.138717531144842	0.16032419995818	83.8384934830922	0.343253085723666	1.04457054204411	1.04826521873474	0.136598061074995	0.130308683941521	0.975006457158905	0.961463555974488	0.13791406307377	0.143441799969202	0.224160845965468	0.222343946507195	0.0369010706049716	0.165963909450431	11.1111111111111	NA	0.130308683941521	0.218090174708172	0.18698347242255	0.191234827041626	0.179005117315144	0.00653179933363958	0.0341559089141112	55.0606718925973	18	15.4326186776161	19	3.55268597602844
dgrp373_10_1wf_9100_20s_031214	1	31214	dgrp373	0.594051936243665	0.387146489818891	0.391036510467529	0.158369926352833	0.405000357034393	64.2337649721702	0.279628629634267	0.651704785724481	0.682226181030273	0.175461622575652	0.257189811025248	1.66077181875795	1.54095279383076	0.511028734316095	0.331631660854253	0.934338900977108	0.69564079752996	0.852806519483408	NA	NA	NA	0.257189811025248	0.67934104142528	NA	NA	0.403563861028476	0.0833459397582652	0.323178410513799	46.2721652967526	30	11.6143946945667	31	8.15313948690891
dgrp373_11_1wf_9100_20s_031214	1	31214	dgrp373	0.538674408153964	0.208964461205052	0.216309547424316	0.0297254782693743	0.137421018273707	67.1875	0.325180552160609	0.387923498948415	0.391024351119995	0.0298643797730053	0.0763747313625507	2.59446408715667	2.55738548541987	0.221725609267437	0.086700112490485	0.87363261869339	0.839378820207595	0.145867700380727	0.1737805349254	NA	NA	0.0763747313625507	0.856408964047499	0.178959037743363	0.174825668334961	0.461325591846036	0.00608793366489164	0.0348228822625024	45.3394316517091	51	10.6571875214577	51	9.1269109249115
dgrp373_12_1wf_9100_20s_031214	1	31214	dgrp373	0.697929562410102	0.479865654238633	0.482541561126709	0.0277166622251957	0.0574389119156468	75.0162742759863	0.304804214596072	0.687555994306292	0.690520286560059	0.0271328540512049	0.0392933481887573	1.45671574727122	1.44832539586073	0.0590074146059308	0.0407418213990946	0.434248450141719	0.431033426420569	0.0258211715501583	0.0599052648064562	NA	NA	0.0392933481887573	0.432830925952958	0.20770069545713	0.207990646362305	0.302085498747908	0.00268586100764457	0.0129133740128198	52.1509977133707	28	13.4362383186817	29	6.02332016825676
dgrp377_01_1wf_9100_20s_021214	1	21214	dgrp377	0.729205181579334	0.557406718730927	0.415979623794556	NA	1.11994044419842	68.7932506313167	0.28211602762208	0.764403123855591	0.623968124389648	NA	0.760617495378997	1.69821248885258	1.60264597006166	0.758443390092625	0.473244499571821	0.591323676868655	0.459992720999344	0.372364731559448	0.809501356348591	12	NA	0.760617495378997	0.374295914246118	0.208635057394321	0.199726581573486	0.272938520112244	0.0271911690759537	0.136141963987648	49.3855720359995	25	13.9351679682732	26	5.42451149225235
dgrp377_02_1wf_9100_20s_021214	1	21214	dgrp377	0.449752391173897	0.215289003965331	0.174719333648682	0.136065864396273	0.778768219605671	46.9010344368864	0.267073734881953	0.478683400444868	0.407674491405487	0.176247576631452	0.432324269354764	2.3039129672231	2.45293738284294	0.678848265016934	0.276749121182276	1.71146825878042	1.22746503527818	1.45203475931058	1.18295407003712	NA	NA	0.432324269354764	1.22344565504122	NA	0.216305732727051	0.550247608826103	NA	NA	NA	41	8.82684916257858	41	10.799170255661
dgrp377_03_1wf_9100_20s_021214	1	21214	dgrp377	0.561874794211618	0.268046839208138	0.199566602706909	0.176176682688453	0.882796421339059	70.5897312379782	0.308127961124773	0.47705795306985	0.391023516654968	0.185474791705949	0.474331552466723	2.3317900417528	2.55739094301681	0.739703185559041	0.289241340898179	1.11261713333037	1.08374902050723	0.630286383718817	0.58157965709055	NA	NA	0.474331552466723	0.780405157841858	0.209185135861238	0.208056449890137	0.43848998746408	0.0173127438979644	0.0832117625149634	48.8390612752743	41	10.9899204075336	42	8.78577570617199
dgrp377_04_1wf_9100_20s_021214	1	21214	dgrp377	0.495386482974707	0.204697666379313	0.158071517944336	0.178819090924714	1.13125434139049	60.6765244967112	0.281727684395817	0.413208017203336	0.349415272474289	0.213073802105024	0.609801055907487	2.7894258676042	2.8619746603272	0.825759459833859	0.288527872479295	1.43404776813448	1.22229882166006	0.745518782222567	0.609931686925825	NA	NA	0.609801055907487	1.00779142545408	0.206292552987532	0.191357612609863	0.499246249827764	0.0665819667516895	0.347945220697521	43.5822677530667	48	9.82548798620701	49	10.1083350963891
dgrp377_05_1wf_9100_20s_021214	1	21214	dgrp377	0.644134808381369	0.276760458946228	0.274627685546875	0.105127744836227	0.382800971529447	75.065075934152	0.437602310479044	0.429662324322595	0.432610511779785	0.103583731722169	0.239438776686261	2.49629127407618	2.31154808487187	0.75031663843654	0.32459486495092	0.728186490470079	0.514716912990332	0.708862114270969	1.37718830755477	NA	NA	0.239438776686261	0.552876121503951	NA	NA	0.356126754583582	0.0281868404189179	0.188214299954833	42.2164252690822	45	12.4542206525803	46	7.03865545988083
dgrp377_06_1wf_9100_20s_021214	1	21214	dgrp377	0.355628411022912	0.102010732111724	0.0998406410217285	0.0156501047113794	0.156750843656677	53.3314005183625	0.179657770567333	0.286846407513688	0.28286075592041	0.0331129914288009	0.117064635993966	3.51606942186908	3.53530837724755	0.264849709157432	0.0749155889375719	1.85901595672338	1.75237102757276	0.439563510034549	0.250839293230839	NA	NA	0.117064635993966	NA	0.184835675401964	0.182953834533691	0.644371588977088	0.0291472181445769	0.15931460643537	43.75	69	7.03874051570892	69	12.7536616027355
dgrp377_07_1wf_9100_20s_021214	1	21214	dgrp377	0.786039276250252	0.778550885225597	0.732012271881104	0.160937137199179	0.219855791195423	NA	NA	0.990473261005	0.965157270431519	0.151681433372829	0.157157219885017	1.03170311361193	1.03610057203724	0.148061055042525	0.142902203742054	0.282971552815091	0.304796794216843	0.0601114714084629	0.197218187818922	5.26315789473684	NA	0.157157219885017	0.271948801370973	0.211725980043411	0.20799446105957	0.213762439006763	0.0183205669385344	0.0880819943242974	NA	19	14.7924668192863	20	4.23451960086823
dgrp377_08_1wf_9100_20s_021214	1	21214	dgrp377	0.66139698999978	0.415708911034369	0.40766716003418	0.153307724952464	0.376061012468138	NA	NA	0.628531604043899	0.598926544189453	0.157210759353301	0.262487546892848	1.68545604034902	1.66965383268049	0.392508163674075	0.235083558035462	0.586174390310551	0.51132010107597	0.237434059173303	0.464355026672472	NA	NA	0.262487546892848	0.510343314755092	0.212154263630509	0.216322898864746	0.337539532245528	0.0144190164480259	0.0666550629808324	NA	31	12.8869762420654	32	6.7889364361763
dgrp377_09_1wf_9100_20s_021214	1	21214	dgrp377	0.743124203001057	0.787583688894908	0.798763275146484	0.131165438885547	0.164210652851425	NA	NA	1.05982779959838	1.08155059814453	0.131161785410387	0.121271982684308	0.95852163116512	0.931765042505089	0.126329080859202	0.135580403960596	0.356537284253554	0.347364000984608	0.0681528313401209	0.196200041302325	NA	NA	0.121271982684308	0.345830888187175	NA	NA	0.256995303157242	0.0116125747191488	0.0422971306106146	NA	18	14.1765064001083	19	5.1750445663929
dgrp377_10_1wf_9100_20s_021214	1	21214	dgrp377	0.657100390256447	0.449256215776716	0.44926929473877	0.020144218804601	0.0448377377232379	78.18747501998	0.379207452862496	0.683694945914405	0.648958683013916	0.101288241146102	0.156078104503811	1.4841897838629	1.54094260349725	0.165327453665096	0.10728981941954	0.504739460838898	0.461563388664771	0.174364380230895	0.377769087655117	NA	NA	0.156078104503811	0.519807594906132	0.233526793019525	0.207992553710938	0.341565773471085	0.0840384304317855	0.404045380146541	48.5382017719033	28	12.579174041748	29	6.77227699756622
dgrp377_11_1wf_9100_20s_021214	1	21214	dgrp377	0.734022904162208	0.568423366546631	0.573428153991699	0.061987036302816	0.10809904583742	70.5897312379782	0.334477545692369	0.774394590854645	0.773881793022156	0.0611989280310449	0.0790804598103432	1.29957705505922	1.29218700971735	0.105029305804871	0.0812802674961458	0.367529090043719	0.359339043665596	0.0603892606286819	0.168056496206631	NA	NA	0.0790804598103432	0.361359595104124	0.205405237583014	0.199671864509583	0.265246219445209	0.0199567503172214	0.0999477335789775	46.9790511824153	25	14.2105841636658	26	5.34053617715836
dgrp379_02_1wf_C11440_20s_161215	1	161215	dgrp379	0.757987258408946	0.70221316530591	0.605807304382324	0.251387391725179	0.414962629051644	NA	NA	0.926418165365855	0.820484161376953	0.257631902356241	0.313999848484434	1.14618228388154	1.21879257037915	0.279237750212322	0.229110151307744	0.344011079314766	0.367081473785292	0.100360754066485	0.273401850089515	14.2857142857143	NA	0.313999848484434	0.319283390197154	0.224205000059945	0.222383975982666	0.242012741591054	0.00648844302190303	0.0291767560735076	NA	21	14.7464764714241	21	4.70830500125885
dgrp379_03_1wf_C11440_20s_161215	1	161215	dgrp379	0.573852412089199	0.253231305290352	0.253070831298828	0.0167098249056008	0.066028253117285	64.8137599279659	0.325478676658118	0.441282984885302	0.444753646850586	0.0171421537663327	0.0385430313786535	2.26979461477898	2.2484441883217	0.099206901001807	0.0441224654439201	0.747294092788912	0.735085435075195	0.0639607144280596	0.0870112661414885	NA	NA	0.0385430313786535	0.742929333664899	0.188132964902454	0.191680908203125	0.426331790135423	0.00521743126356877	0.0272193580074226	43.7182631173746	44	11.1421774327755	45	8.46598342061043
dgrp379_04_1wf_C11440_20s_161215	1	161215	dgrp379	0.522925653714623	0.225719043094179	0.230049133300781	0.0102383028000602	0.0445048527380191	48.2119994296026	0.172840776740034	0.431646528508928	0.429449081420898	0.0119319600381054	0.0277843417399488	2.31843740965074	2.32856476649419	0.0643854270237128	0.0276502624922257	0.913138953544646	0.900115246058626	0.0441350142291303	0.0490326260135979	NA	NA	0.0277843417399488	0.912745103591235	0.206023951371511	0.207038879394531	0.477297829970268	0.0058293383121815	0.0281557663431571	39.879	46	10.3830759823322	45	9.27107781171799
dgrp379_05_1wf_C11440_20s_161215	1	161215	dgrp379	0.720013571266578	0.474647415095362	0.429446220397949	0.165685636025981	0.385812304675654	70.1916800197858	0.234358506511224	0.659220095338493	0.61345100402832	0.175759614184475	0.286509620214691	1.57759090687385	1.63012203653323	0.248932761162008	0.152708052270376	0.408287771319155	0.421063425915825	0.0756091401066378	0.179567104272203	3.44827586206897	NA	0.286509620214691	0.388862710241554	0.18457268024313	0.184024810791016	0.279986428733422	0.0135100640156652	0.0734143616700016	53.7416627208351	29	13.7647750377655	29	5.35260772705078
dgrp379_07_1wf_C11440_20s_161215	1	161215	dgrp379	0.855693112650264	NA	0.690182685852051	NA	NA	83.0099315323173	0.222152076568321	NA	0.881886005401611	NA	NA	1.13838756900837	1.24195232362091	NA	0.539483798739041	0.344507835740359	0.307716102532703	0.287768014851146	NA	33.3333333333333	NA	NA	0.167607304495752	0.198790293473464	0.184066772460938	0.143420416086891	0.0300010668197985	0.162990128086075	64.5691028666188	12	14.2325749397278	13	2.58427381515503
dgrp379_08_1wf_C11440_20s_161215	1	161215	dgrp379	0.512116619364285	0.234692558646202	0.207083940505981	0.0686064079764921	0.331297578213268	75.3376379043038	0.341996516316701	0.458279520273209	0.444745063781738	0.0594510086755663	0.13367435305531	2.20782611024352	2.28766908107165	0.22181908667982	0.0969629255014059	1.00210290344071	1.03680778158506	0.193512326330161	0.18664243244232	NA	NA	0.13367435305531	0.961222232994086	0.225591705288998	0.23005485534668	0.492257880418721	0.0230659967817849	0.100263029645802	49.5724281935029	43	10.0917800217867	43	9.70044332742691
dgrp379_09_1wf_C11440_20s_161215	1	161215	dgrp379	0.699205284536781	0.482562160917691	0.460105180740356	0.14105438113435	0.306569860629212	51.1164647545192	0.202730468586701	0.690158057425703	0.682491302490234	0.141765700425715	0.207717959054494	1.50372593345632	1.48187886076719	0.27865627821488	0.18804254895074	0.459411712258103	0.461582612688452	0.109383580157553	0.236975087775636	NA	NA	0.207717959054494	0.430157108972121	0.207577544039693	0.207047462463379	0.300768123774371	0.00986421846027585	0.0476423055028775	40.7535999023399	28	13.5117405056953	29	6.01974877715111
dgrp379_11_1wf_C11440_20s_161215	1	161215	dgrp379	0.700409971527749	0.541579787929853	0.490793228149414	0.299976473416857	0.611207441773288	60.2149048076969	0.311220599423257	0.77323254942894	0.705513000488281	0.304394886146259	0.431451845586955	1.48608363070425	1.41748113541675	0.541163275757518	0.381778114880105	0.56353209570346	0.51557028878776	0.295617633841706	0.573379886837118	8.33333333333333	NA	0.431451845586955	0.425916182627589	0.230667595863342	0.230053901672363	0.298315941347398	0.0205771379655219	0.0894448553836194	41.4747860392311	24	12.9979149103165	25	5.76668989658356
dgrp38_01_1wf_9100_20s_050614	1	50614	dgrp38	0.681714157596953	0.446047963767216	0.447354316711426	0.0200184038013381	0.0447484310613042	76.7058606789599	0.44963233714602	0.654303506530564	0.66168737411499	0.0209713857706233	0.031693797692109	1.52978590784493	1.51128771549783	0.0515733559262512	0.0341254384571389	0.46709233467433	0.460092892438826	0.0249356142960964	0.0541969126363148	NA	NA	0.031693797692109	0.466650168098911	0.208148357272148	0.205057144165039	0.318122026238025	0.00636299309786035	0.0310303409509065	42.2164252690822	29	12.9353909492493	30	6.24445071816444
dgrp38_02_1wf_9100_20s_050614	1	50614	dgrp38	0.683582343681903	0.415890341624618	0.391435623168945	0.143152039745883	0.365710301446166	90.9611223614243	0.295506141729324	0.608398308511823	0.587149620056152	0.143766581571036	0.244855104491572	1.73447855865403	1.70316553049314	0.400323679660683	0.235046842184959	0.518528367827012	0.522718174976039	0.176368993987123	0.337407426086165	NA	NA	0.244855104491572	0.463803150013268	0.192891250505592	0.195711135864258	0.317047644293119	0.0150496011788389	0.0768970100366544	64.0815520450309	32	13.3084909319878	33	6.36541126668453
dgrp38_03_1wf_9100_20s_050614	1	50614	dgrp38	0.68599488831335	0.384508872032166	0.410062789916992	0.126247784960755	0.307874276976732	72.0276910726007	0.3058225349803	0.560512736439705	0.587048530578613	0.129332035819394	0.220308933729755	1.88252139544747	1.70343668012314	0.483972913528573	0.284115587726799	0.517737585860789	0.431813556937253	0.240798114577513	0.557643711525489	NA	NA	0.220308933729755	0.459153617408802	0.176548639519347	0.17706298828125	0.314977034493022	0.011821688468648	0.0667654408377556	50	35	13.4578105211258	36	6.3557510226965
dgrp38_04_1wf_9100_20s_050614	1	50614	dgrp38	0.614648138652389	0.296197401314247	0.298225402832031	0.0119139190939848	0.0399493771518015	100.109802997758	0.304617631625563	0.481897499866602	0.484607696533203	0.0125263208208359	0.0258483736648158	2.07645962205481	2.06352479986146	0.0540020987734334	0.0261698326945521	0.629278239286474	0.625034276609642	0.0247073094626784	0.0395295272392062	NA	NA	0.0258483736648158	0.626947089097986	0.185700098552355	0.186391830444336	0.385351861347611	0.00326004801959757	0.0174902945683081	69.6145919060796	41	12.1440934538841	41	7.61370404064655
dgrp38_05_1wf_9100_20s_050614	1	50614	dgrp38	0.68063897860452	0.465327174535819	0.484621047973633	0.103152872448713	0.212852646165556	79.118680632326	0.445624411349371	0.683662248509271	0.680342793464661	0.106266299856392	0.15619523110582	1.50037042050666	1.46985371214542	0.249553661382023	0.169781291376113	0.497387596551066	0.475823581568922	0.139072233725582	0.292276883938838	NA	NA	0.15619523110582	0.470985685864598	0.219162438450188	NA	0.320571216164229	0.0324689744872729	0.145175156670135	43.8614651488069	28	13.0291608870029	29	6.35571071505547
dgrp38_06_1wf_9100_20s_050614	1	50614	dgrp38	0.509063793153111	0.211777262231137	0.214367866516113	0.019266004286115	0.0898735645375602	93.75	0.333333333333333	0.416013209109611	0.419381976127625	0.0181972902476426	0.043390730368691	2.40864894964534	2.38446108064426	0.116996449347418	0.0490662021272356	0.980530266277204	0.913010690976069	0.210890925761576	0.230984070445133	NA	NA	0.043390730368691	0.964390344491127	0.204235946878474	0.195731163024902	0.490936206846889	0.0217798006477724	0.111274057289495	62.5	47	9.95353132486343	47	9.59908950328827
dgrp38_07_1wf_9100_20s_050614	1	50614	dgrp38	0.722277888453925	0.522973445745615	0.344833374023438	NA	NA	93.8020688737727	0.41603939439272	0.724061270745901	0.559171199798584	NA	NA	1.69773014978313	1.8189602234288	0.67208817924825	0.369490311328162	0.617041065953604	0.594312722807464	0.44869013888674	0.754973133954091	11.5384615384615	NA	NA	0.383474923916794	0.200547202317803	0.195697784423828	0.276975458321651	0.0166364128728435	0.0850107369474021	54.7767129467441	26	13.597309589386	27	5.41477446258068
dgrp38_08_1wf_9100_20s_050614	1	50614	dgrp38	0.601534287553403	0.25629397838012	0.279692649841309	0.068780314236738	0.245913913990097	84.3894862152696	0.239856345108569	0.426067114848158	0.456667900085449	0.0731067556061512	0.16008735361621	2.41769629489415	2.18994889445358	0.515779019440149	0.235521030078121	0.729062939062777	0.613312904099276	0.302888767367843	0.493856831224955	NA	NA	0.16008735361621	0.663021279383065	0.169928361443763	NA	0.398830032926438	0.00680947844698129	0.0405906216965696	64.1481324860851	46	11.7895230054855	47	7.98663298785686
dgrp38_09_1wf_9100_20s_050614	1	50614	dgrp38	0.662560300167231	0.406144426714989	0.410074234008789	0.0546267198901886	0.133211783037843	79.3842076186434	0.36939721239965	0.612992397239131	0.615097045898438	0.0555393337870823	0.0902936116462063	1.64754433704136	1.62575971819106	0.18409270503391	0.11323487903781	0.522404982629987	0.500006977036248	0.108966994557876	0.217930948091503	NA	NA	0.0902936116462063	0.508439538384424	0.206499884836376	0.20503044128418	0.336871853168872	0.0142747038264833	0.0696223630846021	50.0599026157615	31	12.5904772281647	32	6.60799631476402
dgrp38_10_1wf_9100_20s_050614	1	50614	dgrp38	0.761401389416808	NA	NA	NA	0.473556495086738	89.5545617556694	0.414794264019347	NA	NA	NA	0.351526125659073	1.06019613775687	0.958036738068807	0.50654570554073	0.528733069842202	0.46597865582396	0.349399090622164	NA	NA	35.2941176470588	NA	0.351526125659073	0.313368409969896	NA	NA	0.238599142750414	0.0169609476198072	0.0627786094119751	52.4078432226513	17	14.1564296483994	18	4.69712948799133
dgrp38_11_1wf_9100_20s_050614	1	50614	dgrp38	0.53251574238579	0.219316983476598	0.223671674728394	0.0267776523599854	0.119718566924049	90.6788633034182	0.326000345369669	0.411850704157606	0.419384002685547	0.0286405616889589	0.0682919746713217	2.43950339861131	2.38444955839147	0.179451945555806	0.0752592752169028	0.89151813491967	0.874997868167477	0.117829262164574	0.13466234199101	NA	NA	0.0682919746713217	0.878169170405944	0.192597413435578	0.195708274841309	0.467638907719035	0.00571256453954735	0.0291891824409541	61.1175225487748	47	10.3078982234001	48	9.24467584490776
dgrp38_12_1wf_9100_20s_050614	1	50614	dgrp38	0.522663098831146	0.224717122978634	0.223672866821289	0.00572636805477531	0.0256015319880108	109.653662872017	0.314693739959453	0.429946409993701	0.428705215454102	0.00588948618899422	0.0137378459059702	2.32628906853468	2.33260516539497	0.0318386316436114	0.0136493874385382	0.913857263933181	0.916656540397419	0.0240588506732816	0.0262463088550602	NA	NA	0.0137378459059702	0.913259314758138	0.205225005745888	0.205032348632813	0.477326943487897	0.00137335571346971	0.0066982391931198	75.1463416025691	45	10.1122705340385	46	9.44035026431084
dgrp380_01_1wf_11440_20s_200215	1	200215	dgrp380	0.612387125232842	0.3618939422792	0.352762222290039	0.0278457424993524	0.0789362940243011	76.4909195787317	0.363270925328319	0.590956157253635	0.582797050476074	0.0317337605255704	0.0544507912310946	1.69651949104946	1.71586317944321	0.0862235680334561	0.0502508411314213	0.634136939504469	0.638206445091829	0.0455702486689079	0.0714036171514235	NA	NA	0.0544507912310946	0.632953990696294	0.229062214974434	0.230038642883301	0.387612874767158	0.00870876302404176	0.0378578264716148	48.7039924441518	31	11.2187122106552	31	7.10092866420746
dgrp380_02_1wf_11440_20s_200215	1	200215	dgrp380	0.581815881696905	0.305074023233878	0.314386367797852	0.0353623845917143	0.112480655059611	75.7328353225997	0.282302207360708	0.524348050355911	0.529117584228516	0.0344582008654192	0.0651239004193393	1.91594923790792	1.88993907934105	0.138928946623479	0.0735097486168278	0.729357143799851	0.707277492310586	0.0994360133253628	0.140589817160048	NA	NA	0.0651239004193393	0.718363120602425	0.219153927345025	0.222369194030762	0.41795507239184	0.00496576445638049	0.0223311708171841	54.3532887413448	37	11.2877388596535	38	8.32784923911095
dgrp380_03_1wf_11440_20s_200215	1	200215	dgrp380	0.442696429016886	0.165754957840993	0.168697834014893	0.00475157677070951	0.0281661990413584	72.4971558959384	0.350993745840186	0.374421266982189	0.375747680664063	0.00383566687797976	0.0102080919600114	2.67103654679628	2.6613654721424	0.0275641510574695	0.0103571461139008	NA	NA	0.0558399585323932	0.0454939482987263	NA	NA	0.0102080919600114	NA	0.208635710882691	0.207046508789063	0.557221849507324	0.00407751264348453	0.0196937039283221	47.0511075852631	52	8.61925780773163	53	11.0576926767826
dgrp380_04_1wf_11440_20s_200215	1	200215	dgrp380	0.626112581166623	0.375514991355665	0.368075370788574	0.0961669461508461	0.261269712083195	67.0651476178201	0.29254683707804	0.599756341992003	0.598114013671875	0.0984814639992277	0.164653329880437	1.71578375104967	1.67192203683861	0.306839011520561	0.183524712731673	0.663616093673925	0.595685990715249	0.282528040926076	0.474290222247531	NA	NA	0.164653329880437	0.597156853383651	0.224241350636338	0.222377777099609	0.373887418833377	0.0128042787307797	0.0575789491997857	47.445450804055	33	12.3919947147369	33	7.39996457099915
dgrp380_05_1wf_11440_20s_200215	1	200215	dgrp380	0.807916543780434	NA	0.789838790893555	NA	NA	NA	0.320063950377031	NA	1.00455284118652	NA	NA	0.964326084730362	0.99546779323112	0.369071476887963	0.37075180070871	0.316164331528622	0.271845410441364	0.184734290679535	0.679556408105633	33.3333333333333	NA	NA	0.238363987311794	0.23628069460392	0.237716674804688	0.192578208790668	0.0106730502158208	0.0448981975058752	NA	15	14.8689005374908	16	3.78049111366272
dgrp380_06_1wf_11440_20s_200215	1	200215	dgrp380	0.729894779317013	0.688999891281128	0.690149307250977	0.116105509117768	0.168232450424739	67.7339578793385	0.278889744907202	0.943971529603004	0.943209648132324	0.115737269651387	0.122705773716969	1.07440872323817	1.06890224509268	0.124121503884578	0.116120538107595	0.380097202181654	0.370790096613632	0.0616631428672688	0.166302022169493	NA	NA	0.122705773716969	0.370060491370734	0.254971638321877	0.253055930137634	0.270105220682987	0.00383454894266789	0.0151529700986747	48.8436516448146	20	13.7799978256226	20	5.09943276643753
dgrp380_07_1wf_11440_20s_200215	1	200215	dgrp380	0.674304731446628	0.493332491980659	0.490773677825928	0.0274899927337224	0.0560135842156409	77.2493448321732	0.426168828730734	0.73161653622433	0.728490829467773	0.0275700240221389	0.0378453961352969	1.36874053574502	1.37270087631795	0.0510510910319743	0.0371902516511178	0.485389201009612	0.492039257402032	0.0302899816296966	0.061560091342361	NA	NA	0.0378453961352969	0.483009021536358	0.238284044243671	0.237716674804688	0.325695268553373	0.00466525346892267	0.0196252680749288	44.3280820248294	27	13.3199772834778	27	6.43366919457912
dgrp380_08_1wf_11440_20s_200215	1	200215	dgrp380	0.660801742451354	0.487235539234602	0.475436210632324	0.046787555980876	0.09840974442954	67.7428307424483	0.289843670942805	0.737339973449707	0.720837593078613	0.0480735864244496	0.0666912864784603	1.36110220789899	1.38728605127757	0.0840689714113195	0.0605995939582172	0.517571984533533	0.532196304891576	0.0490992818993816	0.0922578406653623	NA	NA	0.0666912864784603	0.512954975108059	0.249929893899847	0.253039836883545	0.338961541350497	0.00488439921716457	0.0193028863649343	48.108	26	12.6681240200996	27	6.74810713529587
dgrp380_09_1wf_11440_20s_200215	1	200215	dgrp380	0.67286987719422	0.501095426770357	0.513765335083008	0.0443288047155448	0.0862822025709125	76.7210623623005	0.328444294171129	0.744713716208935	0.751499176025391	0.0429306169443134	0.0571266320894315	1.3481773140347	1.33067598135793	0.0967129170085996	0.0726795390940371	0.490515453779761	0.477634685634522	0.0537189097610339	0.112468611214175	NA	NA	0.0571266320894315	0.486301830901764	0.243683623494925	0.245384216308594	0.327217853238194	0.00466470484672515	0.0190097998840269	51.5224671866556	26	13.0284810960293	27	6.57945783436298
dgrp380_11_1wf_11440_20s_200215	1	200215	dgrp380	0.528908781733648	0.182157430732459	0.176375389099121	0.0299082825872832	0.169571745468837	80.8581623152542	0.303085535087657	0.344402356367362	0.337423324584961	0.0299908491226808	0.0888819679539649	2.91675960846836	2.96363626086023	0.163263536400246	0.055088925235669	0.902073818416345	0.912976240686068	0.075946880782183	0.0831860429632997	NA	NA	0.0888819679539649	0.890572524656438	NA	NA	0.471031629061496	0.00333811552300068	0.0207287543424659	56.3512229237308	57	10.3829735517502	58	9.40901537239552
dgrp380_12_1wf_11440_20s_200215	1	200215	dgrp380	0.699489371978788	0.549050368070602	0.552121996879578	0.129627624555089	0.234780764555123	70.1716974356471	0.353206674188277	0.784930250644684	0.79750394821167	0.132561304949974	0.166220249125074	1.31331109760622	1.25391228750956	0.247101107266988	0.197064108652898	0.458406466926649	0.440009286167342	0.157440891099156	0.357812655434002	NA	NA	0.166220249125074	0.429614287306606	0.235879882574081	0.230053901672363	0.300510628021212	0.0154127094824814	0.0669960794858926	45.3865855622562	25	13.7262592017651	25	5.89699706435204
dgrp382_01_1wf_9100_20s_021214	1	21214	dgrp382	0.484080550493282	0.201968323677144	0.199670791625977	0.0118235216845565	0.0592150789220306	61.2571743247271	0.309418319164916	0.417220488349174	0.415982723236084	0.0126683613360648	0.0304540564509817	2.39901451843474	2.40394599136385	0.0730220860006188	0.0303759261909169	1.06926535774629	1.08333572145006	0.0822525123400322	0.075925228635437	NA	NA	0.0304540564509817	1.06588087523705	0.215274173611154	0.216309547424316	0.515972200845013	0.00657155623224966	0.0303803336953907	42.3030824083778	47	9.49251121282578	48	10.3331603333354
dgrp382_02_1wf_9100_20s_021214	1	21214	dgrp382	0.701897590081502	0.649997866153717	0.631623268127441	0.0795137525551765	0.125887940751311	62.5195281991955	0.399666967295525	0.926057982444763	0.899330139160156	0.0782827408080149	0.0870456102818033	1.08624783924832	1.11245777528815	0.0849587774465379	0.0763703390221099	0.431099729190603	0.43205459772344	0.0569302153725026	0.131766252858959	NA	NA	0.0870456102818033	0.424477727082864	0.275909616833641	0.27448582649231	0.297939893682736	0.0110310678546524	0.0401881146127646	37.532537967076	20	12.9999573230743	21	5.79410195350647
[truncated: 1,319 more rows]
