# Supplementary material for: Genetic architecture of natural variation of cardiac performance from flies to humans
Source: eLife. 2022 Nov 16;11:e82459. doi: 10.7554/eLife.82459 (PMC9668334; doi:10.7554/eLife.82459)
Supplement: Figure 1—source data 3. — Single nucleotide polymorphism (SNP) ID, position, associated genes, and statistics are indicated for both focal SNPs (left) and their interacting SNPs (right). Each sheet displays the results for indicated quantitative traits, except for the first one which is a merge of all quantitative traits association analyses. [file elife-82459-fig1-data3.xlsx]

## Sheet: Read Me
Dataset S3
SNPs ID, position, associated genes and statistics are indicated for both focal SNPs ("1" - left) and their interacting SNPs ("2"- right). Each sheet displays the results for indicated quantitative trait, except for the first one which is a merge of all quantitative traits association analyses.

## Sheet: All_phenotypes_merged
1_ID	1_FlybaseID	1_GeneSymbol	1_Position	1_Type	1_NbOfLinesForMutationInEpistasis	1_NbOfLinesForMutationInDB	1_TotalNbOfLinesinDB	1_CHR	1_SNP	N_SIG	N_TOT	PROP	CHISQ	2_CHR	2_SNP	2_ID	2_FlybaseID	2_GeneSymbol	2_Position	2_Type	2_NbOfLinesForMutationInEpistasis	2_NbOfLinesForMutationInDB	2_TotalNbOfLinesinDB		Cardiac Trait
2L_11190559_SNP	FBgn0259822	Ca-beta	0	INTRON	42	50	205	1	2L_11190559_SNP	10172	1345972	0.00756	23.91303	1	2L_1831426_SNP	2L_1831426_SNP	FBgn0031367	c-cup	201	DOWNSTREAM	94	113	205		FS
2L_11190564_SNP	FBgn0259822	Ca-beta	0	INTRON	41	49	205	1	2L_11190564_SNP	10199	1345713	0.00758	22.90160	1	2L_1831426_SNP	2L_1831426_SNP	FBgn0031367	c-cup	201	DOWNSTREAM	94	113	205		FS
2L_12163772_SNP	FBgn0051760	CG31760	0	INTRON	11	13	205	1	2L_12163772_SNP	545	1110568	0.00049	11.50622	2	2R_12441133_SNP	2R_12441133_SNP	FBgn0034135	Syn2	0	INTRON	12	14	205		FS
2L_12599794_SNP	FBgn0085424	nub	0	INTRON	12	14	205	1	2L_12599794_SNP	3560	1091559	0.00326	16.16473	2	2R_14508948_SNP	2R_14508948_SNP	FBgn0034366	Atg7	0	INTRON	13	16	205		FS
2L_12600138_SNP	FBgn0085424	nub	0	INTRON	17	21	205	1	2L_12600138_SNP	5719	1214511	0.00471	17.32547	1	2L_10131351_SNP	2L_10131351_SNP	FBgn0265002	CG44153	0	INTRON	72	91	205		FS
2L_15191720_SNP	FBgn0028888	CG4168	0	INTRON	56	79	205	1	2L_15191720_SNP	15414	1357467	0.01135	28.20639	1	2L_17502449_SNP	2L_17502449_SNP	FBgn0013810	Dhc36C	0	INTRON	55	71	205		FS
2L_4341367_SNP	FBgn0020762	Atet	0	INTRON	61	80	205	1	2L_4341367_SNP	18580	1358740	0.01367	35.17159	1	2L_17624989_SNP	2L_17624989_SNP	FBgn0032654	CG15147	111	DOWNSTREAM	61	83	205		FS
2L_4686131_SNP	FBgn0031620	CG11929	0	NON_SYNONYMOUS_CODING	94	127	205	1	2L_4686131_SNP	20192	1350259	0.01495	33.00398	2	2R_6934177_SNP	2R_6934177_SNP	FBgn0040765	luna	0	INTRON	48	65	205		FS
2L_7210639_SNP	FBgn0031897	CG13784	0	INTRON	23	25	205	1	2L_7210639_SNP	6448	1268293	0.00508	20.53855	1	2L_1029907_SNP	2L_1029907_SNP	FBgn0031294	IA-2	0	INTRON	39	50	205		FS
2L_7900140_SNP	FBgn0085450	Snoo	0	INTRON	43	55	205	1	2L_7900140_SNP	16945	1345862	0.01259	25.98316	1	2L_7105739_SNP	2L_7105739_SNP	FBgn0085407	Pvf3	0	INTRON	96	126	205		FS
2L_7900144_SNP	FBgn0085450	Snoo	0	INTRON	43	55	205	1	2L_7900144_SNP	17218	1346742	0.01278	26.19273	1	2L_7105739_SNP	2L_7105739_SNP	FBgn0085407	Pvf3	0	INTRON	96	126	205		FS
2R_12567383_SNP	FBgn0050463	CG30463	0	INTRON	44	50	205	2	2R_12567383_SNP	18565	1347400	0.01378	30.84999	1	2L_16817694_SNP	2L_16817694_SNP	FBgn0004797	mdy	0	INTRON	15	17	205		FS
2R_16139153_SNP	FBgn0034490	CG9864	0	INTRON	70	91	205	2	2R_16139153_SNP	15981	1360978	0.01174	32.40640	4	3R_15621363_SNP	3R_15621363_SNP	FBgn0014135	bnl	0	INTRON	20	27	205		FS
2R_2583342_SNP	FBgn0259483	Mob4	0	INTRON	72	91	205	2	2R_2583342_SNP	20187	1361154	0.01483	31.45918	4	3R_17486963_SNP	3R_17486963_SNP	FBgn0038893	CG6353	0	UTR_3_PRIME	42	57	205		FS
2R_2869600_SNP	FBgn0050156	CG30156	0	NON_SYNONYMOUS_CODING	9	10	205	2	2R_2869600_SNP	1	1050590	0.00000	7.22553	2	2R_7648286_SNP	2R_7648286_SNP	FBgn0033652	ths	0	INTRON	8	11	205		FS
3L_11508722_SNP	FBgn0036168	CG7512	0	INTRON	17	19	205	3	3L_11508722_SNP	1985	1219446	0.00163	15.35005	3	3L_1281914_SNP	3L_1281914_SNP	FBgn0052333	CG32333	0	INTRON	15	16	205		FS
3L_11513190_SNP	FBgn0036169	Fuca	0	INTRON	14	16	205	3	3L_11513190_SNP	10	1168165	0.00001	8.03444	1	2L_13888761_SNP	2L_13888761_SNP	FBgn0028509	cenG1A	0	INTRON	138	181	205		FS
3L_11638743_SNP	FBgn0036186	CG6071	0	NON_SYNONYMOUS_CODING	82	102	205	3	3L_11638743_SNP	16878	1360996	0.01240	28.72010	4	3R_17042030_SNP	3R_17042030_SNP	FBgn0038868	CG5862	82	DOWNSTREAM	15	18	205		FS
3L_12287863_SNP	FBgn0036274	CG4328	0	INTRON	28	35	205	3	3L_12287863_SNP	8213	1303852	0.00630	25.18176	3	3L_2762921_SNP	3L_2762921_SNP	FBgn0052296	Mrtf	0	INTRON	67	90	205		FS
3L_14072155_SNP	FBgn0005592	btl	0	INTRON	50	63	205	3	3L_14072155_SNP	12787	1351955	0.00946	30.10592	4	3R_20842801_SNP	3R_20842801_SNP	FBgn0039257	tnc	0	NON_SYNONYMOUS_CODING	114	147	205		FS
3L_14072337_SNP	FBgn0005592	btl	0	INTRON	63	79	205	3	3L_14072337_SNP	14551	1359287	0.01070	32.47923	3	3L_10074676_SNP	3L_10074676_SNP	FBgn0040823	dpr6	0	INTRON	128	166	205		FS
3L_14101884_SNP	FBgn0036411	Sox21a	666	UPSTREAM	44	57	205	3	3L_14101884_SNP	21105	1340386	0.01575	44.17499	3	3L_23265047_SNP	3L_23265047_SNP	FBgn0037212	nAcRalpha-80B	0	INTRON	14	25	205		FS
3L_15055188_SNP	FBgn0261090	Sytbeta	0	INTRON	55	71	205	3	3L_15055188_SNP	17719	1356849	0.01306	29.14485	1	2L_12132429_SNP	2L_12132429_SNP	FBgn0032415	rho-6	0	INTRON	7	11	205		FS
3L_15055200_SNP	FBgn0261090	Sytbeta	0	INTRON	61	78	205	3	3L_15055200_SNP	16852	1358722	0.01240	27.24223	1	2L_12132429_SNP	2L_12132429_SNP	FBgn0032415	rho-6	0	INTRON	7	11	205		FS
3L_15055205_SNP	FBgn0261090	Sytbeta	0	INTRON	61	78	205	3	3L_15055205_SNP	17313	1358894	0.01274	27.93065	5	X_312375_SNP	X_312375_SNP	FBgn0052816	CG32816	0	INTRON	59	83	205		FS
3L_15055212_SNP	FBgn0261090	Sytbeta	0	INTRON	63	80	205	3	3L_15055212_SNP	17484	1359494	0.01286	27.08182	1	2L_12132429_SNP	2L_12132429_SNP	FBgn0032415	rho-6	0	INTRON	7	11	205		FS
3L_15055287_SNP	FBgn0261090	Sytbeta	0	INTRON	62	79	205	3	3L_15055287_SNP	17152	1359316	0.01262	29.24930	1	2L_12132429_SNP	2L_12132429_SNP	FBgn0032415	rho-6	0	INTRON	7	11	205		FS
3L_16860553_SNP	FBgn0261565	Lmpt	0	INTRON	8	8	205	3	3L_16860553_SNP	17571	970351	0.01811	15.68514	4	3R_20716887_SNP	3R_20716887_SNP	FBgn0051121	CG31121	0	INTRON	10	12	205		FS
3L_2328726_SNP	FBgn0035331	DmsR-1	0	INTRON	11	16	205	3	3L_2328726_SNP	220	1113366	0.00020	10.41974	5	X_19237040_SNP	X_19237040_SNP	FBgn0086778	gfA	0	INTRON	24	35	205		FS
3L_4534458_SNP	FBgn0035557	CG11353	0	INTRON	42	53	205	3	3L_4534458_SNP	16103	1346407	0.01196	23.00493	3	3L_10984029_SNP	3L_10984029_SNP	FBgn0013469	klu	0	INTRON	40	55	205		FS
3L_8775199_SNP	FBgn0261259	Fhos	0	INTRON	17	21	205	3	3L_8775199_SNP	603	1186022	0.00051	12.72715	3	3L_2046232_SNP	3L_2046232_SNP	FBgn0086906	sls	0	INTRON	18	27	205		FS
3L_938314_SNP	FBgn0264574	Glut1	0	INTRON	49	65	205	3	3L_938314_SNP	22347	1353993	0.01650	32.39278	2	2R_14580701_SNP	2R_14580701_SNP	FBgn0262103	Sik3	0	INTRON	120	153	205		FS
3R_11817181_SNP	FBgn0003507	srp	0	INTRON	33	45	205	4	3R_11817181_SNP	5029	1319429	0.00381	19.00009	2	2R_16425831_SNP	2R_16425831_SNP	FBgn0034513	CG13423	62	DOWNSTREAM	51	63	205		FS
3R_12546376_SNP	FBgn0003944	Ubx	0	INTRON	81	106	205	4	3R_12546376_SNP	16928	1357967	0.01247	30.32125	4	3R_24874996_SNP	3R_24874996_SNP	FBgn0003093	Pkc98E	126	DOWNSTREAM	25	30	205		FS
3R_19781053_SNP	FBgn0005674	Aats-glupro	0	INTRON	47	59	205	4	3R_19781053_SNP	19636	1351037	0.01453	28.31227	5	X_222372_SNP	X_222372_SNP	FBgn0052816	CG32816	0	INTRON	66	92	205		FS
3R_20617376_SNP	FBgn0039225	Ets96B	0	INTRON	102	137	205	4	3R_20617376_SNP	18851	1350507	0.01396	28.90598	4	3R_23508084_SNP	3R_23508084_SNP	FBgn0003330	Sce	333	UPSTREAM	86	109	205		FS
3R_21194376_SNP	FBgn0004509	Fur1	0	INTRON	136	176	205	4	3R_21194376_SNP	4383	1174072	0.00373	16.51324	3	3L_507546_SNP	3L_507546_SNP	FBgn0001316	klar	0	INTRON	18	24	205		FS
3R_21194412_SNP	FBgn0004509	Fur1	0	INTRON	136	176	205	4	3R_21194412_SNP	3803	1174071	0.00324	18.11796	3	3L_507546_SNP	3L_507546_SNP	FBgn0001316	klar	0	INTRON	18	24	205		FS
3R_21194422_SNP	FBgn0004509	Fur1	0	INTRON	134	172	205	4	3R_21194422_SNP	4487	1174071	0.00382	16.49367	3	3L_507546_SNP	3L_507546_SNP	FBgn0001316	klar	0	INTRON	18	24	205		FS
3R_21194431_SNP	FBgn0004509	Fur1	0	INTRON	135	172	205	4	3R_21194431_SNP	3893	1174070	0.00332	17.25763	3	3L_507546_SNP	3L_507546_SNP	FBgn0001316	klar	0	INTRON	18	24	205		FS
3R_21194440_SNP	FBgn0004509	Fur1	0	INTRON	134	172	205	4	3R_21194440_SNP	4524	1174071	0.00385	16.34867	3	3L_507546_SNP	3L_507546_SNP	FBgn0001316	klar	0	INTRON	18	24	205		FS
3R_25318629_SNP	FBgn0039665	CG2310	0	INTRON	33	43	205	4	3R_25318629_SNP	11463	1324870	0.00865	26.68358	5	X_2413556_SNP	X_2413556_SNP	FBgn0261451	trol	0	INTRON	71	89	205		FS
3R_3402277_SNP	FBgn0083963	CG34127	0	INTRON	97	129	205	4	3R_3402277_SNP	15972	1348423	0.01184	29.58648	1	2L_10119466_SNP	2L_10119466_SNP	FBgn0265002	CG44153	0	INTRON	73	89	205		FS
3R_5096375_SNP	FBgn0261241	Vps16A	429	DOWNSTREAM	44	62	205	4	3R_5096375_SNP	11252	1348829	0.00834	21.63884	3	3L_1700663_SNP	3L_1700663_SNP	FBgn0035260	CG7991	0	INTRON	65	79	205		FS
3R_5096376_SNP	FBgn0261241	Vps16A	430	DOWNSTREAM	51	69	205	4	3R_5096376_SNP	14079	1355004	0.01039	23.96077	5	X_16893482_SNP	X_16893482_SNP	FBgn0030810	CG9059	0	INTRON	119	159	205		FS
X_11123801_SNP	FBgn0261569	CG42683	0	INTRON	47	69	205	5	X_11123801_SNP	7912	1351032	0.00586	18.64733	5	X_7528359_SNP	X_7528359_SNP	FBgn0004198	ct	0	INTRON	71	88	205		FS
X_13749375_SNP	FBgn0264981	mamo	0	NON_SYNONYMOUS_CODING	11	16	205	5	X_13749375_SNP	82	1104887	0.00007	9.69087	2	2R_3457962_SNP	2R_3457962_SNP	FBgn0033194	Vps13	0	INTRON	11	12	205		FS
X_15524532_SNP	FBgn0003463	sog	0	INTRON	108	138	205	5	X_15524532_SNP	15996	1351898	0.01183	26.69484	2	2R_1317489_SNP	2R_1317489_SNP	FBgn0259247	laccase2	0	INTRON	46	55	205		FS
X_17207839_SNP	FBgn0004854	B-H2	775	UPSTREAM	45	56	205	5	X_17207839_SNP	20102	1349801	0.01489	29.21299	4	3R_12187882_SNP	3R_12187882_SNP	FBgn0038422	CG14880	0	INTRON	42	51	205		FS
X_17208096_SNP	FBgn0004854	B-H2	518	UPSTREAM	38	50	205	5	X_17208096_SNP	19214	1336981	0.01437	23.82560	1	2L_7762987_SNP	2L_7762987_SNP	FBgn0031944	CG7196	0	INTRON	49	65	205		FS
X_7060779_SNP	FBgn0029939	CG9650	0	INTRON	8	9	205	5	X_7060779_SNP	2	1031868	0.00000	8.66118	2	2R_15488793_SNP	2R_15488793_SNP	FBgn0003435	sm	0	INTRON	9	11	205		FS
X_9063326_SNP	FBgn0026206	mei-P26	0	INTRON	82	109	205	5	X_9063326_SNP	12926	1360931	0.00950	24.28285	3	3L_10069907_SNP	3L_10069907_SNP	FBgn0040823	dpr6	0	INTRON	12	16	205		FS
X_9063484_SNP	FBgn0026206	mei-P26	0	INTRON	93	121	205	5	X_9063484_SNP	11517	1359509	0.00847	28.52787	2	2R_8242026_SNP	2R_8242026_SNP	FBgn0050047	CG30047	0	INTRON	81	106	205		FS
2L_11279606_SNP	FBgn0052831	CG33695	0	UTR_3_PRIME	129	177	205	1	2L_11279606_SNP	2561	1226713	0.00209	14.08740	3	3L_540056_SNP	3L_540056_SNP	FBgn0001316	klar	0	UTR_5_PRIME	8	14	205		ESD
2L_11280190_SNP	FBgn0265071	CR44182	0	EXON	135	185	205	1	2L_11280190_SNP	359	1217390	0.00029	12.97183	1	2L_18872067_SNP	2L_18872067_SNP	FBgn0003896	tup	0	INTRON	13	19	205		ESD
2L_11280405_SNP	FBgn0032358	Ppt2	0	NON_SYNONYMOUS_CODING	117	161	205	1	2L_11280405_SNP	14305	1300560	0.01100	24.17229	1	2L_6455154_SNP	2L_6455154_SNP	FBgn0031814	retm	0	INTRON	35	45	205		ESD
2L_13414855_SNP	FBgn0032523	CG16956	280	UPSTREAM	80	105	205	1	2L_13414855_SNP	15211	1351170	0.01126	30.32579	3	3L_4077346_SNP	3L_4077346_SNP	FBgn0004516	Gad1	0	INTRON	15	20	205		ESD
2L_13414857_SNP	FBgn0032523	CG16956	282	UPSTREAM	77	102	205	1	2L_13414857_SNP	15341	1351979	0.01135	34.94204	3	3L_4077346_SNP	3L_4077346_SNP	FBgn0004516	Gad1	0	INTRON	15	20	205		ESD
2L_22193298_SNP	FBgn0259683	Ir40a	0	INTRON	25	30	205	1	2L_22193298_SNP	16023	1303507	0.01229	23.96311	1	2L_3719155_SNP	2L_3719155_SNP	FBgn0003386	Shaw	0	INTRON	33	41	205		ESD
2L_22199491_SNP	FBgn0259683	Ir40a	0	INTRON	9	11	205	1	2L_22199491_SNP	701	1058722	0.00066	13.49412	5	X_1572484_SNP	X_1572484_SNP	FBgn0023531	CG32809	0	INTRON	11	16	205		ESD
2L_5063853_SNP	FBgn0028572	qtc	0	INTRON	22	32	205	1	2L_5063853_SNP	16706	1245949	0.01341	23.42555	4	3R_9045651_SNP	3R_9045651_SNP	FBgn0038127	CG8476	0	NON_SYNONYMOUS_CODING	96	128	205		ESD
2L_7703725_SNP	FBgn0041181	Tep3	0	INTRON	95	122	205	1	2L_7703725_SNP	6167	1349333	0.00457	19.17456	3	3L_14068671_SNP	3L_14068671_SNP	FBgn0013563	Pex1	0	INTRON	30	36	205		ESD
2L_914246_SNP	FBgn0046113	GluRIIC	0	NON_SYNONYMOUS_CODING	111	145	205	1	2L_914246_SNP	12473	1327133	0.00940	20.90762	4	3R_5076038_SNP	3R_5076038_SNP	FBgn0037664	CG8420	0	INTRON	71	93	205		ESD
2R_11850717_SNP	FBgn0265045	Strn-Mlck	0	INTRON	101	133	205	2	2R_11850717_SNP	13974	1349957	0.01035	25.99917	2	2R_18717216_SNP	2R_18717216_SNP	FBgn0050272	CG30272	4	UPSTREAM	18	21	205		ESD
2R_13339275_SNP	FBgn0028956	mthl3	0	INTRON	13	15	205	2	2R_13339275_SNP	82	1143487	0.00007	10.69176	4	3R_17908276_SNP	3R_17908276_SNP	FBgn0038929	CG13408	0	INTRON	105	132	205		ESD
2R_13752655_SNP	FBgn0003701	thr	0	NON_SYNONYMOUS_CODING	81	113	205	2	2R_13752655_SNP	13965	1360907	0.01026	27.61882	4	3R_16273119_SNP	3R_16273119_SNP	FBgn0262869	mun	0	INTRON	47	61	205		ESD
2R_14554458_SNP	FBgn0023214	edl	568	DOWNSTREAM	15	22	205	2	2R_14554458_SNP	10380	1199029	0.00866	18.12816	4	3R_25961727_SNP	3R_25961727_SNP	FBgn0039747	AdoR	0	NON_SYNONYMOUS_CODING	42	53	205		ESD
2R_14554464_SNP	FBgn0023214	edl	562	DOWNSTREAM	120	151	205	2	2R_14554464_SNP	16822	1302964	0.01291	24.65494	1	2L_2671324_SNP	2L_2671324_SNP	FBgn0041248	Gr23a	0	INTRON	71	95	205		ESD
2R_14955367_SNP	FBgn0004168	5-HT1A	0	INTRON	73	94	205	2	2R_14955367_SNP	14127	1354678	0.01043	32.08165	4	3R_27805902_SNP	3R_27805902_SNP	FBgn0011224	heph	0	INTRON	8	11	205		ESD
2R_14955549_SNP	FBgn0004168	5-HT1A	0	INTRON	89	115	205	2	2R_14955549_SNP	15161	1356184	0.01118	28.74977	1	2L_10799060_SNP	2L_10799060_SNP	FBgn0051869	CG31869	0	INTRON	23	28	205		ESD
2R_14955563_SNP	FBgn0004168	5-HT1A	0	INTRON	89	116	205	2	2R_14955563_SNP	15091	1356624	0.01112	29.27906	1	2L_10799060_SNP	2L_10799060_SNP	FBgn0051869	CG31869	0	INTRON	23	28	205		ESD
2R_16878772_SNP	FBgn0034568	CG3216	96	UPSTREAM	15	20	205	2	2R_16878772_SNP	2176	1199993	0.00181	16.06971	3	3L_13872668_SNP	3L_13872668_SNP	FBgn0036382	CG13737	0	INTRON	17	24	205		ESD
2R_7527574_SNP	FBgn0033638	CG9005	0	INTRON	9	11	205	2	2R_7527574_SNP	14	1069224	0.00001	7.46110	2	2R_18169434_SNP	2R_18169434_SNP	FBgn0020307	dve	0	INTRON	84	114	205		ESD
3L_11547252_SNP	FBgn0259481	Mob2	0	INTRON	45	55	205	3	3L_11547252_SNP	6866	1349803	0.00509	23.17326	5	X_19286400_SNP	X_19286400_SNP	FBgn0031016	kek5	0	INTRON	16	24	205		ESD
3L_12328810_SNP	FBgn0052105	CG32105	0	UTR_3_PRIME	138	186	205	3	3L_12328810_SNP	2045	1193632	0.00171	13.64301	4	3R_19129137_SNP	3R_19129137_SNP	FBgn0003118	pnt	0	INTRON	20	25	205		ESD
3L_12695268_SNP	FBgn0014343	mirr	0	INTRON	8	11	205	3	3L_12695268_SNP	20319	968402	0.02098	17.08370	3	3L_10109268_SNP	3L_10109268_SNP	FBgn0040823	dpr6	0	INTRON	31	39	205		ESD
3L_12700855_SNP	FBgn0014343	mirr	0	INTRON	116	155	205	3	3L_12700855_SNP	15081	1320892	0.01142	24.54161	4	3R_24843955_SNP	3R_24843955_SNP	FBgn0039620	CG1443	0	INTRON	29	38	205		ESD
3L_13892964_SNP	FBgn0264006	dysc	0	INTRON	11	12	205	3	3L_13892964_SNP	4638	1060439	0.00437	14.23070	4	3R_9659783_SNP	3R_9659783_SNP	FBgn0013998	Nsf2	412	DOWNSTREAM	123	160	205		ESD
3L_21958637_SNP	FBgn0029091	CS-2	0	INTRON	24	32	205	3	3L_21958637_SNP	5945	1284299	0.00463	15.88242	3	3L_7227066_SNP	3L_7227066_SNP	FBgn0035750	CG14826	546	UPSTREAM	9	11	205		ESD
3L_2427329_SNP	FBgn0261551	CG42669	0	INTRON	31	40	205	3	3L_2427329_SNP	34165	1314308	0.02599	30.08660	4	3R_16558352_SNP	3R_16558352_SNP	FBgn0051205	CG31205	26	DOWNSTREAM	78	109	205		ESD
3L_2995130_SNP	FBgn0035384	CG2113	42	UPSTREAM	85	118	205	3	3L_2995130_SNP	14242	1360347	0.01047	25.63760	2	2R_20318326_SNP	2R_20318326_SNP	FBgn0035003	CG15873	190	UPSTREAM	38	45	205		ESD
3L_4917049_SNP	FBgn0028699	Rh50	0	INTRON	79	105	205	3	3L_4917049_SNP	15431	1360952	0.01134	28.79297	4	3R_24899201_SNP	3R_24899201_SNP	FBgn0039633	CG11873	0	INTRON	13	19	205		ESD
3L_4917323_SNP	FBgn0028699	Rh50	0	INTRON	76	99	205	3	3L_4917323_SNP	15288	1361216	0.01123	23.28452	4	3R_14739433_SNP	3R_14739433_SNP	FBgn0038660	CG14291	789	UPSTREAM	72	98	205		ESD
3L_7485511_SNP	FBgn0035790	Cyp316a1	0	NON_SYNONYMOUS_CODING	22	29	205	3	3L_7485511_SNP	2698	1281634	0.00211	15.76922	1	2L_19396254_SNP	2L_19396254_SNP	FBgn0032775	CG17544	0	INTRON	53	65	205		ESD
3R_12961295_SNP	FBgn0051267	CG31267	290	DOWNSTREAM	19	25	205	4	3R_12961295_SNP	12730	1239674	0.01027	23.99664	4	3R_27475157_SNP	3R_27475157_SNP	FBgn0039862	kek6	0	INTRON	18	29	205		ESD
3R_15309412_SNP	FBgn0260003	Dys	0	INTRON	12	19	205	4	3R_15309412_SNP	25175	1140781	0.02207	23.29020	1	2L_10073594_SNP	2L_10073594_SNP	FBgn0265002	CG44153	0	INTRON	9	11	205		ESD
3R_4043437_SNP	FBgn0037552	CG7800	242	UPSTREAM	70	97	205	4	3R_4043437_SNP	14632	1358247	0.01077	26.53006	5	X_11130913_SNP	X_11130913_SNP	FBgn0261569	CG42683	0	INTRON	17	19	205		ESD
3R_4153850_SNP	FBgn0003129	Poxm	0	INTRON	30	41	205	4	3R_4153850_SNP	8135	1317740	0.00617	20.66401	5	X_7308042_SNP	X_7308042_SNP	FBgn0261616	CG42705	0	INTRON	17	19	205		ESD
3R_4537507_SNP	FBgn0037612	CG8112	0	INTRON	62	90	205	4	3R_4537507_SNP	16262	1358045	0.01197	34.75427	5	X_8781785_SNP	X_8781785_SNP	FBgn0011661	Moe	0	INTRON	84	115	205		ESD
3R_4538350_SNP	FBgn0037612	CG8112	0	INTRON	39	55	205	4	3R_4538350_SNP	15712	1342319	0.01171	30.65422	1	2L_955974_SNP	2L_955974_SNP	FBgn0028481	CG4341	0	INTRON	12	19	205		ESD
3R_4538400_SNP	FBgn0037612	CG8112	0	INTRON	53	75	205	4	3R_4538400_SNP	14159	1355803	0.01044	23.66651	3	3L_13080563_SNP	3L_13080563_SNP	FBgn0036345	CG17300	174	UPSTREAM	39	50	205		ESD
3R_4550464_SNP	FBgn0037617	CG8145	30	DOWNSTREAM	60	84	205	4	3R_4550464_SNP	14646	1356789	0.01079	28.05191	3	3L_5058625_SNP	3L_5058625_SNP	FBgn0005775	Con	0	INTRON	60	82	205		ESD
3R_4559608_SNP	FBgn0037622	CG8202	0	NON_SYNONYMOUS_CODING	19	28	205	4	3R_4559608_SNP	26380	1257134	0.02098	26.07951	4	3R_24843955_SNP	3R_24843955_SNP	FBgn0039620	CG1443	0	INTRON	29	38	205		ESD
3R_9799395_SNP	FBgn0264493	rdx	0	INTRON	84	116	205	4	3R_9799395_SNP	15921	1357157	0.01173	29.85726	2	2R_8605339_SNP	2R_8605339_SNP	FBgn0261545	CG42663	0	INTRON	26	31	205		ESD
3R_9799511_SNP	FBgn0264493	rdx	0	INTRON	98	129	205	4	3R_9799511_SNP	17484	1345710	0.01299	31.08599	4	3R_16563782_SNP	3R_16563782_SNP	FBgn0038821	CG17267	0	NON_SYNONYMOUS_CODING	44	58	205		ESD
3R_9799594_SNP	FBgn0264493	rdx	0	INTRON	114	146	205	4	3R_9799594_SNP	19994	1332444	0.01501	28.18081	1	2L_10609395_SNP	2L_10609395_SNP	FBgn0051721	Trim9	0	INTRON	38	50	205		ESD
3R_9854781_SNP	FBgn0264493	rdx	0	INTRON	17	27	205	4	3R_9854781_SNP	5071	1209672	0.00419	17.52119	2	2R_12222428_SNP	2R_12222428_SNP	FBgn0262511	Vha44	0	INTRON	54	68	205		ESD
X_15222737_SNP	FBgn0015926	dah	0	INTRON	14	16	205	5	X_15222737_SNP	3870	1175301	0.00329	14.99779	3	3L_10361376_SNP	3L_10361376_SNP	FBgn0265415	CR44327	820	DOWNSTREAM	10	11	205		ESD
X_15222738_SNP	FBgn0015926	dah	0	INTRON	14	16	205	5	X_15222738_SNP	3173	1171116	0.00271	16.72209	3	3L_2696351_SNP	3L_2696351_SNP	FBgn0264606	CG43955	0	INTRON	4	10	205		ESD
X_15224104_SNP	FBgn0015926	dah	0	INTRON	15	16	205	5	X_15224104_SNP	3568	1189597	0.00300	17.27972	3	3L_2696351_SNP	3L_2696351_SNP	FBgn0264606	CG43955	0	INTRON	4	10	205		ESD
X_15241431_SNP	FBgn0030631	CG6227	0	INTRON	13	14	205	5	X_15241431_SNP	5504	1165517	0.00472	14.99779	3	3L_10361376_SNP	3L_10361376_SNP	FBgn0265415	CR44327	820	DOWNSTREAM	10	11	205		ESD
X_15241432_SNP	FBgn0030631	CG6227	0	INTRON	12	13	205	5	X_15241432_SNP	6515	1143870	0.00570	25.46796	3	3L_10361376_SNP	3L_10361376_SNP	FBgn0265415	CR44327	820	DOWNSTREAM	10	11	205		ESD
X_15241453_SNP	FBgn0030631	CG6227	0	INTRON	14	15	205	5	X_15241453_SNP	4676	1182800	0.00395	14.99779	3	3L_10361376_SNP	3L_10361376_SNP	FBgn0265415	CR44327	820	DOWNSTREAM	10	11	205		ESD
X_20789813_SNP	FBgn0085387	shakB	0	INTRON	54	73	205	5	X_20789813_SNP	11040	1356871	0.00814	26.50464	2	2R_3608921_SNP	2R_3608921_SNP	FBgn0042135	CG18812	0	INTRON	23	30	205		ESD
X_22234030_SNP	FBgn0000719	fog	0	INTRON	113	151	205	5	X_22234030_SNP	18889	1339671	0.01410	32.35377	3	3L_2735462_SNP	3L_2735462_SNP	FBgn0052296	Mrtf	0	INTRON	63	83	205		ESD
2L_16504226_SNP	FBgn0032586	Tpr2	0	INTRON	23	28	205	1	2L_16504226_SNP	9802	1279967	0.00766	24.33460	3	3L_12639171_SNP	3L_12639171_SNP	FBgn0052111	CG32111	273	DOWNSTREAM	97	123	205		EDD
2L_16504330_SNP	FBgn0032586	Tpr2	0	INTRON	36	48	205	1	2L_16504330_SNP	9756	1333284	0.00732	23.62866	2	2R_16752213_SNP	2R_16752213_SNP	FBgn0034554	CG15227	0	INTRON	29	37	205		EDD
2L_5910346_SNP	FBgn0043362	bchs	0	INTRON	105	138	205	1	2L_5910346_SNP	21713	1335054	0.01626	31.23530	2	2R_15065294_SNP	2R_15065294_SNP	FBgn0034420	CG10737	430	DOWNSTREAM	84	112	205		EDD
2L_5910809_SNP	FBgn0043362	bchs	0	INTRON	41	50	205	1	2L_5910809_SNP	10734	1346730	0.00797	23.00396	4	3R_2992178_SNP	3R_2992178_SNP	FBgn0002306	sas	0	INTRON	118	149	205		EDD
2L_6458924_SNP	FBgn0031815	frj	0	UTR_3_PRIME	60	73	205	1	2L_6458924_SNP	14232	1359052	0.01047	29.68411	5	X_2780947_SNP	X_2780947_SNP	FBgn0028369	kirre	0	INTRON	27	32	205		EDD
2L_7901123_SNP	FBgn0085450	Snoo	0	INTRON	49	64	205	1	2L_7901123_SNP	13453	1349243	0.00997	29.39309	3	3L_14114981_SNP	3L_14114981_SNP	FBgn0042630	Sox21b	0	INTRON	43	54	205		EDD
2L_9571456_SNP	FBgn0032130	CG3838	0	INTRON	47	66	205	1	2L_9571456_SNP	15572	1351199	0.01152	25.41782	4	3R_4157655_SNP	3R_4157655_SNP	FBgn0003129	Poxm	0	INTRON	25	29	205		EDD
2R_10013626_SNP	FBgn0040752	Prosap	0	INTRON	108	143	205	2	2R_10013626_SNP	13736	1335329	0.01029	23.98205	2	2R_5135091_SNP	2R_5135091_SNP	FBgn0010114	hig	337	UPSTREAM	41	51	205		EDD
2R_10501277_SNP	FBgn0026427	Su(var)2-HP2	0	INTRON	34	49	205	2	2R_10501277_SNP	13524	1327822	0.01019	23.21077	1	2L_6273727_SNP	2L_6273727_SNP	FBgn0053531	Ddr	0	INTRON	28	38	205		EDD
2R_13339275_SNP	FBgn0028956	mthl3	0	INTRON	13	15	205	2	2R_13339275_SNP	20	1143487	0.00002	8.41745	4	3R_19685093_SNP	3R_19685093_SNP	FBgn0004185	snRNA:U1:95Ca	96	DOWNSTREAM	9	11	205		EDD
2R_13664692_SNP	FBgn0250851	CG33981	0	UTR_3_PRIME	76	100	205	2	2R_13664692_SNP	12767	1361429	0.00938	26.03586	4	3R_16817614_SNP	3R_16817614_SNP	FBgn0013995	Calx	0	INTRON	10	11	205		EDD
2R_17361262_SNP	FBgn0010415	Sdc	0	INTRON	12	14	205	2	2R_17361262_SNP	969	1086339	0.00089	13.15039	1	2L_8503992_SNP	2L_8503992_SNP	FBgn0032048	Dh31	0	INTRON	10	13	205		EDD
2R_6527959_SNP	FBgn0033538	CG11883	0	INTRON	29	37	205	2	2R_6527959_SNP	6854	1315311	0.00521	19.18730	4	3R_10900978_SNP	3R_10900978_SNP	FBgn0038282	dpr9	0	INTRON	127	164	205		EDD
2R_6641256_SNP	FBgn0053144	CG33144	0	INTRON	83	107	205	2	2R_6641256_SNP	18122	1361218	0.01331	26.59509	5	X_2574735_SNP	X_2574735_SNP	FBgn0011276	HLH3B	0	NON_SYNONYMOUS_CODING	53	65	205		EDD
3L_10867913_SNP	FBgn0026160	tna	167	DOWNSTREAM	36	50	205	3	3L_10867913_SNP	12779	1337505	0.00955	25.17720	2	2R_7041422_SNP	2R_7041422_SNP	FBgn0033579	CG13229	0	INTRON	34	41	205		EDD
3L_11508282_SNP	FBgn0036168	CG7512	0	INTRON	10	12	205	3	3L_11508282_SNP	2303	1076532	0.00214	14.47072	5	X_9558707_SNP	X_9558707_SNP	FBgn0261617	nej	768	DOWNSTREAM	44	64	205		EDD
3L_12328810_SNP	FBgn0052105	CG32105	0	UTR_3_PRIME	142	186	205	3	3L_12328810_SNP	78	1193636	0.00007	10.76562	1	2L_8913833_SNP	2L_8913833_SNP	FBgn0085427	CG34398	0	INTRON	7	10	205		EDD
3L_17185380_SNP	FBgn0260943	Rbp6	0	INTRON	54	63	205	3	3L_17185380_SNP	11635	1355387	0.00858	21.69111	5	X_17452135_SNP	X_17452135_SNP	FBgn0263706	CG43658	0	INTRON	23	33	205		EDD
3L_17185395_SNP	FBgn0260943	Rbp6	0	INTRON	53	63	205	3	3L_17185395_SNP	11487	1354797	0.00848	22.03864	3	3L_12401878_SNP	3L_12401878_SNP	FBgn0052103	CG32103	0	INTRON	79	102	205		EDD
3L_17933046_SNP	FBgn0262793	CG43174	0	INTRON	8	12	205	3	3L_17933046_SNP	40	1008055	0.00004	8.23924	4	3R_15179483_SNP	3R_15179483_SNP	FBgn0262839	CG43203	290	UPSTREAM	27	33	205		EDD
3L_2708945_SNP	FBgn0264606	CG43955	0	INTRON	30	40	205	3	3L_2708945_SNP	8168	1316164	0.00621	29.01048	1	2L_3744120_SNP	2L_3744120_SNP	FBgn0031568	CG10019	0	INTRON	137	177	205		EDD
3L_2710597_SNP	FBgn0264606	CG43955	0	INTRON	37	51	205	3	3L_2710597_SNP	11142	1336952	0.00833	25.50797	1	2L_3744120_SNP	2L_3744120_SNP	FBgn0031568	CG10019	0	INTRON	137	177	205		EDD
3L_3438403_SNP	FBgn0026259	eIF5B	0	INTRON	98	122	205	3	3L_3438403_SNP	15452	1357455	0.01138	22.84583	4	3R_3618967_SNP	3R_3618967_SNP	FBgn0037517	CG10086	0	UTR_3_PRIME	37	48	205		EDD
3L_4719102_SNP	FBgn0035574	Gef64C	0	INTRON	91	120	205	3	3L_4719102_SNP	17857	1359632	0.01313	25.78173	4	3R_2130859_SNP	3R_2130859_SNP	FBgn0051561	Osi16	110	UPSTREAM	126	167	205		EDD
3L_8159211_SNP	FBgn0035845	CG13675	593	UPSTREAM	10	10	205	3	3L_8159211_SNP	994	1079845	0.00092	12.23945	1	2L_9882207_SNP	2L_9882207_SNP	FBgn0032151	nAcRalpha-30D	0	INTRON	5	10	205		EDD
3L_8159242_SNP	FBgn0035845	CG13675	624	UPSTREAM	10	10	205	3	3L_8159242_SNP	10636	1070668	0.00993	14.91880	3	3L_7781801_SNP	3L_7781801_SNP	FBgn0052369	CG32369	0	INTRON	148	193	205		EDD
3L_8302277_SNP	FBgn0035871	BI-1	236	UPSTREAM	10	12	205	3	3L_8302277_SNP	10	1062400	0.00001	8.40837	4	3R_15626763_SNP	3R_15626763_SNP	FBgn0014135	bnl	0	INTRON	10	15	205		EDD
3L_8859886_SNP	FBgn0263930	dally	0	INTRON	25	31	205	3	3L_8859886_SNP	4849	1299298	0.00373	20.37298	1	2L_3744120_SNP	2L_3744120_SNP	FBgn0031568	CG10019	0	INTRON	137	177	205		EDD
3R_10646290_SNP	FBgn0264754	btsz	0	INTRON	89	118	205	4	3R_10646290_SNP	20243	1355853	0.01493	25.27187	1	2L_2807139_SNP	2L_2807139_SNP	FBgn0031461	daw	0	INTRON	7	12	205		EDD
3R_18262633_SNP	FBgn0038967	CG13847	761	UPSTREAM	38	51	205	4	3R_18262633_SNP	11665	1337070	0.00872	33.09052	2	2R_13702856_SNP	2R_13702856_SNP	FBgn0259211	grh	0	INTRON	47	69	205		EDD
3R_18262745_SNP	FBgn0038967	CG13847	873	UPSTREAM	82	105	205	4	3R_18262745_SNP	11852	1356865	0.00873	22.32594	2	2R_20487376_SNP	2R_20487376_SNP	FBgn0035032	CG4692	32	UPSTREAM	134	173	205		EDD
3R_21504465_SNP	FBgn0039356	CG5039	0	START_GAINED	37	49	205	4	3R_21504465_SNP	18917	1335738	0.01416	28.96271	4	3R_12250698_SNP	3R_12250698_SNP	FBgn0051497	tRNA:CR31497	11	DOWNSTREAM	73	94	205		EDD
3R_22909747_SNP	FBgn0039480	Cpr97Ea	0	NON_SYNONYMOUS_CODING	15	21	205	4	3R_22909747_SNP	450	1207694	0.00037	15.08883	5	X_2581591_SNP	X_2581591_SNP	FBgn0003068	per	0	INTRON	7	10	205		EDD
3R_4153850_SNP	FBgn0003129	Poxm	0	INTRON	33	41	205	4	3R_4153850_SNP	25771	1327422	0.01941	26.94444	3	3L_7426814_SNP	3L_7426814_SNP	FBgn0259935	CG42458	0	INTRON	34	47	205		EDD
3R_4531462_SNP	FBgn0037612	CG8112	0	INTRON	55	75	205	4	3R_4531462_SNP	12966	1356538	0.00956	32.55428	4	3R_25001375_SNP	3R_25001375_SNP	FBgn0039647	CG14509	0	INTRON	66	81	205		EDD
3R_5947278_SNP	FBgn0037789	CG6208	156	UPSTREAM	41	54	205	4	3R_5947278_SNP	11032	1343317	0.00821	22.08335	3	3L_23009702_SNP	3L_23009702_SNP	FBgn0262509	nrm	0	INTRON	26	36	205		EDD
3R_6201449_SNP	FBgn0020379	Rfx	0	INTRON	18	28	205	4	3R_6201449_SNP	2401	1197541	0.00200	18.58037	4	3R_21922483_SNP	3R_21922483_SNP	FBgn0039411	dys	0	INTRON	52	67	205		EDD
3R_9799420_SNP	FBgn0264493	rdx	0	INTRON	85	115	205	4	3R_9799420_SNP	17058	1356726	0.01257	26.21906	4	3R_18274944_SNP	3R_18274944_SNP	FBgn0085405	CG34376	0	INTRON	30	36	205		EDD
3R_9799433_SNP	FBgn0264493	rdx	0	INTRON	69	96	205	4	3R_9799433_SNP	17176	1360257	0.01263	25.22192	1	2L_2348632_SNP	2L_2348632_SNP	FBgn0031414	eys	0	INTRON	31	40	205		EDD
3R_9799511_SNP	FBgn0264493	rdx	0	INTRON	100	129	205	4	3R_9799511_SNP	12729	1348338	0.00944	25.60772	4	3R_19308215_SNP	3R_19308215_SNP	FBgn0051225	Ir94f	0	NON_SYNONYMOUS_CODING	63	84	205		EDD
3R_9799594_SNP	FBgn0264493	rdx	0	INTRON	117	146	205	4	3R_9799594_SNP	5916	1334460	0.00443	21.01536	4	3R_16563782_SNP	3R_16563782_SNP	FBgn0038821	CG17267	0	NON_SYNONYMOUS_CODING	44	58	205		EDD
3R_9854781_SNP	FBgn0264493	rdx	0	INTRON	17	27	205	4	3R_9854781_SNP	616	1209675	0.00051	12.91521	3	3L_22606811_SNP	3L_22606811_SNP	FBgn0037171	CG14459	0	INTRON	7	10	205		EDD
X_15214154_SNP	FBgn0004924	Top1	0	INTRON	21	27	205	5	X_15214154_SNP	2584	1267206	0.00204	14.16236	4	3R_6137046_SNP	3R_6137046_SNP	FBgn0037807	CG6293	0	INTRON	8	12	205		EDD
X_19645981_SNP	FBgn0031069	Pmp70	0	INTRON	58	71	205	5	X_19645981_SNP	18790	1359115	0.01383	27.24868	3	3L_16289232_SNP	3L_16289232_SNP	FBgn0036597	CG4962	585	UPSTREAM	96	123	205		EDD
X_19646015_SNP	FBgn0031069	Pmp70	0	INTRON	50	64	205	5	X_19646015_SNP	22520	1354399	0.01663	26.47812	1	2L_9143557_SNP	2L_9143557_SNP	FBgn0052982	CG32982	0	INTRON	40	48	205		EDD
X_22233916_SNP	FBgn0000719	fog	0	INTRON	112	144	205	5	X_22233916_SNP	10085	1344056	0.00750	21.48131	3	3L_22329387_SNP	3L_22329387_SNP	FBgn0004449	Ten-m	0	INTRON	132	167	205		EDD
X_2769163_SNP	FBgn0028369	kirre	0	INTRON	45	61	205	5	X_2769163_SNP	14890	1350785	0.01102	29.12536	5	X_17387213_SNP	X_17387213_SNP	FBgn0263706	CG43658	0	INTRON	32	40	205		EDD
X_3607392_SNP	FBgn0015286	Rala	0	INTRON	17	23	205	5	X_3607392_SNP	5180	1231219	0.00421	18.87330	1	2L_16787708_SNP	2L_16787708_SNP	FBgn0264695	Mhc	0	INTRON	8	12	205		EDD
X_3613994_SNP	FBgn0086899	tlk	46	UPSTREAM	21	25	205	5	X_3613994_SNP	3112	1268736	0.00245	13.89117	5	X_15819726_SNP	X_15819726_SNP	FBgn0010240	Lcch3	0	INTRON	6	11	205		EDD
X_3614191_SNP	FBgn0086899	tlk	0	INTRON	20	24	205	5	X_3614191_SNP	4631	1253144	0.00370	14.51817	4	3R_24951516_SNP	3R_24951516_SNP	FBgn0039637	CG11880	0	INTRON	122	157	205		EDD
X_3729381_SNP	FBgn0000542	ec	0	INTRON	30	41	205	5	X_3729381_SNP	10365	1313144	0.00789	23.19128	2	2R_10820304_SNP	2R_10820304_SNP	FBgn0033983	CG10253	0	INTRON	53	67	205		EDD
X_5226493_SNP	FBgn0026751	XRCC1	25	DOWNSTREAM	56	77	205	5	X_5226493_SNP	18614	1355155	0.01374	24.35620	4	3R_13928300_SNP	3R_13928300_SNP	FBgn0003499	sr	0	INTRON	94	127	205		EDD
2L_12190653_SNP	FBgn0000114	aret	0	INTRON	28	35	205	1	2L_12190653_SNP	1380	1305912	0.00106	15.08291	2	2R_9980917_SNP	2R_9980917_SNP	FBgn0040752	Prosap	0	INTRON	27	35	205		DI
2L_12190660_SNP	FBgn0000114	aret	0	INTRON	31	38	205	1	2L_12190660_SNP	1682	1315268	0.00128	16.46971	2	2R_9980917_SNP	2R_9980917_SNP	FBgn0040752	Prosap	0	INTRON	27	35	205		DI
2L_12190664_SNP	FBgn0000114	aret	0	INTRON	32	39	205	1	2L_12190664_SNP	3651	1318911	0.00277	19.06298	4	3R_15822395_SNP	3R_15822395_SNP	FBgn0038755	Hs6st	0	INTRON	25	33	205		DI
2L_12190669_SNP	FBgn0000114	aret	0	INTRON	30	37	205	1	2L_12190669_SNP	3819	1311280	0.00291	19.28163	4	3R_15822395_SNP	3R_15822395_SNP	FBgn0038755	Hs6st	0	INTRON	25	33	205		DI
2L_12190670_SNP	FBgn0000114	aret	0	INTRON	32	39	205	1	2L_12190670_SNP	3589	1318919	0.00272	19.99909	4	3R_15822395_SNP	3R_15822395_SNP	FBgn0038755	Hs6st	0	INTRON	25	33	205		DI
2L_14222249_SNP	FBgn0016930	smi35A	0	INTRON	47	59	205	1	2L_14222249_SNP	6723	1349908	0.00498	19.73234	5	X_9932575_SNP	X_9932575_SNP	FBgn0263132	Cht6	0	INTRON	18	19	205		DI
2L_16625000_SNP	FBgn0259735	CG42389	0	INTRON	21	32	205	1	2L_16625000_SNP	3710	1268402	0.00292	15.65146	5	X_12401367_SNP	X_12401367_SNP	FBgn0030396	CG2556	0	INTRON	57	70	205		DI
2L_19694078_SNP	FBgn0000464	Lar	0	INTRON	18	25	205	1	2L_19694078_SNP	25454	1251413	0.02034	27.73227	3	3L_9640276_SNP	3L_9640276_SNP	FBgn0053696	CG33696	0	INTRON	101	131	205		DI
2L_22124530_SNP	FBgn0032974	CG3651	0	INTRON	36	45	205	1	2L_22124530_SNP	14003	1335265	0.01049	25.01983	1	2L_2110242_SNP	2L_2110242_SNP	FBgn0053516	dpr3	364	UPSTREAM	13	15	205		DI
2L_22130022_SNP	FBgn0025674	CycK	0	INTRON	50	60	205	1	2L_22130022_SNP	17131	1353943	0.01265	32.88998	1	2L_16871780_SNP	2L_16871780_SNP	FBgn0051781	CR31781	0	INTRON	23	29	205		DI
2L_22130620_SNP	FBgn0262885	CR43240	406	DOWNSTREAM	40	48	205	1	2L_22130620_SNP	12102	1342371	0.00902	24.00277	1	2L_7122819_SNP	2L_7122819_SNP	FBgn0085407	Pvf3	0	INTRON	35	50	205		DI
2L_22130717_SNP	FBgn0262885	CR43240	309	DOWNSTREAM	53	63	205	1	2L_22130717_SNP	15118	1355783	0.01115	32.63362	5	X_6514049_SNP	X_6514049_SNP	FBgn0029881	pigs	0	INTRON	22	28	205		DI
2L_22130776_SNP	FBgn0262885	CR43240	250	DOWNSTREAM	45	54	205	1	2L_22130776_SNP	13256	1349213	0.00982	33.61192	3	3L_4670036_SNP	3L_4670036_SNP	FBgn0262870	axo	0	INTRON	75	87	205		DI
2L_22131583_SNP	FBgn0261802	CG42748	0	UTR_5_PRIME	53	63	205	1	2L_22131583_SNP	15754	1355928	0.01162	34.84804	1	2L_16871780_SNP	2L_16871780_SNP	FBgn0051781	CR31781	0	INTRON	23	29	205		DI
2L_22132871_SNP	FBgn0261802	CG42748	0	INTRON	44	52	205	1	2L_22132871_SNP	13947	1348524	0.01034	25.01319	5	X_604704_SNP	X_604704_SNP	FBgn0021764	sdk	0	INTRON	32	39	205		DI
2L_22133171_SNP	FBgn0261802	CG42748	0	INTRON	45	53	205	1	2L_22133171_SNP	14007	1349373	0.01038	22.67989	5	X_604704_SNP	X_604704_SNP	FBgn0021764	sdk	0	INTRON	32	39	205		DI
2L_5641693_SNP	FBgn0051646	CG31646	0	INTRON	116	150	205	1	2L_5641693_SNP	8920	1327717	0.00672	22.72209	2	2R_6380330_SNP	2R_6380330_SNP	FBgn0005630	lola	0	INTRON	118	147	205		DI
2L_8355912_SNP	FBgn0032026	CG7627	0	UTR_3_PRIME	15	18	205	1	2L_8355912_SNP	3114	1182812	0.00263	14.21853	5	X_6132696_SNP	X_6132696_SNP	FBgn0029851	CG14445	0	INTRON	11	11	205		DI
2L_8364685_SNP	FBgn0010265	RpS13	76	UPSTREAM	10	13	205	1	2L_8364685_SNP	1402	1051015	0.00133	12.62725	1	2L_5215284_SNP	2L_5215284_SNP	FBgn0250847	CG14034	0	STOP_LOST	9	12	205		DI
2R_10814415_SNP	FBgn0027596	CG10249	0	INTRON	105	144	205	2	2R_10814415_SNP	17718	1350175	0.01312	29.54874	4	3R_10516073_SNP	3R_10516073_SNP	FBgn0265140	Meltrin	0	INTRON	34	42	205		DI
2R_16547473_SNP	FBgn0034540	Lrt	0	NON_SYNONYMOUS_CODING	61	78	205	2	2R_16547473_SNP	19008	1359864	0.01398	31.36740	5	X_12111468_SNP	X_12111468_SNP	FBgn0259240	Ten-a	0	INTRON	12	14	205		DI
2R_1738786_SNP	FBgn0085414	dpr12	0	INTRON	11	13	205	2	2R_1738786_SNP	3489	1109478	0.00314	14.87423	2	2R_2856804_SNP	2R_2856804_SNP	FBgn0066292	CheB42c	0	INTRON	46	56	205		DI
2R_17559522_SNP	FBgn0034651	CG15676	0	NON_SYNONYMOUS_CODING	8	12	205	2	2R_17559522_SNP	21349	993552	0.02149	15.62737	4	3R_26038443_SNP	3R_26038443_SNP	FBgn0000277	CecA2	153	DOWNSTREAM	16	20	205		DI
2R_17559527_SNP	FBgn0034651	CG15676	0	NON_SYNONYMOUS_CODING	9	13	205	2	2R_17559527_SNP	18101	1033519	0.01751	15.62737	4	3R_26038443_SNP	3R_26038443_SNP	FBgn0000277	CecA2	153	DOWNSTREAM	16	20	205		DI
2R_19841629_SNP	FBgn0034939	thoc5	0	UTR_5_PRIME	16	19	205	2	2R_19841629_SNP	972	1212585	0.00080	15.13495	3	3L_16454189_SNP	3L_16454189_SNP	FBgn0053158	CG33158	0	INTRON	72	88	205		DI
2R_19841683_SNP	FBgn0034939	thoc5	0	UTR_5_PRIME	17	18	205	2	2R_19841683_SNP	5728	1230664	0.00465	17.98854	3	3L_12047205_SNP	3L_12047205_SNP	FBgn0041096	rols	0	INTRON	9	10	205		DI
2R_2959324_SNP	FBgn0050299	tRNA:CR30299	986	UPSTREAM	37	50	205	2	2R_2959324_SNP	10269	1339289	0.00767	24.32798	2	2R_8550219_SNP	2R_8550219_SNP	FBgn0261673	nemy	0	INTRON	109	144	205		DI
2R_3269620_SNP	FBgn0000352	cos	61	DOWNSTREAM	25	37	205	2	2R_3269620_SNP	26365	1287311	0.02048	35.16699	3	3L_2123154_SNP	3L_2123154_SNP	FBgn0052311	zormin	0	INTRON	101	131	205		DI
3L_10807909_SNP	FBgn0262020	CG42831	10	UPSTREAM	106	139	205	3	3L_10807909_SNP	8215	1350200	0.00608	21.32629	1	2L_19430305_SNP	2L_19430305_SNP	FBgn0032780	CG13085	35	DOWNSTREAM	78	97	205		DI
3L_16487772_SNP	FBgn0263131	CG43373	0	INTRON	9	15	205	3	3L_16487772_SNP	15	1060770	0.00001	9.96056	5	X_17947930_SNP	X_17947930_SNP	FBgn0003380	Sh	0	INTRON	10	15	205		DI
3L_7143915_SNP	FBgn0259173	corn	0	INTRON	19	25	205	3	3L_7143915_SNP	9508	1252545	0.00759	21.77269	1	2L_10105019_SNP	2L_10105019_SNP	FBgn0265002	CG44153	0	INTRON	10	12	205		DI
3L_7143920_SNP	FBgn0259173	corn	0	INTRON	19	24	205	3	3L_7143920_SNP	11293	1252542	0.00902	22.80661	1	2L_10105019_SNP	2L_10105019_SNP	FBgn0265002	CG44153	0	INTRON	10	12	205		DI
3L_8898332_SNP	FBgn0035934	TrpA1	442	UPSTREAM	8	8	205	3	3L_8898332_SNP	14	1041349	0.00001	7.65930	4	3R_14106047_SNP	3R_14106047_SNP	FBgn0026250	eIF-1A	0	INTRON	29	36	205		DI
3L_9173690_SNP	FBgn0004244	Rdl	0	INTRON	47	62	205	3	3L_9173690_SNP	10085	1352241	0.00746	31.53094	1	2L_15925050_SNP	2L_15925050_SNP	FBgn0028645	beat-Ib	0	INTRON	10	14	205		DI
3R_10116797_SNP	FBgn0038220	CG12207	0	INTRON	24	34	205	4	3R_10116797_SNP	13414	1281389	0.01047	22.94745	5	X_12835494_SNP	X_12835494_SNP	FBgn0086675	fne	0	INTRON	73	91	205		DI
3R_17357063_SNP	FBgn0263130	CR43372	0	EXON	23	32	205	4	3R_17357063_SNP	25247	1284724	0.01965	29.89783	3	3L_16512939_SNP	3L_16512939_SNP	FBgn0263131	CG43373	0	INTRON	58	68	205		DI
3R_17842029_SNP	FBgn0038922	CG6439	84	DOWNSTREAM	59	71	205	4	3R_17842029_SNP	25975	1355681	0.01916	30.65953	4	3R_9990842_SNP	3R_9990842_SNP	FBgn0011582	DopR	259	DOWNSTREAM	89	118	205		DI
3R_25686042_SNP	FBgn0039712	CG15514	0	UTR_3_PRIME	12	16	205	4	3R_25686042_SNP	32	1144951	0.00003	9.39565	4	3R_22177974_SNP	3R_22177974_SNP	FBgn0053970	CG33970	0	INTRON	11	11	205		DI
3R_3017082_SNP	FBgn0086372	lap	0	INTRON	137	177	205	4	3R_3017082_SNP	1323	1154498	0.00115	16.89671	1	2L_12301196_SNP	2L_12301196_SNP	FBgn0000114	aret	0	INTRON	64	79	205		DI
3R_3151448_SNP	FBgn0265423	CG44335	0	UTR_5_PRIME	132	165	205	4	3R_3151448_SNP	3920	1182536	0.00331	18.32580	3	3L_2422499_SNP	3L_2422499_SNP	FBgn0261551	CG42669	0	INTRON	33	43	205		DI
3R_6186975_SNP	FBgn0015396	jumu	0	UTR_3_PRIME	90	116	205	4	3R_6186975_SNP	14767	1354754	0.01090	21.15278	3	3L_11995438_SNP	3L_11995438_SNP	FBgn0036239	Pop2	0	INTRON	21	32	205		DI
X_11076658_SNP	FBgn0030278	CG15200	306	UPSTREAM	15	17	205	5	X_11076658_SNP	3978	1165613	0.00341	15.15499	2	2R_15549851_SNP	2R_15549851_SNP	FBgn0034464	CG11018	90	UPSTREAM	78	98	205		DI
X_11076679_SNP	FBgn0030278	CG15200	285	UPSTREAM	88	111	205	5	X_11076679_SNP	45059	1360383	0.03312	36.51027	1	2L_11841696_SNP	2L_11841696_SNP	FBgn0264815	Pde1c	0	INTRON	28	36	205		DI
X_11076749_SNP	FBgn0030278	CG15200	215	UPSTREAM	83	104	205	5	X_11076749_SNP	37579	1361154	0.02761	32.85788	1	2L_10296600_SNP	2L_10296600_SNP	FBgn0032210	CYLD	0	INTRON	18	21	205		DI
X_19076168_SNP	FBgn0030991	CG7453	111	DOWNSTREAM	81	107	205	5	X_19076168_SNP	12192	1358841	0.00897	35.25863	5	X_12768325_SNP	X_12768325_SNP	FBgn0259171	Pde9	0	INTRON	95	125	205		DI
X_19113826_SNP	FBgn0031001	CG7884	829	UPSTREAM	20	27	205	5	X_19113826_SNP	11033	1251424	0.00882	25.74963	2	2R_17269996_SNP	2R_17269996_SNP	FBgn0034626	CG10795	736	DOWNSTREAM	49	58	205		DI
X_20323130_SNP	FBgn0052506	CG32506	0	INTRON	88	117	205	5	X_20323130_SNP	19639	1361366	0.01443	28.36155	2	2R_8615921_SNP	2R_8615921_SNP	FBgn0261545	CG42663	0	INTRON	49	64	205		DI
X_20323144_SNP	FBgn0052506	CG32506	0	INTRON	85	112	205	5	X_20323144_SNP	23208	1361395	0.01705	23.95753	3	3L_14861332_SNP	3L_14861332_SNP	FBgn0036454	CG17839	527	DOWNSTREAM	26	28	205		DI
X_20323165_SNP	FBgn0052506	CG32506	0	INTRON	86	113	205	5	X_20323165_SNP	23926	1361494	0.01757	24.08867	4	3R_25143244_SNP	3R_25143244_SNP	FBgn0015622	Cnx99A	0	INTRON	10	12	205		DI
X_20369946_SNP	FBgn0031118	RhoGAP19D	0	INTRON	11	14	205	5	X_20369946_SNP	948	1095849	0.00087	12.89090	3	3L_3027466_SNP	3L_3027466_SNP	FBgn0004372	aly	945	UPSTREAM	70	93	205		DI
X_20420863_SNP	FBgn0259162	RunxB	0	INTRON	15	21	205	5	X_20420863_SNP	17888	1187843	0.01506	21.48405	2	2R_9489105_SNP	2R_9489105_SNP	FBgn0262360	CG43058	588	UPSTREAM	16	25	205		DI
X_20420870_SNP	FBgn0259162	RunxB	0	INTRON	15	22	205	5	X_20420870_SNP	17888	1187843	0.01506	21.48405	2	2R_9489105_SNP	2R_9489105_SNP	FBgn0262360	CG43058	588	UPSTREAM	16	25	205		DI
X_20420879_SNP	FBgn0259162	RunxB	0	INTRON	14	21	205	5	X_20420879_SNP	18641	1168834	0.01595	21.48405	2	2R_9489105_SNP	2R_9489105_SNP	FBgn0262360	CG43058	588	UPSTREAM	16	25	205		DI
X_20430870_SNP	FBgn0259162	RunxB	0	INTRON	6	9	205	5	X_20430870_SNP	105	883774	0.00012	10.74988	3	3L_23589950_SNP	3L_23589950_SNP	FBgn0250816	AGO3	0	INTRON	26	32	205		DI
X_6485901_SNP	FBgn0029878	Pat1	0	INTRON	76	101	205	5	X_6485901_SNP	14832	1361667	0.01089	29.42484	2	2R_13432723_SNP	2R_13432723_SNP	FBgn0028382	cyp33	2	UPSTREAM	25	36	205		DI
2L_13724029_SNP	FBgn0028847	CG9014	387	UPSTREAM	9	9	205	1	2L_13724029_SNP	15	1045324	0.00001	8.93766	3	3L_2628038_SNP	3L_2628038_SNP	FBgn0011828	Pxn	0	INTRON	7	10	205		SI
2L_2166489_SNP	FBgn0000097	aop	0	INTRON	20	25	205	1	2L_2166489_SNP	44181	1246234	0.03545	27.68483	2	2R_4841314_SNP	2R_4841314_SNP	FBgn0011300	babo	0	INTRON	9	10	205		SI
2L_3894049_SNP	FBgn0000256	capu	0	INTRON	16	19	205	1	2L_3894049_SNP	2476	1196898	0.00207	17.66677	1	2L_12494207_SNP	2L_12494207_SNP	FBgn0259176	bun	0	INTRON	9	11	205		SI
2L_4521383_SNP	FBgn0053196	dp	0	INTRON	96	120	205	1	2L_4521383_SNP	23819	1347268	0.01768	34.68190	2	2R_9127451_SNP	2R_9127451_SNP	FBgn0033817	GstE14	0	INTRON	28	33	205		SI
2L_6263534_SNP	FBgn0053531	Ddr	0	INTRON	42	55	205	1	2L_6263534_SNP	7662	1346334	0.00569	19.05930	1	2L_10154649_SNP	2L_10154649_SNP	FBgn0265002	CG44153	0	INTRON	9	17	205		SI
2L_7156389_SNP	FBgn0085407	Pvf3	0	NON_SYNONYMOUS_CODING	32	40	205	1	2L_7156389_SNP	7702	1322015	0.00583	19.98340	3	3L_7282937_SNP	3L_7282937_SNP	FBgn0035756	unc-13-4A	0	INTRON	25	34	205		SI
2R_12387530_SNP	FBgn0011260	Sema-2a	171	UPSTREAM	14	15	205	2	2R_12387530_SNP	5009	1122634	0.00446	16.14816	5	X_10010361_SNP	X_10010361_SNP	FBgn0083940	CG34104	0	INTRON	58	67	205		SI
2R_13390703_SNP	FBgn0262720	CG43164	0	INTRON	45	52	205	2	2R_13390703_SNP	15148	1348528	0.01123	26.72457	1	2L_18545199_SNP	2L_18545199_SNP	FBgn0085370	Pde11	0	INTRON	30	34	205		SI
2R_13390790_SNP	FBgn0262720	CG43164	0	INTRON	53	65	205	2	2R_13390790_SNP	10196	1355698	0.00752	23.10607	3	3L_12133735_SNP	3L_12133735_SNP	FBgn0036257	RhoGAP68F	0	INTRON	102	131	205		SI
2R_5814173_SNP	FBgn0011656	Mef2	0	INTRON	27	31	205	2	2R_5814173_SNP	3749	1296977	0.00289	18.26169	3	3L_11116220_SNP	3L_11116220_SNP	FBgn0036136	Ufd1-like	0	UTR_5_PRIME	53	65	205		SI
2R_7899173_SNP	FBgn0004839	otk	0	INTRON	97	120	205	2	2R_7899173_SNP	13388	1359619	0.00985	24.70420	1	2L_3764381_SNP	2L_3764381_SNP	FBgn0263846	CG43707	0	NON_SYNONYMOUS_CODING	111	137	205		SI
2R_7931533_SNP	FBgn0024732	Drep-1	584	UPSTREAM	49	62	205	2	2R_7931533_SNP	21856	1353149	0.01615	29.93738	1	2L_3174853_SNP	2L_3174853_SNP	FBgn0085422	CG34393	259	DOWNSTREAM	107	133	205		SI
2R_7931534_SNP	FBgn0024732	Drep-1	583	UPSTREAM	49	60	205	2	2R_7931534_SNP	22189	1353154	0.01640	29.93738	1	2L_3174853_SNP	2L_3174853_SNP	FBgn0085422	CG34393	259	DOWNSTREAM	107	133	205		SI
2R_7935363_SNP	FBgn0024732	Drep-1	0	INTRON	55	71	205	2	2R_7935363_SNP	23543	1357209	0.01735	30.26225	3	3L_2396040_SNP	3L_2396040_SNP	FBgn0035338	CG13800	0	INTRON	11	12	205		SI
2R_7935448_SNP	FBgn0024732	Drep-1	0	INTRON	64	80	205	2	2R_7935448_SNP	18191	1359998	0.01338	28.79181	3	3L_17104665_SNP	3L_17104665_SNP	FBgn0260943	Rbp6	0	INTRON	83	98	205		SI
2R_7937937_SNP	FBgn0024732	Drep-1	260	DOWNSTREAM	66	82	205	2	2R_7937937_SNP	19948	1360670	0.01466	27.37096	1	2L_1289198_SNP	2L_1289198_SNP	FBgn0041097	robo3	0	INTRON	25	31	205		SI
2R_7938579_SNP	FBgn0050039	CG30039	0	UTR_3_PRIME	50	63	205	2	2R_7938579_SNP	22650	1353425	0.01674	28.43583	2	2R_13772127_SNP	2R_13772127_SNP	FBgn0011589	elk	0	INTRON	15	21	205		SI
2R_7939269_SNP	FBgn0050039	CG30039	9	UPSTREAM	55	70	205	2	2R_7939269_SNP	26374	1357419	0.01943	33.07555	3	3L_2396040_SNP	3L_2396040_SNP	FBgn0035338	CG13800	0	INTRON	11	12	205		SI
2R_7939276_SNP	FBgn0050039	CG30039	16	UPSTREAM	55	70	205	2	2R_7939276_SNP	27051	1357314	0.01993	32.89967	3	3L_2396040_SNP	3L_2396040_SNP	FBgn0035338	CG13800	0	INTRON	11	12	205		SI
2R_7939311_SNP	FBgn0050039	CG30039	51	UPSTREAM	32	38	205	2	2R_7939311_SNP	28597	1325409	0.02158	26.46696	1	2L_10546602_SNP	2L_10546602_SNP	FBgn0051721	Trim9	0	INTRON	76	94	205		SI
2R_7939468_SNP	FBgn0050039	CG30039	208	UPSTREAM	42	53	205	2	2R_7939468_SNP	35310	1346616	0.02622	39.40511	3	3L_4755765_SNP	3L_4755765_SNP	FBgn0264473	CR43881	0	EXON	45	54	205		SI
2R_7939816_SNP	FBgn0050039	CG30039	556	UPSTREAM	66	81	205	2	2R_7939816_SNP	18273	1360642	0.01343	33.45339	3	3L_4755765_SNP	3L_4755765_SNP	FBgn0264473	CR43881	0	EXON	45	54	205		SI
2R_7941989_SNP	FBgn0265373	CG44314	0	INTRON	48	62	205	2	2R_7941989_SNP	31840	1351871	0.02355	37.58211	2	2R_17161204_SNP	2R_17161204_SNP	FBgn0085426	Rgk3	0	INTRON	97	115	205		SI
2R_7944643_SNP	FBgn0028407	Drep-3	0	INTRON	47	58	205	2	2R_7944643_SNP	31523	1350782	0.02334	27.91927	3	3L_2401257_SNP	3L_2401257_SNP	FBgn0035338	CG13800	0	INTRON	144	181	205		SI
2R_7982297_SNP	FBgn0086677	jeb	0	INTRON	82	110	205	2	2R_7982297_SNP	13099	1361104	0.00962	24.00344	3	3L_12843440_SNP	3L_12843440_SNP	FBgn0036318	Wbp2	0	INTRON	49	57	205		SI
3L_10856010_SNP	FBgn0026160	tna	0	INTRON	132	164	205	3	3L_10856010_SNP	21694	1303433	0.01664	27.10374	3	3L_18092675_SNP	3L_18092675_SNP	FBgn0036773	CG13698	0	INTRON	51	66	205		SI
3L_10856061_SNP	FBgn0026160	tna	0	INTRON	122	150	205	3	3L_10856061_SNP	20981	1342560	0.01563	24.51846	1	2L_3104151_SNP	2L_3104151_SNP	FBgn0015600	toc	0	INTRON	18	23	205		SI
3L_10856090_SNP	FBgn0026160	tna	0	INTRON	125	155	205	3	3L_10856090_SNP	19811	1339441	0.01479	23.50478	3	3L_12636052_SNP	3L_12636052_SNP	FBgn0052111	CG32111	0	INTRON	37	43	205		SI
3L_10856100_SNP	FBgn0026160	tna	0	INTRON	131	163	205	3	3L_10856100_SNP	20658	1318443	0.01567	23.93049	4	3R_9047217_SNP	3R_9047217_SNP	FBgn0038127	CG8476	917	UPSTREAM	33	47	205		SI
3L_10893212_SNP	FBgn0036111	Aps	989	UPSTREAM	85	99	205	3	3L_10893212_SNP	15369	1362059	0.01128	23.07635	2	2R_13679976_SNP	2R_13679976_SNP	FBgn0028744	CG5033	23	DOWNSTREAM	12	16	205		SI
3L_15905376_SNP	FBgn0036544	sff	0	INTRON	44	52	205	3	3L_15905376_SNP	23519	1345838	0.01748	30.90055	5	X_12577997_SNP	X_12577997_SNP	FBgn0263865	Smr	239	DOWNSTREAM	25	31	205		SI
3L_1652965_SNP	FBgn0035252	CG7970	40	UPSTREAM	19	23	205	3	3L_1652965_SNP	32001	1226554	0.02609	23.45320	1	2L_3919944_SNP	2L_3919944_SNP	FBgn0051774	fred	0	INTRON	34	43	205		SI
3L_18654105_SNP	FBgn0036801	MYPT-75D	0	INTRON	71	89	205	3	3L_18654105_SNP	19285	1361447	0.01417	25.88241	2	2R_10436345_SNP	2R_10436345_SNP	FBgn0020245	ttv	0	INTRON	44	60	205		SI
3L_22167574_SNP	FBgn0037153	olf413	0	INTRON	74	93	205	3	3L_22167574_SNP	15802	1360129	0.01162	37.03343	2	2R_127410_SNP	2R_127410_SNP	FBgn0262117	IntS3	0	INTRON	21	23	205		SI
3L_22283409_SNP	FBgn0027086	Aats-ile	0	INTRON	11	14	205	3	3L_22283409_SNP	9774	1109195	0.00881	16.43041	2	2R_12653773_SNP	2R_12653773_SNP	FBgn0034155	unc-104	0	INTRON	7	10	205		SI
3L_5256654_SNP	FBgn0052423	shep	0	INTRON	8	11	205	3	3L_5256654_SNP	4	1018026	0.00000	7.74734	2	2R_17432695_SNP	2R_17432695_SNP	FBgn0003731	Egfr	0	INTRON	154	190	205		SI
3L_5256671_SNP	FBgn0052423	shep	0	INTRON	8	12	205	3	3L_5256671_SNP	3	1018026	0.00000	7.64168	4	3R_3816183_SNP	3R_3816183_SNP	FBgn0037534	CG2781	0	INTRON	7	10	205		SI
3L_5601272_SNP	FBgn0035624	Eaf6	0	NON_SYNONYMOUS_CODING	17	21	205	3	3L_5601272_SNP	10420	1214707	0.00858	16.38804	1	2L_6129077_SNP	2L_6129077_SNP	FBgn0261683	CG42730	0	UTR_3_PRIME	7	10	205		SI
3L_8142629_SNP	FBgn0035844	CG13676	0	INTRON	63	76	205	3	3L_8142629_SNP	15895	1360050	0.01169	26.37157	5	X_10317171_SNP	X_10317171_SNP	FBgn0052683	CG32683	0	INTRON	109	135	205		SI
3L_8142646_SNP	FBgn0035844	CG13676	0	INTRON	66	82	205	3	3L_8142646_SNP	12591	1361131	0.00925	24.58014	4	3R_18011042_SNP	3R_18011042_SNP	FBgn0051163	SKIP	0	INTRON	26	28	205		SI
3L_9260043_SNP	FBgn0264000	GluRIB	0	INTRON	10	13	205	3	3L_9260043_SNP	23995	1073889	0.02234	17.58293	4	3R_14517767_SNP	3R_14517767_SNP	FBgn0038642	Muc91C	0	INTRON	18	21	205		SI
3L_9276897_SNP	FBgn0264000	GluRIB	0	INTRON	14	17	205	3	3L_9276897_SNP	13724	1159916	0.01183	18.80129	5	X_12577932_SNP	X_12577932_SNP	FBgn0263865	Smr	304	DOWNSTREAM	25	31	205		SI
3R_4452759_SNP	FBgn0261929	CG42796	0	NON_SYNONYMOUS_CODING	15	23	205	4	3R_4452759_SNP	5706	1200503	0.00475	15.12333	1	2L_4469637_SNP	2L_4469637_SNP	FBgn0011603	ine	0	INTRON	28	36	205		SI
3R_5434177_SNP	FBgn0037720	CG8312	0	INTRON	47	56	205	4	3R_5434177_SNP	12135	1349468	0.00899	22.87108	2	2R_16464539_SNP	2R_16464539_SNP	FBgn0028622	qsm	0	INTRON	42	54	205		SI
3R_6939644_SNP	FBgn0037860	CG6629	749	DOWNSTREAM	33	48	205	4	3R_6939644_SNP	32674	1332060	0.02453	41.03932	3	3L_887874_SNP	3L_887874_SNP	FBgn0052479	CG32479	0	INTRON	54	67	205		SI
3R_7184420_SNP	FBgn0004595	pros	0	INTRON	11	14	205	4	3R_7184420_SNP	10280	1081908	0.00950	16.76745	2	2R_17395496_SNP	2R_17395496_SNP	FBgn0043070	MESK2	0	INTRON	9	10	205		SI
X_13814753_SNP	FBgn0264981	mamo	0	INTRON	19	25	205	5	X_13814753_SNP	11280	1255022	0.00899	18.41805	3	3L_22885117_SNP	3L_22885117_SNP	FBgn0037203	slif	0	NON_SYNONYMOUS_CODING	37	50	205		SI
X_6702714_SNP	FBgn0029903	pod1	0	INTRON	125	156	205	5	X_6702714_SNP	5891	1334890	0.00441	18.54939	5	X_17834374_SNP	X_17834374_SNP	FBgn0003380	Sh	0	INTRON	41	56	205		SI
2L_10647760_SNP	FBgn0265264	CG17097	0	NON_SYNONYMOUS_CODING	61	76	205	1	2L_10647760_SNP	21736	1355985	0.01603	30.10370	5	X_16817555_SNP	X_16817555_SNP	FBgn0027556	CG4928	0	INTRON	46	60	205		HP
2L_13988457_SNP	FBgn0003255	rk	0	INTRON	10	12	205	1	2L_13988457_SNP	7862	1079807	0.00728	17.51665	4	3R_26121371_SNP	3R_26121371_SNP	FBgn0010113	hdc	0	INTRON	36	45	205		HP
2L_13988632_SNP	FBgn0003255	rk	0	INTRON	10	12	205	1	2L_13988632_SNP	8824	1079807	0.00817	16.44524	4	3R_26121371_SNP	3R_26121371_SNP	FBgn0010113	hdc	0	INTRON	36	45	205		HP
2L_22130022_SNP	FBgn0025674	CycK	0	INTRON	52	60	205	1	2L_22130022_SNP	15567	1354870	0.01149	32.51983	4	3R_19921471_SNP	3R_19921471_SNP	FBgn0053100	4EHP	0	INTRON	50	61	205		HP
2L_22130118_SNP	FBgn0025674	CycK	0	UTR_5_PRIME	57	64	205	1	2L_22130118_SNP	14442	1357425	0.01064	31.46308	4	3R_19921471_SNP	3R_19921471_SNP	FBgn0053100	4EHP	0	INTRON	50	61	205		HP
2L_22130265_SNP	FBgn0025674	CycK	123	UPSTREAM	59	66	205	1	2L_22130265_SNP	14286	1358071	0.01052	30.65050	4	3R_19921471_SNP	3R_19921471_SNP	FBgn0053100	4EHP	0	INTRON	50	61	205		HP
2L_22130275_SNP	FBgn0025674	CycK	133	UPSTREAM	57	65	205	1	2L_22130275_SNP	14756	1357235	0.01087	29.36638	4	3R_19921471_SNP	3R_19921471_SNP	FBgn0053100	4EHP	0	INTRON	50	61	205		HP
2L_22130283_SNP	FBgn0025674	CycK	141	UPSTREAM	55	63	205	1	2L_22130283_SNP	14728	1356637	0.01086	31.41808	4	3R_19921471_SNP	3R_19921471_SNP	FBgn0053100	4EHP	0	INTRON	50	61	205		HP
2L_22130291_SNP	FBgn0025674	CycK	149	UPSTREAM	51	59	205	1	2L_22130291_SNP	16653	1354532	0.01229	27.31395	4	3R_19921471_SNP	3R_19921471_SNP	FBgn0053100	4EHP	0	INTRON	50	61	205		HP
2L_22130620_SNP	FBgn0262885	CR43240	406	DOWNSTREAM	41	48	205	1	2L_22130620_SNP	10126	1343770	0.00754	22.12563	5	X_628214_SNP	X_628214_SNP	FBgn0021764	sdk	0	INTRON	50	61	205		HP
2L_22130694_SNP	FBgn0262885	CR43240	332	DOWNSTREAM	54	62	205	1	2L_22130694_SNP	14913	1355789	0.01100	30.54680	4	3R_19921471_SNP	3R_19921471_SNP	FBgn0053100	4EHP	0	INTRON	50	61	205		HP
2L_22130717_SNP	FBgn0262885	CR43240	309	DOWNSTREAM	55	63	205	1	2L_22130717_SNP	13759	1356537	0.01014	26.17693	4	3R_19921471_SNP	3R_19921471_SNP	FBgn0053100	4EHP	0	INTRON	50	61	205		HP
2L_22130731_SNP	FBgn0262885	CR43240	295	DOWNSTREAM	57	64	205	1	2L_22130731_SNP	14809	1357244	0.01091	35.49166	4	3R_19921471_SNP	3R_19921471_SNP	FBgn0053100	4EHP	0	INTRON	50	61	205		HP
2L_22130773_SNP	FBgn0262885	CR43240	253	DOWNSTREAM	51	58	205	1	2L_22130773_SNP	13042	1353261	0.00964	28.86864	2	2R_6871650_SNP	2R_6871650_SNP	FBgn0040765	luna	0	INTRON	17	22	205		HP
2L_22130776_SNP	FBgn0262885	CR43240	250	DOWNSTREAM	47	54	205	1	2L_22130776_SNP	12328	1350462	0.00913	26.92054	2	2R_6871650_SNP	2R_6871650_SNP	FBgn0040765	luna	0	INTRON	17	22	205		HP
2L_22130882_SNP	FBgn0262885	CR43240	144	DOWNSTREAM	59	67	205	1	2L_22130882_SNP	14602	1357954	0.01075	31.73533	4	3R_19921471_SNP	3R_19921471_SNP	FBgn0053100	4EHP	0	INTRON	50	61	205		HP
2L_22131583_SNP	FBgn0261802	CG42748	0	UTR_5_PRIME	55	63	205	1	2L_22131583_SNP	16025	1356835	0.01181	33.77580	4	3R_19921471_SNP	3R_19921471_SNP	FBgn0053100	4EHP	0	INTRON	50	61	205		HP
2L_22131629_SNP	FBgn0261802	CG42748	0	UTR_5_PRIME	59	67	205	1	2L_22131629_SNP	14456	1358269	0.01064	34.23982	4	3R_19921471_SNP	3R_19921471_SNP	FBgn0053100	4EHP	0	INTRON	50	61	205		HP
2L_2328995_SNP	FBgn0031414	eys	0	INTRON	18	22	205	1	2L_2328995_SNP	2301	1219373	0.00189	14.39599	4	3R_21585384_SNP	3R_21585384_SNP	FBgn0066101	LpR1	0	INTRON	38	48	205		HP
2L_3575104_SNP	FBgn0264370	CR43822	246	UPSTREAM	115	144	205	1	2L_3575104_SNP	31907	1334997	0.02390	28.08372	4	3R_25265611_SNP	3R_25265611_SNP	FBgn0004369	Ptp99A	0	INTRON	45	56	205		HP
2L_8191448_SNP	FBgn0031995	CG8475	0	INTRON	39	46	205	1	2L_8191448_SNP	3272	1338809	0.00244	17.71438	1	2L_4314066_SNP	2L_4314066_SNP	FBgn0010473	tutl	0	INTRON	125	156	205		HP
2L_8355912_SNP	FBgn0032026	CG7627	0	UTR_3_PRIME	15	18	205	1	2L_8355912_SNP	1602	1182812	0.00135	13.98527	3	3L_19283975_SNP	3L_19283975_SNP	FBgn0036862	Gbs-76A	0	INTRON	24	33	205		HP
2R_2959324_SNP	FBgn0050299	tRNA:CR30299	986	UPSTREAM	37	50	205	2	2R_2959324_SNP	7748	1339297	0.00579	22.65518	4	3R_11830898_SNP	3R_11830898_SNP	FBgn0262028	CR42839	0	EXON	36	45	205		HP
3L_10857155_SNP	FBgn0026160	tna	0	INTRON	55	72	205	3	3L_10857155_SNP	17645	1357722	0.01300	25.88062	5	X_2344371_SNP	X_2344371_SNP	FBgn0040388	boi	0	INTRON	38	50	205		HP
3L_11147791_SNP	FBgn0052082	CG32082	0	INTRON	8	8	205	3	3L_11147791_SNP	457	984377	0.00046	10.24973	3	3L_7651275_SNP	3L_7651275_SNP	FBgn0052373	CG32373	0	INTRON	147	187	205		HP
3L_3804810_SNP	FBgn0052264	CG32264	0	INTRON	40	51	205	3	3L_3804810_SNP	24538	1347185	0.01821	36.04532	5	X_5873710_SNP	X_5873710_SNP	FBgn0029830	Grip	0	INTRON	31	37	205		HP
3L_5500030_SNP	FBgn0085371	CG34342	0	INTRON	39	46	205	3	3L_5500030_SNP	7716	1339681	0.00576	30.83424	3	3L_24381589_SNP	3L_24381589_SNP	FBgn0259697	nvd	0	INTRON	8	10	205		HP
3L_7032548_SNP	FBgn0260660	mp	0	INTRON	74	94	205	3	3L_7032548_SNP	18089	1361130	0.01329	26.07710	1	2L_19874297_SNP	2L_19874297_SNP	FBgn0263873	sick	0	INTRON	42	50	205		HP
3L_7032580_SNP	FBgn0260660	mp	0	INTRON	76	97	205	3	3L_7032580_SNP	18487	1361312	0.01358	26.31131	1	2L_19874297_SNP	2L_19874297_SNP	FBgn0263873	sick	0	INTRON	42	50	205		HP
3L_9173690_SNP	FBgn0004244	Rdl	0	INTRON	47	62	205	3	3L_9173690_SNP	8452	1352254	0.00625	24.82858	3	3L_8639959_SNP	3L_8639959_SNP	FBgn0035921	CG13305	37	UPSTREAM	15	18	205		HP
3R_13570452_SNP	FBgn0038541	TyrRII	0	INTRON	35	46	205	4	3R_13570452_SNP	25009	1325345	0.01887	25.33443	1	2L_10923679_SNP	2L_10923679_SNP	FBgn0261871	dpr2	0	INTRON	16	20	205		HP
3R_13570469_SNP	FBgn0038541	TyrRII	0	INTRON	36	47	205	4	3R_13570469_SNP	23349	1328871	0.01757	24.86184	1	2L_10923679_SNP	2L_10923679_SNP	FBgn0261871	dpr2	0	INTRON	16	20	205		HP
3R_13570542_SNP	FBgn0038541	TyrRII	0	INTRON	41	51	205	4	3R_13570542_SNP	22037	1341344	0.01643	26.13779	5	X_18412914_SNP	X_18412914_SNP	FBgn0030935	CG15048	0	INTRON	118	144	205		HP
3R_16062316_SNP	FBgn0083975	CG34139	0	INTRON	15	20	205	4	3R_16062316_SNP	7439	1192528	0.00624	24.43976	3	3L_24381589_SNP	3L_24381589_SNP	FBgn0259697	nvd	0	INTRON	8	10	205		HP
3R_16078078_SNP	FBgn0262582	cic	414	UPSTREAM	19	24	205	4	3R_16078078_SNP	28898	1233005	0.02344	33.29387	5	X_13775729_SNP	X_13775729_SNP	FBgn0264981	mamo	0	INTRON	78	100	205		HP
3R_16133324_SNP	FBgn0038784	CG4362	66	UPSTREAM	12	16	205	4	3R_16133324_SNP	3332	1107410	0.00301	23.18188	3	3L_24381589_SNP	3L_24381589_SNP	FBgn0259697	nvd	0	INTRON	8	10	205		HP
3R_16140229_SNP	FBgn0261550	CG42668	0	INTRON	13	18	205	4	3R_16140229_SNP	5293	1136261	0.00466	25.50836	3	3L_24381589_SNP	3L_24381589_SNP	FBgn0259697	nvd	0	INTRON	8	10	205		HP
3R_16140420_SNP	FBgn0261550	CG42668	0	INTRON	11	14	205	4	3R_16140420_SNP	4461	1075889	0.00415	25.50836	3	3L_24381589_SNP	3L_24381589_SNP	FBgn0259697	nvd	0	INTRON	8	10	205		HP
3R_16140504_SNP	FBgn0261550	CG42668	0	INTRON	13	16	205	4	3R_16140504_SNP	5293	1136261	0.00466	25.50836	3	3L_24381589_SNP	3L_24381589_SNP	FBgn0259697	nvd	0	INTRON	8	10	205		HP
3R_16140543_SNP	FBgn0261550	CG42668	0	INTRON	13	17	205	4	3R_16140543_SNP	5293	1136261	0.00466	25.50836	3	3L_24381589_SNP	3L_24381589_SNP	FBgn0259697	nvd	0	INTRON	8	10	205		HP
3R_16140544_SNP	FBgn0261550	CG42668	0	INTRON	13	16	205	4	3R_16140544_SNP	5293	1136261	0.00466	25.50836	3	3L_24381589_SNP	3L_24381589_SNP	FBgn0259697	nvd	0	INTRON	8	10	205		HP
3R_16140564_SNP	FBgn0261550	CG42668	0	INTRON	13	17	205	4	3R_16140564_SNP	5092	1136260	0.00448	25.50836	3	3L_24381589_SNP	3L_24381589_SNP	FBgn0259697	nvd	0	INTRON	8	10	205		HP
3R_16140835_SNP	FBgn0261550	CG42668	0	INTRON	13	17	205	4	3R_16140835_SNP	5293	1136261	0.00466	25.50836	3	3L_24381589_SNP	3L_24381589_SNP	FBgn0259697	nvd	0	INTRON	8	10	205		HP
3R_19611309_SNP	FBgn0015513	mbc	0	INTRON	8	10	205	4	3R_19611309_SNP	1822	989427	0.00184	23.50025	3	3L_24381589_SNP	3L_24381589_SNP	FBgn0259697	nvd	0	INTRON	8	10	205		HP
3R_19611362_SNP	FBgn0015513	mbc	0	INTRON	10	13	205	4	3R_19611362_SNP	5359	1073561	0.00499	23.50025	3	3L_24381589_SNP	3L_24381589_SNP	FBgn0259697	nvd	0	INTRON	8	10	205		HP
3R_19611446_SNP	FBgn0015513	mbc	0	INTRON	21	24	205	4	3R_19611446_SNP	12121	1252835	0.00967	24.43287	1	2L_3788988_SNP	2L_3788988_SNP	FBgn0031571	CG3921	0	INTRON	45	58	205		HP
3R_19611480_SNP	FBgn0015513	mbc	0	INTRON	19	22	205	4	3R_19611480_SNP	9510	1234335	0.00770	24.53723	3	3L_24381589_SNP	3L_24381589_SNP	FBgn0259697	nvd	0	INTRON	8	10	205		HP
3R_19765011_SNP	FBgn0001098	Gdh	0	INTRON	102	133	205	4	3R_19765011_SNP	17720	1347245	0.01315	26.76719	3	3L_7522651_SNP	3L_7522651_SNP	FBgn0028582	lqf	0	INTRON	112	137	205		HP
3R_23315858_SNP	FBgn0039520	Gr98a	168	DOWNSTREAM	10	11	205	4	3R_23315858_SNP	32	1049006	0.00003	7.74622	5	X_5718369_SNP	X_5718369_SNP	FBgn0029814	CG15765	0	INTRON	78	102	205		HP
3R_23315867_SNP	FBgn0039520	Gr98a	177	DOWNSTREAM	10	12	205	4	3R_23315867_SNP	31	1049006	0.00003	7.68159	4	3R_20890860_SNP	3R_20890860_SNP	FBgn0039269	veli	0	INTRON	85	110	205		HP
3R_25202605_SNP	FBgn0004369	Ptp99A	763	UPSTREAM	17	24	205	4	3R_25202605_SNP	21713	1221198	0.01778	23.87892	5	X_3613930_SNP	X_3613930_SNP	FBgn0086899	tlk	110	UPSTREAM	60	82	205		HP
3R_25202883_SNP	FBgn0004369	Ptp99A	485	UPSTREAM	19	24	205	4	3R_25202883_SNP	4636	1224539	0.00379	17.54625	3	3L_3742153_SNP	3L_3742153_SNP	FBgn0052264	CG32264	0	INTRON	76	96	205		HP
3R_6186975_SNP	FBgn0015396	jumu	0	UTR_3_PRIME	92	116	205	4	3R_6186975_SNP	12809	1354822	0.00945	22.90147	3	3L_9560066_SNP	3L_9560066_SNP	FBgn0261555	CG42673	0	INTRON	8	11	205		HP
X_15714287_SNP	FBgn0003345	sd	0	INTRON	6	8	205	5	X_15714287_SNP	38618	881364	0.04382	14.86621	2	2R_3526486_SNP	2R_3526486_SNP	FBgn0263077	CG43340	0	INTRON	8	10	205		HP
X_16596962_SNP	FBgn0030778	CG4678	0	INTRON	10	16	205	5	X_16596962_SNP	42501	1105269	0.03845	38.44236	3	3L_24381589_SNP	3L_24381589_SNP	FBgn0259697	nvd	0	INTRON	8	10	205		HP
X_19109536_SNP	FBgn0031000	Muc18B	14	UPSTREAM	13	17	205	5	X_19109536_SNP	46	1159484	0.00004	11.14183	5	X_13350244_SNP	X_13350244_SNP	FBgn0265416	Neto	0	INTRON	10	13	205		HP
X_19157091_SNP	FBgn0040068	vav	0	INTRON	18	22	205	5	X_19157091_SNP	20983	1218413	0.01722	19.86735	2	2R_11831141_SNP	2R_11831141_SNP	FBgn0034053	Cyp4aa1	0	INTRON	20	25	205		HP
X_19520105_SNP	FBgn0031045	CG14212	0	NON_SYNONYMOUS_CODING	134	169	205	5	X_19520105_SNP	8644	1287165	0.00672	20.10049	3	3L_2423101_SNP	3L_2423101_SNP	FBgn0261551	CG42669	0	INTRON	42	53	205		HP
X_20323130_SNP	FBgn0052506	CG32506	0	INTRON	90	117	205	5	X_20323130_SNP	19656	1361442	0.01444	29.71582	2	2R_8615921_SNP	2R_8615921_SNP	FBgn0261545	CG42663	0	INTRON	50	64	205		HP
3R_9827173_SNP	FBgn0264493	rdx	0	INTRON	5	8	205	4	3R_9827173_SNP	154	842666	0.00018	9.69092	5	X_14080811_SNP	X_14080811_SNP	FBgn0030542	CG12481	475	UPSTREAM	7	11	205		AI
3R_21351842_SNP	FBgn0011666	msi	0	INTRON	7	8	205	4	3R_21351842_SNP	15166	943293	0.01608	15.26507	5	X_14777885_SNP	X_14777885_SNP	FBgn0264078	Flo-2	0	INTRON	14	21	205		AI
X_19634922_SNP	FBgn0031066	CoVIb	0	UTR_3_PRIME	6	9	205	5	X_19634922_SNP	19	880321	0.00002	9.34596	1	2L_11855280_SNP	2L_11855280_SNP	FBgn0264815	Pde1c	0	INTRON	13	19	205		AI
X_6539653_SNP	FBgn0029881	pigs	0	INTRON	8	10	205	5	X_6539653_SNP	25586	1023583	0.02500	16.10975	5	X_3459477_SNP	X_3459477_SNP	FBgn0052792	CG32792	0	INTRON	15	20	205		AI
3R_10206355_SNP	FBgn0038225	soti	30	DOWNSTREAM	6	11	205	4	3R_10206355_SNP	43736	896340	0.04879	16.63474	1	2L_8340671_SNP	2L_8340671_SNP	FBgn0032023	CG14274	0	INTRON	8	10	205		AI
2R_17358672_SNP	FBgn0010415	Sdc	0	INTRON	10	11	205	2	2R_17358672_SNP	35168	1082723	0.03248	21.03536	4	3R_15741367_SNP	3R_15741367_SNP	FBgn0038750	CG4465	223	DOWNSTREAM	24	34	205		AI
X_2353514_SNP	FBgn0040388	boi	0	INTRON	11	12	205	5	X_2353514_SNP	1042	1073556	0.00097	13.49058	5	X_19740995_SNP	X_19740995_SNP	FBgn0261811	pico	0	INTRON	8	11	205		AI
2R_6365544_SNP	FBgn0261862	whd	0	INTRON	8	12	205	2	2R_6365544_SNP	31305	984520	0.03180	19.21453	2	2R_6932569_SNP	2R_6932569_SNP	FBgn0040765	luna	0	INTRON	7	13	205		AI
3L_2619954_SNP	FBgn0011828	Pxn	0	INTRON	10	12	205	3	3L_2619954_SNP	27405	1083569	0.02529	21.43796	3	3L_18000109_SNP	3L_18000109_SNP	FBgn0000568	Eip75B	0	INTRON	46	58	205		AI
2R_17367566_SNP	FBgn0010415	Sdc	0	INTRON	14	16	205	2	2R_17367566_SNP	33745	1194282	0.02826	26.32851	3	3L_17026097_SNP	3L_17026097_SNP	FBgn0262895	CG43250	122	DOWNSTREAM	91	110	205		AI
2R_16956186_SNP	FBgn0034582	Cht9	0	INTRON	16	19	205	2	2R_16956186_SNP	27867	1202103	0.02318	24.79723	1	2L_5661906_SNP	2L_5661906_SNP	FBgn0031728	Hsp60C	943	UPSTREAM	103	130	205		AI
2R_16956194_SNP	FBgn0034582	Cht9	0	INTRON	16	19	205	2	2R_16956194_SNP	27616	1202103	0.02297	25.50486	1	2L_5661906_SNP	2L_5661906_SNP	FBgn0031728	Hsp60C	943	UPSTREAM	103	130	205		AI
X_2354612_SNP	FBgn0040388	boi	0	INTRON	15	21	205	5	X_2354612_SNP	25963	1165787	0.02227	37.32617	2	2R_1095318_SNP	2R_1095318_SNP	FBgn0053554	Nipped-A	0	INTRON	9	12	205		AI
X_2354613_SNP	FBgn0040388	boi	0	INTRON	15	21	205	5	X_2354613_SNP	26801	1165794	0.02299	37.32617	2	2R_1095318_SNP	2R_1095318_SNP	FBgn0053554	Nipped-A	0	INTRON	9	12	205		AI
2R_6646602_SNP	FBgn0053144	CG33144	0	INTRON	15	23	205	2	2R_6646602_SNP	77	1194656	0.00006	13.85935	3	3L_18993580_SNP	3L_18993580_SNP	FBgn0036838	CG3808	0	NON_SYNONYMOUS_CODING	7	10	205		AI
2R_6646607_SNP	FBgn0053144	CG33144	0	INTRON	16	24	205	2	2R_6646607_SNP	155	1210075	0.00013	17.24140	3	3L_18993580_SNP	3L_18993580_SNP	FBgn0036838	CG3808	0	NON_SYNONYMOUS_CODING	7	10	205		AI
3L_19458208_SNP	FBgn0036870	CG14095	349	UPSTREAM	20	24	205	3	3L_19458208_SNP	55766	1244061	0.04483	33.01406	1	2L_6585825_SNP	2L_6585825_SNP	FBgn0031835	CG11319	0	INTRON	61	76	205		AI
3L_19326698_SNP	FBgn0003089	pip	0	INTRON	21	28	205	3	3L_19326698_SNP	38602	1252993	0.03081	29.71334	2	2R_14022682_SNP	2R_14022682_SNP	FBgn0003044	Pcl	237	UPSTREAM	68	88	205		AI
3R_24451849_SNP	FBgn0039590	CG10011	0	INTRON	20	30	205	4	3R_24451849_SNP	58387	1230891	0.04743	35.77340	3	3L_10651347_SNP	3L_10651347_SNP	FBgn0052066	CG32066	0	INTRON	23	28	205		AI
3R_25056759_SNP	FBgn0028476	CG15817	0	INTRON	26	31	205	4	3R_25056759_SNP	61639	1269144	0.04857	37.11103	5	X_20685456_SNP	X_20685456_SNP	FBgn0085387	shakB	0	INTRON	42	49	205		AI
2L_1026455_SNP	FBgn0031294	IA-2	0	INTRON	25	34	205	1	2L_1026455_SNP	34149	1288253	0.02651	31.35016	4	3R_24934064_SNP	3R_24934064_SNP	FBgn0039633	CG11873	0	UTR_3_PRIME	103	130	205		AI
X_15356921_SNP	FBgn0030641	CG6299	0	UTR_5_PRIME	30	36	205	5	X_15356921_SNP	30347	1314983	0.02308	33.71292	5	X_7631134_SNP	X_7631134_SNP	FBgn0016041	Tom40	252	UPSTREAM	95	118	205		AI
2L_8185446_SNP	FBgn0264953	Piezo	0	INTRON	36	41	205	1	2L_8185446_SNP	2309	1324214	0.00174	20.37671	2	2R_3702553_SNP	2R_3702553_SNP	FBgn0033226	CG1882	303	DOWNSTREAM	12	17	205		AI
3R_11724287_SNP	FBgn0027657	glob1	0	INTRON	36	47	205	4	3R_11724287_SNP	26837	1329055	0.02019	29.30125	1	2L_15232206_SNP	2L_15232206_SNP	FBgn0028516	ZnT35C	0	INTRON	40	49	205		AI
3R_11724264_SNP	FBgn0027657	glob1	0	INTRON	36	48	205	4	3R_11724264_SNP	26147	1329965	0.01966	30.92379	1	2L_4076077_SNP	2L_4076077_SNP	FBgn0000547	ed	0	INTRON	37	47	205		AI
2R_6300666_SNP	FBgn0261698	CG42732	0	INTRON	66	86	205	2	2R_6300666_SNP	15684	1360225	0.01153	28.12736	2	2R_16312855_SNP	2R_16312855_SNP	FBgn0086604	CG12484	0	INTRON	91	116	205		AI
2R_6300667_SNP	FBgn0261698	CG42732	0	INTRON	68	87	205	2	2R_6300667_SNP	14650	1360618	0.01077	26.18360	5	X_1839897_SNP	X_1839897_SNP	FBgn0264562	Hr4	0	INTRON	8	11	205		AI
X_11126046_SNP	FBgn0261569	CG42683	0	INTRON	77	92	205	5	X_11126046_SNP	13271	1361035	0.00975	23.67375	3	3L_2861778_SNP	3L_2861778_SNP	FBgn0263392	CG43444	0	INTRON	140	174	205		AI
X_998715_SNP	FBgn0040397	CG3655	0	INTRON	88	109	205	5	X_998715_SNP	9035	1356659	0.00666	22.82044	2	2R_16482805_SNP	2R_16482805_SNP	FBgn0015907	bl	0	INTRON	59	75	205		AI
2R_9585171_SNP	FBgn0000633	fas	0	INTRON	99	126	205	2	2R_9585171_SNP	24250	1356449	0.01788	28.18373	2	2R_12832704_SNP	2R_12832704_SNP	FBgn0003091	Pkc53E	73	DOWNSTREAM	120	152	205		AI
3L_16820115_SNP	FBgn0036665	CG13024	0	INTRON	133	164	205	3	3L_16820115_SNP	52551	1299931	0.04043	36.26777	1	2L_8695949_SNP	2L_8695949_SNP	FBgn0004914	Hnf4	0	INTRON	65	80	205		AI
X_13020488_SNP	FBgn0052638	CG32638	0	INTRON	137	166	205	5	X_13020488_SNP	19102	1226071	0.01558	32.10343	3	3L_18687065_SNP	3L_18687065_SNP	FBgn0264719	CR43987	13	UPSTREAM	10	16	205		AI

## Sheet: FractionalShortening
1_ID	1_FlybaseID	1_GeneSymbol	1_Position	1_Type	1_NbOfLinesForMutationInEpistasis	1_NbOfLinesForMutationInDB	1_TotalNbOfLinesinDB	1_CHR	1_SNP	N_SIG	N_TOT	PROP	CHISQ	2_CHR	2_SNP	2_ID	2_FlybaseID	2_GeneSymbol	2_Position	2_Type	2_NbOfLinesForMutationInEpistasis	2_NbOfLinesForMutationInDB	2_TotalNbOfLinesinDB
2L_11190559_SNP	FBgn0259822	Ca-beta	0	INTRON	42	50	205	1	2L_11190559_SNP	10172	1345972	0.00756	23.91303	1	2L_1831426_SNP	2L_1831426_SNP	FBgn0031367	c-cup	201	DOWNSTREAM	94	113	205
2L_11190564_SNP	FBgn0259822	Ca-beta	0	INTRON	41	49	205	1	2L_11190564_SNP	10199	1345713	0.00758	22.90160	1	2L_1831426_SNP	2L_1831426_SNP	FBgn0031367	c-cup	201	DOWNSTREAM	94	113	205
2L_12163772_SNP	FBgn0051760	CG31760	0	INTRON	11	13	205	1	2L_12163772_SNP	545	1110568	0.00049	11.50622	2	2R_12441133_SNP	2R_12441133_SNP	FBgn0034135	Syn2	0	INTRON	12	14	205
2L_12599794_SNP	FBgn0085424	nub	0	INTRON	12	14	205	1	2L_12599794_SNP	3560	1091559	0.00326	16.16473	2	2R_14508948_SNP	2R_14508948_SNP	FBgn0034366	Atg7	0	INTRON	13	16	205
2L_12600138_SNP	FBgn0085424	nub	0	INTRON	17	21	205	1	2L_12600138_SNP	5719	1214511	0.00471	17.32547	1	2L_10131351_SNP	2L_10131351_SNP	FBgn0265002	CG44153	0	INTRON	72	91	205
2L_15191720_SNP	FBgn0028888	CG4168	0	INTRON	56	79	205	1	2L_15191720_SNP	15414	1357467	0.01135	28.20639	1	2L_17502449_SNP	2L_17502449_SNP	FBgn0013810	Dhc36C	0	INTRON	55	71	205
2L_4341367_SNP	FBgn0020762	Atet	0	INTRON	61	80	205	1	2L_4341367_SNP	18580	1358740	0.01367	35.17159	1	2L_17624989_SNP	2L_17624989_SNP	FBgn0032654	CG15147	111	DOWNSTREAM	61	83	205
2L_4686131_SNP	FBgn0031620	CG11929	0	NON_SYNONYMOUS_CODING	94	127	205	1	2L_4686131_SNP	20192	1350259	0.01495	33.00398	2	2R_6934177_SNP	2R_6934177_SNP	FBgn0040765	luna	0	INTRON	48	65	205
2L_7210639_SNP	FBgn0031897	CG13784	0	INTRON	23	25	205	1	2L_7210639_SNP	6448	1268293	0.00508	20.53855	1	2L_1029907_SNP	2L_1029907_SNP	FBgn0031294	IA-2	0	INTRON	39	50	205
2L_7900140_SNP	FBgn0085450	Snoo	0	INTRON	43	55	205	1	2L_7900140_SNP	16945	1345862	0.01259	25.98316	1	2L_7105739_SNP	2L_7105739_SNP	FBgn0085407	Pvf3	0	INTRON	96	126	205
2L_7900144_SNP	FBgn0085450	Snoo	0	INTRON	43	55	205	1	2L_7900144_SNP	17218	1346742	0.01278	26.19273	1	2L_7105739_SNP	2L_7105739_SNP	FBgn0085407	Pvf3	0	INTRON	96	126	205
2R_12567383_SNP	FBgn0050463	CG30463	0	INTRON	44	50	205	2	2R_12567383_SNP	18565	1347400	0.01378	30.84999	1	2L_16817694_SNP	2L_16817694_SNP	FBgn0004797	mdy	0	INTRON	15	17	205
2R_16139153_SNP	FBgn0034490	CG9864	0	INTRON	70	91	205	2	2R_16139153_SNP	15981	1360978	0.01174	32.40640	4	3R_15621363_SNP	3R_15621363_SNP	FBgn0014135	bnl	0	INTRON	20	27	205
2R_2583342_SNP	FBgn0259483	Mob4	0	INTRON	72	91	205	2	2R_2583342_SNP	20187	1361154	0.01483	31.45918	4	3R_17486963_SNP	3R_17486963_SNP	FBgn0038893	CG6353	0	UTR_3_PRIME	42	57	205
2R_2869600_SNP	FBgn0050156	CG30156	0	NON_SYNONYMOUS_CODING	9	10	205	2	2R_2869600_SNP	1	1050590	0.00000	7.22553	2	2R_7648286_SNP	2R_7648286_SNP	FBgn0033652	ths	0	INTRON	8	11	205
3L_11508722_SNP	FBgn0036168	CG7512	0	INTRON	17	19	205	3	3L_11508722_SNP	1985	1219446	0.00163	15.35005	3	3L_1281914_SNP	3L_1281914_SNP	FBgn0052333	CG32333	0	INTRON	15	16	205
3L_11513190_SNP	FBgn0036169	Fuca	0	INTRON	14	16	205	3	3L_11513190_SNP	10	1168165	0.00001	8.03444	1	2L_13888761_SNP	2L_13888761_SNP	FBgn0028509	cenG1A	0	INTRON	138	181	205
3L_11638743_SNP	FBgn0036186	CG6071	0	NON_SYNONYMOUS_CODING	82	102	205	3	3L_11638743_SNP	16878	1360996	0.01240	28.72010	4	3R_17042030_SNP	3R_17042030_SNP	FBgn0038868	CG5862	82	DOWNSTREAM	15	18	205
3L_12287863_SNP	FBgn0036274	CG4328	0	INTRON	28	35	205	3	3L_12287863_SNP	8213	1303852	0.00630	25.18176	3	3L_2762921_SNP	3L_2762921_SNP	FBgn0052296	Mrtf	0	INTRON	67	90	205
3L_14072155_SNP	FBgn0005592	btl	0	INTRON	50	63	205	3	3L_14072155_SNP	12787	1351955	0.00946	30.10592	4	3R_20842801_SNP	3R_20842801_SNP	FBgn0039257	tnc	0	NON_SYNONYMOUS_CODING	114	147	205
3L_14072337_SNP	FBgn0005592	btl	0	INTRON	63	79	205	3	3L_14072337_SNP	14551	1359287	0.01070	32.47923	3	3L_10074676_SNP	3L_10074676_SNP	FBgn0040823	dpr6	0	INTRON	128	166	205
3L_14101884_SNP	FBgn0036411	Sox21a	666	UPSTREAM	44	57	205	3	3L_14101884_SNP	21105	1340386	0.01575	44.17499	3	3L_23265047_SNP	3L_23265047_SNP	FBgn0037212	nAcRalpha-80B	0	INTRON	14	25	205
3L_15055188_SNP	FBgn0261090	Sytbeta	0	INTRON	55	71	205	3	3L_15055188_SNP	17719	1356849	0.01306	29.14485	1	2L_12132429_SNP	2L_12132429_SNP	FBgn0032415	rho-6	0	INTRON	7	11	205
3L_15055200_SNP	FBgn0261090	Sytbeta	0	INTRON	61	78	205	3	3L_15055200_SNP	16852	1358722	0.01240	27.24223	1	2L_12132429_SNP	2L_12132429_SNP	FBgn0032415	rho-6	0	INTRON	7	11	205
3L_15055205_SNP	FBgn0261090	Sytbeta	0	INTRON	61	78	205	3	3L_15055205_SNP	17313	1358894	0.01274	27.93065	5	X_312375_SNP	X_312375_SNP	FBgn0052816	CG32816	0	INTRON	59	83	205
3L_15055212_SNP	FBgn0261090	Sytbeta	0	INTRON	63	80	205	3	3L_15055212_SNP	17484	1359494	0.01286	27.08182	1	2L_12132429_SNP	2L_12132429_SNP	FBgn0032415	rho-6	0	INTRON	7	11	205
3L_15055287_SNP	FBgn0261090	Sytbeta	0	INTRON	62	79	205	3	3L_15055287_SNP	17152	1359316	0.01262	29.24930	1	2L_12132429_SNP	2L_12132429_SNP	FBgn0032415	rho-6	0	INTRON	7	11	205
3L_16860553_SNP	FBgn0261565	Lmpt	0	INTRON	8	8	205	3	3L_16860553_SNP	17571	970351	0.01811	15.68514	4	3R_20716887_SNP	3R_20716887_SNP	FBgn0051121	CG31121	0	INTRON	10	12	205
3L_2328726_SNP	FBgn0035331	DmsR-1	0	INTRON	11	16	205	3	3L_2328726_SNP	220	1113366	0.00020	10.41974	5	X_19237040_SNP	X_19237040_SNP	FBgn0086778	gfA	0	INTRON	24	35	205
3L_4534458_SNP	FBgn0035557	CG11353	0	INTRON	42	53	205	3	3L_4534458_SNP	16103	1346407	0.01196	23.00493	3	3L_10984029_SNP	3L_10984029_SNP	FBgn0013469	klu	0	INTRON	40	55	205
3L_8775199_SNP	FBgn0261259	Fhos	0	INTRON	17	21	205	3	3L_8775199_SNP	603	1186022	0.00051	12.72715	3	3L_2046232_SNP	3L_2046232_SNP	FBgn0086906	sls	0	INTRON	18	27	205
3L_938314_SNP	FBgn0264574	Glut1	0	INTRON	49	65	205	3	3L_938314_SNP	22347	1353993	0.01650	32.39278	2	2R_14580701_SNP	2R_14580701_SNP	FBgn0262103	Sik3	0	INTRON	120	153	205
3R_11817181_SNP	FBgn0003507	srp	0	INTRON	33	45	205	4	3R_11817181_SNP	5029	1319429	0.00381	19.00009	2	2R_16425831_SNP	2R_16425831_SNP	FBgn0034513	CG13423	62	DOWNSTREAM	51	63	205
3R_12546376_SNP	FBgn0003944	Ubx	0	INTRON	81	106	205	4	3R_12546376_SNP	16928	1357967	0.01247	30.32125	4	3R_24874996_SNP	3R_24874996_SNP	FBgn0003093	Pkc98E	126	DOWNSTREAM	25	30	205
3R_19781053_SNP	FBgn0005674	Aats-glupro	0	INTRON	47	59	205	4	3R_19781053_SNP	19636	1351037	0.01453	28.31227	5	X_222372_SNP	X_222372_SNP	FBgn0052816	CG32816	0	INTRON	66	92	205
3R_20617376_SNP	FBgn0039225	Ets96B	0	INTRON	102	137	205	4	3R_20617376_SNP	18851	1350507	0.01396	28.90598	4	3R_23508084_SNP	3R_23508084_SNP	FBgn0003330	Sce	333	UPSTREAM	86	109	205
3R_21194376_SNP	FBgn0004509	Fur1	0	INTRON	136	176	205	4	3R_21194376_SNP	4383	1174072	0.00373	16.51324	3	3L_507546_SNP	3L_507546_SNP	FBgn0001316	klar	0	INTRON	18	24	205
3R_21194412_SNP	FBgn0004509	Fur1	0	INTRON	136	176	205	4	3R_21194412_SNP	3803	1174071	0.00324	18.11796	3	3L_507546_SNP	3L_507546_SNP	FBgn0001316	klar	0	INTRON	18	24	205
3R_21194422_SNP	FBgn0004509	Fur1	0	INTRON	134	172	205	4	3R_21194422_SNP	4487	1174071	0.00382	16.49367	3	3L_507546_SNP	3L_507546_SNP	FBgn0001316	klar	0	INTRON	18	24	205
3R_21194431_SNP	FBgn0004509	Fur1	0	INTRON	135	172	205	4	3R_21194431_SNP	3893	1174070	0.00332	17.25763	3	3L_507546_SNP	3L_507546_SNP	FBgn0001316	klar	0	INTRON	18	24	205
3R_21194440_SNP	FBgn0004509	Fur1	0	INTRON	134	172	205	4	3R_21194440_SNP	4524	1174071	0.00385	16.34867	3	3L_507546_SNP	3L_507546_SNP	FBgn0001316	klar	0	INTRON	18	24	205
3R_25318629_SNP	FBgn0039665	CG2310	0	INTRON	33	43	205	4	3R_25318629_SNP	11463	1324870	0.00865	26.68358	5	X_2413556_SNP	X_2413556_SNP	FBgn0261451	trol	0	INTRON	71	89	205
3R_3402277_SNP	FBgn0083963	CG34127	0	INTRON	97	129	205	4	3R_3402277_SNP	15972	1348423	0.01184	29.58648	1	2L_10119466_SNP	2L_10119466_SNP	FBgn0265002	CG44153	0	INTRON	73	89	205
3R_5096375_SNP	FBgn0261241	Vps16A	429	DOWNSTREAM	44	62	205	4	3R_5096375_SNP	11252	1348829	0.00834	21.63884	3	3L_1700663_SNP	3L_1700663_SNP	FBgn0035260	CG7991	0	INTRON	65	79	205
3R_5096376_SNP	FBgn0261241	Vps16A	430	DOWNSTREAM	51	69	205	4	3R_5096376_SNP	14079	1355004	0.01039	23.96077	5	X_16893482_SNP	X_16893482_SNP	FBgn0030810	CG9059	0	INTRON	119	159	205
X_11123801_SNP	FBgn0261569	CG42683	0	INTRON	47	69	205	5	X_11123801_SNP	7912	1351032	0.00586	18.64733	5	X_7528359_SNP	X_7528359_SNP	FBgn0004198	ct	0	INTRON	71	88	205
X_13749375_SNP	FBgn0264981	mamo	0	NON_SYNONYMOUS_CODING	11	16	205	5	X_13749375_SNP	82	1104887	0.00007	9.69087	2	2R_3457962_SNP	2R_3457962_SNP	FBgn0033194	Vps13	0	INTRON	11	12	205
X_15524532_SNP	FBgn0003463	sog	0	INTRON	108	138	205	5	X_15524532_SNP	15996	1351898	0.01183	26.69484	2	2R_1317489_SNP	2R_1317489_SNP	FBgn0259247	laccase2	0	INTRON	46	55	205
X_17207839_SNP	FBgn0004854	B-H2	775	UPSTREAM	45	56	205	5	X_17207839_SNP	20102	1349801	0.01489	29.21299	4	3R_12187882_SNP	3R_12187882_SNP	FBgn0038422	CG14880	0	INTRON	42	51	205
X_17208096_SNP	FBgn0004854	B-H2	518	UPSTREAM	38	50	205	5	X_17208096_SNP	19214	1336981	0.01437	23.82560	1	2L_7762987_SNP	2L_7762987_SNP	FBgn0031944	CG7196	0	INTRON	49	65	205
X_7060779_SNP	FBgn0029939	CG9650	0	INTRON	8	9	205	5	X_7060779_SNP	2	1031868	0.00000	8.66118	2	2R_15488793_SNP	2R_15488793_SNP	FBgn0003435	sm	0	INTRON	9	11	205
X_9063326_SNP	FBgn0026206	mei-P26	0	INTRON	82	109	205	5	X_9063326_SNP	12926	1360931	0.00950	24.28285	3	3L_10069907_SNP	3L_10069907_SNP	FBgn0040823	dpr6	0	INTRON	12	16	205
X_9063484_SNP	FBgn0026206	mei-P26	0	INTRON	93	121	205	5	X_9063484_SNP	11517	1359509	0.00847	28.52787	2	2R_8242026_SNP	2R_8242026_SNP	FBgn0050047	CG30047	0	INTRON	81	106	205

## Sheet: EndSystolicDiameter
1_ID	1_FlybaseID	1_GeneSymbol	1_Position	1_Type	1_NbOfLinesForMutationInEpistasis	1_NbOfLinesForMutationInDB	1_TotalNbOfLinesinDB	1_CHR	1_SNP	N_SIG	N_TOT	PROP	CHISQ	2_CHR	2_SNP	2_ID	2_FlybaseID	2_GeneSymbol	2_Position	2_Type	2_NbOfLinesForMutationInEpistasis	2_NbOfLinesForMutationInDB	2_TotalNbOfLinesinDB
2L_11279606_SNP	FBgn0052831	CG33695	0	UTR_3_PRIME	129	177	205	1	2L_11279606_SNP	2561	1226713	0.00209	14.08740	3	3L_540056_SNP	3L_540056_SNP	FBgn0001316	klar	0	UTR_5_PRIME	8	14	205
2L_11280190_SNP	FBgn0265071	CR44182	0	EXON	135	185	205	1	2L_11280190_SNP	359	1217390	0.00029	12.97183	1	2L_18872067_SNP	2L_18872067_SNP	FBgn0003896	tup	0	INTRON	13	19	205
2L_11280405_SNP	FBgn0032358	Ppt2	0	NON_SYNONYMOUS_CODING	117	161	205	1	2L_11280405_SNP	14305	1300560	0.01100	24.17229	1	2L_6455154_SNP	2L_6455154_SNP	FBgn0031814	retm	0	INTRON	35	45	205
2L_13414855_SNP	FBgn0032523	CG16956	280	UPSTREAM	80	105	205	1	2L_13414855_SNP	15211	1351170	0.01126	30.32579	3	3L_4077346_SNP	3L_4077346_SNP	FBgn0004516	Gad1	0	INTRON	15	20	205
2L_13414857_SNP	FBgn0032523	CG16956	282	UPSTREAM	77	102	205	1	2L_13414857_SNP	15341	1351979	0.01135	34.94204	3	3L_4077346_SNP	3L_4077346_SNP	FBgn0004516	Gad1	0	INTRON	15	20	205
2L_22193298_SNP	FBgn0259683	Ir40a	0	INTRON	25	30	205	1	2L_22193298_SNP	16023	1303507	0.01229	23.96311	1	2L_3719155_SNP	2L_3719155_SNP	FBgn0003386	Shaw	0	INTRON	33	41	205
2L_22199491_SNP	FBgn0259683	Ir40a	0	INTRON	9	11	205	1	2L_22199491_SNP	701	1058722	0.00066	13.49412	5	X_1572484_SNP	X_1572484_SNP	FBgn0023531	CG32809	0	INTRON	11	16	205
2L_5063853_SNP	FBgn0028572	qtc	0	INTRON	22	32	205	1	2L_5063853_SNP	16706	1245949	0.01341	23.42555	4	3R_9045651_SNP	3R_9045651_SNP	FBgn0038127	CG8476	0	NON_SYNONYMOUS_CODING	96	128	205
2L_7703725_SNP	FBgn0041181	Tep3	0	INTRON	95	122	205	1	2L_7703725_SNP	6167	1349333	0.00457	19.17456	3	3L_14068671_SNP	3L_14068671_SNP	FBgn0013563	Pex1	0	INTRON	30	36	205
2L_914246_SNP	FBgn0046113	GluRIIC	0	NON_SYNONYMOUS_CODING	111	145	205	1	2L_914246_SNP	12473	1327133	0.00940	20.90762	4	3R_5076038_SNP	3R_5076038_SNP	FBgn0037664	CG8420	0	INTRON	71	93	205
2R_11850717_SNP	FBgn0265045	Strn-Mlck	0	INTRON	101	133	205	2	2R_11850717_SNP	13974	1349957	0.01035	25.99917	2	2R_18717216_SNP	2R_18717216_SNP	FBgn0050272	CG30272	4	UPSTREAM	18	21	205
2R_13339275_SNP	FBgn0028956	mthl3	0	INTRON	13	15	205	2	2R_13339275_SNP	82	1143487	0.00007	10.69176	4	3R_17908276_SNP	3R_17908276_SNP	FBgn0038929	CG13408	0	INTRON	105	132	205
2R_13752655_SNP	FBgn0003701	thr	0	NON_SYNONYMOUS_CODING	81	113	205	2	2R_13752655_SNP	13965	1360907	0.01026	27.61882	4	3R_16273119_SNP	3R_16273119_SNP	FBgn0262869	mun	0	INTRON	47	61	205
2R_14554458_SNP	FBgn0023214	edl	568	DOWNSTREAM	15	22	205	2	2R_14554458_SNP	10380	1199029	0.00866	18.12816	4	3R_25961727_SNP	3R_25961727_SNP	FBgn0039747	AdoR	0	NON_SYNONYMOUS_CODING	42	53	205
2R_14554464_SNP	FBgn0023214	edl	562	DOWNSTREAM	120	151	205	2	2R_14554464_SNP	16822	1302964	0.01291	24.65494	1	2L_2671324_SNP	2L_2671324_SNP	FBgn0041248	Gr23a	0	INTRON	71	95	205
2R_14955367_SNP	FBgn0004168	5-HT1A	0	INTRON	73	94	205	2	2R_14955367_SNP	14127	1354678	0.01043	32.08165	4	3R_27805902_SNP	3R_27805902_SNP	FBgn0011224	heph	0	INTRON	8	11	205
2R_14955549_SNP	FBgn0004168	5-HT1A	0	INTRON	89	115	205	2	2R_14955549_SNP	15161	1356184	0.01118	28.74977	1	2L_10799060_SNP	2L_10799060_SNP	FBgn0051869	CG31869	0	INTRON	23	28	205
2R_14955563_SNP	FBgn0004168	5-HT1A	0	INTRON	89	116	205	2	2R_14955563_SNP	15091	1356624	0.01112	29.27906	1	2L_10799060_SNP	2L_10799060_SNP	FBgn0051869	CG31869	0	INTRON	23	28	205
2R_16878772_SNP	FBgn0034568	CG3216	96	UPSTREAM	15	20	205	2	2R_16878772_SNP	2176	1199993	0.00181	16.06971	3	3L_13872668_SNP	3L_13872668_SNP	FBgn0036382	CG13737	0	INTRON	17	24	205
2R_7527574_SNP	FBgn0033638	CG9005	0	INTRON	9	11	205	2	2R_7527574_SNP	14	1069224	0.00001	7.46110	2	2R_18169434_SNP	2R_18169434_SNP	FBgn0020307	dve	0	INTRON	84	114	205
3L_11547252_SNP	FBgn0259481	Mob2	0	INTRON	45	55	205	3	3L_11547252_SNP	6866	1349803	0.00509	23.17326	5	X_19286400_SNP	X_19286400_SNP	FBgn0031016	kek5	0	INTRON	16	24	205
3L_12328810_SNP	FBgn0052105	CG32105	0	UTR_3_PRIME	138	186	205	3	3L_12328810_SNP	2045	1193632	0.00171	13.64301	4	3R_19129137_SNP	3R_19129137_SNP	FBgn0003118	pnt	0	INTRON	20	25	205
3L_12695268_SNP	FBgn0014343	mirr	0	INTRON	8	11	205	3	3L_12695268_SNP	20319	968402	0.02098	17.08370	3	3L_10109268_SNP	3L_10109268_SNP	FBgn0040823	dpr6	0	INTRON	31	39	205
3L_12700855_SNP	FBgn0014343	mirr	0	INTRON	116	155	205	3	3L_12700855_SNP	15081	1320892	0.01142	24.54161	4	3R_24843955_SNP	3R_24843955_SNP	FBgn0039620	CG1443	0	INTRON	29	38	205
3L_13892964_SNP	FBgn0264006	dysc	0	INTRON	11	12	205	3	3L_13892964_SNP	4638	1060439	0.00437	14.23070	4	3R_9659783_SNP	3R_9659783_SNP	FBgn0013998	Nsf2	412	DOWNSTREAM	123	160	205
3L_21958637_SNP	FBgn0029091	CS-2	0	INTRON	24	32	205	3	3L_21958637_SNP	5945	1284299	0.00463	15.88242	3	3L_7227066_SNP	3L_7227066_SNP	FBgn0035750	CG14826	546	UPSTREAM	9	11	205
3L_2427329_SNP	FBgn0261551	CG42669	0	INTRON	31	40	205	3	3L_2427329_SNP	34165	1314308	0.02599	30.08660	4	3R_16558352_SNP	3R_16558352_SNP	FBgn0051205	CG31205	26	DOWNSTREAM	78	109	205
3L_2995130_SNP	FBgn0035384	CG2113	42	UPSTREAM	85	118	205	3	3L_2995130_SNP	14242	1360347	0.01047	25.63760	2	2R_20318326_SNP	2R_20318326_SNP	FBgn0035003	CG15873	190	UPSTREAM	38	45	205
3L_4917049_SNP	FBgn0028699	Rh50	0	INTRON	79	105	205	3	3L_4917049_SNP	15431	1360952	0.01134	28.79297	4	3R_24899201_SNP	3R_24899201_SNP	FBgn0039633	CG11873	0	INTRON	13	19	205
3L_4917323_SNP	FBgn0028699	Rh50	0	INTRON	76	99	205	3	3L_4917323_SNP	15288	1361216	0.01123	23.28452	4	3R_14739433_SNP	3R_14739433_SNP	FBgn0038660	CG14291	789	UPSTREAM	72	98	205
3L_7485511_SNP	FBgn0035790	Cyp316a1	0	NON_SYNONYMOUS_CODING	22	29	205	3	3L_7485511_SNP	2698	1281634	0.00211	15.76922	1	2L_19396254_SNP	2L_19396254_SNP	FBgn0032775	CG17544	0	INTRON	53	65	205
3R_12961295_SNP	FBgn0051267	CG31267	290	DOWNSTREAM	19	25	205	4	3R_12961295_SNP	12730	1239674	0.01027	23.99664	4	3R_27475157_SNP	3R_27475157_SNP	FBgn0039862	kek6	0	INTRON	18	29	205
3R_15309412_SNP	FBgn0260003	Dys	0	INTRON	12	19	205	4	3R_15309412_SNP	25175	1140781	0.02207	23.29020	1	2L_10073594_SNP	2L_10073594_SNP	FBgn0265002	CG44153	0	INTRON	9	11	205
3R_4043437_SNP	FBgn0037552	CG7800	242	UPSTREAM	70	97	205	4	3R_4043437_SNP	14632	1358247	0.01077	26.53006	5	X_11130913_SNP	X_11130913_SNP	FBgn0261569	CG42683	0	INTRON	17	19	205
3R_4153850_SNP	FBgn0003129	Poxm	0	INTRON	30	41	205	4	3R_4153850_SNP	8135	1317740	0.00617	20.66401	5	X_7308042_SNP	X_7308042_SNP	FBgn0261616	CG42705	0	INTRON	17	19	205
3R_4537507_SNP	FBgn0037612	CG8112	0	INTRON	62	90	205	4	3R_4537507_SNP	16262	1358045	0.01197	34.75427	5	X_8781785_SNP	X_8781785_SNP	FBgn0011661	Moe	0	INTRON	84	115	205
3R_4538350_SNP	FBgn0037612	CG8112	0	INTRON	39	55	205	4	3R_4538350_SNP	15712	1342319	0.01171	30.65422	1	2L_955974_SNP	2L_955974_SNP	FBgn0028481	CG4341	0	INTRON	12	19	205
3R_4538400_SNP	FBgn0037612	CG8112	0	INTRON	53	75	205	4	3R_4538400_SNP	14159	1355803	0.01044	23.66651	3	3L_13080563_SNP	3L_13080563_SNP	FBgn0036345	CG17300	174	UPSTREAM	39	50	205
3R_4550464_SNP	FBgn0037617	CG8145	30	DOWNSTREAM	60	84	205	4	3R_4550464_SNP	14646	1356789	0.01079	28.05191	3	3L_5058625_SNP	3L_5058625_SNP	FBgn0005775	Con	0	INTRON	60	82	205
3R_4559608_SNP	FBgn0037622	CG8202	0	NON_SYNONYMOUS_CODING	19	28	205	4	3R_4559608_SNP	26380	1257134	0.02098	26.07951	4	3R_24843955_SNP	3R_24843955_SNP	FBgn0039620	CG1443	0	INTRON	29	38	205
3R_9799395_SNP	FBgn0264493	rdx	0	INTRON	84	116	205	4	3R_9799395_SNP	15921	1357157	0.01173	29.85726	2	2R_8605339_SNP	2R_8605339_SNP	FBgn0261545	CG42663	0	INTRON	26	31	205
3R_9799511_SNP	FBgn0264493	rdx	0	INTRON	98	129	205	4	3R_9799511_SNP	17484	1345710	0.01299	31.08599	4	3R_16563782_SNP	3R_16563782_SNP	FBgn0038821	CG17267	0	NON_SYNONYMOUS_CODING	44	58	205
3R_9799594_SNP	FBgn0264493	rdx	0	INTRON	114	146	205	4	3R_9799594_SNP	19994	1332444	0.01501	28.18081	1	2L_10609395_SNP	2L_10609395_SNP	FBgn0051721	Trim9	0	INTRON	38	50	205
3R_9854781_SNP	FBgn0264493	rdx	0	INTRON	17	27	205	4	3R_9854781_SNP	5071	1209672	0.00419	17.52119	2	2R_12222428_SNP	2R_12222428_SNP	FBgn0262511	Vha44	0	INTRON	54	68	205
X_15222737_SNP	FBgn0015926	dah	0	INTRON	14	16	205	5	X_15222737_SNP	3870	1175301	0.00329	14.99779	3	3L_10361376_SNP	3L_10361376_SNP	FBgn0265415	CR44327	820	DOWNSTREAM	10	11	205
X_15222738_SNP	FBgn0015926	dah	0	INTRON	14	16	205	5	X_15222738_SNP	3173	1171116	0.00271	16.72209	3	3L_2696351_SNP	3L_2696351_SNP	FBgn0264606	CG43955	0	INTRON	4	10	205
X_15224104_SNP	FBgn0015926	dah	0	INTRON	15	16	205	5	X_15224104_SNP	3568	1189597	0.00300	17.27972	3	3L_2696351_SNP	3L_2696351_SNP	FBgn0264606	CG43955	0	INTRON	4	10	205
X_15241431_SNP	FBgn0030631	CG6227	0	INTRON	13	14	205	5	X_15241431_SNP	5504	1165517	0.00472	14.99779	3	3L_10361376_SNP	3L_10361376_SNP	FBgn0265415	CR44327	820	DOWNSTREAM	10	11	205
X_15241432_SNP	FBgn0030631	CG6227	0	INTRON	12	13	205	5	X_15241432_SNP	6515	1143870	0.00570	25.46796	3	3L_10361376_SNP	3L_10361376_SNP	FBgn0265415	CR44327	820	DOWNSTREAM	10	11	205
X_15241453_SNP	FBgn0030631	CG6227	0	INTRON	14	15	205	5	X_15241453_SNP	4676	1182800	0.00395	14.99779	3	3L_10361376_SNP	3L_10361376_SNP	FBgn0265415	CR44327	820	DOWNSTREAM	10	11	205
X_20789813_SNP	FBgn0085387	shakB	0	INTRON	54	73	205	5	X_20789813_SNP	11040	1356871	0.00814	26.50464	2	2R_3608921_SNP	2R_3608921_SNP	FBgn0042135	CG18812	0	INTRON	23	30	205
X_22234030_SNP	FBgn0000719	fog	0	INTRON	113	151	205	5	X_22234030_SNP	18889	1339671	0.01410	32.35377	3	3L_2735462_SNP	3L_2735462_SNP	FBgn0052296	Mrtf	0	INTRON	63	83	205

## Sheet: EndDiastolicDiameter
1_ID	1_FlybaseID	1_GeneSymbol	1_Position	1_Type	1_NbOfLinesForMutationInEpistasis	1_NbOfLinesForMutationInDB	1_TotalNbOfLinesinDB	1_CHR	1_SNP	N_SIG	N_TOT	PROP	CHISQ	2_CHR	2_SNP	2_ID	2_FlybaseID	2_GeneSymbol	2_Position	2_Type	2_NbOfLinesForMutationInEpistasis	2_NbOfLinesForMutationInDB	2_TotalNbOfLinesinDB
2L_16504226_SNP	FBgn0032586	Tpr2	0	INTRON	23	28	205	1	2L_16504226_SNP	9802	1279967	0.00766	24.33460	3	3L_12639171_SNP	3L_12639171_SNP	FBgn0052111	CG32111	273	DOWNSTREAM	97	123	205
2L_16504330_SNP	FBgn0032586	Tpr2	0	INTRON	36	48	205	1	2L_16504330_SNP	9756	1333284	0.00732	23.62866	2	2R_16752213_SNP	2R_16752213_SNP	FBgn0034554	CG15227	0	INTRON	29	37	205
2L_5910346_SNP	FBgn0043362	bchs	0	INTRON	105	138	205	1	2L_5910346_SNP	21713	1335054	0.01626	31.23530	2	2R_15065294_SNP	2R_15065294_SNP	FBgn0034420	CG10737	430	DOWNSTREAM	84	112	205
2L_5910809_SNP	FBgn0043362	bchs	0	INTRON	41	50	205	1	2L_5910809_SNP	10734	1346730	0.00797	23.00396	4	3R_2992178_SNP	3R_2992178_SNP	FBgn0002306	sas	0	INTRON	118	149	205
2L_6458924_SNP	FBgn0031815	frj	0	UTR_3_PRIME	60	73	205	1	2L_6458924_SNP	14232	1359052	0.01047	29.68411	5	X_2780947_SNP	X_2780947_SNP	FBgn0028369	kirre	0	INTRON	27	32	205
2L_7901123_SNP	FBgn0085450	Snoo	0	INTRON	49	64	205	1	2L_7901123_SNP	13453	1349243	0.00997	29.39309	3	3L_14114981_SNP	3L_14114981_SNP	FBgn0042630	Sox21b	0	INTRON	43	54	205
2L_9571456_SNP	FBgn0032130	CG3838	0	INTRON	47	66	205	1	2L_9571456_SNP	15572	1351199	0.01152	25.41782	4	3R_4157655_SNP	3R_4157655_SNP	FBgn0003129	Poxm	0	INTRON	25	29	205
2R_10013626_SNP	FBgn0040752	Prosap	0	INTRON	108	143	205	2	2R_10013626_SNP	13736	1335329	0.01029	23.98205	2	2R_5135091_SNP	2R_5135091_SNP	FBgn0010114	hig	337	UPSTREAM	41	51	205
2R_10501277_SNP	FBgn0026427	Su(var)2-HP2	0	INTRON	34	49	205	2	2R_10501277_SNP	13524	1327822	0.01019	23.21077	1	2L_6273727_SNP	2L_6273727_SNP	FBgn0053531	Ddr	0	INTRON	28	38	205
2R_13339275_SNP	FBgn0028956	mthl3	0	INTRON	13	15	205	2	2R_13339275_SNP	20	1143487	0.00002	8.41745	4	3R_19685093_SNP	3R_19685093_SNP	FBgn0004185	snRNA:U1:95Ca	96	DOWNSTREAM	9	11	205
2R_13664692_SNP	FBgn0250851	CG33981	0	UTR_3_PRIME	76	100	205	2	2R_13664692_SNP	12767	1361429	0.00938	26.03586	4	3R_16817614_SNP	3R_16817614_SNP	FBgn0013995	Calx	0	INTRON	10	11	205
2R_17361262_SNP	FBgn0010415	Sdc	0	INTRON	12	14	205	2	2R_17361262_SNP	969	1086339	0.00089	13.15039	1	2L_8503992_SNP	2L_8503992_SNP	FBgn0032048	Dh31	0	INTRON	10	13	205
2R_6527959_SNP	FBgn0033538	CG11883	0	INTRON	29	37	205	2	2R_6527959_SNP	6854	1315311	0.00521	19.18730	4	3R_10900978_SNP	3R_10900978_SNP	FBgn0038282	dpr9	0	INTRON	127	164	205
2R_6641256_SNP	FBgn0053144	CG33144	0	INTRON	83	107	205	2	2R_6641256_SNP	18122	1361218	0.01331	26.59509	5	X_2574735_SNP	X_2574735_SNP	FBgn0011276	HLH3B	0	NON_SYNONYMOUS_CODING	53	65	205
3L_10867913_SNP	FBgn0026160	tna	167	DOWNSTREAM	36	50	205	3	3L_10867913_SNP	12779	1337505	0.00955	25.17720	2	2R_7041422_SNP	2R_7041422_SNP	FBgn0033579	CG13229	0	INTRON	34	41	205
3L_11508282_SNP	FBgn0036168	CG7512	0	INTRON	10	12	205	3	3L_11508282_SNP	2303	1076532	0.00214	14.47072	5	X_9558707_SNP	X_9558707_SNP	FBgn0261617	nej	768	DOWNSTREAM	44	64	205
3L_12328810_SNP	FBgn0052105	CG32105	0	UTR_3_PRIME	142	186	205	3	3L_12328810_SNP	78	1193636	0.00007	10.76562	1	2L_8913833_SNP	2L_8913833_SNP	FBgn0085427	CG34398	0	INTRON	7	10	205
3L_17185380_SNP	FBgn0260943	Rbp6	0	INTRON	54	63	205	3	3L_17185380_SNP	11635	1355387	0.00858	21.69111	5	X_17452135_SNP	X_17452135_SNP	FBgn0263706	CG43658	0	INTRON	23	33	205
3L_17185395_SNP	FBgn0260943	Rbp6	0	INTRON	53	63	205	3	3L_17185395_SNP	11487	1354797	0.00848	22.03864	3	3L_12401878_SNP	3L_12401878_SNP	FBgn0052103	CG32103	0	INTRON	79	102	205
3L_17933046_SNP	FBgn0262793	CG43174	0	INTRON	8	12	205	3	3L_17933046_SNP	40	1008055	0.00004	8.23924	4	3R_15179483_SNP	3R_15179483_SNP	FBgn0262839	CG43203	290	UPSTREAM	27	33	205
3L_2708945_SNP	FBgn0264606	CG43955	0	INTRON	30	40	205	3	3L_2708945_SNP	8168	1316164	0.00621	29.01048	1	2L_3744120_SNP	2L_3744120_SNP	FBgn0031568	CG10019	0	INTRON	137	177	205
3L_2710597_SNP	FBgn0264606	CG43955	0	INTRON	37	51	205	3	3L_2710597_SNP	11142	1336952	0.00833	25.50797	1	2L_3744120_SNP	2L_3744120_SNP	FBgn0031568	CG10019	0	INTRON	137	177	205
3L_3438403_SNP	FBgn0026259	eIF5B	0	INTRON	98	122	205	3	3L_3438403_SNP	15452	1357455	0.01138	22.84583	4	3R_3618967_SNP	3R_3618967_SNP	FBgn0037517	CG10086	0	UTR_3_PRIME	37	48	205
3L_4719102_SNP	FBgn0035574	Gef64C	0	INTRON	91	120	205	3	3L_4719102_SNP	17857	1359632	0.01313	25.78173	4	3R_2130859_SNP	3R_2130859_SNP	FBgn0051561	Osi16	110	UPSTREAM	126	167	205
3L_8159211_SNP	FBgn0035845	CG13675	593	UPSTREAM	10	10	205	3	3L_8159211_SNP	994	1079845	0.00092	12.23945	1	2L_9882207_SNP	2L_9882207_SNP	FBgn0032151	nAcRalpha-30D	0	INTRON	5	10	205
3L_8159242_SNP	FBgn0035845	CG13675	624	UPSTREAM	10	10	205	3	3L_8159242_SNP	10636	1070668	0.00993	14.91880	3	3L_7781801_SNP	3L_7781801_SNP	FBgn0052369	CG32369	0	INTRON	148	193	205
3L_8302277_SNP	FBgn0035871	BI-1	236	UPSTREAM	10	12	205	3	3L_8302277_SNP	10	1062400	0.00001	8.40837	4	3R_15626763_SNP	3R_15626763_SNP	FBgn0014135	bnl	0	INTRON	10	15	205
3L_8859886_SNP	FBgn0263930	dally	0	INTRON	25	31	205	3	3L_8859886_SNP	4849	1299298	0.00373	20.37298	1	2L_3744120_SNP	2L_3744120_SNP	FBgn0031568	CG10019	0	INTRON	137	177	205
3R_10646290_SNP	FBgn0264754	btsz	0	INTRON	89	118	205	4	3R_10646290_SNP	20243	1355853	0.01493	25.27187	1	2L_2807139_SNP	2L_2807139_SNP	FBgn0031461	daw	0	INTRON	7	12	205
3R_18262633_SNP	FBgn0038967	CG13847	761	UPSTREAM	38	51	205	4	3R_18262633_SNP	11665	1337070	0.00872	33.09052	2	2R_13702856_SNP	2R_13702856_SNP	FBgn0259211	grh	0	INTRON	47	69	205
3R_18262745_SNP	FBgn0038967	CG13847	873	UPSTREAM	82	105	205	4	3R_18262745_SNP	11852	1356865	0.00873	22.32594	2	2R_20487376_SNP	2R_20487376_SNP	FBgn0035032	CG4692	32	UPSTREAM	134	173	205
3R_21504465_SNP	FBgn0039356	CG5039	0	START_GAINED	37	49	205	4	3R_21504465_SNP	18917	1335738	0.01416	28.96271	4	3R_12250698_SNP	3R_12250698_SNP	FBgn0051497	tRNA:CR31497	11	DOWNSTREAM	73	94	205
3R_22909747_SNP	FBgn0039480	Cpr97Ea	0	NON_SYNONYMOUS_CODING	15	21	205	4	3R_22909747_SNP	450	1207694	0.00037	15.08883	5	X_2581591_SNP	X_2581591_SNP	FBgn0003068	per	0	INTRON	7	10	205
3R_4153850_SNP	FBgn0003129	Poxm	0	INTRON	33	41	205	4	3R_4153850_SNP	25771	1327422	0.01941	26.94444	3	3L_7426814_SNP	3L_7426814_SNP	FBgn0259935	CG42458	0	INTRON	34	47	205
3R_4531462_SNP	FBgn0037612	CG8112	0	INTRON	55	75	205	4	3R_4531462_SNP	12966	1356538	0.00956	32.55428	4	3R_25001375_SNP	3R_25001375_SNP	FBgn0039647	CG14509	0	INTRON	66	81	205
3R_5947278_SNP	FBgn0037789	CG6208	156	UPSTREAM	41	54	205	4	3R_5947278_SNP	11032	1343317	0.00821	22.08335	3	3L_23009702_SNP	3L_23009702_SNP	FBgn0262509	nrm	0	INTRON	26	36	205
3R_6201449_SNP	FBgn0020379	Rfx	0	INTRON	18	28	205	4	3R_6201449_SNP	2401	1197541	0.00200	18.58037	4	3R_21922483_SNP	3R_21922483_SNP	FBgn0039411	dys	0	INTRON	52	67	205
3R_9799420_SNP	FBgn0264493	rdx	0	INTRON	85	115	205	4	3R_9799420_SNP	17058	1356726	0.01257	26.21906	4	3R_18274944_SNP	3R_18274944_SNP	FBgn0085405	CG34376	0	INTRON	30	36	205
3R_9799433_SNP	FBgn0264493	rdx	0	INTRON	69	96	205	4	3R_9799433_SNP	17176	1360257	0.01263	25.22192	1	2L_2348632_SNP	2L_2348632_SNP	FBgn0031414	eys	0	INTRON	31	40	205
3R_9799511_SNP	FBgn0264493	rdx	0	INTRON	100	129	205	4	3R_9799511_SNP	12729	1348338	0.00944	25.60772	4	3R_19308215_SNP	3R_19308215_SNP	FBgn0051225	Ir94f	0	NON_SYNONYMOUS_CODING	63	84	205
3R_9799594_SNP	FBgn0264493	rdx	0	INTRON	117	146	205	4	3R_9799594_SNP	5916	1334460	0.00443	21.01536	4	3R_16563782_SNP	3R_16563782_SNP	FBgn0038821	CG17267	0	NON_SYNONYMOUS_CODING	44	58	205
3R_9854781_SNP	FBgn0264493	rdx	0	INTRON	17	27	205	4	3R_9854781_SNP	616	1209675	0.00051	12.91521	3	3L_22606811_SNP	3L_22606811_SNP	FBgn0037171	CG14459	0	INTRON	7	10	205
X_15214154_SNP	FBgn0004924	Top1	0	INTRON	21	27	205	5	X_15214154_SNP	2584	1267206	0.00204	14.16236	4	3R_6137046_SNP	3R_6137046_SNP	FBgn0037807	CG6293	0	INTRON	8	12	205
X_19645981_SNP	FBgn0031069	Pmp70	0	INTRON	58	71	205	5	X_19645981_SNP	18790	1359115	0.01383	27.24868	3	3L_16289232_SNP	3L_16289232_SNP	FBgn0036597	CG4962	585	UPSTREAM	96	123	205
X_19646015_SNP	FBgn0031069	Pmp70	0	INTRON	50	64	205	5	X_19646015_SNP	22520	1354399	0.01663	26.47812	1	2L_9143557_SNP	2L_9143557_SNP	FBgn0052982	CG32982	0	INTRON	40	48	205
X_22233916_SNP	FBgn0000719	fog	0	INTRON	112	144	205	5	X_22233916_SNP	10085	1344056	0.00750	21.48131	3	3L_22329387_SNP	3L_22329387_SNP	FBgn0004449	Ten-m	0	INTRON	132	167	205
X_2769163_SNP	FBgn0028369	kirre	0	INTRON	45	61	205	5	X_2769163_SNP	14890	1350785	0.01102	29.12536	5	X_17387213_SNP	X_17387213_SNP	FBgn0263706	CG43658	0	INTRON	32	40	205
X_3607392_SNP	FBgn0015286	Rala	0	INTRON	17	23	205	5	X_3607392_SNP	5180	1231219	0.00421	18.87330	1	2L_16787708_SNP	2L_16787708_SNP	FBgn0264695	Mhc	0	INTRON	8	12	205
X_3613994_SNP	FBgn0086899	tlk	46	UPSTREAM	21	25	205	5	X_3613994_SNP	3112	1268736	0.00245	13.89117	5	X_15819726_SNP	X_15819726_SNP	FBgn0010240	Lcch3	0	INTRON	6	11	205
X_3614191_SNP	FBgn0086899	tlk	0	INTRON	20	24	205	5	X_3614191_SNP	4631	1253144	0.00370	14.51817	4	3R_24951516_SNP	3R_24951516_SNP	FBgn0039637	CG11880	0	INTRON	122	157	205
X_3729381_SNP	FBgn0000542	ec	0	INTRON	30	41	205	5	X_3729381_SNP	10365	1313144	0.00789	23.19128	2	2R_10820304_SNP	2R_10820304_SNP	FBgn0033983	CG10253	0	INTRON	53	67	205
X_5226493_SNP	FBgn0026751	XRCC1	25	DOWNSTREAM	56	77	205	5	X_5226493_SNP	18614	1355155	0.01374	24.35620	4	3R_13928300_SNP	3R_13928300_SNP	FBgn0003499	sr	0	INTRON	94	127	205

## Sheet: DiastolicInterval
1_ID	1_FlybaseID	1_GeneSymbol	1_Position	1_Type	1_NbOfLinesForMutationInEpistasis	1_NbOfLinesForMutationInDB	1_TotalNbOfLinesinDB	1_CHR	1_SNP	N_SIG	N_TOT	PROP	CHISQ	2_CHR	2_SNP	2_ID	2_FlybaseID	2_GeneSymbol	2_Position	2_Type	2_NbOfLinesForMutationInEpistasis	2_NbOfLinesForMutationInDB	2_TotalNbOfLinesinDB
2L_12190653_SNP	FBgn0000114	aret	0	INTRON	28	35	205	1	2L_12190653_SNP	1380	1305912	0.00106	15.08291	2	2R_9980917_SNP	2R_9980917_SNP	FBgn0040752	Prosap	0	INTRON	27	35	205
2L_12190660_SNP	FBgn0000114	aret	0	INTRON	31	38	205	1	2L_12190660_SNP	1682	1315268	0.00128	16.46971	2	2R_9980917_SNP	2R_9980917_SNP	FBgn0040752	Prosap	0	INTRON	27	35	205
2L_12190664_SNP	FBgn0000114	aret	0	INTRON	32	39	205	1	2L_12190664_SNP	3651	1318911	0.00277	19.06298	4	3R_15822395_SNP	3R_15822395_SNP	FBgn0038755	Hs6st	0	INTRON	25	33	205
2L_12190669_SNP	FBgn0000114	aret	0	INTRON	30	37	205	1	2L_12190669_SNP	3819	1311280	0.00291	19.28163	4	3R_15822395_SNP	3R_15822395_SNP	FBgn0038755	Hs6st	0	INTRON	25	33	205
2L_12190670_SNP	FBgn0000114	aret	0	INTRON	32	39	205	1	2L_12190670_SNP	3589	1318919	0.00272	19.99909	4	3R_15822395_SNP	3R_15822395_SNP	FBgn0038755	Hs6st	0	INTRON	25	33	205
2L_14222249_SNP	FBgn0016930	smi35A	0	INTRON	47	59	205	1	2L_14222249_SNP	6723	1349908	0.00498	19.73234	5	X_9932575_SNP	X_9932575_SNP	FBgn0263132	Cht6	0	INTRON	18	19	205
2L_16625000_SNP	FBgn0259735	CG42389	0	INTRON	21	32	205	1	2L_16625000_SNP	3710	1268402	0.00292	15.65146	5	X_12401367_SNP	X_12401367_SNP	FBgn0030396	CG2556	0	INTRON	57	70	205
2L_19694078_SNP	FBgn0000464	Lar	0	INTRON	18	25	205	1	2L_19694078_SNP	25454	1251413	0.02034	27.73227	3	3L_9640276_SNP	3L_9640276_SNP	FBgn0053696	CG33696	0	INTRON	101	131	205
2L_22124530_SNP	FBgn0032974	CG3651	0	INTRON	36	45	205	1	2L_22124530_SNP	14003	1335265	0.01049	25.01983	1	2L_2110242_SNP	2L_2110242_SNP	FBgn0053516	dpr3	364	UPSTREAM	13	15	205
2L_22130022_SNP	FBgn0025674	CycK	0	INTRON	50	60	205	1	2L_22130022_SNP	17131	1353943	0.01265	32.88998	1	2L_16871780_SNP	2L_16871780_SNP	FBgn0051781	CR31781	0	INTRON	23	29	205
2L_22130620_SNP	FBgn0262885	CR43240	406	DOWNSTREAM	40	48	205	1	2L_22130620_SNP	12102	1342371	0.00902	24.00277	1	2L_7122819_SNP	2L_7122819_SNP	FBgn0085407	Pvf3	0	INTRON	35	50	205
2L_22130717_SNP	FBgn0262885	CR43240	309	DOWNSTREAM	53	63	205	1	2L_22130717_SNP	15118	1355783	0.01115	32.63362	5	X_6514049_SNP	X_6514049_SNP	FBgn0029881	pigs	0	INTRON	22	28	205
2L_22130776_SNP	FBgn0262885	CR43240	250	DOWNSTREAM	45	54	205	1	2L_22130776_SNP	13256	1349213	0.00982	33.61192	3	3L_4670036_SNP	3L_4670036_SNP	FBgn0262870	axo	0	INTRON	75	87	205
2L_22131583_SNP	FBgn0261802	CG42748	0	UTR_5_PRIME	53	63	205	1	2L_22131583_SNP	15754	1355928	0.01162	34.84804	1	2L_16871780_SNP	2L_16871780_SNP	FBgn0051781	CR31781	0	INTRON	23	29	205
2L_22132871_SNP	FBgn0261802	CG42748	0	INTRON	44	52	205	1	2L_22132871_SNP	13947	1348524	0.01034	25.01319	5	X_604704_SNP	X_604704_SNP	FBgn0021764	sdk	0	INTRON	32	39	205
2L_22133171_SNP	FBgn0261802	CG42748	0	INTRON	45	53	205	1	2L_22133171_SNP	14007	1349373	0.01038	22.67989	5	X_604704_SNP	X_604704_SNP	FBgn0021764	sdk	0	INTRON	32	39	205
2L_5641693_SNP	FBgn0051646	CG31646	0	INTRON	116	150	205	1	2L_5641693_SNP	8920	1327717	0.00672	22.72209	2	2R_6380330_SNP	2R_6380330_SNP	FBgn0005630	lola	0	INTRON	118	147	205
2L_8355912_SNP	FBgn0032026	CG7627	0	UTR_3_PRIME	15	18	205	1	2L_8355912_SNP	3114	1182812	0.00263	14.21853	5	X_6132696_SNP	X_6132696_SNP	FBgn0029851	CG14445	0	INTRON	11	11	205
2L_8364685_SNP	FBgn0010265	RpS13	76	UPSTREAM	10	13	205	1	2L_8364685_SNP	1402	1051015	0.00133	12.62725	1	2L_5215284_SNP	2L_5215284_SNP	FBgn0250847	CG14034	0	STOP_LOST	9	12	205
2R_10814415_SNP	FBgn0027596	CG10249	0	INTRON	105	144	205	2	2R_10814415_SNP	17718	1350175	0.01312	29.54874	4	3R_10516073_SNP	3R_10516073_SNP	FBgn0265140	Meltrin	0	INTRON	34	42	205
2R_16547473_SNP	FBgn0034540	Lrt	0	NON_SYNONYMOUS_CODING	61	78	205	2	2R_16547473_SNP	19008	1359864	0.01398	31.36740	5	X_12111468_SNP	X_12111468_SNP	FBgn0259240	Ten-a	0	INTRON	12	14	205
2R_1738786_SNP	FBgn0085414	dpr12	0	INTRON	11	13	205	2	2R_1738786_SNP	3489	1109478	0.00314	14.87423	2	2R_2856804_SNP	2R_2856804_SNP	FBgn0066292	CheB42c	0	INTRON	46	56	205
2R_17559522_SNP	FBgn0034651	CG15676	0	NON_SYNONYMOUS_CODING	8	12	205	2	2R_17559522_SNP	21349	993552	0.02149	15.62737	4	3R_26038443_SNP	3R_26038443_SNP	FBgn0000277	CecA2	153	DOWNSTREAM	16	20	205
2R_17559527_SNP	FBgn0034651	CG15676	0	NON_SYNONYMOUS_CODING	9	13	205	2	2R_17559527_SNP	18101	1033519	0.01751	15.62737	4	3R_26038443_SNP	3R_26038443_SNP	FBgn0000277	CecA2	153	DOWNSTREAM	16	20	205
2R_19841629_SNP	FBgn0034939	thoc5	0	UTR_5_PRIME	16	19	205	2	2R_19841629_SNP	972	1212585	0.00080	15.13495	3	3L_16454189_SNP	3L_16454189_SNP	FBgn0053158	CG33158	0	INTRON	72	88	205
2R_19841683_SNP	FBgn0034939	thoc5	0	UTR_5_PRIME	17	18	205	2	2R_19841683_SNP	5728	1230664	0.00465	17.98854	3	3L_12047205_SNP	3L_12047205_SNP	FBgn0041096	rols	0	INTRON	9	10	205
2R_2959324_SNP	FBgn0050299	tRNA:CR30299	986	UPSTREAM	37	50	205	2	2R_2959324_SNP	10269	1339289	0.00767	24.32798	2	2R_8550219_SNP	2R_8550219_SNP	FBgn0261673	nemy	0	INTRON	109	144	205
2R_3269620_SNP	FBgn0000352	cos	61	DOWNSTREAM	25	37	205	2	2R_3269620_SNP	26365	1287311	0.02048	35.16699	3	3L_2123154_SNP	3L_2123154_SNP	FBgn0052311	zormin	0	INTRON	101	131	205
3L_10807909_SNP	FBgn0262020	CG42831	10	UPSTREAM	106	139	205	3	3L_10807909_SNP	8215	1350200	0.00608	21.32629	1	2L_19430305_SNP	2L_19430305_SNP	FBgn0032780	CG13085	35	DOWNSTREAM	78	97	205
3L_16487772_SNP	FBgn0263131	CG43373	0	INTRON	9	15	205	3	3L_16487772_SNP	15	1060770	0.00001	9.96056	5	X_17947930_SNP	X_17947930_SNP	FBgn0003380	Sh	0	INTRON	10	15	205
3L_7143915_SNP	FBgn0259173	corn	0	INTRON	19	25	205	3	3L_7143915_SNP	9508	1252545	0.00759	21.77269	1	2L_10105019_SNP	2L_10105019_SNP	FBgn0265002	CG44153	0	INTRON	10	12	205
3L_7143920_SNP	FBgn0259173	corn	0	INTRON	19	24	205	3	3L_7143920_SNP	11293	1252542	0.00902	22.80661	1	2L_10105019_SNP	2L_10105019_SNP	FBgn0265002	CG44153	0	INTRON	10	12	205
3L_8898332_SNP	FBgn0035934	TrpA1	442	UPSTREAM	8	8	205	3	3L_8898332_SNP	14	1041349	0.00001	7.65930	4	3R_14106047_SNP	3R_14106047_SNP	FBgn0026250	eIF-1A	0	INTRON	29	36	205
3L_9173690_SNP	FBgn0004244	Rdl	0	INTRON	47	62	205	3	3L_9173690_SNP	10085	1352241	0.00746	31.53094	1	2L_15925050_SNP	2L_15925050_SNP	FBgn0028645	beat-Ib	0	INTRON	10	14	205
3R_10116797_SNP	FBgn0038220	CG12207	0	INTRON	24	34	205	4	3R_10116797_SNP	13414	1281389	0.01047	22.94745	5	X_12835494_SNP	X_12835494_SNP	FBgn0086675	fne	0	INTRON	73	91	205
3R_17357063_SNP	FBgn0263130	CR43372	0	EXON	23	32	205	4	3R_17357063_SNP	25247	1284724	0.01965	29.89783	3	3L_16512939_SNP	3L_16512939_SNP	FBgn0263131	CG43373	0	INTRON	58	68	205
3R_17842029_SNP	FBgn0038922	CG6439	84	DOWNSTREAM	59	71	205	4	3R_17842029_SNP	25975	1355681	0.01916	30.65953	4	3R_9990842_SNP	3R_9990842_SNP	FBgn0011582	DopR	259	DOWNSTREAM	89	118	205
3R_25686042_SNP	FBgn0039712	CG15514	0	UTR_3_PRIME	12	16	205	4	3R_25686042_SNP	32	1144951	0.00003	9.39565	4	3R_22177974_SNP	3R_22177974_SNP	FBgn0053970	CG33970	0	INTRON	11	11	205
3R_3017082_SNP	FBgn0086372	lap	0	INTRON	137	177	205	4	3R_3017082_SNP	1323	1154498	0.00115	16.89671	1	2L_12301196_SNP	2L_12301196_SNP	FBgn0000114	aret	0	INTRON	64	79	205
3R_3151448_SNP	FBgn0265423	CG44335	0	UTR_5_PRIME	132	165	205	4	3R_3151448_SNP	3920	1182536	0.00331	18.32580	3	3L_2422499_SNP	3L_2422499_SNP	FBgn0261551	CG42669	0	INTRON	33	43	205
3R_6186975_SNP	FBgn0015396	jumu	0	UTR_3_PRIME	90	116	205	4	3R_6186975_SNP	14767	1354754	0.01090	21.15278	3	3L_11995438_SNP	3L_11995438_SNP	FBgn0036239	Pop2	0	INTRON	21	32	205
X_11076658_SNP	FBgn0030278	CG15200	306	UPSTREAM	15	17	205	5	X_11076658_SNP	3978	1165613	0.00341	15.15499	2	2R_15549851_SNP	2R_15549851_SNP	FBgn0034464	CG11018	90	UPSTREAM	78	98	205
X_11076679_SNP	FBgn0030278	CG15200	285	UPSTREAM	88	111	205	5	X_11076679_SNP	45059	1360383	0.03312	36.51027	1	2L_11841696_SNP	2L_11841696_SNP	FBgn0264815	Pde1c	0	INTRON	28	36	205
X_11076749_SNP	FBgn0030278	CG15200	215	UPSTREAM	83	104	205	5	X_11076749_SNP	37579	1361154	0.02761	32.85788	1	2L_10296600_SNP	2L_10296600_SNP	FBgn0032210	CYLD	0	INTRON	18	21	205
X_19076168_SNP	FBgn0030991	CG7453	111	DOWNSTREAM	81	107	205	5	X_19076168_SNP	12192	1358841	0.00897	35.25863	5	X_12768325_SNP	X_12768325_SNP	FBgn0259171	Pde9	0	INTRON	95	125	205
X_19113826_SNP	FBgn0031001	CG7884	829	UPSTREAM	20	27	205	5	X_19113826_SNP	11033	1251424	0.00882	25.74963	2	2R_17269996_SNP	2R_17269996_SNP	FBgn0034626	CG10795	736	DOWNSTREAM	49	58	205
X_20323130_SNP	FBgn0052506	CG32506	0	INTRON	88	117	205	5	X_20323130_SNP	19639	1361366	0.01443	28.36155	2	2R_8615921_SNP	2R_8615921_SNP	FBgn0261545	CG42663	0	INTRON	49	64	205
X_20323144_SNP	FBgn0052506	CG32506	0	INTRON	85	112	205	5	X_20323144_SNP	23208	1361395	0.01705	23.95753	3	3L_14861332_SNP	3L_14861332_SNP	FBgn0036454	CG17839	527	DOWNSTREAM	26	28	205
X_20323165_SNP	FBgn0052506	CG32506	0	INTRON	86	113	205	5	X_20323165_SNP	23926	1361494	0.01757	24.08867	4	3R_25143244_SNP	3R_25143244_SNP	FBgn0015622	Cnx99A	0	INTRON	10	12	205
X_20369946_SNP	FBgn0031118	RhoGAP19D	0	INTRON	11	14	205	5	X_20369946_SNP	948	1095849	0.00087	12.89090	3	3L_3027466_SNP	3L_3027466_SNP	FBgn0004372	aly	945	UPSTREAM	70	93	205
X_20420863_SNP	FBgn0259162	RunxB	0	INTRON	15	21	205	5	X_20420863_SNP	17888	1187843	0.01506	21.48405	2	2R_9489105_SNP	2R_9489105_SNP	FBgn0262360	CG43058	588	UPSTREAM	16	25	205
X_20420870_SNP	FBgn0259162	RunxB	0	INTRON	15	22	205	5	X_20420870_SNP	17888	1187843	0.01506	21.48405	2	2R_9489105_SNP	2R_9489105_SNP	FBgn0262360	CG43058	588	UPSTREAM	16	25	205
X_20420879_SNP	FBgn0259162	RunxB	0	INTRON	14	21	205	5	X_20420879_SNP	18641	1168834	0.01595	21.48405	2	2R_9489105_SNP	2R_9489105_SNP	FBgn0262360	CG43058	588	UPSTREAM	16	25	205
X_20430870_SNP	FBgn0259162	RunxB	0	INTRON	6	9	205	5	X_20430870_SNP	105	883774	0.00012	10.74988	3	3L_23589950_SNP	3L_23589950_SNP	FBgn0250816	AGO3	0	INTRON	26	32	205
X_6485901_SNP	FBgn0029878	Pat1	0	INTRON	76	101	205	5	X_6485901_SNP	14832	1361667	0.01089	29.42484	2	2R_13432723_SNP	2R_13432723_SNP	FBgn0028382	cyp33	2	UPSTREAM	25	36	205

## Sheet: SystolicIntervals
1_ID	1_FlybaseID	1_GeneSymbol	1_Position	1_Type	1_NbOfLinesForMutationInEpistasis	1_NbOfLinesForMutationInDB	1_TotalNbOfLinesinDB	1_CHR	1_SNP	N_SIG	N_TOT	PROP	CHISQ	2_CHR	2_SNP	2_ID	2_FlybaseID	2_GeneSymbol	2_Position	2_Type	2_NbOfLinesForMutationInEpistasis	2_NbOfLinesForMutationInDB	2_TotalNbOfLinesinDB
2L_13724029_SNP	FBgn0028847	CG9014	387	UPSTREAM	9	9	205	1	2L_13724029_SNP	15	1045324	0.00001	8.93766	3	3L_2628038_SNP	3L_2628038_SNP	FBgn0011828	Pxn	0	INTRON	7	10	205
2L_2166489_SNP	FBgn0000097	aop	0	INTRON	20	25	205	1	2L_2166489_SNP	44181	1246234	0.03545	27.68483	2	2R_4841314_SNP	2R_4841314_SNP	FBgn0011300	babo	0	INTRON	9	10	205
2L_3894049_SNP	FBgn0000256	capu	0	INTRON	16	19	205	1	2L_3894049_SNP	2476	1196898	0.00207	17.66677	1	2L_12494207_SNP	2L_12494207_SNP	FBgn0259176	bun	0	INTRON	9	11	205
2L_4521383_SNP	FBgn0053196	dp	0	INTRON	96	120	205	1	2L_4521383_SNP	23819	1347268	0.01768	34.68190	2	2R_9127451_SNP	2R_9127451_SNP	FBgn0033817	GstE14	0	INTRON	28	33	205
2L_6263534_SNP	FBgn0053531	Ddr	0	INTRON	42	55	205	1	2L_6263534_SNP	7662	1346334	0.00569	19.05930	1	2L_10154649_SNP	2L_10154649_SNP	FBgn0265002	CG44153	0	INTRON	9	17	205
2L_7156389_SNP	FBgn0085407	Pvf3	0	NON_SYNONYMOUS_CODING	32	40	205	1	2L_7156389_SNP	7702	1322015	0.00583	19.98340	3	3L_7282937_SNP	3L_7282937_SNP	FBgn0035756	unc-13-4A	0	INTRON	25	34	205
2R_12387530_SNP	FBgn0011260	Sema-2a	171	UPSTREAM	14	15	205	2	2R_12387530_SNP	5009	1122634	0.00446	16.14816	5	X_10010361_SNP	X_10010361_SNP	FBgn0083940	CG34104	0	INTRON	58	67	205
2R_13390703_SNP	FBgn0262720	CG43164	0	INTRON	45	52	205	2	2R_13390703_SNP	15148	1348528	0.01123	26.72457	1	2L_18545199_SNP	2L_18545199_SNP	FBgn0085370	Pde11	0	INTRON	30	34	205
2R_13390790_SNP	FBgn0262720	CG43164	0	INTRON	53	65	205	2	2R_13390790_SNP	10196	1355698	0.00752	23.10607	3	3L_12133735_SNP	3L_12133735_SNP	FBgn0036257	RhoGAP68F	0	INTRON	102	131	205
2R_5814173_SNP	FBgn0011656	Mef2	0	INTRON	27	31	205	2	2R_5814173_SNP	3749	1296977	0.00289	18.26169	3	3L_11116220_SNP	3L_11116220_SNP	FBgn0036136	Ufd1-like	0	UTR_5_PRIME	53	65	205
2R_7899173_SNP	FBgn0004839	otk	0	INTRON	97	120	205	2	2R_7899173_SNP	13388	1359619	0.00985	24.70420	1	2L_3764381_SNP	2L_3764381_SNP	FBgn0263846	CG43707	0	NON_SYNONYMOUS_CODING	111	137	205
2R_7931533_SNP	FBgn0024732	Drep-1	584	UPSTREAM	49	62	205	2	2R_7931533_SNP	21856	1353149	0.01615	29.93738	1	2L_3174853_SNP	2L_3174853_SNP	FBgn0085422	CG34393	259	DOWNSTREAM	107	133	205
2R_7931534_SNP	FBgn0024732	Drep-1	583	UPSTREAM	49	60	205	2	2R_7931534_SNP	22189	1353154	0.01640	29.93738	1	2L_3174853_SNP	2L_3174853_SNP	FBgn0085422	CG34393	259	DOWNSTREAM	107	133	205
2R_7935363_SNP	FBgn0024732	Drep-1	0	INTRON	55	71	205	2	2R_7935363_SNP	23543	1357209	0.01735	30.26225	3	3L_2396040_SNP	3L_2396040_SNP	FBgn0035338	CG13800	0	INTRON	11	12	205
2R_7935448_SNP	FBgn0024732	Drep-1	0	INTRON	64	80	205	2	2R_7935448_SNP	18191	1359998	0.01338	28.79181	3	3L_17104665_SNP	3L_17104665_SNP	FBgn0260943	Rbp6	0	INTRON	83	98	205
2R_7937937_SNP	FBgn0024732	Drep-1	260	DOWNSTREAM	66	82	205	2	2R_7937937_SNP	19948	1360670	0.01466	27.37096	1	2L_1289198_SNP	2L_1289198_SNP	FBgn0041097	robo3	0	INTRON	25	31	205
2R_7938579_SNP	FBgn0050039	CG30039	0	UTR_3_PRIME	50	63	205	2	2R_7938579_SNP	22650	1353425	0.01674	28.43583	2	2R_13772127_SNP	2R_13772127_SNP	FBgn0011589	elk	0	INTRON	15	21	205
2R_7939269_SNP	FBgn0050039	CG30039	9	UPSTREAM	55	70	205	2	2R_7939269_SNP	26374	1357419	0.01943	33.07555	3	3L_2396040_SNP	3L_2396040_SNP	FBgn0035338	CG13800	0	INTRON	11	12	205
2R_7939276_SNP	FBgn0050039	CG30039	16	UPSTREAM	55	70	205	2	2R_7939276_SNP	27051	1357314	0.01993	32.89967	3	3L_2396040_SNP	3L_2396040_SNP	FBgn0035338	CG13800	0	INTRON	11	12	205
2R_7939311_SNP	FBgn0050039	CG30039	51	UPSTREAM	32	38	205	2	2R_7939311_SNP	28597	1325409	0.02158	26.46696	1	2L_10546602_SNP	2L_10546602_SNP	FBgn0051721	Trim9	0	INTRON	76	94	205
2R_7939468_SNP	FBgn0050039	CG30039	208	UPSTREAM	42	53	205	2	2R_7939468_SNP	35310	1346616	0.02622	39.40511	3	3L_4755765_SNP	3L_4755765_SNP	FBgn0264473	CR43881	0	EXON	45	54	205
2R_7939816_SNP	FBgn0050039	CG30039	556	UPSTREAM	66	81	205	2	2R_7939816_SNP	18273	1360642	0.01343	33.45339	3	3L_4755765_SNP	3L_4755765_SNP	FBgn0264473	CR43881	0	EXON	45	54	205
2R_7941989_SNP	FBgn0265373	CG44314	0	INTRON	48	62	205	2	2R_7941989_SNP	31840	1351871	0.02355	37.58211	2	2R_17161204_SNP	2R_17161204_SNP	FBgn0085426	Rgk3	0	INTRON	97	115	205
2R_7944643_SNP	FBgn0028407	Drep-3	0	INTRON	47	58	205	2	2R_7944643_SNP	31523	1350782	0.02334	27.91927	3	3L_2401257_SNP	3L_2401257_SNP	FBgn0035338	CG13800	0	INTRON	144	181	205
2R_7982297_SNP	FBgn0086677	jeb	0	INTRON	82	110	205	2	2R_7982297_SNP	13099	1361104	0.00962	24.00344	3	3L_12843440_SNP	3L_12843440_SNP	FBgn0036318	Wbp2	0	INTRON	49	57	205
3L_10856010_SNP	FBgn0026160	tna	0	INTRON	132	164	205	3	3L_10856010_SNP	21694	1303433	0.01664	27.10374	3	3L_18092675_SNP	3L_18092675_SNP	FBgn0036773	CG13698	0	INTRON	51	66	205
3L_10856061_SNP	FBgn0026160	tna	0	INTRON	122	150	205	3	3L_10856061_SNP	20981	1342560	0.01563	24.51846	1	2L_3104151_SNP	2L_3104151_SNP	FBgn0015600	toc	0	INTRON	18	23	205
3L_10856090_SNP	FBgn0026160	tna	0	INTRON	125	155	205	3	3L_10856090_SNP	19811	1339441	0.01479	23.50478	3	3L_12636052_SNP	3L_12636052_SNP	FBgn0052111	CG32111	0	INTRON	37	43	205
3L_10856100_SNP	FBgn0026160	tna	0	INTRON	131	163	205	3	3L_10856100_SNP	20658	1318443	0.01567	23.93049	4	3R_9047217_SNP	3R_9047217_SNP	FBgn0038127	CG8476	917	UPSTREAM	33	47	205
3L_10893212_SNP	FBgn0036111	Aps	989	UPSTREAM	85	99	205	3	3L_10893212_SNP	15369	1362059	0.01128	23.07635	2	2R_13679976_SNP	2R_13679976_SNP	FBgn0028744	CG5033	23	DOWNSTREAM	12	16	205
3L_15905376_SNP	FBgn0036544	sff	0	INTRON	44	52	205	3	3L_15905376_SNP	23519	1345838	0.01748	30.90055	5	X_12577997_SNP	X_12577997_SNP	FBgn0263865	Smr	239	DOWNSTREAM	25	31	205
3L_1652965_SNP	FBgn0035252	CG7970	40	UPSTREAM	19	23	205	3	3L_1652965_SNP	32001	1226554	0.02609	23.45320	1	2L_3919944_SNP	2L_3919944_SNP	FBgn0051774	fred	0	INTRON	34	43	205
3L_18654105_SNP	FBgn0036801	MYPT-75D	0	INTRON	71	89	205	3	3L_18654105_SNP	19285	1361447	0.01417	25.88241	2	2R_10436345_SNP	2R_10436345_SNP	FBgn0020245	ttv	0	INTRON	44	60	205
3L_22167574_SNP	FBgn0037153	olf413	0	INTRON	74	93	205	3	3L_22167574_SNP	15802	1360129	0.01162	37.03343	2	2R_127410_SNP	2R_127410_SNP	FBgn0262117	IntS3	0	INTRON	21	23	205
3L_22283409_SNP	FBgn0027086	Aats-ile	0	INTRON	11	14	205	3	3L_22283409_SNP	9774	1109195	0.00881	16.43041	2	2R_12653773_SNP	2R_12653773_SNP	FBgn0034155	unc-104	0	INTRON	7	10	205
3L_5256654_SNP	FBgn0052423	shep	0	INTRON	8	11	205	3	3L_5256654_SNP	4	1018026	0.00000	7.74734	2	2R_17432695_SNP	2R_17432695_SNP	FBgn0003731	Egfr	0	INTRON	154	190	205
3L_5256671_SNP	FBgn0052423	shep	0	INTRON	8	12	205	3	3L_5256671_SNP	3	1018026	0.00000	7.64168	4	3R_3816183_SNP	3R_3816183_SNP	FBgn0037534	CG2781	0	INTRON	7	10	205
3L_5601272_SNP	FBgn0035624	Eaf6	0	NON_SYNONYMOUS_CODING	17	21	205	3	3L_5601272_SNP	10420	1214707	0.00858	16.38804	1	2L_6129077_SNP	2L_6129077_SNP	FBgn0261683	CG42730	0	UTR_3_PRIME	7	10	205
3L_8142629_SNP	FBgn0035844	CG13676	0	INTRON	63	76	205	3	3L_8142629_SNP	15895	1360050	0.01169	26.37157	5	X_10317171_SNP	X_10317171_SNP	FBgn0052683	CG32683	0	INTRON	109	135	205
3L_8142646_SNP	FBgn0035844	CG13676	0	INTRON	66	82	205	3	3L_8142646_SNP	12591	1361131	0.00925	24.58014	4	3R_18011042_SNP	3R_18011042_SNP	FBgn0051163	SKIP	0	INTRON	26	28	205
3L_9260043_SNP	FBgn0264000	GluRIB	0	INTRON	10	13	205	3	3L_9260043_SNP	23995	1073889	0.02234	17.58293	4	3R_14517767_SNP	3R_14517767_SNP	FBgn0038642	Muc91C	0	INTRON	18	21	205
3L_9276897_SNP	FBgn0264000	GluRIB	0	INTRON	14	17	205	3	3L_9276897_SNP	13724	1159916	0.01183	18.80129	5	X_12577932_SNP	X_12577932_SNP	FBgn0263865	Smr	304	DOWNSTREAM	25	31	205
3R_4452759_SNP	FBgn0261929	CG42796	0	NON_SYNONYMOUS_CODING	15	23	205	4	3R_4452759_SNP	5706	1200503	0.00475	15.12333	1	2L_4469637_SNP	2L_4469637_SNP	FBgn0011603	ine	0	INTRON	28	36	205
3R_5434177_SNP	FBgn0037720	CG8312	0	INTRON	47	56	205	4	3R_5434177_SNP	12135	1349468	0.00899	22.87108	2	2R_16464539_SNP	2R_16464539_SNP	FBgn0028622	qsm	0	INTRON	42	54	205
3R_6939644_SNP	FBgn0037860	CG6629	749	DOWNSTREAM	33	48	205	4	3R_6939644_SNP	32674	1332060	0.02453	41.03932	3	3L_887874_SNP	3L_887874_SNP	FBgn0052479	CG32479	0	INTRON	54	67	205
3R_7184420_SNP	FBgn0004595	pros	0	INTRON	11	14	205	4	3R_7184420_SNP	10280	1081908	0.00950	16.76745	2	2R_17395496_SNP	2R_17395496_SNP	FBgn0043070	MESK2	0	INTRON	9	10	205
X_13814753_SNP	FBgn0264981	mamo	0	INTRON	19	25	205	5	X_13814753_SNP	11280	1255022	0.00899	18.41805	3	3L_22885117_SNP	3L_22885117_SNP	FBgn0037203	slif	0	NON_SYNONYMOUS_CODING	37	50	205
X_6702714_SNP	FBgn0029903	pod1	0	INTRON	125	156	205	5	X_6702714_SNP	5891	1334890	0.00441	18.54939	5	X_17834374_SNP	X_17834374_SNP	FBgn0003380	Sh	0	INTRON	41	56	205

## Sheet: Heartperiod
1_ID	1_FlybaseID	1_GeneSymbol	1_Position	1_Type	1_NbOfLinesForMutationInEpistasis	1_NbOfLinesForMutationInDB	1_TotalNbOfLinesinDB	1_CHR	1_SNP	N_SIG	N_TOT	PROP	CHISQ	2_CHR	2_SNP	2_ID	2_FlybaseID	2_GeneSymbol	2_Position	2_Type	2_NbOfLinesForMutationInEpistasis	2_NbOfLinesForMutationInDB	2_TotalNbOfLinesinDB
2L_10647760_SNP	FBgn0265264	CG17097	0	NON_SYNONYMOUS_CODING	61	76	205	1	2L_10647760_SNP	21736	1355985	0.01603	30.10370	5	X_16817555_SNP	X_16817555_SNP	FBgn0027556	CG4928	0	INTRON	46	60	205
2L_13988457_SNP	FBgn0003255	rk	0	INTRON	10	12	205	1	2L_13988457_SNP	7862	1079807	0.00728	17.51665	4	3R_26121371_SNP	3R_26121371_SNP	FBgn0010113	hdc	0	INTRON	36	45	205
2L_13988632_SNP	FBgn0003255	rk	0	INTRON	10	12	205	1	2L_13988632_SNP	8824	1079807	0.00817	16.44524	4	3R_26121371_SNP	3R_26121371_SNP	FBgn0010113	hdc	0	INTRON	36	45	205
2L_22130022_SNP	FBgn0025674	CycK	0	INTRON	52	60	205	1	2L_22130022_SNP	15567	1354870	0.01149	32.51983	4	3R_19921471_SNP	3R_19921471_SNP	FBgn0053100	4EHP	0	INTRON	50	61	205
2L_22130118_SNP	FBgn0025674	CycK	0	UTR_5_PRIME	57	64	205	1	2L_22130118_SNP	14442	1357425	0.01064	31.46308	4	3R_19921471_SNP	3R_19921471_SNP	FBgn0053100	4EHP	0	INTRON	50	61	205
2L_22130265_SNP	FBgn0025674	CycK	123	UPSTREAM	59	66	205	1	2L_22130265_SNP	14286	1358071	0.01052	30.65050	4	3R_19921471_SNP	3R_19921471_SNP	FBgn0053100	4EHP	0	INTRON	50	61	205
2L_22130275_SNP	FBgn0025674	CycK	133	UPSTREAM	57	65	205	1	2L_22130275_SNP	14756	1357235	0.01087	29.36638	4	3R_19921471_SNP	3R_19921471_SNP	FBgn0053100	4EHP	0	INTRON	50	61	205
2L_22130283_SNP	FBgn0025674	CycK	141	UPSTREAM	55	63	205	1	2L_22130283_SNP	14728	1356637	0.01086	31.41808	4	3R_19921471_SNP	3R_19921471_SNP	FBgn0053100	4EHP	0	INTRON	50	61	205
2L_22130291_SNP	FBgn0025674	CycK	149	UPSTREAM	51	59	205	1	2L_22130291_SNP	16653	1354532	0.01229	27.31395	4	3R_19921471_SNP	3R_19921471_SNP	FBgn0053100	4EHP	0	INTRON	50	61	205
2L_22130620_SNP	FBgn0262885	CR43240	406	DOWNSTREAM	41	48	205	1	2L_22130620_SNP	10126	1343770	0.00754	22.12563	5	X_628214_SNP	X_628214_SNP	FBgn0021764	sdk	0	INTRON	50	61	205
2L_22130694_SNP	FBgn0262885	CR43240	332	DOWNSTREAM	54	62	205	1	2L_22130694_SNP	14913	1355789	0.01100	30.54680	4	3R_19921471_SNP	3R_19921471_SNP	FBgn0053100	4EHP	0	INTRON	50	61	205
2L_22130717_SNP	FBgn0262885	CR43240	309	DOWNSTREAM	55	63	205	1	2L_22130717_SNP	13759	1356537	0.01014	26.17693	4	3R_19921471_SNP	3R_19921471_SNP	FBgn0053100	4EHP	0	INTRON	50	61	205
2L_22130731_SNP	FBgn0262885	CR43240	295	DOWNSTREAM	57	64	205	1	2L_22130731_SNP	14809	1357244	0.01091	35.49166	4	3R_19921471_SNP	3R_19921471_SNP	FBgn0053100	4EHP	0	INTRON	50	61	205
2L_22130773_SNP	FBgn0262885	CR43240	253	DOWNSTREAM	51	58	205	1	2L_22130773_SNP	13042	1353261	0.00964	28.86864	2	2R_6871650_SNP	2R_6871650_SNP	FBgn0040765	luna	0	INTRON	17	22	205
2L_22130776_SNP	FBgn0262885	CR43240	250	DOWNSTREAM	47	54	205	1	2L_22130776_SNP	12328	1350462	0.00913	26.92054	2	2R_6871650_SNP	2R_6871650_SNP	FBgn0040765	luna	0	INTRON	17	22	205
2L_22130882_SNP	FBgn0262885	CR43240	144	DOWNSTREAM	59	67	205	1	2L_22130882_SNP	14602	1357954	0.01075	31.73533	4	3R_19921471_SNP	3R_19921471_SNP	FBgn0053100	4EHP	0	INTRON	50	61	205
2L_22131583_SNP	FBgn0261802	CG42748	0	UTR_5_PRIME	55	63	205	1	2L_22131583_SNP	16025	1356835	0.01181	33.77580	4	3R_19921471_SNP	3R_19921471_SNP	FBgn0053100	4EHP	0	INTRON	50	61	205
2L_22131629_SNP	FBgn0261802	CG42748	0	UTR_5_PRIME	59	67	205	1	2L_22131629_SNP	14456	1358269	0.01064	34.23982	4	3R_19921471_SNP	3R_19921471_SNP	FBgn0053100	4EHP	0	INTRON	50	61	205
2L_2328995_SNP	FBgn0031414	eys	0	INTRON	18	22	205	1	2L_2328995_SNP	2301	1219373	0.00189	14.39599	4	3R_21585384_SNP	3R_21585384_SNP	FBgn0066101	LpR1	0	INTRON	38	48	205
2L_3575104_SNP	FBgn0264370	CR43822	246	UPSTREAM	115	144	205	1	2L_3575104_SNP	31907	1334997	0.02390	28.08372	4	3R_25265611_SNP	3R_25265611_SNP	FBgn0004369	Ptp99A	0	INTRON	45	56	205
2L_8191448_SNP	FBgn0031995	CG8475	0	INTRON	39	46	205	1	2L_8191448_SNP	3272	1338809	0.00244	17.71438	1	2L_4314066_SNP	2L_4314066_SNP	FBgn0010473	tutl	0	INTRON	125	156	205
2L_8355912_SNP	FBgn0032026	CG7627	0	UTR_3_PRIME	15	18	205	1	2L_8355912_SNP	1602	1182812	0.00135	13.98527	3	3L_19283975_SNP	3L_19283975_SNP	FBgn0036862	Gbs-76A	0	INTRON	24	33	205
2R_2959324_SNP	FBgn0050299	tRNA:CR30299	986	UPSTREAM	37	50	205	2	2R_2959324_SNP	7748	1339297	0.00579	22.65518	4	3R_11830898_SNP	3R_11830898_SNP	FBgn0262028	CR42839	0	EXON	36	45	205
3L_10857155_SNP	FBgn0026160	tna	0	INTRON	55	72	205	3	3L_10857155_SNP	17645	1357722	0.01300	25.88062	5	X_2344371_SNP	X_2344371_SNP	FBgn0040388	boi	0	INTRON	38	50	205
3L_11147791_SNP	FBgn0052082	CG32082	0	INTRON	8	8	205	3	3L_11147791_SNP	457	984377	0.00046	10.24973	3	3L_7651275_SNP	3L_7651275_SNP	FBgn0052373	CG32373	0	INTRON	147	187	205
3L_3804810_SNP	FBgn0052264	CG32264	0	INTRON	40	51	205	3	3L_3804810_SNP	24538	1347185	0.01821	36.04532	5	X_5873710_SNP	X_5873710_SNP	FBgn0029830	Grip	0	INTRON	31	37	205
3L_5500030_SNP	FBgn0085371	CG34342	0	INTRON	39	46	205	3	3L_5500030_SNP	7716	1339681	0.00576	30.83424	3	3L_24381589_SNP	3L_24381589_SNP	FBgn0259697	nvd	0	INTRON	8	10	205
3L_7032548_SNP	FBgn0260660	mp	0	INTRON	74	94	205	3	3L_7032548_SNP	18089	1361130	0.01329	26.07710	1	2L_19874297_SNP	2L_19874297_SNP	FBgn0263873	sick	0	INTRON	42	50	205
3L_7032580_SNP	FBgn0260660	mp	0	INTRON	76	97	205	3	3L_7032580_SNP	18487	1361312	0.01358	26.31131	1	2L_19874297_SNP	2L_19874297_SNP	FBgn0263873	sick	0	INTRON	42	50	205
3L_9173690_SNP	FBgn0004244	Rdl	0	INTRON	47	62	205	3	3L_9173690_SNP	8452	1352254	0.00625	24.82858	3	3L_8639959_SNP	3L_8639959_SNP	FBgn0035921	CG13305	37	UPSTREAM	15	18	205
3R_13570452_SNP	FBgn0038541	TyrRII	0	INTRON	35	46	205	4	3R_13570452_SNP	25009	1325345	0.01887	25.33443	1	2L_10923679_SNP	2L_10923679_SNP	FBgn0261871	dpr2	0	INTRON	16	20	205
3R_13570469_SNP	FBgn0038541	TyrRII	0	INTRON	36	47	205	4	3R_13570469_SNP	23349	1328871	0.01757	24.86184	1	2L_10923679_SNP	2L_10923679_SNP	FBgn0261871	dpr2	0	INTRON	16	20	205
3R_13570542_SNP	FBgn0038541	TyrRII	0	INTRON	41	51	205	4	3R_13570542_SNP	22037	1341344	0.01643	26.13779	5	X_18412914_SNP	X_18412914_SNP	FBgn0030935	CG15048	0	INTRON	118	144	205
3R_16062316_SNP	FBgn0083975	CG34139	0	INTRON	15	20	205	4	3R_16062316_SNP	7439	1192528	0.00624	24.43976	3	3L_24381589_SNP	3L_24381589_SNP	FBgn0259697	nvd	0	INTRON	8	10	205
3R_16078078_SNP	FBgn0262582	cic	414	UPSTREAM	19	24	205	4	3R_16078078_SNP	28898	1233005	0.02344	33.29387	5	X_13775729_SNP	X_13775729_SNP	FBgn0264981	mamo	0	INTRON	78	100	205
3R_16133324_SNP	FBgn0038784	CG4362	66	UPSTREAM	12	16	205	4	3R_16133324_SNP	3332	1107410	0.00301	23.18188	3	3L_24381589_SNP	3L_24381589_SNP	FBgn0259697	nvd	0	INTRON	8	10	205
3R_16140229_SNP	FBgn0261550	CG42668	0	INTRON	13	18	205	4	3R_16140229_SNP	5293	1136261	0.00466	25.50836	3	3L_24381589_SNP	3L_24381589_SNP	FBgn0259697	nvd	0	INTRON	8	10	205
3R_16140420_SNP	FBgn0261550	CG42668	0	INTRON	11	14	205	4	3R_16140420_SNP	4461	1075889	0.00415	25.50836	3	3L_24381589_SNP	3L_24381589_SNP	FBgn0259697	nvd	0	INTRON	8	10	205
3R_16140504_SNP	FBgn0261550	CG42668	0	INTRON	13	16	205	4	3R_16140504_SNP	5293	1136261	0.00466	25.50836	3	3L_24381589_SNP	3L_24381589_SNP	FBgn0259697	nvd	0	INTRON	8	10	205
3R_16140543_SNP	FBgn0261550	CG42668	0	INTRON	13	17	205	4	3R_16140543_SNP	5293	1136261	0.00466	25.50836	3	3L_24381589_SNP	3L_24381589_SNP	FBgn0259697	nvd	0	INTRON	8	10	205
3R_16140544_SNP	FBgn0261550	CG42668	0	INTRON	13	16	205	4	3R_16140544_SNP	5293	1136261	0.00466	25.50836	3	3L_24381589_SNP	3L_24381589_SNP	FBgn0259697	nvd	0	INTRON	8	10	205
3R_16140564_SNP	FBgn0261550	CG42668	0	INTRON	13	17	205	4	3R_16140564_SNP	5092	1136260	0.00448	25.50836	3	3L_24381589_SNP	3L_24381589_SNP	FBgn0259697	nvd	0	INTRON	8	10	205
3R_16140835_SNP	FBgn0261550	CG42668	0	INTRON	13	17	205	4	3R_16140835_SNP	5293	1136261	0.00466	25.50836	3	3L_24381589_SNP	3L_24381589_SNP	FBgn0259697	nvd	0	INTRON	8	10	205
3R_19611309_SNP	FBgn0015513	mbc	0	INTRON	8	10	205	4	3R_19611309_SNP	1822	989427	0.00184	23.50025	3	3L_24381589_SNP	3L_24381589_SNP	FBgn0259697	nvd	0	INTRON	8	10	205
3R_19611362_SNP	FBgn0015513	mbc	0	INTRON	10	13	205	4	3R_19611362_SNP	5359	1073561	0.00499	23.50025	3	3L_24381589_SNP	3L_24381589_SNP	FBgn0259697	nvd	0	INTRON	8	10	205
3R_19611446_SNP	FBgn0015513	mbc	0	INTRON	21	24	205	4	3R_19611446_SNP	12121	1252835	0.00967	24.43287	1	2L_3788988_SNP	2L_3788988_SNP	FBgn0031571	CG3921	0	INTRON	45	58	205
3R_19611480_SNP	FBgn0015513	mbc	0	INTRON	19	22	205	4	3R_19611480_SNP	9510	1234335	0.00770	24.53723	3	3L_24381589_SNP	3L_24381589_SNP	FBgn0259697	nvd	0	INTRON	8	10	205
3R_19765011_SNP	FBgn0001098	Gdh	0	INTRON	102	133	205	4	3R_19765011_SNP	17720	1347245	0.01315	26.76719	3	3L_7522651_SNP	3L_7522651_SNP	FBgn0028582	lqf	0	INTRON	112	137	205
3R_23315858_SNP	FBgn0039520	Gr98a	168	DOWNSTREAM	10	11	205	4	3R_23315858_SNP	32	1049006	0.00003	7.74622	5	X_5718369_SNP	X_5718369_SNP	FBgn0029814	CG15765	0	INTRON	78	102	205
3R_23315867_SNP	FBgn0039520	Gr98a	177	DOWNSTREAM	10	12	205	4	3R_23315867_SNP	31	1049006	0.00003	7.68159	4	3R_20890860_SNP	3R_20890860_SNP	FBgn0039269	veli	0	INTRON	85	110	205
3R_25202605_SNP	FBgn0004369	Ptp99A	763	UPSTREAM	17	24	205	4	3R_25202605_SNP	21713	1221198	0.01778	23.87892	5	X_3613930_SNP	X_3613930_SNP	FBgn0086899	tlk	110	UPSTREAM	60	82	205
3R_25202883_SNP	FBgn0004369	Ptp99A	485	UPSTREAM	19	24	205	4	3R_25202883_SNP	4636	1224539	0.00379	17.54625	3	3L_3742153_SNP	3L_3742153_SNP	FBgn0052264	CG32264	0	INTRON	76	96	205
3R_6186975_SNP	FBgn0015396	jumu	0	UTR_3_PRIME	92	116	205	4	3R_6186975_SNP	12809	1354822	0.00945	22.90147	3	3L_9560066_SNP	3L_9560066_SNP	FBgn0261555	CG42673	0	INTRON	8	11	205
X_15714287_SNP	FBgn0003345	sd	0	INTRON	6	8	205	5	X_15714287_SNP	38618	881364	0.04382	14.86621	2	2R_3526486_SNP	2R_3526486_SNP	FBgn0263077	CG43340	0	INTRON	8	10	205
X_16596962_SNP	FBgn0030778	CG4678	0	INTRON	10	16	205	5	X_16596962_SNP	42501	1105269	0.03845	38.44236	3	3L_24381589_SNP	3L_24381589_SNP	FBgn0259697	nvd	0	INTRON	8	10	205
X_19109536_SNP	FBgn0031000	Muc18B	14	UPSTREAM	13	17	205	5	X_19109536_SNP	46	1159484	0.00004	11.14183	5	X_13350244_SNP	X_13350244_SNP	FBgn0265416	Neto	0	INTRON	10	13	205
X_19157091_SNP	FBgn0040068	vav	0	INTRON	18	22	205	5	X_19157091_SNP	20983	1218413	0.01722	19.86735	2	2R_11831141_SNP	2R_11831141_SNP	FBgn0034053	Cyp4aa1	0	INTRON	20	25	205
X_19520105_SNP	FBgn0031045	CG14212	0	NON_SYNONYMOUS_CODING	134	169	205	5	X_19520105_SNP	8644	1287165	0.00672	20.10049	3	3L_2423101_SNP	3L_2423101_SNP	FBgn0261551	CG42669	0	INTRON	42	53	205
X_20323130_SNP	FBgn0052506	CG32506	0	INTRON	90	117	205	5	X_20323130_SNP	19656	1361442	0.01444	29.71582	2	2R_8615921_SNP	2R_8615921_SNP	FBgn0261545	CG42663	0	INTRON	50	64	205

## Sheet: Arrythmia Index
1_ID	1_FlybaseID	1_GeneSymbol	1_Position	1_Type	1_NbOfLinesForMutationInEpistasis	1_NbOfLinesForMutationInDB	1_TotalNbOfLinesinDB	1_CHR	1_SNP	N_SIG	N_TOT	PROP	CHISQ	2_CHR	2_SNP	2_ID	2_FlybaseID	2_GeneSymbol	2_Position	2_Type	2_NbOfLinesForMutationInEpistasis	2_NbOfLinesForMutationInDB	2_TotalNbOfLinesinDB
3R_9827173_SNP	FBgn0264493	rdx	0	INTRON	5	8	205	4	3R_9827173_SNP	154	842666	0.00018	9.69092	5	X_14080811_SNP	X_14080811_SNP	FBgn0030542	CG12481	475	UPSTREAM	7	11	205
3R_21351842_SNP	FBgn0011666	msi	0	INTRON	7	8	205	4	3R_21351842_SNP	15166	943293	0.01608	15.26507	5	X_14777885_SNP	X_14777885_SNP	FBgn0264078	Flo-2	0	INTRON	14	21	205
X_19634922_SNP	FBgn0031066	CoVIb	0	UTR_3_PRIME	6	9	205	5	X_19634922_SNP	19	880321	0.00002	9.34596	1	2L_11855280_SNP	2L_11855280_SNP	FBgn0264815	Pde1c	0	INTRON	13	19	205
X_6539653_SNP	FBgn0029881	pigs	0	INTRON	8	10	205	5	X_6539653_SNP	25586	1023583	0.02500	16.10975	5	X_3459477_SNP	X_3459477_SNP	FBgn0052792	CG32792	0	INTRON	15	20	205
3R_10206355_SNP	FBgn0038225	soti	30	DOWNSTREAM	6	11	205	4	3R_10206355_SNP	43736	896340	0.04879	16.63474	1	2L_8340671_SNP	2L_8340671_SNP	FBgn0032023	CG14274	0	INTRON	8	10	205
2R_17358672_SNP	FBgn0010415	Sdc	0	INTRON	10	11	205	2	2R_17358672_SNP	35168	1082723	0.03248	21.03536	4	3R_15741367_SNP	3R_15741367_SNP	FBgn0038750	CG4465	223	DOWNSTREAM	24	34	205
X_2353514_SNP	FBgn0040388	boi	0	INTRON	11	12	205	5	X_2353514_SNP	1042	1073556	0.00097	13.49058	5	X_19740995_SNP	X_19740995_SNP	FBgn0261811	pico	0	INTRON	8	11	205
2R_6365544_SNP	FBgn0261862	whd	0	INTRON	8	12	205	2	2R_6365544_SNP	31305	984520	0.03180	19.21453	2	2R_6932569_SNP	2R_6932569_SNP	FBgn0040765	luna	0	INTRON	7	13	205
3L_2619954_SNP	FBgn0011828	Pxn	0	INTRON	10	12	205	3	3L_2619954_SNP	27405	1083569	0.02529	21.43796	3	3L_18000109_SNP	3L_18000109_SNP	FBgn0000568	Eip75B	0	INTRON	46	58	205
2R_17367566_SNP	FBgn0010415	Sdc	0	INTRON	14	16	205	2	2R_17367566_SNP	33745	1194282	0.02826	26.32851	3	3L_17026097_SNP	3L_17026097_SNP	FBgn0262895	CG43250	122	DOWNSTREAM	91	110	205
2R_16956186_SNP	FBgn0034582	Cht9	0	INTRON	16	19	205	2	2R_16956186_SNP	27867	1202103	0.02318	24.79723	1	2L_5661906_SNP	2L_5661906_SNP	FBgn0031728	Hsp60C	943	UPSTREAM	103	130	205
2R_16956194_SNP	FBgn0034582	Cht9	0	INTRON	16	19	205	2	2R_16956194_SNP	27616	1202103	0.02297	25.50486	1	2L_5661906_SNP	2L_5661906_SNP	FBgn0031728	Hsp60C	943	UPSTREAM	103	130	205
X_2354612_SNP	FBgn0040388	boi	0	INTRON	15	21	205	5	X_2354612_SNP	25963	1165787	0.02227	37.32617	2	2R_1095318_SNP	2R_1095318_SNP	FBgn0053554	Nipped-A	0	INTRON	9	12	205
X_2354613_SNP	FBgn0040388	boi	0	INTRON	15	21	205	5	X_2354613_SNP	26801	1165794	0.02299	37.32617	2	2R_1095318_SNP	2R_1095318_SNP	FBgn0053554	Nipped-A	0	INTRON	9	12	205
2R_6646602_SNP	FBgn0053144	CG33144	0	INTRON	15	23	205	2	2R_6646602_SNP	77	1194656	0.00006	13.85935	3	3L_18993580_SNP	3L_18993580_SNP	FBgn0036838	CG3808	0	NON_SYNONYMOUS_CODING	7	10	205
2R_6646607_SNP	FBgn0053144	CG33144	0	INTRON	16	24	205	2	2R_6646607_SNP	155	1210075	0.00013	17.24140	3	3L_18993580_SNP	3L_18993580_SNP	FBgn0036838	CG3808	0	NON_SYNONYMOUS_CODING	7	10	205
3L_19458208_SNP	FBgn0036870	CG14095	349	UPSTREAM	20	24	205	3	3L_19458208_SNP	55766	1244061	0.04483	33.01406	1	2L_6585825_SNP	2L_6585825_SNP	FBgn0031835	CG11319	0	INTRON	61	76	205
3L_19326698_SNP	FBgn0003089	pip	0	INTRON	21	28	205	3	3L_19326698_SNP	38602	1252993	0.03081	29.71334	2	2R_14022682_SNP	2R_14022682_SNP	FBgn0003044	Pcl	237	UPSTREAM	68	88	205
3R_24451849_SNP	FBgn0039590	CG10011	0	INTRON	20	30	205	4	3R_24451849_SNP	58387	1230891	0.04743	35.77340	3	3L_10651347_SNP	3L_10651347_SNP	FBgn0052066	CG32066	0	INTRON	23	28	205
3R_25056759_SNP	FBgn0028476	CG15817	0	INTRON	26	31	205	4	3R_25056759_SNP	61639	1269144	0.04857	37.11103	5	X_20685456_SNP	X_20685456_SNP	FBgn0085387	shakB	0	INTRON	42	49	205
2L_1026455_SNP	FBgn0031294	IA-2	0	INTRON	25	34	205	1	2L_1026455_SNP	34149	1288253	0.02651	31.35016	4	3R_24934064_SNP	3R_24934064_SNP	FBgn0039633	CG11873	0	UTR_3_PRIME	103	130	205
X_15356921_SNP	FBgn0030641	CG6299	0	UTR_5_PRIME	30	36	205	5	X_15356921_SNP	30347	1314983	0.02308	33.71292	5	X_7631134_SNP	X_7631134_SNP	FBgn0016041	Tom40	252	UPSTREAM	95	118	205
2L_8185446_SNP	FBgn0264953	Piezo	0	INTRON	36	41	205	1	2L_8185446_SNP	2309	1324214	0.00174	20.37671	2	2R_3702553_SNP	2R_3702553_SNP	FBgn0033226	CG1882	303	DOWNSTREAM	12	17	205
3R_11724287_SNP	FBgn0027657	glob1	0	INTRON	36	47	205	4	3R_11724287_SNP	26837	1329055	0.02019	29.30125	1	2L_15232206_SNP	2L_15232206_SNP	FBgn0028516	ZnT35C	0	INTRON	40	49	205
3R_11724264_SNP	FBgn0027657	glob1	0	INTRON	36	48	205	4	3R_11724264_SNP	26147	1329965	0.01966	30.92379	1	2L_4076077_SNP	2L_4076077_SNP	FBgn0000547	ed	0	INTRON	37	47	205
2R_6300666_SNP	FBgn0261698	CG42732	0	INTRON	66	86	205	2	2R_6300666_SNP	15684	1360225	0.01153	28.12736	2	2R_16312855_SNP	2R_16312855_SNP	FBgn0086604	CG12484	0	INTRON	91	116	205
2R_6300667_SNP	FBgn0261698	CG42732	0	INTRON	68	87	205	2	2R_6300667_SNP	14650	1360618	0.01077	26.18360	5	X_1839897_SNP	X_1839897_SNP	FBgn0264562	Hr4	0	INTRON	8	11	205
X_11126046_SNP	FBgn0261569	CG42683	0	INTRON	77	92	205	5	X_11126046_SNP	13271	1361035	0.00975	23.67375	3	3L_2861778_SNP	3L_2861778_SNP	FBgn0263392	CG43444	0	INTRON	140	174	205
X_998715_SNP	FBgn0040397	CG3655	0	INTRON	88	109	205	5	X_998715_SNP	9035	1356659	0.00666	22.82044	2	2R_16482805_SNP	2R_16482805_SNP	FBgn0015907	bl	0	INTRON	59	75	205
2R_9585171_SNP	FBgn0000633	fas	0	INTRON	99	126	205	2	2R_9585171_SNP	24250	1356449	0.01788	28.18373	2	2R_12832704_SNP	2R_12832704_SNP	FBgn0003091	Pkc53E	73	DOWNSTREAM	120	152	205
3L_16820115_SNP	FBgn0036665	CG13024	0	INTRON	133	164	205	3	3L_16820115_SNP	52551	1299931	0.04043	36.26777	1	2L_8695949_SNP	2L_8695949_SNP	FBgn0004914	Hnf4	0	INTRON	65	80	205
X_13020488_SNP	FBgn0052638	CG32638	0	INTRON	137	166	205	5	X_13020488_SNP	19102	1226071	0.01558	32.10343	3	3L_18687065_SNP	3L_18687065_SNP	FBgn0264719	CR43987	13	UPSTREAM	10	16	205
