# Supplementary material for: Genetic architecture of natural variation of cardiac performance from flies to humans
Source: eLife. 2022 Nov 16;11:e82459. doi: 10.7554/eLife.82459 (PMC9668334; doi:10.7554/eLife.82459)
Supplement: Figure 2—source data 1. [file elife-82459-fig2-data1.xlsx]

## Sheet: read me
Dataset S4
Interactions were from DroID database (http://www.droidb.org/) and from the Y2H FlyBi dataset (https://flybi.hms.harvard.edu/results.php).

## Sheet: Drosophila_Interactions
GENE1	GENE2	type of interaction
FBgn0003997	FBgn0015946	genetic_interaction
FBgn0003997	FBgn0243512	genetic_interaction
FBgn0003997	FBgn0003444	genetic_interaction
FBgn0003997	FBgn0262447	genetic_interaction
FBgn0003997	FBgn0015774	genetic_interaction
FBgn0003997	FBgn0261456	genetic_interaction
FBgn0004034	FBgn0003567	genetic_interaction
FBgn0004034	FBgn0004861	genetic_interaction
FBgn0004034	FBgn0000618	genetic_interaction
FBgn0004034	FBgn0002781	genetic_interaction
FBgn0004034	FBgn0267351	genetic_interaction
FBgn0004034	FBgn0003567	genetic_interaction
FBgn0004034	FBgn0000617	genetic_interaction
FBgn0004034	FBgn0002781	genetic_interaction
FBgn0004034	FBgn0015602	genetic_interaction
FBgn0004034	FBgn0087008	genetic_interaction
FBgn0004034	FBgn0037831	genetic_interaction
FBgn0004034	FBgn0000622	genetic_interaction
FBgn0004034	FBgn0003575	genetic_interaction
FBgn0004034	FBgn0000283	genetic_interaction
FBgn0004034	FBgn0284220	genetic_interaction
FBgn0004034	FBgn0000527	genetic_interaction
FBgn0004049	FBgn0002175	genetic_interaction
FBgn0004050	FBgn0260789	genetic_interaction
FBgn0004050	FBgn0005278	genetic_interaction
FBgn0004050	FBgn0000629	genetic_interaction
FBgn0004050	FBgn0265623	genetic_interaction
FBgn0003997	FBgn0086785	genetic_interaction
FBgn0004050	FBgn0000629	genetic_interaction
FBgn0004050	FBgn0003646	genetic_interaction
FBgn0004050	FBgn0003334	genetic_interaction
FBgn0004050	FBgn0087008	genetic_interaction
FBgn0004050	FBgn0003996	genetic_interaction
FBgn0004050	FBgn0000618	genetic_interaction
FBgn0004050	FBgn0003648	genetic_interaction
FBgn0004050	FBgn0005624	genetic_interaction
FBgn0004050	FBgn0003647	genetic_interaction
FBgn0004050	FBgn0003607	genetic_interaction
FBgn0004050	FBgn0000617	genetic_interaction
FBgn0004052	FBgn0010382	genetic_interaction
FBgn0004101	FBgn0052296	genetic_interaction
FBgn0004101	FBgn0086384	genetic_interaction
FBgn0004101	FBgn0000382	genetic_interaction
FBgn0004101	FBgn0004635	genetic_interaction
FBgn0004101	FBgn0263118	genetic_interaction
FBgn0004101	FBgn0266711	genetic_interaction
FBgn0004101	FBgn0042085	genetic_interaction
FBgn0004101	FBgn0000575	genetic_interaction
FBgn0004101	FBgn0000212	genetic_interaction
FBgn0004101	FBgn0004657	genetic_interaction
FBgn0004101	FBgn0261885	genetic_interaction
FBgn0004102	FBgn0266450	genetic_interaction
FBgn0004103	FBgn0000711	genetic_interaction
FBgn0004103	FBgn0003134	genetic_interaction
FBgn0004106	FBgn0000404	genetic_interaction
FBgn0004106	FBgn0004052	genetic_interaction
FBgn0004106	FBgn0000405	genetic_interaction
FBgn0004106	FBgn0010314	genetic_interaction
FBgn0004107	FBgn0003256	genetic_interaction
FBgn0004108	FBgn0264975	genetic_interaction
FBgn0004110	FBgn0025467	genetic_interaction
FBgn0004110	FBgn0004606	genetic_interaction
FBgn0004133	FBgn0011771	genetic_interaction
FBgn0004167	FBgn0086356	genetic_interaction
FBgn0004167	FBgn0259685	genetic_interaction
FBgn0004167	FBgn0024277	genetic_interaction
FBgn0004167	FBgn0024277	genetic_interaction
FBgn0004167	FBgn0086356	genetic_interaction
FBgn0004167	FBgn0267698	genetic_interaction
FBgn0004169	FBgn0264695	genetic_interaction
FBgn0004169	FBgn0004117	genetic_interaction
FBgn0004170	FBgn0003567	genetic_interaction
FBgn0004170	FBgn0000022	genetic_interaction
FBgn0004170	FBgn0002734	genetic_interaction
FBgn0004170	FBgn0001981	genetic_interaction
FBgn0004170	FBgn0020060	genetic_interaction
FBgn0004170	FBgn0002781	genetic_interaction
FBgn0004170	FBgn0264270	genetic_interaction
FBgn0004170	FBgn0004050	genetic_interaction
FBgn0004170	FBgn0003577	genetic_interaction
FBgn0004170	FBgn0000617	genetic_interaction
FBgn0004170	FBgn0010109	genetic_interaction
FBgn0004170	FBgn0000575	genetic_interaction
FBgn0004170	FBgn0002573	genetic_interaction
FBgn0004170	FBgn0003499	genetic_interaction
FBgn0004170	FBgn0002573	genetic_interaction
FBgn0004170	FBgn0003567	genetic_interaction
FBgn0004170	FBgn0002735	genetic_interaction
FBgn0004170	FBgn0003896	genetic_interaction
FBgn0004170	FBgn0002781	genetic_interaction
FBgn0004170	FBgn0001168	genetic_interaction
FBgn0004170	FBgn0000042	genetic_interaction
FBgn0004170	FBgn0267821	genetic_interaction
FBgn0004170	FBgn0002633	genetic_interaction
FBgn0004170	FBgn0000022	genetic_interaction
FBgn0004170	FBgn0087008	genetic_interaction
FBgn0004170	FBgn0262373	genetic_interaction
FBgn0004170	FBgn0000575	genetic_interaction
FBgn0004170	FBgn0014018	genetic_interaction
FBgn0004170	FBgn0000137	genetic_interaction
FBgn0004170	FBgn0015371	genetic_interaction
FBgn0004170	FBgn0013764	genetic_interaction
FBgn0004170	FBgn0005636	genetic_interaction
FBgn0004170	FBgn0264922	genetic_interaction
FBgn0004170	FBgn0000547	genetic_interaction
FBgn0004177	FBgn0002973	genetic_interaction
FBgn0004177	FBgn0042693	genetic_interaction
FBgn0004177	FBgn0003124	genetic_interaction
FBgn0004179	FBgn0013343	genetic_interaction
FBgn0004179	FBgn0266599	genetic_interaction
FBgn0003862	FBgn0027655	genetic_interaction
FBgn0003862	FBgn0000233	genetic_interaction
FBgn0003862	FBgn0266711	genetic_interaction
FBgn0003862	FBgn0011715	genetic_interaction
FBgn0003862	FBgn0037659	genetic_interaction
FBgn0003862	FBgn0039066	genetic_interaction
FBgn0003862	FBgn0266599	genetic_interaction
FBgn0003862	FBgn0020306	genetic_interaction
FBgn0003862	FBgn0261823	genetic_interaction
FBgn0003865	FBgn0003463	genetic_interaction
FBgn0003866	FBgn0026597	genetic_interaction
FBgn0003866	FBgn0016977	genetic_interaction
FBgn0003866	FBgn0028979	genetic_interaction
FBgn0003866	FBgn0001235	genetic_interaction
FBgn0003866	FBgn0284084	genetic_interaction
FBgn0003866	FBgn0024250	genetic_interaction
FBgn0003867	FBgn0005390	genetic_interaction
FBgn0003867	FBgn0000166	genetic_interaction
FBgn0003867	FBgn0003733	genetic_interaction
FBgn0003867	FBgn0003733	genetic_interaction
FBgn0003867	FBgn0023172	genetic_interaction
FBgn0003867	FBgn0016917	genetic_interaction
FBgn0003867	FBgn0004650	genetic_interaction
FBgn0003867	FBgn0003751	genetic_interaction
FBgn0003868	FBgn0003731	genetic_interaction
FBgn0003870	FBgn0041111	genetic_interaction
FBgn0003870	FBgn0002576	genetic_interaction
FBgn0003870	FBgn0005561	genetic_interaction
FBgn0003870	FBgn0003525	genetic_interaction
FBgn0003870	FBgn0262519	genetic_interaction
FBgn0003870	FBgn0020496	genetic_interaction
FBgn0003870	FBgn0016756	genetic_interaction
FBgn0003870	FBgn0016756	genetic_interaction
FBgn0003870	FBgn0005561	genetic_interaction
FBgn0003870	FBgn0013725	genetic_interaction
FBgn0003882	FBgn0015557	genetic_interaction
FBgn0003882	FBgn0004587	genetic_interaction
FBgn0003884	FBgn0040080	genetic_interaction
FBgn0003888	FBgn0040080	genetic_interaction
FBgn0003889	FBgn0261109	genetic_interaction
FBgn0003889	FBgn0004023	genetic_interaction
FBgn0003889	FBgn0086915	genetic_interaction
FBgn0003889	FBgn0003884	genetic_interaction
FBgn0003889	FBgn0001179	genetic_interaction
FBgn0003889	FBgn0260634	genetic_interaction
FBgn0003891	FBgn0267790	genetic_interaction
FBgn0003892	FBgn0035719	genetic_interaction
FBgn0003892	FBgn0284084	genetic_interaction
FBgn0003892	FBgn0003444	genetic_interaction
FBgn0003892	FBgn0003444	genetic_interaction
FBgn0003892	FBgn0262447	genetic_interaction
FBgn0003892	FBgn0001319	genetic_interaction
FBgn0003892	FBgn0000577	genetic_interaction
FBgn0003892	FBgn0000490	genetic_interaction
FBgn0003892	FBgn0011300	genetic_interaction
FBgn0003892	FBgn0005355	genetic_interaction
FBgn0003892	FBgn0003499	genetic_interaction
FBgn0003892	FBgn0040297	genetic_interaction
FBgn0003892	FBgn0004644	genetic_interaction
FBgn0003892	FBgn0004859	genetic_interaction
FBgn0003892	FBgn0003984	genetic_interaction
FBgn0003892	FBgn0038862	genetic_interaction
FBgn0003892	FBgn0024194	genetic_interaction
FBgn0003892	FBgn0001079	genetic_interaction
FBgn0003892	FBgn0001079	genetic_interaction
FBgn0003892	FBgn0005355	genetic_interaction
FBgn0003892	FBgn0037657	genetic_interaction
FBgn0003892	FBgn0004859	genetic_interaction
FBgn0003892	FBgn0034970	genetic_interaction
FBgn0003892	FBgn0003984	genetic_interaction
FBgn0003893	FBgn0005040	genetic_interaction
FBgn0003896	FBgn0004170	genetic_interaction
FBgn0003896	FBgn0086680	genetic_interaction
FBgn0003896	FBgn0002023	genetic_interaction
FBgn0003896	FBgn0003963	genetic_interaction
FBgn0003896	FBgn0267978	genetic_interaction
FBgn0003896	FBgn0000154	genetic_interaction
FBgn0003900	FBgn0284084	genetic_interaction
FBgn0003900	FBgn0003205	genetic_interaction
FBgn0003900	FBgn0267821	genetic_interaction
FBgn0003900	FBgn0000719	genetic_interaction
FBgn0003900	FBgn0284084	genetic_interaction
FBgn0003944	FBgn0000139	genetic_interaction
FBgn0003944	FBgn0004569	genetic_interaction
FBgn0003944	FBgn0000015	genetic_interaction
FBgn0003944	FBgn0000014	genetic_interaction
FBgn0003944	FBgn0003984	genetic_interaction
FBgn0003944	FBgn0004838	genetic_interaction
FBgn0003944	FBgn0004050	genetic_interaction
FBgn0003944	FBgn0003567	genetic_interaction
FBgn0003944	FBgn0036761	genetic_interaction
FBgn0003944	FBgn0003716	genetic_interaction
FBgn0003944	FBgn0000541	genetic_interaction
FBgn0003944	FBgn0004050	genetic_interaction
FBgn0003944	FBgn0037831	genetic_interaction
FBgn0003944	FBgn0261823	genetic_interaction
FBgn0003944	FBgn0034763	genetic_interaction
FBgn0003944	FBgn0261238	genetic_interaction
FBgn0003944	FBgn0000662	genetic_interaction
FBgn0003944	FBgn0015380	genetic_interaction
FBgn0003944	FBgn0261617	genetic_interaction
FBgn0003944	FBgn0003731	genetic_interaction
FBgn0003944	FBgn0013343	genetic_interaction
FBgn0003944	FBgn0000377	genetic_interaction
FBgn0003944	FBgn0000463	genetic_interaction
FBgn0003944	FBgn0013263	genetic_interaction
FBgn0003944	FBgn0037831	genetic_interaction
FBgn0003944	FBgn0005386	genetic_interaction
FBgn0003944	FBgn0003977	genetic_interaction
FBgn0003944	FBgn0001235	genetic_interaction
FBgn0003944	FBgn0004647	genetic_interaction
FBgn0003944	FBgn0010825	genetic_interaction
FBgn0003944	FBgn0051481	genetic_interaction
FBgn0003944	FBgn0001330	genetic_interaction
FBgn0003944	FBgn0022787	genetic_interaction
FBgn0003944	FBgn0003044	genetic_interaction
FBgn0003944	FBgn0000608	genetic_interaction
FBgn0003944	FBgn0003415	genetic_interaction
FBgn0003944	FBgn0013764	genetic_interaction
FBgn0003944	FBgn0015894	genetic_interaction
FBgn0003963	FBgn0003896	genetic_interaction
FBgn0003963	FBgn0003507	genetic_interaction
FBgn0003963	FBgn0010389	genetic_interaction
FBgn0003963	FBgn0003507	genetic_interaction
FBgn0003964	FBgn0045032	genetic_interaction
FBgn0003964	FBgn0262406	genetic_interaction
FBgn0003964	FBgn0038197	genetic_interaction
FBgn0003965	FBgn0003575	genetic_interaction
FBgn0003969	FBgn0003731	genetic_interaction
FBgn0003969	FBgn0003731	genetic_interaction
FBgn0003969	FBgn0014010	genetic_interaction
FBgn0003969	FBgn0004635	genetic_interaction
FBgn0003969	FBgn0085443	genetic_interaction
FBgn0003969	FBgn0000108	genetic_interaction
FBgn0003969	FBgn0014388	genetic_interaction
FBgn0003969	FBgn0004638	genetic_interaction
FBgn0003969	FBgn0003205	genetic_interaction
FBgn0003975	FBgn0084606	genetic_interaction
FBgn0003975	FBgn0284084	genetic_interaction
FBgn0003975	FBgn0084118	genetic_interaction
FBgn0003975	FBgn0000287	genetic_interaction
FBgn0003975	FBgn0003345	genetic_interaction
FBgn0003975	FBgn0013311	genetic_interaction
FBgn0003975	FBgn0053554	genetic_interaction
FBgn0003975	FBgn0011766	genetic_interaction
FBgn0003975	FBgn0000490	genetic_interaction
FBgn0003975	FBgn0243512	genetic_interaction
FBgn0003975	FBgn0267978	genetic_interaction
FBgn0003975	FBgn0084704	genetic_interaction
FBgn0003975	FBgn0011591	genetic_interaction
FBgn0003975	FBgn0034970	genetic_interaction
FBgn0003975	FBgn0084765	genetic_interaction
FBgn0003975	FBgn0261648	genetic_interaction
FBgn0003975	FBgn0040007	genetic_interaction
FBgn0003975	FBgn0004647	genetic_interaction
FBgn0003975	FBgn0003731	genetic_interaction
FBgn0003975	FBgn0036373	genetic_interaction
FBgn0003975	FBgn0084237	genetic_interaction
FBgn0003975	FBgn0004197	genetic_interaction
FBgn0003975	FBgn0260635	genetic_interaction
FBgn0003975	FBgn0005007	genetic_interaction
FBgn0003975	FBgn0000179	genetic_interaction
FBgn0003977	FBgn0264270	genetic_interaction
FBgn0003977	FBgn0005616	genetic_interaction
FBgn0003977	FBgn0039139	genetic_interaction
FBgn0003977	FBgn0005617	genetic_interaction
FBgn0003977	FBgn0002774	genetic_interaction
FBgn0003984	FBgn0000575	genetic_interaction
FBgn0003984	FBgn0027497	genetic_interaction
FBgn0003984	FBgn0003731	genetic_interaction
FBgn0003984	FBgn0004569	genetic_interaction
FBgn0003984	FBgn0003731	genetic_interaction
FBgn0003984	FBgn0039858	genetic_interaction
FBgn0003984	FBgn0023174	genetic_interaction
FBgn0003984	FBgn0004635	genetic_interaction
FBgn0003984	FBgn0042085	genetic_interaction
FBgn0003984	FBgn0005672	genetic_interaction
FBgn0003984	FBgn0004101	genetic_interaction
FBgn0003984	FBgn0002284	genetic_interaction
FBgn0003984	FBgn0000212	genetic_interaction
FBgn0003984	FBgn0267978	genetic_interaction
FBgn0003984	FBgn0052179	genetic_interaction
FBgn0003984	FBgn0024598	genetic_interaction
FBgn0003984	FBgn0032006	genetic_interaction
FBgn0003984	FBgn0052179	genetic_interaction
FBgn0003984	FBgn0259176	genetic_interaction
FBgn0003984	FBgn0005672	genetic_interaction
FBgn0003984	FBgn0003256	genetic_interaction
FBgn0003984	FBgn0003944	genetic_interaction
FBgn0003984	FBgn0000575	genetic_interaction
FBgn0003984	FBgn0040271	genetic_interaction
FBgn0003984	FBgn0001137	genetic_interaction
FBgn0003984	FBgn0003205	genetic_interaction
FBgn0003988	FBgn0003731	genetic_interaction
FBgn0003996	FBgn0265998	genetic_interaction
FBgn0003996	FBgn0003261	genetic_interaction
FBgn0003996	FBgn0014893	genetic_interaction
FBgn0003996	FBgn0039016	genetic_interaction
FBgn0003996	FBgn0017571	genetic_interaction
FBgn0003996	FBgn0002521	genetic_interaction
FBgn0003996	FBgn0005624	genetic_interaction
FBgn0003996	FBgn0264962	genetic_interaction
FBgn0003996	FBgn0003862	genetic_interaction
FBgn0003996	FBgn0017550	genetic_interaction
FBgn0003996	FBgn0003638	genetic_interaction
FBgn0003996	FBgn0039169	genetic_interaction
FBgn0003996	FBgn0004587	genetic_interaction
FBgn0003996	FBgn0002910	genetic_interaction
FBgn0003996	FBgn0003567	genetic_interaction
FBgn0003996	FBgn0011646	genetic_interaction
FBgn0003996	FBgn0003330	genetic_interaction
FBgn0003996	FBgn0000607	genetic_interaction
FBgn0003996	FBgn0266450	genetic_interaction
FBgn0003996	FBgn0261238	genetic_interaction
FBgn0003996	FBgn0004050	genetic_interaction
FBgn0003996	FBgn0003042	genetic_interaction
FBgn0003996	FBgn0013263	genetic_interaction
FBgn0003996	FBgn0015602	genetic_interaction
FBgn0003996	FBgn0000588	genetic_interaction
FBgn0003996	FBgn0261954	genetic_interaction
FBgn0003996	FBgn0000608	genetic_interaction
FBgn0003996	FBgn0004861	genetic_interaction
FBgn0003996	FBgn0004861	genetic_interaction
FBgn0003996	FBgn0261617	genetic_interaction
FBgn0003996	FBgn0000581	genetic_interaction
FBgn0003996	FBgn0003567	genetic_interaction
FBgn0003996	FBgn0000212	genetic_interaction
FBgn0003996	FBgn0003334	genetic_interaction
FBgn0003996	FBgn0032515	genetic_interaction
FBgn0003996	FBgn0026722	genetic_interaction
FBgn0003996	FBgn0000241	genetic_interaction
FBgn0003996	FBgn0020054	genetic_interaction
FBgn0003996	FBgn0011646	genetic_interaction
FBgn0003996	FBgn0010328	genetic_interaction
FBgn0003996	FBgn0087035	genetic_interaction
FBgn0003996	FBgn0003042	genetic_interaction
FBgn0003996	FBgn0265998	genetic_interaction
FBgn0003996	FBgn0031873	genetic_interaction
FBgn0003996	FBgn0010825	genetic_interaction
FBgn0003996	FBgn0017571	genetic_interaction
FBgn0003996	FBgn0003044	genetic_interaction
FBgn0003996	FBgn0020612	genetic_interaction
FBgn0003996	FBgn0003639	genetic_interaction
FBgn0003996	FBgn0266450	genetic_interaction
FBgn0003996	FBgn0014893	genetic_interaction
FBgn0003996	FBgn0005624	genetic_interaction
FBgn0003996	FBgn0005327	genetic_interaction
FBgn0003996	FBgn0000212	genetic_interaction
FBgn0003996	FBgn0082907	genetic_interaction
FBgn0003996	FBgn0003330	genetic_interaction
FBgn0003996	FBgn0003261	genetic_interaction
FBgn0003996	FBgn0034246	genetic_interaction
FBgn0003996	FBgn0004034	genetic_interaction
FBgn0003996	FBgn0002783	genetic_interaction
FBgn0003996	FBgn0039861	genetic_interaction
FBgn0003996	FBgn0003559	genetic_interaction
FBgn0003996	FBgn0261823	genetic_interaction
FBgn0003996	FBgn0265623	genetic_interaction
FBgn0003996	FBgn0020612	genetic_interaction
FBgn0003996	FBgn0000100	genetic_interaction
FBgn0003996	FBgn0004860	genetic_interaction
FBgn0003996	FBgn0266557	genetic_interaction
FBgn0003996	FBgn0263049	genetic_interaction
FBgn0003996	FBgn0024291	genetic_interaction
FBgn0003996	FBgn0027374	genetic_interaction
FBgn0003996	FBgn0037669	genetic_interaction
FBgn0003996	FBgn0031951	genetic_interaction
FBgn0003996	FBgn0020059	genetic_interaction
FBgn0003996	FBgn0001087	genetic_interaction
FBgn0003996	FBgn0087008	genetic_interaction
FBgn0003996	FBgn0011291	genetic_interaction
FBgn0003996	FBgn0010094	genetic_interaction
FBgn0003996	FBgn0003607	genetic_interaction
FBgn0003996	FBgn0002910	genetic_interaction
FBgn0003996	FBgn0020052	genetic_interaction
FBgn0003996	FBgn0020053	genetic_interaction
FBgn0003996	FBgn0013985	genetic_interaction
FBgn0003996	FBgn0004050	genetic_interaction
FBgn0003996	FBgn0011227	genetic_interaction
FBgn0003996	FBgn0020058	genetic_interaction
FBgn0003996	FBgn0261873	genetic_interaction
FBgn0003996	FBgn0005386	genetic_interaction
FBgn0003996	FBgn0004652	genetic_interaction
FBgn0003996	FBgn0000100	genetic_interaction
FBgn0003996	FBgn0013263	genetic_interaction
FBgn0003996	FBgn0000617	genetic_interaction
FBgn0003996	FBgn0003862	genetic_interaction
FBgn0003996	FBgn0000379	genetic_interaction
FBgn0003996	FBgn0027373	genetic_interaction
FBgn0003996	FBgn0020057	genetic_interaction
FBgn0003996	FBgn0019661	genetic_interaction
FBgn0003996	FBgn0014127	genetic_interaction
FBgn0003996	FBgn0003638	genetic_interaction
FBgn0003996	FBgn0261873	genetic_interaction
FBgn0003996	FBgn0000629	genetic_interaction
FBgn0003996	FBgn0003559	genetic_interaction
FBgn0003996	FBgn0000283	genetic_interaction
FBgn0003996	FBgn0020055	genetic_interaction
FBgn0003996	FBgn0000629	genetic_interaction
FBgn0003996	FBgn0027372	genetic_interaction
FBgn0003996	FBgn0020056	genetic_interaction
FBgn0003996	FBgn0037102	genetic_interaction
FBgn0003996	FBgn0005371	genetic_interaction
FBgn0003997	FBgn0002638	genetic_interaction
FBgn0003997	FBgn0036180	genetic_interaction
FBgn0003997	FBgn0263237	genetic_interaction
FBgn0003997	FBgn0053193	genetic_interaction
FBgn0003997	FBgn0003731	genetic_interaction
FBgn0003997	FBgn0260635	genetic_interaction
FBgn0003997	FBgn0262451	genetic_interaction
FBgn0003997	FBgn0263864	genetic_interaction
FBgn0003997	FBgn0260635	genetic_interaction
FBgn0003997	FBgn0019972	genetic_interaction
FBgn0003997	FBgn0011817	genetic_interaction
FBgn0003997	FBgn0010269	genetic_interaction
FBgn0003997	FBgn0038948	genetic_interaction
FBgn0003997	FBgn0026404	genetic_interaction
FBgn0003997	FBgn0020224	genetic_interaction
FBgn0003997	FBgn0036340	genetic_interaction
FBgn0003997	FBgn0011706	genetic_interaction
FBgn0003997	FBgn0028484	genetic_interaction
FBgn0003997	FBgn0031622	genetic_interaction
FBgn0003997	FBgn0003892	genetic_interaction
FBgn0003997	FBgn0032525	genetic_interaction
FBgn0003997	FBgn0035934	genetic_interaction
FBgn0003997	FBgn0040491	genetic_interaction
FBgn0003997	FBgn0027609	genetic_interaction
FBgn0003997	FBgn0033716	genetic_interaction
FBgn0003997	FBgn0011829	genetic_interaction
FBgn0003997	FBgn0003205	genetic_interaction
FBgn0003997	FBgn0262403	genetic_interaction
FBgn0003997	FBgn0285926	genetic_interaction
FBgn0003997	FBgn0027548	genetic_interaction
FBgn0003997	FBgn0085432	genetic_interaction
FBgn0003997	FBgn0028484	genetic_interaction
FBgn0003997	FBgn0015247	genetic_interaction
FBgn0003997	FBgn0032525	genetic_interaction
FBgn0003997	FBgn0003205	genetic_interaction
FBgn0003997	FBgn0023143	genetic_interaction
FBgn0003997	FBgn0039044	genetic_interaction
FBgn0003997	FBgn0033738	genetic_interaction
FBgn0003997	FBgn0033659	genetic_interaction
FBgn0003997	FBgn0034970	genetic_interaction
FBgn0003997	FBgn0015774	genetic_interaction
FBgn0003997	FBgn0022027	genetic_interaction
FBgn0003997	FBgn0261456	genetic_interaction
FBgn0003997	FBgn0000352	genetic_interaction
FBgn0003997	FBgn0003079	genetic_interaction
FBgn0003997	FBgn0001234	genetic_interaction
FBgn0003997	FBgn0259745	genetic_interaction
FBgn0003997	FBgn0011217	genetic_interaction
FBgn0003997	FBgn0038965	genetic_interaction
FBgn0003997	FBgn0002576	genetic_interaction
FBgn0003997	FBgn0263107	genetic_interaction
FBgn0003997	FBgn0003256	genetic_interaction
FBgn0003997	FBgn0015922	genetic_interaction
FBgn0003997	FBgn0025680	genetic_interaction
FBgn0003997	FBgn0004618	genetic_interaction
FBgn0003997	FBgn0004569	genetic_interaction
FBgn0003997	FBgn0037980	genetic_interaction
FBgn0003997	FBgn0266717	genetic_interaction
FBgn0003997	FBgn0263852	genetic_interaction
FBgn0003997	FBgn0027572	genetic_interaction
FBgn0003997	FBgn0030028	genetic_interaction
FBgn0003997	FBgn0015773	genetic_interaction
FBgn0003997	FBgn0004390	genetic_interaction
FBgn0003997	FBgn0033051	genetic_interaction
FBgn0003997	FBgn0044081	genetic_interaction
FBgn0003997	FBgn0010909	genetic_interaction
FBgn0003997	FBgn0013469	genetic_interaction
FBgn0003997	FBgn0003256	genetic_interaction
FBgn0003997	FBgn0027053	genetic_interaction
FBgn0003997	FBgn0026313	genetic_interaction
FBgn0003997	FBgn0038948	genetic_interaction
FBgn0003997	FBgn0014388	genetic_interaction
FBgn0003997	FBgn0015790	genetic_interaction
FBgn0003997	FBgn0010269	genetic_interaction
FBgn0003997	FBgn0004956	genetic_interaction
FBgn0003997	FBgn0028381	genetic_interaction
FBgn0003997	FBgn0000229	genetic_interaction
FBgn0003997	FBgn0000273	genetic_interaction
FBgn0003997	FBgn0000411	genetic_interaction
FBgn0003997	FBgn0011706	genetic_interaction
FBgn0003997	FBgn0264562	genetic_interaction
FBgn0003997	FBgn0003118	genetic_interaction
FBgn0003997	FBgn0013726	genetic_interaction
FBgn0003997	FBgn0013724	genetic_interaction
FBgn0003997	FBgn0003731	genetic_interaction
FBgn0003997	FBgn0031157	genetic_interaction
FBgn0003997	FBgn0020497	genetic_interaction
FBgn0000117	FBgn0000017	genetic_interaction
FBgn0000117	FBgn0041781	genetic_interaction
FBgn0000117	FBgn0284435	genetic_interaction
FBgn0000117	FBgn0082167	genetic_interaction
FBgn0000117	FBgn0027548	genetic_interaction
FBgn0000117	FBgn0284247	genetic_interaction
FBgn0000117	FBgn0027647	genetic_interaction
FBgn0000117	FBgn0026319	genetic_interaction
FBgn0000117	FBgn0002783	genetic_interaction
FBgn0000117	FBgn0040075	genetic_interaction
FBgn0000117	FBgn0004859	genetic_interaction
FBgn0000117	FBgn0003391	genetic_interaction
FBgn0000117	FBgn0000212	genetic_interaction
FBgn0000117	FBgn0005672	genetic_interaction
FBgn0000117	FBgn0035153	genetic_interaction
FBgn0000117	FBgn0004106	genetic_interaction
FBgn0000117	FBgn0267821	genetic_interaction
FBgn0000117	FBgn0002945	genetic_interaction
FBgn0000117	FBgn0011817	genetic_interaction
FBgn0000117	FBgn0259685	genetic_interaction
FBgn0000117	FBgn0261873	genetic_interaction
FBgn0000117	FBgn0015771	genetic_interaction
FBgn0000117	FBgn0040078	genetic_interaction
FBgn0000117	FBgn0000229	genetic_interaction
FBgn0000117	FBgn0026323	genetic_interaction
FBgn0000117	FBgn0243512	genetic_interaction
FBgn0000117	FBgn0004859	genetic_interaction
FBgn0000119	FBgn0067784	genetic_interaction
FBgn0000119	FBgn0000499	genetic_interaction
FBgn0000119	FBgn0243512	genetic_interaction
FBgn0000119	FBgn0243512	genetic_interaction
FBgn0000120	FBgn0000121	genetic_interaction
FBgn0000121	FBgn0002524	genetic_interaction
FBgn0000121	FBgn0004435	genetic_interaction
FBgn0000121	FBgn0000120	genetic_interaction
FBgn0000121	FBgn0261448	genetic_interaction
FBgn0000121	FBgn0259234	genetic_interaction
FBgn0000121	FBgn0039774	genetic_interaction
FBgn0000121	FBgn0262738	genetic_interaction
FBgn0000137	FBgn0001981	genetic_interaction
FBgn0000137	FBgn0005636	genetic_interaction
FBgn0000139	FBgn0004101	genetic_interaction
FBgn0000139	FBgn0003731	genetic_interaction
FBgn0000139	FBgn0016984	genetic_interaction
FBgn0000140	FBgn0003256	genetic_interaction
FBgn0000140	FBgn0004643	genetic_interaction
FBgn0000140	FBgn0003514	genetic_interaction
FBgn0000140	FBgn0263855	genetic_interaction
FBgn0000140	FBgn0003256	genetic_interaction
FBgn0000140	FBgn0035640	genetic_interaction
FBgn0000140	FBgn0003514	genetic_interaction
FBgn0000140	FBgn0003268	genetic_interaction
FBgn0000140	FBgn0010269	genetic_interaction
FBgn0000140	FBgn0261004	genetic_interaction
FBgn0000146	FBgn0019686	genetic_interaction
FBgn0000146	FBgn0028734	genetic_interaction
FBgn0000146	FBgn0004367	genetic_interaction
FBgn0000147	FBgn0259791	genetic_interaction
FBgn0000147	FBgn0031374	genetic_interaction
FBgn0000147	FBgn0031374	genetic_interaction
FBgn0000147	FBgn0026181	genetic_interaction
FBgn0000147	FBgn0002973	genetic_interaction
FBgn0000147	FBgn0035640	genetic_interaction
FBgn0000147	FBgn0035640	genetic_interaction
FBgn0000147	FBgn0003514	genetic_interaction
FBgn0000147	FBgn0261854	genetic_interaction
FBgn0000147	FBgn0265434	genetic_interaction
FBgn0000147	FBgn0010316	genetic_interaction
FBgn0000147	FBgn0004647	genetic_interaction
FBgn0000147	FBgn0000163	genetic_interaction
FBgn0000150	FBgn0285896	genetic_interaction
FBgn0000150	FBgn0014010	genetic_interaction
FBgn0000150	FBgn0285896	genetic_interaction
FBgn0000150	FBgn0003162	genetic_interaction
FBgn0000150	FBgn0002022	genetic_interaction
FBgn0000152	FBgn0010602	genetic_interaction
FBgn0000153	FBgn0003186	genetic_interaction
FBgn0000153	FBgn0003546	genetic_interaction
FBgn0000153	FBgn0003189	genetic_interaction
FBgn0000154	FBgn0020263	genetic_interaction
FBgn0000154	FBgn0263755	genetic_interaction
FBgn0000154	FBgn0283451	genetic_interaction
FBgn0000154	FBgn0267978	genetic_interaction
FBgn0000154	FBgn0267978	genetic_interaction
FBgn0000241	FBgn0031820	genetic_interaction
FBgn0000241	FBgn0027339	genetic_interaction
FBgn0000241	FBgn0262829	genetic_interaction
FBgn0000241	FBgn0067869	genetic_interaction
FBgn0000244	FBgn0000229	genetic_interaction
FBgn0000244	FBgn0010303	genetic_interaction
FBgn0000247	FBgn0003996	genetic_interaction
FBgn0000250	FBgn0045861	genetic_interaction
FBgn0000250	FBgn0003495	genetic_interaction
FBgn0000250	FBgn0000533	genetic_interaction
FBgn0000250	FBgn0260632	genetic_interaction
FBgn0000250	FBgn0031114	genetic_interaction
FBgn0000250	FBgn0036752	genetic_interaction
FBgn0000250	FBgn0023441	genetic_interaction
FBgn0000250	FBgn0011274	genetic_interaction
FBgn0000250	FBgn0262473	genetic_interaction
FBgn0000250	FBgn0001137	genetic_interaction
FBgn0000250	FBgn0003882	genetic_interaction
FBgn0000250	FBgn0285937	genetic_interaction
FBgn0000250	FBgn0010441	genetic_interaction
FBgn0000253	FBgn0011286	genetic_interaction
FBgn0000253	FBgn0001991	genetic_interaction
FBgn0000257	FBgn0004629	genetic_interaction
FBgn0000257	FBgn0003996	genetic_interaction
FBgn0000259	FBgn0260753	genetic_interaction
FBgn0000261	FBgn0035438	genetic_interaction
FBgn0000261	FBgn0024846	genetic_interaction
FBgn0000273	FBgn0284084	genetic_interaction
FBgn0000273	FBgn0005355	genetic_interaction
FBgn0000273	FBgn0000490	genetic_interaction
FBgn0000273	FBgn0085432	genetic_interaction
FBgn0000273	FBgn0027580	genetic_interaction
FBgn0000273	FBgn0004859	genetic_interaction
FBgn0000273	FBgn0259243	genetic_interaction
FBgn0000283	FBgn0010342	genetic_interaction
FBgn0000283	FBgn0003514	genetic_interaction
FBgn0000289	FBgn0000658	genetic_interaction
FBgn0000289	FBgn0004859	genetic_interaction
FBgn0000289	FBgn0262029	genetic_interaction
FBgn0000289	FBgn0003513	genetic_interaction
FBgn0000289	FBgn0284247	genetic_interaction
FBgn0000299	FBgn0016075	genetic_interaction
FBgn0000299	FBgn0021767	genetic_interaction
FBgn0000303	FBgn0260003	genetic_interaction
FBgn0000308	FBgn0000256	genetic_interaction
FBgn0000308	FBgn0260635	genetic_interaction
FBgn0000308	FBgn0028734	genetic_interaction
FBgn0000308	FBgn0016674	genetic_interaction
FBgn0000308	FBgn0016674	genetic_interaction
FBgn0000308	FBgn0026598	genetic_interaction
FBgn0000308	FBgn0263987	genetic_interaction
FBgn0000308	FBgn0000017	genetic_interaction
FBgn0000316	FBgn0263241	genetic_interaction
FBgn0000317	FBgn0003514	genetic_interaction
FBgn0000319	FBgn0004647	genetic_interaction
FBgn0000319	FBgn0004647	genetic_interaction
FBgn0000320	FBgn0003460	genetic_interaction
FBgn0000320	FBgn0003460	genetic_interaction
FBgn0000320	FBgn0000017	genetic_interaction
FBgn0000320	FBgn0005677	genetic_interaction
FBgn0000320	FBgn0003256	genetic_interaction
FBgn0000320	FBgn0003731	genetic_interaction
FBgn0000320	FBgn0000017	genetic_interaction
FBgn0000320	FBgn0005677	genetic_interaction
FBgn0000320	FBgn0003256	genetic_interaction
FBgn0000330	FBgn0050077	genetic_interaction
FBgn0000330	FBgn0003996	genetic_interaction
FBgn0000339	FBgn0243513	genetic_interaction
FBgn0000339	FBgn0086244	genetic_interaction
FBgn0000346	FBgn0266464	genetic_interaction
FBgn0000346	FBgn0265516	genetic_interaction
FBgn0000346	FBgn0265514	genetic_interaction
FBgn0000346	FBgn0041730	genetic_interaction
FBgn0000346	FBgn0265513	genetic_interaction
FBgn0000346	FBgn0263111	genetic_interaction
FBgn0000346	FBgn0265515	genetic_interaction
FBgn0000346	FBgn0003392	genetic_interaction
FBgn0000346	FBgn0250791	genetic_interaction
FBgn0000351	FBgn0010314	genetic_interaction
FBgn0000352	FBgn0003444	genetic_interaction
FBgn0000352	FBgn0026597	genetic_interaction
FBgn0000352	FBgn0004859	genetic_interaction
FBgn0000354	FBgn0000179	genetic_interaction
FBgn0000356	FBgn0003870	genetic_interaction
FBgn0000370	FBgn0003553	genetic_interaction
FBgn0000370	FBgn0017486	genetic_interaction
FBgn0000376	FBgn0263755	genetic_interaction
FBgn0000376	FBgn0003044	genetic_interaction
FBgn0000376	FBgn0263755	genetic_interaction
FBgn0000382	FBgn0001965	genetic_interaction
FBgn0000382	FBgn0004101	genetic_interaction
FBgn0000382	FBgn0005672	genetic_interaction
FBgn0000382	FBgn0016756	genetic_interaction
FBgn0000382	FBgn0029006	genetic_interaction
FBgn0000382	FBgn0003118	genetic_interaction
FBgn0000382	FBgn0000490	genetic_interaction
FBgn0000382	FBgn0014388	genetic_interaction
FBgn0000382	FBgn0004864	genetic_interaction
FBgn0000382	FBgn0014388	genetic_interaction
FBgn0000382	FBgn0004635	genetic_interaction
FBgn0000382	FBgn0003310	genetic_interaction
FBgn0000382	FBgn0003984	genetic_interaction
FBgn0000382	FBgn0043884	genetic_interaction
FBgn0000382	FBgn0003256	genetic_interaction
FBgn0000382	FBgn0010269	genetic_interaction
FBgn0000382	FBgn0011648	genetic_interaction
FBgn0000382	FBgn0002736	genetic_interaction
FBgn0000382	FBgn0000463	genetic_interaction
FBgn0000382	FBgn0026252	genetic_interaction
FBgn0000382	FBgn0003205	genetic_interaction
FBgn0000382	FBgn0004569	genetic_interaction
FBgn0000382	FBgn0003731	genetic_interaction
FBgn0000382	FBgn0004390	genetic_interaction
FBgn0000382	FBgn0004638	genetic_interaction
FBgn0000382	FBgn0000591	genetic_interaction
FBgn0000382	FBgn0001233	genetic_interaction
FBgn0000382	FBgn0000591	genetic_interaction
FBgn0000382	FBgn0016791	genetic_interaction
FBgn0000382	FBgn0002524	genetic_interaction
FBgn0000382	FBgn0016794	genetic_interaction
FBgn0000382	FBgn0003716	genetic_interaction
FBgn0000382	FBgn0016917	genetic_interaction
FBgn0000382	FBgn0003118	genetic_interaction
FBgn0000382	FBgn0004101	genetic_interaction
FBgn0000382	FBgn0004864	genetic_interaction
FBgn0000154	FBgn0283451	genetic_interaction
FBgn0000154	FBgn0003547	genetic_interaction
FBgn0000154	FBgn0023518	genetic_interaction
FBgn0000154	FBgn0263667	genetic_interaction
FBgn0000154	FBgn0003567	genetic_interaction
FBgn0000154	FBgn0003892	genetic_interaction
FBgn0000154	FBgn0000176	genetic_interaction
FBgn0000154	FBgn0029096	genetic_interaction
FBgn0000154	FBgn0011646	genetic_interaction
FBgn0000154	FBgn0000539	genetic_interaction
FBgn0000154	FBgn0002685	genetic_interaction
FBgn0000154	FBgn0013764	genetic_interaction
FBgn0000154	FBgn0026267	genetic_interaction
FBgn0000157	FBgn0000459	genetic_interaction
FBgn0000157	FBgn0001235	genetic_interaction
FBgn0000157	FBgn0000459	genetic_interaction
FBgn0000158	FBgn0264491	genetic_interaction
FBgn0000158	FBgn0283442	genetic_interaction
FBgn0000158	FBgn0001942	genetic_interaction
FBgn0000158	FBgn0011766	genetic_interaction
FBgn0000158	FBgn0052364	genetic_interaction
FBgn0000158	FBgn0001942	genetic_interaction
FBgn0000158	FBgn0004581	genetic_interaction
FBgn0000158	FBgn0264491	genetic_interaction
FBgn0000158	FBgn0015218	genetic_interaction
FBgn0000158	FBgn0024177	genetic_interaction
FBgn0000158	FBgn0027054	genetic_interaction
FBgn0000158	FBgn0011207	genetic_interaction
FBgn0000158	FBgn0032725	genetic_interaction
FBgn0000158	FBgn0041184	genetic_interaction
FBgn0000158	FBgn0027889	genetic_interaction
FBgn0000158	FBgn0027053	genetic_interaction
FBgn0000158	FBgn0052364	genetic_interaction
FBgn0000158	FBgn0033261	genetic_interaction
FBgn0000158	FBgn0002962	genetic_interaction
FBgn0000160	FBgn0285944	genetic_interaction
FBgn0000163	FBgn0044020	genetic_interaction
FBgn0000163	FBgn0261797	genetic_interaction
FBgn0000163	FBgn0026361	genetic_interaction
FBgn0000163	FBgn0052150	genetic_interaction
FBgn0000163	FBgn0033757	genetic_interaction
FBgn0000163	FBgn0038535	genetic_interaction
FBgn0000163	FBgn0028992	genetic_interaction
FBgn0000163	FBgn0033259	genetic_interaction
FBgn0000163	FBgn0039632	genetic_interaction
FBgn0000163	FBgn0014020	genetic_interaction
FBgn0000163	FBgn0032752	genetic_interaction
FBgn0000163	FBgn0039623	genetic_interaction
FBgn0000163	FBgn0001202	genetic_interaction
FBgn0000163	FBgn0010348	genetic_interaction
FBgn0000163	FBgn0038515	genetic_interaction
FBgn0000163	FBgn0002121	genetic_interaction
FBgn0000163	FBgn0000140	genetic_interaction
FBgn0000163	FBgn0259685	genetic_interaction
FBgn0000163	FBgn0050372	genetic_interaction
FBgn0000163	FBgn0000658	genetic_interaction
FBgn0000163	FBgn0265434	genetic_interaction
FBgn0000163	FBgn0000547	genetic_interaction
FBgn0000163	FBgn0260934	genetic_interaction
FBgn0000163	FBgn0263289	genetic_interaction
FBgn0000163	FBgn0261854	genetic_interaction
FBgn0000163	FBgn0013765	genetic_interaction
FBgn0000163	FBgn0034246	genetic_interaction
FBgn0000163	FBgn0026192	genetic_interaction
FBgn0000163	FBgn0003391	genetic_interaction
FBgn0000166	FBgn0032493	genetic_interaction
FBgn0000166	FBgn0013764	genetic_interaction
FBgn0000166	FBgn0001180	genetic_interaction
FBgn0000166	FBgn0003997	genetic_interaction
FBgn0000166	FBgn0003733	genetic_interaction
FBgn0000166	FBgn0001180	genetic_interaction
FBgn0000173	FBgn0010303	genetic_interaction
FBgn0000173	FBgn0026323	genetic_interaction
FBgn0000173	FBgn0265464	genetic_interaction
FBgn0000176	FBgn0000154	genetic_interaction
FBgn0000179	FBgn0010303	genetic_interaction
FBgn0000179	FBgn0000490	genetic_interaction
FBgn0000179	FBgn0267978	genetic_interaction
FBgn0000179	FBgn0024846	genetic_interaction
FBgn0000179	FBgn0243512	genetic_interaction
FBgn0000179	FBgn0004859	genetic_interaction
FBgn0000179	FBgn0243512	genetic_interaction
FBgn0000179	FBgn0284084	genetic_interaction
FBgn0000180	FBgn0000463	genetic_interaction
FBgn0000180	FBgn0004647	genetic_interaction
FBgn0000180	FBgn0004647	genetic_interaction
FBgn0000182	FBgn0041775	genetic_interaction
FBgn0000182	FBgn0262656	genetic_interaction
FBgn0000182	FBgn0000615	genetic_interaction
FBgn0000182	FBgn0004419	genetic_interaction
FBgn0000183	FBgn0001308	genetic_interaction
FBgn0000183	FBgn0283442	genetic_interaction
FBgn0000183	FBgn0038659	genetic_interaction
FBgn0000183	FBgn0000562	genetic_interaction
FBgn0000183	FBgn0016070	genetic_interaction
FBgn0000183	FBgn0265297	genetic_interaction
FBgn0000183	FBgn0004167	genetic_interaction
FBgn0000183	FBgn0015754	genetic_interaction
FBgn0000183	FBgn0045862	genetic_interaction
FBgn0000183	FBgn0003124	genetic_interaction
FBgn0000193	FBgn0000555	genetic_interaction
FBgn0000206	FBgn0004390	genetic_interaction
FBgn0000206	FBgn0004876	genetic_interaction
FBgn0000212	FBgn0031655	genetic_interaction
FBgn0000212	FBgn0040075	genetic_interaction
FBgn0000212	FBgn0040078	genetic_interaction
FBgn0000212	FBgn0262955	genetic_interaction
FBgn0000212	FBgn0003277	genetic_interaction
FBgn0000212	FBgn0004053	genetic_interaction
FBgn0000212	FBgn0011715	genetic_interaction
FBgn0000212	FBgn0261885	genetic_interaction
FBgn0000212	FBgn0000463	genetic_interaction
FBgn0000212	FBgn0030093	genetic_interaction
FBgn0000212	FBgn0011715	genetic_interaction
FBgn0000212	FBgn0027655	genetic_interaction
FBgn0000212	FBgn0002783	genetic_interaction
FBgn0000212	FBgn0034970	genetic_interaction
FBgn0000212	FBgn0025463	genetic_interaction
FBgn0000212	FBgn0004647	genetic_interaction
FBgn0000212	FBgn0003984	genetic_interaction
FBgn0000212	FBgn0040071	genetic_interaction
FBgn0000212	FBgn0026160	genetic_interaction
FBgn0000212	FBgn0020306	genetic_interaction
FBgn0000212	FBgn0029094	genetic_interaction
FBgn0000216	FBgn0001169	genetic_interaction
FBgn0000216	FBgn0002932	genetic_interaction
FBgn0000216	FBgn0000463	genetic_interaction
FBgn0000216	FBgn0017649	genetic_interaction
FBgn0000216	FBgn0018737	genetic_interaction
FBgn0000216	FBgn0004647	genetic_interaction
FBgn0000221	FBgn0267821	genetic_interaction
FBgn0000229	FBgn0000635	genetic_interaction
FBgn0000229	FBgn0041100	genetic_interaction
FBgn0000229	FBgn0259834	genetic_interaction
FBgn0000229	FBgn0001297	genetic_interaction
FBgn0000229	FBgn0001225	genetic_interaction
FBgn0000229	FBgn0001291	genetic_interaction
FBgn0000229	FBgn0028325	genetic_interaction
FBgn0000229	FBgn0033657	genetic_interaction
FBgn0000229	FBgn0001258	genetic_interaction
FBgn0000229	FBgn0041100	genetic_interaction
FBgn0000229	FBgn0000097	genetic_interaction
FBgn0000229	FBgn0283500	genetic_interaction
FBgn0000229	FBgn0000499	genetic_interaction
FBgn0000229	FBgn0044323	genetic_interaction
FBgn0000229	FBgn0010909	genetic_interaction
FBgn0000229	FBgn0001291	genetic_interaction
FBgn0000229	FBgn0028546	genetic_interaction
FBgn0000229	FBgn0036046	genetic_interaction
FBgn0000229	FBgn0267825	genetic_interaction
FBgn0000229	FBgn0026319	genetic_interaction
FBgn0000229	FBgn0243512	genetic_interaction
FBgn0000233	FBgn0013434	genetic_interaction
FBgn0000233	FBgn0020378	genetic_interaction
FBgn0000233	FBgn0000157	genetic_interaction
FBgn0000233	FBgn0041763	genetic_interaction
FBgn0000237	FBgn0002285	genetic_interaction
FBgn0000237	FBgn0004569	genetic_interaction
FBgn0000237	FBgn0015922	genetic_interaction
FBgn0000237	FBgn0004569	genetic_interaction
FBgn0000241	FBgn0067871	genetic_interaction
FBgn0000241	FBgn0067876	genetic_interaction
FBgn0000241	FBgn0052438	genetic_interaction
FBgn0000241	FBgn0067881	genetic_interaction
FBgn0000241	FBgn0039139	genetic_interaction
FBgn0000241	FBgn0067865	genetic_interaction
FBgn0000241	FBgn0022361	genetic_interaction
FBgn0000241	FBgn0034878	genetic_interaction
FBgn0000241	FBgn0027620	genetic_interaction
FBgn0000241	FBgn0004362	genetic_interaction
FBgn0000241	FBgn0037607	genetic_interaction
FBgn0000241	FBgn0029094	genetic_interaction
FBgn0000241	FBgn0036915	genetic_interaction
FBgn0000241	FBgn0250786	genetic_interaction
FBgn0000241	FBgn0032157	genetic_interaction
FBgn0000241	FBgn0263102	genetic_interaction
FBgn0000241	FBgn0067886	genetic_interaction
FBgn0000241	FBgn0037382	genetic_interaction
FBgn0000241	FBgn0010228	genetic_interaction
FBgn0000241	FBgn0053182	genetic_interaction
FBgn0000241	FBgn0261239	genetic_interaction
FBgn0000241	FBgn0067873	genetic_interaction
FBgn0000241	FBgn0003261	genetic_interaction
FBgn0000241	FBgn0067883	genetic_interaction
FBgn0000241	FBgn0041092	genetic_interaction
FBgn0000241	FBgn0046214	genetic_interaction
FBgn0000241	FBgn0067872	genetic_interaction
FBgn0000241	FBgn0265276	genetic_interaction
FBgn0000241	FBgn0067868	genetic_interaction
FBgn0000241	FBgn0046214	genetic_interaction
FBgn0000241	FBgn0035158	genetic_interaction
FBgn0000241	FBgn0086613	genetic_interaction
FBgn0000241	FBgn0067878	genetic_interaction
FBgn0000241	FBgn0035608	genetic_interaction
FBgn0000241	FBgn0034834	genetic_interaction
FBgn0000241	FBgn0004828	genetic_interaction
FBgn0000241	FBgn0037810	genetic_interaction
FBgn0000241	FBgn0067879	genetic_interaction
FBgn0000241	FBgn0067867	genetic_interaction
FBgn0000241	FBgn0020309	genetic_interaction
FBgn0000241	FBgn0032330	genetic_interaction
FBgn0000241	FBgn0067884	genetic_interaction
FBgn0000241	FBgn0067874	genetic_interaction
FBgn0000241	FBgn0266557	genetic_interaction
FBgn0000241	FBgn0067882	genetic_interaction
FBgn0000241	FBgn0067875	genetic_interaction
FBgn0000241	FBgn0067870	genetic_interaction
FBgn0000241	FBgn0067866	genetic_interaction
FBgn0000241	FBgn0067880	genetic_interaction
FBgn0000241	FBgn0039214	genetic_interaction
FBgn0000241	FBgn0016756	genetic_interaction
FBgn0000241	FBgn0262830	genetic_interaction
FBgn0000241	FBgn0067877	genetic_interaction
FBgn0000241	FBgn0026533	genetic_interaction
FBgn0000241	FBgn0067885	genetic_interaction
FBgn0000241	FBgn0039338	genetic_interaction
FBgn0000241	FBgn0262451	genetic_interaction
FBgn0000009	FBgn0004675	genetic_interaction
FBgn0000014	FBgn0004635	genetic_interaction
FBgn0000014	FBgn0259211	genetic_interaction
FBgn0000014	FBgn0004878	genetic_interaction
FBgn0000014	FBgn0022739	genetic_interaction
FBgn0000014	FBgn0010382	genetic_interaction
FBgn0000014	FBgn0001235	genetic_interaction
FBgn0000014	FBgn0003567	genetic_interaction
FBgn0000014	FBgn0051481	genetic_interaction
FBgn0000014	FBgn0010382	genetic_interaction
FBgn0000014	FBgn0005672	genetic_interaction
FBgn0000015	FBgn0003042	genetic_interaction
FBgn0000015	FBgn0264495	genetic_interaction
FBgn0000015	FBgn0003334	genetic_interaction
FBgn0000015	FBgn0039858	genetic_interaction
FBgn0000015	FBgn0010313	genetic_interaction
FBgn0000015	FBgn0003044	genetic_interaction
FBgn0000015	FBgn0014127	genetic_interaction
FBgn0000015	FBgn0051481	genetic_interaction
FBgn0000015	FBgn0002552	genetic_interaction
FBgn0000015	FBgn0028387	genetic_interaction
FBgn0000015	FBgn0003862	genetic_interaction
FBgn0000015	FBgn0013263	genetic_interaction
FBgn0000015	FBgn0000014	genetic_interaction
FBgn0000017	FBgn0021760	genetic_interaction
FBgn0000017	FBgn0014163	genetic_interaction
FBgn0000017	FBgn0005631	genetic_interaction
FBgn0000017	FBgn0000464	genetic_interaction
FBgn0000017	FBgn0000071	genetic_interaction
FBgn0000017	FBgn0020510	genetic_interaction
FBgn0000017	FBgn0000320	genetic_interaction
FBgn0000017	FBgn0004595	genetic_interaction
FBgn0000017	FBgn0011202	genetic_interaction
FBgn0000017	FBgn0041097	genetic_interaction
FBgn0000017	FBgn0004108	genetic_interaction
FBgn0000017	FBgn0000578	genetic_interaction
FBgn0000017	FBgn0005631	genetic_interaction
FBgn0000017	FBgn0267487	genetic_interaction
FBgn0000017	FBgn0002543	genetic_interaction
FBgn0000017	FBgn0027948	genetic_interaction
FBgn0000017	FBgn0267487	genetic_interaction
FBgn0000017	FBgn0015006	genetic_interaction
FBgn0000017	FBgn0011771	genetic_interaction
FBgn0000017	FBgn0021760	genetic_interaction
FBgn0000017	FBgn0014020	genetic_interaction
FBgn0000017	FBgn0024277	genetic_interaction
FBgn0000017	FBgn0026609	genetic_interaction
FBgn0000017	FBgn0004647	genetic_interaction
FBgn0000017	FBgn0024277	genetic_interaction
FBgn0000017	FBgn0264089	genetic_interaction
FBgn0000017	FBgn0013713	genetic_interaction
FBgn0000017	FBgn0004647	genetic_interaction
FBgn0000018	FBgn0004937	genetic_interaction
FBgn0000022	FBgn0001168	genetic_interaction
FBgn0000022	FBgn0003870	genetic_interaction
FBgn0000022	FBgn0003870	genetic_interaction
FBgn0000022	FBgn0265598	genetic_interaction
FBgn0000022	FBgn0000042	genetic_interaction
FBgn0000022	FBgn0002573	genetic_interaction
FBgn0000022	FBgn0013469	genetic_interaction
FBgn0000022	FBgn0003567	genetic_interaction
FBgn0000022	FBgn0003577	genetic_interaction
FBgn0000022	FBgn0003499	genetic_interaction
FBgn0000022	FBgn0000575	genetic_interaction
FBgn0000022	FBgn0000575	genetic_interaction
FBgn0000022	FBgn0003731	genetic_interaction
FBgn0000024	FBgn0259243	genetic_interaction
FBgn0000024	FBgn0000479	genetic_interaction
FBgn0000024	FBgn0037140	genetic_interaction
FBgn0000028	FBgn0086680	genetic_interaction
FBgn0000028	FBgn0004198	genetic_interaction
FBgn0000042	FBgn0000043	genetic_interaction
FBgn0000044	FBgn0264695	genetic_interaction
FBgn0000047	FBgn0005633	genetic_interaction
FBgn0000047	FBgn0264695	genetic_interaction
FBgn0000047	FBgn0283471	genetic_interaction
FBgn0000047	FBgn0004169	genetic_interaction
FBgn0000047	FBgn0026607	genetic_interaction
FBgn0000047	FBgn0025641	genetic_interaction
FBgn0000047	FBgn0026606	genetic_interaction
FBgn0000047	FBgn0026604	genetic_interaction
FBgn0000047	FBgn0026608	genetic_interaction
FBgn0000061	FBgn0026411	genetic_interaction
FBgn0000061	FBgn0285917	genetic_interaction
FBgn0000061	FBgn0001139	genetic_interaction
FBgn0000061	FBgn0003513	genetic_interaction
FBgn0000061	FBgn0010825	genetic_interaction
FBgn0000061	FBgn0004863	genetic_interaction
FBgn0000061	FBgn0260635	genetic_interaction
FBgn0000061	FBgn0000154	genetic_interaction
FBgn0000063	FBgn0035640	genetic_interaction
FBgn0000063	FBgn0038535	genetic_interaction
FBgn0000070	FBgn0284247	genetic_interaction
FBgn0000075	FBgn0003677	genetic_interaction
FBgn0000077	FBgn0004647	genetic_interaction
FBgn0000097	FBgn0040329	genetic_interaction
FBgn0000097	FBgn0001965	genetic_interaction
FBgn0000097	FBgn0041111	genetic_interaction
FBgn0000097	FBgn0040331	genetic_interaction
FBgn0000097	FBgn0023214	genetic_interaction
FBgn0000097	FBgn0003870	genetic_interaction
FBgn0000097	FBgn0003310	genetic_interaction
FBgn0000097	FBgn0016977	genetic_interaction
FBgn0000097	FBgn0000320	genetic_interaction
FBgn0000097	FBgn0014037	genetic_interaction
FBgn0000097	FBgn0001965	genetic_interaction
FBgn0000097	FBgn0003118	genetic_interaction
FBgn0000097	FBgn0003256	genetic_interaction
FBgn0000097	FBgn0022764	genetic_interaction
FBgn0000097	FBgn0004390	genetic_interaction
FBgn0000097	FBgn0003525	genetic_interaction
FBgn0000097	FBgn0003079	genetic_interaction
FBgn0000097	FBgn0003118	genetic_interaction
FBgn0000097	FBgn0026597	genetic_interaction
FBgn0000097	FBgn0026440	genetic_interaction
FBgn0000097	FBgn0004595	genetic_interaction
FBgn0000097	FBgn0004795	genetic_interaction
FBgn0000097	FBgn0010280	genetic_interaction
FBgn0000097	FBgn0040327	genetic_interaction
FBgn0000097	FBgn0283426	genetic_interaction
FBgn0000097	FBgn0040332	genetic_interaction
FBgn0000097	FBgn0002576	genetic_interaction
FBgn0000097	FBgn0085432	genetic_interaction
FBgn0000097	FBgn0004647	genetic_interaction
FBgn0000097	FBgn0086361	genetic_interaction
FBgn0000097	FBgn0010825	genetic_interaction
FBgn0000097	FBgn0040328	genetic_interaction
FBgn0000097	FBgn0000547	genetic_interaction
FBgn0000097	FBgn0262370	genetic_interaction
FBgn0000097	FBgn0263395	genetic_interaction
FBgn0000097	FBgn0003391	genetic_interaction
FBgn0000097	FBgn0040330	genetic_interaction
FBgn0000097	FBgn0262370	genetic_interaction
FBgn0000097	FBgn0259176	genetic_interaction
FBgn0000097	FBgn0004618	genetic_interaction
FBgn0000097	FBgn0004837	genetic_interaction
FBgn0000101	FBgn0267978	genetic_interaction
FBgn0000104	FBgn0000102	genetic_interaction
FBgn0000108	FBgn0261112	genetic_interaction
FBgn0000108	FBgn0000635	genetic_interaction
FBgn0000108	FBgn0029082	genetic_interaction
FBgn0000108	FBgn0086370	genetic_interaction
FBgn0000108	FBgn0261112	genetic_interaction
FBgn0000108	FBgn0032049	genetic_interaction
FBgn0000108	FBgn0000635	genetic_interaction
FBgn0000108	FBgn0032049	genetic_interaction
FBgn0000108	FBgn0024196	genetic_interaction
FBgn0000108	FBgn0086370	genetic_interaction
FBgn0000108	FBgn0001308	genetic_interaction
FBgn0000108	FBgn0259984	genetic_interaction
FBgn0000108	FBgn0029843	genetic_interaction
FBgn0000114	FBgn0003310	genetic_interaction
FBgn0000114	FBgn0017581	genetic_interaction
FBgn0000114	FBgn0003015	genetic_interaction
FBgn0000114	FBgn0001137	genetic_interaction
FBgn0000114	FBgn0001137	genetic_interaction
FBgn0000114	FBgn0034975	genetic_interaction
FBgn0000114	FBgn0015218	genetic_interaction
FBgn0000114	FBgn0017581	genetic_interaction
FBgn0000114	FBgn0264695	genetic_interaction
FBgn0000117	FBgn0011692	genetic_interaction
FBgn0000117	FBgn0003371	genetic_interaction
FBgn0000117	FBgn0036974	genetic_interaction
FBgn0000117	FBgn0039907	genetic_interaction
FBgn0000117	FBgn0010934	genetic_interaction
FBgn0000117	FBgn0010303	genetic_interaction
FBgn0000117	FBgn0002643	genetic_interaction
FBgn0000117	FBgn0003371	genetic_interaction
FBgn0000117	FBgn0086356	genetic_interaction
FBgn0000117	FBgn0014847	genetic_interaction
FBgn0000117	FBgn0004569	genetic_interaction
FBgn0000117	FBgn0020496	genetic_interaction
FBgn0000117	FBgn0262432	genetic_interaction
FBgn0000117	FBgn0003997	genetic_interaction
FBgn0000117	FBgn0266997	genetic_interaction
FBgn0000117	FBgn0003731	genetic_interaction
FBgn0000117	FBgn0003716	genetic_interaction
FBgn0000117	FBgn0043900	genetic_interaction
FBgn0000117	FBgn0000636	genetic_interaction
FBgn0000117	FBgn0284421	genetic_interaction
FBgn0000117	FBgn0000499	genetic_interaction
FBgn0000117	FBgn0016977	genetic_interaction
FBgn0000117	FBgn0243512	genetic_interaction
FBgn0000117	FBgn0003028	genetic_interaction
FBgn0000117	FBgn0003525	genetic_interaction
FBgn0000117	FBgn0037734	genetic_interaction
FBgn0000117	FBgn0003866	genetic_interaction
FBgn0000117	FBgn0001624	genetic_interaction
FBgn0000117	FBgn0001075	genetic_interaction
FBgn0000117	FBgn0085432	genetic_interaction
FBgn0000117	FBgn0267825	genetic_interaction
FBgn0000117	FBgn0004889	genetic_interaction
FBgn0000117	FBgn0000404	genetic_interaction
FBgn0000117	FBgn0284084	genetic_interaction
FBgn0000117	FBgn0026323	genetic_interaction
FBgn0000117	FBgn0000017	genetic_interaction
FBgn0000117	FBgn0004569	genetic_interaction
FBgn0000117	FBgn0003041	genetic_interaction
FBgn0000117	FBgn0041111	genetic_interaction
FBgn0000117	FBgn0026597	genetic_interaction
FBgn0000117	FBgn0026598	genetic_interaction
FBgn0000117	FBgn0020496	genetic_interaction
FBgn0000117	FBgn0260799	genetic_interaction
FBgn0000117	FBgn0004635	genetic_interaction
FBgn0000117	FBgn0001139	genetic_interaction
FBgn0000117	FBgn0003391	genetic_interaction
FBgn0000117	FBgn0000490	genetic_interaction
FBgn0000117	FBgn0262716	genetic_interaction
FBgn0003482	FBgn0003480	genetic_interaction
FBgn0003482	FBgn0003479	genetic_interaction
FBgn0003482	FBgn0019686	genetic_interaction
FBgn0003482	FBgn0003483	genetic_interaction
FBgn0003482	FBgn0002716	genetic_interaction
FBgn0003482	FBgn0050169	genetic_interaction
FBgn0003483	FBgn0003482	genetic_interaction
FBgn0003483	FBgn0003523	genetic_interaction
FBgn0003495	FBgn0262582	genetic_interaction
FBgn0003495	FBgn0036494	genetic_interaction
FBgn0003495	FBgn0014018	genetic_interaction
FBgn0003495	FBgn0262473	genetic_interaction
FBgn0003495	FBgn0262473	genetic_interaction
FBgn0003495	FBgn0000250	genetic_interaction
FBgn0003495	FBgn0034476	genetic_interaction
FBgn0003495	FBgn0003089	genetic_interaction
FBgn0003499	FBgn0267978	genetic_interaction
FBgn0003502	FBgn0264959	genetic_interaction
FBgn0003502	FBgn0011726	genetic_interaction
FBgn0003502	FBgn0033988	genetic_interaction
FBgn0003502	FBgn0000308	genetic_interaction
FBgn0003502	FBgn0010382	genetic_interaction
FBgn0003502	FBgn0262733	genetic_interaction
FBgn0003507	FBgn0002576	genetic_interaction
FBgn0003507	FBgn0001325	genetic_interaction
FBgn0003507	FBgn0003963	genetic_interaction
FBgn0003507	FBgn0002576	genetic_interaction
FBgn0003507	FBgn0003963	genetic_interaction
FBgn0003512	FBgn0000166	genetic_interaction
FBgn0003513	FBgn0003517	genetic_interaction
FBgn0003513	FBgn0039286	genetic_interaction
FBgn0003513	FBgn0000157	genetic_interaction
FBgn0003513	FBgn0264075	genetic_interaction
FBgn0003513	FBgn0000061	genetic_interaction
FBgn0003514	FBgn0003028	genetic_interaction
FBgn0003514	FBgn0020621	genetic_interaction
FBgn0003514	FBgn0265434	genetic_interaction
FBgn0003517	FBgn0015521	genetic_interaction
FBgn0003520	FBgn0041093	genetic_interaction
FBgn0003520	FBgn0028734	genetic_interaction
FBgn0003520	FBgn0004374	genetic_interaction
FBgn0003525	FBgn0028577	genetic_interaction
FBgn0003525	FBgn0000158	genetic_interaction
FBgn0003525	FBgn0028978	genetic_interaction
FBgn0003525	FBgn0002780	genetic_interaction
FBgn0003545	FBgn0020255	genetic_interaction
FBgn0003545	FBgn0003124	genetic_interaction
FBgn0003545	FBgn0002924	genetic_interaction
FBgn0003545	FBgn0026620	genetic_interaction
FBgn0003545	FBgn0263855	genetic_interaction
FBgn0003545	FBgn0002924	genetic_interaction
FBgn0003545	FBgn0002948	genetic_interaction
FBgn0003545	FBgn0260991	genetic_interaction
FBgn0003557	FBgn0259174	genetic_interaction
FBgn0003557	FBgn0052177	genetic_interaction
FBgn0003557	FBgn0262614	genetic_interaction
FBgn0003557	FBgn0000524	genetic_interaction
FBgn0003598	FBgn0002774	genetic_interaction
FBgn0003607	FBgn0027655	genetic_interaction
FBgn0003607	FBgn0086908	genetic_interaction
FBgn0003607	FBgn0001086	genetic_interaction
FBgn0003607	FBgn0027655	genetic_interaction
FBgn0003612	FBgn0016917	genetic_interaction
FBgn0003612	FBgn0016917	genetic_interaction
FBgn0003612	FBgn0004864	genetic_interaction
FBgn0003651	FBgn0000097	genetic_interaction
FBgn0003651	FBgn0013347	genetic_interaction
FBgn0003651	FBgn0003256	genetic_interaction
FBgn0003651	FBgn0003731	genetic_interaction
FBgn0003651	FBgn0004638	genetic_interaction
FBgn0003651	FBgn0001325	genetic_interaction
FBgn0003651	FBgn0003731	genetic_interaction
FBgn0003651	FBgn0265487	genetic_interaction
FBgn0003651	FBgn0001965	genetic_interaction
FBgn0003651	FBgn0013725	genetic_interaction
FBgn0003651	FBgn0015778	genetic_interaction
FBgn0003651	FBgn0003366	genetic_interaction
FBgn0003651	FBgn0001965	genetic_interaction
FBgn0003651	FBgn0010269	genetic_interaction
FBgn0003651	FBgn0003256	genetic_interaction
FBgn0003651	FBgn0003079	genetic_interaction
FBgn0003651	FBgn0003205	genetic_interaction
FBgn0003651	FBgn0265487	genetic_interaction
FBgn0003731	FBgn0001320	genetic_interaction
FBgn0003731	FBgn0086680	genetic_interaction
FBgn0003731	FBgn0003256	genetic_interaction
FBgn0003731	FBgn0000097	genetic_interaction
FBgn0003731	FBgn0020440	genetic_interaction
FBgn0003731	FBgn0023223	genetic_interaction
FBgn0003731	FBgn0016917	genetic_interaction
FBgn0003731	FBgn0027053	genetic_interaction
FBgn0003731	FBgn0023097	genetic_interaction
FBgn0003731	FBgn0013469	genetic_interaction
FBgn0003731	FBgn0003079	genetic_interaction
FBgn0003731	FBgn0002931	genetic_interaction
FBgn0003731	FBgn0262519	genetic_interaction
FBgn0003731	FBgn0004638	genetic_interaction
FBgn0003731	FBgn0014384	genetic_interaction
FBgn0003731	FBgn0004859	genetic_interaction
FBgn0003731	FBgn0261811	genetic_interaction
FBgn0003731	FBgn0004647	genetic_interaction
FBgn0003733	FBgn0003205	genetic_interaction
FBgn0003733	FBgn0014062	genetic_interaction
FBgn0003733	FBgn0016917	genetic_interaction
FBgn0003733	FBgn0015296	genetic_interaction
FBgn0003733	FBgn0000490	genetic_interaction
FBgn0003733	FBgn0003867	genetic_interaction
FBgn0003733	FBgn0014053	genetic_interaction
FBgn0003733	FBgn0014059	genetic_interaction
FBgn0003733	FBgn0014047	genetic_interaction
FBgn0003733	FBgn0010269	genetic_interaction
FBgn0003733	FBgn0014056	genetic_interaction
FBgn0003733	FBgn0003720	genetic_interaction
FBgn0003733	FBgn0014038	genetic_interaction
FBgn0003733	FBgn0003079	genetic_interaction
FBgn0003733	FBgn0261434	genetic_interaction
FBgn0003733	FBgn0003896	genetic_interaction
FBgn0003733	FBgn0003502	genetic_interaction
FBgn0003733	FBgn0016794	genetic_interaction
FBgn0003733	FBgn0004893	genetic_interaction
FBgn0003733	FBgn0014057	genetic_interaction
FBgn0003733	FBgn0011723	genetic_interaction
FBgn0003733	FBgn0014055	genetic_interaction
FBgn0003733	FBgn0000490	genetic_interaction
FBgn0003733	FBgn0014042	genetic_interaction
FBgn0003733	FBgn0014045	genetic_interaction
FBgn0003733	FBgn0041111	genetic_interaction
FBgn0003733	FBgn0003256	genetic_interaction
FBgn0003733	FBgn0014049	genetic_interaction
FBgn0003733	FBgn0001233	genetic_interaction
FBgn0003733	FBgn0014040	genetic_interaction
FBgn0003733	FBgn0014388	genetic_interaction
FBgn0003733	FBgn0014060	genetic_interaction
FBgn0003733	FBgn0014064	genetic_interaction
FBgn0003733	FBgn0014069	genetic_interaction
FBgn0003733	FBgn0004638	genetic_interaction
FBgn0003733	FBgn0003079	genetic_interaction
FBgn0003733	FBgn0014063	genetic_interaction
FBgn0003733	FBgn0014070	genetic_interaction
FBgn0003733	FBgn0020238	genetic_interaction
FBgn0003733	FBgn0000166	genetic_interaction
FBgn0003733	FBgn0014066	genetic_interaction
FBgn0003733	FBgn0004907	genetic_interaction
FBgn0003733	FBgn0001965	genetic_interaction
FBgn0003733	FBgn0000719	genetic_interaction
FBgn0003733	FBgn0014067	genetic_interaction
FBgn0003733	FBgn0014048	genetic_interaction
FBgn0003733	FBgn0014052	genetic_interaction
FBgn0003733	FBgn0014039	genetic_interaction
FBgn0003733	FBgn0014068	genetic_interaction
FBgn0003733	FBgn0014054	genetic_interaction
FBgn0003733	FBgn0003867	genetic_interaction
FBgn0003733	FBgn0014044	genetic_interaction
FBgn0003733	FBgn0014061	genetic_interaction
FBgn0003733	FBgn0014046	genetic_interaction
FBgn0003733	FBgn0014058	genetic_interaction
FBgn0003733	FBgn0014043	genetic_interaction
FBgn0003733	FBgn0011648	genetic_interaction
FBgn0003733	FBgn0014051	genetic_interaction
FBgn0003733	FBgn0001150	genetic_interaction
FBgn0003733	FBgn0000382	genetic_interaction
FBgn0003733	FBgn0003716	genetic_interaction
FBgn0003733	FBgn0014065	genetic_interaction
FBgn0003739	FBgn0014037	genetic_interaction
FBgn0003741	FBgn0265998	genetic_interaction
FBgn0003741	FBgn0004652	genetic_interaction
FBgn0003741	FBgn0004102	genetic_interaction
FBgn0003742	FBgn0025871	genetic_interaction
FBgn0003742	FBgn0025728	genetic_interaction
FBgn0003742	FBgn0025729	genetic_interaction
FBgn0003742	FBgn0025727	genetic_interaction
FBgn0003742	FBgn0004587	genetic_interaction
FBgn0003744	FBgn0259481	genetic_interaction
FBgn0003744	FBgn0010333	genetic_interaction
FBgn0003744	FBgn0038965	genetic_interaction
FBgn0003744	FBgn0015286	genetic_interaction
FBgn0003744	FBgn0038965	genetic_interaction
FBgn0003744	FBgn0014020	genetic_interaction
FBgn0003744	FBgn0022960	genetic_interaction
FBgn0003744	FBgn0016081	genetic_interaction
FBgn0003744	FBgn0010333	genetic_interaction
FBgn0003744	FBgn0015286	genetic_interaction
FBgn0003744	FBgn0030685	genetic_interaction
FBgn0003744	FBgn0011739	genetic_interaction
FBgn0003744	FBgn0010341	genetic_interaction
FBgn0003744	FBgn0000229	genetic_interaction
FBgn0003751	FBgn0004598	genetic_interaction
FBgn0003751	FBgn0013323	genetic_interaction
FBgn0003751	FBgn0004509	genetic_interaction
FBgn0003751	FBgn0014388	genetic_interaction
FBgn0003751	FBgn0000166	genetic_interaction
FBgn0003751	FBgn0003079	genetic_interaction
FBgn0003861	FBgn0263006	genetic_interaction
FBgn0003861	FBgn0026479	genetic_interaction
FBgn0003861	FBgn0013995	genetic_interaction
FBgn0003861	FBgn0284252	genetic_interaction
FBgn0003861	FBgn0283678	genetic_interaction
FBgn0003861	FBgn0261244	genetic_interaction
FBgn0003861	FBgn0260812	genetic_interaction
FBgn0003861	FBgn0261014	genetic_interaction
FBgn0003861	FBgn0000121	genetic_interaction
FBgn0003861	FBgn0039254	genetic_interaction
FBgn0003861	FBgn0261276	genetic_interaction
FBgn0003861	FBgn0261448	genetic_interaction
FBgn0003861	FBgn0260945	genetic_interaction
FBgn0003862	FBgn0010825	genetic_interaction
FBgn0003862	FBgn0004103	genetic_interaction
FBgn0003862	FBgn0002781	genetic_interaction
FBgn0003862	FBgn0005386	genetic_interaction
FBgn0003862	FBgn0266599	genetic_interaction
FBgn0003862	FBgn0025682	genetic_interaction
FBgn0003651	FBgn0004390	genetic_interaction
FBgn0003651	FBgn0013724	genetic_interaction
FBgn0003651	FBgn0263102	genetic_interaction
FBgn0003651	FBgn0004638	genetic_interaction
FBgn0003651	FBgn0003964	genetic_interaction
FBgn0003651	FBgn0000382	genetic_interaction
FBgn0003651	FBgn0003205	genetic_interaction
FBgn0003651	FBgn0014388	genetic_interaction
FBgn0003651	FBgn0003079	genetic_interaction
FBgn0003651	FBgn0000382	genetic_interaction
FBgn0003654	FBgn0011760	genetic_interaction
FBgn0003654	FBgn0267390	genetic_interaction
FBgn0003656	FBgn0000108	genetic_interaction
FBgn0003656	FBgn0000489	genetic_interaction
FBgn0003656	FBgn0003068	genetic_interaction
FBgn0003660	FBgn0013342	genetic_interaction
FBgn0003701	FBgn0266916	genetic_interaction
FBgn0003701	FBgn0035627	genetic_interaction
FBgn0003701	FBgn0037025	genetic_interaction
FBgn0003714	FBgn0040389	genetic_interaction
FBgn0003714	FBgn0037248	genetic_interaction
FBgn0003716	FBgn0011648	genetic_interaction
FBgn0003716	FBgn0003317	genetic_interaction
FBgn0003716	FBgn0015799	genetic_interaction
FBgn0003716	FBgn0010303	genetic_interaction
FBgn0003716	FBgn0011655	genetic_interaction
FBgn0003716	FBgn0024250	genetic_interaction
FBgn0003716	FBgn0020493	genetic_interaction
FBgn0003716	FBgn0031016	genetic_interaction
FBgn0003716	FBgn0023388	genetic_interaction
FBgn0003716	FBgn0024846	genetic_interaction
FBgn0003716	FBgn0000158	genetic_interaction
FBgn0003716	FBgn0085450	genetic_interaction
FBgn0003716	FBgn0262614	genetic_interaction
FBgn0003716	FBgn0003975	genetic_interaction
FBgn0003716	FBgn0263667	genetic_interaction
FBgn0003716	FBgn0028484	genetic_interaction
FBgn0003716	FBgn0004618	genetic_interaction
FBgn0003716	FBgn0034970	genetic_interaction
FBgn0003716	FBgn0001079	genetic_interaction
FBgn0003716	FBgn0004647	genetic_interaction
FBgn0003716	FBgn0263667	genetic_interaction
FBgn0003716	FBgn0004647	genetic_interaction
FBgn0003716	FBgn0000490	genetic_interaction
FBgn0003716	FBgn0003731	genetic_interaction
FBgn0003716	FBgn0243512	genetic_interaction
FBgn0003716	FBgn0020622	genetic_interaction
FBgn0003716	FBgn0010303	genetic_interaction
FBgn0003716	FBgn0263456	genetic_interaction
FBgn0003716	FBgn0011817	genetic_interaction
FBgn0003716	FBgn0004635	genetic_interaction
FBgn0003716	FBgn0000212	genetic_interaction
FBgn0003716	FBgn0003079	genetic_interaction
FBgn0003716	FBgn0266420	genetic_interaction
FBgn0003716	FBgn0265935	genetic_interaction
FBgn0003716	FBgn0030735	genetic_interaction
FBgn0003716	FBgn0014020	genetic_interaction
FBgn0003716	FBgn0027539	genetic_interaction
FBgn0003716	FBgn0002733	genetic_interaction
FBgn0003716	FBgn0003169	genetic_interaction
FBgn0003716	FBgn0024234	genetic_interaction
FBgn0003716	FBgn0011715	genetic_interaction
FBgn0003716	FBgn0011817	genetic_interaction
FBgn0003716	FBgn0043364	genetic_interaction
FBgn0003716	FBgn0003391	genetic_interaction
FBgn0003716	FBgn0000490	genetic_interaction
FBgn0003716	FBgn0015754	genetic_interaction
FBgn0003716	FBgn0003396	genetic_interaction
FBgn0003716	FBgn0029114	genetic_interaction
FBgn0003716	FBgn0003396	genetic_interaction
FBgn0003716	FBgn0010341	genetic_interaction
FBgn0003716	FBgn0031016	genetic_interaction
FBgn0003716	FBgn0038418	genetic_interaction
FBgn0003719	FBgn0003463	genetic_interaction
FBgn0003719	FBgn0004885	genetic_interaction
FBgn0003720	FBgn0023179	genetic_interaction
FBgn0003720	FBgn0004595	genetic_interaction
FBgn0003720	FBgn0053653	genetic_interaction
FBgn0003721	FBgn0283442	genetic_interaction
FBgn0003721	FBgn0046125	genetic_interaction
FBgn0003721	FBgn0243511	genetic_interaction
FBgn0003721	FBgn0024836	genetic_interaction
FBgn0003721	FBgn0046124	genetic_interaction
FBgn0003721	FBgn0046123	genetic_interaction
FBgn0003721	FBgn0046119	genetic_interaction
FBgn0003721	FBgn0046121	genetic_interaction
FBgn0003721	FBgn0003015	genetic_interaction
FBgn0003721	FBgn0046122	genetic_interaction
FBgn0003721	FBgn0015790	genetic_interaction
FBgn0003721	FBgn0001308	genetic_interaction
FBgn0003731	FBgn0004889	genetic_interaction
FBgn0003731	FBgn0015905	genetic_interaction
FBgn0003731	FBgn0015296	genetic_interaction
FBgn0003731	FBgn0001965	genetic_interaction
FBgn0003731	FBgn0003651	genetic_interaction
FBgn0003731	FBgn0023222	genetic_interaction
FBgn0003731	FBgn0036974	genetic_interaction
FBgn0003731	FBgn0263198	genetic_interaction
FBgn0003731	FBgn0004390	genetic_interaction
FBgn0003731	FBgn0041342	genetic_interaction
FBgn0003731	FBgn0001319	genetic_interaction
FBgn0003731	FBgn0001169	genetic_interaction
FBgn0003731	FBgn0033081	genetic_interaction
FBgn0003731	FBgn0263395	genetic_interaction
FBgn0003731	FBgn0084848	genetic_interaction
FBgn0003731	FBgn0014057	genetic_interaction
FBgn0003731	FBgn0041723	genetic_interaction
FBgn0003731	FBgn0267487	genetic_interaction
FBgn0003731	FBgn0003310	genetic_interaction
FBgn0003731	FBgn0086779	genetic_interaction
FBgn0003731	FBgn0010434	genetic_interaction
FBgn0003731	FBgn0003028	genetic_interaction
FBgn0003731	FBgn0001291	genetic_interaction
FBgn0003731	FBgn0005672	genetic_interaction
FBgn0003731	FBgn0026379	genetic_interaction
FBgn0003731	FBgn0004569	genetic_interaction
FBgn0003731	FBgn0023224	genetic_interaction
FBgn0003731	FBgn0262405	genetic_interaction
FBgn0003731	FBgn0261797	genetic_interaction
FBgn0003731	FBgn0004569	genetic_interaction
FBgn0003731	FBgn0004644	genetic_interaction
FBgn0003731	FBgn0014388	genetic_interaction
FBgn0003731	FBgn0015399	genetic_interaction
FBgn0003731	FBgn0042085	genetic_interaction
FBgn0003731	FBgn0032006	genetic_interaction
FBgn0003731	FBgn0001085	genetic_interaction
FBgn0003731	FBgn0014053	genetic_interaction
FBgn0003731	FBgn0014044	genetic_interaction
FBgn0003731	FBgn0020224	genetic_interaction
FBgn0003731	FBgn0003205	genetic_interaction
FBgn0003731	FBgn0263933	genetic_interaction
FBgn0003731	FBgn0005677	genetic_interaction
FBgn0003731	FBgn0003165	genetic_interaction
FBgn0003731	FBgn0259176	genetic_interaction
FBgn0003731	FBgn0003984	genetic_interaction
FBgn0003731	FBgn0260938	genetic_interaction
FBgn0003731	FBgn0014062	genetic_interaction
FBgn0003731	FBgn0003310	genetic_interaction
FBgn0003731	FBgn0000575	genetic_interaction
FBgn0003731	FBgn0262937	genetic_interaction
FBgn0003731	FBgn0003997	genetic_interaction
FBgn0003731	FBgn0005672	genetic_interaction
FBgn0003731	FBgn0004635	genetic_interaction
FBgn0003731	FBgn0000547	genetic_interaction
FBgn0003731	FBgn0285955	genetic_interaction
FBgn0003731	FBgn0015399	genetic_interaction
FBgn0003731	FBgn0027497	genetic_interaction
FBgn0003731	FBgn0004103	genetic_interaction
FBgn0003731	FBgn0003175	genetic_interaction
FBgn0003731	FBgn0000382	genetic_interaction
FBgn0003731	FBgn0003256	genetic_interaction
FBgn0003731	FBgn0263102	genetic_interaction
FBgn0003731	FBgn0028242	genetic_interaction
FBgn0003731	FBgn0016977	genetic_interaction
FBgn0003731	FBgn0003165	genetic_interaction
FBgn0003731	FBgn0002931	genetic_interaction
FBgn0003731	FBgn0000575	genetic_interaction
FBgn0003731	FBgn0000212	genetic_interaction
FBgn0003731	FBgn0000097	genetic_interaction
FBgn0003731	FBgn0035143	genetic_interaction
FBgn0003731	FBgn0014388	genetic_interaction
FBgn0003731	FBgn0263289	genetic_interaction
FBgn0003731	FBgn0000139	genetic_interaction
FBgn0003731	FBgn0263395	genetic_interaction
FBgn0003731	FBgn0000014	genetic_interaction
FBgn0003731	FBgn0010909	genetic_interaction
FBgn0003731	FBgn0001108	genetic_interaction
FBgn0003731	FBgn0042085	genetic_interaction
FBgn0003731	FBgn0002736	genetic_interaction
FBgn0003731	FBgn0267487	genetic_interaction
FBgn0003731	FBgn0001297	genetic_interaction
FBgn0003731	FBgn0086779	genetic_interaction
FBgn0003731	FBgn0010902	genetic_interaction
FBgn0003731	FBgn0000139	genetic_interaction
FBgn0003731	FBgn0000635	genetic_interaction
FBgn0003731	FBgn0004647	genetic_interaction
FBgn0003731	FBgn0014038	genetic_interaction
FBgn0003731	FBgn0024523	genetic_interaction
FBgn0003731	FBgn0014052	genetic_interaction
FBgn0003731	FBgn0284408	genetic_interaction
FBgn0003731	FBgn0014049	genetic_interaction
FBgn0003731	FBgn0004101	genetic_interaction
FBgn0003731	FBgn0003366	genetic_interaction
FBgn0003731	FBgn0000463	genetic_interaction
FBgn0003731	FBgn0001139	genetic_interaction
FBgn0003731	FBgn0000382	genetic_interaction
FBgn0003731	FBgn0003495	genetic_interaction
FBgn0003731	FBgn0001108	genetic_interaction
FBgn0003731	FBgn0001233	genetic_interaction
FBgn0003731	FBgn0001169	genetic_interaction
FBgn0003731	FBgn0040271	genetic_interaction
FBgn0003731	FBgn0003944	genetic_interaction
FBgn0003731	FBgn0010269	genetic_interaction
FBgn0003731	FBgn0041111	genetic_interaction
FBgn0003731	FBgn0003988	genetic_interaction
FBgn0003731	FBgn0014048	genetic_interaction
FBgn0003731	FBgn0029123	genetic_interaction
FBgn0003731	FBgn0029791	genetic_interaction
FBgn0003731	FBgn0028232	genetic_interaction
FBgn0003731	FBgn0030964	genetic_interaction
FBgn0003731	FBgn0261270	genetic_interaction
FBgn0003731	FBgn0004635	genetic_interaction
FBgn0003731	FBgn0267821	genetic_interaction
FBgn0003731	FBgn0002573	genetic_interaction
FBgn0003731	FBgn0003716	genetic_interaction
FBgn0003416	FBgn0003731	genetic_interaction
FBgn0003429	FBgn0001624	genetic_interaction
FBgn0003429	FBgn0000479	genetic_interaction
FBgn0003429	FBgn0003301	genetic_interaction
FBgn0003429	FBgn0003353	genetic_interaction
FBgn0003429	FBgn0001991	genetic_interaction
FBgn0003429	FBgn0000635	genetic_interaction
FBgn0003435	FBgn0025790	genetic_interaction
FBgn0003444	FBgn0083156	genetic_interaction
FBgn0003444	FBgn0250823	genetic_interaction
FBgn0003444	FBgn0083279	genetic_interaction
FBgn0003444	FBgn0011692	genetic_interaction
FBgn0003444	FBgn0000352	genetic_interaction
FBgn0003444	FBgn0001079	genetic_interaction
FBgn0003444	FBgn0004177	genetic_interaction
FBgn0003444	FBgn0083312	genetic_interaction
FBgn0003444	FBgn0261988	genetic_interaction
FBgn0003444	FBgn0036974	genetic_interaction
FBgn0003444	FBgn0003892	genetic_interaction
FBgn0003444	FBgn0083155	genetic_interaction
FBgn0003444	FBgn0031450	genetic_interaction
FBgn0003444	FBgn0284084	genetic_interaction
FBgn0003444	FBgn0083258	genetic_interaction
FBgn0003444	FBgn0083309	genetic_interaction
FBgn0003444	FBgn0083265	genetic_interaction
FBgn0003444	FBgn0083276	genetic_interaction
FBgn0003444	FBgn0083254	genetic_interaction
FBgn0003444	FBgn0002044	genetic_interaction
FBgn0003444	FBgn0016917	genetic_interaction
FBgn0003444	FBgn0083252	genetic_interaction
FBgn0003444	FBgn0003612	genetic_interaction
FBgn0003444	FBgn0026250	genetic_interaction
FBgn0003444	FBgn0040206	genetic_interaction
FBgn0003444	FBgn0083270	genetic_interaction
FBgn0003444	FBgn0033233	genetic_interaction
FBgn0003444	FBgn0266724	genetic_interaction
FBgn0003444	FBgn0083086	genetic_interaction
FBgn0003444	FBgn0083289	genetic_interaction
FBgn0003444	FBgn0083277	genetic_interaction
FBgn0003444	FBgn0083267	genetic_interaction
FBgn0003444	FBgn0083297	genetic_interaction
FBgn0003444	FBgn0083148	genetic_interaction
FBgn0003444	FBgn0000352	genetic_interaction
FBgn0003444	FBgn0083318	genetic_interaction
FBgn0003444	FBgn0027603	genetic_interaction
FBgn0003444	FBgn0083284	genetic_interaction
FBgn0003444	FBgn0083274	genetic_interaction
FBgn0003444	FBgn0250823	genetic_interaction
FBgn0003444	FBgn0083262	genetic_interaction
FBgn0003444	FBgn0083306	genetic_interaction
FBgn0003444	FBgn0083153	genetic_interaction
FBgn0003444	FBgn0083261	genetic_interaction
FBgn0003444	FBgn0083301	genetic_interaction
FBgn0003444	FBgn0083253	genetic_interaction
FBgn0003444	FBgn0083314	genetic_interaction
FBgn0003444	FBgn0000499	genetic_interaction
FBgn0003444	FBgn0014343	genetic_interaction
FBgn0003444	FBgn0053182	genetic_interaction
FBgn0003444	FBgn0036666	genetic_interaction
FBgn0003444	FBgn0083291	genetic_interaction
FBgn0003444	FBgn0011692	genetic_interaction
FBgn0003444	FBgn0083256	genetic_interaction
FBgn0003444	FBgn0005198	genetic_interaction
FBgn0003444	FBgn0003892	genetic_interaction
FBgn0003444	FBgn0083268	genetic_interaction
FBgn0003444	FBgn0083288	genetic_interaction
FBgn0003444	FBgn0083187	genetic_interaction
FBgn0003444	FBgn0083311	genetic_interaction
FBgn0003444	FBgn0031450	genetic_interaction
FBgn0003444	FBgn0083303	genetic_interaction
FBgn0003444	FBgn0083315	genetic_interaction
FBgn0003444	FBgn0083293	genetic_interaction
FBgn0003444	FBgn0083296	genetic_interaction
FBgn0003444	FBgn0264492	genetic_interaction
FBgn0003444	FBgn0083285	genetic_interaction
FBgn0003444	FBgn0083260	genetic_interaction
FBgn0003444	FBgn0083292	genetic_interaction
FBgn0003444	FBgn0083264	genetic_interaction
FBgn0003444	FBgn0083308	genetic_interaction
FBgn0003444	FBgn0004859	genetic_interaction
FBgn0003444	FBgn0083251	genetic_interaction
FBgn0003444	FBgn0083275	genetic_interaction
FBgn0003444	FBgn0083259	genetic_interaction
FBgn0003444	FBgn0083269	genetic_interaction
FBgn0003444	FBgn0083151	genetic_interaction
FBgn0003444	FBgn0039709	genetic_interaction
FBgn0003444	FBgn0083316	genetic_interaction
FBgn0003444	FBgn0083272	genetic_interaction
FBgn0003444	FBgn0003716	genetic_interaction
FBgn0003444	FBgn0083282	genetic_interaction
FBgn0003444	FBgn0083290	genetic_interaction
FBgn0003444	FBgn0083317	genetic_interaction
FBgn0003444	FBgn0264922	genetic_interaction
FBgn0003444	FBgn0083298	genetic_interaction
FBgn0003444	FBgn0083149	genetic_interaction
FBgn0003444	FBgn0083273	genetic_interaction
FBgn0003444	FBgn0083249	genetic_interaction
FBgn0003444	FBgn0083283	genetic_interaction
FBgn0003444	FBgn0083313	genetic_interaction
FBgn0003444	FBgn0015903	genetic_interaction
FBgn0003444	FBgn0004644	genetic_interaction
FBgn0003444	FBgn0083271	genetic_interaction
FBgn0003444	FBgn0083154	genetic_interaction
FBgn0003444	FBgn0083305	genetic_interaction
FBgn0003444	FBgn0001079	genetic_interaction
FBgn0003444	FBgn0083280	genetic_interaction
FBgn0003444	FBgn0083300	genetic_interaction
FBgn0003444	FBgn0083302	genetic_interaction
FBgn0003444	FBgn0083310	genetic_interaction
FBgn0003444	FBgn0083257	genetic_interaction
FBgn0003444	FBgn0083266	genetic_interaction
FBgn0003444	FBgn0083281	genetic_interaction
FBgn0003444	FBgn0083294	genetic_interaction
FBgn0003444	FBgn0037703	genetic_interaction
FBgn0003444	FBgn0083299	genetic_interaction
FBgn0003444	FBgn0010602	genetic_interaction
FBgn0003444	FBgn0083263	genetic_interaction
FBgn0003444	FBgn0083307	genetic_interaction
FBgn0003444	FBgn0083278	genetic_interaction
FBgn0003444	FBgn0083250	genetic_interaction
FBgn0003444	FBgn0083152	genetic_interaction
FBgn0003444	FBgn0011648	genetic_interaction
FBgn0003444	FBgn0083187	genetic_interaction
FBgn0003444	FBgn0083287	genetic_interaction
FBgn0003444	FBgn0083304	genetic_interaction
FBgn0003444	FBgn0083150	genetic_interaction
FBgn0003444	FBgn0083295	genetic_interaction
FBgn0003444	FBgn0083286	genetic_interaction
FBgn0003447	FBgn0262111	genetic_interaction
FBgn0003447	FBgn0003187	genetic_interaction
FBgn0003447	FBgn0003187	genetic_interaction
FBgn0003447	FBgn0002577	genetic_interaction
FBgn0003448	FBgn0005771	genetic_interaction
FBgn0003448	FBgn0004050	genetic_interaction
FBgn0003448	FBgn0069081	genetic_interaction
FBgn0003449	FBgn0264270	genetic_interaction
FBgn0003449	FBgn0264270	genetic_interaction
FBgn0003450	FBgn0003089	genetic_interaction
FBgn0003459	FBgn0011706	genetic_interaction
FBgn0003459	FBgn0003165	genetic_interaction
FBgn0003459	FBgn0003997	genetic_interaction
FBgn0003459	FBgn0039044	genetic_interaction
FBgn0003459	FBgn0002962	genetic_interaction
FBgn0003459	FBgn0015946	genetic_interaction
FBgn0003459	FBgn0036786	genetic_interaction
FBgn0003460	FBgn0261617	genetic_interaction
FBgn0003460	FBgn0027364	genetic_interaction
FBgn0003460	FBgn0250823	genetic_interaction
FBgn0003460	FBgn0000662	genetic_interaction
FBgn0003460	FBgn0261617	genetic_interaction
FBgn0003460	FBgn0266343	genetic_interaction
FBgn0003460	FBgn0004618	genetic_interaction
FBgn0003460	FBgn0000320	genetic_interaction
FBgn0003460	FBgn0025680	genetic_interaction
FBgn0003462	FBgn0010213	genetic_interaction
FBgn0003462	FBgn0031972	genetic_interaction
FBgn0003463	FBgn0003716	genetic_interaction
FBgn0003463	FBgn0004657	genetic_interaction
FBgn0003463	FBgn0003716	genetic_interaction
FBgn0003463	FBgn0003328	genetic_interaction
FBgn0003463	FBgn0002526	genetic_interaction
FBgn0003463	FBgn0031016	genetic_interaction
FBgn0003463	FBgn0004635	genetic_interaction
FBgn0003463	FBgn0000299	genetic_interaction
FBgn0003463	FBgn0004885	genetic_interaction
FBgn0003463	FBgn0000490	genetic_interaction
FBgn0003463	FBgn0011655	genetic_interaction
FBgn0003463	FBgn0001083	genetic_interaction
FBgn0003463	FBgn0004456	genetic_interaction
FBgn0003463	FBgn0029006	genetic_interaction
FBgn0003463	FBgn0266136	genetic_interaction
FBgn0003463	FBgn0004657	genetic_interaction
FBgn0003463	FBgn0011648	genetic_interaction
FBgn0003463	FBgn0005632	genetic_interaction
FBgn0003463	FBgn0024234	genetic_interaction
FBgn0003463	FBgn0000490	genetic_interaction
FBgn0003463	FBgn0000395	genetic_interaction
FBgn0003463	FBgn0011655	genetic_interaction
FBgn0003463	FBgn0031016	genetic_interaction
FBgn0003463	FBgn0003865	genetic_interaction
FBgn0003466	FBgn0003575	genetic_interaction
FBgn0003466	FBgn0004648	genetic_interaction
FBgn0003475	FBgn0000256	genetic_interaction
FBgn0003475	FBgn0000286	genetic_interaction
FBgn0003479	FBgn0003227	genetic_interaction
FBgn0003479	FBgn0002905	genetic_interaction
FBgn0003479	FBgn0002716	genetic_interaction
FBgn0003479	FBgn0030506	genetic_interaction
FBgn0003479	FBgn0003482	genetic_interaction
FBgn0003479	FBgn0028717	genetic_interaction
FBgn0003479	FBgn0026250	genetic_interaction
FBgn0003479	FBgn0050169	genetic_interaction
FBgn0003479	FBgn0019686	genetic_interaction
FBgn0003479	FBgn0002905	genetic_interaction
FBgn0003480	FBgn0004367	genetic_interaction
FBgn0003480	FBgn0028581	genetic_interaction
FBgn0003480	FBgn0002716	genetic_interaction
FBgn0003480	FBgn0026417	genetic_interaction
FBgn0003480	FBgn0026250	genetic_interaction
FBgn0003480	FBgn0002709	genetic_interaction
FBgn0003480	FBgn0038767	genetic_interaction
FBgn0003480	FBgn0019686	genetic_interaction
FBgn0003480	FBgn0039858	genetic_interaction
FBgn0003480	FBgn0016036	genetic_interaction
FBgn0003480	FBgn0028717	genetic_interaction
FBgn0003480	FBgn0003482	genetic_interaction
FBgn0003480	FBgn0002709	genetic_interaction
FBgn0003482	FBgn0004367	genetic_interaction
FBgn0011715	FBgn0005386	genetic_interaction
FBgn0011715	FBgn0000212	genetic_interaction
FBgn0011715	FBgn0004859	genetic_interaction
FBgn0011715	FBgn0025825	genetic_interaction
FBgn0011715	FBgn0261823	genetic_interaction
FBgn0011715	FBgn0037703	genetic_interaction
FBgn0011715	FBgn0004583	genetic_interaction
FBgn0011715	FBgn0003310	genetic_interaction
FBgn0011715	FBgn0004101	genetic_interaction
FBgn0011715	FBgn0264495	genetic_interaction
FBgn0011715	FBgn0031759	genetic_interaction
FBgn0011715	FBgn0038948	genetic_interaction
FBgn0011715	FBgn0015805	genetic_interaction
FBgn0011715	FBgn0003277	genetic_interaction
FBgn0011715	FBgn0016917	genetic_interaction
FBgn0011715	FBgn0000394	genetic_interaction
FBgn0011715	FBgn0004107	genetic_interaction
FBgn0011715	FBgn0037659	genetic_interaction
FBgn0011715	FBgn0262976	genetic_interaction
FBgn0011715	FBgn0000490	genetic_interaction
FBgn0011715	FBgn0243512	genetic_interaction
FBgn0011715	FBgn0035166	genetic_interaction
FBgn0011715	FBgn0004647	genetic_interaction
FBgn0011715	FBgn0004583	genetic_interaction
FBgn0011715	FBgn0000629	genetic_interaction
FBgn0011715	FBgn0010313	genetic_interaction
FBgn0011715	FBgn0266557	genetic_interaction
FBgn0011715	FBgn0014037	genetic_interaction
FBgn0011715	FBgn0036004	genetic_interaction
FBgn0011715	FBgn0027655	genetic_interaction
FBgn0011715	FBgn0023224	genetic_interaction
FBgn0011715	FBgn0266570	genetic_interaction
FBgn0011715	FBgn0002573	genetic_interaction
FBgn0011715	FBgn0001139	genetic_interaction
FBgn0011715	FBgn0005386	genetic_interaction
FBgn0011715	FBgn0003175	genetic_interaction
FBgn0011715	FBgn0002931	genetic_interaction
FBgn0011715	FBgn0010315	genetic_interaction
FBgn0011715	FBgn0003731	genetic_interaction
FBgn0011715	FBgn0086384	genetic_interaction
FBgn0011715	FBgn0264442	genetic_interaction
FBgn0011715	FBgn0285917	genetic_interaction
FBgn0011715	FBgn0000212	genetic_interaction
FBgn0011715	FBgn0266599	genetic_interaction
FBgn0011715	FBgn0000229	genetic_interaction
FBgn0011715	FBgn0262127	genetic_interaction
FBgn0011723	FBgn0000659	genetic_interaction
FBgn0011725	FBgn0026206	genetic_interaction
FBgn0011725	FBgn0000158	genetic_interaction
FBgn0011725	FBgn0002962	genetic_interaction
FBgn0011725	FBgn0003165	genetic_interaction
FBgn0011725	FBgn0000404	genetic_interaction
FBgn0011726	FBgn0261458	genetic_interaction
FBgn0011726	FBgn0261458	genetic_interaction
FBgn0011737	FBgn0028978	genetic_interaction
FBgn0011737	FBgn0004367	genetic_interaction
FBgn0011737	FBgn0019686	genetic_interaction
FBgn0011737	FBgn0003302	genetic_interaction
FBgn0011737	FBgn0004106	genetic_interaction
FBgn0011739	FBgn0004583	genetic_interaction
FBgn0011739	FBgn0038965	genetic_interaction
FBgn0011739	FBgn0004106	genetic_interaction
FBgn0011739	FBgn0036373	genetic_interaction
FBgn0011739	FBgn0003345	genetic_interaction
FBgn0011739	FBgn0036318	genetic_interaction
FBgn0011739	FBgn0029006	genetic_interaction
FBgn0011739	FBgn0038965	genetic_interaction
FBgn0011739	FBgn0031698	genetic_interaction
FBgn0011739	FBgn0034970	genetic_interaction
FBgn0011739	FBgn0000404	genetic_interaction
FBgn0011739	FBgn0031030	genetic_interaction
FBgn0011739	FBgn0039254	genetic_interaction
FBgn0011739	FBgn0011570	genetic_interaction
FBgn0011739	FBgn0004583	genetic_interaction
FBgn0011739	FBgn0262081	genetic_interaction
FBgn0011739	FBgn0011642	genetic_interaction
FBgn0011758	FBgn0003205	genetic_interaction
FBgn0011758	FBgn0001965	genetic_interaction
FBgn0011758	FBgn0001965	genetic_interaction
FBgn0011758	FBgn0004638	genetic_interaction
FBgn0011758	FBgn0003079	genetic_interaction
FBgn0011758	FBgn0003118	genetic_interaction
FBgn0011758	FBgn0003731	genetic_interaction
FBgn0011758	FBgn0003205	genetic_interaction
FBgn0011758	FBgn0000097	genetic_interaction
FBgn0011758	FBgn0003366	genetic_interaction
FBgn0011829	FBgn0003525	genetic_interaction
FBgn0011829	FBgn0028242	genetic_interaction
FBgn0011829	FBgn0027971	genetic_interaction
FBgn0011829	FBgn0262733	genetic_interaction
FBgn0011829	FBgn0004103	genetic_interaction
FBgn0011829	FBgn0084423	genetic_interaction
FBgn0011829	FBgn0263289	genetic_interaction
FBgn0011829	FBgn0041100	genetic_interaction
FBgn0011829	FBgn0001965	genetic_interaction
FBgn0011829	FBgn0085159	genetic_interaction
FBgn0011829	FBgn0084840	genetic_interaction
FBgn0011837	FBgn0036239	genetic_interaction
FBgn0012058	FBgn0003124	genetic_interaction
FBgn0012058	FBgn0004889	genetic_interaction
FBgn0013250	FBgn0002781	genetic_interaction
FBgn0013263	FBgn0000541	genetic_interaction
FBgn0013263	FBgn0002781	genetic_interaction
FBgn0013263	FBgn0005616	genetic_interaction
FBgn0013263	FBgn0017430	genetic_interaction
FBgn0013263	FBgn0010313	genetic_interaction
FBgn0013263	FBgn0005616	genetic_interaction
FBgn0013263	FBgn0038872	genetic_interaction
FBgn0013263	FBgn0005617	genetic_interaction
FBgn0013272	FBgn0004647	genetic_interaction
FBgn0013272	FBgn0000463	genetic_interaction
FBgn0013272	FBgn0003326	genetic_interaction
FBgn0013323	FBgn0003867	genetic_interaction
FBgn0013342	FBgn0003660	genetic_interaction
FBgn0013343	FBgn0028671	genetic_interaction
FBgn0013343	FBgn0266557	genetic_interaction
FBgn0013343	FBgn0031453	genetic_interaction
FBgn0013343	FBgn0083235	genetic_interaction
FBgn0013343	FBgn0004179	genetic_interaction
FBgn0013343	FBgn0083241	genetic_interaction
FBgn0013343	FBgn0033912	genetic_interaction
FBgn0013343	FBgn0031661	genetic_interaction
FBgn0013343	FBgn0022343	genetic_interaction
FBgn0013343	FBgn0086784	genetic_interaction
FBgn0013343	FBgn0083242	genetic_interaction
FBgn0013343	FBgn0000097	genetic_interaction
FBgn0013343	FBgn0028400	genetic_interaction
FBgn0013343	FBgn0083234	genetic_interaction
FBgn0011829	FBgn0029891	genetic_interaction
FBgn0013343	FBgn0017558	genetic_interaction
FBgn0013343	FBgn0000043	genetic_interaction
FBgn0013343	FBgn0034240	genetic_interaction
FBgn0013343	FBgn0032157	genetic_interaction
FBgn0013343	FBgn0083232	genetic_interaction
FBgn0013343	FBgn0083236	genetic_interaction
FBgn0013348	FBgn0033027	genetic_interaction
FBgn0013433	FBgn0034013	genetic_interaction
FBgn0013433	FBgn0000635	genetic_interaction
FBgn0013433	FBgn0000635	genetic_interaction
FBgn0013433	FBgn0264975	genetic_interaction
FBgn0013433	FBgn0028644	genetic_interaction
FBgn0013469	FBgn0000117	genetic_interaction
FBgn0013469	FBgn0026598	genetic_interaction
FBgn0013469	FBgn0010300	genetic_interaction
FBgn0013469	FBgn0004647	genetic_interaction
FBgn0013672	FBgn0003360	genetic_interaction
FBgn0013674	FBgn0284252	genetic_interaction
FBgn0013717	FBgn0002284	genetic_interaction
FBgn0013717	FBgn0027655	genetic_interaction
FBgn0013718	FBgn0015790	genetic_interaction
FBgn0013718	FBgn0002121	genetic_interaction
FBgn0013724	FBgn0003256	genetic_interaction
FBgn0013724	FBgn0013725	genetic_interaction
FBgn0013724	FBgn0041111	genetic_interaction
FBgn0013724	FBgn0261270	genetic_interaction
FBgn0013724	FBgn0264959	genetic_interaction
FBgn0013724	FBgn0000382	genetic_interaction
FBgn0013724	FBgn0286070	genetic_interaction
FBgn0013724	FBgn0001233	genetic_interaction
FBgn0013724	FBgn0016744	genetic_interaction
FBgn0013724	FBgn0000097	genetic_interaction
FBgn0013724	FBgn0000261	genetic_interaction
FBgn0013724	FBgn0019804	genetic_interaction
FBgn0013724	FBgn0020238	genetic_interaction
FBgn0013724	FBgn0003310	genetic_interaction
FBgn0013724	FBgn0004177	genetic_interaction
FBgn0013724	FBgn0016977	genetic_interaction
FBgn0013724	FBgn0000547	genetic_interaction
FBgn0013724	FBgn0010269	genetic_interaction
FBgn0013724	FBgn0013347	genetic_interaction
FBgn0013725	FBgn0000591	genetic_interaction
FBgn0013725	FBgn0003410	genetic_interaction
FBgn0013725	FBgn0087003	genetic_interaction
FBgn0013725	FBgn0037037	genetic_interaction
FBgn0013725	FBgn0087003	genetic_interaction
FBgn0013725	FBgn0013820	genetic_interaction
FBgn0013725	FBgn0002744	genetic_interaction
FBgn0013725	FBgn0001981	genetic_interaction
FBgn0013725	FBgn0067779	genetic_interaction
FBgn0013726	FBgn0260635	genetic_interaction
FBgn0013726	FBgn0000229	genetic_interaction
FBgn0013726	FBgn0260635	genetic_interaction
FBgn0013726	FBgn0034970	genetic_interaction
FBgn0013733	FBgn0036896	genetic_interaction
FBgn0013733	FBgn0000229	genetic_interaction
FBgn0013733	FBgn0250753	genetic_interaction
FBgn0013733	FBgn0001297	genetic_interaction
FBgn0013750	FBgn0086782	genetic_interaction
FBgn0013751	FBgn0013764	genetic_interaction
FBgn0013756	FBgn0004595	genetic_interaction
FBgn0013756	FBgn0035640	genetic_interaction
FBgn0013756	FBgn0026598	genetic_interaction
FBgn0013756	FBgn0000063	genetic_interaction
FBgn0013759	FBgn0038975	genetic_interaction
FBgn0013759	FBgn0264607	genetic_interaction
FBgn0013764	FBgn0261885	genetic_interaction
FBgn0013764	FBgn0000117	genetic_interaction
FBgn0013764	FBgn0001123	genetic_interaction
FBgn0013764	FBgn0267978	genetic_interaction
FBgn0013764	FBgn0085432	genetic_interaction
FBgn0013764	FBgn0038294	genetic_interaction
FBgn0013764	FBgn0015221	genetic_interaction
FBgn0013764	FBgn0039907	genetic_interaction
FBgn0013764	FBgn0002440	genetic_interaction
FBgn0013764	FBgn0029096	genetic_interaction
FBgn0013764	FBgn0035983	genetic_interaction
FBgn0013764	FBgn0003963	genetic_interaction
FBgn0013764	FBgn0261885	genetic_interaction
FBgn0013725	FBgn0003870	genetic_interaction
FBgn0013725	FBgn0003870	genetic_interaction
FBgn0013725	FBgn0041111	genetic_interaction
FBgn0013725	FBgn0015371	genetic_interaction
FBgn0011760	FBgn0001108	genetic_interaction
FBgn0011760	FBgn0261797	genetic_interaction
FBgn0011760	FBgn0260945	genetic_interaction
FBgn0011763	FBgn0263864	genetic_interaction
FBgn0011763	FBgn0027885	genetic_interaction
FBgn0011766	FBgn0265623	genetic_interaction
FBgn0011766	FBgn0011763	genetic_interaction
FBgn0011766	FBgn0262773	genetic_interaction
FBgn0011766	FBgn0262768	genetic_interaction
FBgn0011766	FBgn0003042	genetic_interaction
FBgn0011766	FBgn0266557	genetic_interaction
FBgn0011766	FBgn0040071	genetic_interaction
FBgn0011766	FBgn0003334	genetic_interaction
FBgn0011766	FBgn0260635	genetic_interaction
FBgn0011766	FBgn0262519	genetic_interaction
FBgn0011766	FBgn0262434	genetic_interaction
FBgn0011766	FBgn0002521	genetic_interaction
FBgn0011766	FBgn0000212	genetic_interaction
FBgn0011766	FBgn0027655	genetic_interaction
FBgn0011766	FBgn0262771	genetic_interaction
FBgn0011766	FBgn0002441	genetic_interaction
FBgn0011766	FBgn0000581	genetic_interaction
FBgn0011766	FBgn0261823	genetic_interaction
FBgn0011766	FBgn0020887	genetic_interaction
FBgn0011766	FBgn0261823	genetic_interaction
FBgn0011766	FBgn0015799	genetic_interaction
FBgn0011766	FBgn0011763	genetic_interaction
FBgn0011766	FBgn0265623	genetic_interaction
FBgn0011766	FBgn0085432	genetic_interaction
[truncated: 84,874 more rows]
