# Supplementary material for: Genetic architecture of natural variation of cardiac performance from flies to humans
Source: eLife. 2022 Nov 16;11:e82459. doi: 10.7554/eLife.82459 (PMC9668334; doi:10.7554/eLife.82459)
Supplement: Figure 2—source data 2. — (Heart-specific RNAi validations and tests for genetic interactions among BMP members.) [file elife-82459-fig2-data2.xlsx]

## Sheet: read me
Dataset S5	sheet name	description
	sog_snoo	raw data for snoo/+; sog/+ and snoo/sog flies (Figure 2E and Figure S4A)
	babo_spp	raw data for babo/+; dpp/+ and babo/dpp flies (Figure 2E and Figure S4B)
	line_info…	details of tested genes, and corresponding RNAi lines and controls
	data_....	SOHA output file from RNAi experiments, with corresponding date-matched and/or genotype-matched controls. GWASpositivegenes: genes slected from GWAS experiments (Figure 2C). Random: genes selected randomly (Figure S3)
	line_Info_TF	details of tested TFs, and corresponding RNAi lines and controls
	TF_ ….	normalized data for tested TFs, by cardiac trait. (Figure S5)
	poxm_sr	normalized data for poxm and sr (Figure 4A)

## Sheet: sog_snoo
File.Name	Scale.Factor	GenoType	ID	Comments	Age	Sex	Type	Heart.Rate.Mean	Heart.Rate.Median	Heart.Rate.Stddev	Heart.Rate.SDonMean				Heart.Period.Mean	Heart.Period.Median	Heart.Period.Stddev	Heart.Period.SDonMean				Diastolic.Interval.Mean	Diastolic.Interval.Median	Diastolic.Interval.Stddev	Diastolic.Interval.SDonMean	DIonHPmean	Diastolic.Interval.TotalTime				Systolic.Interval.Mean	Systolic.Interval.Median	Systolic.Interval.Stddev	Systolic.Interval.SDonMean	SIonHPmean	Systolic.Interval.TotalTime	SIAI		Arrhythmia.Index	SIMean.on.DIMean	1st.Diastolic.Diameter.Vertical	2nd.Diastolic.Diameter.Vertical	Avg.Diastolic.Diameter	1st.Systolic.Diameter.Vertical	2nd.Systolic.Diameter.Vertical	Avg.Systolic.Diameter	Fractional.Shortening	1stDiastolicHorizontal	DiastolicSurfaceArea(mm^2)
5394x9709_01_1wf_C11440_30s_041218	0.637	Snooxsog	1	41218	1	f	mutant	2.63237	2.61479	0.16291	0.0623034				0.381259	0.382441	0.0225625	0.0589961				0.217999	0.221797	0.0214394	0.0966623	0.571786	17.0039				0.163374	0.160633	0.00561045	0.0349271	0.428511	12.7431			0.0589961	0.749425	74.6269	76.3231	75.475	47.775	52.1757	49.9754	0.337856
5394x9709_02_1wf_C11440_30s_041218	0.637	Snooxsog	2	41218	1	f	mutant	3.96293	3.96165	0.277828	0.0701294				0.253725	0.25242	0.0203198	0.0805				0.116615	0.114742	0.0101297	0.0882822	0.459613	13.7606				0.137094	0.145296	0.0211308	0.145433	0.540324	16.04			0.0805	1.17561	72.699	65.2669	68.9829	41.0111	39.0289	40.02	0.419856
5394x9709_03_1wf_C11440_30s_041218	0.637	Snooxsog	3	41218	1	f	mutant	2.62252	2.61472	0.0791365	0.0302658				0.381657	0.38245	0.0114961	0.0300592				0.202305	0.198887	0.014308	0.0719402	0.53007	15.7798				0.178969	0.183538	0.00716614	0.0390443	0.468927	13.9596			0.0300592	0.884651	80.2721	72.6124	76.4423	58.6075	56.7073	57.6574	0.245739
5394x9709_04_1wf_C11440_30s_041218	0.637	Snooxsog	4	41218	1	f	mutant	2.98218	2.97131	0.118706	0.0399507				0.335862	0.336552	0.0135941	0.0403923				0.183232	0.183576	0.0110577	0.060235	0.545558	16.3077				0.152379	0.152984	0.00949051	0.0620361	0.453696	13.5618			0.0403923	0.831617	73.2993	60.1518	66.7256	49.1977	45.5889	47.3933	0.289728
5394x9709_05_1wf_C11440_30s_041218	0.637	Snooxsog	5	41218	1	f	mutant	3.93168	4.0848	0.489577	0.119853				0.260201	0.25238	0.0506717	0.200775				0.0825959	0.0841341	0.00984678	0.117037	0.317431	9.41593				0.177524	0.16827	0.0498237	0.296093	0.682257	20.4153			0.200775	2.14931	80.2721		80.2721	53.1809		53.1809	0.337492
5394x9709_06_1wf_C11440_30s_041218	0.637	Snooxsog	6	41218	1	f	mutant	3.55732	3.53337	0.162569	0.0460096				0.28163	0.283016	0.0115909	0.040955				0.116775	0.122372	0.0126846	0.103657	0.414639	12.2613				0.16496	0.160662	0.00694806	0.0432465	0.585732	17.4857			0.040955	1.41263	83.5345		83.5345	56.5748		56.5748	0.322737
5394x9709_07_1wf_C11440_30s_041218	0.637	Snooxsog	7	41218	1	f	mutant	3.564	3.53371	0.0734037	0.0207724				0.280683	0.282989	0.00577395	0.0204035				0.118705	0.11474	0.00789734	0.0688279	0.422916	12.5828				0.161783	0.160631	0.00656271	0.0408557	0.576391	17.149			0.0204035	1.3629	65.0021		65.0021	48.9165		48.9165	0.247463
5394x9709_08_1wf_C11440_30s_041218	0.637	Snooxsog	8	41218	1	f	mutant	3.05072	3.04037	0.0742102	0.0244082				0.327973	0.328907	0.0076065	0.0231266				0.151382	0.152981	0.00739267	0.0483242	0.461567	13.7757				0.17644	0.175928	0.00411398	0.0233844	0.537969	15.8796			0.0231266	1.16553	76.6653		76.6653	52.9055		52.9055	0.309915
5394x9709_09_1wf_C11440_30s_041218	0.637	Snooxsog	9	41218	1	f	mutant	3.4592	3.44075	0.396145	0.115133				0.294182	0.290635	0.046047	0.158436				0.110496	0.107115	0.0118572	0.110696	0.375605	11.1601				0.183575	0.175932	0.0402207	0.228615	0.624018	18.541			0.158436	1.66137	71.7184		71.7184	47.4341		47.4341	0.338607
5394x9709_10_1wf_C11440_30s_041218	0.637	Snooxsog	10	41218	1	f	mutant	3.47525	3.44075	0.0904486	0.0262875				0.287915	0.290634	0.00741455	0.0255116				0.143202	0.145328	0.00691542	0.0475849	0.497375	14.893				0.144734	0.145328	0.00238163	0.0163879	0.502696	14.9076			0.0255116	1.0107	77.4551		77.4551	54.2461		54.2461	0.299645
5394x9709_11_1wf_C11440_30s_041218	0.637	Snooxsog	11	41218	1	f	mutant	2.44708	2.42101	0.2885	0.119165				0.413478	0.41305	0.0418572	0.101337				0.246256	0.252377	0.0391452	0.155106	0.595571	17.7304				0.166791	0.168268	0.00754059	0.0448129	0.403385	12.009			0.101337	0.677308	84.7808		84.7808	60.8493		60.8493	0.282275
5394x9709_12_1wf_C11440_30s_041218	0.637	Snooxsog	12	41218	1	f	mutant	1.97938	1.92257	0.240617	0.125154				0.511143	0.520136	0.0518726	0.099729				0.36135	0.367157	0.0527295	0.143616	0.706946	20.9583				0.151398	0.152979	0.00751489	0.0491237	0.296195	8.78109			0.099729	0.418979	68.5981		68.5981	53.1809		53.1809	0.224747
5394x9709_13_1wf_C11440_30s_041218	0.637	Snooxsog	13	41218	1	f	mutant	2.35184	2.37701	0.178108	0.0749292				0.428789	0.420696	0.0505135	0.120071				0.275148	0.275358	0.0500755	0.181856	0.641686	19.2604				0.152758	0.152979	0.00736876	0.0481684	0.356254	10.5403			0.120071	0.555184	73.4569		73.4569	49.8328		49.8328	0.321605
5394x9709_14_1wf_C11440_30s_041218	0.637	Snooxsog	14	41218	1	f	mutant	3.61115	3.63118	0.109273	0.0300928				0.277152	0.275393	0.00799134	0.029018				0.132108	0.137586	0.0106625	0.0774967	0.476664	14.1356				0.144976	0.145329	0.00628677	0.043259	0.523091	15.6574			0.029018	1.0974	77.1191		77.1191	58.6905		58.6905	0.238963
5394x9709_15_1wf_C11440_30s_041218	0.637	Snooxsog	15	41218	1	f	mutant	2.58753	2.37705	0.689587	0.290102				0.413586	0.420689	0.118535	0.281764				0.238292	0.267708	0.0866989	0.323856	0.57616	17.157				0.175924	0.160629	0.0783859	0.487993	0.425362	12.4906			0.281764	0.738272	79.6887	77.1007	78.3947	52.8748	50.96	51.9174	0.337743
9709x5394_01_1wf_C11440_30s_061218	0.637	Snooxsog	1	61218	1	f	mutant	2.21468	2.17899	0.122708	0.0563142				0.452703	0.458929	0.022984	0.0500818				0.269013	0.275362	0.022084	0.0801999	0.594238	17.4859				0.183688	0.183576	0.00339514	0.0184945	0.405759	12.1234			0.0500818	0.682822	77.2059		77.2059	50.3593		50.3593	0.347727
9709x5394_03_1wf_C11440_30s_061218	0.637	Snooxsog	3	61218	1	f	mutant	2.87746	2.84236	0.370135	0.130221				0.442043	0.35182	0.805751	2.29024				0.158691	0.168249	0.0213785	0.127065	0.358995	10.6323				0.281772	0.183577	0.805146	4.38589	0.637431	19.1605			2.29024	1.7756	91.907		91.907	68.796		68.796	0.251461
9709x5394_04_1wf_C11440_30s_061218	0.637	Snooxsog	4	61218	1	f	mutant	3.79948	3.84482	0.0706096	0.0183648				0.263247	0.26009	0.0049165	0.0189031				0.0815666	0.0841293	0.0047679	0.0566735	0.309848	9.21703				0.181681	0.183571	0.00380477	0.0207264	0.690152	20.5299			0.0189031	2.22739	87.3828		87.3828	55.5981		55.5981	0.363741
9709x5394_05_1wf_C11440_30s_061218	0.637	Snooxsog	5	61218	1	f	mutant	3.34206	3.35223	0.2016	0.0601391				0.300629	0.298309	0.0241887	0.0810859				0.148266	0.145336	0.0234936	0.16165	0.493186	14.6783				0.152363	0.152979	0.00497854	0.0325439	0.506814	15.084			0.0810859	1.02763	79.6428	88.6552	84.149	54.7857	63.2525	59.0191	0.298636
9709x5394_06_1wf_C11440_30s_061218	0.637	Snooxsog	6	61218	1	f	mutant	1.66073	1.67601	0.0589181	0.0351538				0.602866	0.596654	0.0220086	0.0368866				0.447546	0.451247	0.0216292	0.0479319	0.742365	21.9298				0.155319	0.152985	0.00500128	0.0326914	0.257635	7.61063			0.0368866	0.347046	85.0103		85.0103	58.6594		58.6594	0.309973
9709x5394_07_1wf_C11440_30s_061218	0.637	Snooxsog	7	61218	1	f	mutant	2.57285	2.51435	0.437406	0.173963				0.399505	0.397726	0.0653479	0.164304				0.234845	0.229502	0.0640171	0.278939	0.587841	17.3786				0.164606	0.168251	0.00726887	0.0432025	0.412024	12.3454			0.164304	0.700911	68.9404		68.9404	50.4237		50.4237	0.26859
9709x5394_09_1wf_C11440_30s_061218	0.637	Snooxsog	9	61218	1	f	mutant	1.85426	1.86763	0.127269	0.0681446				0.541804	0.535456	0.0373661	0.0697837				0.328622	0.328906	0.028696	0.0872469	0.606534	17.7456				0.212922	0.206528	0.0168809	0.0817369	0.392987	11.7107			0.0697837	0.647923	85.4174		85.4174	54.782		54.782	0.358655
9709x5394_10_1wf_C11440_30s_061218	0.637	Snooxsog	10	61218	1	f	mutant	1.52473	1.50276	0.128338	0.0854014				0.660247	0.665484	0.0535183	0.0804202				0.44874	0.458938	0.0472892	0.10304	0.679655	20.1933				0.212644	0.214138	0.0108673	0.050749	0.322067	9.56896			0.0804202	0.473868	73.8947		73.8947	50.3593		50.3593	0.3185
9709x5394_11_1wf_C11440_30s_061218	0.637	Snooxsog	11	61218	1	f	mutant	1.28629	1.25711	0.0927791	0.0738036				0.781024	0.795477	0.0545208	0.0685386				0.557771	0.573652	0.0580264	0.101153	0.714153	21.1953				0.225338	0.221838	0.00602192	0.0271456	0.288516	8.3375			0.0685386	0.403997	77.1717		77.1717	53.5118		53.5118	0.306588
9709x5394_14_1wf_C11440_30s_061218	0.637	Snooxsog	14	61218	1	f	mutant	2.10382	2.10862	0.0504302	0.0239162				0.475595	0.474244	0.0113695	0.023974				0.251566	0.252415	0.0108597	0.043023	0.52895	15.8486				0.223796	0.221821	0.00388995	0.0175365	0.47056	13.8753			0.023974	0.889612	74.8116		74.8116	51.758		51.758	0.308156
9709x5394_15_1wf_C11440_30s_061218	0.637	Snooxsog	15	61218	1	f	mutant	1.66994	1.67604	0.0534362	0.0318823				0.599431	0.596643	0.0193628	0.0324529				0.35654	0.351963	0.0223739	0.0635689	0.594797	17.4705				0.242776	0.237147	0.0104148	0.0439173	0.40501	12.1388			0.0324529	0.680921	76.9743		76.9743	47.1251		47.1251	0.387781
9709xW1118_03_1wf_C11440_30s_041218	0.637	Snooxw1118VDRC	3	41218	1	f	mutant	3.38716	3.35226	0.267099	0.0796774				0.297623	0.298307	0.0318188	0.106665				0.121401	0.122412	0.0136786	0.111743	0.407901	12.2615				0.176233	0.168314	0.0318012	0.18894	0.592133	17.6233			0.106665	1.45166	78.9983		78.9983	47.792		47.792	0.395025
9709xW1118_04_1wf_C11440_30s_041218	0.637	Snooxw1118VDRC	4	41218	1	f	mutant	2.96658	2.97126	0.0471797	0.0158787				0.337173	0.336557	0.0053761	0.0159738				0.144029	0.14533	0.00453964	0.0312367	0.427166	12.6745				0.193137	0.191231	0.00381766	0.0199636	0.572813	16.9961			0.0159738	1.34096	77.1191		77.1191	52.9324		52.9324	0.313628
9709xW1118_05_1wf_C11440_30s_041218	0.637	Snooxw1118VDRC	5	41218	1	f	mutant	3.32457	3.2685	0.276387	0.0845609				0.304305	0.305951	0.0471043	0.15396				0.118328	0.122385	0.0156095	0.127544	0.388845	11.5961				0.186177	0.183568	0.0475924	0.259263	0.611809	18.0592			0.15396	1.5734	93.0216	85.5954	89.3085	55.4775	53.6027	54.5401	0.389306
9709xW1118_08_1wf_C11440_30s_041218	0.637	Snooxw1118VDRC	8	41218	1	f	mutant	2.63362	2.61476	0.0463127	0.017712				0.379803	0.382446	0.00665188	0.017393				0.212991	0.214149	0.00624082	0.0291423	0.560792	16.6133				0.166831	0.168277	0.00333008	0.0197892	0.439257	13.1797			0.017393	0.78328	79.1855		79.1855	53.2724		53.2724	0.327246
9709xW1118_09_1wf_C11440_30s_041218	0.637	Snooxw1118VDRC	9	41218	1	f	mutant	1.91809	1.74321	0.457305	0.262335				0.544214	0.573679	0.112359	0.195857				0.312774	0.344183	0.110121	0.319949	0.574726	17.2026				0.232022	0.229469	0.0359343	0.156597	0.426344	12.5292			0.195857	0.741821	89.1823		89.1823	52.9055		52.9055	0.406771
9709xW1118_11_1wf_C11440_30s_041218	0.637	Snooxw1118VDRC	11	41218	1	f	mutant	3.2418	3.44005	0.613406	0.178313				0.324149	0.290697	0.0946277	0.32552				0.120366	0.122383	0.0188031	0.153641	0.371329	10.9533				0.203751	0.175917	0.0826543	0.469849	0.628574	18.5414			0.32552	1.69277	85.2438		85.2438	61.894		61.894	0.273918
9709xW1118_12_1wf_C11440_30s_041218	0.637	Snooxw1118VDRC	12	41218	1	f	mutant	2.02574	2.10851	0.258719	0.122703				0.503928	0.474269	0.0904487	0.190712				0.273549	0.267712	0.0237963	0.0888877	0.542834	16.1394				0.230379	0.214165	0.0687735	0.321124	0.457166	13.5924			0.190712	0.842184	82.8026		82.8026	49.547		49.547	0.401626
9709xW1118_13_1wf_C11440_30s_041218	0.637	Snooxw1118VDRC	13	41218	1	f	mutant	3.17777	3.18862	0.282471	0.088587				0.320601	0.313615	0.0736359	0.234797				0.125425	0.130006	0.0158953	0.122266	0.391217	11.6645				0.195176	0.191219	0.0675917	0.353478	0.608783	18.1514			0.234797	1.55613	74.5399		74.5399	44.7535		44.7535	0.399603
9709xW1118_14_1wf_C11440_30s_041218	0.637	Snooxw1118VDRC	14	41218	1	f	mutant	3.22147	3.18894	0.0624895	0.0195957				0.310503	0.313589	0.00598476	0.0190847				0.120313	0.122375	0.00583623	0.0476912	0.387479	11.5501				0.190189	0.191227	0.00302946	0.0158422	0.612521	18.2582			0.0190847	1.58079
w1118x9709_01_1wf_C11440_30s_061218	0.637	Snooxw1118VDRC	1	61218	1	f	mutant	1.75987	1.72014	0.283757	0.164961				0.577958	0.588954	0.0661283	0.112281				0.377803	0.382463	0.0646075	0.168925	0.653686	19.268				0.200221	0.198883	0.00633554	0.0318556	0.346428	10.2113			0.112281	0.529961	87.9383		87.9383	58.4688		58.4688	0.335115
w1118x9709_02_1wf_C11440_30s_061218	0.637	Snooxw1118VDRC	2	61218	1	f	mutant	1.28695	1.29439	0.0764752	0.059082				0.779796	0.78018	0.0469554	0.0601853				0.581525	0.581306	0.0434296	0.0747103	0.74574	22.0979				0.19809	0.198856	0.0088275	0.0443913	0.254028	7.7255			0.0601853	0.340639	93.0369		93.0369	64.3402		64.3402	0.308445
w1118x9709_03_1wf_C11440_30s_061218	0.637	Snooxw1118VDRC	3	61218	1	f	mutant	1.32919	1.30736	0.0787754	0.0602552				0.754702	0.764898	0.0427804	0.0559295				0.568576	0.581295	0.043694	0.0751667	0.753378	22.1745				0.186126	0.183584	0.0047401	0.0258198	0.246622	7.25891			0.0559295	0.327354	89.2164		89.2164	57.9705		57.9705	0.350226
w1118x9709_04_1wf_C11440_30s_061218	0.637	Snooxw1118VDRC	4	61218	1	f	mutant	2.02819	1.86763	0.494226	0.264627				0.514496	0.535437	0.0977147	0.182495				0.322051	0.344202	0.0947714	0.275336	0.625954	18.6789				0.191895	0.191231	0.00865245	0.0452461	0.372977	10.938			0.182495	0.595853	86.7163		86.7163	54.7857		54.7857	0.368219
w1118x9709_05_1wf_C11440_30s_061218	0.637	Snooxw1118VDRC	5	61218	1	f	mutant	2.11073	1.98086	0.413634	0.208815				0.486731	0.504832	0.0734063	0.145407				0.310224	0.321265	0.0697239	0.217029	0.637362	18.9236				0.176303	0.175924	0.0125026	0.0710678	0.362219	10.7545			0.145407	0.56831	80.5144		80.5144	50.9759		50.9759	0.366872
w1118x9709_06_1wf_C11440_30s_061218	0.637	Snooxw1118VDRC	6	61218	1	f	mutant	2.00455	1.92267	0.295703	0.153798				0.506021	0.520113	0.0540331	0.103887				0.31633	0.328909	0.0609851	0.185416	0.625132	18.6635				0.189908	0.183596	0.0320082	0.17434	0.375296	11.0147			0.103887	0.600347	93.0042		93.0042	61.871		61.871	0.33475
w1118x9709_07_1wf_C11440_30s_061218	0.637	Snooxw1118VDRC	7	61218	1	f	mutant	1.91598	1.84134	0.318419	0.172928				0.534457	0.543083	0.0790909	0.145633				0.331965	0.336559	0.0789063	0.23445	0.621127	18.2581				0.202563	0.1989	0.00603158	0.0303246	0.379007	11.3435			0.145633	0.610193	74.529		74.529	48.046		48.046	0.355338
w1118x9709_08_1wf_C11440_30s_061218	0.637	Snooxw1118VDRC	8	61218	1	f	mutant	1.92159	1.79088	0.428307	0.23916				0.540019	0.558384	0.100602	0.180167				0.342119	0.367135	0.0887803	0.241819	0.633532	18.8165				0.1979	0.191227	0.0359342	0.187914	0.366468	10.8845			0.180167	0.578453	89.8983		89.8983	52.424		52.424	0.416852
w1118x9709_09_1wf_C11440_30s_061218	0.637	Snooxw1118VDRC	9	61218	1	f	mutant	2.29183	2.21583	0.345057	0.155724				0.445033	0.458941	0.0614799	0.133961				0.254013	0.2677	0.0599074	0.223785	0.570774	17.0189				0.19077	0.191226	0.00674052	0.035249	0.428665	12.7816			0.133961	0.751024	91.8363		91.8363	56.4168		56.4168	0.385681
w1118x9709_10_1wf_C11440_30s_061218	0.637	Snooxw1118VDRC	10	61218	1	f	mutant	1.99621	1.95128	0.244454	0.125279				0.509714	0.512486	0.0805821	0.157238				0.305311	0.305946	0.0804269	0.262879	0.598986	18.0134				0.204449	0.198891	0.0129389	0.0650554	0.401106	12.0625			0.157238	0.669643	85.6451		85.6451	54.3283		54.3283	0.365658
w1118x9709_11_1wf_C11440_30s_061218	0.637	Snooxw1118VDRC	11	61218	1	f	mutant	1.67121	1.63419	0.0943191	0.0577161				0.5999	0.611923	0.0318797	0.0520976				0.409299	0.420696	0.0322126	0.0765697	0.682279	20.0557				0.190613	0.191226	0.00459333	0.0240204	0.317742	9.53066			0.0520976	0.465706	81.546		81.546	53.5421		53.5421	0.343412
w1118x9709_12_1wf_C11440_30s_061218	0.637	Snooxw1118VDRC	12	61218	1	f	mutant	1.69172	1.55645	0.433459	0.278493				0.616477	0.642489	0.109869	0.171006				0.416546	0.443615	0.107333	0.24195	0.675688	19.9942				0.200155	0.198885	0.00643798	0.0323704	0.324676	9.60744			0.171006	0.480511	78.154		78.154	47.2455		47.2455	0.395482
w1118x9709_13_1wf_C11440_30s_061218	0.637	Snooxw1118VDRC	13	61218	1	f	mutant	2.45273	2.46648	0.0573464	0.0232503				0.407911	0.405436	0.00929256	0.0229199				0.191121	0.191227	0.00960112	0.050208	0.468535	13.9518				0.216791	0.21419	0.00572286	0.0267187	0.531465	15.8257			0.0229199	1.13431	73.903		73.903	53.5421		53.5421	0.275508
w1118x9709_14_1wf_C11440_30s_061218	0.637	Snooxw1118VDRC	14	61218	1	f	mutant	1.06119	1.00566	0.148333	0.147497				0.955877	0.994368	0.111978	0.112612				0.74269	0.780182	0.111805	0.143306	0.776972	23.0234				0.213188	0.21417	0.00549802	0.0256712	0.223028	6.60882			0.112612	0.287048	96.1617		96.1617	66.9123		66.9123	0.304169
w1118x9709_15_1wf_C11440_30s_061218	0.637	Snooxw1118VDRC	15	61218	1	f	mutant	2.06457	2.04285	0.0546157	0.0267351				0.484645	0.489513	0.0126474	0.0258368				0.306333	0.30596	0.0163015	0.05328	0.632077	18.6863				0.178312	0.168302	0.0175632	0.104356	0.367923	10.877			0.0258368	0.582085	81.2593		81.2593	54.2797		54.2797	0.332019
5394xw1118_01_1wf_C11440_30s_041218	0.637	sogxw1118VDRC	1	41218	1	f	mutant	3.17615	3.26842	0.436395	0.133519				0.323554	0.30596	0.0679149	0.221973				0.162728	0.160655	0.0258188	0.16071	0.502939	14.8082				0.162566	0.145333	0.052966	0.364445	0.502438	14.7935			0.221973	0.999005	84.2238		84.2238	59.6472		59.6472	0.291802
5394xw1118_02_1wf_C11440_30s_041218	0.637	sogxw1118VDRC	2	41218	1	f	mutant	3.31788	3.35193	0.0728962	0.0217476				0.301512	0.298337	0.00667847	0.0223857				0.128624	0.130007	0.00794978	0.061149	0.426598	12.6052				0.172888	0.175908	0.00571831	0.0325074	0.573402	16.943			0.0223857	1.34413	99.372		99.372	75.1687		75.1687	0.243563
5394xw1118_03_1wf_C11440_30s_041218	0.637	sogxw1118VDRC	3	41218	1	f	mutant	2.61773	2.61467	0.254934	0.0975014				0.385471	0.38246	0.0360057	0.0941424				0.21338	0.214201	0.0348472	0.162684	0.553555	16.4302				0.171158	0.168306	0.00874961	0.0519862	0.444023	13.1792			0.0941424	0.80213	86.054	79.4209	82.7374	55.5506	55.2173	55.384	0.330606
5394xw1118_04_1wf_C11440_30s_041218	0.637	sogxw1118VDRC	4	41218	1	f	mutant	2.80245	2.78156	0.222357	0.0799399				0.358945	0.359543	0.0268954	0.0748046				0.220992	0.221823	0.0275741	0.124307	0.615671	18.3423				0.138243	0.137681	0.00726562	0.0527714	0.385136	11.3359			0.0748046	0.625555	98.3046		98.3046	65.6883		65.6883	0.331789
5394xw1118_05_1wf_C11440_30s_041218	0.637	sogxw1118VDRC	5	41218	1	f	mutant	2.74008	2.72378	0.0700787	0.0257285				0.36517	0.367137	0.00894673	0.0243689				0.185752	0.183588	0.00801365	0.0436502	0.508672	15.0459				0.179376	0.175957	0.00551727	0.0313558	0.491212	14.7088			0.0243689	0.965675	74.5916		74.5916	44.3253		44.3253	0.40576
5394xw1118_06_1wf_C11440_30s_041218	0.637	sogxw1118VDRC	6	41218	1	f	mutant	2.12661	2.07532	0.125904	0.0606676				0.471525	0.481855	0.0260936	0.0541522				0.271238	0.282993	0.0281055	0.0993154	0.575235	17.088				0.200452	0.198879	0.00553543	0.0278331	0.425114	12.6285			0.0541522	0.739028	85.3794		85.3794	60.1147		60.1147	0.295911
5394xw1118_07_1wf_C11440_30s_041218	0.637	sogxw1118VDRC	7	41218	1	f	mutant	2.0642	2.07502	0.0545493	0.0262885				0.484773	0.481922	0.0127993	0.0265588				0.297939	0.298315	0.0152647	0.0511699	0.614595	18.1743				0.186834	0.183579	0.00719418	0.0391885	0.385405	11.3969			0.0265588	0.627087	84.7234		84.7234	60.9959		60.9959	0.280059
5394xw1118_08_1wf_C11440_30s_041218	0.637	sogxw1118VDRC	8	41218	1	f	mutant	2.8402	2.84208	0.124671	0.0438661				0.352777	0.351855	0.0157544	0.0447752				0.178661	0.175928	0.0158359	0.0900135	0.506443	15.0076				0.174104	0.175924	0.00408846	0.0232399	0.493525	14.6248			0.0447752	0.974493	68.9021		68.9021	47.7792		47.7792	0.306563
5394xw1118_09_1wf_C11440_30s_041218	0.637	sogxw1118VDRC	9	41218	1	f	mutant	2.01981	1.9225	0.419832	0.218378				0.515438	0.520156	0.105238	0.202319				0.308647	0.31364	0.094878	0.302506	0.598805	17.5929				0.206654	0.198876	0.0421232	0.211806	0.400929	11.9859			0.202319	0.669549	84.8383		84.8383	54.6819		54.6819	0.355457
5394xw1118_10_1wf_C11440_30s_041218	0.637	sogxw1118VDRC	10	41218	1	f	mutant	1.68406	1.6761	0.297249	0.177346				0.613713	0.596624	0.11693	0.195986				0.402847	0.390098	0.11344	0.290799	0.65641	19.3367				0.208597	0.206524	0.0112048	0.0542542	0.339894	10.0127			0.195986	0.517807	88.4949		88.4949	60.9959		60.9959	0.310741
5394xw1118_11_1wf_C11440_30s_041218	0.637	sogxw1118VDRC	11	41218	1	f	mutant	2.78405	2.7817	0.112509	0.0404461				0.359781	0.359492	0.0147138	0.0409295				0.208645	0.214167	0.0208384	0.0972997	0.579924	17.3176				0.151135	0.145333	0.0157318	0.108247	0.420076	12.5442			0.0409295	0.724364	81.546		81.546	61.364		61.364	0.247492
5394xw1118_12_1wf_C11440_30s_041218	0.637	sogxw1118VDRC	12	41218	1	f	mutant	1.7444	1.72022	0.184038	0.106985				0.579676	0.581323	0.0616691	0.106084				0.421597	0.420696	0.0615324	0.146263	0.727298	21.5015				0.157981	0.16062	0.00497039	0.0309451	0.272533	8.215			0.106084	0.374719	76.705		76.705	55.7147		55.7147	0.273649
5394xw1118_13_1wf_C11440_30s_041218	0.637	sogxw1118VDRC	13	41218	1	f	mutant	2.04622	2.01132	0.191642	0.0952814				0.491959	0.497186	0.0362149	0.0728398				0.283401	0.298288	0.0436956	0.146488	0.576066	17.0041				0.2084	0.198875	0.0316119	0.158953	0.423611	12.7124			0.0728398	0.735352	84.1057		84.1057	56.0705		56.0705	0.333333
5394xw1118_14_1wf_C11440_30s_041218	0.637	sogxw1118VDRC	14	41218	1	f	mutant	1.60605	1.53807	0.32627	0.21213				0.643182	0.650201	0.106107	0.163191				0.442481	0.458937	0.107458	0.234147	0.687955	20.3541				0.200702	0.198874	0.0166129	0.0835351	0.312045	9.23228			0.163191	0.453583	94.3384		94.3384	62.4292		62.4292	0.338241
5394xw1118_15_1wf_C11440_30s_041218	0.637	sogxw1118VDRC	15	41218	1	f	mutant	2.30644	2.2542	0.287678	0.127619				0.438919	0.443619	0.0457787	0.103194				0.249832	0.252416	0.0482053	0.190976	0.569198	16.9886				0.189087	0.191222	0.00736061	0.0384925	0.430802	12.8579			0.103194	0.756858
w1118x5394_01_1wf_C11440_30s_061218	0.637	sogxw1118VDRC	1	61218	1	f	mutant	1.9282	1.95119	0.18766	0.0961769				0.524638	0.520105	0.0655059	0.125947				0.314427	0.305958	0.0649041	0.212134	0.599322	17.6079				0.210281	0.206556	0.00638654	0.0309191	0.400811	11.986			0.125947	0.668774	86.5969		86.5969	53.8142		53.8142	0.378566
w1118x5394_02_1wf_C11440_30s_061218	0.637	sogxw1118VDRC	2	61218	1	f	mutant	2.04382	2.01151	0.114268	0.056807				0.490682	0.497156	0.0270236	0.0543563				0.29742	0.298338	0.0242533	0.0812947	0.606137	17.8452				0.193229	0.191221	0.018325	0.0958315	0.393796	11.787			0.0543563	0.649683	84.2383		84.2383	58.8251		58.8251	0.301682
w1118x5394_04_1wf_C11440_30s_061218	0.637	sogxw1118VDRC	4	61218	1	f	mutant	2.89201	3.11279	0.633759	0.203598				0.368681	0.321257	0.122063	0.379955				0.14571	0.130003	0.0505717	0.389004	0.39522	11.6568				0.222579	0.191251	0.0738597	0.386193	0.603717	18.0289			0.379955	1.52755	78.9983		78.9983	52.234		52.234	0.338796
w1118x5394_05_1wf_C11440_30s_061218	0.637	sogxw1118VDRC	5	61218	1	f	mutant	3.03801	3.04037	0.121014	0.0398023				0.329671	0.328907	0.0128238	0.038989				0.154338	0.160616	0.0194146	0.120876	0.468158	13.8904				0.175255	0.168306	0.0161262	0.0958148	0.531606	15.9482			0.038989	1.13553	87.4571		87.4571	59.2718		59.2718	0.322276
w1118x5394_06_1wf_C11440_30s_061218	0.637	sogxw1118VDRC	6	61218	1	f	mutant	1.80654	1.81586	0.0794878	0.0437742				0.554624	0.550704	0.0250658	0.0455158				0.344061	0.336584	0.0242024	0.071906	0.62035	18.5793				0.211576	0.214161	0.00903179	0.0421729	0.381477	11.2135			0.0455158	0.614938	72.618		72.618	53.6027		53.6027	0.261854
w1118x5394_07_1wf_C11440_30s_061218	0.637	sogxw1118VDRC	7	61218	1	f	mutant	3.43172	3.44039	0.0837901	0.0243548				0.291561	0.290665	0.00677177	0.0232975				0.114133	0.114735	0.00742077	0.0646777	0.391455	11.6416				0.177428	0.175929	0.00386056	0.0219438	0.608545	18.0977			0.0232975	1.55457	68.5182		68.5182	42.8498		42.8498	0.374622
w1118x5394_08_1wf_C11440_30s_061218	0.637	sogxw1118VDRC	8	61218	1	f	mutant	2.30351	2.29375	0.0800867	0.0349151				0.434643	0.435989	0.0152427	0.0349611				0.255521	0.252451	0.0137767	0.0545718	0.587887	17.6309				0.178964	0.175948	0.00592819	0.0336928	0.411749	12.1696			0.0349611	0.700389	79.4107		79.4107	57.0497		57.0497	0.281586
w1118x5394_09_1wf_C11440_30s_061218	0.637	sogxw1118VDRC	9	61218	1	f	mutant	3.15869	3.18842	0.178552	0.0560002				0.31805	0.313635	0.0274055	0.0873802				0.142563	0.145321	0.0108713	0.0748089	0.448242	13.401				0.175277	0.175901	0.0199297	0.1133	0.551097	16.476			0.0873802	1.22946	76.0702		76.0702	50.3593		50.3593	0.337989
w1118x5394_10_1wf_C11440_30s_061218	0.637	sogxw1118VDRC	10	61218	1	f	mutant	2.22499	2.216	0.0508732	0.0229572				0.449668	0.451267	0.0102257	0.0226599				0.252762	0.252417	0.00983017	0.0389442	0.562107	16.6823				0.196936	0.19887	0.00447917	0.0225231	0.437958	13.1947			0.0226599	0.779137	80.7057		80.7057	58.5936		58.5936	0.273984
w1118x5394_12_1wf_C11440_30s_061218	0.637	sogxw1118VDRC	12	61218	1	f	mutant	2.47483	2.46665	0.122185	0.0495348				0.404979	0.405408	0.0185679	0.0458005				0.20921	0.214142	0.0190675	0.0890414	0.516594	15.4815				0.194894	0.191251	0.00625091	0.0326843	0.481244	14.2272			0.0458005	0.931571	78.154		78.154	58.6178		58.6178	0.24997
w1118x5394_13_1wf_C11440_30s_061218	0.637	sogxw1118VDRC	13	61218	1	f	mutant	1.41988	1.4058	0.0824788	0.0586703				0.706439	0.711359	0.038117	0.0535834				0.46823	0.474236	0.0417463	0.0880285	0.662803	19.6657				0.238209	0.237118	0.00914397	0.038563	0.337197	10.0048			0.0535834	0.508744	85.6996		85.6996	64.5856		64.5856	0.246372
w1118x5394_14_1wf_C11440_30s_061218	0.637	sogxw1118VDRC	14	61218	1	f	mutant	1.27752	1.26929	0.0665666	0.0524438				0.784745	0.787839	0.0385332	0.0489099				0.570161	0.573673	0.0387803	0.0676	0.726556	21.096				0.214371	0.214173	0.00540731	0.0252474	0.273173	8.1461			0.0489099	0.375983	88.2883		88.2883	59.0214		59.0214	0.331492
w1118x5394_15_1wf_C11440_30s_061218	0.637	sogxw1118VDRC	15	61218	1	f	mutant	2.64275	2.61472	0.128808	0.0492626				0.379214	0.382451	0.017557	0.0459064				0.195243	0.198872	0.0174286	0.0876373	0.514863	15.229				0.183869	0.183576	0.00478845	0.0260844	0.484869	14.5256			0.0459064	0.941744	89.8735		89.8735	57.6159		57.6159	0.358922
w1118_01_1wf_C11440_30s_041218	0.637	w1118VDRC	1	41218	1	f	control	1.11403	1.05436	0.182051	0.172665				0.914538	0.956102	0.118983	0.124445				0.653032	0.680758	0.117084	0.171991	0.714057	20.897				0.261693	0.260098	0.00950244	0.0365341	0.286148	8.63588			0.124445	0.400736	110.319		110.319	74.529		74.529	0.324421
w1118_01_1wf_C11440_30s_061218	0.637	w1118VDRC	1	61218	1	f	control	1.94698	1.69785	0.72918	0.429472				0.580253	0.59664	0.203429	0.340959				0.350354	0.359459	0.190528	0.530041	0.603796	17.8681				0.230819	0.221806	0.0838512	0.378039	0.397791	11.7718			0.340959	0.658817	80.3353		80.3353	48.9496		48.9496	0.390683
w1118_02_1wf_C11440_30s_041218	0.637	w1118VDRC	2	41218	1	f	control	1.93618	1.92268	0.0928073	0.0482697				0.517584	0.520106	0.0234744	0.0451339				0.276816	0.275394	0.024208	0.087903	0.534823	16.0553				0.241146	0.24473	0.00543044	0.0221895	0.465906	13.7453			0.0451339	0.871141	82.094		82.094	64.138		64.138	0.218724
w1118_02_1wf_C11440_30s_061218	0.637	w1118VDRC	2	61218	1	f	control	1.27017	1.46894	0.428374	0.291621				0.914918	0.680762	0.531738	0.781092				0.677553	0.443652	0.533451	1.20241	0.740561	21.0041				0.237365	0.237118	0.00900231	0.0379656	0.259439	7.35832			0.781092	0.350327	82.094		82.094	55.609		55.609	0.322617
w1118_03_1wf_C11440_30s_041218	0.637	w1118VDRC	3	41218	1	f	control	1.98647	1.9226	0.407082	0.211736				0.523685	0.520131	0.105492	0.202818				0.280995	0.275364	0.0909749	0.330381	0.536572	16.0167				0.242589	0.237118	0.0329661	0.139029	0.463235	13.585			0.202818	0.863322	87.2899		87.2899	60.5988		60.5988	0.305776
w1118_03_1wf_C11440_30s_061218	0.637	w1118VDRC	3	61218	1	f	control	2.4586	2.51415	0.736999	0.29314				0.468289	0.397749	0.283648	0.713134				0.219791	0.183579	0.132039	0.719246	0.46935	14.0666				0.247801	0.206503	0.270548	1.31014	0.529162	15.6114			0.713134	1.12744	96.8994		96.8994	65.1735		65.1735	0.32741
w1118_04_1wf_C11440_30s_041218	0.637	w1118VDRC	4	41218	1	f	control	1.73897	1.74313	0.0653023	0.0374626				0.575776	0.573679	0.0195141	0.0340156				0.300711	0.298321	0.0208241	0.0698044	0.522271	15.3363				0.275218	0.275381	0.00918456	0.0333522	0.477996	14.3114			0.0340156	0.915226	80.2847		80.2847	47.8132		47.8132	0.404455
w1118_04_1wf_C11440_30s_061218	0.637	w1118VDRC	4	61218	1	f	control	1.10995	1.10796	0.0637477	0.0575362				0.904015	0.902565	0.053786	0.0595923				0.652075	0.657805	0.0512432	0.0779003	0.72131	20.8664				0.251955	0.252407	0.0104801	0.0415207	0.278706	8.31451			0.0595923	0.386389	90.3238		90.3238	58.7734		58.7734	0.349303
w1118_05_1wf_C11440_30s_041218	0.637	w1118VDRC	5	41218	1	f	control	2.39437	2.42086	0.0455621	0.0188206				0.417746	0.420669	0.00713176	0.0169534				0.192412	0.191228	0.00635592	0.0332374	0.460595	13.6613				0.225375	0.221846	0.00519911	0.0234357	0.539503	16.0017			0.0169534	1.17132	101.733	103.243	102.488	67.756	66.2511	67.0035	0.34623
w1118_05_1wf_C11440_30s_061218	0.637	w1118VDRC	5	61218	1	f	control	1.59964	1.61405	0.193706	0.120012				0.642017	0.61956	0.144859	0.233809				0.411384	0.390098	0.143502	0.367861	0.640768	18.9237				0.230633	0.229472	0.00464957	0.020262	0.359232	10.6091			0.233809	0.560627	80.2645		80.2645	58.1906		58.1906	0.275015
w1118_06_1wf_C11440_30s_041218	0.637	w1118VDRC	6	41218	1	f	control	1.48764	1.40581	0.421692	0.299964				0.721807	0.711334	0.193773	0.272408				0.425363	0.443619	0.132507	0.298696	0.589303	17.4399				0.295578	0.25239	0.13416	0.531558	0.409497	12.4143			0.272408	0.694885	87.0292		87.0292	57.8374		57.8374	0.335426
w1118_06_1wf_C11440_30s_061218	0.637	w1118VDRC	6	61218	1	f	control	1.18664	1.09861	0.422632	0.384696				0.906167	0.917871	0.207218	0.22576				0.651358	0.673064	0.185085	0.274988	0.718805	20.8435				0.254737	0.244783	0.0423783	0.173126	0.281114	8.40631			0.22576	0.391085	70.1742		70.1742	39.5402		39.5402	0.436542
w1118_07_1wf_C11440_30s_061218	0.637	w1118VDRC	7	61218	1	f	control	1.82753	1.86765	0.357071	0.191187				0.580874	0.535431	0.190527	0.355838				0.274765	0.282995	0.0629194	0.222334	0.47302	14.013				0.306109	0.244789	0.207198	0.846436	0.52698	15.6115			0.355838	1.11407	103.833		103.833	71.5258		71.5258	0.311146
w1118_08_1wf_C11440_30s_041218	0.637	w1118VDRC	8	41218	1	f	control	1.2002	1.08051	0.413965	0.383119				0.885432	0.925486	0.181383	0.195986				0.620499	0.642517	0.164258	0.255648	0.700787	20.4765				0.264565	0.252428	0.0381912	0.151296	0.298798	8.99521			0.195986	0.426375	91.3468		91.3468	61.894		61.894	0.322428
w1118_08_1wf_C11440_30s_061218	0.637	w1118VDRC	8	61218	1	f	control	1.59456	1.48566	0.467435	0.314632				0.666529	0.673103	0.145779	0.216578				0.405397	0.413048	0.14513	0.351364	0.608221	17.8375				0.264412	0.252434	0.0577327	0.228704	0.3967	11.6341			0.216578	0.65223	97.461		97.461	62.439		62.439	0.359344
w1118_09_1wf_C11440_30s_061218	0.637	w1118VDRC	9	61218	1	f	control	1.18033	1.19941	0.0543976	0.0453537				0.848814	0.841372	0.0377299	0.0448434				0.598811	0.588989	0.0384139	0.06522	0.705468	20.9584				0.250883	0.252406	0.00428206	0.016965	0.295569	8.7809			0.0448434	0.418968	100.648		100.648	70.7328		70.7328	0.297226
w1118_10_1wf_C11440_30s_041218	0.637	w1118VDRC	10	41218	1	f	control	1.23955	1.06291	0.461704	0.434376				0.875466	0.94081	0.216389	0.230003				0.636221	0.696064	0.213256	0.306374	0.726723	21.6315				0.243608	0.244767	0.014647	0.0598407	0.278261	8.03906			0.230003	0.382898	105.744		105.744	72.119		72.119	0.317985
w1118_10_1wf_C11440_30s_061218	0.637	w1118VDRC	10	61218	1	f	control	1.31208	1.1778	0.56718	0.481559				0.902342	0.849053	0.380699	0.44838				0.54053	0.550749	0.331765	0.60239	0.59903	17.8375				0.365717	0.305933	0.157619	0.515208	0.405297	11.7029			0.44838	0.676588	89.9975		89.9975	56.0343		56.0343	0.37738
w1118_11_1wf_C11440_30s_041218	0.637	w1118VDRC	11	41218	1	f	control	2.94293	2.9052	0.167275	0.0575779				0.340777	0.344211	0.0180633	0.0524776				0.159854	0.168276	0.0228468	0.13577	0.469086	14.0671				0.180405	0.183561	0.00997671	0.0543509	0.529393	15.6952			0.0524776	1.12856	101.315		101.315	64.0969		64.0969	0.367351
w1118_11_1wf_C11440_30s_061218	0.637	w1118VDRC	11	61218	1	f	control	0.937693	0.933839	0.497871	0.533145				1.58122	1.22384	1.1989	0.979619				0.975441	0.474243	1.16161	2.44941	0.616892	18.5334				0.578916	0.550746	0.244561	0.444055	0.366121	10.9994			0.979619	0.593492	85.5503		85.5503	49.6901		49.6901	0.419171
w1118_12_1wf_C11440_30s_041218	0.637	w1118VDRC	12	41218	1	f	control	1.75312	1.74315	0.0634827	0.0364185				0.571128	0.573675	0.0202373	0.0352766				0.325381	0.328903	0.0195553	0.0594561	0.569716	16.9198				0.246236	0.244774	0.00396679	0.0162059	0.431141	12.8043			0.0352766	0.756764
w1118_12_1wf_C11440_30s_061218	0.637	w1118VDRC	12	61218	1	f	control	1.25285	0.695402	1.248	1.79465				1.48471	1.43802	0.965572	0.671461				1.11675	1.15499	0.861728	0.746094	0.752168	21.2183				0.36333	0.275343	0.261087	0.948223	0.244714	7.26659			0.671461	0.325345	88.8723		88.8723	57.6828		57.6828	0.350948
w1118_13_1wf_C11440_30s_041218	0.637	w1118VDRC	13	41218	1	f	control	1.7192	1.7203	0.0532991	0.0309825				0.582226	0.581295	0.0181156	0.0311642				0.345555	0.344204	0.0180796	0.0525258	0.593507	17.6233				0.236671	0.23712	0.00321199	0.0135458	0.406493	12.0702			0.0311642	0.684901	93.4286	92.3738	92.9012	64.7895	65.9195	65.3545	0.296516
w1118_13_1wf_C11440_30s_061218	0.637	w1118VDRC	13	61218	1	f	control	1.35728	1.34778	0.0540443	0.0400988				0.737834	0.741961	0.0275813	0.0371736				0.472135	0.481867	0.0288449	0.0598607	0.639894	18.8854				0.266184	0.267703	0.0051276	0.0191541	0.360765	10.6474			0.0371736	0.563788	81.9554		81.9554	57.4573		57.4573	0.298921
w1118_14_1wf_C11440_30s_041218	0.637	w1118VDRC	14	41218	1	f	control	2.04437	2.01131	0.285935	0.142164				0.498206	0.497192	0.0708086	0.142417				0.243236	0.237118	0.0574619	0.242335	0.488225	14.5942				0.25497	0.260062	0.037182	0.142974	0.511775	15.2982			0.142417	1.04824	91.0932		91.0932	55.4519		55.4519	0.391262
w1118_14_1wf_C11440_30s_061218	0.637	w1118VDRC	14	61218	1	f	control	1.5217	1.52013	0.064534	0.042453				0.658335	0.66544	0.0286786	0.0430972				0.397749	0.39776	0.0248214	0.062403	0.604174	17.8987				0.260235	0.260069	0.00845405	0.032507	0.395293	11.7106			0.0430972	0.654271	97.4631		97.4631	65.0239		65.0239	0.332835
w1118_15_1wf_C11440_30s_061218	0.637	w1118VDRC	15	61218	1	f	control	1.44482	1.37613	0.316654	0.230105				0.721058	0.726678	0.142402	0.195963				0.491906	0.512497	0.145969	0.28482	0.6822	20.66				0.224005	0.22179	0.0168617	0.0760253	0.310661	9.40821			0.195963	0.455382	92.4967		92.4967	61.1553		61.1553	0.338838
[truncated: 36 more columns]

## Sheet: Babo_dpp
flyID	EDD	ESD	FS	HR	HP_median	DI_median	relaxtime	SI_median	peaked_median	min.velocity	max.velocity	MAD_SI	MAD_HP	MAD_DI	tt10p_median	tt25p_median	tt50p_median	tt75p_median	tt90p_median	tt90r_median	tt75r_median	tt50r_median	tt25r_median	tt10r_median	deltaSI_median	deltaSIplus_median	AI	MAD_tt10r	SV	CO	anterograde_percent	anterograde_speed	retrograde_speed	CODE	CODE_long	type	cross		cxd_file	cxd_recordingday	cxd_week_year	human_gene	fly_gene	Age	Sex	time_interval	resolution	filename	cxd_date
babo32_01_1wf	74.75	44.2	0.401297	6.79785	0.139934	0.0391815	0.0942339	0.0988866	0.0457	-1058.89	1145.98	0.0110649	0.0221297	0.0248959	0.00655	0.0112	0.0183	0.02675	0.03395	0.0571	0.063	0.0712	0.0819	0.09235	0.00186578	0.00186578	0.170132	0.007413	2907.17	19762.5	0.324324	45322.8	-35153.4	babo32	babo321f	experiment	babo(32)	tdtk x 60100	babo32_01_1wf_orca2_5s_070320,cxd	NA	NA	NA	babo	1	f	NA	0.654306	NA	70320
babo32_02_1wf	77.675	50.05	0.367825	8.36299	0.112667	0.0197168	0.0739452	0.0910728	0.0406	-1110.3	1349.62	0.0139201	0.011136	0.0153121	0.0088	0.0137	0.0205	0.0274	0.0323	0.0497	0.0548	0.0616	0.0714	0.0804	0	0	0.148775	0.00845082	2892.86	23964.5	0.543478	34476.2	-44821.7	babo32	babo321f	experiment	babo(32)	tdtk x 60100	babo32_02_1wf_orca2_5s_070320,cxd	NA	NA	NA	babo	1	f	NA	0.654306	NA	70320
babo32_03_1wf	82.55	53.3	0.354331	8.71886	0.108912	0.0131445	0.0691118	0.0901339	0.0398	-1356.35	1349.28	0.011136	0.011136	0.0139201	0.0088	0.0132	0.0198	0.0262	0.031	0.0494	0.0538	0.0594	0.0684	0.0799	-0.00375558	-0.00375558	0.150363	0.00578214	3120.87	27210.4	0.54	67601.9	-31669.8	babo32	babo321f	experiment	babo(32)	tdtk x 60100	babo32_03_1wf_orca2_5s_070320,cxd	NA	NA	NA	babo	1	f	NA	0.654306	NA	70320
babo32_04_1wf	81.25	53.3	0.356028	8.55615	0.112487	0.026247	0.0744873	0.0862403	0.038	-1372.67	1319.6	0.0111182	0.0111182	0.0222365	0.0066	0.0112	0.0178	0.0238	0.0294	0.0458	0.0504	0.0563	0.0678	0.0784	0	0	0.122547	0.00681996	2953.63	25271.7	0.361702	22416.6	-36786.5	babo32	babo321f	experiment	babo(32)	tdtk x 60100	babo32_04_1wf_orca2_5s_070320,cxd	NA	NA	NA	babo	1	f	NA	0.654306	NA	70320
babo32_05_1wf	79.95	47.125	0.399534	7.86106	0.124288	0.023761	0.0788883	0.095044	0.0454	-1377.01	1331.53	0.00812955	0.0108394	0.0162591	0.0077	0.0133	0.0208	0.0283	0.0341	0.0549	0.0597	0.0665	0.07465	0.08415	0.000913885	0	0.151145	0.0051891	3344.02	26287.6	0.179487	45205	-33536	babo32	babo321f	experiment	babo(32)	tdtk x 60100	babo32_05_1wf_orca2_5s_070320,cxd	NA	NA	NA	babo	1	f	NA	0.654306	NA	70320
babo32_06_1wf	77.025	51.025	0.336757	8.7344	0.108738	0.0149983	0.0694378	0.0918647	0.0393	-1038.35	1185.17	0.0111182	0.00833869	0.012508	0.0071	0.0119	0.0179	0.024	0.029	0.0495	0.0554	0.0628	0.0724	0.081	-0.00187479	-0.00187479	0.131191	0.00956277	2621.46	22896.9	0.5	27105.8	-49901.7	babo32	babo321f	experiment	babo(32)	tdtk x 60100	babo32_06_1wf_orca2_5s_070320,cxd	NA	NA	NA	babo	1	f	NA	0.654306	NA	70320
babo32_07_1wf	70.525	43.225	0.370619	8.18505	0.116299	0.0300126	0.076299	0.0881621	0.0407	-1067.81	1086.64	0.00973366	0.00834314	0.0139052	0.0079	0.0132	0.01965	0.02685	0.03225	0.0486	0.0531	0.06	0.06975	0.0804	-5.55112e-16	-3.05311e-16	0.122771	0.00600453	2372.76	19421.1	0.431818	28705.4	-61897.5	babo32	babo321f	experiment	babo(32)	tdtk x 60100	babo32_07_1wf_orca2_5s_070320,cxd	NA	NA	NA	babo	1	f	NA	0.654306	NA	70320
babo32_08_1wf	93.275	67.6	0.272224	8.55615	0.112427	0.0224855	0.0721773	0.0871312	0.04025	-1136.43	1224.96	0.0069452	0.0111123	0.0111123	0.00895	0.01455	0.0209	0.02675	0.03175	0.0497	0.055	0.0618	0.0694	0.078	0	0	0.137194	0.00400302	3244.14	27757.4	0.348837	49569.2	-30361	babo32	babo321f	experiment	babo(32)	tdtk x 60100	babo32_08_1wf_orca2_5s_070320,cxd	NA	NA	NA	babo	1	f	NA	0.654306	NA	70320
babo32_09_1wf	75.075	44.525	0.402052	7.84314	0.119987	0.0318714	0.0805865	0.0899899	0.0394	-1308.03	1501.08	0.0166774	0.0111182	0.0250161	0.00685	0.0114	0.01765	0.02375	0.0289	0.0495	0.0545	0.0607	0.0686	0.0774	-0.00187479	-0.000937395	0.157719	0.00830256	2869.67	22507.2	0.142857	41507.3	-32575.3	babo32	babo321f	experiment	babo(32)	tdtk x 60100	babo32_09_1wf_orca2_5s_070320,cxd	NA	NA	NA	babo	1	f	NA	0.654306	NA	70320
babo32_10_1wf	87.425	54.925	0.370806	8.46702	0.116237	0.026247	0.0733369	0.0881151	0.0429	-1557.26	1383.75	0.0111182	0.0138978	0.012508	0.00975	0.01505	0.02155	0.0289	0.03475	0.0502	0.0542	0.06015	0.0672	0.0764	-2.63678e-16	-2.55351e-15	0.133882	0.00659757	3633.55	30771.8	0.229167	47149.2	-65795.7	babo32	babo321f	experiment	babo(32)	tdtk x 60100	babo32_10_1wf_orca2_5s_070320,cxd	NA	NA	NA	babo	1	f	NA	0.654306	NA	70320
babo32_11_1wf	82.55	50.05	0.387264	8.64528	0.11149	0.0187379	0.0667904	0.0936894	0.0447	-1431.96	1306.15	0.0111123	0.0069452	0.0166685	0.0092	0.0147	0.0216	0.0289	0.0352	0.05285	0.057	0.063	0.0711	0.0792	7.49401e-16	1.02696e-15	0.158954	0.00607866	3381.69	29222	0.439024	14143.9	-33644.1	babo32	babo321f	experiment	babo(32)	tdtk x 60100	babo32_11_1wf_orca2_5s_070320,cxd	NA	NA	NA	babo	1	f	NA	0.654306	NA	70320
babo32_12_1wf	92.95	65	0.359756	8.02139	0.123736	0.026247	0.0803361	0.0899899	0.0434	-1572	1610.26	0.0111182	0.0166774	0.0250161	0.0092	0.0134	0.0202	0.0286	0.0342	0.053	0.0576	0.0632	0.0712	0.0766	-4.88498e-15	-9.76996e-15	0.160856	0.0100817	4037.72	31668.4	0.309524	66412.1	-32638.7	babo32	babo321f	experiment	babo(32)	tdtk x 60100	babo32_12_1wf_orca2_5s_070320,cxd	NA	NA	NA	babo	1	f	NA	0.654306	NA	70320
babo32_13_1wf	72.15	44.2	0.359223	7.48663	0.131235	0.0299966	0.0938352	0.097489	0.0374	-883.274	1221.72	0.0166774	0.0111182	0.0277956	0.0062	0.0104	0.0154	0.0209	0.0266	0.0484	0.0561	0.0631	0.0752	0.0907	1.02141e-14	1.04361e-14	0.133394	0.00770952	2547.13	19069.4	0.372093	22144.8	-52723.4	babo32	babo321f	experiment	babo(32)	tdtk x 60100	babo32_13_1wf_orca2_5s_070320,cxd	NA	NA	NA	babo	1	f	NA	0.654306	NA	70320
babo32_14_1wf	66.95	44.85	0.344262	7.84314	0.123736	0.026247	0.0787361	0.0937395	0.0428	-827.366	1040.12	0.0111182	0.0111182	0.0222365	0.0064	0.0114	0.0174	0.0246	0.031	0.0522	0.0582	0.0682	0.0747	0.085	0	0	0.159983	0.00934038	1940.55	15220	0.522727	26021	-42857.9	babo32	babo321f	experiment	babo(32)	tdtk x 60100	babo32_14_1wf_orca2_5s_070320,cxd	NA	NA	NA	babo	1	f	NA	0.654306	NA	70320
babo32_15_1wf	75.075	47.775	0.366637	8.3779	0.118049	0.0187379	0.0765487	0.0918156	0.0415	-1095.35	1217.73	0.0138904	0.0111123	0.0166685	0.0076	0.012	0.01855	0.02565	0.0316	0.05065	0.0553	0.06275	0.0729	0.0807	4.44089e-15	6.13398e-15	0.17233	0.0123056	2540.99	21741.1	0.422222	19149.7	-44364.2	babo32	babo321f	experiment	babo(32)	tdtk x 60100	babo32_15_1wf_orca2_5s_070320,cxd	NA	NA	NA	babo	1	f	NA	0.654306	NA	70320
babo32_16_1wf	86.45	59.15	0.310342	7.48663	0.127486	0.0299966	0.0838857	0.097489	0.0436	-1069.01	1188.7	0.00555913	0.0166774	0.0166774	0.007	0.012	0.0186	0.0256	0.0311	0.0579	0.0652	0.0728	0.0802	0.0884	0	0	0.211541	0.00266868	3121.86	23372.2	0.243902	35625.9	-41500.2	babo32	babo321f	experiment	babo(32)	tdtk x 60100	babo32_16_1wf_orca2_5s_070320,cxd	NA	NA	NA	babo	1	f	NA	0.654306	NA	70320
babo32_17_1wf	65.325	41.6	0.345788	8.71886	0.112547	0.0281368	0.0716474	0.0844105	0.0409	-1077.02	1066.56	0.0139052	0.0111242	0.0194673	0.0064	0.0111	0.0176	0.0252	0.0321	0.0484	0.053	0.0599	0.0695	0.07555	-2.22045e-16	-1.11022e-16	0.153981	0.0111936	1996.13	17209.4	0.818182	18185.1	-38504.6	babo32	babo321f	experiment	babo(32)	tdtk x 60100	babo32_17_1wf_orca2_5s_070320,cxd	NA	NA	NA	babo	1	f	NA	0.654306	NA	70320
babo32_18_1wf	76.7	53.3	0.305085	8.55615	0.112487	0.0224975	0.0722873	0.0899899	0.0402	-960.664	1004	0.0111182	0.00555912	0.0111182	0.0076	0.013	0.0195	0.0259	0.0317	0.0488	0.0541	0.0608	0.07	0.079	0	0	0.137553	0.00415128	2389.18	20442.2	0.347826	49364.6	-36410	babo32	babo321f	experiment	babo(32)	tdtk x 60100	babo32_18_1wf_orca2_5s_070320,cxd	NA	NA	NA	babo	1	f	NA	0.654306	NA	70320
babo32_19_1wf	90.025	62.4	0.304073	7.11744	0.131305	0.0393916	0.0860553	0.0919137	0.04525	-1160.84	1111.03	0.00834314	0.0194673	0.0389346	0.00935	0.0157	0.02265	0.0297	0.0352	0.05545	0.06055	0.06695	0.07625	0.0834	0.00187579	0.00187579	0.189559	0.00845082	3307.52	23541.1	0.414634	42031.4	-68820.7	babo32	babo321f	experiment	babo(32)	tdtk x 60100	babo32_19_1wf_orca2_5s_070320,cxd	NA	NA	NA	babo	1	f	NA	0.654306	NA	70320
babo32_20_1wf	88.725	57.525	0.344553	8.3779	0.113364	0.0224855	0.0715642	0.0899419	0.0418	-1572.08	1411.55	0.0166685	0.0125014	0.0208356	0.0088	0.0142	0.0212	0.028	0.0329	0.0492	0.0532	0.0587	0.0668	0.0759	4.996e-15	4.66294e-15	0.147814	0.00830256	3597.05	30135.7	0.568182	30555.3	-61595.1	babo32	babo321f	experiment	babo(32)	tdtk x 60100	babo32_20_1wf_orca2_5s_070320,cxd	NA	NA	NA	babo	1	f	NA	0.654306	NA	70320
babo321f_01_1wf	79.95	53.625	0.321532	8.12918	0.116964	0.035989	0.0804644	0.0809753	0.0365	-1187.8	1261.91	0.0111161	0.0177858	0.0244554	0.00625	0.0111	0.0171	0.02375	0.0281	0.04535	0.05005	0.0566	0.06515	0.07305	-7.43849e-15	-7.43849e-15	0.226622	0.00719061	2760	22442.7	0.621622	18516.1	-42440.1	babo32	babo321f	experiment	babo(32)	tdtk x 60100	babo32_01_1wf_orca2_5s_040120,cxd	NA	NA	NA	babo	1	f	NA	0.654306	NA	70120
babo321f_02_1wf	90.35	63.05	0.316547	9.1314	0.104968	0.0269918	0.0721681	0.0779763	0.0328	-1221.1	1358.54	0.0133393	0.0088929	0.00666967	0.006	0.0096	0.0154	0.0212	0.0256	0.0406	0.0452	0.0522	0.0592	0.0668	0	0	0.122059	0.007413	3416.53	31197.7	0.410256	21346.9	-64308.8	babo32	babo321f	experiment	babo(32)	tdtk x 60100	babo32_02_1wf_orca2_5s_040120,cxd	NA	NA	NA	babo	1	f	NA	0.654306	NA	70120
babo321f_03_1wf	91	56.55	0.364286	8.01782	0.125961	0.038988	0.0829613	0.0869732	0.043	-1571.32	1499.07	0.0133393	0.0133393	0.0222322	0.006	0.0101	0.0164	0.0246	0.0306	0.0541	0.0589	0.0651	0.068	0.0696	4.02456e-16	-4.66294e-15	0.16027	0.00948864	3992.26	32009.2	0.470588	27457	-25328.2	babo32	babo321f	experiment	babo(32)	tdtk x 60100	babo32_03_1wf_orca2_5s_040120,cxd	NA	NA	NA	babo	1	f	NA	0.654306	NA	70120
babo321f_04_1wf	82.225	51.5125	0.371168	7.68374	0.127462	0.0382386	0.0901619	0.0832251	0.0373	-1388.54	1552.18	0.014451	0.0111162	0.023344	0.00715	0.01105	0.0165	0.0222	0.0269	0.04835	0.05395	0.06125	0.0712	0.0858	-0.00149955	-0.00149955	0.165187	0.0109712	3232.16	24800.3	0.333333	18201.9	-50482.1	babo32	babo321f	experiment	babo(32)	tdtk x 60100	babo32_04_1wf_orca2_5s_040120,cxd	NA	NA	NA	babo	1	f	NA	0.654306	NA	70120
babo321f_05_1wf	87.75	50.7	0.4	8.01782	0.119964	0.029991	0.0759638	0.0869738	0.044	-1589.37	1318.45	0.0133394	0.00889292	0.0177858	0.008	0.0139	0.021	0.028	0.0339	0.0523	0.0563	0.062	0.0713	0.0801	0	-5.55112e-17	0.183949	0.0109712	4028.76	32301.8	0.451613	14812.7	-30876.8	babo32	babo321f	experiment	babo(32)	tdtk x 60100	babo32_05_1wf_orca2_5s_040120,cxd	NA	NA	NA	babo	1	f	NA	0.654306	NA	70120
babo321f_06_1wf	81.25	50.7	0.372874	8.90869	0.104969	0.026992	0.068969	0.0839752	0.036	-1370.82	1652.57	0.0133395	0.00889298	0.017786	0.0057	0.0101	0.0156	0.0214	0.0259	0.0448	0.0502	0.0576	0.0679	0.0732	-2.22045e-16	-4.996e-15	0.170417	0.014233	3166	28204.9	0.864865	10189.9	-16445.3	babo32	babo321f	experiment	babo(32)	tdtk x 60100	babo32_06_1wf_orca2_5s_040120,cxd	NA	NA	NA	babo	1	f	NA	0.654306	NA	70120
babo321f_07_1wf	70.2	48.75	0.305556	9.35412	0.104968	0.0209937	0.0685683	0.0779764	0.0364	-1016.58	1099.92	0.0111161	0.0177858	0.0266787	0.0052	0.0088	0.0147	0.0212	0.0268	0.0448	0.0496	0.0552	0.0639	0.07	0	-2.22045e-16	0.202825	0.00919212	2028.73	18977	NA	NA	NA	babo32	babo321f	experiment	babo(32)	tdtk x 60100	babo32_07_1wf_orca2_5s_040120,cxd	NA	NA	NA	babo	1	f	NA	0.654306	NA	70120
babo321f_08_1wf	70.85	43.875	0.359349	8.79733	0.110967	0.0314906	0.0744168	0.0764771	0.03655	-1354.85	1346.65	0.0111162	0.00889294	0.0133394	0.0057	0.00945	0.015	0.02105	0.027	0.0448	0.0488	0.0548	0.064	0.0734	0	-0.000749775	0.117346	0.00689409	2572.52	22491.5	0.375	16634.5	-43852.3	babo32	babo321f	experiment	babo(32)	tdtk x 60100	babo32_08_1wf_orca2_5s_040120,cxd	NA	NA	NA	babo	1	f	NA	0.654306	NA	70120
babo321f_09_1wf	90.35	61.425	0.321429	9.79955	0.0989701	0.0149955	0.0614701	0.0809756	0.0375	-1502.35	1423.54	0.00666969	0.0133394	0.0133394	0.0082	0.0126	0.018	0.024	0.0285	0.0468	0.0514	0.0567	0.063	0.071	0.00299909	0.00149955	0.145587	0.00489258	3447.97	33788.6	0.325581	25343.3	-29336.3	babo32	babo321f	experiment	babo(32)	tdtk x 60100	babo32_09_1wf_orca2_5s_040120,cxd	NA	NA	NA	babo	1	f	NA	0.654306	NA	70120
babo321f_10_1wf	74.75	49.4	0.324506	8.46325	0.110967	0.0299911	0.0717681	0.0779769	0.0362	-1169.21	1305.8	0.0177859	0.00889297	0.0133395	0.007	0.012	0.0176	0.0235	0.0282	0.0458	0.0504	0.0569	0.0646	0.0754	8.88178e-16	4.996e-16	0.211197	0.00756126	2561.48	21678.5	0.358974	14518.9	-64911.5	babo32	babo321f	experiment	babo(32)	tdtk x 60100	babo32_10_1wf_orca2_5s_040120,cxd	NA	NA	NA	babo	1	f	NA	0.654306	NA	70120
babo321f_11_1wf	83.2	53.3	0.354331	8.68597	0.112466	0.0314905	0.0750661	0.0809756	0.0374	-1239.26	1322.62	0.00889292	0.0111161	0.0111161	0.0064	0.0106	0.0164	0.0228	0.0286	0.0474	0.0536	0.061	0.0712	0.0766	0	0	0.111716	0.015419	3205.48	27842.7	0.388889	21778.1	-16812.6	babo32	babo321f	experiment	babo(32)	tdtk x 60100	babo32_11_1wf_orca2_5s_040120,cxd	NA	NA	NA	babo	1	f	NA	0.654306	NA	70120
babo321f_12_1wf	89.7	54.6	0.391304	8.24053	0.122963	0.0374887	0.082363	0.0839747	0.0406	-1622.56	1358.97	0.00889293	0.0177859	0.0244555	0.008	0.0126	0.0196	0.027	0.0322	0.0494	0.0536	0.059	0.0675	0.0762	-0.00149955	9.71445e-16	0.154478	0.00859908	3977.99	32780.7	0.4	29033.5	-23486.2	babo32	babo321f	experiment	babo(32)	tdtk x 60100	babo32_12_1wf_orca2_5s_040120,cxd	NA	NA	NA	babo	1	f	NA	0.654306	NA	70120
babo321f_13_1wf	90.35	55.25	0.369231	8.24053	0.115465	0.0284914	0.0754652	0.0839747	0.04	-1593.27	1540.55	0.0133394	0.0111162	0.0333485	0.0086	0.0138	0.0196	0.0264	0.0312	0.048	0.0528	0.0586	0.0654	0.0736	0.0029991	0.0029991	0.168145	0.0059304	4013.82	33076.1	0.648649	27600.6	-67169	babo32	babo321f	experiment	babo(32)	tdtk x 60100	babo32_13_1wf_orca2_5s_040120,cxd	NA	NA	NA	babo	1	f	NA	0.654306	NA	70120
babo321f_14_1wf	78	48.5875	0.376199	8.62745	0.109102	0.0153425	0.0681019	0.087793	0.041	-1477.52	1449.35	0.00884595	0.0176919	0.0227467	0.0087	0.01315	0.01955	0.0259	0.0317	0.0491	0.05345	0.05915	0.067	0.0761	4.996e-15	2.498e-15	0.242185	0.0051891	2931.52	25291.5	0.727273	24959.1	-57843.3	babo32	babo321f	experiment	babo(32)	tdtk x 60100	babo32_14_1wf_orca2_5s_040120,cxd	NA	NA	NA	babo	1	f	NA	0.654306	NA	70120
babo321f_15_1wf	91.325	58.825	0.355819	8.54617	0.108718	0.0186859	0.0691177	0.0840864	0.0396	-1597.97	1552.71	0.0138518	0.0125926	0.0176296	0.0084	0.0135	0.0201	0.0263	0.0312	0.0474	0.05205	0.05715	0.064	0.0723	2.22045e-16	3.05311e-16	0.203507	0.0051891	3763.62	32170.2	0.395349	33473.1	-44659.5	babo32	babo321f	experiment	babo(32)	tdtk x 60100	babo32_15_1wf_orca2_5s_040120,cxd	NA	NA	NA	babo	1	f	NA	0.654306	NA	70120
babo321f_16_1wf	91	59.475	0.340546	9.23379	0.109567	0.0101923	0.0688671	0.0849358	0.0407	-1750.38	1546.85	0.0151111	0.0163703	0.0151111	0.0083	0.0136	0.0195	0.0259	0.0311	0.0504	0.0553	0.0601	0.0665	0.07195	0.00509615	0.00509615	0.199964	0.00941451	3725.63	34401.7	0.690476	43505.7	-44358.8	babo32	babo321f	experiment	babo(32)	tdtk x 60100	babo32_16_1wf_orca2_5s_040120,cxd	NA	NA	NA	babo	1	f	NA	0.654306	NA	70120
babo321f_17_1wf	96.525	66.625	0.308107	7.69231	0.123714	0.0321996	0.0848141	0.0872777	0.0389	-1205.52	1401.71	0.0163318	0.0175881	0.0226132	0.00825	0.0136	0.02	0.02625	0.0307	0.04705	0.0518	0.0587	0.06795	0.07635	-0.00169471	-0.00169471	0.202456	0.00770952	3849.9	29497.5	0.210526	40183.8	-31655	babo32	babo321f	experiment	babo(32)	tdtk x 60100	babo32_17_1wf_orca2_5s_040120,cxd	NA	NA	NA	babo	1	f	NA	0.654306	NA	70120
babo321f_18_1wf	90.35	57.85	0.345853	9.28854	0.104824	0.0219793	0.0657241	0.0845356	0.0391	-1674.83	1521.45	0.0175465	0.0125332	0.0200532	0.0076	0.0119	0.0178	0.0245	0.0298	0.0476	0.0519	0.0574	0.06215	0.0671	0	-1.38778e-17	0.150943	0.007413	3775.9	35072.6	0.5	32832	-73486.2	babo32	babo321f	experiment	babo(32)	tdtk x 60100	babo32_18_1wf_orca2_5s_040120,cxd	NA	NA	NA	babo	1	f	NA	0.654306	NA	70120
babo32dppd14_01_1wf	68.575	45.175	0.337162	6.84307	0.129914	0.0292763	0.0855137	0.0951481	0.0444	-918.282	981.888	0.0135641	0.0217025	0.0176333	0.0062	0.0106	0.0172	0.0241	0.0322	0.05485	0.0598	0.0671	0.08	0.08845	-4.9058e-15	-5.46785e-15	0.239333	0.00904386	2093.85	14312.2	0.0285714	4584.14	-19760.5	babo32dppd14	babo32dppd141f	experiment	babo(32)	tdtk x dpp(d14)	babo32dppd14_01_1wf_orca2_5s_070320,cxd	NA	NA	NA	babo dpp	1	f		0.654306		70320
babo32dppd14_02_1wf	72.15	47.45	0.342342	7.65125	0.123802	0.0262611	0.0768021	0.101293	0.047	-979.123	1087.91	0.0166863	0.0139052	0.00834314	0.0072	0.013	0.0196	0.0268	0.0332	0.0588	0.064	0.0712	0.0816	0.0861	0.00187579	0.00375158	0.181484	0.00785778	2320.16	17752.1	0.261905	36734.5	-16403.9	babo32dppd14	babo32dppd141f	experiment	babo(32)	tdtk x dpp(d14)	babo32dppd14_02_1wf_orca2_5s_070320,cxd	NA	NA	NA	babo dpp	1	f		0.654306		70320
babo32dppd14_03_1wf	67.925	45.9875	0.314	6.04982	0.150143	0.0394126	0.0985932	0.106039	0.05155	-842.921	1069.57	0.0222602	0.0194777	0.0333903	0.00685	0.0113	0.01725	0.02425	0.03235	0.0629	0.0699	0.07855	0.0915	0.102	5.10703e-15	0.00187679	0.186297	0.0189032	1964.56	11885.3	0.6	21974.3	-9026.43	babo32dppd14	babo32dppd141f	experiment	babo(32)	tdtk x dpp(d14)	babo32dppd14_03_1wf_orca2_5s_070320,cxd	NA	NA	NA	babo dpp	1	f		0.654306		70320
babo32dppd14_04_1wf	85.15	56.55	0.328244	7.29537	0.116361	0.0112607	0.061761	0.1051	0.0546	-1110.81	1119.26	0.0111301	0.0111301	0.0111301	0.0096	0.0154	0.023	0.0312	0.0424	0.0624	0.0676	0.076	0.087	0.093	0	0	0.320837	0.00800604	3182.92	23220.6	0.636364	40021.4	-37641	babo32dppd14	babo32dppd141f	experiment	babo(32)	tdtk x dpp(d14)	babo32dppd14_04_1wf_orca2_5s_070320,cxd	NA	NA	NA	babo dpp	1	f		0.654306		70320
babo32dppd14_05_1wf	81.9	50.05	0.393701	7.29537	0.131375	0.00750716	0.0865753	0.1051	0.045	-1283.98	1360	0.0166952	0.0194777	0.0111301	0.0076	0.0124	0.02	0.0275	0.0328	0.059	0.0642	0.0717	0.0823	0.0902	8.88178e-16	1.06581e-14	0.204806	0.0103782	3300.72	24080	0.264706	54299.3	-27364.7	babo32dppd14	babo32dppd141f	experiment	babo(32)	tdtk x dpp(d14)	babo32dppd14_05_1wf_orca2_5s_070320,cxd	NA	NA	NA	babo dpp	1	f		0.654306		70320
babo32dppd14_06_1wf	68.25	44.85	0.342857	6.9395	0.135129	0.0487965	0.0957289	0.0863323	0.0394	-732.634	1078.97	0.0166952	0.0111301	0.0250428	0.0058	0.009	0.0152	0.0206	0.0256	0.0476	0.0522	0.0628	0.0798	0.0886	0.00187679	1.02141e-14	0.17278	0.0266868	2078.59	14424.4	0.34375	19339.6	-30138.8	babo32dppd14	babo32dppd141f	experiment	babo(32)	tdtk x dpp(d14)	babo32dppd14_06_1wf_orca2_5s_070320,cxd	NA	NA	NA	babo dpp	1	f		0.654306		70320
babo32dppd14_07_1wf	75.8875	47.6125	0.373277	7.38434	0.127554	0.0300126	0.0855037	0.0937895	0.04285	-1138.67	1235.36	0.0125147	0.0111242	0.0250294	0.00825	0.01375	0.0208	0.02745	0.03295	0.05175	0.056	0.06285	0.07345	0.0837	4.16334e-17	5.55112e-17	0.174594	0.00748713	2797.83	20687.5	0.487805	16627.7	-8556.32	babo32dppd14	babo32dppd141f	experiment	babo(32)	tdtk x dpp(d14)	babo32dppd14_07_1wf_orca2_5s_070320,cxd	NA	NA	NA	babo dpp	1	f		0.654306		70320
babo32dppd14_08_1wf	80.275	52.65	0.334635	7.1048	0.131515	0.0413334	0.0854653	0.090182	0.04605	-1124.39	1174.13	0.00557099	0.011142	0.00835649	0.00875	0.014	0.021	0.0279	0.03375	0.0562	0.0611	0.0698	0.07375	0.0838	0	0	0.163494	0.00681996	2886.76	20509.8	0.210526	19690.2	NA	babo32dppd14	babo32dppd141f	experiment	babo(32)	tdtk x dpp(d14)	babo32dppd14_08_1wf_orca2_5s_070320,cxd	NA	NA	NA	babo dpp	1	f		0.654306		70320
babo32dppd14_09_1wf	80.275	54.275	0.304968	8.09609	0.118238	0.0206447	0.0752878	0.0882091	0.04295	-1065.44	989.149	0.0166952	0.0306078	0.0306078	0.00725	0.013	0.02005	0.02695	0.03225	0.05135	0.0559	0.06195	0.0717	0.0805	1.11022e-16	-2.33147e-15	0.250111	0.00808017	2748.22	22258.3	0.604651	36983.5	-21438.4	babo32dppd14	babo32dppd141f	experiment	babo(32)	tdtk x dpp(d14)	babo32dppd14_09_1wf_orca2_5s_070320,cxd	NA	NA	NA	babo dpp	1	f		0.654306		70320
babo32dppd14_10_1wf	77.35	46.475	0.394785	6.9395	0.13614	0.0403725	0.0974398	0.0938895	0.0387	-1078.4	1360.2	0.011136	0.0153121	0.0250561	0.0077	0.0125	0.0184	0.025	0.0297	0.0468	0.0526	0.0611	0.0749	0.0846	-0.00187779	-0.00187779	0.154573	0.0146777	3002.9	20838.6	0.527778	12394.9	-14567.2	babo32dppd14	babo32dppd141f	experiment	babo(32)	tdtk x dpp(d14)	babo32dppd14_10_1wf_orca2_5s_070320,cxd	NA	NA	NA	babo dpp	1	f		0.654306		70320
babo32dppd14_11_1wf	81.25	50.7	0.376	7.11744	0.138808	0.0487705	0.100708	0.0919137	0.0381	-1195.5	1286.46	0.0139052	0.0166863	0.0222484	0.0072	0.0122	0.0182	0.0245	0.0296	0.0469	0.0521	0.0593	0.0695	0.082	-0.00375158	-0.00187579	0.142177	0.0081543	3166	22533.8	0.641026	17296.4	-30208.9	babo32dppd14	babo32dppd141f	experiment	babo(32)	tdtk x dpp(d14)	babo32dppd14_11_1wf_orca2_5s_070320,cxd	NA	NA	NA	babo dpp	1	f		0.654306		70320
babo32dppd14_12_1wf	66.95	40.3	0.39283	7.63766	0.124	0.0272425	0.0874002	0.0939395	0.0366	-927.273	1365.77	0.0139275	0.011142	0.0194985	0.0055	0.0085	0.0135	0.02	0.0266	0.048	0.0554	0.0659	0.0784	0.0872	0	0	0.107911	0.0096369	2247.82	17168.1	0.55	6077.35	-7447.07	babo32dppd14	babo32dppd141f	experiment	babo(32)	tdtk x dpp(d14)	babo32dppd14_12_1wf_orca2_5s_070320,cxd	NA	NA	NA	babo dpp	1	f		0.654306		70320
babo32dppd14_13_1wf	64.35	45.5	0.245098	7.82918	0.123868	0.0243983	0.0890681	0.0863323	0.0348	-696.608	751.707	0.0278253	0.0111301	0.0222602	0.0049	0.0089	0.0145	0.021	0.0261	0.0452	0.0537	0.0638	0.0788	0.0931	0	0	0.25437	0.0237216	1385.73	10602.5	0.361111	6230.95	-35948.6	babo32dppd14	babo32dppd141f	experiment	babo(32)	tdtk x dpp(d14)	babo32dppd14_13_1wf_orca2_5s_070320,cxd	NA	NA	NA	babo dpp	1	f		0.654306		70320
babo32dppd14_14_1wf	67.275	42.25	0.356102	8.18505	0.112607	0.00375358	0.0694074	0.1051	0.0432	-918.544	1065.36	0.0222602	0.0166952	0.00556506	0.0082	0.0133	0.0202	0.028	0.0342	0.0534	0.0599	0.0686	0.0788	0.089	0.00375358	0.00375358	0.197989	0.0240181	2152.67	17619.7	0.52381	14913.3	-24566.3	babo32dppd14	babo32dppd141f	experiment	babo(32)	tdtk x dpp(d14)	babo32dppd14_14_1wf_orca2_5s_070320,cxd	NA	NA	NA	babo dpp	1	f		0.654306		70320
babo32dppd14_15_1wf	72.15	47.775	0.331068	7.65125	0.12293	0.0234599	0.0808297	0.0975931	0.0421	-940.343	1077.27	0.0139126	0.0180864	0.026434	0.0084	0.0137	0.0203	0.027	0.0328	0.0519	0.0567	0.0635	0.0756	0.08705	-2.22045e-16	-5.32907e-15	0.222526	0.00756126	2303.4	17623.9	0.28125	17938.4	-9484.92	babo32dppd14	babo32dppd141f	experiment	babo(32)	tdtk x dpp(d14)	babo32dppd14_15_1wf_orca2_5s_070320,cxd	NA	NA	NA	babo dpp	1	f		0.654306		70320
babo32dppd14_16_1wf	73.45	44.85	0.367925	9.07473	0.108912	0.00751116	0.0679118	0.0976451	0.041	-1265.83	1421.94	0.0167041	0.00835204	0.011136	0.0094	0.0142	0.0196	0.0256	0.031	0.0496	0.0542	0.0614	0.072	0.0818	2.77556e-17	0	0.12319	0.0139364	2657.3	24114.3	0.607843	17317.6	-67782.8	babo32dppd14	babo32dppd141f	experiment	babo(32)	tdtk x dpp(d14)	babo32dppd14_16_1wf_orca2_5s_070320,cxd	NA	NA	NA	babo dpp	1	f		0.654306		70320
babo32dppd14_17_1wf	80.6	53.95	0.350746	6.42202	0.134589	0.0436504	0.0924511	0.0945758	0.0418	-879.718	1150.05	0.010786	0.016179	0.016179	0.0076	0.0126	0.0194	0.0258	0.031	0.0526	0.0578	0.0658	0.079	0.0906	-0.00181877	-9.88098e-15	0.267374	0.00978516	2961.26	20669.7	0.294118	19288.1	-24925.9	babo32dppd14	babo32dppd141f	experiment	babo(32)	tdtk x dpp(d14)	babo32dppd14_17_1wf_orca2_5s_070320,cxd	NA	NA	NA	babo dpp	1	f		0.654306		70320
babo32dppd14_18_1wf	78.65	50.05	0.368852	7.65125	0.123802	0.0262611	0.0768021	0.0937895	0.044	-1176.56	1120.15	0.0111242	0.0111242	0.0139052	0.0092	0.0152	0.023	0.0298	0.0356	0.0538	0.0594	0.067	0.0754	0.0852	5.10703e-15	1.02141e-14	0.133339	0.0059304	2890.91	22119.1	0.358974	19057.7	-40152.4	babo32dppd14	babo32dppd141f	experiment	babo(32)	tdtk x dpp(d14)	babo32dppd14_18_1wf_orca2_5s_070320,cxd	NA	NA	NA	babo dpp	1	f		0.654306		70320
babo32dppd14_19_1wf	81.575	51.025	0.348219	6.40569	0.136933	0.03564	0.0930826	0.0947274	0.04385	-1169.51	1260.95	0.0166863	0.0194673	0.0222484	0.0071	0.0118	0.01795	0.02555	0.03215	0.05285	0.05735	0.06435	0.07595	0.0873	-0.00375158	-0.00281368	0.264184	0.0133434	3187.57	20418.6	0.457143	24204.8	-76346.4	babo32dppd14	babo32dppd141f	experiment	babo(32)	tdtk x dpp(d14)	babo32dppd14_19_1wf_orca2_5s_070320,cxd	NA	NA	NA	babo dpp	1	f		0.654306		70320
babo32dppd14_20_1wf	62.075	44.525	0.25	8.00712	0.116299	0.0337642	0.0819368	0.0806589	0.0353	-648.764	1033.41	0.0194673	0.0139052	0.0222484	0.0054	0.0095	0.0152	0.0213	0.0257	0.0447	0.0509	0.0572	0.068	0.07675	2.35922e-15	-1.11022e-16	0.192049	0.00956277	1456.07	11765.2	0.512821	17988.5	-45028.7	babo32dppd14	babo32dppd141f	experiment	babo(32)	tdtk x dpp(d14)	babo32dppd14_20_1wf_orca2_5s_070320,cxd	NA	NA	NA	babo dpp	1	f		0.654306		70320
babo32dppd141f_01_1wf	71.5	41.6	0.411765	7.63209	0.1194	0.0204686	0.0726003	0.0989316	0.0468	-1040.62	1138.33	0.0101156	0.00758669	0.0101156	0.0064	0.0108	0.0186	0.027	0.0348	0.0574	0.063	0.0712	0.083	0.0933	0.00170572	9.76996e-15	0.159287	0.00548562	2655.97	20270.6	0.53125	38940.1	-25381.1	babo32dppd14	babo32dppd141f	experiment	babo(32)	tdtk x dpp(d14)	babo32dppd14_01_1wf_orca2_5s_040120,cxd	NA	NA	NA	babo	1	f		0.654306		70120
babo32dppd141f_02_1wf	78	51.025	0.348505	6.917	0.13103	0.0278967	0.0877755	0.0980613	0.0438	-980.357	1200.04	0.0175465	0.0275731	0.0338398	0.008	0.0134	0.0201	0.0268	0.0329	0.05425	0.0605	0.0678	0.0796	0.0882	5.60663e-15	0.00169071	0.261241	0.00874734	2776.76	19470.8	0.666667	18597.7	-110993	babo32dppd14	babo32dppd141f	experiment	babo(32)	tdtk x dpp(d14)	babo32dppd14_02_1wf_orca2_5s_040120,cxd	NA	NA	NA	babo dpp	1	f		0.654306		70120
babo32dppd141f_03_1wf	69.55	42.9	0.383178	6.70611	0.142356	0.0406731	0.100756	0.0999881	0.0416	-953.224	1150.64	0.0201007	0.0201007	0.030151	0.0076	0.012	0.0185	0.0262	0.0325	0.0541	0.0623	0.0699	0.0808	0.0976	0.00677885	0.00338943	0.163204	0.0177912	2353.68	15784	0.194444	47809.4	-52083.2	babo32dppd14	babo32dppd141f	experiment	babo(32)	tdtk x dpp(d14)	babo32dppd14_03_1wf_orca2_5s_040120,cxd	NA	NA	NA	babo dpp	1	f		0.654306		70120
babo32dppd141f_04_1wf	74.1	50.05	0.322581	6.44531	0.147208	0.0342344	0.110585	0.102703	0.0358	-1219.75	1541.95	0.0304536	0.0279158	0.0355292	0.0058	0.0092	0.014	0.0214	0.0264	0.047	0.0562	0.0782	0.096	0.0996	0.00342344	0.00342344	0.195734	0.015419	2345.05	15114.6	0.413793	20259	-20212.5	babo32dppd14	babo32dppd141f	experiment	babo(32)	tdtk x dpp(d14)	babo32dppd14_04_1wf_orca2_5s_040120,cxd	NA	NA	NA	babo dpp	1	f		0.654306		70120
babo32dppd141f_05_1wf	74.1	44.85	0.372727	7.22656	0.129939	0.0376138	0.0869387	0.0957443	0.043	-1099.44	1058.34	0.015209	0.015209	0.0202786	0.0066	0.0122	0.0198	0.0272	0.0324	0.052	0.0574	0.064	0.0748	0.0867	-0.00341944	-0.00341944	0.180179	0.00548562	2732.63	19747.5	0.394737	21577.9	-29269.8	babo32dppd14	babo32dppd141f	experiment	babo(32)	tdtk x dpp(d14)	babo32dppd14_05_1wf_orca2_5s_040120,cxd	NA	NA	NA	babo dpp	1	f		0.654306		70120
babo32dppd141f_06_1wf	65.325	43.55	0.333317	7.26916	0.125853	0.0348647	0.084453	0.0952401	0.0414	-782.461	973.557	0.0100859	0.0151289	0.0252148	0.0065	0.0112	0.018	0.0252	0.0309	0.0526	0.0595	0.0674	0.08035	0.0906	-0.000850358	-1.11022e-16	0.183183	0.00911799	1862.07	13535.7	0.171429	21680.5	-25791	babo32dppd14	babo32dppd141f	experiment	babo(32)	tdtk x dpp(d14)	babo32dppd14_06_1wf_orca2_5s_040120,cxd	NA	NA	NA	babo dpp	1	f		0.654306		70120
babo32dppd141f_07_1wf	90.8375	60.125	0.335542	7.42188	0.129863	0.0307569	0.0865126	0.0948339	0.04335	-1141.21	1301.38	0.0152001	0.0126667	0.0228001	0.0077	0.0135	0.02085	0.0273	0.0329	0.05415	0.0597	0.06725	0.0791	0.0904	0.00341744	0.00341744	0.138417	0.0119349	3617.99	26852.3	0.852941	19990	-18827.4	babo32dppd14	babo32dppd141f	experiment	babo(32)	tdtk x dpp(d14)	babo32dppd14_07_1wf_orca2_5s_040120,cxd	NA	NA	NA	babo dpp	1	f		0.654306		70120
babo32dppd141f_08_1wf	75.725	48.75	0.347036	6.81818	0.139401	0.0168971	0.104301	0.109831	0.0351	-865.452	1406.67	0.030062	0.0237991	0.0237991	0.00735	0.01185	0.0172	0.0227	0.02665	0.04715	0.0546	0.06755	0.0852	0.104	-0.00253457	-0.00168971	0.261836	0.0195703	2638.88	18016.4	0.628571	28065.6	-102674	babo32dppd14	babo32dppd141f	experiment	babo(32)	tdtk x dpp(d14)	babo32dppd14_08_1wf_orca2_5s_040120,cxd	NA	NA	NA	babo dpp	1	f		0.654306		70120
babo32dppd141f_09_1wf	70.85	47.45	0.333333	7.29783	0.130339	0.0440105	0.0937388	0.0846356	0.0366	-799.133	1214.27	0.0150577	0.0200769	0.0301154	0.0066	0.0118	0.0172	0.0226	0.0274	0.0462	0.0516	0.0616	0.0748	0.0888	-0.00338542	-0.00338542	0.179147	0.0128986	2174.15	15866.6	0.138889	12561.2	-13956.9	babo32dppd14	babo32dppd141f	experiment	babo(32)	tdtk x dpp(d14)	babo32dppd14_09_1wf_orca2_5s_040120,cxd	NA	NA	NA	babo dpp	1	f		0.654306		70120
babo32dppd141f_10_1wf	72.3125	45.175	0.36935	7.49507	0.123641	0.0254057	0.0839411	0.0956948	0.0397	-1133.64	1237.16	0.0125555	0.0200888	0.0301332	0.00745	0.01225	0.0183	0.02425	0.0293	0.052	0.0583	0.06425	0.0747	0.085	-5.32907e-15	-0.00169371	0.200688	0.00993342	2506.86	18789.1	0.243243	78117	-56644.6	babo32dppd14	babo32dppd141f	experiment	babo(32)	tdtk x dpp(d14)	babo32dppd14_10_1wf_orca2_5s_040120,cxd	NA	NA	NA	babo dpp	1	f		0.654306		70120
babo32dppd141f_11_1wf	74.75	46.8	0.327586	7.48031	0.132422	0.0305589	0.0968217	0.0933743	0.0358	-1052.89	1335	0.0226533	0.0251703	0.0251703	0.0054	0.0095	0.0149	0.0222	0.028	0.0478	0.055	0.0648	0.0726	0.0848	0.00679086	0.00339543	0.194022	0.0186808	2472.06	18491.8	0.228571	19174.3	-14473.9	babo32dppd14	babo32dppd141f	experiment	babo(32)	tdtk x dpp(d14)	babo32dppd14_11_1wf_orca2_5s_040120,cxd	NA	NA	NA	babo dpp	1	f		0.654306		70120
babo32dppd141f_12_1wf	76.7	47.45	0.381356	7.9922	0.120031	0.0120031	0.0794305	0.102883	0.0406	-1044.75	1271.27	0.020338	0.0152535	0.0177957	0.0066	0.0116	0.018	0.0254	0.0308	0.0542	0.0604	0.0684	0.0784	0.0898	0.00685889	0.00685889	0.168068	0.00978516	2852.09	22794.4	0.0769231	86037.8	-61089.3	babo32dppd14	babo32dppd141f	experiment	babo(32)	tdtk x dpp(d14)	babo32dppd14_12_1wf_orca2_5s_040120,cxd	NA	NA	NA	babo dpp	1	f		0.654306		70120
babo32dppd141f_13_1wf	78.975	51.675	0.338847	7.70751	0.124194	0.0380185	0.0845938	0.0861753	0.0396	-1075.13	1183.63	0.0125258	0.015031	0.0162836	0.0067	0.0117	0.0179	0.0245	0.0298	0.0488	0.0535	0.0602	0.0707	0.08185	0.00253457	0.00337942	0.147694	0.00763539	2808.62	21647.4	0.324324	30317.3	-28962.8	babo32dppd14	babo32dppd141f	experiment	babo(32)	tdtk x dpp(d14)	babo32dppd14_13_1wf_orca2_5s_040120,cxd	NA	NA	NA	babo dpp	1	f		0.654306		70120
babo32dppd141f_14_1wf	74.1	50.7	0.315789	7.42188	0.136858	0.0342144	0.0934576	0.0958003	0.0434	-949.892	1024.88	0.0152179	0.0202905	0.0304358	0.0063	0.0118	0.0188	0.0249	0.0314	0.0558	0.063	0.0712	0.082	0.0892	0	-5.10703e-15	0.121509	0.0106747	2293.61	17022.9	0.1875	19028.5	-29564	babo32dppd14	babo32dppd141f	experiment	babo(32)	tdtk x dpp(d14)	babo32dppd14_14_1wf_orca2_5s_040120,cxd	NA	NA	NA	babo dpp	1	f		0.654306		70120
babo32dppd141f_15_1wf	80.925	49.725	0.385548	7.22656	0.131571	0.0401549	0.0907714	0.0956883	0.0408	-1218.31	1187.47	0.0152001	0.0164668	0.0240668	0.006	0.0111	0.0185	0.0266	0.0319	0.0512	0.0567	0.0641	0.0739	0.0893	0.00256308	0.00170872	0.131322	0.00585627	3201.5	23135.9	0.114286	18003.2	-44812.2	babo32dppd14	babo32dppd141f	experiment	babo(32)	tdtk x dpp(d14)	babo32dppd14_15_1wf_orca2_5s_040120,cxd	NA	NA	NA	babo dpp	1	f		0.654306		70120
babo32dppd141f_16_1wf	66.95	42.575	0.359223	7.00389	0.133826	0.0411773	0.0837263	0.092649	0.0501	-1115.5	968.17	0.0101749	0.0152624	0.0152624	0.0056	0.0104	0.0172	0.0261	0.0347	0.0604	0.0649	0.0712	0.0784	0.0889	4.44089e-16	0.00171572	0.125359	0.00770952	2096.76	14685.4	0.0816327	14551.7	-23724.5	babo32dppd14	babo32dppd141f	experiment	babo(32)	tdtk x dpp(d14)	babo32dppd14_16_1wf_orca2_5s_040120,cxd	NA	NA	NA	babo dpp	1	f		0.654306		70120
dppd14_01_1wf	93.925	57.6875	0.388026	8.09609	0.116423	0.0244113	0.076823	0.0938895	0.0396	-1588.99	1582.43	0.0139201	0.00696003	0.0167041	0.0067	0.01065	0.0177	0.0254	0.0308	0.04695	0.0512	0.0593	0.0731	0.08795	4.88498e-15	4.88498e-15	0.155916	0.00770952	4295.34	34783.1	0.304348	20241.5	-40529.4	dppd14	dppd141f	experiment	dpp(d14)	tdtk x 60100	dppd14_01_1wf_orca2_5s_070320,cxd	NA	NA	NA	dpp	1	f	NA	0.654306	NA	70320
dppd14_02_1wf	93.275	55.9	0.396727	6.9395	0.137944	0.0337822	0.0957441	0.103223	0.0422	-1396.44	1556.29	0.0222602	0.0180864	0.026434	0.0077	0.0123	0.0186	0.0275	0.0331	0.0504	0.056	0.065	0.0752	0.09035	0.00281519	0.00375358	0.151456	0.00859908	4388.63	30454.9	0.425	33933.2	-79835.7	dppd14	dppd141f	experiment	dpp(d14)	tdtk x 60100	dppd14_02_1wf_orca2_5s_070320,cxd	NA	NA	NA	dpp	1	f	NA	0.654306	NA	70320
dppd14_03_1wf	86.45	50.7	0.413534	7.1048	0.135417	0.0338542	0.093817	0.099682	0.0416	-1265.76	1429.92	0.0167308	0.0167308	0.0223077	0.0084	0.0136	0.0206	0.0269	0.0319	0.0513	0.0563	0.0637	0.075	0.0881	0.00376158	0.00376158	0.140288	0.00919212	3850.9	27359.8	0.375	20177.1	-35484	dppd14	dppd141f	experiment	dpp(d14)	tdtk x 60100	dppd14_03_1wf_orca2_5s_070320,cxd	NA	NA	NA	dpp	1	f	NA	0.654306	NA	70320
dppd14_04_1wf	96.85	53.95	0.416107	7.30838	0.13311	0.0299966	0.08531	0.097489	0.0478	-1805.41	1619.37	0.0111182	0.0166774	0.0194569	0.011	0.0172	0.0236	0.032	0.0382	0.0558	0.0606	0.0658	0.0744	0.0894	-9.85323e-16	-9.99201e-16	0.116831	0.00504084	4855.35	35484.7	0.075	16186.1	-36324.1	dppd14	dppd141f	experiment	dpp(d14)	tdtk x 60100	dppd14_04_1wf_orca2_5s_070320,cxd	NA	NA	NA	dpp	1	f	NA	0.654306	NA	70320
dppd14_05_1wf	80.6	48.425	0.395622	7.48663	0.125611	0.0206227	0.0800109	0.097489	0.0456	-1409.52	1244.43	0.0111182	0.0194569	0.0277956	0.00995	0.0159	0.02305	0.0308	0.03625	0.05375	0.059	0.0653	0.0744	0.0839	0.00187479	0.00187479	0.168916	0.007413	3265.71	24449.2	0.302326	38506.8	-63249.5	dppd14	dppd141f	experiment	dpp(d14)	tdtk x 60100	dppd14_05_1wf_orca2_5s_070320,cxd	NA	NA	NA	dpp	1	f	NA	0.654306	NA	70320
dppd14_06_1wf	98.8	62.4	0.355263	7.28242	0.129637	0.0281819	0.0915578	0.101455	0.0368	-1105.41	1611.7	0.00557099	0.00835649	0.00835649	0.0062	0.0096	0.0152	0.0214	0.0268	0.0498	0.0576	0.066	0.0808	0.0926	0	0	0.171819	0.00800604	4479.71	32623.1	0.0487805	16743.9	-49926	dppd14	dppd141f	experiment	dpp(d14)	tdtk x 60100	dppd14_06_1wf_orca2_5s_070320,cxd	NA	NA	NA	dpp	1	f	NA	0.654306	NA	70320
dppd14_07_1wf	86.45	49.4	0.428571	6.78571	0.14218	0.0336742	0.0958214	0.0972809	0.0444	-1696.09	1645.8	0.0138681	0.0166418	0.0277363	0.0096	0.0146	0.0221	0.0298	0.0351	0.0537	0.0579	0.0641	0.0757	0.0886	0.00374157	0.00374157	0.20363	0.00993342	3953.1	26824.6	0.394737	18041	-86581.7	dppd14	dppd141f	experiment	dpp(d14)	tdtk x 60100	dppd14_07_1wf_orca2_5s_070320,cxd	NA	NA	NA	dpp	1	f	NA	0.654306	NA	70320
dppd14_08_1wf	103.025	56.225	0.4494	6.86275	0.13686	0.0337462	0.0871596	0.103113	0.0497	-2095.62	1644.69	0.0111182	0.0166774	0.0222365	0.0099	0.01545	0.0239	0.03255	0.039	0.05825	0.063	0.06915	0.0787	0.0915	-2.22045e-16	0	0.144616	0.00748713	5867.43	40325.9	0.125	16732.3	-40841.8	dppd14	dppd141f	experiment	dpp(d14)	tdtk x 60100	dppd14_08_1wf_orca2_5s_070320,cxd	NA	NA	NA	dpp	1	f	NA	0.654306	NA	70320
dppd14_09_1wf	88.725	53.95	0.397304	7.81528	0.120307	0.0225575	0.0822066	0.0977491	0.0381	-1294.72	1831.08	0.0111479	0.0111479	0.0139349	0.0068	0.0111	0.0169	0.02345	0.02855	0.0468	0.0514	0.0596	0.0742	0.08995	4.44089e-16	2.77556e-15	0.182207	0.00956277	3902.16	30496.5	0.272727	18641.7	-50843.4	dppd14	dppd141f	experiment	dpp(d14)	tdtk x 60100	dppd14_09_1wf_orca2_5s_070320,cxd	NA	NA	NA	dpp	1	f	NA	0.654306	NA	70320
dppd14_10_1wf	96.85	55.9	0.420344	7.11744	0.135129	0.0300286	0.0881289	0.106977	0.047	-1714.36	1502.23	0.0194777	0.0166952	0.0333903	0.0092	0.0142	0.0219	0.0296	0.0358	0.0571	0.0619	0.0681	0.0791	0.0933	-9.76996e-15	-4.88498e-15	0.103729	0.0171982	4912.75	34966.2	0.205128	123963	-68869	dppd14	dppd141f	experiment	dpp(d14)	tdtk x 60100	dppd14_10_1wf_orca2_5s_070320,cxd	NA	NA	NA	dpp	1	f	NA	0.654306	NA	70320
dppd14_11_1wf	91.65	53.3	0.41844	6.9395	0.138808	0.0431432	0.0924084	0.097541	0.0464	-1710.39	1430.51	0.0222484	0.0111242	0.0139052	0.0094	0.0142	0.0226	0.0302	0.0358	0.0546	0.059	0.0646	0.076	0.088	4.88498e-15	0	0.12098	0.0109712	4365.9	30297.1	0.410256	36548.4	-50171.1	dppd14	dppd141f	experiment	dpp(d14)	tdtk x 60100	dppd14_11_1wf_orca2_5s_070320,cxd	NA	NA	NA	dpp	1	f	NA	0.654306	NA	70320
dppd14_12_1wf	84.5	55.0875	0.354215	8.17052	0.118364	0.0225455	0.0782638	0.0939396	0.04015	-1203.36	1381.99	0.011142	0.011142	0.016713	0.0087	0.01405	0.02075	0.02665	0.03145	0.0491	0.0552	0.0619	0.0712	0.08075	2.77556e-17	0	0.147958	0.00504084	3225.68	26355.5	0.372093	22615.7	-35041.5	dppd14	dppd141f	experiment	dpp(d14)	tdtk x 60100	dppd14_12_1wf_orca2_5s_070320,cxd	NA	NA	NA	dpp	1	f	NA	0.654306	NA	70320
dppd14_13_1wf	90.35	55.9	0.385714	8.36299	0.114423	0.0150063	0.0746989	0.097541	0.0408	-1463.5	1515.11	0.00556209	0.00834314	0.00556209	0.0082	0.0118	0.0182	0.0238	0.03	0.051	0.0556	0.0622	0.0746	0.0886	-9.99201e-15	-1.02141e-14	0.138529	0.00578214	4013.82	33567.6	0.866667	23196.2	-11768.3	dppd14	dppd141f	experiment	dpp(d14)	tdtk x 60100	dppd14_13_1wf_orca2_5s_070320,cxd	NA	NA	NA	dpp	1	f	NA	0.654306	NA	70320
dppd14_14_1wf	77.35	51.35	0.332858	8.54093	0.112607	0.0243983	0.0742574	0.0844556	0.03835	-1093.12	1073.28	0.00834759	0.0111301	0.0111301	0.00725	0.01195	0.0188	0.02555	0.03015	0.0467	0.051	0.05795	0.06975	0.0793	0	1.38778e-17	0.126562	0.00570801	2629.09	22454.9	0.232558	17575.1	-18152.7	dppd14	dppd141f	experiment	dpp(d14)	tdtk x 60100	dppd14_14_1wf_orca2_5s_070320,cxd	NA	NA	NA	dpp	1	f	NA	0.654306	NA	70320
dppd14_15_1wf	78.975	44.85	0.422405	8.36299	0.112547	0.0215716	0.0717474	0.0937895	0.0408	-1358.43	1358.43	0.00834314	0.00556209	0.00556209	0.0075	0.0124	0.0188	0.0261	0.0314	0.0484	0.0526	0.0589	0.0703	0.08135	0	0	0.131649	0.00526323	3320.46	27769	0.446809	17502.2	-11410.3	dppd14	dppd141f	experiment	dpp(d14)	tdtk x 60100	dppd14_15_1wf_orca2_5s_070320,cxd	NA	NA	NA	dpp	1	f	NA	0.654306	NA	70320
dppd14_16_1wf	91	55.25	0.371429	6.96429	0.13829	0.0411133	0.0990902	0.0897018	0.0392	-1342.23	1654.37	0.0110827	0.0221653	0.0221653	0.0066	0.0112	0.017	0.0242	0.0294	0.0486	0.054	0.0626	0.0756	0.0819	-0.00186879	-1.11022e-15	0.173959	0.0127504	3992.26	27803.2	0.45	16698.6	-69389.1	dppd14	dppd141f	experiment	dpp(d14)	tdtk x 60100	dppd14_16_1wf_orca2_5s_070320,cxd	NA	NA	NA	dpp	1	f	NA	0.654306	NA	70320
dppd14_17_1wf	85.15	56.875	0.332051	7.86106	0.124288	0.0274165	0.0876883	0.0932162	0.0366	-959.36	1333.59	0.0135493	0.0108394	0.0162591	0.0062	0.0103	0.016	0.0222	0.0269	0.0476	0.0549	0.0641	0.0792	0.08775	-0.000913885	-4.44089e-15	0.123253	0.00956277	3154.22	24795.5	0.295455	31489.4	-78182.8	dppd14	dppd141f	experiment	dpp(d14)	tdtk x 60100	dppd14_17_1wf_orca2_5s_070320,cxd	NA	NA	NA	dpp	1	f	NA	0.654306	NA	70320
dppd14_18_1wf	88.4	57.85	0.375	6.76157	0.14639	0.0525501	0.105936	0.0900859	0.0367	-1162.05	1727.12	0.0111301	0.0111301	0.0166952	0.0059	0.01	0.0161	0.0215	0.0267	0.049	0.0583	0.0648	0.0813	0.0973	0	1.03251e-14	0.0906438	0.00859908	3768.19	25478.8	0.368421	34559.3	-35748.4	dppd14	dppd141f	experiment	dpp(d14)	tdtk x 60100	dppd14_18_1wf_orca2_5s_070320,cxd	NA	NA	NA	dpp	1	f	NA	0.654306	NA	70320
dppd14_19_1wf	101.4	55.9	0.442857	7.65125	0.127622	0.0225215	0.0843449	0.101347	0.0432	-1558.51	1651.14	0.0166952	0.0111301	0.0166952	0.0074	0.012	0.0194	0.0268	0.0332	0.0518	0.0566	0.0634	0.0762	0.0882	4.996e-16	9.99201e-16	0.138904	0.0111195	4809.89	36801.6	0	NA	-50275.4	dppd14	dppd141f	experiment	dpp(d14)	tdtk x 60100	dppd14_19_1wf_orca2_5s_070320,cxd	NA	NA	NA	dpp	1	f	NA	0.654306	NA	70320
dppd141f_01_1wf	87.1	51.35	0.407553	7.7821	0.123604	0.0274676	0.082504	0.092703	0.0411	-1320.47	1509.78	0.0101809	0.0152713	0.0203617	0.0062	0.0105	0.0171	0.0247	0.0308	0.0521	0.057	0.064	0.0719	0.0827	5.55112e-17	-4.85723e-15	0.104584	0.00726474	3887.4	30252.1	0.645161	34508.8	-63386.6	dppd14	dppd141f	experiment	dpp(d14)	tdtk x 60100	dppd14_01_1wf_orca2_5s_040120,cxd	NA	NA	NA	dpp	1	f	NA	0.654306	NA	70120
dppd141f_02_1wf	77.35	44.85	0.404267	8.28402	0.111851	0.0135577	0.0693511	0.0932092	0.0429	-1315.01	1346.98	0.0125629	0.0150755	0.0150755	0.0072	0.0123	0.0195	0.0266	0.0323	0.052	0.0559	0.0622	0.0718	0.0796	0	2.44249e-15	0.19056	0.007413	3119.21	25839.6	0.488372	33495.1	-68581.8	dppd14	dppd141f	experiment	dpp(d14)	tdtk x 60100	dppd14_02_1wf_orca2_5s_040120,cxd	NA	NA	NA	dpp	1	f	NA	0.654306	NA	70120
dppd141f_03_1wf	96.85	58.6625	0.393827	8.3004	0.11842	0.0304508	0.0761198	0.087969	0.0423	-1811.35	1491.16	0.0150488	0.0100325	0.0200651	0.00745	0.01185	0.0188	0.0267	0.0324	0.05065	0.0543	0.0598	0.07075	0.0869	-0.00169171	-0.000845856	0.125325	0.0134917	4656.7	38652.5	0.297297	20378.9	-48134.5	dppd14	dppd141f	experiment	dpp(d14)	tdtk x 60100	dppd14_03_1wf_orca2_5s_040120,cxd	NA	NA	NA	dpp	1	f	NA	0.654306	NA	70120
dppd141f_04_1wf	85.15	51.35	0.427586	8.77193	0.109742	0.0222914	0.0717422	0.0857361	0.038	-1491.01	1512.07	0.010169	0.010169	0.00508449	0.006	0.0098	0.0162	0.0222	0.0274	0.0468	0.0514	0.0586	0.0715	0.0784	0	0	0.127233	0.00711648	3623.59	31785.9	0.413043	17828.3	-71489	dppd14	dppd141f	experiment	dpp(d14)	tdtk x 60100	dppd14_04_1wf_orca2_5s_040120,cxd	NA	NA	NA	dpp	1	f	NA	0.654306	NA	70120
dppd141f_05_1wf	63.05	40.3	0.355382	8.38207	0.118178	0.0154145	0.0772778	0.0959124	0.0409	-781.091	1041.45	0.0152357	0.0228535	0.017775	0.0057	0.0104	0.0174	0.0242	0.0303	0.0508	0.0568	0.0655	0.078	0.0862	-0.00256908	-0.00342544	0.197053	0.0114901	1865.22	15634.4	0.885714	11494.7	-22606.6	dppd14	dppd141f	experiment	dpp(d14)	tdtk x 60100	dppd14_05_1wf_orca2_5s_040120,cxd	NA	NA	NA	dpp	1	f	NA	0.654306	NA	70120
dppd141f_06_1wf	81.575	46.475	0.424764	8.46457	0.115445	0.0195237	0.0696446	0.0933743	0.0458	-1549.28	1293.29	0.0100681	0.0151022	0.0201363	0.0074	0.012	0.0198	0.0282	0.0347	0.0554	0.0594	0.0653	0.0738	0.08225	-6.93889e-17	0	0.120613	0.00674583	3547.93	30031.7	0.27907	40402.9	-34384.3	dppd14	dppd141f	experiment	dpp(d14)	tdtk x 60100	dppd14_06_1wf_orca2_5s_040120,cxd	NA	NA	NA	dpp	1	f	NA	0.654306	NA	70120
dppd141f_07_1wf	83.2	51.35	0.375	8.59375	0.116329	0.0136858	0.074629	0.0889574	0.0417	-1463.7	1308.26	0.0101453	0.0202905	0.0202905	0.0075	0.0126	0.0201	0.0277	0.0333	0.0501	0.0541	0.0601	0.0701	0.077	0	0	0.183376	0.00978516	3365.76	28924.5	0.5	32343.8	-39630.1	dppd14	dppd141f	experiment	dpp(d14)	tdtk x 60100	dppd14_07_1wf_orca2_5s_040120,cxd	NA	NA	NA	dpp	1	f	NA	0.654306	NA	70120
dppd141f_08_1wf	81.9	50.05	0.384724	7.2549	0.132968	0.0221613	0.079068	0.103988	0.0539	-1414.4	1015.07	0.0176919	0.0227467	0.0176919	0.0082	0.015	0.0251	0.0352	0.0428	0.0625	0.0668	0.0725	0.0824	0.0886	0.000852359	0.00511415	0.178069	0.0112678	3299.72	23939.2	0.555556	20638.4	-33754.3	dppd14	dppd141f	experiment	dpp(d14)	tdtk x 60100	dppd14_08_1wf_orca2_5s_040120,cxd	NA	NA	NA	dpp	1	f	NA	0.654306	NA	70120
dppd141f_09_1wf	51.675	35.75	0.308016	7.46562	0.129254	0.0425179	0.0895044	0.0850358	0.03975	-578.317	736.725	0.0151289	0.0176504	0.0226933	0.0047	0.00865	0.0152	0.02295	0.02995	0.0496	0.0558	0.064	0.07345	0.08305	-0.00170072	-0.000850358	0.173252	0.0100076	1094.54	8171.45	0.315789	60902.1	-33399.2	dppd14	dppd141f	experiment	dpp(d14)	tdtk x 60100	dppd14_09_1wf_orca2_5s_040120,cxd	NA	NA	NA	dpp	1	f	NA	0.654306	NA	70120
dppd141f_10_1wf	63.7	40.3	0.357143	7.29783	0.130416	0.0338743	0.0892159	0.0914605	0.0422	-834.964	1130.57	0.0100444	0.0225999	0.0301332	0.0058	0.01	0.0162	0.0236	0.031	0.0516	0.0566	0.0648	0.0754	0.0862	-0.00338743	-0.00338743	0.206873	0.0081543	1911.34	13948.7	0.333333	37394.2	-53670	dppd14	dppd141f	experiment	dpp(d14)	tdtk x 60100	dppd14_10_1wf_orca2_5s_040120,cxd	NA	NA	NA	dpp	1	f	NA	0.654306	NA	70120
dppd141f_11_1wf	84.5	48.5875	0.420987	7.90514	0.121803	0.0219923	0.0839533	0.0964276	0.03785	-1284.76	1556.12	0.018811	0.0150488	0.0275895	0.0058	0.0097	0.0159	0.0229	0.02885	0.0474	0.0528	0.06115	0.0744	0.0887	-0.00169171	2.20657e-15	0.120482	0.0124538	3755.12	29684.8	0.190476	64715.6	-40089.1	dppd14	dppd141f	experiment	dpp(d14)	tdtk x 60100	dppd14_11_1wf_orca2_5s_040120,cxd	NA	NA	NA	dpp	1	f	NA	0.654306	NA	70120
dppd141f_12_1wf	70.85	43.225	0.371079	8.6444	0.108718	0.023782	0.0688678	0.0866345	0.03985	-1217.5	1213.15	0.0151111	0.0151111	0.0201481	0.0064	0.0112	0.0177	0.02435	0.0298	0.04905	0.0535	0.05955	0.06945	0.0748	0.00339743	0.00339743	0.19955	0.0088956	2482.59	21460.5	0.512821	38262	-27484.6	dppd14	dppd141f	experiment	dpp(d14)	tdtk x 60100	dppd14_12_1wf_orca2_5s_040120,cxd	NA	NA	NA	dpp	1	f	NA	0.654306	NA	70120
dppd141f_13_1wf	91.65	52.1625	0.42506	8.17121	0.120171	0.0257508	0.0778206	0.0918446	0.04235	-1742.14	1642.98	0.0139987	0.0101809	0.0203617	0.0068	0.01155	0.0191	0.02635	0.0322	0.0505	0.05475	0.06075	0.07115	0.0825	0.00171672	-0.000858361	0.112644	0.00926625	4467.89	36508.1	0.380952	21455.6	-41978.4	dppd14	dppd141f	experiment	dpp(d14)	tdtk x 60100	dppd14_13_1wf_orca2_5s_040120,cxd	NA	NA	NA	dpp	1	f	NA	0.654306	NA	70120
dppd141f_14_1wf	90.025	53.625	0.403065	7.9922	0.119034	0.021409	0.0772341	0.0924869	0.0418	-2031.78	1631.44	0.0126964	0.0165053	0.0215839	0.008	0.0126	0.0188	0.0258	0.0312	0.0516	0.0557	0.0613	0.0698	0.0795	-0.00171272	-0.00171272	0.18118	0.00689409	4104.75	32806	0.175	22689.6	-14947.7	dppd14	dppd141f	experiment	dpp(d14)	tdtk x 60100	dppd14_14_1wf_orca2_5s_040120,cxd	NA	NA	NA	dpp	1	f	NA	0.654306	NA	70120
dppd141f_15_1wf	65.325	42.9	0.340368	7.87402	0.11877	0.0288441	0.0784233	0.0873808	0.03865	-1042.21	1107.41	0.0150933	0.0150933	0.0226399	0.00605	0.01095	0.01695	0.0235	0.0285	0.0498	0.05515	0.0625	0.0712	0.07645	0.00339343	0.00254507	0.198953	0.00793191	2054.03	16054.6	0.390244	33425.2	-43587.1	dppd14	dppd141f	experiment	dpp(d14)	tdtk x 60100	dppd14_15_1wf_orca2_5s_040120,cxd	NA	NA	NA	dpp	1	f	NA	0.654306	NA	70120
dppd141f_16_1wf	80.925	52.8125	0.337553	8.17121	0.116737	0.0257508	0.0741871	0.0918447	0.04255	-1212.51	1257.59	0.0139987	0.0101809	0.0178165	0.00665	0.01175	0.018	0.02555	0.03185	0.0507	0.05645	0.06365	0.07325	0.08025	0.00171672	0.00257508	0.145765	0.0103782	2949.44	24100.4	0.761905	37345.9	-53717.9	dppd14	dppd141f	experiment	dpp(d14)	tdtk x 60100	dppd14_16_1wf_orca2_5s_040120,cxd	NA	NA	NA	dpp	1	f	NA	0.654306	NA	70120
dppd141f_17_1wf	77.35	50.7	0.344538	8.38207	0.113106	0.0205647	0.0723056	0.0925409	0.0408	-1032.03	1287.83	0.0152446	0.0152446	0.0177853	0.0078	0.013	0.0188	0.0256	0.0314	0.0508	0.0566	0.0638	0.072	0.0792	0.00171372	1.02141e-14	0.180612	0.00652344	2680.2	22465.6	0.111111	48399.2	-22254.8	dppd14	dppd141f	experiment	dpp(d14)	tdtk x 60100	dppd14_17_1wf_orca2_5s_040120,cxd	NA	NA	NA	dpp	1	f	NA	0.654306	NA	70120
dppd141f_18_1wf	98.15	53.3	0.444023	7.9922	0.121674	0.0239921	0.0781742	0.0908272	0.0433	-2391.39	2231.81	0.0127038	0.0114334	0.0228669	0.0079	0.0123	0.0195	0.0285	0.0351	0.0513	0.0553	0.0617	0.069	0.07995	-0.00342744	-0.00342744	0.129531	0.00711648	5039.85	40279.5	0.214286	46188.9	-44572.5	dppd14	dppd141f	experiment	dpp(d14)	tdtk x 60100	dppd14_18_1wf_orca2_5s_040120,cxd	NA	NA	NA	dpp	1	f	NA	0.654306	NA	70120
tdtkattp2_01_1wf	86.125	58.825	0.306529	8.55615	0.112367	0.0243462	0.0677173	0.0889574	0.04465	-1247.3	1156.92	0.00971809	0.0111064	0.0194362	0.0071	0.01175	0.0183	0.02535	0.0319	0.05565	0.0606	0.06655	0.0733	0.07975	2.77556e-17	1.249e-16	0.136248	0.00526323	3277.16	28039.9	0.311111	62289.3	-52431.9	tdtkattp2	tdtkattp21f	control	60100	tdtkattp2 x 60100	tdtkattp2_01_1wf_orca2_5s_070320,cxd	NA	NA	NA		1	f	NA	0.654306	NA	70320
tdtkattp2_02_1wf	89.7	61.75	0.366667	9.44742	0.104988	0.0187479	0.0623882	0.0862403	0.0426	-2158.73	1677.92	0.0111182	0.0111182	0.0111182	0.0084	0.013	0.0192	0.0276	0.0326	0.0518	0.0558	0.0608	0.0666	0.0734	-1.11022e-16	0	0.118286	0.0051891	3583.77	33857.4	0.384615	56589.7	-109480	tdtkattp2	tdtkattp21f	control	60100	tdtkattp2 x 60100	tdtkattp2_02_1wf_orca2_5s_070320,cxd	NA	NA	NA		1	f	NA	0.654306	NA	70320
tdtkattp2_03_1wf	94.25	58.5	0.375072	9.36364	0.102803	0.016522	0.0585033	0.0844455	0.0443	-2100.31	1555.22	0.00544343	0.0108869	0.0163303	0.0087	0.0134	0.02025	0.02905	0.0353	0.0513	0.05485	0.0598	0.06575	0.0722	4.30211e-16	4.16334e-16	0.10729	0.00385476	4290.57	40160	0.442308	79308.4	-93016	tdtkattp2	tdtkattp21f	control	60100	tdtkattp2 x 60100	tdtkattp2_03_1wf_orca2_5s_070320,cxd	NA	NA	NA		1	f	NA	0.654306	NA	70320
tdtkattp2_04_1wf	88.4	68.9	0.199248	8.7344	0.10868	0.0187379	0.0712797	0.0861943	0.0374	-938.021	1071.89	0.0111123	0.0111123	0.0166685	0.0054	0.0096	0.0142	0.0196	0.0248	0.0536	0.0586	0.0652	0.0722	0.0792	0	0	0.160461	0.00459606	2267.07	19801.5	0.64	35060.3	-54915.5	tdtkattp2	tdtkattp21f	control	60100	tdtkattp2 x 60100	tdtkattp2_04_1wf_orca2_5s_070320,cxd	NA	NA	NA		1	f	NA	0.654306	NA	70320
tdtkattp2_05_1wf	98.8	69.55	0.291137	8.18505	0.117299	0.0225215	0.0711762	0.0919627	0.048	-1300.81	1298.76	0.0111301	0.0180864	0.0194777	0.0087	0.0137	0.0198	0.02805	0.03585	0.05675	0.0611	0.06715	0.07425	0.0802	5.10703e-15	2.66454e-15	0.168242	0.0044478	3867.16	31315.1	0.588235	95438.9	-110569	tdtkattp2	tdtkattp21f	control	60100	tdtkattp2 x 60100	tdtkattp2_05_1wf_orca2_5s_070320,cxd	NA	NA	NA		1	f	NA	0.654306	NA	70320
tdtkattp2_06_1wf	89.05	53.95	0.373832	9.07473	0.108796	0.0187579	0.0667958	0.0862863	0.042	-1776.77	1562.74	0.00556209	0.0166863	0.0166863	0.0084	0.0126	0.019	0.0263	0.0328	0.0524	0.0566	0.0616	0.0676	0.0742	0	0	0.164271	0.00355824	3942.15	35072.5	0.46	34546.2	-65556.3	tdtkattp2	tdtkattp21f	control	60100	tdtkattp2 x 60100	tdtkattp2_06_1wf_orca2_5s_070320,cxd	NA	NA	NA		1	f	NA	0.654306	NA	70320
tdtkattp2_07_1wf	103.35	65.65	0.36478	8.91266	0.10868	0.026233	0.0674797	0.0786991	0.0412	-1966.87	1623.45	0.00277808	0.00555616	0.00555616	0.0065	0.0109	0.017	0.0235	0.0292	0.0515	0.056	0.0609	0.067	0.0722	0	0	0.0661289	0.0014826	5004.01	44599	0.557692	82186.1	-132287	tdtkattp2	tdtkattp21f	control	60100	tdtkattp2 x 60100	tdtkattp2_07_1wf_orca2_5s_070320,cxd	NA	NA	NA		1	f	NA	0.654306	NA	70320
tdtkattp2_08_1wf	98.15	55.575	0.426667	9.07473	0.108854	0.0168911	0.0664538	0.0863323	0.0424	-2480.38	2400.58	0.00834759	0.0125214	0.0139126	0.0089	0.013	0.0181	0.025	0.0311	0.0523	0.0567	0.0614	0.0675	0.0743	0	0	0.119202	0.00281694	5138.56	46631.1	0.102041	54439.5	-52128.4	tdtkattp2	tdtkattp21f	control	60100	tdtkattp2 x 60100	tdtkattp2_08_1wf_orca2_5s_070320,cxd	NA	NA	NA		1	f	NA	0.654306	NA	70320
tdtkattp2_09_1wf	89.7	57.85	0.350365	9.09091	0.10868	0.0224855	0.0658797	0.0824467	0.0428	-1700.44	1309.34	0.00555616	0.0111123	0.0111123	0.0076	0.0126	0.0192	0.0258	0.0314	0.0528	0.0562	0.0606	0.0684	0.0753	9.4369e-16	9.99201e-16	0.128563	0.00489258	3690.95	33554.1	0.08	113233	-97877.5	tdtkattp2	tdtkattp21f	control	60100	tdtkattp2 x 60100	tdtkattp2_09_1wf_orca2_5s_070320,cxd	NA	NA	NA		1	f	NA	0.654306	NA	70320
tdtkattp2_10_1wf	76.05	48.75	0.378641	8.3779	0.114362	0.0187479	0.0707621	0.0899899	0.0432	-1279.86	1254.04	0.0111182	0.0138978	0.0222365	0.007	0.0116	0.0164	0.0242	0.031	0.0526	0.0566	0.063	0.0694	0.0754	9.99201e-15	1.02141e-14	0.171456	0.0059304	2675.88	22418.3	0.395833	83869.3	-76357.3	tdtkattp2	tdtkattp21f	control	60100	tdtkattp2 x 60100	tdtkattp2_10_1wf_orca2_5s_070320,cxd	NA	NA	NA		1	f	NA	0.654306	NA	70320
tdtkattp2_11_1wf	96.2	59.475	0.380846	8.18505	0.116361	0.0225215	0.074461	0.0938395	0.0419	-1626.27	1734.08	0.0111301	0.0139126	0.0222602	0.0093	0.01415	0.0198	0.02645	0.03145	0.05325	0.0587	0.0654	0.07245	0.07965	0.00187679	0.00281519	0.155111	0.00244629	4486.35	37085.6	0.531915	61665.5	-125298	tdtkattp2	tdtkattp21f	control	60100	tdtkattp2 x 60100	tdtkattp2_11_1wf_orca2_5s_070320,cxd	NA	NA	NA		1	f	NA	0.654306	NA	70320
tdtkattp2_12_1wf	93.925	68.575	0.263318	9.46429	0.103773	0.0196328	0.0652732	0.0822706	0.0385	-1288.87	1362.66	0.0110886	0.0138607	0.0207911	0.0068	0.011	0.0166	0.0223	0.0275	0.0507	0.0564	0.062	0.0676	0.07195	4.64906e-16	4.85723e-16	0.140034	0.00563388	3283.13	31072.5	0.811321	64690	-88213.6	tdtkattp2	tdtkattp21f	control	60100	tdtkattp2 x 60100	tdtkattp2_12_1wf_orca2_5s_070320,cxd	NA	NA	NA		1	f	NA	0.654306	NA	70320
tdtkattp2_13_1wf	81.9	52.65	0.346774	9.09091	0.108738	0.0206227	0.0659378	0.0862403	0.0408	-1449.23	1359.63	0.00555912	0.0111182	0.0138978	0.0074	0.0129	0.0191	0.0251	0.031	0.0494	0.0534	0.0584	0.0662	0.0757	0	0	0.106102	0.00385476	3091	28100	0.0576923	156351	-96471.8	tdtkattp2	tdtkattp21f	control	60100	tdtkattp2 x 60100	tdtkattp2_13_1wf_orca2_5s_070320,cxd	NA	NA	NA		1	f	NA	0.654306	NA	70320
tdtkattp2_14_1wf	91	64.025	0.29492	8.70736	0.111707	0.0223414	0.068407	0.085642	0.0433	-1619.09	1268.63	0.0220822	0.0165617	0.0248425	0.00695	0.0124	0.01955	0.0277	0.0347	0.0496	0.05275	0.05855	0.06915	0.0781	-0.00186178	-0.000930892	0.222097	0.0177912	3283.3	28543.3	0.361702	59575.2	-147676	tdtkattp2	tdtkattp21f	control	60100	tdtkattp2 x 60100	tdtkattp2_14_1wf_orca2_5s_070320,cxd	NA	NA	NA		1	f	NA	0.654306	NA	70320
tdtkattp2_15_1wf	99.45	63.7	0.357616	8.3779	0.114301	0.0206117	0.0693011	0.0899419	0.045	-1553.63	1498.27	0.00555616	0.0138904	0.0138904	0.0094	0.0146	0.0206	0.0288	0.0352	0.0532	0.0578	0.064	0.071	0.0782	-4.66294e-15	-4.44089e-16	0.168308	0.00415128	4580.92	38378.5	0.574468	51339.1	-104834	tdtkattp2	tdtkattp21f	control	60100	tdtkattp2 x 60100	tdtkattp2_15_1wf_orca2_5s_070320,cxd	NA	NA	NA		1	f	NA	0.654306	NA	70320
tdtkattp2_16_1wf	92.3	55.9	0.401361	8.7344	0.112427	0.026233	0.0676273	0.0861943	0.0434	-1784.01	1734.45	0.00555616	0.00555616	0.00833424	0.0082	0.0126	0.019	0.0262	0.0324	0.0522	0.0574	0.0634	0.07	0.0764	0	0	0.111386	0.00266868	4405.05	38475.5	0.405405	27773.4	-102581	tdtkattp2	tdtkattp21f	control	60100	tdtkattp2 x 60100	tdtkattp2_16_1wf_orca2_5s_070320,cxd	NA	NA	NA		1	f	NA	0.654306	NA	70320
tdtkattp2_17_1wf	94.9	61.75	0.349315	8.18505	0.120051	0.0262611	0.0814505	0.0919137	0.0386	-1408.68	1706.24	0.00834314	0.00556209	0.0111242	0.0076	0.012	0.0179	0.0231	0.0281	0.0512	0.0587	0.066	0.0729	0.0801	-8.88178e-16	-4.996e-16	0.130796	0.00326172	4078.53	33383	0.5	62394	-120740	tdtkattp2	tdtkattp21f	control	60100	tdtkattp2 x 60100	tdtkattp2_17_1wf_orca2_5s_070320,cxd	NA	NA	NA		1	f	NA	0.654306	NA	70320
tdtkattp2_18_1wf	74.425	46.15	0.367898	8.19964	0.118112	0.0206227	0.0744617	0.0899899	0.04365	-1309.57	1356.67	0.0111182	0.0166774	0.0194569	0.0082	0.01305	0.01885	0.0259	0.0322	0.0533	0.05855	0.0649	0.072	0.07935	-0.00187479	-0.00187479	0.155892	0.00622692	2787.54	22856.9	0.526316	52707.3	-43712.2	tdtkattp2	tdtkattp21f	control	60100	tdtkattp2 x 60100	tdtkattp2_18_1wf_orca2_5s_070320,cxd	NA	NA	NA		1	f	NA	0.654306	NA	70320
tdtkattp2_19_1wf	99.775	61.1	0.38566	8.44037	0.114771	0.0200394	0.0728213	0.0910883	0.04195	-2067.09	1762.65	0.0135048	0.0162057	0.0162057	0.01115	0.0171	0.02395	0.02985	0.03455	0.0481	0.05225	0.05745	0.06485	0.0744	-4.996e-15	-4.82947e-15	0.149537	0.0044478	4888.7	41262.4	0.217391	43840.1	-73912.8	tdtkattp2	tdtkattp21f	control	60100	tdtkattp2 x 60100	tdtkattp2_19_1wf_orca2_5s_070320,cxd	NA	NA	NA		1	f	NA	0.654306	NA	70320
tdtkattp2_20_1wf	87.1	58.5	0.335821	8.91266	0.104988	0.0224975	0.0617882	0.0862403	0.0433	-1740.46	1248.14	0.0111182	0.0111182	0.0111182	0.0082	0.0124	0.0189	0.0265	0.033	0.0508	0.0543	0.0589	0.0649	0.0722	0	0	0.157683	0.00385476	3359.37	29940.9	0.571429	56929.3	-70304.5	tdtkattp2	tdtkattp21f	control	60100	tdtkattp2 x 60100	tdtkattp2_20_1wf_orca2_5s_070320,cxd	NA	NA	NA		1	f	NA	0.654306	NA	70320
tdtkattp21f_01_1wf	73.45	45.5	0.396396	8.24053	0.118464	0.0299909	0.0782639	0.0899726	0.0406	-1394.12	1646	0.0177858	0.0133393	0.0222322	0.0071	0.012	0.0178	0.0244	0.0304	0.0504	0.0554	0.0618	0.0704	0.0796	0	0	0.156511	0.00830256	2747.56	22641.3	0.0857143	91903	-63716.1	tdtkattp2	tdtkattp21f	control	60100	tdtkattp2 x 60100	tdtkattp2_01_1wf_orca2_5s_040120,cxd	NA	NA	NA		1	f	NA	0.654306	NA	70120
tdtkattp21f_02_1wf	92.625	53.95	0.417537	8.24053	0.113966	0.0277417	0.068366	0.0854745	0.0456	-1974.01	1505.4	0.00444647	0.0133394	0.0133394	0.008	0.0131	0.0199	0.0283	0.0352	0.0539	0.0581	0.0634	0.069	0.0757	1.63064e-16	5.55112e-17	0.198323	0.00355824	4452.34	36689.7	0.5	26609.5	-56584.3	tdtkattp2	tdtkattp21f	control	60100	tdtkattp2 x 60100	tdtkattp2_02_1wf_orca2_5s_040120,cxd	NA	NA	NA		1	f	NA	0.654306	NA	70120
tdtkattp21f_03_1wf	80.6	50.7	0.362903	9.1314	0.101969	0.0134959	0.0591693	0.0809756	0.042	-1480.12	1242.24	0.00889292	0.0177858	0.0200091	0.0072	0.0116	0.018	0.0256	0.0322	0.051	0.056	0.061	0.0672	0.0724	-5.55112e-17	0	0.250044	0.00622692	3083.37	28155.5	0.714286	28845.8	-28608	tdtkattp2	tdtkattp21f	control	60100	tdtkattp2 x 60100	tdtkattp2_03_1wf_orca2_5s_040120,cxd	NA	NA	NA		1	f	NA	0.654306	NA	70120
tdtkattp21f_04_1wf	86.775	57.2	0.321735	8.68597	0.113216	0.029991	0.0764159	0.0869738	0.0368	-1422.65	1339.29	0.0177858	0.0166742	0.0300136	0.0054	0.0097	0.0155	0.0226	0.0278	0.047	0.05345	0.0605	0.06845	0.0732	-0.000749774	-5.10703e-15	0.196653	0.0116384	3373.89	29305.5	0.472222	22997.5	-28989.4	tdtkattp2	tdtkattp21f	control	60100	tdtkattp2 x 60100	tdtkattp2_04_1wf_orca2_5s_040120,cxd	NA	NA	NA		1	f	NA	0.654306	NA	70120
tdtkattp21f_05_1wf	72.8	46.8	0.357143	9.79955	0.101969	0.0239928	0.0603693	0.0779765	0.0416	-1448.16	1196.95	0.00444646	0.00444646	0.00889292	0.0049	0.0083	0.0148	0.0234	0.0298	0.0519	0.056	0.0606	0.0661	0.0705	4.44089e-16	4.44089e-16	0.0807523	0.00385476	2442.27	23933.2	0.560976	85795.7	-102353	tdtkattp2	tdtkattp21f	control	60100	tdtkattp2 x 60100	tdtkattp2_05_1wf_orca2_5s_040120,cxd	NA	NA	NA		1	f	NA	0.654306	NA	70120
tdtkattp21f_06_1wf	98.15	70.2	0.284768	8.90869	0.107967	0.0239928	0.0643675	0.0809756	0.0426	-1636.33	1262.46	0.00889292	0.00889292	0.00889292	0.0049	0.009	0.0158	0.0238	0.031	0.0506	0.0541	0.059	0.0674	0.0776	-4.44089e-16	-2.22045e-16	0.0541412	0.00533736	4009.1	35715.8	0.0243902	28825.3	-42906.3	tdtkattp2	tdtkattp21f	control	60100	tdtkattp2 x 60100	tdtkattp2_06_1wf_orca2_5s_040120,cxd	NA	NA	NA		1	f	NA	0.654306	NA	70120
tdtkattp21f_07_1wf	95.875	60.45	0.371622	9.79955	0.095971	0.0149955	0.056871	0.079476	0.0391	-1960.44	1679.67	0.0111161	0.00889292	0.0133394	0.0088	0.0132	0.0192	0.0252	0.0304	0.0464	0.0506	0.0556	0.061	0.0673	-9.99201e-15	-4.996e-15	0.134119	0.0029652	4349.39	42622.1	0.512195	44583.3	-42226.3	tdtkattp2	tdtkattp21f	control	60100	tdtkattp2 x 60100	tdtkattp2_07_1wf_orca2_5s_040120,cxd	NA	NA	NA		1	f	NA	0.654306	NA	70120
tdtkattp21f_08_1wf	102.375	70.2	0.318016	8.90869	0.107967	0.0224931	0.0660671	0.085474	0.0419	-1874.74	1739.28	0.00889289	0.0111161	0.0133393	0.00705	0.0126	0.0195	0.02555	0.0315	0.05135	0.0561	0.0621	0.06855	0.0751	2.22045e-16	3.60822e-16	0.147367	0.00474432	4338.19	38647.6	0.7	62042.2	-73642.2	tdtkattp2	tdtkattp21f	control	60100	tdtkattp2 x 60100	tdtkattp2_08_1wf_orca2_5s_040120,cxd	NA	NA	NA		1	f	NA	0.654306	NA	70120
tdtkattp21f_09_1wf	89.05	59.15	0.345324	8.01782	0.122963	0.029991	0.0795631	0.089973	0.0444	-1474.98	1444.88	0.0111162	0.0222323	0.0222323	0.0065	0.0115	0.0174	0.0237	0.032	0.0539	0.0591	0.0653	0.0734	0.0826	-4.44089e-16	-0.00149955	0.15985	0.00474432	3358.13	26924.8	0.457143	31608.8	-53536.7	tdtkattp2	tdtkattp21f	control	60100	tdtkattp2 x 60100	tdtkattp2_09_1wf_orca2_5s_040120,cxd	NA	NA	NA		1	f	NA	0.654306	NA	70120
tdtkattp21f_10_1wf	92.95	55.9	0.402731	8.90869	0.107967	0.0269918	0.0669674	0.0824751	0.041	-1956.01	1641.75	0.0111161	0.00444646	0.0133394	0.0064	0.0108	0.017	0.0243	0.0303	0.0485	0.0532	0.0586	0.0641	0.0694	0	0	0.10391	0.00711648	4388.13	39092.5	0.425	58028.6	-62589.4	tdtkattp2	tdtkattp21f	control	60100	tdtkattp2 x 60100	tdtkattp2_10_1wf_orca2_5s_040120,cxd	NA	NA	NA		1	f	NA	0.654306	NA	70120
tdtkattp21f_11_1wf	87.1	54.6	0.373134	10.0223	0.095971	0.0179946	0.056571	0.0779765	0.0394	-1560.47	1666.43	0.00444646	0.00889292	0.0111161	0.0066	0.0104	0.016	0.0226	0.0288	0.0492	0.054	0.0602	0.0661	0.0708	4.30211e-16	4.44089e-16	0.133008	0.00326172	3616.95	36250.1	0.4	58480.6	-41441.2	tdtkattp2	tdtkattp21f	control	60100	tdtkattp2 x 60100	tdtkattp2_11_1wf_orca2_5s_040120,cxd	NA	NA	NA		1	f	NA	0.654306	NA	70120
tdtkattp21f_12_1wf	91.65	62.4	0.319149	10.0223	0.0974706	0.0239928	0.0582706	0.0749774	0.0392	-1449.7	1271.49	0.00444646	0.00666969	0.00889292	0.0054	0.0096	0.0162	0.0236	0.0292	0.0472	0.0516	0.0572	0.063	0.0682	0	0	0.0772055	0.00415128	3538.97	35468.6	0.488372	80738.9	-87594.1	tdtkattp2	tdtkattp21f	control	60100	tdtkattp2 x 60100	tdtkattp2_12_1wf_orca2_5s_040120,cxd	NA	NA	NA		1	f	NA	0.654306	NA	70120
tdtkattp21f_13_1wf	95.55	61.1	0.360544	9.57684	0.10197	0.0239929	0.0645698	0.0779769	0.0374	-1663.28	1502	0.00444648	0.00444648	0.00889296	0.0064	0.011	0.017	0.0238	0.0284	0.047	0.0522	0.058	0.0632	0.0692	0.00149956	0.00299911	0.124202	0.00266868	4238.47	40591.2	0.488372	66034.8	-50290	tdtkattp2	tdtkattp21f	control	60100	tdtkattp2 x 60100	tdtkattp2_13_1wf_orca2_5s_040120,cxd	NA	NA	NA		1	f	NA	0.654306	NA	70120
tdtkattp21f_14_1wf	102.375	69.55	0.320452	9.1314	0.105718	0.0209937	0.0612182	0.0854743	0.0445	-1834.29	1318.89	0.0133394	0.0166742	0.0166742	0.0072	0.0123	0.0195	0.028	0.0348	0.0523	0.0557	0.061	0.0666	0.07105	-3.69149e-15	-2.498e-15	0.135222	0.00778365	4431.77	40468.2	0.463415	42954.5	-58361.2	tdtkattp2	tdtkattp21f	control	60100	tdtkattp2 x 60100	tdtkattp2_14_1wf_orca2_5s_040120,cxd	NA	NA	NA		1	f	NA	0.654306	NA	70120
tdtkattp21f_15_1wf	95.55	65	0.320824	8.46325	0.113966	0.026992	0.0706666	0.0869742	0.0421	-1668.26	1377.38	0.00889296	0.0177859	0.0155627	0.00735	0.01235	0.0188	0.02555	0.0311	0.0519	0.05575	0.06115	0.0673	0.0746	-1.38778e-16	-0.000749777	0.150027	0.00340998	3963.88	33547.3	0.538462	56510	-83673.7	tdtkattp2	tdtkattp21f	control	60100	tdtkattp2 x 60100	tdtkattp2_15_1wf_orca2_5s_040120,cxd	NA	NA	NA		1	f	NA	0.654306	NA	70120
tdtkattp21f_16_1wf	90.35	55.575	0.359712	9.35412	0.101969	0.0149955	0.0611692	0.0839747	0.0408	-1656.45	1321.03	0.0133394	0.0133394	0.0222323	0.0066	0.0121	0.0199	0.028	0.0345	0.0491	0.0529	0.0593	0.0651	0.0694	0	0	0.169404	0.00948864	3985.54	37281.2	0.738095	56605	-118507	tdtkattp2	tdtkattp21f	control	60100	tdtkattp2 x 60100	tdtkattp2_16_1wf_orca2_5s_040120,cxd	NA	NA	NA		1	f	NA	0.654306	NA	70120
tdtkattp21f_17_1wf	92.4625	62.8875	0.311977	8.46325	0.113966	0.0284915	0.073566	0.0869741	0.0404	-1354.57	1294.68	0.014451	0.0155627	0.0155627	0.00705	0.0117	0.01825	0.02535	0.0307	0.05065	0.05585	0.06235	0.06905	0.0729	-0.00149955	-0.000749776	0.165137	0.00726474	3616.95	30611.2	0.388889	28711.2	-71851.1	tdtkattp2	tdtkattp21f	control	60100	tdtkattp2 x 60100	tdtkattp2_17_1wf_orca2_5s_040120,cxd	NA	NA	NA		1	f	NA	0.654306	NA	70120
tdtkattp21f_18_1wf	92.95	64.35	0.289855	9.1314	0.107967	0.0269919	0.0647674	0.0809756	0.0432	-1723.28	1178.81	0.0133394	0.00889292	0.0155626	0.006	0.0104	0.0174	0.0254	0.0328	0.0534	0.0576	0.0618	0.0658	0.069	5.55112e-17	0	0.164081	0.00948864	3533.33	32264.3	0.0882353	NA	-8820.46	tdtkattp2	tdtkattp21f	control	60100	tdtkattp2 x 60100	tdtkattp2_18_1wf_orca2_5s_040120,cxd	NA	NA	NA		1	f	NA	0.654306	NA	70120
tdtkattp21f_19_1wf	85.15	54.6	0.358779	9.57684	0.104968	0.0254923	0.0609683	0.0779765	0.044	-1754.02	1295.35	0.00444646	0.00889292	0.00666969	0.006	0.011	0.0174	0.0256	0.0334	0.0522	0.0558	0.0608	0.0662	0.0708	0	0	0.144608	0.00237216	3353.15	32112.6	0.515152	57490.7	-43008.2	tdtkattp2	tdtkattp21f	control	60100	tdtkattp2 x 60100	tdtkattp2_19_1wf_orca2_5s_040120,cxd	NA	NA	NA		1	f	NA	0.654306	NA	70120
tdtkattp21f_20_1wf	107.9	71.5	0.337349	9.1314	0.104968	0.0194941	0.0629684	0.0839747	0.042	-1897.73	1532.98	0.00889292	0.00889292	0.0111161	0.0082	0.0128	0.0198	0.0276	0.0336	0.049	0.053	0.0586	0.0658	0.0729	-5.55112e-17	0	0.0952674	0.00252042	5128.78	46832.9	0.714286	29402.4	-101187	tdtkattp2	tdtkattp21f	control	60100	tdtkattp2 x 60100	tdtkattp2_20_1wf_orca2_5s_040120,cxd	NA	NA	NA		1	f	NA	0.654306	NA	70120
[truncated: 5 more columns]

## Sheet: line_info_GWASpositivegenes
GWAS.control.type	line.ID	gene	Flybase.ID	Cross	genotype.background	background.control
control				UASGFPVal10HandGal4	TRiP	UASGFPVal10HandGal4
control				controlTrIPSDxHandGal4	TRiP	controlTrIPSDxHandGal4
control	VDRC 60000			GDControlxHandGal4	GD	GDControlxHandGal4
control	VDRC 60100			KKControlxHandGal4	KK	KKControlxHandGal4
positive	63569	CG45186	FBgn0266696	CG45186RnaiHandGal4	TRiP	UASGFPVal10HandGal4
positive	41914	Fur1	FBgn0004509	Fur1RnaiHandGal4	TRiP	UASGFPVal10HandGal4
positive	55241	lap	FBgn0086372	lapRnaiHandGal4	TRiP	UASGFPVal10HandGal4
positive	64966	CG32264	FBgn0052264	CG32264RNAiHandGal4	TRiP	UASGFPVal10HandGal4
positive	42918	Mur29B	FBgn0051901	Mur29BRNAiHandGal4	TRiP	UASGFPVal10HandGal4
positive	29380	MESK2	FBgn0043070	MESK2RnaiHandGal4	TRiP	UASGFPVal10HandGal4
positive	34993	Ubx	FBgn0003944	UbxRnaiHandGal4	TRiP	UASGFPVal10HandGal4
positive	42517	bchs	FBgn0043362	bchsRnaiHandGal4	TRiP	UASGFPVal10HandGal4
positive	51723	sdc	FBgn0010415	SdcRnaiHandGal4	TRiP	UASGFPVal10HandGal4
positive	VDRC 28070	tna	FBgn0026160	tnaxHandGal4	GD	GDControlxHandGal4
positive	VDRC 13829	CG7512	FBgn0036168	CG7512xHandGal4	GD	GDControlxHandGal4
positive	VDRC 101084	CG7627	FBgn0032026	CG7627xHandGal4	KK	KKControlxHandGal4
positive	VDRC 110277	btI	FBgn0285896	btlxHandGal4	KK	KKControlxHandGal4
positive	VDRC 101125	fog	FBgn0000719	fogxHandGal4	KK	KKControlxHandGal4
positive	VDRC 34885	CG33158	FBgn0053158	CG33158xHandGal4	GD	GDControlxHandGal4
positive	VDRC 12610	jumu	FBgn0015396	jumuxHandGal4	GD	GDControlxHandGal4
positive	VDRC 109585	kirre	FBgn0028369	KirrexHandGal4	KK	KKControlxHandGal4
positive	VDRC 108747	Lmx1a	FBgn0052105	Lmx1axHandGal4	KK	KKControlxHandGal4
positive	VDRC 108769	mamo	FBgn0267033	mamoxHandGal4	KK	KKControlxHandGal4
positive	VDRC 104033	mthl3	FBgn0028956	mthl3xHandGal4	KK	KKControlxHandGal4
positive	VDRC 100171	Muc18B	FBgn0031000	Muc18BxHandGal4	KK	KKControlxHandGal4
positive	VDRC 106103	Poxm	FBgn0003129	PoxmxHandGal4	KK	KKControlxHandGal4
positive	VDRC 100429	Rdl	FBgn0004244	RdlxHandGal4	KK	KKControlxHandGal4
positive	VDRC 107294	rdx	FBgn0264493	rdxxHandGal4	GD	GDControlxHandGal4
positive	VDRC 104600	RunxB	FBgn0259162	RunxBxHandGal4	KK	KKControlxHandGal4
positive	VDRC 24578	shakB	FBgn0085387	ShakBxHandGal4	GD	GDControlxHandGal4
positive	VDRC 27919	Snoo	FBgn0085450	SnooxHandGal4	KK	KKControlxHandGal4
positive	VDRC 10214	CG18208	FBgn0038653	CG18208xHandGal4	GD	GDControlxHandGal4
positive	VDRC 110347	CG8112	FBgn0037612	CG8112xHandGal4	KK	KKControlxHandGal4
Positive	39025	put	FBgn0003169	putxHandGal4	TRiP	UASGFPVal10HandGal4
Positive	51460	mbc	FBgn0015513	mbcxHandGal4	TRiP	UASGFPVal10HandGal4
Positive	39059	vav	FBgn0040068	vavxHandGal4	TRiP	UASGFPVal10HandGal4
Positive	29519	Sema2a	FBgn0011260	sema2axHandGal4	TRiP	UASGFPVal10HandGal4
Positive	VDRC 107320	sdc	FBgn0010415	sdcRnaiHandGal4	KK	KKControlxHandGal4
Positive	VDRC 101497	sd	FBgn0003345	sdRnaiHandGal4	KK	KKControlxHandGal4
Positive	VDRC 105853	sog	FBgn0003463	sogRnaiHandGal4	KK	KKControlxHandGal4
Positive	VDRC 109521	srp	FBgn0003507	srpRnaiHandGal4	KK	KKControlxHandGal4
Positive	26020	CG44422	FBgn0265595	CG44422xHandGal4	TRiP	controlTrIPSDxHandGal4
Positive	28776	CG32506	FBgn0052506	CG32506xHandGal4	TRiP	controlTrIPSDxHandGal4
Positive	VDRC 102196	luna	FBgn0040765	lunaRnaiHandGal4	KK	KKControlxHandGal4
Positive	VDRC 108399	Eip75B	FBgn0000568	E75RnaiHandGal4	KK	KKControlxHandGal4
Positive	VDRC 101925	lola	FBgn0283521	lolaRnaiHandGal4	KK	KKControlxHandGal4
Positive	VDRC	Bru3	FBgn0264001	Bru3RnaiHandGal4	KK	KKControlxHandGal4

## Sheet: lines_infos_random_genes
GWAS.control.type	line.ID	gene	Flybase.ID	Cross	genotype.background	background.control
control				W1118xHand	VDRC	W1118xHand
control	60000			GDControlHandGal4	GD	UASGFPVal10HandGal4
control	60100			KKControlHandGal4	KK	UASGFPVal10HandGal4
control				UASGFPVal10HandGal4	TRiP	UASGFPVal10HandGal4
random				NesdHMSRnaiHandGal4	TRiP	UASGFPVal10HandGal4
random				CG15414RNAiHandGal4	TRiP	UASGFPVal10HandGal4
random				CG42594RNAiHandGal4	TRiP	UASGFPVal10HandGal4
random				DgkRnaiHandGal4	TRiP	UASGFPVal10HandGal4
random				Oatp58DcRnaiHandGal4	TRiP	UASGFPVal10HandGal4
random				CG12539RnaiHandGal4	TRiP	UASGFPVal10HandGal4
random				CG7335RnaiHandGal4	TRiP	UASGFPVal10HandGal4
random				CG17065RnaiHandGal4	TRiP	UASGFPVal10HandGal4
random				Sin3AxHandGal4	KK	KKControlxHandGal4
random				Orc3xHandGal4	KK	KKControlxHandGal4
random				CG14457xHandGal4	KK	KKControlxHandGal4
random				Lcp9xHandGal4	GD	GDControlxHandGal4
random				DekxHandGal4	KK	KKControlxHandGal4
random				conaxHandGal4	KK	KKControlxHandGal4
random				CG3262xHandGal4	KK	KKControlxHandGal4
random				CG42594xHandGal4	GD	GDControlxHandGal4
random				CG12688xHandGal4	KK	KKControlxHandGal4
random				CG5003xHandGal4	GD	GDControlxHandGal4
random				ZifxHandGal4	KK	KKControlxHandGal4

## Sheet: data_random_04_03_18
File.Name	Scale.Factor	GenoType	ID	Comments	Age	Sex	Type	Heart.Rate.Mean	Heart.Rate.Median	Heart.Rate.Stddev	Heart.Rate.SDonMean				Heart.Period.Mean	Heart.Period.Median	Heart.Period.Stddev	Heart.Period.SDonMean				Diastolic.Interval.Mean	Diastolic.Interval.Median	Diastolic.Interval.Stddev	Diastolic.Interval.SDonMean	DIonHPmean	Diastolic.Interval.TotalTime				Systolic.Interval.Mean	Systolic.Interval.Median	Systolic.Interval.Stddev	Systolic.Interval.SDonMean	SIonHPmean	Systolic.Interval.TotalTime	SIAI		Arrhythmia.Index	SIMean.on.DIMean	1st.Diastolic.Diameter.Vertical	2nd.Diastolic.Diameter.Vertical	Avg.Diastolic.Diameter	1st.Systolic.Diameter.Vertical	2nd.Systolic.Diameter.Vertical	Avg.Systolic.Diameter	Fractional.Shortening	1stDiastolicHorizontal	DiastolicSurfaceArea(mm^2)
NesdHMSRnaiHandGal4_01_1wf_C11440_30s_030418	0.633	NesdHMSRnaiHandGal4	1	30418	1	f	random	2.71041	2.66811	0.159524	0.0597893				0.370019	0.374798	0.0195371	0.0521272				0.204442	0.206545	0.0188147	0.0910926	0.552518	16.5598				0.16522	0.168262	0.00482614	0.0286823	0.446519	13.2176			0.0521272	0.808152	80.401	82.9447	81.6729	56.97	59.502	58.236	0.28696
NesdHMSRnaiHandGal4_02_1wf_C11440_30s_030418	0.633	NesdHMSRnaiHandGal4	2	30418	1	f	random	1.58454	1.43662	0.49135	0.342018				0.675778	0.696077	0.159784	0.229549				0.434031	0.451288	0.161746	0.358409	0.642268	18.6633				0.241815	0.237142	0.040815	0.172112	0.357833	10.6399			0.229549	0.557139	88.6403	87.4365	88.0384	50.007	46.842	48.4245	0.449962
NesdHMSRnaiHandGal4_03_1wf_C11440_30s_030418	0.633	NesdHMSRnaiHandGal4	3	30418	1	f	random	1.12579	1.1174	0.229059	0.204993				0.933915	0.894936	0.237222	0.265072				0.70296	0.657814	0.237561	0.361136	0.752702	21.7918				0.231386	0.229472	0.00604844	0.0263581	0.247759	7.40434			0.265072	0.329159	91.8614	90.5212	91.1913	56.3406	65.2021	60.7713	0.333584
NesdHMSRnaiHandGal4_04_1wf_C11440_30s_030418	0.633	NesdHMSRnaiHandGal4	4	30418	1	f	random	2.11732	2.01132	0.848525	0.421874				0.569259	0.497242	0.284195	0.571543				0.372448	0.313608	0.27753	0.884958	0.654267	19.3673				0.196706	0.191216	0.0353209	0.184718	0.345548	10.4254			0.571543	0.528145	88.629	80.4309	84.53	50.0711	49.4105	49.7408	0.41156
NesdHMSRnaiHandGal4_05_1wf_C11440_30s_030418	0.633	NesdHMSRnaiHandGal4	5	30418	1	f	random	1.64987	1.63419	0.225668	0.138092				0.615009	0.611925	0.0673073	0.109993				0.398704	0.397753	0.0668317	0.168023	0.64829	19.1378				0.215603	0.214173	0.00528974	0.0246984	0.350569	10.349			0.109993	0.54076	84.907	69.0086	76.9578	49.0728	40.5565	44.8146	0.417672
NesdHMSRnaiHandGal4_06_1wf_C11440_30s_030418	0.633	NesdHMSRnaiHandGal4	6	30418	1	f	random	1.20164	1.25708	0.153442	0.122062				0.846631	0.795494	0.132067	0.166019				0.619127	0.566023	0.131374	0.232101	0.731283	21.6694				0.227504	0.229469	0.00466062	0.0203104	0.268717	7.96266			0.166019	0.36746	98.6364	88.2621	93.4492	58.2498	43.9696	51.1097	0.453075
NesdHMSRnaiHandGal4_07_1wf_C11440_30s_030418	0.633	NesdHMSRnaiHandGal4	7	30418	1	f	random	1.78833	1.59442	0.5414	0.339558				0.590654	0.627189	0.120539	0.192189				0.407843	0.451286	0.124429	0.275722	0.690495	20.3922				0.182526	0.175953	0.0152864	0.0868778	0.309023	9.30881			0.192189	0.447538	86.9079	82.923	84.9155	52.6761	46.2263	49.4512	0.417642
NesdHMSRnaiHandGal4_08_1wf_C11440_30s_030418	0.633	NesdHMSRnaiHandGal4	8	30418	1	f	random	1.22365	1.19939	0.114738	0.0956638				0.823685	0.833756	0.0715402	0.0858047				0.639451	0.650137	0.0697701	0.107316	0.77633	22.3808				0.184216	0.183582	0.00584515	0.0318394	0.223649	6.63179			0.0858047	0.288085	95.6354	73.6813	84.6583	65.2021	50.5212	57.8616	0.316528
NesdHMSRnaiHandGal4_09_1wf_C11440_30s_030418	0.633	NesdHMSRnaiHandGal4	9	30418	1	f	random	1.21662	1.22183	0.116579	0.0954135				0.829463	0.826105	0.0791012	0.095752				0.60383	0.596636	0.0807086	0.135273	0.727977	21.134				0.228816	0.229469	0.00428583	0.0186772	0.27586	8.00856			0.095752	0.378941	89.8882	76.0891	82.9887	53.2059	43.2112	48.2086	0.419095
NesdHMSRnaiHandGal4_10_1wf_C11440_30s_030418	0.633	NesdHMSRnaiHandGal4	10	30418	1	f	random	2.19076	1.53808	1.19845	0.779181				0.555778	0.65016	0.24959	0.383891				0.345648	0.451287	0.231523	0.513028	0.621917	18.3193				0.209921	0.191245	0.0772334	0.403846	0.377707	11.3357			0.383891	0.607327	80.4134		80.4134	43.6816		43.6816	0.456787
NesdHMSRnaiHandGal4_11_1wf_C11440_30s_030418	0.633	NesdHMSRnaiHandGal4	11	30418	1	f	random	1.29908	1.30736	0.0537869	0.0411415				0.771098	0.764898	0.0330326	0.0431856				0.572659	0.573675	0.0334531	0.0583136	0.742654	21.7611				0.196465	0.198874	0.00429752	0.0216093	0.254785	7.46565			0.0431856	0.343074	86.9079	78.5558	82.7319	60.8207	47.4919	54.1563	0.3454
NesdHMSRnaiHandGal4_12_1wf_C11440_30s_030418	0.633	NesdHMSRnaiHandGal4	12	30418	1	f	random	2.01723	1.98096	0.401697	0.202779				0.515702	0.504807	0.103247	0.204527				0.325281	0.313614	0.0974538	0.310745	0.630755	18.541				0.190698	0.191221	0.00898481	0.0469864	0.369784	11.0605			0.204527	0.586256	81.0463	71.6661	76.3562	48.741	43.1184	45.9297	0.398481
NesdHMSRnaiHandGal4_13_1wf_C11440_30s_030418	0.633	NesdHMSRnaiHandGal4	13	30418	1	f	random	2.41486	2.37724	0.089636	0.0377058				0.414552	0.420655	0.0147053	0.034958				0.249017	0.252412	0.0133089	0.0527269	0.600688	17.9292				0.165476	0.168255	0.00461289	0.027416	0.399168	11.7488			0.034958	0.664518	89.9217	77.8693	83.8955	64.7643	46.8591	55.8117	0.334747
NesdHMSRnaiHandGal4_14_1wf_C11440_30s_030418	0.633	NesdHMSRnaiHandGal4	14	30418	1	f	random	2.19562	2.21589	0.214665	0.0968754				0.460372	0.451288	0.0530105	0.117465				0.285042	0.275365	0.0506193	0.183826	0.619156	18.2427				0.175339	0.175926	0.00561708	0.0319286	0.380864	11.397			0.117465	0.615134	81.7453	70.6242	76.1847	58.2394	44.5535	51.3965	0.325371
NesdHMSRnaiHandGal4_15_1wf_C11440_30s_030418	0.633	NesdHMSRnaiHandGal4	15	30418	1	f	random	0.984665	0.940561	0.140582	0.149466				1.0337	1.06324	0.137992	0.129785				0.822266	0.849068	0.137715	0.162196	0.795457	23.0234				0.211531	0.214148	0.00447673	0.0209049	0.204634	6.1344			0.129785	0.257254	87.9961	75.2312	81.6136	61.4141	46.2133	53.8137	0.340629
nesdHMSRnaiHandGal4_01_1wf_C11440_30s_300318	0.633	NesdHMSRnaiHandGal4	1	300318	1	f	random	2.57383	2.51429	0.178475	0.0709842				0.390097	0.397738	0.0252754	0.0635479				0.221316	0.221832	0.023462	0.105765	0.567335	16.82				0.168782	0.168279	0.00361633	0.0214901	0.432665	12.8274			0.0635479	0.762627	95.6354	81.6791	88.6572	64.6776	53.805	59.2413	0.331794
nesdHMSRnaiHandGal4_02_1wf_C11440_30s_300318	0.633	NesdHMSRnaiHandGal4	2	300318	1	f	random	1.19133	1.19942	0.0544152	0.0453679				0.841168	0.833735	0.0399341	0.0478979				0.646884	0.634861	0.0393664	0.0620079	0.769031	22.641				0.194284	0.191238	0.00482921	0.0252523	0.230969	6.79994			0.0478979	0.300338	82.4457	72.5054	77.4756	53.8087	46.8292	50.3189	0.350518
nesdHMSRnaiHandGal4_03_1wf_C11440_30s_300318	0.633	NesdHMSRnaiHandGal4	3	300318	1	f	random	3.00761	2.90525	0.293805	0.101129				0.334816	0.344204	0.027189	0.0789909				0.167762	0.175931	0.0271945	0.154575	0.501058	14.9308				0.167074	0.168274	0.00472783	0.028096	0.499003	14.8696			0.0789909	0.995899	86.9517	58.8996	72.9257	60.1583	39.8991	50.0287	0.313977
nesdHMSRnaiHandGal4_04_1wf_C11440_30s_300318	0.633	NesdHMSRnaiHandGal4	4	300318	1	f	random	1.13779	1.15693	0.0616331	0.0532732				0.881254	0.86436	0.0488249	0.0564867				0.682558	0.680765	0.036778	0.0540245	0.77453	23.207				0.19725	0.183597	0.0211664	0.115287	0.223829	6.50926			0.0564867	0.288987	85.1614	79.7605	82.461	56.7657	48.7451	52.7554	0.360238
nesdHMSRnaiHandGal4_05_1wf_C11440_30s_300318	0.633	NesdHMSRnaiHandGal4	5	300318	1	f	random	3.08886	3.11264	0.0572191	0.0183828				0.323834	0.321272	0.00590803	0.0183895				0.170438	0.16829	0.00585438	0.0347874	0.526314	15.6803				0.153395	0.152979	0.00211003	0.013793	0.473686	14.1124			0.0183895	0.900005	93.761	85.4573	89.6091	68.4109	54.4527	61.4318	0.314447
nesdHMSRnaiHandGal4_06_1wf_C11440_30s_300318	0.633	NesdHMSRnaiHandGal4	6	300318	1	f	random	1.35157	1.3478	0.0419288	0.0311091				0.740577	0.74195	0.0225556	0.0304005				0.559356	0.566009	0.0241253	0.0426236	0.755298	21.8149				0.18128	0.183571	0.00483436	0.0263351	0.244782	7.25119			0.0304005	0.324087	85.9809		85.9809	53.1795		53.1795	0.381496
nesdHMSRnaiHandGal4_07_1wf_C11440_30s_300318	0.633	NesdHMSRnaiHandGal4	7	300318	1	f	random	1.6734	1.63417	0.203292	0.124401				0.605862	0.611937	0.0700539	0.114479				0.403678	0.413044	0.0695235	0.16832	0.666287	19.7802				0.203244	0.206505	0.00715768	0.0346611	0.335462	9.95895			0.114479	0.50348	78.515	67.4583	72.9866	53.8385	42.0838	47.9611	0.342878
nesdHMSRnaiHandGal4_08_1wf_C11440_30s_300318	0.633	NesdHMSRnaiHandGal4	8	300318	1	f	random	1.68066	1.61407	0.158131	0.0979701				0.598961	0.619551	0.0509423	0.0822246				0.406331	0.420695	0.0454509	0.108038	0.678392	19.9102				0.192756	0.191238	0.00700773	0.0366439	0.321816	9.63778			0.0822246	0.474381	76.0022	68.7177	72.3599	51.2769	44.8538	48.0653	0.335747
nesdHMSRnaiHandGal4_09_1wf_C11440_30s_300318	0.633	NesdHMSRnaiHandGal4	9	300318	1	f	random	2.08407	2.07514	0.0658618	0.0317385				0.48028	0.481897	0.0144421	0.0299693				0.290782	0.298279	0.0156186	0.0523624	0.605442	18.0285				0.189498	0.191223	0.00363328	0.0190002	0.394558	11.7489			0.0299693	0.651685	81.3226	67.7665	74.5446	50.163	42.0838	46.1234	0.381264
nesdHMSRnaiHandGal4_10_1wf_C11440_30s_300318	0.633	NesdHMSRnaiHandGal4	10	300318	1	f	random	2.00772	1.89473	0.358569	0.189245				0.507601	0.527781	0.0604541	0.114544				0.309786	0.328918	0.0592782	0.180222	0.610294	17.9676				0.198093	0.198862	0.00629982	0.0316794	0.390253	11.6875			0.114544	0.639452	84.2271	72.1731	78.2001	56.9841	44.3145	50.6493	0.352312
nesdHMSRnaiHandGal4_11_1wf_C11440_30s_300318	0.633	NesdHMSRnaiHandGal4	11	300318	1	f	random	1.43236	1.36187	0.237539	0.174421				0.715644	0.734283	0.113513	0.15459				0.521249	0.527799	0.111495	0.211244	0.728364	21.3712				0.194684	0.191227	0.00921591	0.0481936	0.27204	8.17672			0.15459	0.373495	96.9234	82.3776	89.6505	62.6798	51.3082	56.994	0.364265
nesdHMSRnaiHandGal4_12_1wf_C11440_30s_300318	0.633	NesdHMSRnaiHandGal4	12	300318	1	f	random	2.25232	2.25399	0.0661879	0.0293647				0.444335	0.443657	0.0119059	0.0268358				0.27768	0.282993	0.0129017	0.0455901	0.624933	18.3269				0.16668	0.168275	0.00437983	0.0260278	0.375122	11.1675			0.0268358	0.600259	83.6423	111.1	97.3712	45.6858	79.0946	62.3902	0.359254
nesdHMSRnaiHandGal4_13_1wf_C11440_30s_300318	0.633	NesdHMSRnaiHandGal4	13	300318	1	f	random	0.881699	0.848951	0.126417	0.14891				1.14888	1.17792	0.111378	0.0945545				0.905336	0.933174	0.111422	0.119401	0.78802	22.6334				0.243586	0.244757	0.00367339	0.0150083	0.212021	6.33323			0.0945545	0.269056	93.1285	101.258	97.1934	59.502	64.0614	61.7817	0.364343
nesdHMSRnaiHandGal4_14_1wf_C11440_30s_300318	0.633	NesdHMSRnaiHandGal4	14	300318	1	f	random	1.65968	1.63416	0.293199	0.179419				0.615498	0.611934	0.0770235	0.125869				0.422807	0.428335	0.0745288	0.173997	0.686935	19.8719				0.192979	0.198863	0.0122386	0.0615427	0.313534	9.26301			0.125869	0.456425	94.969	75.4572	85.2131	67.7428	47.6267	57.6848	0.323053
nesdHMSRnaiHandGal4_15_1wf_C11440_30s_300318	0.633	NesdHMSRnaiHandGal4	15	300318	1	f	random	1.02367	1.02137	0.0460676	0.0451037				0.978813	0.979084	0.0430711	0.0439912				0.785294	0.787848	0.0431814	0.0548093	0.802291	23.5588				0.193446	0.191225	0.00412264	0.0215591	0.197633	5.99681			0.0439912	0.246335	86.1089	79.2161	82.6625	51.3082	46.3173	48.8127	0.409494
uasGFPval10HandGal4_01_1wf_C11440_30s_300318	0.633	UASGFPVal10HandGal4	1	300318	1	f	control	1.20035	1.16729	0.339221	0.290605				0.907595	0.887291	0.289142	0.32587				0.675019	0.642517	0.290091	0.451491	0.743745	21.6006				0.231787	0.244743	0.023504	0.0960356	0.255386	7.64898			0.32587	0.343379	90.6981	70.5476	80.6228	60.2548	42.7123	51.4835	0.361427
uasGFPval10HandGal4_01_1wf_C11440_30s_300318	0.633	UASGFPVal10HandGal4	1	300318	1	f	control	1.20035	1.16729	0.339221	0.290605				0.907595	0.887291	0.289142	0.32587				0.675019	0.642517	0.290091	0.451491	0.743745	21.6006				0.231787	0.244743	0.023504	0.0960356	0.255386	7.64898			0.32587	0.343379	90.6981	70.5476	80.6228	60.2548	42.7123	51.4835	0.361427
uasGFPval10HandGal4_02_1wf_C11440_30s_300318	0.633	UASGFPVal10HandGal4	2	300318	1	f	control	0.883	0.914261	0.132514	0.144941				1.16172	1.09378	0.214484	0.196095				0.958876	0.887253	0.21636	0.243854	0.825391	23.9719				0.202848	0.198897	0.00590533	0.0296904	0.174609	5.0712			0.196095	0.211548	94.351	80.4533	87.4021	72.187	52.6	62.3935	0.286133
uasGFPval10HandGal4_02_1wf_C11440_30s_300318	0.633	UASGFPVal10HandGal4	2	300318	1	f	control	0.883	0.914261	0.132514	0.144941				1.16172	1.09378	0.214484	0.196095				0.958876	0.887253	0.21636	0.243854	0.825391	23.9719				0.202848	0.198897	0.00590533	0.0296904	0.174609	5.0712			0.196095	0.211548	94.351	80.4533	87.4021	72.187	52.6	62.3935	0.286133
uasGFPval10HandGal4_03_1wf_C11440_30s_300318	0.633	UASGFPVal10HandGal4	3	300318	1	f	control	1.12936	1.17781	0.234625	0.199205				0.929965	0.849036	0.237727	0.279996				0.695818	0.611921	0.240742	0.39342	0.748219	22.2662				0.225404	0.221831	0.00799558	0.0360435	0.242379	7.21293			0.279996	0.323941	71.5318		71.5318	42.411		42.411	0.407103
uasGFPval10HandGal4_03_1wf_C11440_30s_300318	0.633	UASGFPVal10HandGal4	3	300318	1	f	control	1.12936	1.17781	0.234625	0.199205				0.929965	0.849036	0.237727	0.279996				0.695818	0.611921	0.240742	0.39342	0.748219	22.2662				0.225404	0.221831	0.00799558	0.0360435	0.242379	7.21293			0.279996	0.323941	71.5318		71.5318	42.411		42.411	0.407103
uasGFPval10HandGal4_04_1wf_C11440_30s_300318	0.633	UASGFPVal10HandGal4	4	300318	1	f	control	1.3754	1.29442	0.233796	0.180619				0.744302	0.772548	0.112883	0.146117				0.526017	0.573669	0.117623	0.205037	0.706725	20.5147				0.217991	0.221801	0.00967159	0.0436048	0.29288	8.71964			0.146117	0.414418	79.7982		79.7982	53.8385		53.8385	0.325317
uasGFPval10HandGal4_04_1wf_C11440_30s_300318	0.633	UASGFPVal10HandGal4	4	300318	1	f	control	1.3754	1.29442	0.233796	0.180619				0.744302	0.772548	0.112883	0.146117				0.526017	0.573669	0.117623	0.205037	0.706725	20.5147				0.217991	0.221801	0.00967159	0.0436048	0.29288	8.71964			0.146117	0.414418	79.7982		79.7982	53.8385		53.8385	0.325317
uasGFPval10HandGal4_05_1wf_C11440_30s_300318	0.633	UASGFPVal10HandGal4	5	300318	1	f	control	1.19775	1.23335	0.100519	0.0815006				0.840293	0.810801	0.0748823	0.092356				0.557061	0.527777	0.0734559	0.13918	0.662937	19.4971				0.283232	0.283013	0.00342129	0.0120888	0.337063	9.91312			0.092356	0.50844	84.3293		84.3293	58.1017		58.1017	0.311014
uasGFPval10HandGal4_05_1wf_C11440_30s_300318	0.633	UASGFPVal10HandGal4	5	300318	1	f	control	1.19775	1.23335	0.100519	0.0815006				0.840293	0.810801	0.0748823	0.092356				0.557061	0.527777	0.0734559	0.13918	0.662937	19.4971				0.283232	0.283013	0.00342129	0.0120888	0.337063	9.91312			0.092356	0.50844	84.3293		84.3293	58.1017		58.1017	0.311014
uasGFPval10HandGal4_06_1wf_C11440_30s_300318	0.633	UASGFPVal10HandGal4	6	300318	1	f	control	1.60871	1.50272	0.447285	0.297649				0.65577	0.665458	0.134834	0.202619				0.465399	0.474239	0.135148	0.284979	0.709698	20.9429				0.19039	0.191223	0.00607382	0.031763	0.290331	8.75795			0.202619	0.409091	83.5656	84.8314	84.1985	57.6065	61.4043	59.5054	0.293273
uasGFPval10HandGal4_06_1wf_C11440_30s_300318	0.633	UASGFPVal10HandGal4	6	300318	1	f	control	1.60871	1.50272	0.447285	0.297649				0.65577	0.665458	0.134834	0.202619				0.465399	0.474239	0.135148	0.284979	0.709698	20.9429				0.19039	0.191223	0.00607382	0.031763	0.290331	8.75795			0.202619	0.409091	83.5656	84.8314	84.1985	57.6065	61.4043	59.5054	0.293273
uasGFPval10HandGal4_07_1wf_C11440_30s_300318	0.633	UASGFPVal10HandGal4	7	300318	1	f	control	1.99544	1.98081	0.409508	0.206737				0.528057	0.504843	0.144632	0.28649				0.346931	0.336527	0.144045	0.428034	0.656996	19.4282				0.181667	0.183554	0.01156	0.0629789	0.344029	10.1733			0.28649	0.52364	79.758	70.3883	75.0732	50.7033	40.0344	45.3688	0.395672
uasGFPval10HandGal4_07_1wf_C11440_30s_300318	0.633	UASGFPVal10HandGal4	7	300318	1	f	control	1.99544	1.98081	0.409508	0.206737				0.528057	0.504843	0.144632	0.28649				0.346931	0.336527	0.144045	0.428034	0.656996	19.4282				0.181667	0.183554	0.01156	0.0629789	0.344029	10.1733			0.28649	0.52364	79.758	70.3883	75.0732	50.7033	40.0344	45.3688	0.395672
uasGFPval10HandGal4_08_1wf_C11440_30s_300318	0.633	UASGFPVal10HandGal4	8	300318	1	f	control	1.6483	1.32062	0.700484	0.530421				0.67293	0.75722	0.205352	0.271192				0.485267	0.558339	0.198903	0.35624	0.721125	20.8665				0.187744	0.191222	0.00978645	0.0511785	0.278995	8.26075			0.271192	0.386889	80.5677	65.3954	72.9816	52.7673	42.4299	47.5986	0.3478
uasGFPval10HandGal4_08_1wf_C11440_30s_300318	0.633	UASGFPVal10HandGal4	8	300318	1	f	control	1.6483	1.32062	0.700484	0.530421				0.67293	0.75722	0.205352	0.271192				0.485267	0.558339	0.198903	0.35624	0.721125	20.8665				0.187744	0.191222	0.00978645	0.0511785	0.278995	8.26075			0.271192	0.386889	80.5677	65.3954	72.9816	52.7673	42.4299	47.5986	0.3478
uasGFPval10HandGal4_09_1wf_C11440_30s_300318	0.633	UASGFPVal10HandGal4	9	300318	1	f	control	1.75934	1.76675	0.559747	0.316823				0.616219	0.573698	0.168715	0.294082				0.411768	0.367165	0.168263	0.458275	0.668217	19.7649				0.20465	0.206539	0.0161404	0.0781469	0.332105	10.0278			0.294082	0.497002	77.6632	64.6156	71.1394	50.406	29.7577	40.0819	0.436573
uasGFPval10HandGal4_09_1wf_C11440_30s_300318	0.633	UASGFPVal10HandGal4	9	300318	1	f	control	1.75934	1.76675	0.559747	0.316823				0.616219	0.573698	0.168715	0.294082				0.411768	0.367165	0.168263	0.458275	0.668217	19.7649				0.20465	0.206539	0.0161404	0.0781469	0.332105	10.0278			0.294082	0.497002	77.6632	64.6156	71.1394	50.406	29.7577	40.0819	0.436573
uasGFPval10HandGal4_10_1wf_C11440_30s_300318	0.633	UASGFPVal10HandGal4	10	300318	1	f	control	1.61478	1.6342	0.156747	0.095917				0.625718	0.619566	0.0679745	0.109713				0.451777	0.443624	0.0673336	0.151781	0.722014	21.2335				0.175112	0.175923	0.0074845	0.0425441	0.279858	8.23027			0.109713	0.387607	82.9616	84.881	83.9213	58.291	58.8826	58.5868	0.301884
uasGFPval10HandGal4_10_1wf_C11440_30s_300318	0.633	UASGFPVal10HandGal4	10	300318	1	f	control	1.61478	1.6342	0.156747	0.095917				0.625718	0.619566	0.0679745	0.109713				0.451777	0.443624	0.0673336	0.151781	0.722014	21.2335				0.175112	0.175923	0.0074845	0.0425441	0.279858	8.23027			0.109713	0.387607	82.9616	84.881	83.9213	58.291	58.8826	58.5868	0.301884
uasGFPval10HandGal4_11_1wf_C11440_30s_300318	0.633	UASGFPVal10HandGal4	11	300318	1	f	control	1.94738	1.95125	0.0640603	0.0328303				0.514063	0.512493	0.016925	0.0330249				0.288814	0.290637	0.0141281	0.0486107	0.561826	16.7512				0.225249	0.221853	0.00566145	0.0255189	0.438174	13.0645			0.0330249	0.779911	87.4113	77.8616	82.6364	64.6435	51.9099	58.2767	0.294782
uasGFPval10HandGal4_11_1wf_C11440_30s_300318	0.633	UASGFPVal10HandGal4	11	300318	1	f	control	1.94738	1.95125	0.0640603	0.0328303				0.514063	0.512493	0.016925	0.0330249				0.288814	0.290637	0.0141281	0.0486107	0.561826	16.7512				0.225249	0.221853	0.00566145	0.0255189	0.438174	13.0645			0.0330249	0.779911	87.4113	77.8616	82.6364	64.6435	51.9099	58.2767	0.294782
uasGFPval10HandGal4_12_1wf_C11440_30s_300318	0.633	UASGFPVal10HandGal4	12	300318	1	f	control	1.87551	1.8157	0.412487	0.227178				0.55823	0.550753	0.119071	0.216197				0.376098	0.374768	0.118059	0.315019	0.673734	19.9332				0.181875	0.175948	0.0143398	0.0815003	0.325807	9.82125			0.216197	0.483584	94.3701	102.068	98.2191	61.4043	67.7665	64.5854	0.342436
uasGFPval10HandGal4_12_1wf_C11440_30s_300318	0.633	UASGFPVal10HandGal4	12	300318	1	f	control	1.87551	1.8157	0.412487	0.227178				0.55823	0.550753	0.119071	0.216197				0.376098	0.374768	0.118059	0.315019	0.673734	19.9332				0.181875	0.175948	0.0143398	0.0815003	0.325807	9.82125			0.216197	0.483584	94.3701	102.068	98.2191	61.4043	67.7665	64.5854	0.342436
uasGFPval10HandGal4_13_1wf_C11440_30s_300318	0.633	UASGFPVal10HandGal4	13	300318	1	f	control	1.29707	1.29438	0.104888	0.081033				0.775968	0.780191	0.0623021	0.0798549				0.581325	0.581336	0.0607655	0.104527	0.749162	22.0904				0.194751	0.198853	0.0108779	0.0547033	0.250979	7.5953			0.0798549	0.335013	94.3934	95.6312	95.0123	65.3954	56.337	60.8662	0.359386
uasGFPval10HandGal4_13_1wf_C11440_30s_300318	0.633	UASGFPVal10HandGal4	13	300318	1	f	control	1.29707	1.29438	0.104888	0.081033				0.775968	0.780191	0.0623021	0.0798549				0.581325	0.581336	0.0607655	0.104527	0.749162	22.0904				0.194751	0.198853	0.0108779	0.0547033	0.250979	7.5953			0.0798549	0.335013	94.3934	95.6312	95.0123	65.3954	56.337	60.8662	0.359386
uasGFPval10HandGal4_01_1wf_C11440_30s_300318	0.633	UASGFPVal10HandGal4	1	300318	1	f	control	1.20035	1.16729	0.339221	0.290605				0.907595	0.887291	0.289142	0.32587				0.675019	0.642517	0.290091	0.451491	0.743745	21.6006				0.231787	0.244743	0.023504	0.0960356	0.255386	7.64898			0.32587	0.343379	90.6981	70.5476	80.6228	60.2548	42.7123	51.4835	0.361427
uasGFPval10HandGal4_01_1wf_C11440_30s_300318	0.633	UASGFPVal10HandGal4	1	300318	1	f	control	1.20035	1.16729	0.339221	0.290605				0.907595	0.887291	0.289142	0.32587				0.675019	0.642517	0.290091	0.451491	0.743745	21.6006				0.231787	0.244743	0.023504	0.0960356	0.255386	7.64898			0.32587	0.343379	90.6981	70.5476	80.6228	60.2548	42.7123	51.4835	0.361427
uasGFPval10HandGal4_02_1wf_C11440_30s_300318	0.633	UASGFPVal10HandGal4	2	300318	1	f	control	0.883	0.914261	0.132514	0.144941				1.16172	1.09378	0.214484	0.196095				0.958876	0.887253	0.21636	0.243854	0.825391	23.9719				0.202848	0.198897	0.00590533	0.0296904	0.174609	5.0712			0.196095	0.211548	94.351	80.4533	87.4021	72.187	52.6	62.3935	0.286133
uasGFPval10HandGal4_02_1wf_C11440_30s_300318	0.633	UASGFPVal10HandGal4	2	300318	1	f	control	0.883	0.914261	0.132514	0.144941				1.16172	1.09378	0.214484	0.196095				0.958876	0.887253	0.21636	0.243854	0.825391	23.9719				0.202848	0.198897	0.00590533	0.0296904	0.174609	5.0712			0.196095	0.211548	94.351	80.4533	87.4021	72.187	52.6	62.3935	0.286133
uasGFPval10HandGal4_03_1wf_C11440_30s_300318	0.633	UASGFPVal10HandGal4	3	300318	1	f	control	1.12936	1.17781	0.234625	0.199205				0.929965	0.849036	0.237727	0.279996				0.695818	0.611921	0.240742	0.39342	0.748219	22.2662				0.225404	0.221831	0.00799558	0.0360435	0.242379	7.21293			0.279996	0.323941	71.5318		71.5318	42.411		42.411	0.407103
uasGFPval10HandGal4_03_1wf_C11440_30s_300318	0.633	UASGFPVal10HandGal4	3	300318	1	f	control	1.12936	1.17781	0.234625	0.199205				0.929965	0.849036	0.237727	0.279996				0.695818	0.611921	0.240742	0.39342	0.748219	22.2662				0.225404	0.221831	0.00799558	0.0360435	0.242379	7.21293			0.279996	0.323941	71.5318		71.5318	42.411		42.411	0.407103
uasGFPval10HandGal4_04_1wf_C11440_30s_300318	0.633	UASGFPVal10HandGal4	4	300318	1	f	control	1.3754	1.29442	0.233796	0.180619				0.744302	0.772548	0.112883	0.146117				0.526017	0.573669	0.117623	0.205037	0.706725	20.5147				0.217991	0.221801	0.00967159	0.0436048	0.29288	8.71964			0.146117	0.414418	79.7982		79.7982	53.8385		53.8385	0.325317
uasGFPval10HandGal4_04_1wf_C11440_30s_300318	0.633	UASGFPVal10HandGal4	4	300318	1	f	control	1.3754	1.29442	0.233796	0.180619				0.744302	0.772548	0.112883	0.146117				0.526017	0.573669	0.117623	0.205037	0.706725	20.5147				0.217991	0.221801	0.00967159	0.0436048	0.29288	8.71964			0.146117	0.414418	79.7982		79.7982	53.8385		53.8385	0.325317
uasGFPval10HandGal4_05_1wf_C11440_30s_300318	0.633	UASGFPVal10HandGal4	5	300318	1	f	control	1.19775	1.23335	0.100519	0.0815006				0.840293	0.810801	0.0748823	0.092356				0.557061	0.527777	0.0734559	0.13918	0.662937	19.4971				0.283232	0.283013	0.00342129	0.0120888	0.337063	9.91312			0.092356	0.50844	84.3293		84.3293	58.1017		58.1017	0.311014
uasGFPval10HandGal4_05_1wf_C11440_30s_300318	0.633	UASGFPVal10HandGal4	5	300318	1	f	control	1.19775	1.23335	0.100519	0.0815006				0.840293	0.810801	0.0748823	0.092356				0.557061	0.527777	0.0734559	0.13918	0.662937	19.4971				0.283232	0.283013	0.00342129	0.0120888	0.337063	9.91312			0.092356	0.50844	84.3293		84.3293	58.1017		58.1017	0.311014
uasGFPval10HandGal4_06_1wf_C11440_30s_300318	0.633	UASGFPVal10HandGal4	6	300318	1	f	control	1.60871	1.50272	0.447285	0.297649				0.65577	0.665458	0.134834	0.202619				0.465399	0.474239	0.135148	0.284979	0.709698	20.9429				0.19039	0.191223	0.00607382	0.031763	0.290331	8.75795			0.202619	0.409091	83.5656	84.8314	84.1985	57.6065	61.4043	59.5054	0.293273
uasGFPval10HandGal4_06_1wf_C11440_30s_300318	0.633	UASGFPVal10HandGal4	6	300318	1	f	control	1.60871	1.50272	0.447285	0.297649				0.65577	0.665458	0.134834	0.202619				0.465399	0.474239	0.135148	0.284979	0.709698	20.9429				0.19039	0.191223	0.00607382	0.031763	0.290331	8.75795			0.202619	0.409091	83.5656	84.8314	84.1985	57.6065	61.4043	59.5054	0.293273
uasGFPval10HandGal4_07_1wf_C11440_30s_300318	0.633	UASGFPVal10HandGal4	7	300318	1	f	control	1.99544	1.98081	0.409508	0.206737				0.528057	0.504843	0.144632	0.28649				0.346931	0.336527	0.144045	0.428034	0.656996	19.4282				0.181667	0.183554	0.01156	0.0629789	0.344029	10.1733			0.28649	0.52364	79.758	70.3883	75.0732	50.7033	40.0344	45.3688	0.395672
uasGFPval10HandGal4_07_1wf_C11440_30s_300318	0.633	UASGFPVal10HandGal4	7	300318	1	f	control	1.99544	1.98081	0.409508	0.206737				0.528057	0.504843	0.144632	0.28649				0.346931	0.336527	0.144045	0.428034	0.656996	19.4282				0.181667	0.183554	0.01156	0.0629789	0.344029	10.1733			0.28649	0.52364	79.758	70.3883	75.0732	50.7033	40.0344	45.3688	0.395672
uasGFPval10HandGal4_08_1wf_C11440_30s_300318	0.633	UASGFPVal10HandGal4	8	300318	1	f	control	1.6483	1.32062	0.700484	0.530421				0.67293	0.75722	0.205352	0.271192				0.485267	0.558339	0.198903	0.35624	0.721125	20.8665				0.187744	0.191222	0.00978645	0.0511785	0.278995	8.26075			0.271192	0.386889	80.5677	65.3954	72.9816	52.7673	42.4299	47.5986	0.3478
uasGFPval10HandGal4_08_1wf_C11440_30s_300318	0.633	UASGFPVal10HandGal4	8	300318	1	f	control	1.6483	1.32062	0.700484	0.530421				0.67293	0.75722	0.205352	0.271192				0.485267	0.558339	0.198903	0.35624	0.721125	20.8665				0.187744	0.191222	0.00978645	0.0511785	0.278995	8.26075			0.271192	0.386889	80.5677	65.3954	72.9816	52.7673	42.4299	47.5986	0.3478
uasGFPval10HandGal4_09_1wf_C11440_30s_300318	0.633	UASGFPVal10HandGal4	9	300318	1	f	control	1.75934	1.76675	0.559747	0.316823				0.616219	0.573698	0.168715	0.294082				0.411768	0.367165	0.168263	0.458275	0.668217	19.7649				0.20465	0.206539	0.0161404	0.0781469	0.332105	10.0278			0.294082	0.497002	77.6632	64.6156	71.1394	50.406	29.7577	40.0819	0.436573
uasGFPval10HandGal4_09_1wf_C11440_30s_300318	0.633	UASGFPVal10HandGal4	9	300318	1	f	control	1.75934	1.76675	0.559747	0.316823				0.616219	0.573698	0.168715	0.294082				0.411768	0.367165	0.168263	0.458275	0.668217	19.7649				0.20465	0.206539	0.0161404	0.0781469	0.332105	10.0278			0.294082	0.497002	77.6632	64.6156	71.1394	50.406	29.7577	40.0819	0.436573
uasGFPval10HandGal4_10_1wf_C11440_30s_300318	0.633	UASGFPVal10HandGal4	10	300318	1	f	control	1.61478	1.6342	0.156747	0.095917				0.625718	0.619566	0.0679745	0.109713				0.451777	0.443624	0.0673336	0.151781	0.722014	21.2335				0.175112	0.175923	0.0074845	0.0425441	0.279858	8.23027			0.109713	0.387607	82.9616	84.881	83.9213	58.291	58.8826	58.5868	0.301884
uasGFPval10HandGal4_10_1wf_C11440_30s_300318	0.633	UASGFPVal10HandGal4	10	300318	1	f	control	1.61478	1.6342	0.156747	0.095917				0.625718	0.619566	0.0679745	0.109713				0.451777	0.443624	0.0673336	0.151781	0.722014	21.2335				0.175112	0.175923	0.0074845	0.0425441	0.279858	8.23027			0.109713	0.387607	82.9616	84.881	83.9213	58.291	58.8826	58.5868	0.301884
uasGFPval10HandGal4_11_1wf_C11440_30s_300318	0.633	UASGFPVal10HandGal4	11	300318	1	f	control	1.94738	1.95125	0.0640603	0.0328303				0.514063	0.512493	0.016925	0.0330249				0.288814	0.290637	0.0141281	0.0486107	0.561826	16.7512				0.225249	0.221853	0.00566145	0.0255189	0.438174	13.0645			0.0330249	0.779911	87.4113	77.8616	82.6364	64.6435	51.9099	58.2767	0.294782
uasGFPval10HandGal4_11_1wf_C11440_30s_300318	0.633	UASGFPVal10HandGal4	11	300318	1	f	control	1.94738	1.95125	0.0640603	0.0328303				0.514063	0.512493	0.016925	0.0330249				0.288814	0.290637	0.0141281	0.0486107	0.561826	16.7512				0.225249	0.221853	0.00566145	0.0255189	0.438174	13.0645			0.0330249	0.779911	87.4113	77.8616	82.6364	64.6435	51.9099	58.2767	0.294782
uasGFPval10HandGal4_12_1wf_C11440_30s_300318	0.633	UASGFPVal10HandGal4	12	300318	1	f	control	1.87551	1.8157	0.412487	0.227178				0.55823	0.550753	0.119071	0.216197				0.376098	0.374768	0.118059	0.315019	0.673734	19.9332				0.181875	0.175948	0.0143398	0.0815003	0.325807	9.82125			0.216197	0.483584	94.3701	102.068	98.2191	61.4043	67.7665	64.5854	0.342436
uasGFPval10HandGal4_12_1wf_C11440_30s_300318	0.633	UASGFPVal10HandGal4	12	300318	1	f	control	1.87551	1.8157	0.412487	0.227178				0.55823	0.550753	0.119071	0.216197				0.376098	0.374768	0.118059	0.315019	0.673734	19.9332				0.181875	0.175948	0.0143398	0.0815003	0.325807	9.82125			0.216197	0.483584	94.3701	102.068	98.2191	61.4043	67.7665	64.5854	0.342436
uasGFPval10HandGal4_13_1wf_C11440_30s_300318	0.633	UASGFPVal10HandGal4	13	300318	1	f	control	1.29707	1.29438	0.104888	0.081033				0.775968	0.780191	0.0623021	0.0798549				0.581325	0.581336	0.0607655	0.104527	0.749162	22.0904				0.194751	0.198853	0.0108779	0.0547033	0.250979	7.5953			0.0798549	0.335013	94.3934	95.6312	95.0123	65.3954	56.337	60.8662	0.359386
uasGFPval10HandGal4_13_1wf_C11440_30s_300318	0.633	UASGFPVal10HandGal4	13	300318	1	f	control	1.29707	1.29438	0.104888	0.081033				0.775968	0.780191	0.0623021	0.0798549				0.581325	0.581336	0.0607655	0.104527	0.749162	22.0904				0.194751	0.198853	0.0108779	0.0547033	0.250979	7.5953			0.0798549	0.335013	94.3934	95.6312	95.0123	65.3954	56.337	60.8662	0.359386
[truncated: 36 more columns]

## Sheet: data_random_GD
File.Name	Scale.Factor	GenoType	ID	Comments	Age	Sex	Type	Heart.Rate.Mean	Heart.Rate.Median	Heart.Rate.Stddev	Heart.Rate.SDonMean				Heart.Period.Mean	Heart.Period.Median	Heart.Period.Stddev	Heart.Period.SDonMean				Diastolic.Interval.Mean	Diastolic.Interval.Median	Diastolic.Interval.Stddev	Diastolic.Interval.SDonMean	DIonHPmean	Diastolic.Interval.TotalTime				Systolic.Interval.Mean	Systolic.Interval.Median	Systolic.Interval.Stddev	Systolic.Interval.SDonMean	SIonHPmean	Systolic.Interval.TotalTime	SIAI		Arrhythmia.Index	SIMean.on.DIMean	1st.Diastolic.Diameter.Vertical	2nd.Diastolic.Diameter.Vertical	Avg.Diastolic.Diameter	1st.Systolic.Diameter.Vertical	2nd.Systolic.Diameter.Vertical	Avg.Systolic.Diameter	Fractional.Shortening	1stDiastolicHorizontal	DiastolicSurfaceArea(mm^2)
HandGal4xCG42594_01_1wf_93003_30s_111717_1	0.74	CG42594xHandGal4	1	111717	1	f	random	1.53889	1.5321	0.0514177	0.0335603				0.650504	0.6527	0.0208784	0.0319878				0.441991	0.4422	0.0210608	0.0476274	0.679459	19.8896				0.208559	0.2105	0.00370542	0.017603	0.320611	9.5937			0.0319878	0.471862	88.1097	89.7355	88.9226	57.7627	46.9944	52.3785	0.410965
HandGal4xCG42594_02_1wf_93003_30s_111717_2	0.74	CG42594xHandGal4	2	111717	1	f	random	3.59133	3.56253	0.0555056	0.0155804				0.278496	0.2807	0.00428006	0.0152478				0.0739519	0.0771008	0.0048986	0.0635351	0.26554	7.9868				0.204575	0.203501	0.00384533	0.0188959	0.734569	21.8895			0.0152478	2.76632	80.4969	71.9667	76.2318	56.0938	46.9069	51.5003	0.324424
HandGal4xCG42594_03_1wf_93003_30s_111717_3	0.74	CG42594xHandGal4	3	111717	1	f	random	2.09377	2.09512	0.0795686	0.0379781				0.478253	0.477301	0.0170754	0.035775				0.275817	0.280699	0.0163031	0.0580806	0.576718	17.3765				0.202402	0.2035	0.00549282	0.0269917	0.42321	12.5489			0.035775	0.733825	91.1282	77.2476	84.1879	57.8905	39.6643	48.7774	0.420613
HandGal4xCG42594_04_1wf_93003_30s_111717_4	0.74	CG42594xHandGal4	4	111717	1	f	random	1.96998	1.92567	0.16622	0.0863177				0.510631	0.5193	0.0383845	0.0739158				0.311214	0.308801	0.0372767	0.120714	0.609469	18.0504				0.199368	0.196501	0.0104225	0.0530407	0.390434	11.7627			0.0739158	0.640613	83.0977	75.8419	79.4698	55.5986	48.1	51.8493	0.34756
HandGal4xCG42594_05_1wf_93003_30s_111717_5	0.74	CG42594xHandGal4	5	111717	1	f	random	2.73083	2.84981	0.388076	0.136176				0.377115	0.350901	0.0857514	0.244375				0.206422	0.1825	0.0844366	0.462666	0.547372	16.5138				0.170301	0.168401	0.00507456	0.0301338	0.45159	13.4538			0.244375	0.825013	95.4715	71.8753	83.6734	65.1242	40.8075	52.9658	0.366993
HandGal4xCG42594_06_1wf_93003_30s_111717_6	0.74	CG42594xHandGal4	6	111717	1	f	random	2.46665	2.4564	0.121569	0.0494909				0.406381	0.4071	0.0198089	0.0486585				0.220156	0.2246	0.0185585	0.0826293	0.541749	16.0714				0.186269	0.189499	0.00632831	0.033395	0.45836	13.7839			0.0486585	0.846076	95.4858	73.3534	84.4196	58.6284	40.0695	49.3489	0.415433
HandGal4xCG42594_07_1wf_93003_30s_111717_7	0.74	CG42594xHandGal4	7	111717	1	f	random	2.11323	2.06526	0.288818	0.139846				0.481031	0.4842	0.0596834	0.123262				0.290232	0.2948	0.0578873	0.196362	0.603355	17.9944				0.192254	0.1895	0.0110895	0.05852	0.399671	11.7275			0.123262	0.662414	105.145	68.8359	86.9905	63.7947	41.5456	52.6701	0.39453
HandGal4xCG42594_08_1wf_93003_30s_111717_8	0.74	CG42594xHandGal4	8	111717	1	f	random	2.43726	2.41487	0.125262	0.0518709				0.411186	0.4141	0.0179973	0.0434613				0.216501	0.2176	0.0130213	0.0598407	0.526529	15.8046				0.194685	0.1965	0.00799881	0.0407064	0.473471	14.212			0.0434613	0.899232	89.1754	64.2565	76.716	58.1548	36.6132	47.384	0.382345
HandGal4xCG42594_01_1wf_93003_30s_112017_1	0.74	CG42594xHandGal4	1	112017	1	f	random	1.42599	1.42491	0.0252462	0.0177177				0.701486	0.7018	0.0124434	0.0177306				0.471893	0.4702	0.0120666	0.0256628	0.672705	19.8195				0.229593	0.2316	0.00433595	0.0187217	0.327295	9.6429			0.0177306	0.486536	110.322	86.9618	98.6419	68.2768	53.5517	60.9142	0.382471
HandGal4xCG42594_02_1wf_93003_30s_112017_2	0.74	CG42594xHandGal4	2	112017	1	f	random	1.22969	1.21788	0.0466911	0.0383381				0.814306	0.8211	0.0305634	0.0372225				0.535131	0.5474	0.033066	0.0604056	0.657162	19.2647				0.279216	0.2807	0.00398674	0.0142029	0.342889	10.331			0.0372225	0.521772	73.5621		73.5621	40.8075		40.8075	0.445265
HandGal4xCG42594_03_1wf_93003_30s_112017_3	0.74	CG42594xHandGal4	3	112017	1	f	random	3.78155	3.85059	0.186729	0.0484938				0.265	0.266699	0.012281	0.046048				0.123905	0.126299	0.0090226	0.0714384	0.467567	14.0013				0.141234	0.1404	0.00502164	0.0357667	0.532957	15.9594			0.046048	1.13985	86.6938	80.197	83.4454	53.8982	53.5312	53.7147	0.356289
HandGal4xCG42594_04_1wf_93003_30s_112017_4	0.74	CG42594xHandGal4	4	112017	1	f	random	2.18196	2.12675	0.339232	0.159507				0.469438	0.470201	0.0780293	0.165949				0.256778	0.2737	0.060271	0.220208	0.54699	16.177				0.212409	0.1966	0.0573155	0.291534	0.452476	13.5942			0.165949	0.827211	99.9438	88.088	94.0159	60.698	45.9039	53.301	0.433065
HandGal4xCG42594_05_1wf_93003_30s_112017_5	0.74	CG42594xHandGal4	5	112017	1	f	random	2.79387	2.74048	0.195282	0.0712582				0.359449	0.364901	0.0233727	0.0640523				0.19008	0.1965	0.0277025	0.14098	0.528808	15.9667				0.169616	0.1684	0.00681356	0.0404606	0.471876	14.0781			0.0640523	0.89234	100.773	82.1433	91.4583	66.0095	41.4664	53.738	0.412432
HandGal4xCG42594_06_1wf_93003_30s_112017_6	0.74	CG42594xHandGal4	6	112017	1	f	random	2.39237	2.37529	0.0587351	0.0247275				0.418224	0.421099	0.0101694	0.0241497				0.21539	0.2176	0.0117856	0.0541619	0.515012	15.2927				0.202843	0.2035	0.00475373	0.0233598	0.485011	14.6047			0.0241497	0.941747	97.7809	70.3156	84.0482	59.4953	37.0296	48.2624	0.425777
HandGal4xCG42594_07_1wf_93003_30s_112017_7	0.74	CG42594xHandGal4	7	112017	1	f	random	1.65739	1.63773	0.116418	0.071085				0.606196	0.6175	0.0425559	0.0689165				0.374682	0.386	0.0454605	0.117773	0.618087	18.3594				0.2306	0.2316	0.00729598	0.0315025	0.380405	11.2994			0.0689165	0.615456	85.642	77.788	81.715	55.0045	46.5965	50.8005	0.378321
HandGal4xCG42594_08_1wf_93003_30s_112017_8	0.74	CG42594xHandGal4	8	112017	1	f	random	1.76614	1.78094	0.420015	0.235839				0.601988	0.561501	0.162178	0.28883				0.369286	0.3439	0.157819	0.45891	0.613444	18.4643				0.231037	0.2316	0.0111625	0.0481973	0.38379	11.3208			0.28883	0.625632	91.7869	76.9209	84.3539	58.4787	46.8777	52.6782	0.375509
HandGal4xCG42594_09_1wf_93003_30s_112017_9	0.74	CG42594xHandGal4	9	112017	1	f	random	1.74481	1.67645	0.18778	0.112011				0.578104	0.596498	0.0533457	0.0894314				0.356033	0.372001	0.0560168	0.150583	0.615863	18.5137				0.219357	0.2176	0.013227	0.0607859	0.379442	11.1872			0.0894314	0.616115	84.4768	85.0517	84.7642	51.8211	49.3642	50.5926	0.403137
HandGal4xCG42594_10_1wf_93003_30s_112017_10	0.74	CG42594xHandGal4	10	112017	1	f	random	2.32705	2.3359	0.0880581	0.0376977				0.430346	0.428101	0.0165589	0.03868				0.247946	0.245701	0.0212312	0.0864106	0.576154	17.3562				0.182875	0.1824	0.00827802	0.0453839	0.424949	12.6184			0.03868	0.737562	90.283		90.283	56.3178		56.3178	0.376208
HandGal4xCG42594_11_1wf_93003_30s_112017_11	0.74	CG42594xHandGal4	11	112017	1	f	random	1.15026	1.14903	0.069109	0.0601455				0.872524	0.8703	0.0526633	0.0605116				0.628744	0.6176	0.0569935	0.0922822	0.720604	21.3773				0.24378	0.2456	0.00969382	0.0394699	0.279396	8.28851			0.0605116	0.387725	96.0804	89.5522	92.8163	57.7958	49.7784	53.7871	0.420499
HandGal4xCG42594_12_1wf_93003_30s_112017_12	0.74	CG42594xHandGal4	12	112017	1	f	random	2.31111	2.26142	0.248243	0.109773				0.436365	0.4422	0.0358143	0.0809911				0.258341	0.266699	0.0368379	0.138126	0.59203	17.5672				0.177987	0.175501	0.00538106	0.0306611	0.407886	12.2811			0.0809911	0.688962	97.2812	80.6736	88.9774	67.5389	39.9874	53.7632	0.395766
HandGal4xCG42594_13_1wf_93003_30s_112017_13	0.74	CG42594xHandGal4	13	112017	1	f	random	1.92033	1.8997	0.242019	0.127399				0.528241	0.5263	0.0607801	0.115485				0.303659	0.294801	0.066599	0.225912	0.574849	17.0049				0.224582	0.224602	0.0154185	0.0686481	0.425151	12.5766			0.115485	0.739587	82.9097	71.841	77.3754	53.3622	46.6259	49.994	0.353877
HandGal4xCG42594_14_1wf_93003_30s_112017_14	0.74	CG42594xHandGal4	14	112017	1	f	random	2.44148	2.3753	0.143865	0.0605673				0.41066	0.421099	0.0230303	0.0546911				0.212013	0.2176	0.0218446	0.100389	0.516273	15.2649				0.198618	0.196501	0.00450215	0.0229116	0.483655	14.4991			0.0546911	0.93682	92.5266	89.0494	90.788	51.8053	44.4986	48.1519	0.469623
HandGal4xCG42594_15_1wf_93003_30s_112017_15	0.74	CG42594xHandGal4	15	112017	1	f	random	3.2206	3.23834	0.108459	0.0334921				0.310846	0.3088	0.0105721	0.0342362				0.112007	0.1123	0.0102765	0.0915098	0.360331	10.8647				0.198988	0.196501	0.00564592	0.0287323	0.640152	19.1029			0.0342362	1.77657	99.1848	65.8974	82.5411	69.5639	46.6435	58.1037	0.296064
HandGal4xCG42594_16_1wf_93003_30s_112017_16	0.74	CG42594xHandGal4	16	112017	1	f	random	1.66044	1.657	0.0642033	0.0387467				0.603129	0.6035	0.0228781	0.037909				0.383125	0.379001	0.0239022	0.0630664	0.635229	18.7731				0.219954	0.2176	0.00407182	0.0187124	0.364688	10.9977			0.037909	0.574106	104.34	85.3057	94.8228	69.5639	49.8499	59.7069	0.370332
HandGal4xCG42594_17_1wf_93003_30s_112017_17	0.74	CG42594xHandGal4	17	112017	1	f	random	1.61522	1.657	0.206585	0.124674				0.631187	0.603499	0.101762	0.16862				0.424085	0.393101	0.100075	0.254578	0.671885	19.932				0.207102	0.2036	0.00609519	0.0299371	0.328115	9.7338			0.16862	0.48835	77.7035	69.5639	73.6337	44.4062	38.4871	41.4466	0.437124
HandGal4xCG42594_18_1wf_93003_30s_112017_18	0.74	CG42594xHandGal4	18	112017	1	f	random	2.69602	2.59068	0.328367	0.12675				0.375206	0.386	0.0389455	0.100895				0.210465	0.2246	0.0386781	0.172209	0.560932	16.8372				0.164741	0.1684	0.0114167	0.0677955	0.439068	13.1793			0.100895	0.782749	85.129	80.7821	82.9555	54.805	48.191	51.498	0.37921
HandGal4xCG42594_19_1wf_93003_30s_112017_19	0.74	CG42594xHandGal4	19	112017	1	f	random	2.89729	2.90782	0.145539	0.0500508				0.34601	0.343901	0.0173522	0.050457				0.177554	0.175501	0.0185728	0.105828	0.513146	15.4472				0.168677	0.1684	0.0129089	0.076656	0.48749	14.5062			0.050457	0.950002	111.742	113.101	112.422	82.1433	63.2516	72.6975	0.353352
HandGal4xCG42594_20_1wf_93003_30s_112017_20	0.74	CG42594xHandGal4	20	112017	1	f	random	2.28243	2.22668	0.132962	0.0597129				0.439315	0.4491	0.0244581	0.0544602				0.263288	0.266701	0.0190866	0.0715654	0.599315	17.9036				0.175966	0.175499	0.0122982	0.0700758	0.400547	11.9657			0.0544602	0.668341	95.5317	83.7018	89.6167	65.1872	53.2851	59.2362	0.339005
HandGal4xCG42594_21_1wf_93003_30s_112017_21	0.74	CG42594xHandGal4	21	112017	1	f	random	3.15137	3.0979	0.158061	0.0510219				0.317982	0.3228	0.0147975	0.0458413				0.15896	0.1614	0.0150234	0.0930815	0.499901	14.9422				0.159022	0.1614	0.00409162	0.0253508	0.500099	14.9481			0.0458413	1.00039	74.9193		74.9193	40.7269		40.7269	0.45639
HandGal4xCG42594_22_1wf_93003_30s_112017_22	0.74	CG42594xHandGal4	22	112017	1	f	random	1.74467	1.67616	0.413932	0.246952				0.59898	0.5965	0.113486	0.190254				0.401324	0.393001	0.109786	0.279352	0.670013	19.6649				0.197492	0.1965	0.00904065	0.0460083	0.329714	9.87461			0.190254	0.492101	82.8932	102.903	92.8979	55.5049	72.5804	64.0427	0.310612
HandGal4xCG5003_01_1wf_93001_30s_032817,1	1.1627	CG5003xHandGal4	1	32817.1	1	f	random	1.0997	1.10339	0.127737	0.115768				0.922022	0.9137	0.1115	0.122032				0.612369	0.6092	0.111628	0.183237	0.664159	19.5958				0.309653	0.311998	0.00811231	0.0260011	0.335841	9.9089			0.122032	0.505664	118.687	134.698	126.692	76.8174	77.9963	77.4069	0.389016
HandGal4xCG5003_10_1wf_93001_30s_032817,10	1.1627	CG5003xHandGal4	10	32817.1	1	f	random	1.47425	1.46327	0.0268396	0.0183422				0.678495	0.683399	0.0122206	0.0178821				0.436398	0.4382	0.0113491	0.0258993	0.643184	19.2015				0.242098	0.2451	0.0047297	0.019297	0.356816	10.6523			0.0178821	0.554764	104.643		104.643	62.9578		62.9578	0.398356
HandGal4xCG5003_11_1wf_93001_30s_032817,11	1.1627	CG5003xHandGal4	11	32817.1	1	f	random	1.30454	1.30702	0.0394701	0.0301986				0.767253	0.7651	0.0232684	0.0304122				0.515595	0.5125	0.0224518	0.0438084	0.672002	20.1082				0.250797	0.252501	0.00397242	0.0157323	0.326877	9.5303			0.0304122	0.486423	123.164		123.164	93.1975		93.1975	0.243305
HandGal4xCG5003_12_1wf_93001_30s_032817,12	1.1627	CG5003xHandGal4	12	32817.1	1	f	random	1.45901	1.46327	0.0278556	0.0190365				0.68564	0.6834	0.0130633	0.0191152				0.428293	0.430799	0.0148137	0.0343864	0.624662	18.8449				0.256195	0.252601	0.00516779	0.0204583	0.373659	11.0164			0.0191152	0.598178	92.0371	75.145	83.591	75.7988	56.003	65.9009	0.211627
HandGal4xCG5003_13_1wf_93001_30s_032817,13	1.1627	CG5003xHandGal4	13	32817.1	1	f	random	1.27955	1.24657	0.105763	0.0848434				0.785581	0.8022	0.0548209	0.0683382				0.544268	0.5497	0.0517861	0.0942079	0.692822	20.1379				0.241021	0.2377	0.0151023	0.0635353	0.306806	9.1588			0.0683382	0.442836	137.671	138.381	138.026	102.95	76.9581	89.954	0.348281
HandGal4xCG5003_14_1wf_93001_30s_032817,14	1.1627	CG5003xHandGal4	14	32817.1	1	f	random	1.83069	1.844	0.0389989	0.0211491				0.546462	0.5423	0.0117998	0.0217588				0.328224	0.326899	0.0110677	0.0338566	0.600635	17.7241				0.218296	0.215401	0.00464115	0.0215466	0.399472	11.788			0.0217588	0.665083	118.601	96.6161	107.609	76.7734	62.9578	69.8656	0.350743
HandGal4xCG5003_15_1wf_93001_30s_032817,15	1.1627	CG5003xHandGal4	15	32817.2	1	f	random	1.34378	1.34626	0.0365745	0.0271675				0.744723	0.7428	0.0204667	0.0275535				0.46389	0.4606	0.0200022	0.0434264	0.622903	18.5556				0.280939	0.282299	0.00395872	0.0140231	0.377239	10.9566			0.0275535	0.605615	104.927	105.901	105.414	66.9538	69.4999	68.2268	0.352774
HandGal4xCG5003_16_1wf_93001_30s_032817,16	1.1627	CG5003xHandGal4	16	32817.2	1	f	random	1.28464	1.22384	0.184822	0.151018				0.7906	0.817101	0.09456	0.115726				0.540849	0.564501	0.0940911	0.16668	0.684099	20.0114				0.249751	0.2452	0.00778505	0.0317498	0.315901	9.2408			0.115726	0.461777	100.235	117.456	108.845	59.4002	77.979	68.6896	0.368926
HandGal4xCG5003_02_1wf_93001_30s_032817,2	1.1627	CG5003xHandGal4	2	32817.2	1	f	random	1.4327	1.41723	0.0397933	0.0280782				0.698432	0.705601	0.0189646	0.0268772				0.422888	0.430799	0.026989	0.0626487	0.605482	17.7613				0.275538	0.2748	0.0203094	0.0739062	0.39451	11.5726			0.0268772	0.651563	107.429	93.4799	100.454	68.0453	60.8615	64.4534	0.358381
HandGal4xCG5003_03_1wf_93001_30s_032817,3	1.1627	CG5003xHandGal4	3	32817.3	1	f	random	1.48783	1.47929	0.0375552	0.0253873				0.672509	0.676	0.016266	0.0240621				0.440791	0.4457	0.0165734	0.0371851	0.655442	19.3948				0.231459	0.2303	0.00295199	0.012818	0.344172	10.1842			0.0240621	0.525099	135.996		135.996	102.456		102.456	0.246624
HandGal4xCG5003_04_1wf_93001_30s_032817,4	1.1627	CG5003xHandGal4	4	32817.4	1	f	random	1.22005	1.22384	0.0255565	0.0208822				0.819989	0.817101	0.0171533	0.0209929				0.565147	0.5646	0.0170224	0.0301495	0.689213	20.3453				0.254842	0.2526	0.00665742	0.0263556	0.310787	9.1743			0.0209929	0.45093	122.106	112.974	117.54	84.9487	79.7531	82.3509	0.299377
HandGal4xCG5003_05_1wf_93001_30s_032817,5	1.1627	CG5003xHandGal4	5	32817.5	1	f	random	0.751731	0.782718	0.223905	0.286061				1.71984	1.2776	1.65795	1.29771				1.42839	0.9879	1.65515	1.67542	0.830535	24.2826				0.291453	0.2897	0.00719742	0.0248444	0.169465	4.9547			1.29771	0.204043	113.927	118.738	116.332	83.5285	69.9169	76.7227	0.340487
HandGal4xCG5003_06_1wf_93001_30s_032817,6	1.1627	CG5003xHandGal4	6	32817.6	1	f	random	1.6907	1.68265	0.0586556	0.0348591				0.592133	0.594301	0.0193976	0.0326393				0.346406	0.3492	0.0183321	0.0524975	0.585015	16.9739				0.245566	0.2451	0.00546794	0.022309	0.414714	12.2783			0.0326393	0.708896	116.363	120.439	118.401	82.6826	75.5755	79.1291	0.331686
HandGal4xCG5003_07_1wf_93001_30s_032817,7	1.1627	CG5003xHandGal4	7	32817.7	1	f	random	1.60086	1.58378	0.0574748	0.0362895				0.625389	0.631399	0.0220426	0.0349108				0.385791	0.3937	0.0220992	0.0561322	0.616882	18.1322				0.239598	0.2377	0.00405424	0.0170561	0.383118	11.2611			0.0349108	0.621056	108.885	95.3414	102.113	75.145	65.1527	70.1488	0.313028
HandGal4xCG5003_08_1wf_93001_30s_032817,8	1.1627	CG5003xHandGal4	8	32817.8	1	f	random	1.22514	1.22384	0.0215468	0.0176059				0.816481	0.8171	0.0142742	0.0174693				0.566189	0.5646	0.0147293	0.0260881	0.693451	20.3828				0.250292	0.252501	0.00406127	0.0160842	0.306549	9.0105			0.0174693	0.442064	118.504		118.504	72.8429		72.8429	0.385313
HandGal4xCG5003_09_1wf_93001_30s_032817,9	1.1627	CG5003xHandGal4	9	32817.9	1	f	random	1.58144	1.58378	0.0274594	0.0173379				0.632526	0.6314	0.0111271	0.0176229				0.394985	0.3937	0.0108503	0.0275598	0.624456	18.1693				0.237543	0.2377	0.00286154	0.0120384	0.375546	11.1645			0.0176229	0.601397	117.312		117.312	86.1497	69.3149	77.7323	0.337387
HandGal4xCG5003_01_1wf_93001_30s_041217,1	1.1627	CG5003xHandGal4	1	41217.1	1	f	random	0.808522	0.815594	0.0317892	0.0389768				1.23872	1.2262	0.0511203	0.04169				0.931359	0.9215	0.0498725	0.054121	0.751871	20.4899				0.307248	0.304701	0.00430489	0.0141282	0.248036	7.0667			0.04169	0.329892	121.862	109.794	115.828	80.7637	63.9591	72.3614	0.375267
HandGal4xCG5003_02_1wf_93001_30s_041217,2	1.1627	CG5003xHandGal4	2	41217.2	1	f	random	0.624284	0.607165	0.115165	0.189676				1.65291	1.6615	0.285651	0.171923				1.32959	1.3423	0.288325	0.214799	0.804394	21.2734				0.322653	0.3193	0.00859486	0.0269178	0.195203	5.4851			0.171923	0.242672	125.765	117.525	121.645	70.9628	89.5958	80.2793	0.340052
HandGal4xCG5003_01_1wf_93000_30s_050817,1	1.1627	CG5003xHandGal4	1	50817.1	1	f	random	1.35265	1.34445	0.0438687	0.0326295				0.740026	0.743799	0.0234052	0.0314671				0.468745	0.4713	0.0216647	0.0459679	0.633418	18.7498				0.270969	0.272499	0.00372692	0.0136768	0.366162	10.5678			0.0314671	0.578073	163.978	149.116	156.547	108.156	91.1664	99.6612	0.363378
HandGal4xCG5003_02_1wf_93000_30s_050817,2	1.1627	CG5003xHandGal4	2	50817.2	1	f	random	1.16249	1.1605	0.0339343	0.0292411				0.860961	0.861599	0.0252885	0.0293507				0.561036	0.5597	0.023283	0.0415991	0.65164	18.5142				0.299768	0.3019	0.00471686	0.0156239	0.348178	10.1921			0.0293507	0.534311	179.512		179.512	109.319		109.319	0.391024
HandGal4xCG5003_03_1wf_93000_30s_050817,3	1.1627	CG5003xHandGal4	3	50817.3	1	f	random	1.20772	1.21227	0.0263359	0.0217245				0.828386	0.8248	0.0180876	0.0219297				0.520983	0.5228	0.016361	0.031295	0.628913	18.2344				0.30725	0.309299	0.00695016	0.0224706	0.370902	11.061			0.0219297	0.58975	215.827	189.933	202.88	134.602	118.897	126.75	0.375249
HandGal4xCG5003_04_1wf_93000_30s_050817,4	1.1627	CG5003xHandGal4	4	50817.4	1	f	random	2.1576	2.15564	0.0489818	0.0227226				0.463722	0.4639	0.0107338	0.0231381				0.22326	0.2209	0.0108966	0.0493284	0.481453	14.0654				0.240386	0.243	0.00457781	0.0188387	0.518384	15.3847			0.0231381	1.07671	188.472	205.496	196.984	128.635	107.177	117.906	0.401445
HandGal4xCG5003_05_1wf_93000_30s_050817,5	1.1627	CG5003xHandGal4	5	50817.5	1	f	random	2.28155	2.30096	0.0399188	0.0173487				0.438403	0.4417	0.00746123	0.0168921				0.221813	0.220901	0.00597489	0.0270479	0.505958	14.8615				0.216531	0.2136	0.00465331	0.0217852	0.493909	14.5076			0.0168921	0.976187	167.578	190.856	179.217	116.601	118.007	117.304	0.345465
HandGal4xCG5003_06_1wf_93000_30s_050817,6	1.1627	CG5003xHandGal4	6	50817.6	1	f	random	1.33436	1.22324	0.325112	0.265779				0.775249	0.817501	0.122313	0.149619				0.525843	0.567101	0.121631	0.214478	0.67829	19.4562				0.249432	0.2504	0.00431488	0.017232	0.321744	9.4784			0.149619	0.474346	218.529	157.656	188.093	132.594	90.5489	111.571	0.406828
HandGal4xCG5003_07_1wf_93000_30s_050817,7	1.1627	CG5003xHandGal4	7	50817.7	1	f	random	1.20312	1.21241	0.0323034	0.0266439				0.831738	0.8248	0.023157	0.0280759				0.579663	0.5744	0.0228554	0.0397901	0.696929	20.2882				0.251457	0.250401	0.003736	0.0149201	0.302327	8.801			0.0280759	0.433799	179.09	166.85	172.97	108.156	100.161	104.159	0.397823
HandGal4xCG5003_01_1wf_93001_30s_051617,1	1.1627	CG5003xHandGal4	1	51617.1	1	f	random	1.78914	2.09425	0.679612	0.324514				0.681167	0.477501	0.447839	0.937882				0.392366	0.2057	0.425899	2.07049	0.57602	17.2641				0.283265	0.2719	0.0210626	0.0774644	0.415853	12.1804			0.937882	0.721942	129.582	129.582	129.582	94.358	89.5354	91.9467	0.290438
HandGal4xCG5003_02_1wf_93001_30s_051617,2	1.1627	CG5003xHandGal4	2	51617.2	1	f	random	1.91867	1.91718	0.0531203	0.0277075				0.521598	0.5216	0.0145637	0.0279212				0.325609	0.3233	0.0143552	0.0444022	0.624252	18.2341				0.195989	0.1983	0.00413932	0.020874	0.375748	10.9754			0.0279212	0.601916	105.351	105.191	105.271	66.2841	63.6094	64.9467	0.383051
HandGal4xCG5003_03_1wf_93001_30s_051617,3	1.1627	CG5003xHandGal4	3	51617.3	1	f	random	2.01261	2.002	0.0614622	0.0307004				0.497152	0.499498	0.0152788	0.0305883				0.297597	0.2939	0.0160603	0.0546455	0.598603	17.5582				0.200219	0.1984	0.0036814	0.0185554	0.402731	11.8129			0.0305883	0.672785	102.74	102.159	102.449	63.0544	61.5682	62.3113	0.391784
HandGal4xGDControl_01_1wf_93003_30s_111717_1	0.74	GDControlxHandGal4	1	111717	1	f	control	1.87183	1.87477	0.0428555	0.0228591				0.534512	0.533401	0.0122733	0.0230095				0.333752	0.336601	0.0119117	0.0353882	0.624404	18.6901				0.200761	0.203499	0.00438782	0.0215619	0.375596	11.2426			0.0230095	0.601526	97.1206	81.4	89.2603	57.0568	53.3006	55.1787	0.381823
HandGal4xGDControl_01_1wf_93003_30s_112017_1	0.74	GDControlxHandGal4	1	112017	1	f	control	2.00922	1.87512	0.708085	0.377622				0.569819	0.5334	0.230104	0.431391				0.373444	0.336899	0.23026	0.683468	0.655373	19.4191				0.196113	0.196501	0.0088947	0.0452655	0.344168	10.394			0.431391	0.525148	101.391	97.1685	99.2797	68.084	53.4083	60.7462	0.388131
HandGal4xGDControl_01_1wf_93003_30s_112217_1	0.74	GDControlxHandGal4	1	112217	1	f	control	1.98702	1.97902	0.0461036	0.0232962				0.503522	0.5053	0.0113753	0.022512				0.295358	0.2948	0.0113721	0.0385757	0.586583	17.4261				0.208203	0.2105	0.00423356	0.0201119	0.413494	12.4922			0.022512	0.704919	97.4583	94.9164	96.1873	58.3991	53.6946	56.0469	0.417316
HandGal4xGDControl_02_1wf_93003_30s_112017_2	0.74	GDControlxHandGal4	2	112017	1	f	control	2.09925	2.09556	0.0624189	0.0297863				0.476781	0.4773	0.0142036	0.0297583				0.29624	0.2948	0.0144533	0.0490274	0.621335	18.3669				0.180459	0.182402	0.00412462	0.0226129	0.378494	11.3689			0.0297583	0.609163	82.2233	71.7953	77.0093	53.3622	42.2384	47.8003	0.379292
HandGal4xGDControl_02_1wf_93003_30s_112217_2	0.74	GDControlxHandGal4	2	112217	1	f	control	2.2247	2.1925	0.229862	0.10484				0.453945	0.4561	0.0441263	0.0967468				0.233933	0.231602	0.0446057	0.192597	0.515333	15.4396				0.220012	0.2176	0.00842374	0.038712	0.484667	14.5208			0.0967468	0.940491	108.043	85.84	96.9413	75.5126	51.8053	63.659	0.343324
HandGal4xGDControl_03_1wf_93003_30s_111717_3	0.74	GDControlxHandGal4	3	111717	1	f	control	1.58721	1.58303	0.0539239	0.0340637				0.630743	0.6317	0.020937	0.033144				0.409002	0.407101	0.0234609	0.0576293	0.648445	19.2231				0.221946	0.2246	0.0110138	0.0490376	0.35188	10.6534			0.033144	0.542652	62.0586	88.5839	75.3213	60.3951	37.1845	48.7898	0.352244
HandGal4xGDControl_03_1wf_93003_30s_112017_3	0.74	GDControlxHandGal4	3	112017	1	f	control	1.93468	1.92567	0.0528797	0.0274605				0.517249	0.5193	0.0138147	0.0266025				0.345983	0.343901	0.0138137	0.0401676	0.668889	19.721				0.171219	0.1685	0.00437571	0.0259686	0.331018	9.9307			0.0266025	0.494877	91.8077	85.9197	88.8637	60.0541	48.2421	54.1481	0.390661
HandGal4xGDControl_03_1wf_93003_30s_112217_3	0.74	GDControlxHandGal4	3	112217	1	f	control	1.76327	1.67645	0.354619	0.21153				0.58058	0.5965	0.0720918	0.120858				0.388196	0.407	0.0748229	0.18384	0.668635	19.798				0.192329	0.1895	0.00523524	0.0276265	0.33127	10.0011			0.120858	0.495442	96.9513	76.2775	86.6144	56.98	44.4062	50.6931	0.414727
HandGal4xGDControl_04_1wf_93003_30s_111717_4	0.74	GDControlxHandGal4	4	111717	1	f	control	1.61003	1.45391	0.444693	0.30586				0.648324	0.687799	0.114255	0.166117				0.434811	0.4842	0.129682	0.267828	0.670669	19.5665				0.213448	0.203501	0.0665773	0.32716	0.32923	9.8186			0.166117	0.490898	71.1786	75.7118	73.4452	46.9069	44.7011	45.804	0.376351
HandGal4xGDControl_04_1wf_93003_30s_112017_4	0.74	GDControlxHandGal4	4	112017	1	f	control	2.82773	2.84981	0.0537929	0.0188759				0.353748	0.350901	0.00676378	0.0192755				0.182219	0.182401	0.00662635	0.0363285	0.51511	15.3064				0.171493	0.1685	0.00458869	0.0272326	0.484789	14.5769			0.0192755	0.941137	83.6331		83.6331	59.2		59.2	0.292146
HandGal4xGDControl_04_1wf_93003_30s_112217_4	0.74	GDControlxHandGal4	4	112217	1	f	control	1.7301	1.73762	0.0593225	0.0341401				0.578653	0.5755	0.0194753	0.0338407				0.382565	0.386	0.0193295	0.0500765	0.66113	19.5108				0.196088	0.1965	0.00219833	0.0111875	0.33887	10.0005			0.0338407	0.512562	76.992	66.6657	71.8289	50.407	37.74	44.0735	0.38641
HandGal4xGDControl_05_1wf_93003_30s_111717_5	0.74	GDControlxHandGal4	5	111717	1	f	control	2.10507	2.09556	0.0747035	0.0356486				0.475565	0.4772	0.0150315	0.0314993				0.280611	0.280701	0.0142987	0.0509394	0.590058	17.6785				0.194954	0.1965	0.00413446	0.0210405	0.409942	12.2821			0.0314993	0.694748	98.5201	79.9337	89.2269	55.8148	39.96	47.8874	0.463307
HandGal4xGDControl_05_1wf_93003_30s_112017_5	0.74	GDControlxHandGal4	5	112017	1	f	control	2.24	2.22667	0.0763494	0.0342886				0.446926	0.4491	0.015084	0.0335872				0.270627	0.2737	0.0154794	0.0565563	0.605531	17.8614				0.176182	0.1755	0.0037227	0.021212	0.394209	11.8042			0.0335872	0.651014	72.0237		72.0237	43.7602		43.7602	0.392419
HandGal4xGDControl_05_1wf_93003_30s_112217_5	0.74	GDControlxHandGal4	5	112217	1	f	control	2.32684	2.3359	0.37633	0.161107				0.44141	0.4281	0.0738775	0.172571				0.268155	0.245601	0.0795307	0.323821	0.607496	17.9664				0.173255	0.1754	0.00918237	0.0523511	0.392504	11.6081			0.172571	0.6461	98.4645	82.17	90.3172	63.64	48.84	56.24	0.377306
HandGal4xGDControl_06_1wf_93003_30s_111717_6	0.74	GDControlxHandGal4	6	111717	1	f	control	3.20285	3.16656	0.133553	0.042176				0.312716	0.3158	0.0127177	0.0402714				0.148771	0.154301	0.0143061	0.0927157	0.475738	14.282				0.164197	0.1614	0.00934973	0.057929	0.525067	15.7629			0.0402714	1.10369	96.9654	81.521	89.2432	56.4587	49.7784	53.1185	0.404789
HandGal4xGDControl_06_1wf_93003_30s_112017_6	0.74	GDControlxHandGal4	6	112017	1	f	control	1.87446	1.82682	0.182923	0.100132				0.537716	0.5474	0.0463629	0.0846966				0.366467	0.378901	0.0463032	0.122204	0.681525	20.1557				0.1712	0.1685	0.00456359	0.0270835	0.318383	9.5872			0.0846966	0.467163	97.6828	77.0169	87.3499	58.4647	48.9296	53.6971	0.385263
HandGal4xGDControl_06_1wf_93003_30s_112217_6	0.74	GDControlxHandGal4	6	112217	1	f	control	2.38482	2.37473	0.0523966	0.0220642				0.419507	0.4211	0.00889232	0.0211169				0.261652	0.259701	0.00949594	0.0365649	0.623713	18.5773				0.157906	0.1613	0.00488591	0.0302908	0.376407	11.3692			0.0211169	0.603494	93.2429	67.0956	80.1693	64.3843	41.7625	53.0734	0.337984
HandGal4xGDControl_07_1wf_93003_30s_111717_7	0.74	GDControlxHandGal4	7	111717	1	f	control	3.15484	3.0979	0.21189	0.068398				0.318283	0.3228	0.0207861	0.0643932				0.160967	0.1614	0.0203963	0.126371	0.505736	15.1309				0.157316	0.1544	0.00635436	0.0411552	0.494264	14.7877			0.0643932	0.977318	98.42	89.6164	94.0182	70.3039	55.6232	62.9635	0.330305
HandGal4xGDControl_07_1wf_93003_30s_112017_7	0.74	GDControlxHandGal4	7	112017	1	f	control	1.83037	1.82682	0.0429745	0.0235243				0.546635	0.5474	0.0128056	0.0233936				0.378322	0.379	0.0112563	0.0297	0.692093	20.4294				0.168316	0.1684	0.00606937	0.0360414	0.307914	9.2574			0.0233936	0.444902	100.034	77.088	88.5611	63.6572	45.1643	54.4107	0.385614
HandGal4xGDControl_07_1wf_93003_30s_112217_7	0.74	GDControlxHandGal4	7	112217	1	f	control	1.28804	1.2837	0.0567509	0.044209				0.777876	0.779	0.0342665	0.0439878				0.563129	0.5615	0.0351734	0.0626418	0.723932	21.3989				0.215147	0.217499	0.00611826	0.0281301	0.276583	8.1756			0.0439878	0.382057	91.023	84.36	87.6915	57.7247	50.32	54.0224	0.38395
HandGal4xGDControl_08_1wf_93003_30s_111717_8	0.74	GDControlxHandGal4	8	111717	1	f	control	2.23198	2.1589	0.344354	0.159505				0.457059	0.470201	0.0618252	0.131487				0.30212	0.3159	0.0682421	0.216025	0.661009	19.3357				0.154929	0.1544	0.00926578	0.0600116	0.33897	10.0704			0.131487	0.512807	105.083	86.5926	95.8376	66.6041	45.4362	56.0202	0.415468
HandGal4xGDControl_08_1wf_93003_30s_112017_8	0.74	GDControlxHandGal4	8	112017	1	f	control	1.86795	1.87476	0.0551123	0.0293969				0.535804	0.5334	0.0157443	0.0295169				0.356913	0.3579	0.0153182	0.0428001	0.666126	19.6302				0.178955	0.1824	0.00491458	0.026944	0.333994	10.0215			0.0295169	0.501398	95.5059	82.17	88.8379	61.4245	46.6259	54.0252	0.391868
HandGal4xGDControl_08_1wf_93003_30s_112217_8	0.74	GDControlxHandGal4	8	112217	1	f	control	3.31005	3.31346	0.0778895	0.023507				0.302283	0.3018	0.00733307	0.0242978				0.154048	0.1544	0.00849166	0.0549979	0.509617	15.2508				0.148227	0.1474	0.00358964	0.0243531	0.49036	14.6745			0.0242978	0.962212	94.8182	71.1016	82.9599	58.0511	46.7666	52.4088	0.368263
HandGal4xGDControl_09_1wf_93003_30s_111717_9	0.74	GDControlxHandGal4	9	111717	1	f	control	2.73051	2.79329	0.139404	0.0499066				0.367023	0.358	0.0196154	0.0547917				0.194343	0.189499	0.0172315	0.0909318	0.529512	15.7418				0.172715	0.1754	0.00435172	0.0248103	0.470582	14.1626			0.0547917	0.888709	100.651	82.3032	91.477	75.48	52.3259	63.903	0.301432
HandGal4xGDControl_09_1wf_93003_30s_112017_9	0.74	GDControlxHandGal4	9	112017	1	f	control	1.73192	1.67644	0.272118	0.162319				0.587184	0.5966	0.0650198	0.108984				0.424386	0.435101	0.0654975	0.150534	0.722748	21.6437				0.162798	0.1614	0.00652752	0.0404432	0.277252	8.3027			0.108984	0.383608	85.8528	76.9636	81.4082	56.2595	43.6663	49.9629	0.386267
HandGal4xGDControl_09_1wf_93003_30s_112217_9	0.74	GDControlxHandGal4	9	112217	1	f	control	2.04223	2.12676	0.188661	0.0887084				0.493142	0.4772	0.0450983	0.0945062				0.315942	0.3018	0.0433963	0.143792	0.640671	18.9565				0.177285	0.175499	0.00567327	0.0323265	0.359502	10.8144			0.0945062	0.561133	101.599	87.3482	94.4734	59.3663	45.1643	52.2653	0.446773
HandGal4xGDControl_10_1wf_93003_30s_111717_10	0.74	GDControlxHandGal4	10	111717	1	f	control	2.92055	3.03214	0.313864	0.103512				0.346501	0.329801	0.0442916	0.134298				0.20127	0.1825	0.0430924	0.236123	0.580864	17.5105				0.14591	0.1474	0.00490881	0.0333026	0.421097	12.5483			0.134298	0.724948	108.346	90.2254	99.2858	63.9875	46.029	55.0082	0.445961
HandGal4xGDControl_10_1wf_93003_30s_112017_10	0.74	GDControlxHandGal4	10	112017	1	f	control	2.44281	2.41488	0.149824	0.062042				0.410757	0.4141	0.0234266	0.0565724				0.254997	0.259699	0.0237388	0.091409	0.620798	18.3598				0.155933	0.1544	0.00464095	0.030058	0.379623	11.3831			0.0565724	0.611508	100.122	80.2926	90.2072	62.2304	47.7572	54.9938	0.390361
HandGal4xGDControl_10_1wf_93003_30s_112217_10	0.74	GDControlxHandGal4	10	112217	1	f	control	1.94579	1.9516	0.0423103	0.0216798				0.514172	0.5124	0.0113322	0.0221159				0.353941	0.357899	0.0106146	0.0296581	0.688372	20.5286				0.160924	0.1614	0.00503928	0.0312223	0.312977	9.3336			0.0221159	0.454663	90.3073	81.4034	85.8553	56.9992	47.3658	52.1825	0.392204
HandGal4xGDControl_11_1wf_93003_30s_111717_11	0.74	GDControlxHandGal4	11	111717	1	f	control	2.08662	2.03542	0.179564	0.0882194				0.481952	0.4912	0.0343257	0.0698812				0.278798	0.2878	0.0320381	0.111321	0.578477	17.2855				0.203192	0.203501	0.00822673	0.040426	0.421602	12.5979			0.0698812	0.728813	105.519	96.3024	100.911	64.7236	45.9754	55.3495	0.451502
HandGal4xGDControl_11_1wf_93003_30s_112017_11	0.74	GDControlxHandGal4	11	112017	1	f	control	1.29536	1.2837	0.0520933	0.0405807				0.773105	0.779	0.0291141	0.0373737				0.578631	0.5825	0.0286936	0.0492593	0.748451	21.988				0.194526	0.1965	0.00405035	0.0206125	0.251616	7.5865			0.0373737	0.336182	94.0062	87.3984	90.7023	67.3563	50.3689	58.8626	0.351035
HandGal4xGDControl_11_1wf_93003_30s_112217_11	0.74	GDControlxHandGal4	11	112217	1	f	control	2.81877	2.68889	0.380754	0.141603				0.359194	0.3719	0.0373752	0.100498				0.189578	0.2035	0.0368909	0.181282	0.527788	15.735				0.169616	0.168499	0.00420562	0.0249593	0.472212	14.0781			0.100498	0.8947	96.6005	74	85.3002	62.8477	42.9455	52.8966	0.379877
HandGal4xGDControl_12_1wf_93003_30s_111717_12	0.74	GDControlxHandGal4	12	111717	1	f	control	2.28048	2.29779	0.0497994	0.0216727				0.438688	0.4352	0.00967469	0.0222305				0.273182	0.2737	0.00870584	0.031808	0.622725	18.3032				0.165446	0.161501	0.00649186	0.040197	0.377137	11.2503			0.0222305	0.605624	85.891	79.3493	82.6201	54.78	42.2837	48.5319	0.41259
HandGal4xGDControl_12_1wf_93003_30s_112017_12	0.74	GDControlxHandGal4	12	112017	1	f	control	1.84712	1.42491	0.985975	0.691956				0.669398	0.701799	0.337916	0.4815				0.351721	0.3368	0.216199	0.641922	0.525429	15.124				0.321205	0.1895	0.3574	1.88602	0.479841	13.8118			0.4815	0.913237	79.9748	72.1604	76.0676	48.8624	41.0283	44.9454	0.409139
HandGal4xGDControl_12_1wf_93003_30s_112217_12	0.74	GDControlxHandGal4	12	112217	1	f	control	2.23715	2.22667	0.0228831	0.0102768				0.447035	0.4491	0.00454839	0.0101278				0.283346	0.2808	0.00545167	0.0194148	0.633835	18.9842				0.163719	0.1614	0.00420958	0.0260817	0.366234	10.9692			0.0101278	0.577806	82.2233	78.454	80.3386	55.7412	51.0814	53.4113	0.335173
HandGal4xGDControl_13_1wf_93003_30s_111717_13	0.74	GDControlxHandGal4	13	111717	1	f	control	2.43375	2.41546	0.0516264	0.0213733				0.411051	0.414	0.00869048	0.0209915				0.230328	0.2316	0.00743902	0.0321202	0.560338	16.5836				0.180651	0.182499	0.00443349	0.0242933	0.439485	13.1875			0.0209915	0.784321	97.6828	87.3702	92.5265	63.64	59.274	61.457	0.33579
HandGal4xGDControl_13_1wf_93003_30s_112017_13	0.74	GDControlxHandGal4	13	112017	1	f	control	2.69987	2.68889	0.0418413	0.0155608				0.37047	0.371901	0.00570134	0.0153303				0.217481	0.2176	0.00557181	0.0256058	0.587042	17.616				0.153007	0.1544	0.00312509	0.0202402	0.413009	12.3936			0.0153303	0.703542	96.2711	80.877	88.574	60.698	46.7139	53.706	0.39366
HandGal4xGDControl_13_1wf_93003_30s_112217_13	0.74	GDControlxHandGal4	13	112217	1	f	control	2.60382	2.59068	0.732745	0.282839				0.41852	0.386	0.12975	0.336139				0.238911	0.2036	0.131015	0.643493	0.570848	16.9627				0.17955	0.175499	0.0379033	0.215974	0.429012	12.9276			0.336139	0.751534	91.7869	59.2416	75.5142	56.2595	38.5937	47.4266	0.371952
HandGal4xGDControl_14_1wf_93003_30s_111717_14	0.74	GDControlxHandGal4	14	111717	1	f	control	2.79773	2.79407	0.0735436	0.0263213				0.357673	0.357901	0.00914037	0.0255388				0.18704	0.1895	0.00959323	0.0506239	0.522934	15.5243				0.17069	0.168499	0.00678309	0.040256	0.477224	14.338			0.0255388	0.912589	80.5887	61.5803	71.0845	48.5589	37.3608	42.9599	0.395651
HandGal4xGDControl_14_1wf_93003_30s_112217_14	0.74	GDControlxHandGal4	14	112217	1	f	control	1.87835	1.85048	0.0820496	0.0443396				0.533251	0.5404	0.0223561	0.0413697				0.349114	0.357899	0.0217576	0.0607925	0.654691	19.2013				0.183982	0.182501	0.00635805	0.0348385	0.34502	10.303			0.0413697	0.526997	86.6306	72.5804	79.6055	60.7522	46.6259	53.689	0.325561
HandGal4xGDControl_15_1wf_93003_30s_112217_15	0.74	GDControlxHandGal4	15	112217	1	f	control	1.95428	1.97902	0.0588091	0.0297163				0.512083	0.5054	0.0156568	0.030979				0.358297	0.351	0.0159446	0.0454264	0.699685	20.7812				0.153786	0.1544	0.00206732	0.0133894	0.300315	8.9196			0.030979	0.429215	95.4629	77.9252	86.694	57.7247	45.3578	51.5413	0.405481
HandGal4xGDControl_16_1wf_93003_30s_112217_16	0.74	GDControlxHandGal4	16	112217	1	f	control	2.47232	2.457	0.141499	0.0575901				0.405804	0.407	0.0233623	0.0574013				0.235543	0.2316	0.0217459	0.0938941	0.580434	17.1946				0.170238	0.168499	0.00480914	0.0285411	0.419507	12.5976			0.0574013	0.722747	111.742	85.8687	98.8056	74.7437	54.805	64.7743	0.344426
HandGal4xGDControl_17_1wf_93003_30s_112217_17	0.74	GDControlxHandGal4	17	112217	1	f	control	1.95074	1.95198	0.049059	0.025133				0.512942	0.5123	0.0125671	0.0245307				0.318234	0.3159	0.0126156	0.0399353	0.62041	18.4576				0.194574	0.1965	0.00431412	0.0219548	0.37933	11.2853			0.0245307	0.611418	94.0848	69.623	81.8539	59.9583	40.0216	49.9899	0.389278
HandGal4xGDControl_18_1wf_93003_30s_112217_18	0.74	GDControlxHandGal4	18	112217	1	f	control	1.39594	1.38332	0.0812788	0.0587564				0.718761	0.7229	0.0420362	0.0581493				0.541756	0.5474	0.041555	0.0759135	0.753736	22.212				0.176969	0.1755	0.00356899	0.0203361	0.246214	7.4327			0.0581493	0.326658	90.283	55.9912	73.1371	57.72	43.1046	50.4123	0.310715
HandGal4xGDControl_19_1wf_93003_30s_112217_19	0.74	GDControlxHandGal4	19	112217	1	f	control	2.70501	2.74048	0.235738	0.0860207				0.373562	0.3649	0.0481471	0.131946				0.200583	0.1895	0.0477698	0.252083	0.536946	16.2472				0.17247	0.1754	0.00900162	0.0513206	0.46169	13.7976			0.131946	0.859845	88.877	73.603	81.24	58.577	43.6851	51.131	0.370618
HandGal4xGDControl_20_1wf_93003_30s_112217_20	0.74	GDControlxHandGal4	20	112217	1	f	control	2.20344	2.03541	0.440723	0.216527				0.467543	0.491301	0.0786838	0.160154				0.292352	0.3228	0.08007	0.248049	0.625294	18.7105				0.176001	0.1755	0.00613788	0.0349737	0.376439	11.2641			0.160154	0.60202	97.0106	72.5804	84.7955	56.415	40.2059	48.3105	0.430271
HandGal4xGDControl_21_1wf_93003_30s_112217_21	0.74	GDControlxHandGal4	21	112217	1	f	control	2.39409	2.37474	0.0470234	0.0198015				0.417828	0.421	0.00808674	0.0192084				0.241876	0.2456	0.0084838	0.0345432	0.578889	17.1732				0.175944	0.175499	0.00274049	0.0156154	0.421093	12.668			0.0192084	0.727416	78.2933	63.0565	70.6749	50.8612	40.7605	45.8109	0.351809
HandGal4xGDControl_22_1wf_93003_30s_112217_22	0.74	GDControlxHandGal4	22	112217	1	f	control	2.54193	2.59067	0.23607	0.0911231				0.397321	0.386	0.0457029	0.118401				0.233656	0.2316	0.0259579	0.112081	0.588078	17.5242				0.163636	0.1614	0.0268817	0.166553	0.411847	12.4363			0.118401	0.700327	103.769	79.097	91.433	63.178	58.3522	60.7651	0.335414
HandGal4xGDControl_23_1wf_93003_30s_112217_23	0.74	GDControlxHandGal4	23	112217	1	f	control	3.25137	3.23834	0.0537869	0.0166094				0.307641	0.3088	0.00505016	0.0163542				0.154402	0.1544	0.00571387	0.037007	0.50189	14.977				0.153252	0.1544	0.00401265	0.0259887	0.498152	15.0187			0.0163542	0.992552	68.824		68.824	40.7269		40.7269	0.408245
HandGal4xGDControl_24_1wf_93003_30s_112217_24	0.74	GDControlxHandGal4	24	112217	1	f	control	1.73144	1.73762	0.0654202	0.0376493				0.578518	0.575499	0.0258464	0.0449113				0.380086	0.378901	0.0238661	0.0629877	0.657	19.3844				0.198394	0.1965	0.00497149	0.0253002	0.342935	10.3165			0.0449113	0.521971	87.3325	90.4739	88.9032	52.5608	49.7179	51.1394	0.424775
HandGal4xGDControl_25_1wf_93003_30s_112217_25	0.74	GDControlxHandGal4	25	112217	1	f	control	3.21954	3.31345	0.249806	0.0753914				0.312272	0.3018	0.0254885	0.0844551				0.144308	0.1403	0.0247925	0.17671	0.462125	13.8536				0.168073	0.1684	0.00435126	0.0258388	0.538227	16.135			0.0844551	1.16468	98.4895	73.6328	86.0612	64.448	44.0595	54.2538	0.369591
HandGal4xGDControl_26_1wf_93003_30s_112217_26	0.74	GDControlxHandGal4	26	112217	1	f	control	2.7264	2.90782	0.546236	0.18785				0.386181	0.3439	0.112426	0.326914				0.231594	0.1895	0.111212	0.586869	0.599703	18.0643				0.15404	0.1544	0.00618507	0.0400587	0.398881	11.8611			0.326914	0.665132	99.9247	85.1032	92.5139	59.2	48.8904	54.0452	0.415815
HandGal4xGDControl_27_1wf_93003_30s_112217_27	0.74	GDControlxHandGal4	27	112217	1	f	control	1.67472	1.65673	0.121434	0.0732976				0.600124	0.6035	0.042435	0.0703148				0.409204	0.4141	0.040857	0.0986647	0.681865	20.051				0.191172	0.189501	0.0105884	0.0558751	0.318554	9.5586			0.0703148	0.46718	94.0528	70.335	82.1939	58.5021	40.0216	49.2619	0.400663
HandGal4xGDControl_28_1wf_93003_30s_112217_28	0.74	GDControlxHandGal4	28	112217	1	f	control	1.68032	1.67645	0.0445447	0.0265709				0.595541	0.596498	0.0157434	0.026393				0.415048	0.4141	0.015207	0.0367231	0.696926	20.7524				0.180512	0.1824	0.00592596	0.0324889	0.303106	9.02561			0.026393	0.434919	98.5562		98.5562	57.1527		57.1527	0.4201
HandGal4xGDControl_29_1wf_93003_30s_112217_29	0.74	GDControlxHandGal4	29	112217	1	f	control	2.37934	2.37473	0.0376185	0.0158411				0.420387	0.4211	0.00666363	0.0158244				0.259766	0.2597	0.00507319	0.0195348	0.617922	18.4434				0.160631	0.1614	0.00407975	0.0252773	0.382102	11.4048			0.0158244	0.618367	93.3457	98.0828	95.7142	62.3184	60.1634	61.2409	0.360169
HandGal4xLcp9_01_1wf_93003_30s_112017_1	0.74	Lcp9xHandGal4	1	112017	1	f	random	1.66295	1.73762	0.257239	0.148041				0.622377	0.5755	0.15247	0.264935				0.376646	0.3369	0.147327	0.437302	0.605173	18.079				0.245777	0.2456	0.00934183	0.0380368	0.394901	11.7973			0.264935	0.652542	94.0848	68.9631	81.524	60.1634	41.4664	50.8149	0.376687
HandGal4xLcp9_02_1wf_93003_30s_112017_2	0.74	Lcp9xHandGal4	2	112017	1	f	random	1.6607	1.60102	0.218847	0.136692				0.61131	0.631701	0.075471	0.119473				0.3996	0.421101	0.0758019	0.180009	0.653678	19.1808				0.211831	0.210501	0.00987507	0.0469123	0.346519	10.3797			0.119473	0.530107	85.891	69.2997	77.5954	52.6233	39.6643	46.1438	0.405328
HandGal4xLcp9_03_1wf_93003_30s_112017_3	0.74	Lcp9xHandGal4	3	112017	1	f	random	1.84425	1.82682	0.0521621	0.0285535				0.542607	0.5474	0.0150642	0.0275195				0.349387	0.3509	0.0134494	0.0383282	0.643905	19.2163				0.193309	0.1964	0.00485356	0.0247127	0.356259	10.632			0.0275195	0.55328	69.5639	65.4597	67.5118	42.18	41.8607	42.0204	0.377585
HandGal4xLcp9_04_1wf_93003_30s_112017_4	0.74	Lcp9xHandGal4	4	112017	1	f	random	1.98158	1.97902	0.0371492	0.0187715				0.504824	0.505301	0.00940573	0.0186141				0.288576	0.2878	0.00996184	0.0346138	0.571637	17.026				0.216017	0.2176	0.00440333	0.0202359	0.427905	12.745			0.0186141	0.748561	92.6065		92.6065	64.4862		64.4862	0.303653
HandGal4xLcp9_05_1wf_93003_30s_112017_5	0.74	Lcp9xHandGal4	5	112017	1	f	random	2.24092	2.1589	0.236614	0.1096				0.450438	0.4632	0.0443521	0.0957515				0.275939	0.2878	0.0466047	0.161934	0.612602	18.212				0.174499	0.1754	0.010543	0.0601086	0.387398	11.5169			0.0957515	0.63238	85.1	90.283	87.6915	56.98	65.8974	61.4387	0.299377
HandGal4xLcp9_06_1wf_93003_30s_112017_6	0.74	Lcp9xHandGal4	6	112017	1	f	random	1.65449	1.63773	0.263858	0.161111				0.623868	0.6105	0.130733	0.214141				0.42183	0.414	0.126712	0.306068	0.676152	19.826				0.202069	0.203499	0.00882128	0.0433481	0.323896	9.6993			0.214141	0.479029	78.4889	81.1473	79.8181	52.5556	55.2577	53.9067	0.324631
HandGal4xLcp9_07_1wf_93003_30s_112017_7	0.74	Lcp9xHandGal4	7	112017	1	f	random	3.86708	3.85061	0.0513965	0.0133476				0.258635	0.259699	0.00340805	0.0131231				0.0987417	0.0983	0.00381796	0.0388399	0.38178	11.3553				0.159906	0.1614	0.00362054	0.0224321	0.61827	18.5491			0.0131231	1.61944	72.5238	55.7412	64.1325	55.9324	43.0792	49.5058	0.22807
HandGal4xLcp9_08_1wf_93003_30s_112017_8	0.74	Lcp9xHandGal4	8	112017	1	f	random	1.94537	1.9516	0.0589148	0.0301879				0.514503	0.5123	0.0155341	0.0303223				0.311097	0.3088	0.0151693	0.0491234	0.604654	18.0436				0.203407	0.203501	0.00244234	0.0120016	0.395346	11.7976			0.0303223	0.653839	86.58	74.0592	80.3196	56.2595	44.7011	50.4803	0.371507
HandGal4xLcp9_09_1wf_93003_30s_112017_9	0.74	Lcp9xHandGal4	9	112017	1	f	random	2.1838	2.1589	0.18146	0.084052				0.461334	0.4632	0.0434309	0.0937628				0.257617	0.266699	0.0310526	0.116433	0.558417	16.7451				0.202558	0.196501	0.0303789	0.154599	0.439071	13.1663			0.0937628	0.786278	57.7247	69.5757	63.6502	51.8053	32.5684	42.1868	0.337208
HandGal4xLcp9_10_1wf_93003_30s_112017_10	0.74	Lcp9xHandGal4	10	112017	1	f	random	2.77183	2.73973	0.202983	0.0740887				0.362376	0.365	0.0224966	0.0616344				0.185817	0.1895	0.0200477	0.105793	0.512774	15.237				0.176546	0.1755	0.00619239	0.0352843	0.487191	14.6533			0.0616344	0.950107	89.5675	78.5272	84.0474	57.8385	47.6424	52.7405	0.372491
HandGal4xLcp9_11_1wf_93003_30s_112017_11	0.74	Lcp9xHandGal4	11	112017	1	f	random	2.34127	2.26142	0.338433	0.149655				0.433269	0.4422	0.0451694	0.102147				0.267491	0.2738	0.0439426	0.160492	0.617379	18.4569				0.166312	0.1684	0.00483078	0.0286864	0.383853	11.4755			0.102147	0.621746	104.364	84.0153	94.1894	64.397	43.9662	54.1816	0.424759
HandGal4xLcp9_12_1wf_93003_30s_112017_12	0.74	Lcp9xHandGal4	12	112017	1	f	random	1.67064	1.657	0.113208	0.0683212				0.601269	0.6035	0.0405017	0.0671114				0.387141	0.386	0.0417549	0.108174	0.643872	18.9699				0.214198	0.2175	0.0086355	0.0397034	0.356243	10.7099			0.0671114	0.553282	88.3115	72.5238	80.4176	52.7947	37.8052	45.3	0.436691
HandGal4xLcp9_13_1wf_93003_30s_112017_13	0.74	Lcp9xHandGal4	13	112017	1	f	random	2.97397	2.90782	0.245219	0.0843308				0.337989	0.3439	0.0227911	0.0662724				0.177447	0.182501	0.0232047	0.127148	0.525007	15.6153				0.160473	0.1614	0.00525133	0.0325362	0.474788	14.2821			0.0662724	0.904346	92.9253	94.6332	93.7793	59.3709	62.8477	61.1093	0.348371
HandGal4xLcp9_14_1wf_93003_30s_112017_14	0.74	Lcp9xHandGal4	14	112017	1	f	random	2.10584	2.09556	0.154239	0.0736029				0.476785	0.477201	0.0267971	0.0561547				0.279055	0.2807	0.026298	0.0936871	0.585285	17.5805				0.197757	0.196501	0.0123796	0.0630004	0.41477	12.2609			0.0561547	0.708664	86.5832		86.5832	58.4647		58.4647	0.324757
HandGal4xLcp9_15_1wf_93003_30s_112017_15	0.74	Lcp9xHandGal4	15	112017	1	f	random	2.38558	2.37474	0.132544	0.055814				0.42029	0.4211	0.0201594	0.0478732				0.242186	0.2456	0.0229336	0.0933778	0.576235	17.1952				0.176731	0.175499	0.00431531	0.0245888	0.420498	12.5479			0.0478732	0.729733	102.123	76.9636	89.5431	65.8766	49.7784	57.8275	0.354194
HandGal4xLcp9_16_1wf_93003_30s_112017_16	0.74	Lcp9xHandGal4	16	112017	1	f	random	1.84072	1.85048	0.0575759	0.0311141				0.54378	0.5474	0.0171381	0.0313083				0.333813	0.329901	0.0170489	0.0516789	0.613875	18.3597				0.210162	0.210501	0.0043289	0.0205648	0.386483	11.5589			0.0313083	0.62958	96.9654	86.6938	91.8296	61.4913	54.2022	57.8467	0.370064
HandGal4xLcp9_17_1wf_93003_30s_112017_17	0.74	Lcp9xHandGal4	17	112017	1	f	random	1.82511	1.71674	0.254529	0.148264				0.555892	0.5826	0.0689164	0.118291				0.338453	0.3789	0.0763269	0.201443	0.608846	17.938				0.217572	0.2176	0.00964511	0.044325	0.391393	11.7489			0.118291	0.642844	106.724	89.5675	98.1459	72.7612	53.3006	63.0309	0.357784
HandGal4xLcp9_18_1wf_93003_30s_112017_18	0.74	Lcp9xHandGal4	18	112017	1	f	random	1.80271	1.80375	0.0619917	0.0343682				0.555364	0.5544	0.0188265	0.0339583				0.335702	0.336899	0.0189445	0.056232	0.604471	18.1279				0.218995	0.2176	0.00315178	0.0144843	0.394326	11.8257			0.0339583	0.652349	109.53	87.8483	98.6892	76.2775	46.7139	61.4957	0.376875
HandGal4xLcp9_19_1wf_93003_30s_112017_19	0.74	Lcp9xHandGal4	19	112017	1	f	random	1.99072	2.00682	0.0698737	0.0348181				0.502931	0.498301	0.018158	0.0364398				0.321892	0.3228	0.0154267	0.0477902	0.640032	19.3135				0.181054	0.175501	0.0105906	0.0603451	0.359998	10.6822			0.0364398	0.562469	81.4135	75.182	78.2977	57.739	46.9944	52.3667	0.331185
HandGal4xLcp9_20_1wf_93003_30s_112017_20	0.74	Lcp9xHandGal4	20	112017	1	f	random	2.46087	2.37473	0.356118	0.149961				0.413779	0.421101	0.0538639	0.127912				0.223633	0.2387	0.0604439	0.253221	0.540464	16.3252				0.190453	0.189501	0.0127001	0.0670185	0.460276	13.7126			0.127912	0.851631	99.2594	88.1097	93.6845	65.8974	51.0814	58.4894	0.375677
HandGal4xLcp9_21_1wf_93003_30s_112017_21	0.74	Lcp9xHandGal4	21	112017	1	f	random	3.50354	3.47584	0.228587	0.0657645				0.286597	0.2878	0.0181952	0.0632218				0.125248	0.133299	0.0185486	0.13915	0.437018	13.0258				0.161284	0.1614	0.00849638	0.0526418	0.562755	16.9348			0.0632218	1.28772	85.9197		85.9197	57.0232		57.0232	0.33632
HandGal4xLcp9_22_1wf_93003_30s_112017_22	0.74	Lcp9xHandGal4	22	112017	1	f	random	1.96572	1.95198	0.0432532	0.0221586				0.50894	0.5123	0.0110485	0.0215665				0.323441	0.3229	0.0103889	0.0321736	0.63552	18.7596				0.185447	0.182501	0.00455379	0.0249522	0.36438	10.9414			0.0215665	0.573357	76.9636	72.5238	74.7437	60.7927	46.4729	53.6328	0.282443
HandGal4xLcp9_23_1wf_93003_30s_112017_23	0.74	Lcp9xHandGal4	23	112017	1	f	random	4.25213	4.31591	0.205184	0.0475414				0.235666	0.2386	0.0110841	0.0464546				0.115104	0.112301	0.00994166	0.088527	0.48842	14.6182				0.120364	0.1193	0.00408678	0.0342563	0.510739	15.2862			0.0464546	1.0457	94.1663	78.6631	86.4147	74.8315	52.6233	63.7274	0.262539
HandGal4xLcp9_24_1wf_93003_30s_112017_24	0.74	Lcp9xHandGal4	24	112017	1	f	random	2.88891	2.90782	0.0700988	0.024107				0.346338	0.343901	0.0083578	0.024303				0.20132	0.2035	0.0110893	0.054493	0.581281	17.3135				0.145019	0.1404	0.00958721	0.068285	0.418719	12.4716			0.024303	0.72034	104.046	94.1663	99.106	64.8926	51.3221	58.1073	0.413685
HandGal4xLcp9_25_1wf_93003_30s_112017_25	0.74	Lcp9xHandGal4	25	112017	1	f	random	2.80351	2.73973	0.170208	0.062126				0.357758	0.364901	0.0202041	0.0553689				0.197529	0.203501	0.0193974	0.0953185	0.55213	16.3949				0.160243	0.1614	0.00342565	0.0212246	0.447909	13.4604			0.0553689	0.811237	83.7803	101.25	92.5153	57.215	75.7913	66.5031	0.281166
HandGal4xLcp9_26_1wf_93003_30s_112017_26	0.74	Lcp9xHandGal4	26	112017	1	f	random	2.3264	2.33536	0.050439	0.021598				0.430039	0.428101	0.00922157	0.0215407				0.254453	0.2527	0.00846433	0.0334956	0.591697	17.8117				0.175662	0.175499	0.00377467	0.0215082	0.40848	12.1207			0.0215407	0.690353	96.2114	75.4836	85.8475	65.8766	37.8559	51.8663	0.395833
HandGal4xLcp9_27_1wf_93003_30s_112017_27	0.74	Lcp9xHandGal4	27	112017	1	f	random	1.20516	1.14916	0.162729	0.141606				0.84198	0.8702	0.100901	0.115952				0.616006	0.6457	0.0991097	0.153492	0.731616	21.5602				0.225739	0.2316	0.0100807	0.0435265	0.268105	8.1266			0.115952	0.366456	86.6938	68.481	77.5874	49.6683	38.2015	43.9349	0.433737
[truncated: 36 more columns]

## Sheet: data_random_04_26_18
File.Name	Scale.Factor	GenoType	ID	Comments	Age	Sex	Type	Heart.Rate.Mean	Heart.Rate.Median	Heart.Rate.Stddev	Heart.Rate.SDonMean				Heart.Period.Mean	Heart.Period.Median	Heart.Period.Stddev	Heart.Period.SDonMean				Diastolic.Interval.Mean	Diastolic.Interval.Median	Diastolic.Interval.Stddev	Diastolic.Interval.SDonMean	DIonHPmean	Diastolic.Interval.TotalTime				Systolic.Interval.Mean	Systolic.Interval.Median	Systolic.Interval.Stddev	Systolic.Interval.SDonMean	SIonHPmean	Systolic.Interval.TotalTime	SIAI		Arrhythmia.Index	SIMean.on.DIMean	1st.Diastolic.Diameter.Vertical	2nd.Diastolic.Diameter.Vertical	Avg.Diastolic.Diameter	1st.Systolic.Diameter.Vertical	2nd.Systolic.Diameter.Vertical	Avg.Systolic.Diameter	Fractional.Shortening	1stDiastolicHorizontal	DiastolicSurfaceArea(mm^2)
DgkRnaiHandGal4_01_1wf_C11440_30s_240418	0.633	DgkRnaiHandGal4	1	240418	1	f	random	1.70724	1.67609	0.117359	0.0700198				0.58821	0.604252	0.0406248	0.0672316				0.422384	0.435998	0.038166	0.0875371	0.718084	21.1192				0.165574	0.168268	0.00502295	0.0298508	0.281488	8.44429			0.0672316	0.391999	91.2926	85.4573	88.375	46.8591	47.3567	47.1079	0.466954
DgkRnaiHandGal4_02_1wf_C11440_30s_240418	0.633	DgkRnaiHandGal4	2	240418	1	f	random	2.48655	2.29375	0.720965	0.314317				0.433745	0.435972	0.120214	0.275737				0.267155	0.282991	0.123681	0.437048	0.615925	18.1665				0.16659	0.16063	0.0175733	0.109403	0.384075	11.3282			0.275737	0.623574	84.3815	86.0903	85.2359	57.2541	56.3406	56.7973	0.333645
DgkRnaiHandGal4_03_1wf_C11440_30s_240418	0.633	DgkRnaiHandGal4	3	240418	1	f	random	2.42542	2.46651	0.301092	0.122072				0.420697	0.413015	0.0725416	0.175639				0.245205	0.244794	0.0296747	0.121223	0.582853	17.1643				0.175391	0.160634	0.0608322	0.3787	0.416905	12.4527			0.175639	0.715283	90.3861	74.4495	82.4178	63.6818	50.9594	57.3206	0.304512
DgkRnaiHandGal4_04_1wf_C11440_30s_240418	0.633	DgkRnaiHandGal4	4	240418	1	f	random	2.1645	2.10875	0.259149	0.122892				0.467076	0.474215	0.0447563	0.0943798				0.299162	0.305963	0.0444592	0.145309	0.6405	18.8472				0.16792	0.168276	0.00655628	0.0389615	0.359513	10.7469			0.0943798	0.5613	89.062	74.5893	81.8257	59.0864	47.7946	53.4405	0.346898
DgkRnaiHandGal4_05_1wf_C11440_30s_240418	0.633	DgkRnaiHandGal4	5	240418	1	f	random	0.982696	0.961315	0.144017	0.149813				1.03899	1.04794	0.148615	0.141816				0.845371	0.849067	0.14556	0.171435	0.813644	21.1343				0.198875	0.198874	0.0127922	0.0643231	0.191411	4.97188			0.141816	0.235252	72.806	75.0178	73.9119	45.6155	48.8437	47.2296	0.361002
DgkRnaiHandGal4_06_1wf_C11440_30s_240418	0.633	DgkRnaiHandGal4	6	240418	1	f	random	1.50193	1.48558	0.146669	0.0987282				0.67155	0.68074	0.060323	0.0886138				0.514746	0.520153	0.0597728	0.114914	0.766504	22.6488				0.156718	0.153015	0.00578876	0.0378313	0.233368	7.05233			0.0886138	0.304458	91.8635	81.7183	86.7909	50.6756	48.8888	49.7822	0.426413
DgkRnaiHandGal4_07_1wf_C11440_30s_240418	0.633	DgkRnaiHandGal4	7	240418	1	f	random	2.36175	2.07523	0.71148	0.342844				0.448164	0.481888	0.0973136	0.201942				0.2778	0.321257	0.0997966	0.310645	0.619862	18.3348				0.170364	0.175934	0.0157584	0.0895702	0.380138	11.244			0.201942	0.613262	87.9961	81.113	84.5545	61.4141	56.511	58.9625	0.302669
DgkRnaiHandGal4_08_1wf_C11440_30s_240418	0.633	DgkRnaiHandGal4	8	240418	1	f	random	2.16026	2.10849	0.361395	0.1714				0.472512	0.481864	0.0633135	0.131393				0.281164	0.290675	0.0491431	0.169065	0.595041	17.4322				0.191225	0.183578	0.0418643	0.228047	0.404698	12.0472			0.131393	0.680118	89.5242	76.0048	82.7645	59.2083	48.9174	54.0629	0.346787
DgkRnaiHandGal4_09_1wf_C11440_30s_240418	0.633	DgkRnaiHandGal4	9	240418	1	f	random	2.10467	2.10861	0.399673	0.189543				0.490303	0.481848	0.0832467	0.172765				0.313356	0.305936	0.0816454	0.26687	0.639106	18.8013				0.176947	0.175936	0.00698272	0.039689	0.360894	10.6168			0.172765	0.564686	86.088	73.234	79.661	59.5155	50.4577	54.9866	0.309743
DgkRnaiHandGal4_10_1wf_C11440_30s_240418	0.633	DgkRnaiHandGal4	10	240418	1	f	random	0.737688	0.702877	0.145717	0.207315				1.3985	1.43034	0.231596	0.161917				1.16861	1.20089	0.236051	0.196564	0.835615	21.0349				0.229468	0.221897	0.0136556	0.0615402	0.164081	4.35988			0.161917	0.19636	73.6487	75.3695	74.5091	43.7503	48.1746	45.9625	0.38313
DgkRnaiHandGal4_11_1wf_C11440_30s_240418	0.633	DgkRnaiHandGal4	11	240418	1	f	random	2.45127	2.46653	0.301327	0.122166				0.414772	0.405428	0.0616501	0.152062				0.241107	0.244787	0.0320682	0.131004	0.581301	17.1186				0.173696	0.168252	0.0428859	0.254891	0.418774	12.5061			0.152062	0.720409	87.5304	76.1286	81.8295	60.9688	54.673	57.8209	0.293398
DgkRnaiHandGal4_12_1wf_C11440_30s_240418	0.633	DgkRnaiHandGal4	12	240418	1	f	random	1.50258	1.48563	0.148924	0.100243				0.671376	0.680769	0.0607154	0.0891864				0.500832	0.512493	0.0612048	0.119426	0.745979	22.0366				0.170494	0.168306	0.00634097	0.0376753	0.253947	7.67221			0.0891864	0.340421	93.7353	86.0973	89.9163	60.6756	47.1872	53.9314	0.400205
DgkRnaiHandGal4_13_1wf_C11440_30s_240418	0.633	DgkRnaiHandGal4	13	240418	1	f	random	2.19234	2.10867	0.369316	0.175141				0.464891	0.474232	0.057019	0.120235				0.300254	0.313602	0.0492135	0.15693	0.645859	18.916				0.164575	0.160633	0.0298553	0.18586	0.354008	10.5328			0.120235	0.54812	87.1083	76.0918	81.6	61.4532	49.8626	55.6579	0.317918
DgkRnaiHandGal4_01_1wf_C11440_30s_260418	0.633	DgkRnaiHandGal4	1	260418	1	f	random	1.53841	1.45262	0.341578	0.235145				0.679519	0.68841	0.141725	0.205873				0.480496	0.512486	0.134864	0.263156	0.707113	21.1418				0.195226	0.206541	0.0292906	0.141815	0.287301	8.58995			0.205873	0.406301	77.2675	84.8881	81.0778	53.1871	71.3523	62.2697	0.231976
DgkRnaiHandGal4_02_1wf_C11440_30s_260418	0.633	DgkRnaiHandGal4	2	260418	1	f	random	1.1064	1.08046	0.0891348	0.0824974				0.908801	0.925542	0.0667692	0.0721407				0.713512	0.734299	0.0680022	0.0926083	0.785114	22.8324				0.195397	0.198847	0.00513718	0.0258349	0.215005	6.4481			0.0721407	0.273852	93.1048	72.3339	82.7194	65.8807	47.7946	56.8377	0.312886
DgkRnaiHandGal4_03_1wf_C11440_30s_260418	0.633	DgkRnaiHandGal4	3	260418	1	f	random	2.70896	2.72375	0.317617	0.11661				0.374512	0.36714	0.0469354	0.12784				0.184157	0.17592	0.0462725	0.263032	0.491726	14.5484				0.190366	0.191225	0.00372861	0.0194986	0.508304	15.2293			0.12784	1.03371	82.9447	77.6322	80.2885	53.8199	51.2065	52.5132	0.345943
DgkRnaiHandGal4_04_1wf_C11440_30s_260418	0.633	DgkRnaiHandGal4	4	260418	1	f	random	0.820859	0.889346	0.186543	0.209753				1.4013	1.13971	0.978129	0.858226				1.17681	0.917889	0.974444	1.06161	0.839793	23.5361				0.22437	0.221828	0.00553068	0.0249322	0.160115	4.71176			0.858226	0.19066	81.0463	67.1398	74.093	53.8385		53.8385	0.273366
DgkRnaiHandGal4_05_1wf_C11440_30s_260418	0.633	DgkRnaiHandGal4	5	260418	1	f	random	1.3629	1.32052	0.382167	0.289406				0.798687	0.772572	0.244658	0.31668				0.639971	0.619571	0.237862	0.383914	0.801278	23.0389				0.158974	0.160615	0.011793	0.0734241	0.199045	5.88205			0.31668	0.248409	78.0671	85.5394	81.8033	61.5607	64.6156	63.0882	0.228782
DgkRnaiHandGal4_06_1wf_C11440_30s_260418	0.633	DgkRnaiHandGal4	6	260418	1	f	random	3.49932	3.63163	0.627382	0.172755				0.298699	0.275359	0.0786933	0.285785				0.13623	0.137671	0.0235131	0.170792	0.456077	13.623				0.162561	0.137705	0.0618173	0.448912	0.54423	16.0935			0.285785	1.19329	89.5242	67.7783	78.6513	64.2456	44.3145	54.2801	0.309864
DgkRnaiHandGal4_07_1wf_C11440_30s_260418	0.633	DgkRnaiHandGal4	7	260418	1	f	random	1.67685	1.67607	0.0447121	0.0266768				0.596781	0.596634	0.0159465	0.0267275				0.426001	0.428331	0.0153341	0.0357995	0.713832	20.8741				0.170729	0.168295	0.00432138	0.0256775	0.286084	8.53646			0.0267275	0.400772	93.7182	79.758	86.7381	61.4043	57.0016	59.203	0.317452
DgkRnaiHandGal4_08_1wf_C11440_30s_260418	0.633	DgkRnaiHandGal4	8	260418	1	f	random	2.16305	2.17894	0.229318	0.105243				0.467684	0.458939	0.0517883	0.112844				0.302076	0.298312	0.0342223	0.11472	0.645898	19.0308				0.165411	0.152987	0.025827	0.168819	0.35368	10.5863			0.112844	0.547579	77.1793	66.8767	72.028	54.9982	41.0475	48.0228	0.333275
DgkRnaiHandGal4_09_1wf_C11440_30s_260418	0.633	DgkRnaiHandGal4	9	260418	1	f	random	1.14851	1.02137	0.370533	0.362781				0.945766	0.979078	0.256561	0.262044				0.748862	0.787853	0.256298	0.325312	0.791805	23.2147				0.196904	0.198874	0.00726908	0.0365513	0.208195	6.10402			0.262044	0.262937	93.0854	68.364	80.7247	67.098	46.2133	56.6557	0.298162
DgkRnaiHandGal4_10_1wf_C11440_30s_260418	0.633	DgkRnaiHandGal4	10	260418	1	f	random	1.74205	1.76667	0.129268	0.0731706				0.579377	0.566038	0.0756788	0.133699				0.397449	0.38246	0.0758235	0.198252	0.685995	20.2699				0.182253	0.183575	0.00462196	0.0251775	0.314567	9.47715			0.133699	0.458557	81.0858	80.0714	80.5786	52.6	55.578	54.089	0.328743
DgkRnaiHandGal4_11_1wf_C11440_30s_260418	0.633	DgkRnaiHandGal4	11	260418	1	f	random	1.55736	1.59423	0.286053	0.17943				0.66703	0.63489	0.144183	0.2271				0.475091	0.443615	0.138392	0.311965	0.712247	21.3791				0.189312	0.183586	0.0116979	0.0637188	0.283813	8.32972			0.2271	0.398475	89.3338	77.8487	83.5912	57.6065	53.6521	55.6293	0.334508
DgkRnaiHandGal4_12_1wf_C11440_30s_260418	0.633	DgkRnaiHandGal4	12	260418	1	f	random	1.10997	1.06291	0.214977	0.202252				0.924098	0.948496	0.129219	0.136236				0.713271	0.734324	0.129235	0.175992	0.771856	22.8247				0.210697	0.206541	0.00678174	0.0328348	0.228003	6.95301			0.136236	0.295396	85.4761	83.2148	84.3455	55.7615	51.3706	53.5661	0.364921
DgkRnaiHandGal4_13_1wf_C11440_30s_260418	0.633	DgkRnaiHandGal4	13	260418	1	f	random	2.00116	1.89457	0.314088	0.165783				0.508862	0.527824	0.0653341	0.12378				0.311368	0.336559	0.0656242	0.194986	0.61189	18.0593				0.198085	0.198876	0.00550374	0.0276742	0.38927	11.4889			0.12378	0.636176	71.5542	63.2905	67.4224	46.8591	45.3866	46.1228	0.315912
DgkRnaiHandGal4_14_1wf_C11440_30s_260418	0.633	DgkRnaiHandGal4	14	260418	1	f	random	2.06892	1.98086	0.264199	0.133376				0.489028	0.504833	0.0501177	0.0992758				0.313483	0.328913	0.0495442	0.15063	0.641032	18.809				0.175551	0.175927	0.00489804	0.0278413	0.35898	10.7086			0.0992758	0.560003	85.4573	69.0202	77.2388	51.9677	45.7909	48.8793	0.367166
DgkRnaiHandGal4_15_1wf_C11440_30s_260418	0.633	DgkRnaiHandGal4	15	260418	1	f	random	2.08189	2.10871	0.105582	0.0500693				0.481513	0.474223	0.0251668	0.0530694				0.310397	0.298332	0.0257996	0.0864794	0.644628	19.2446				0.170667	0.168297	0.00426046	0.0253152	0.354439	10.4107			0.0530694	0.549834	110.149	86.1252	98.1373	84.1914	63.3285	73.7599	0.2484
UASGFPVal10HandGal4_01_1wf_C11440_30s_240418	0.633	UASGFPVal10HandGal4	1	240418	1	f	control	1.13935	1.13681	0.0577423	0.0507935				0.87987	0.879658	0.043208	0.0491191				0.696291	0.703668	0.0418005	0.0594037	0.791356	22.9776				0.183579	0.183601	0.0124403	0.0677573	0.208643	6.24167			0.0491191	0.263652	98.1456	99.3891	98.7673	75.2179	57.6586	66.4382	0.327326
UASGFPVal10HandGal4_01_1wf_C11440_30s_240418	0.633	UASGFPVal10HandGal4	1	240418	1	f	control	1.13935	1.13681	0.0577423	0.0507935				0.87987	0.879658	0.043208	0.0491191				0.696291	0.703668	0.0418005	0.0594037	0.791356	22.9776				0.183579	0.183601	0.0124403	0.0677573	0.208643	6.24167			0.0491191	0.263652	98.1456	99.3891	98.7673	75.2179	57.6586	66.4382	0.327326
UASGFPVal10HandGal4_02_1wf_C11440_30s_240418	0.633	UASGFPVal10HandGal4	2	240418	1	f	control	1.8862	1.81572	0.225018	0.123927				0.535849	0.550745	0.0526415	0.0955824				0.333499	0.344219	0.0526854	0.153058	0.622376	18.3425				0.202424	0.206517	0.00842846	0.0408124	0.377764	11.3358			0.0955824	0.606971	101.614	92.7296	97.1717	80.1814	68.6944	74.4379	0.233955
UASGFPVal10HandGal4_02_1wf_C11440_30s_240418	0.633	UASGFPVal10HandGal4	2	240418	1	f	control	1.8862	1.81572	0.225018	0.123927				0.535849	0.550745	0.0526415	0.0955824				0.333499	0.344219	0.0526854	0.153058	0.622376	18.3425				0.202424	0.206517	0.00842846	0.0408124	0.377764	11.3358			0.0955824	0.606971	101.614	92.7296	97.1717	80.1814	68.6944	74.4379	0.233955
UASGFPVal10HandGal4_03_1wf_C11440_30s_240418	0.633	UASGFPVal10HandGal4	3	240418	1	f	control	2.06276	2.0753	0.471414	0.227155				0.513558	0.481858	0.134857	0.279869				0.369833	0.336571	0.128922	0.383046	0.720138	21.0805				0.144017	0.137707	0.0228969	0.166272	0.28043	8.353			0.279869	0.389412	96.8821	83.3063	90.0942	71.5738	64.6807	68.1273	0.243822
UASGFPVal10HandGal4_03_1wf_C11440_30s_240418	0.633	UASGFPVal10HandGal4	3	240418	1	f	control	2.06276	2.0753	0.471414	0.227155				0.513558	0.481858	0.134857	0.279869				0.369833	0.336571	0.128922	0.383046	0.720138	21.0805				0.144017	0.137707	0.0228969	0.166272	0.28043	8.353			0.279869	0.389412	96.8821	83.3063	90.0942	71.5738	64.6807	68.1273	0.243822
UASGFPVal10HandGal4_04_1wf_C11440_30s_240418	0.633	UASGFPVal10HandGal4	4	240418	1	f	control	1.06677	1.06288	0.0690079	0.0649251				0.941324	0.940836	0.060822	0.0646468				0.770339	0.772552	0.0554491	0.0717739	0.818357	23.8805				0.171617	0.168274	0.0120926	0.0718626	0.182315	5.49175			0.0646468	0.222781	90.0664	79.3778	84.7221	65.3954	53.5475	59.4714	0.298041
UASGFPVal10HandGal4_04_1wf_C11440_30s_240418	0.633	UASGFPVal10HandGal4	4	240418	1	f	control	1.06677	1.06288	0.0690079	0.0649251				0.941324	0.940836	0.060822	0.0646468				0.770339	0.772552	0.0554491	0.0717739	0.818357	23.8805				0.171617	0.168274	0.0120926	0.0718626	0.182315	5.49175			0.0646468	0.222781	90.0664	79.3778	84.7221	65.3954	53.5475	59.4714	0.298041
UASGFPVal10HandGal4_05_1wf_C11440_30s_240418	0.633	UASGFPVal10HandGal4	5	240418	1	f	control	1.0343	1.02137	0.0892354	0.0873683				0.972701	0.986723	0.0708885	0.0718423				0.793199	0.803144	0.0665438	0.0828542	0.81546	23.796				0.179388	0.183574	0.00789196	0.0429907	0.184423	5.56104			0.0718423	0.226158	101.962	67.7783	84.8702	77.2286	47.5804	62.4045	0.264707
UASGFPVal10HandGal4_05_1wf_C11440_30s_240418	0.633	UASGFPVal10HandGal4	5	240418	1	f	control	1.0343	1.02137	0.0892354	0.0873683				0.972701	0.986723	0.0708885	0.0718423				0.793199	0.803144	0.0665438	0.0828542	0.81546	23.796				0.179388	0.183574	0.00789196	0.0429907	0.184423	5.56104			0.0718423	0.226158	101.962	67.7783	84.8702	77.2286	47.5804	62.4045	0.264707
UASGFPVal10HandGal4_06_1wf_C11440_30s_240418	0.633	UASGFPVal10HandGal4	6	240418	1	f	control	1.62851	1.63413	0.0570318	0.0349004				0.614791	0.619555	0.0216281	0.0349091				0.451292	0.451313	0.0196905	0.0436293	0.734058	21.662				0.16344	0.160652	0.00511493	0.0318385	0.265846	8.00854			0.0349091	0.362159	94.6224	113.371	103.997	72.0008	88.0985	80.0496	0.230266
UASGFPVal10HandGal4_06_1wf_C11440_30s_240418	0.633	UASGFPVal10HandGal4	6	240418	1	f	control	1.62851	1.63413	0.0570318	0.0349004				0.614791	0.619555	0.0216281	0.0349091				0.451292	0.451313	0.0196905	0.0436293	0.734058	21.662				0.16344	0.160652	0.00511493	0.0318385	0.265846	8.00854			0.0349091	0.362159	94.6224	113.371	103.997	72.0008	88.0985	80.0496	0.230266
UASGFPVal10HandGal4_07_1wf_C11440_30s_240418	0.633	UASGFPVal10HandGal4	7	240418	1	f	control	2.03602	2.04265	0.0385516	0.0188733				0.491323	0.489563	0.00925843	0.0189116				0.297417	0.298293	0.0121349	0.0406811	0.60534	17.845				0.193987	0.198873	0.010038	0.0504746	0.394827	11.8332			0.0189116	0.65224	89.3965	78.7824	84.0895	63.4138	58.5174	60.9656	0.274991
UASGFPVal10HandGal4_07_1wf_C11440_30s_240418	0.633	UASGFPVal10HandGal4	7	240418	1	f	control	2.03602	2.04265	0.0385516	0.0188733				0.491323	0.489563	0.00925843	0.0189116				0.297417	0.298293	0.0121349	0.0406811	0.60534	17.845				0.193987	0.198873	0.010038	0.0504746	0.394827	11.8332			0.0189116	0.65224	89.3965	78.7824	84.0895	63.4138	58.5174	60.9656	0.274991
UASGFPVal10HandGal4_08_1wf_C11440_30s_240418	0.633	UASGFPVal10HandGal4	8	240418	1	f	control	4.51957	4.84205	1.06598	0.220149				0.237793	0.206524	0.0809825	0.392122				0.105008	0.107079	0.0248382	0.231962	0.441594	13.126				0.132581	0.0994606	0.0717557	0.721449	0.557548	16.7052			0.392122	1.26258	106.984	84.2485	95.6165	77.2286	59.6668	68.4477	0.284144
UASGFPVal10HandGal4_08_1wf_C11440_30s_240418	0.633	UASGFPVal10HandGal4	8	240418	1	f	control	4.51957	4.84205	1.06598	0.220149				0.237793	0.206524	0.0809825	0.392122				0.105008	0.107079	0.0248382	0.231962	0.441594	13.126				0.132581	0.0994606	0.0717557	0.721449	0.557548	16.7052			0.392122	1.26258	106.984	84.2485	95.6165	77.2286	59.6668	68.4477	0.284144
UASGFPVal10HandGal4_09_1wf_C11440_30s_240418	0.633	UASGFPVal10HandGal4	9	240418	1	f	control	1.63683	1.63418	0.166037	0.101603				0.616805	0.611929	0.0585285	0.0956458				0.44205	0.443657	0.0590077	0.133003	0.716677	21.2184				0.171625	0.175896	0.00928282	0.0527746	0.278248	8.238			0.0956458	0.388248	92.5242	86.758	89.6411	66.6125	56.9735	61.793	0.310662
UASGFPVal10HandGal4_09_1wf_C11440_30s_240418	0.633	UASGFPVal10HandGal4	9	240418	1	f	control	1.63683	1.63418	0.166037	0.101603				0.616805	0.611929	0.0585285	0.0956458				0.44205	0.443657	0.0590077	0.133003	0.716677	21.2184				0.171625	0.175896	0.00928282	0.0527746	0.278248	8.238			0.0956458	0.388248	92.5242	86.758	89.6411	66.6125	56.9735	61.793	0.310662
UASGFPVal10HandGal4_10_1wf_C11440_30s_240418	0.633	UASGFPVal10HandGal4	10	240418	1	f	control	1.02153	1.02136	0.0561183	0.0549444				0.98188	0.979101	0.0540293	0.0551825				0.798047	0.803141	0.0550086	0.0684918	0.812774	23.9414				0.183834	0.183578	0.00640177	0.0348721	0.187226	5.51501			0.0551825	0.230355	110.867	81.108	95.9876	85.5838	60.1583	72.8711	0.240828
UASGFPVal10HandGal4_10_1wf_C11440_30s_240418	0.633	UASGFPVal10HandGal4	10	240418	1	f	control	1.02153	1.02136	0.0561183	0.0549444				0.98188	0.979101	0.0540293	0.0551825				0.798047	0.803141	0.0550086	0.0684918	0.812774	23.9414				0.183834	0.183578	0.00640177	0.0348721	0.187226	5.51501			0.0551825	0.230355	110.867	81.108	95.9876	85.5838	60.1583	72.8711	0.240828
UASGFPVal10HandGal4_11_1wf_C11440_30s_240418	0.633	UASGFPVal10HandGal4	11	240418	1	f	control	1.32479	1.30736	0.0902124	0.0690035				0.758234	0.7649	0.0514728	0.0672935				0.558373	0.558382	0.0520249	0.0931708	0.736413	21.7766				0.199861	0.198898	0.00703429	0.0353662	0.263587	7.79457			0.0672935	0.357934	94.3191	80.878	87.5986	66.4771	49.7781	58.1276	0.336432
UASGFPVal10HandGal4_11_1wf_C11440_30s_240418	0.633	UASGFPVal10HandGal4	11	240418	1	f	control	1.32479	1.30736	0.0902124	0.0690035				0.758234	0.7649	0.0514728	0.0672935				0.558373	0.558382	0.0520249	0.0931708	0.736413	21.7766				0.199861	0.198898	0.00703429	0.0353662	0.263587	7.79457			0.0672935	0.357934	94.3191	80.878	87.5986	66.4771	49.7781	58.1276	0.336432
UASGFPVal10HandGal4_12_1wf_C11440_30s_240418	0.633	UASGFPVal10HandGal4	12	240418	1	f	control	2.88775	2.90519	0.0465215	0.0160133				0.346366	0.344212	0.00550026	0.0159793				0.209936	0.214137	0.00677589	0.0316428	0.60611	17.8445				0.136445	0.137686	0.00329828	0.0239551	0.393933	11.7343			0.0159793	0.649937	87.3563	68.5279	77.9421	58.2394	38.7425	48.491	0.377859
UASGFPVal10HandGal4_12_1wf_C11440_30s_240418	0.633	UASGFPVal10HandGal4	12	240418	1	f	control	2.88775	2.90519	0.0465215	0.0160133				0.346366	0.344212	0.00550026	0.0159793				0.209936	0.214137	0.00677589	0.0316428	0.60611	17.8445				0.136445	0.137686	0.00329828	0.0239551	0.393933	11.7343			0.0159793	0.649937	87.3563	68.5279	77.9421	58.2394	38.7425	48.491	0.377859
UASGFPVal10HandGal4_13_1wf_C11440_30s_240418	0.633	UASGFPVal10HandGal4	13	240418	1	f	control	1.50698	1.37611	0.335923	0.24411				0.6861	0.726686	0.119271	0.16413				0.528681	0.573686	0.118406	0.206395	0.770559	22.7333				0.157144	0.160601	0.00797972	0.0496867	0.22904	6.91435			0.16413	0.297239	82.9616	83.8456	83.4036	58.9234	64.1863	61.5549	0.261964
UASGFPVal10HandGal4_13_1wf_C11440_30s_240418	0.633	UASGFPVal10HandGal4	13	240418	1	f	control	1.50698	1.37611	0.335923	0.24411				0.6861	0.726686	0.119271	0.16413				0.528681	0.573686	0.118406	0.206395	0.770559	22.7333				0.157144	0.160601	0.00797972	0.0496867	0.22904	6.91435			0.16413	0.297239	82.9616	83.8456	83.4036	58.9234	64.1863	61.5549	0.261964
UASGFPVal10HandGal4_14_1wf_C11440_30s_240418	0.633	UASGFPVal10HandGal4	14	240418	1	f	control	1.41052	1.42097	0.0401324	0.0282429				0.709495	0.703745	0.0203662	0.0289397				0.488422	0.481913	0.0192891	0.0400261	0.688409	20.0253				0.221089	0.221817	0.00441408	0.0198996	0.311615	9.28576			0.0289397	0.45266	82.3776	68.5513	75.4644	55.7615	41.8977	48.8296	0.352945
UASGFPVal10HandGal4_14_1wf_C11440_30s_240418	0.633	UASGFPVal10HandGal4	14	240418	1	f	control	1.41052	1.42097	0.0401324	0.0282429				0.709495	0.703745	0.0203662	0.0289397				0.488422	0.481913	0.0192891	0.0400261	0.688409	20.0253				0.221089	0.221817	0.00441408	0.0198996	0.311615	9.28576			0.0289397	0.45266	82.3776	68.5513	75.4644	55.7615	41.8977	48.8296	0.352945
UASGFPVal10HandGal4_15_1wf_C11440_30s_240418	0.633	UASGFPVal10HandGal4	15	240418	1	f	control	1.46765	1.4689	0.0305923	0.0208266				0.681653	0.68078	0.014139	0.0207688				0.493983	0.497168	0.0144702	0.0291053	0.724683	21.2413				0.187751	0.191207	0.00514082	0.0268861	0.275434	8.26103			0.0207688	0.380075	81.902	78.515	80.2085	64.8756	56.3406	60.6081	0.244368
UASGFPVal10HandGal4_15_1wf_C11440_30s_240418	0.633	UASGFPVal10HandGal4	15	240418	1	f	control	1.46765	1.4689	0.0305923	0.0208266				0.681653	0.68078	0.014139	0.0207688				0.493983	0.497168	0.0144702	0.0291053	0.724683	21.2413				0.187751	0.191207	0.00514082	0.0268861	0.275434	8.26103			0.0207688	0.380075	81.902	78.515	80.2085	64.8756	56.3406	60.6081	0.244368
UASGFPVal10HandGal4_01_1wf_C11440_30s_260418	0.633	UASGFPVal10HandGal4	1	260418	1	f	control	1.56417	1.42112	0.459182	0.323114				0.678451	0.703672	0.15252	0.216748				0.505876	0.535437	0.147769	0.275979	0.745634	22.2586				0.173439	0.175924	0.00872439	0.0495919	0.25564	7.45789			0.216748	0.342849	88.8458	84.4266	86.6362	68.4694	62.8713	65.6703	0.241999
UASGFPVal10HandGal4_01_1wf_C11440_30s_260418	0.633	UASGFPVal10HandGal4	1	260418	1	f	control	1.56417	1.42112	0.459182	0.323114				0.678451	0.703672	0.15252	0.216748				0.505876	0.535437	0.147769	0.275979	0.745634	22.2586				0.173439	0.175924	0.00872439	0.0495919	0.25564	7.45789			0.216748	0.342849	88.8458	84.4266	86.6362	68.4694	62.8713	65.6703	0.241999
UASGFPVal10HandGal4_02_1wf_C11440_30s_260418	0.633	UASGFPVal10HandGal4	2	260418	1	f	control	1.3049	1.2944	0.0815293	0.0629863				0.76913	0.77258	0.0452372	0.0585534				0.570251	0.573679	0.0429324	0.074837	0.741423	21.6695				0.199075	0.198879	0.00533408	0.0268207	0.258831	7.76392			0.0585534	0.349101	95.7924	78.9222	87.3573	74.9109	53.5475	64.2292	0.264753
UASGFPVal10HandGal4_02_1wf_C11440_30s_260418	0.633	UASGFPVal10HandGal4	2	260418	1	f	control	1.3049	1.2944	0.0815293	0.0629863				0.76913	0.77258	0.0452372	0.0585534				0.570251	0.573679	0.0429324	0.074837	0.741423	21.6695				0.199075	0.198879	0.00533408	0.0268207	0.258831	7.76392			0.0585534	0.349101	95.7924	78.9222	87.3573	74.9109	53.5475	64.2292	0.264753
UASGFPVal10HandGal4_03_1wf_C11440_30s_260418	0.633	UASGFPVal10HandGal4	3	260418	1	f	control	2.37483	2.3344	0.239928	0.102779				0.424958	0.428377	0.0393801	0.0919286				0.283782	0.290668	0.0402151	0.138354	0.667788	19.8647				0.141176	0.137711	0.00531102	0.0385665	0.332212	9.88233			0.0919286	0.497481	84.1914	74.1286	79.16	61.4304	50.64	56.0352	0.292127
UASGFPVal10HandGal4_03_1wf_C11440_30s_260418	0.633	UASGFPVal10HandGal4	3	260418	1	f	control	2.37483	2.3344	0.239928	0.102779				0.424958	0.428377	0.0393801	0.0919286				0.283782	0.290668	0.0402151	0.138354	0.667788	19.8647				0.141176	0.137711	0.00531102	0.0385665	0.332212	9.88233			0.0919286	0.497481	84.1914	74.1286	79.16	61.4304	50.64	56.0352	0.292127
UASGFPVal10HandGal4_04_1wf_C11440_30s_260418	0.633	UASGFPVal10HandGal4	4	260418	1	f	control	1.81641	1.79099	0.0792806	0.0442663				0.551452	0.55835	0.0232016	0.0415539				0.355321	0.359501	0.0215055	0.0598205	0.644337	18.832				0.196182	0.198863	0.00476582	0.0239653	0.355756	10.5938			0.0415539	0.552128	88.1326	79.2161	83.6744	61.5607	58.4043	59.9825	0.283144
UASGFPVal10HandGal4_04_1wf_C11440_30s_260418	0.633	UASGFPVal10HandGal4	4	260418	1	f	control	1.81641	1.79099	0.0792806	0.0442663				0.551452	0.55835	0.0232016	0.0415539				0.355321	0.359501	0.0215055	0.0598205	0.644337	18.832				0.196182	0.198863	0.00476582	0.0239653	0.355756	10.5938			0.0415539	0.552128	88.1326	79.2161	83.6744	61.5607	58.4043	59.9825	0.283144
UASGFPVal10HandGal4_05_1wf_C11440_30s_260418	0.633	UASGFPVal10HandGal4	5	260418	1	f	control	1.42559	1.40582	0.218393	0.15535				0.716957	0.71133	0.103937	0.146117				0.515659	0.512484	0.105185	0.205247	0.719233	21.142				0.20124	0.198875	0.0054087	0.0271964	0.280687	8.45209			0.146117	0.390259	94.9289	66.5403	80.7346	66.0811	48.704	57.3925	0.289121
UASGFPVal10HandGal4_05_1wf_C11440_30s_260418	0.633	UASGFPVal10HandGal4	5	260418	1	f	control	1.42559	1.40582	0.218393	0.15535				0.716957	0.71133	0.103937	0.146117				0.515659	0.512484	0.105185	0.205247	0.719233	21.142				0.20124	0.198875	0.0054087	0.0271964	0.280687	8.45209			0.146117	0.390259	94.9289	66.5403	80.7346	66.0811	48.704	57.3925	0.289121
UASGFPVal10HandGal4_06_1wf_C11440_30s_260418	0.633	UASGFPVal10HandGal4	6	260418	1	f	control	1.32173	1.34773	0.0736566	0.0546522				0.758662	0.749584	0.0408778	0.0545339				0.583536	0.573653	0.040539	0.0706681	0.769164	22.1744				0.175147	0.175929	0.00244736	0.013911	0.230863	6.83074			0.0545339	0.300148	83.6423	69.7019	76.6721	62.1502	45.0143	53.5822	0.301151
UASGFPVal10HandGal4_06_1wf_C11440_30s_260418	0.633	UASGFPVal10HandGal4	6	260418	1	f	control	1.32173	1.34773	0.0736566	0.0546522				0.758662	0.749584	0.0408778	0.0545339				0.583536	0.573653	0.040539	0.0706681	0.769164	22.1744				0.175147	0.175929	0.00244736	0.013911	0.230863	6.83074			0.0545339	0.300148	83.6423	69.7019	76.6721	62.1502	45.0143	53.5822	0.301151
UASGFPVal10HandGal4_07_1wf_C11440_30s_260418	0.633	UASGFPVal10HandGal4	7	260418	1	f	control	1.70921	1.69794	0.0536582	0.0316019				0.585609	0.58896	0.0180316	0.0306161				0.432932	0.43597	0.0201143	0.0461368	0.739285	21.6466				0.152683	0.152979	0.00896434	0.0585985	0.260725	7.78683			0.0306161	0.352671	86.8687	60.7812	73.825	65.2758	36.1254	50.7006	0.313232
UASGFPVal10HandGal4_07_1wf_C11440_30s_260418	0.633	UASGFPVal10HandGal4	7	260418	1	f	control	1.70921	1.69794	0.0536582	0.0316019				0.585609	0.58896	0.0180316	0.0306161				0.432932	0.43597	0.0201143	0.0461368	0.739285	21.6466				0.152683	0.152979	0.00896434	0.0585985	0.260725	7.78683			0.0306161	0.352671	86.8687	60.7812	73.825	65.2758	36.1254	50.7006	0.313232
UASGFPVal10HandGal4_08_1wf_C11440_30s_260418	0.633	UASGFPVal10HandGal4	8	260418	1	f	control	1.59048	1.57515	0.0781003	0.0495829				0.63015	0.634861	0.0297083	0.0467949				0.459921	0.466576	0.0288546	0.0618434	0.72986	21.6163				0.170229	0.168283	0.0056848	0.0337811	0.27014	8.00076			0.0467949	0.370126	78.5838	77.353	77.9684	56.369	55.249	55.809	0.28421
UASGFPVal10HandGal4_08_1wf_C11440_30s_260418	0.633	UASGFPVal10HandGal4	8	260418	1	f	control	1.59048	1.57515	0.0781003	0.0495829				0.63015	0.634861	0.0297083	0.0467949				0.459921	0.466576	0.0288546	0.0618434	0.72986	21.6163				0.170229	0.168283	0.0056848	0.0337811	0.27014	8.00076			0.0467949	0.370126	78.5838	77.353	77.9684	56.369	55.249	55.809	0.28421
UASGFPVal10HandGal4_09_1wf_C11440_30s_260418	0.633	UASGFPVal10HandGal4	9	260418	1	f	control	1.34844	1.34779	0.0847755	0.0628998				0.744506	0.741957	0.0464921	0.0626614				0.543086	0.543066	0.0455317	0.0838419	0.729458	21.1804				0.201356	0.198877	0.00435977	0.0219219	0.270456	8.05424			0.0626614	0.370763	84.8433	68.6272	76.7352	58.8826	43.9149	51.3987	0.330181
UASGFPVal10HandGal4_09_1wf_C11440_30s_260418	0.633	UASGFPVal10HandGal4	9	260418	1	f	control	1.34844	1.34779	0.0847755	0.0628998				0.744506	0.741957	0.0464921	0.0626614				0.543086	0.543066	0.0455317	0.0838419	0.729458	21.1804				0.201356	0.198877	0.00435977	0.0219219	0.270456	8.05424			0.0626614	0.370763	84.8433	68.6272	76.7352	58.8826	43.9149	51.3987	0.330181
UASGFPVal10HandGal4_10_1wf_C11440_30s_260418	0.633	UASGFPVal10HandGal4	10	260418	1	f	control	0.93215	0.920666	0.150793	0.163787				1.10381	1.10149	0.197324	0.179143				0.912296	0.910269	0.193825	0.212932	0.826495	23.7197				0.19094	0.191225	0.00736611	0.0385206	0.172983	5.15539			0.179143	0.209297	90.5743	72.9709	81.7726	66.5403	48.704	57.6222	0.295337
UASGFPVal10HandGal4_10_1wf_C11440_30s_260418	0.633	UASGFPVal10HandGal4	10	260418	1	f	control	0.93215	0.920666	0.150793	0.163787				1.10381	1.10149	0.197324	0.179143				0.912296	0.910269	0.193825	0.212932	0.826495	23.7197				0.19094	0.191225	0.00736611	0.0385206	0.172983	5.15539			0.179143	0.209297	90.5743	72.9709	81.7726	66.5403	48.704	57.6222	0.295337
UASGFPVal10HandGal4_11_1wf_C11440_30s_260418	0.633	UASGFPVal10HandGal4	11	260418	1	f	control	1.84054	1.84147	0.248096	0.134727				0.553905	0.543045	0.080387	0.14803				0.363259	0.344215	0.0833371	0.242107	0.655815	19.2527				0.190941	0.191225	0.00858407	0.0448899	0.344717	10.3108			0.14803	0.525632	87.4113	75.9837	81.6975	61.4304	48.741	55.0857	0.325736
UASGFPVal10HandGal4_11_1wf_C11440_30s_260418	0.633	UASGFPVal10HandGal4	11	260418	1	f	control	1.84054	1.84147	0.248096	0.134727				0.553905	0.543045	0.080387	0.14803				0.363259	0.344215	0.0833371	0.242107	0.655815	19.2527				0.190941	0.191225	0.00858407	0.0448899	0.344717	10.3108			0.14803	0.525632	87.4113	75.9837	81.6975	61.4304	48.741	55.0857	0.325736
UASGFPVal10HandGal4_12_1wf_C11440_30s_260418	0.633	UASGFPVal10HandGal4	12	260418	1	f	control	0.800333	0.807033	0.0812072	0.100624				1.26242	1.23911	0.130326	0.105177				1.06454	1.04788	0.120886	0.115363	0.843255	24.4845				0.197282	0.191227	0.0140535	0.0734914	0.156273	4.73478			0.105177	0.185321	96.318	81.8139	89.0659	76.0549	57.0262	66.5406	0.252907
UASGFPVal10HandGal4_12_1wf_C11440_30s_260418	0.633	UASGFPVal10HandGal4	12	260418	1	f	control	0.800333	0.807033	0.0812072	0.100624				1.26242	1.23911	0.130326	0.105177				1.06454	1.04788	0.120886	0.115363	0.843255	24.4845				0.197282	0.191227	0.0140535	0.0734914	0.156273	4.73478			0.105177	0.185321	96.318	81.8139	89.0659	76.0549	57.0262	66.5406	0.252907
UASGFPVal10HandGal4_13_1wf_C11440_30s_260418	0.633	UASGFPVal10HandGal4	13	260418	1	f	control	2.3768	2.29363	0.275673	0.12019				0.424521	0.435991	0.0363039	0.0832676				0.236575	0.244772	0.0338281	0.138202	0.557274	16.5602				0.187946	0.191216	0.00563214	0.0294543	0.442726	13.1563			0.0832676	0.794449	88.0075	72.806	80.4067	57.6169	48.741	53.179	0.338626
UASGFPVal10HandGal4_13_1wf_C11440_30s_260418	0.633	UASGFPVal10HandGal4	13	260418	1	f	control	2.3768	2.29363	0.275673	0.12019				0.424521	0.435991	0.0363039	0.0832676				0.236575	0.244772	0.0338281	0.138202	0.557274	16.5602				0.187946	0.191216	0.00563214	0.0294543	0.442726	13.1563			0.0832676	0.794449	88.0075	72.806	80.4067	57.6169	48.741	53.179	0.338626
UASGFPVal10HandGal4_14_1wf_C11440_30s_260418	0.633	UASGFPVal10HandGal4	14	260418	1	f	control	1.48626	1.48564	0.0876656	0.0590088				0.6752	0.673117	0.0403774	0.0599857				0.472152	0.474201	0.0393069	0.0828908	0.699277	20.7747				0.203048	0.206509	0.00539539	0.0261267	0.300723	8.93412			0.0599857	0.430048	89.2732	69.2057	79.2395	62.0469	46.5546	54.3007	0.314726
UASGFPVal10HandGal4_14_1wf_C11440_30s_260418	0.633	UASGFPVal10HandGal4	14	260418	1	f	control	1.48626	1.48564	0.0876656	0.0590088				0.6752	0.673117	0.0403774	0.0599857				0.472152	0.474201	0.0393069	0.0828908	0.699277	20.7747				0.203048	0.206509	0.00539539	0.0261267	0.300723	8.93412			0.0599857	0.430048	89.2732	69.2057	79.2395	62.0469	46.5546	54.3007	0.314726
UASGFPVal10HandGal4_15_1wf_C11440_30s_260418	0.633	UASGFPVal10HandGal4	15	260418	1	f	control	1.22338	1.12705	0.390495	0.346475				0.873339	0.894914	0.190756	0.213155				0.678741	0.703688	0.192031	0.272892	0.777179	23.0772				0.194598	0.191231	0.00729831	0.038165	0.222821	6.61634			0.213155	0.286705	90.5986	74.4065	82.5025	65.2266	46.4296	55.8281	0.323316
UASGFPVal10HandGal4_15_1wf_C11440_30s_260418	0.633	UASGFPVal10HandGal4	15	260418	1	f	control	1.22338	1.12705	0.390495	0.346475				0.873339	0.894914	0.190756	0.213155				0.678741	0.703688	0.192031	0.272892	0.777179	23.0772				0.194598	0.191231	0.00729831	0.038165	0.222821	6.61634			0.213155	0.286705	90.5986	74.4065	82.5025	65.2266	46.4296	55.8281	0.323316
Oatp58DcRnaiHandGal4_01_1wf_C11440_30s_240418	0.633	Oatp58DcRnaiHandGal4	1	240418	1	f	random	1.18908	1.21051	0.282894	0.233699				0.999119	0.826101	0.853162	1.03276				0.808688	0.611923	0.852855	1.39373	0.809401	23.4519				0.190457	0.19119	0.0107256	0.0560992	0.190625	5.71371			1.03276	0.235514	82.1877	67.8758	75.0317	61.7264	43.9012	52.8138	0.296114
Oatp58DcRnaiHandGal4_02_1wf_C11440_30s_240418	0.633	Oatp58DcRnaiHandGal4	2	240418	1	f	random	1.09808	1.08946	0.0903482	0.0829293				0.915661	0.917886	0.0616718	0.067189				0.72098	0.72664	0.0619181	0.0852115	0.787388	22.3504				0.194812	0.191251	0.00521568	0.0272714	0.212755	6.23397			0.067189	0.270204	97.445	75.9626	86.7038	74.2123	48.1455	61.1789	0.294392
Oatp58DcRnaiHandGal4_03_1wf_C11440_30s_240418	0.633	Oatp58DcRnaiHandGal4	3	240418	1	f	random	1.45106	1.4527	0.126884	0.0873435				0.695879	0.688394	0.0806509	0.117158				0.489905	0.481886	0.0804717	0.166993	0.704009	20.576				0.205631	0.20653	0.00782896	0.0379072	0.295498	8.84212			0.117158	0.419736	94.3255	78.1697	86.2476	71.5402	47.0511	59.2957	0.312495
Oatp58DcRnaiHandGal4_04_1wf_C11440_30s_240418	0.633	Oatp58DcRnaiHandGal4	4	240418	1	f	random	1.20992	1.2571	0.308543	0.245441				1.00038	0.795486	0.801499	1.00756				0.79304	0.588961	0.801775	1.36134	0.792739	22.2051				0.207049	0.206512	0.00851835	0.0412486	0.206971	6.00443			1.00756	0.261083	99.4132	66.4921	82.9527	70.2744	43.0859	56.6801	0.316717
Oatp58DcRnaiHandGal4_05_1wf_C11440_30s_240418	0.633	Oatp58DcRnaiHandGal4	5	240418	1	f	random	1.57963	1.43663	0.438744	0.305398				0.667029	0.711362	0.140471	0.197467				0.47611	0.504846	0.134838	0.267088	0.713776	21.4249				0.190703	0.191227	0.00738824	0.038636	0.2859	8.39095			0.197467	0.400545	99.381	90.2375	94.8092	72.1648	68.1674	70.1661	0.259924
Oatp58DcRnaiHandGal4_06_1wf_C11440_30s_240418	0.633	Oatp58DcRnaiHandGal4	6	240418	1	f	random	1.25877	1.26927	0.0520813	0.0410325				0.79571	0.787866	0.0326723	0.0414693				0.595984	0.596632	0.0329737	0.0552665	0.748996	21.4554				0.199703	0.198874	0.00308448	0.0155098	0.250975	7.38902			0.0414693	0.335082	93.8208	67.1099	80.4654	64.7643	35.5383	50.1513	0.376734
Oatp58DcRnaiHandGal4_07_1wf_C11440_30s_240418	0.633	Oatp58DcRnaiHandGal4	7	240418	1	f	random	0.802756	0.806998	0.0876015	0.108552				1.26142	1.23916	0.146772	0.118445				1.0722	1.04794	0.146308	0.139615	0.849989	24.6605				0.188991	0.191216	0.00715584	0.0374228	0.149824	4.53579			0.118445	0.176265	72.784	63.4549	68.1194	49.5401	41.1888	45.3644	0.334046
Oatp58DcRnaiHandGal4_08_1wf_C11440_30s_240418	0.633	Oatp58DcRnaiHandGal4	8	240418	1	f	random	1.61443	1.57517	0.172119	0.109271				0.625724	0.634856	0.0616971	0.0971828				0.428509	0.435976	0.0525216	0.120469	0.684822	20.1399				0.197083	0.198874	0.0108728	0.0546718	0.314969	9.26292			0.0971828	0.459928	91.5227	88.8458	90.1842	63.6157	57.884	60.7499	0.32638
Oatp58DcRnaiHandGal4_09_1wf_C11440_30s_240418	0.633	Oatp58DcRnaiHandGal4	9	240418	1	f	random	1.28876	1.28173	0.0459858	0.035878				0.776893	0.780198	0.0272596	0.0349393				0.585046	0.588959	0.0257951	0.0437979	0.753059	21.6467				0.19183	0.191229	0.00447322	0.023392	0.24692	7.28955			0.0349393	0.327889	84.8598	84.0938	84.4768	61.4141	57.2401	59.3271	0.297711
Oatp58DcRnaiHandGal4_10_1wf_C11440_30s_240418	0.633	Oatp58DcRnaiHandGal4	10	240418	1	f	random	1.00278	0.997974	0.0831816	0.0833505				1.00413	1.00203	0.0836944	0.0835248				0.839809	0.833739	0.0848846	0.101812	0.836352	24.3544				0.164324	0.160648	0.00530324	0.0330115	0.163648	4.7654			0.0835248	0.195668	95.6354	87.3907	91.513	70.9412	55.7615	63.3514	0.307734
Oatp58DcRnaiHandGal4_11_1wf_C11440_30s_240418	0.633	Oatp58DcRnaiHandGal4	11	240418	1	f	random	1.26596	1.24509	0.633619	0.508893				1.07998	0.810783	0.850865	1.04944				0.888165	0.60428	0.852164	1.41022	0.822389	23.0923				0.192078	0.191225	0.0137293	0.0717967	0.177853	5.18611			1.04944	0.216264	72.1648	69.6415	70.9031	52.5428	51.2769	51.9099	0.267876
Oatp58DcRnaiHandGal4_12_1wf_C11440_30s_240418	0.633	Oatp58DcRnaiHandGal4	12	240418	1	f	random	2.18982	2.17893	0.0655021	0.0300616				0.457029	0.458942	0.0127547	0.0277914				0.250508	0.25242	0.0127541	0.0505273	0.548122	16.0325				0.206521	0.20652	0.00232356	0.011251	0.451877	13.4239			0.0277914	0.82441	106.496	77.4359	91.9662	74.7047	46.9104	60.8076	0.338805
Oatp58DcRnaiHandGal4_13_1wf_C11440_30s_240418	0.633	Oatp58DcRnaiHandGal4	13	240418	1	f	random	1.1664	1.23332	0.162399	0.131676				0.87338	0.810818	0.141735	0.174805				0.702139	0.642502	0.138162	0.215038	0.803933	23.8727				0.168949	0.168275	0.00434564	0.0258246	0.193443	5.74427			0.174805	0.24062	84.8149	90.3218	87.5684	58.2807	61.5607	59.9207	0.315727
Oatp58DcRnaiHandGal4_14_1wf_C11440_30s_240418	0.633	Oatp58DcRnaiHandGal4	14	240418	1	f	random	1.83912	1.89469	0.322887	0.170417				0.593717	0.527792	0.313936	0.59481				0.411206	0.351851	0.311036	0.883999	0.692595	20.5603				0.182512	0.183577	0.00639581	0.03484	0.307405	9.12558			0.59481	0.443845	70.9412	79.1351	75.0382	50.406	53.8199	52.113	0.305514
Oatp58DcRnaiHandGal4_15_1wf_C11440_30s_240418	0.633	Oatp58DcRnaiHandGal4	15	240418	1	f	random	1.45326	1.48566	0.487383	0.328059				0.812071	0.703725	0.473091	0.672266				0.643584	0.535435	0.469943	0.877685	0.792522	23.169				0.168482	0.168274	0.0118647	0.070508	0.207471	6.23382			0.672266	0.261786	83.0413	78.2978	80.6695	62.7469	52.3097	57.5283	0.286865
Oatp58DcRnaiHandGal4_01_1wf_C11440_30s_260418	0.633	Oatp58DcRnaiHandGal4	1	260418	1	f	random	1.35308	1.36179	0.0453893	0.0333305				0.739852	0.741953	0.0243406	0.0328061				0.572154	0.573676	0.02351	0.0409812	0.773335	22.8861				0.167699	0.16827	0.00401068	0.0238348	0.226665	6.70795			0.0328061	0.293101	96.9007	68.5074	82.7041	72.8198	50.151	61.4854	0.256561
Oatp58DcRnaiHandGal4_02_1wf_C11440_30s_260418	0.633	Oatp58DcRnaiHandGal4	2	260418	1	f	random	1.9815	2.01136	0.135825	0.0675292				0.507078	0.497179	0.0374342	0.0752932				0.36346	0.35187	0.0350189	0.0995224	0.716773	21.0807				0.143647	0.145323	0.00571991	0.03936	0.283283	8.47516			0.0752932	0.39522	85.2202	72.2064	78.7133	59.2083	43.0487	51.1285	0.350447
Oatp58DcRnaiHandGal4_03_1wf_C11440_30s_260418	0.633	Oatp58DcRnaiHandGal4	3	260418	1	f	random	1.28115	1.36183	0.36069	0.264858				0.898043	0.772551	0.496635	0.642851				0.719936	0.558362	0.501002	0.897271	0.801672	23.7579				0.170829	0.168278	0.016577	0.0985098	0.190223	5.63735			0.642851	0.237283	77.8616	60.8207	69.3412	56.3406	40.7536	48.5471	0.299881
Oatp58DcRnaiHandGal4_04_1wf_C11440_30s_260418	0.633	Oatp58DcRnaiHandGal4	4	260418	1	f	random	2.55457	2.72379	0.537132	0.1972				0.40986	0.367144	0.102563	0.279354				0.199818	0.198853	0.0351904	0.176967	0.487528	14.5867				0.210666	0.175903	0.0743286	0.422554	0.513996	15.168			0.279354	1.05429	79.3273	66.9455	73.1364	55.578	42.4441	49.011	0.329869
Oatp58DcRnaiHandGal4_05_1wf_C11440_30s_260418	0.633	Oatp58DcRnaiHandGal4	5	260418	1	f	random	1.15674	1.22184	0.237109	0.194058				0.910474	0.818464	0.257743	0.314911				0.737416	0.657816	0.245901	0.373814	0.809926	23.5973				0.173376	0.168291	0.0126255	0.0750218	0.190424	5.7214			0.314911	0.235112	77.2493	69.8627	73.556	60.7713	52.5543	56.6628	0.229665
Oatp58DcRnaiHandGal4_06_1wf_C11440_30s_260418	0.633	Oatp58DcRnaiHandGal4	6	260418	1	f	random	1.4954	1.46898	0.169251	0.115217				0.676495	0.680744	0.070451	0.103491				0.514746	0.520117	0.0686149	0.131922	0.760901	22.6488				0.160977	0.160633	0.00489724	0.0304871	0.237957	7.08298			0.103491	0.312731	82.2924	70.9073	76.5999	60.8207	52.6342	56.7275	0.259431
Oatp58DcRnaiHandGal4_07_1wf_C11440_30s_260418	0.633	Oatp58DcRnaiHandGal4	7	260418	1	f	random	1.25297	1.25706	0.0512552	0.040774				0.799428	0.795509	0.0327677	0.0411908				0.615851	0.611904	0.0326752	0.0533991	0.770364	22.7865				0.183577	0.183575	0.00470808	0.0256467	0.229636	6.79235			0.0411908	0.298087	86.7233	78.6985	82.7109	62.6958	54.3385	58.5172	0.29251
Oatp58DcRnaiHandGal4_08_1wf_C11440_30s_260418	0.633	Oatp58DcRnaiHandGal4	8	260418	1	f	random	1.44672	1.43661	0.131211	0.0913332				0.696791	0.703712	0.0621854	0.0883676				0.515034	0.527768	0.0614602	0.116453	0.739152	21.6314				0.181799	0.183561	0.00594177	0.0323694	0.260909	7.81734			0.0883676	0.352984	85.0131	71.529	78.2711	55.2018	47.9829	51.5924	0.34085
Oatp58DcRnaiHandGal4_09_1wf_C11440_30s_260418	0.633	Oatp58DcRnaiHandGal4	9	260418	1	f	random	0.984016	0.982983	0.107927	0.109795				1.02852	1.02497	0.113	0.110247				0.853964	0.849064	0.109802	0.129322	0.830283	23.911				0.174869	0.175925	0.00778298	0.0442402	0.170019	5.07119			0.110247	0.204773	86.1252	71.8085	78.9669	63.3127	47.8156	55.5641	0.296362
Oatp58DcRnaiHandGal4_10_1wf_C11440_30s_260418	0.633	Oatp58DcRnaiHandGal4	10	260418	1	f	random	1.7879	1.84126	0.200156	0.108706				0.566028	0.550747	0.0642732	0.116702				0.414522	0.405405	0.0630008	0.155402	0.732335	21.5552				0.151534	0.152974	0.00996862	0.0651654	0.267714	8.0313			0.116702	0.365563	89.9773	78.4946	84.2359	68.2291	57.6899	62.9595	0.252582
Oatp58DcRnaiHandGal4_11_1wf_C11440_30s_260418	0.633	Oatp58DcRnaiHandGal4	11	260418	1	f	random	1.87878	1.86763	0.0687521	0.0368125				0.532929	0.535439	0.0187355	0.034991				0.329187	0.336544	0.0192618	0.0572341	0.617694	18.1053				0.203655	0.206516	0.00530908	0.0257078	0.382142	11.4047			0.034991	0.618659	83.4648	78.4358	80.9503	59.6668	49.3293	54.4981	0.326772
Oatp58DcRnaiHandGal4_12_1wf_C11440_30s_260418	0.633	Oatp58DcRnaiHandGal4	12	260418	1	f	random	1.32361	1.3908	0.399623	0.287333				0.843797	0.71901	0.333651	0.464041				0.665253	0.543098	0.330064	0.607742	0.788404	23.9491				0.167842	0.160656	0.0159797	0.0994656	0.198913	5.87447			0.464041	0.252298	75.3376	77.9002	76.6189	52.5543	56.369	54.4616	0.289188
Oatp58DcRnaiHandGal4_13_1wf_C11440_30s_260418	0.633	Oatp58DcRnaiHandGal4	13	260418	1	f	random	1.00702	1.0459	0.18542	0.177283				1.0295	0.956119	0.218888	0.228934				0.842528	0.772542	0.214565	0.277739	0.818383	22.7482				0.186854	0.183585	0.0106195	0.0578451	0.181499	5.23191			0.228934	0.221778	81.6791	71.0343	76.3567	59.5323	46.9957	53.264	0.302432
Oatp58DcRnaiHandGal4_14_1wf_C11440_30s_260418	0.633	Oatp58DcRnaiHandGal4	14	260418	1	f	random	0.962528	0.9543	0.0577572	0.0605231				1.04245	1.05553	0.0608696	0.0576675				0.875272	0.887308	0.0607105	0.068421	0.839626	24.5076				0.167219	0.168264	0.00401237	0.0238456	0.160409	4.84934			0.0576675	0.191048	86.2368	84.2104	85.2236	66.0265	60.8207	63.4236	0.255798
Oatp58DcRnaiHandGal4_15_1wf_C11440_30s_260418	0.633	Oatp58DcRnaiHandGal4	15	260418	1	f	random	2.42413	2.37702	0.29316	0.123331				0.417855	0.428338	0.0464	0.108326				0.241104	0.244753	0.045223	0.18477	0.577003	17.1184				0.176361	0.175932	0.00287137	0.0163209	0.422062	12.5216			0.108326	0.731472	73.4526	80.9498	77.2012	51.2769	59.9849	55.6309	0.279403
[truncated: 36 more columns]

## Sheet: data_random_06_07_18
File.Name	Scale.Factor	GenoType	ID	Comments	Age	Sex	Type	Heart.Rate.Mean	Heart.Rate.Median	Heart.Rate.Stddev	Heart.Rate.SDonMean				Heart.Period.Mean	Heart.Period.Median	Heart.Period.Stddev	Heart.Period.SDonMean				Diastolic.Interval.Mean	Diastolic.Interval.Median	Diastolic.Interval.Stddev	Diastolic.Interval.SDonMean	DIonHPmean	Diastolic.Interval.TotalTime				Systolic.Interval.Mean	Systolic.Interval.Median	Systolic.Interval.Stddev	Systolic.Interval.SDonMean	SIonHPmean	Systolic.Interval.TotalTime	SIAI		Arrhythmia.Index	SIMean.on.DIMean	1st.Diastolic.Diameter.Vertical	2nd.Diastolic.Diameter.Vertical	Avg.Diastolic.Diameter	1st.Systolic.Diameter.Vertical	2nd.Systolic.Diameter.Vertical	Avg.Systolic.Diameter	Fractional.Shortening	1stDiastolicHorizontal	DiastolicSurfaceArea(mm^2)
CG17065RnaiHandGal4_01_1wf_C11440_30s_070618	0.633	CG17065RnaiHandGal4	1	70618	1	f	random	2.06511	2.10866	0.203051	0.0962939				0.488784	0.474235	0.0497849	0.104979				0.323395	0.305971	0.051495	0.1683	0.661631	19.7271				0.165389	0.168259	0.00578737	0.0343957	0.338369	10.0887			0.104979	0.511415	84.3055	69.6415	76.9735	57.1421	48.1746	52.6583	0.31589
CG17065RnaiHandGal4_02_1wf_C11440_30s_070618	0.633	CG17065RnaiHandGal4	2	70618	1	f	random	2.7338	2.66813	0.150948	0.0565744				0.36668	0.374795	0.0196385	0.0523979				0.199628	0.206506	0.0191346	0.0926589	0.54442	16.1698				0.167052	0.168276	0.00329055	0.0195545	0.45558	13.5312			0.0523979	0.836819	67.0532	64.5784	65.8158	51.5225	48.212	49.8672	0.242321
CG17065RnaiHandGal4_03_1wf_C11440_30s_070618	0.633	CG17065RnaiHandGal4	3	70618	1	f	random	2.43981	2.25401	0.78775	0.349488				0.433406	0.443656	0.0787701	0.177548				0.282014	0.290675	0.076443	0.262984	0.650693	19.459				0.151856	0.152971	0.00870217	0.0568876	0.350378	10.3262			0.177548	0.538469	92.2118	75.3376	83.7747	64.8756	44.5984	54.737	0.346617
CG17065RnaiHandGal4_04_1wf_C11440_30s_070618	0.633	CG17065RnaiHandGal4	4	70618	1	f	random	4.34577	4.35786	0.0781208	0.0179264				0.230182	0.22947	0.00415074	0.0180884				0.140055	0.145329	0.0168093	0.115664	0.608454	18.0671				0.0900806	0.0841408	0.0176103	0.209296	0.391346	11.7105			0.0180884	0.643181	89.9951	74.7369	82.366	62.0857	50.011	56.0483	0.319521
CG17065RnaiHandGal4_05_1wf_C11440_30s_070618	0.633	CG17065RnaiHandGal4	5	70618	1	f	random	2.15957	2.17883	0.0473998	0.0217547				0.463242	0.466564	0.00983812	0.0210863				0.318859	0.321251	0.00887391	0.027623	0.68832	20.407				0.144383	0.145329	0.00270221	0.0185938	0.31168	9.24051			0.0210863	0.452812	99.5442	70.3086	84.9264	64.3111	48.1455	56.2283	0.337918
CG17065RnaiHandGal4_06_1wf_C11440_30s_070618	0.633	CG17065RnaiHandGal4	6	70618	1	f	random	2.37085	2.37699	0.253166	0.106507				0.42657	0.4207	0.0456437	0.108495				0.266074	0.267706	0.0458126	0.17113	0.623752	18.6252				0.159756	0.160627	0.00659186	0.0410382	0.374514	11.183			0.108495	0.600421	86.1717	74.5168	80.3443	61.4304	47.1872	54.3088	0.324049
CG17065RnaiHandGal4_07_1wf_C11440_30s_070618	0.633	CG17065RnaiHandGal4	7	70618	1	f	random	1.48988	1.48568	0.0404912	0.0272543				0.671689	0.673093	0.0183679	0.0272888				0.500208	0.497185	0.0185556	0.0373214	0.744703	21.509				0.171408	0.168297	0.00488357	0.0290176	0.25519	7.54195			0.0272888	0.342673	84.8598	78.1159	81.4878	54.4711	44.1333	49.3022	0.394975
CG17065RnaiHandGal4_08_1wf_C11440_30s_070618	0.633	CG17065RnaiHandGal4	8	70618	1	f	random	1.40368	1.18851	0.712498	0.599487				0.788696	0.841389	0.180562	0.2146				0.536466	0.52015	0.159837	0.30729	0.680193	19.8492				0.256342	0.1836	0.116459	0.634307	0.32502	9.48466			0.2146	0.477835	95.3059	80.4134	87.8597	59.7339	55.8333	57.7836	0.342319
CG17065RnaiHandGal4_09_1wf_C11440_30s_070618	0.633	CG17065RnaiHandGal4	9	70618	1	f	random	1.48585	1.48565	0.114818	0.0772847				0.677203	0.673105	0.05465	0.0811909				0.477083	0.47423	0.054265	0.114428	0.704491	20.5146				0.200091	0.198877	0.00304862	0.0153291	0.295467	8.80403			0.0811909	0.419406	99.5562	90.2064	94.8813	78.7061	64.3827	71.5444	0.245959
CG17065RnaiHandGal4_10_1wf_C11440_30s_070618	0.633	CG17065RnaiHandGal4	10	70618	1	f	random	4.14141	4.08591	0.0899657	0.0220185				0.241534	0.244743	0.00523716	0.0213986				0.111067	0.114718	0.00588171	0.0512708	0.459839	13.6612				0.130464	0.130032	0.00394615	0.0303477	0.540146	16.1775			0.0213986	1.17464	78.1697	81.3128	79.7413	57.1946	58.6918	57.9432	0.27336
CG17065RnaiHandGal4_11_1wf_C11440_30s_070618	0.633	CG17065RnaiHandGal4	11	70618	1	f	random	2.91887	2.9054	0.0685682	0.0236003				0.342782	0.344189	0.00807796	0.0234696				0.186777	0.183592	0.00823931	0.0448784	0.544886	16.0628				0.156058	0.152998	0.00484013	0.0316352	0.455269	13.577			0.0234696	0.83553	91.9246	70.2744	81.0995	69.7019	48.1122	58.907	0.273645
CG17065RnaiHandGal4_12_1wf_C11440_30s_070618	0.633	CG17065RnaiHandGal4	12	70618	1	f	random	1.11928	1.13683	0.140762	0.12382				0.910231	0.887268	0.139542	0.157271				0.73263	0.71134	0.13611	0.191344	0.804884	23.4442				0.177549	0.175926	0.00580454	0.0329941	0.19506	5.85913			0.157271	0.242345	102.595	91.4899	97.0423	74.2339	58.8145	66.5242	0.314482
CG17065RnaiHandGal4_13_1wf_C11440_30s_070618	0.633	CG17065RnaiHandGal4	13	70618	1	f	random	1.70106	1.5202	0.561607	0.369431				0.639855	0.673082	0.176433	0.262127				0.440312	0.474245	0.176162	0.371458	0.688143	20.2543				0.199204	0.206517	0.0146675	0.0710233	0.311327	9.36259			0.262127	0.452416	92.4267	92.4375	92.4321	63.3032	50.043	56.6731	0.386868
CG17065RnaiHandGal4_14_1wf_C11440_30s_070618	0.633	CG17065RnaiHandGal4	14	70618	1	f	random	1.50064	1.5028	0.0862798	0.0574127				0.668591	0.665449	0.0385942	0.0579972				0.505353	0.504814	0.0397641	0.0787697	0.755848	22.2355				0.163181	0.160633	0.00747672	0.0465453	0.244066	7.34312			0.0579972	0.322904	84.8433	87.7407	86.292	58.9234	61.95	60.4367	0.299626
CG17065RnaiHandGal4_15_1wf_C11440_30s_070618	0.633	CG17065RnaiHandGal4	15	70618	1	f	random	1.75809	1.6979	0.27503	0.161982				0.577724	0.588963	0.06159	0.104574				0.400594	0.41307	0.0640621	0.155088	0.693399	20.4303				0.177107	0.175898	0.0182493	0.103749	0.30656	9.20959			0.104574	0.442112	94.9521	75.327	85.1396	58.954	48.1122	53.5331	0.371231
CG17065RnaiHandGal4_01_1wf_C11440_30s_080618	0.633	CG17065RnaiHandGal4	1	80618	1	f	random	2.2488	2.25409	0.299517	0.132877				0.452581	0.443638	0.0605554	0.136497				0.299351	0.298306	0.0554377	0.185842	0.66143	19.7572				0.151705	0.152952	0.0107743	0.0704421	0.335199	10.0125			0.136497	0.506779	91.8919	84.3055	88.0987	64.2456	58.9234	61.5845	0.30096
CG17065RnaiHandGal4_02_1wf_C11440_30s_080618	0.633	CG17065RnaiHandGal4	2	80618	1	f	random	1.86368	1.84136	0.118996	0.0646238				0.538624	0.543076	0.0331038	0.0609561				0.35922	0.359503	0.0308044	0.085686	0.666922	19.7571				0.179478	0.183573	0.00969737	0.0528257	0.333216	10.0508			0.0609561	0.499632	85.5019	85.6891	85.5955	65.3555	62.782	64.0688	0.251494
CG17065RnaiHandGal4_03_1wf_C11440_30s_080618	0.633	CG17065RnaiHandGal4	3	80618	1	f	random	1.46033	1.45266	0.0810266	0.0557783				0.686803	0.688395	0.036866	0.0535536				0.500203	0.497187	0.0377412	0.0759096	0.728308	21.5088				0.186531	0.183578	0.00929634	0.0506396	0.271593	8.20736			0.0535536	0.37291	73.8877	71.6661	72.7769	44.531	46.9488	45.7399	0.371505
CG17065RnaiHandGal4_04_1wf_C11440_30s_080618	0.633	CG17065RnaiHandGal4	4	80618	1	f	random	2.76234	2.61485	0.686385	0.262495				0.383738	0.382431	0.0917747	0.239977				0.212597	0.191227	0.0775291	0.40543	0.554016	16.5826				0.169457	0.137672	0.0718317	0.521758	0.441595	13.2176			0.239977	0.79708	91.7129	84.2104	87.9617	54.8815	44.9831	49.9323	0.43234
CG17065RnaiHandGal4_05_1wf_C11440_30s_080618	0.633	CG17065RnaiHandGal4	5	80618	1	f	random	2.17879	2.17894	0.0297696	0.0136624				0.459055	0.458939	0.00626849	0.0136587				0.283011	0.28301	0.00629359	0.0222381	0.616508	18.3957				0.175924	0.175924	0.00382286	0.0217302	0.38323	11.2591			0.0136587	0.621614	78.0235	89.9773	84.0004	56.511	56.7657	56.6383	0.325738
CG17065RnaiHandGal4_06_1wf_C11440_30s_080618	0.633	CG17065RnaiHandGal4	6	80618	1	f	random	4.81821	4.84192	0.107767	0.0222572				0.207644	0.20653	0.00465522	0.0225402				0.0817842	0.0841303	0.00978403	0.116296	0.393866	11.6951				0.125783	0.130018	0.0105445	0.0811004	0.605762	18.1128			0.0225402	1.53799	91.9246	85.6891	88.8069	59.6231	58.3219	58.9725	0.335946
CG17065RnaiHandGal4_07_1wf_C11440_30s_080618	0.633	CG17065RnaiHandGal4	7	80618	1	f	random	2.16428	2.1789	0.0617312	0.0283314				0.462402	0.45895	0.0132779	0.0289311				0.301776	0.298324	0.0135523	0.0454281	0.652627	19.3137				0.160509	0.160629	0.00592279	0.0368724	0.347119	10.4331			0.0289311	0.53188	89.8882	85.6049	87.7466	63.9455	57.7732	60.8594	0.306419
CG17065RnaiHandGal4_09_1wf_C11440_30s_080618	0.633	CG17065RnaiHandGal4	9	80618	1	f	random	1.88066	1.86767	0.115243	0.0617042				0.5332	0.535425	0.0244528	0.0456698				0.355741	0.359495	0.0244281	0.0679512	0.667182	19.5658				0.177295	0.175927	0.00867336	0.0493008	0.332512	9.92855			0.0456698	0.498383	108.31	104.581	106.445	78.6552	73.4116	76.0334	0.285705
CG17065RnaiHandGal4_10_1wf_C11440_30s_080618	0.633	CG17065RnaiHandGal4	10	80618	1	f	random	1.05513	1.03759	0.087038	0.0838848				0.953403	0.963772	0.0712786	0.0739579				0.786607	0.795486	0.0698572	0.087817	0.825052	24.3848				0.166603	0.168271	0.00357689	0.0212567	0.174746	5.3313			0.0739579	0.2118	92.4527	93.7032	93.078	70.3656	62.8235	66.5945	0.28453
CG17065RnaiHandGal4_11_1wf_C11440_30s_080618	0.633	CG17065RnaiHandGal4	11	80618	1	f	random	2.50474	2.51405	0.111368	0.0442983				0.40005	0.397765	0.0183893	0.0462315				0.237944	0.237122	0.0183098	0.077217	0.594787	17.6079				0.162177	0.160631	0.00366206	0.022798	0.405392	12.0011			0.0462315	0.681576	81.8139	76.7602	79.287	57.0965	53.7118	55.4041	0.301221
CG17065RnaiHandGal4_12_1wf_C11440_30s_080618	0.633	CG17065RnaiHandGal4	12	80618	1	f	random	1.5865	1.55646	0.116437	0.0748087				0.633365	0.650137	0.0462572	0.07115				0.449174	0.45895	0.0441813	0.096266	0.709186	21.1112				0.18457	0.183576	0.00813464	0.0443121	0.291411	8.49021			0.07115	0.41091	96.9813	95.6019	96.2916	58.2394	60.1483	59.1939	0.385264
CG17065RnaiHandGal4_13_1wf_C11440_30s_080618	0.633	CG17065RnaiHandGal4	13	80618	1	f	random	2.00671	2.01122	0.117225	0.0582857				0.500033	0.497211	0.0294354	0.0592011				0.326962	0.328878	0.0282511	0.0859013	0.65388	19.2907				0.172992	0.175907	0.00492722	0.0280103	0.345961	10.3795			0.0592011	0.529089	94.9838	76.6165	85.8001	67.2054	50.6756	58.9405	0.313049
CG17065RnaiHandGal4_14_1wf_C11440_30s_080618	0.633	CG17065RnaiHandGal4	14	80618	1	f	random	2.05517	2.04278	0.0771024	0.0377438				0.487237	0.489531	0.0179923	0.0367541				0.335299	0.336554	0.017685	0.0525474	0.688164	20.4532				0.151725	0.152978	0.00309413	0.0202259	0.311399	9.25524			0.0367541	0.452507	95.7903	80.4807	88.1355	70.1489	55.2018	62.6753	0.288875
CG17065RnaiHandGal4_15_1wf_C11440_30s_080618	0.633	CG17065RnaiHandGal4	15	80618	1	f	random	1.52765	1.52022	0.0490794	0.0322845				0.655259	0.657801	0.0209279	0.0318149				0.488003	0.489511	0.0213029	0.0435187	0.744748	21.9601				0.167112	0.168271	0.00373912	0.0222208	0.255031	7.68713			0.0318149	0.34244	96.8511	84.8314	90.8413	73.4526	63.3032	68.3779	0.247282
UASGFPVal10RnaiHandGal4_01_1wf_C11440_30s_070618	0.633	UASGFPVal10HandGal4	1	70618	1	f	control	2.57225	2.56343	0.120151	0.0468714				0.389596	0.390105	0.0178752	0.0458216				0.241044	0.244758	0.0171701	0.0701515	0.618703	18.3193				0.148552	0.145348	0.00690012	0.0474732	0.381297	11.2899			0.0458216	0.616284	86.9517	87.4663	87.209	67.6807	69.0434	68.3621	0.216112
UASGFPVal10RnaiHandGal4_02_1wf_C11440_30s_070618	0.633	UASGFPVal10HandGal4	2	70618	1	f	control	2.12496	2.14318	0.0511136	0.0238494				0.470839	0.466597	0.0115213	0.0246922				0.319681	0.321238	0.00867029	0.0269903	0.67896	20.1399				0.151067	0.152966	0.00540357	0.0353254	0.320846	9.66828			0.0246922	0.472556	81.0636	79.7178	80.3907	53.8087	51.6623	52.7355	0.34401
UASGFPVal10RnaiHandGal4_03_1wf_C11440_30s_070618	0.633	UASGFPVal10HandGal4	3	70618	1	f	control	2.8653	2.84222	0.0640207	0.0225248				0.349154	0.351837	0.00768618	0.0218458				0.214894	0.214178	0.00812914	0.0379551	0.615469	18.266				0.13426	0.137661	0.00510182	0.0370608	0.384531	11.4121			0.0218458	0.624776	64.5691	56.337	60.4531	48.741	33.5729	41.1569	0.319192
UASGFPVal10RnaiHandGal4_04_1wf_C11440_30s_070618	0.633	UASGFPVal10HandGal4	4	70618	1	f	control	3.33094	3.35214	0.0654143	0.0195142				0.30032	0.298317	0.005954	0.0199586				0.174225	0.175913	0.00595259	0.0338383	0.580133	17.2483				0.126134	0.122408	0.00576059	0.0470606	0.419998	12.6134			0.0199586	0.723968	88.629	86.7302	87.6796	72.8198	69.676	71.2479	0.187407
UASGFPVal10RnaiHandGal4_05_1wf_C11440_30s_070618	0.633	UASGFPVal10HandGal4	5	70618	1	f	control	3.61675	3.63147	0.0659881	0.0181712				0.276579	0.275371	0.00506557	0.0183955				0.150574	0.152969	0.00560116	0.0366163	0.544416	16.262				0.126028	0.122408	0.00526326	0.0429977	0.455665	13.4849			0.0183955	0.83698	96.2493	93.1973	94.7233	64.5939	58.6508	61.6224	0.349449
UASGFPVal10RnaiHandGal4_06_1wf_C11440_30s_070618	0.633	UASGFPVal10HandGal4	6	70618	1	f	control	3.17531	3.11278	0.315018	0.101202				0.317392	0.321256	0.0258119	0.0803468				0.18078	0.183582	0.0297209	0.161894	0.569579	16.8125				0.136705	0.145313	0.0160814	0.110667	0.430715	12.8503			0.0803468	0.756199	83.5656	77.8616	80.7136	55.7184	45.5936	50.656	0.372398
UASGFPVal10RnaiHandGal4_07_1wf_C11440_30s_070618	0.633	UASGFPVal10HandGal4	7	70618	1	f	control	2.64853	2.66793	0.0423895	0.0158885				0.377645	0.374826	0.00605153	0.0161449				0.239444	0.237132	0.00677084	0.028553	0.634047	18.9161				0.138164	0.137681	0.00394248	0.0286349	0.365858	10.915			0.0161449	0.57702	82.29	78.1569	80.2235	53.8087	51.9292	52.8689	0.340979
UASGFPVal10RnaiHandGal4_08_1wf_C11440_30s_070618	0.633	UASGFPVal10HandGal4	8	70618	1	f	control	1.93909	1.92263	0.0847723	0.044092				0.516643	0.520122	0.0221496	0.0425853				0.3693	0.374786	0.0207819	0.0554501	0.714808	21.0501				0.14744	0.145344	0.00634758	0.0436729	0.28538	8.5515			0.0425853	0.39924	95.7924	92.7426	94.2675	66.4771	69.307	67.892	0.279794
UASGFPVal10RnaiHandGal4_09_1wf_C11440_30s_070618	0.633	UASGFPVal10HandGal4	9	70618	1	f	control	3.24034	3.26826	0.0529438	0.0161994				0.308669	0.305974	0.00505434	0.0165189				0.17202	0.168303	0.00566734	0.0336735	0.557295	16.5139				0.13666	0.137683	0.00279969	0.0203344	0.44274	13.256			0.0165189	0.794446	75.4227		75.4227	49.4753		49.4753	0.344026
UASGFPVal10RnaiHandGal4_10_1wf_C11440_30s_070618	0.633	UASGFPVal10HandGal4	10	70618	1	f	control	2.77869	2.72377	0.133654	0.0490696				0.360529	0.36714	0.016177	0.0440622				0.221356	0.229454	0.01665	0.0725636	0.613974	18.1512				0.139156	0.137684	0.00335638	0.0243774	0.385976	11.5499			0.0440622	0.628652	101.984	79.768	90.8759	73.4716	49.3902	61.4309	0.324013
UASGFPVal10RnaiHandGal4_11_1wf_C11440_30s_070618	0.633	UASGFPVal10HandGal4	11	70618	1	f	control	2.39076	2.42087	0.125699	0.051923				0.419602	0.413074	0.0271147	0.0656412				0.286459	0.283011	0.0239817	0.0847376	0.682691	20.3386				0.133531	0.130052	0.00796464	0.0612422	0.318232	9.34715			0.0656412	0.466143	72.9709	82.4457	77.7083	48.0788	52.5543	50.3165	0.352495
UASGFPVal10RnaiHandGal4_12_1wf_C11440_30s_070618	0.633	UASGFPVal10HandGal4	12	70618	1	f	control	1.51218	1.50267	0.061738	0.0410856				0.662334	0.673089	0.0278608	0.0413925				0.49735	0.504819	0.0262488	0.0519966	0.750906	22.3808				0.164883	0.168266	0.0050898	0.0302485	0.248942	7.41973			0.0413925	0.331523	81.7183	88.7307	85.2245	59.5861	61.1656	60.3759	0.291567
UASGFPVal10RnaiHandGal4_13_1wf_C11440_30s_070618	0.633	UASGFPVal10HandGal4	13	70618	1	f	control	1.65714	1.65493	0.0544755	0.0329171				0.604112	0.604276	0.0202067	0.0334395				0.437582	0.443571	0.0212717	0.0479557	0.724339	21.0039				0.166565	0.168282	0.00362716	0.0215541	0.275719	8.16169			0.0334395	0.380649	94.9521	99.4777	97.2149	70.2887	68.601	69.4448	0.285657
UASGFPVal10RnaiHandGal4_14_1wf_C11440_30s_070618	0.633	UASGFPVal10HandGal4	14	70618	1	f	control	1.78604	1.74307	0.135873	0.0779503				0.562643	0.581299	0.0424578	0.0730396				0.405838	0.420697	0.0392188	0.0932234	0.721307	21.1036				0.156877	0.160614	0.00574541	0.0357715	0.278822	8.31447			0.0730396	0.386551	83.0775	83.5944	83.3359	56.0625	58.2498	57.1561	0.314148
UASGFPVal10RnaiHandGal4_15_1wf_C11440_30s_070618	0.633	UASGFPVal10HandGal4	15	70618	1	f	control	1.92141	1.92259	0.0513037	0.0266847				0.520814	0.520134	0.0136747	0.0262907				0.350217	0.351852	0.0122627	0.0348518	0.672442	19.6122				0.170557	0.16829	0.00581326	0.0345432	0.327481	9.72173			0.0262907	0.487003	95.1629	82.9327	89.0478	68.484	52.6	60.542	0.320118
UASGFPVal10RnaiHandGal4_01_1wf_C11440_30s_070618	0.633	UASGFPVal10HandGal4	1	70618	1	f	control	2.57225	2.56343	0.120151	0.0468714				0.389596	0.390105	0.0178752	0.0458216				0.241044	0.244758	0.0171701	0.0701515	0.618703	18.3193				0.148552	0.145348	0.00690012	0.0474732	0.381297	11.2899			0.0458216	0.616284	86.9517	87.4663	87.209	67.6807	69.0434	68.3621	0.216112
UASGFPVal10RnaiHandGal4_02_1wf_C11440_30s_070618	0.633	UASGFPVal10HandGal4	2	70618	1	f	control	2.12496	2.14318	0.0511136	0.0238494				0.470839	0.466597	0.0115213	0.0246922				0.319681	0.321238	0.00867029	0.0269903	0.67896	20.1399				0.151067	0.152966	0.00540357	0.0353254	0.320846	9.66828			0.0246922	0.472556	81.0636	79.7178	80.3907	53.8087	51.6623	52.7355	0.34401
UASGFPVal10RnaiHandGal4_03_1wf_C11440_30s_070618	0.633	UASGFPVal10HandGal4	3	70618	1	f	control	2.8653	2.84222	0.0640207	0.0225248				0.349154	0.351837	0.00768618	0.0218458				0.214894	0.214178	0.00812914	0.0379551	0.615469	18.266				0.13426	0.137661	0.00510182	0.0370608	0.384531	11.4121			0.0218458	0.624776	64.5691	56.337	60.4531	48.741	33.5729	41.1569	0.319192
UASGFPVal10RnaiHandGal4_04_1wf_C11440_30s_070618	0.633	UASGFPVal10HandGal4	4	70618	1	f	control	3.33094	3.35214	0.0654143	0.0195142				0.30032	0.298317	0.005954	0.0199586				0.174225	0.175913	0.00595259	0.0338383	0.580133	17.2483				0.126134	0.122408	0.00576059	0.0470606	0.419998	12.6134			0.0199586	0.723968	88.629	86.7302	87.6796	72.8198	69.676	71.2479	0.187407
UASGFPVal10RnaiHandGal4_05_1wf_C11440_30s_070618	0.633	UASGFPVal10HandGal4	5	70618	1	f	control	3.61675	3.63147	0.0659881	0.0181712				0.276579	0.275371	0.00506557	0.0183955				0.150574	0.152969	0.00560116	0.0366163	0.544416	16.262				0.126028	0.122408	0.00526326	0.0429977	0.455665	13.4849			0.0183955	0.83698	96.2493	93.1973	94.7233	64.5939	58.6508	61.6224	0.349449
UASGFPVal10RnaiHandGal4_06_1wf_C11440_30s_070618	0.633	UASGFPVal10HandGal4	6	70618	1	f	control	3.17531	3.11278	0.315018	0.101202				0.317392	0.321256	0.0258119	0.0803468				0.18078	0.183582	0.0297209	0.161894	0.569579	16.8125				0.136705	0.145313	0.0160814	0.110667	0.430715	12.8503			0.0803468	0.756199	83.5656	77.8616	80.7136	55.7184	45.5936	50.656	0.372398
UASGFPVal10RnaiHandGal4_07_1wf_C11440_30s_070618	0.633	UASGFPVal10HandGal4	7	70618	1	f	control	2.64853	2.66793	0.0423895	0.0158885				0.377645	0.374826	0.00605153	0.0161449				0.239444	0.237132	0.00677084	0.028553	0.634047	18.9161				0.138164	0.137681	0.00394248	0.0286349	0.365858	10.915			0.0161449	0.57702	82.29	78.1569	80.2235	53.8087	51.9292	52.8689	0.340979
UASGFPVal10RnaiHandGal4_08_1wf_C11440_30s_070618	0.633	UASGFPVal10HandGal4	8	70618	1	f	control	1.93909	1.92263	0.0847723	0.044092				0.516643	0.520122	0.0221496	0.0425853				0.3693	0.374786	0.0207819	0.0554501	0.714808	21.0501				0.14744	0.145344	0.00634758	0.0436729	0.28538	8.5515			0.0425853	0.39924	95.7924	92.7426	94.2675	66.4771	69.307	67.892	0.279794
UASGFPVal10RnaiHandGal4_09_1wf_C11440_30s_070618	0.633	UASGFPVal10HandGal4	9	70618	1	f	control	3.24034	3.26826	0.0529438	0.0161994				0.308669	0.305974	0.00505434	0.0165189				0.17202	0.168303	0.00566734	0.0336735	0.557295	16.5139				0.13666	0.137683	0.00279969	0.0203344	0.44274	13.256			0.0165189	0.794446	75.4227		75.4227	49.4753		49.4753	0.344026
UASGFPVal10RnaiHandGal4_10_1wf_C11440_30s_070618	0.633	UASGFPVal10HandGal4	10	70618	1	f	control	2.77869	2.72377	0.133654	0.0490696				0.360529	0.36714	0.016177	0.0440622				0.221356	0.229454	0.01665	0.0725636	0.613974	18.1512				0.139156	0.137684	0.00335638	0.0243774	0.385976	11.5499			0.0440622	0.628652	101.984	79.768	90.8759	73.4716	49.3902	61.4309	0.324013
UASGFPVal10RnaiHandGal4_11_1wf_C11440_30s_070618	0.633	UASGFPVal10HandGal4	11	70618	1	f	control	2.39076	2.42087	0.125699	0.051923				0.419602	0.413074	0.0271147	0.0656412				0.286459	0.283011	0.0239817	0.0847376	0.682691	20.3386				0.133531	0.130052	0.00796464	0.0612422	0.318232	9.34715			0.0656412	0.466143	72.9709	82.4457	77.7083	48.0788	52.5543	50.3165	0.352495
UASGFPVal10RnaiHandGal4_12_1wf_C11440_30s_070618	0.633	UASGFPVal10HandGal4	12	70618	1	f	control	1.51218	1.50267	0.061738	0.0410856				0.662334	0.673089	0.0278608	0.0413925				0.49735	0.504819	0.0262488	0.0519966	0.750906	22.3808				0.164883	0.168266	0.0050898	0.0302485	0.248942	7.41973			0.0413925	0.331523	81.7183	88.7307	85.2245	59.5861	61.1656	60.3759	0.291567
UASGFPVal10RnaiHandGal4_13_1wf_C11440_30s_070618	0.633	UASGFPVal10HandGal4	13	70618	1	f	control	1.65714	1.65493	0.0544755	0.0329171				0.604112	0.604276	0.0202067	0.0334395				0.437582	0.443571	0.0212717	0.0479557	0.724339	21.0039				0.166565	0.168282	0.00362716	0.0215541	0.275719	8.16169			0.0334395	0.380649	94.9521	99.4777	97.2149	70.2887	68.601	69.4448	0.285657
UASGFPVal10RnaiHandGal4_14_1wf_C11440_30s_070618	0.633	UASGFPVal10HandGal4	14	70618	1	f	control	1.78604	1.74307	0.135873	0.0779503				0.562643	0.581299	0.0424578	0.0730396				0.405838	0.420697	0.0392188	0.0932234	0.721307	21.1036				0.156877	0.160614	0.00574541	0.0357715	0.278822	8.31447			0.0730396	0.386551	83.0775	83.5944	83.3359	56.0625	58.2498	57.1561	0.314148
UASGFPVal10RnaiHandGal4_15_1wf_C11440_30s_070618	0.633	UASGFPVal10HandGal4	15	70618	1	f	control	1.92141	1.92259	0.0513037	0.0266847				0.520814	0.520134	0.0136747	0.0262907				0.350217	0.351852	0.0122627	0.0348518	0.672442	19.6122				0.170557	0.16829	0.00581326	0.0345432	0.327481	9.72173			0.0262907	0.487003	95.1629	82.9327	89.0478	68.484	52.6	60.542	0.320118
UASGFPVal10RnaiHandGal4_01_1wf_C11440_30s_080618	0.633	UASGFPVal10HandGal4	1	80618	1	f	control	1.85825	1.86773	0.105146	0.0562958				0.539876	0.535408	0.0311844	0.0582443				0.382586	0.38244	0.0347766	0.0909336	0.708655	21.0422				0.15729	0.160616	0.0129611	0.080696	0.291345	8.65097			0.0582443	0.411125	104.462	80.4807	92.4715	79.7982	55.1619	67.48	0.270261
UASGFPVal10RnaiHandGal4_02_1wf_C11440_30s_080618	0.633	UASGFPVal10HandGal4	2	80618	1	f	control	1.65566	1.65494	0.0638255	0.0385668				0.604891	0.604253	0.0233875	0.0387049				0.444265	0.436014	0.0234545	0.0537929	0.734456	21.769				0.160779	0.160628	0.00582791	0.0362819	0.265798	8.03893			0.0387049	0.361898	88.2621	89.1272	88.6946	66.1356	67.3959	66.7658	0.24724
UASGFPVal10RnaiHandGal4_03_1wf_C11440_30s_080618	0.633	UASGFPVal10HandGal4	3	80618	1	f	control	2.12669	2.04286	0.248232	0.121512				0.475098	0.489517	0.0470362	0.0960869				0.299789	0.313578	0.0464964	0.148277	0.631005	18.5869				0.175075	0.175927	0.00740281	0.0420789	0.368503	11.0297			0.0960869	0.583995	98.117	81.5219	89.8195	75.9705	61.1263	68.5484	0.23682
UASGFPVal10RnaiHandGal4_04_1wf_C11440_30s_080618	0.633	UASGFPVal10HandGal4	4	80618	1	f	control	1.77899	1.76681	0.0552902	0.0312938				0.562638	0.566008	0.0175861	0.0310704				0.382878	0.38245	0.016174	0.0422904	0.680505	20.2925				0.179246	0.175951	0.00602415	0.0342377	0.318582	9.50006			0.0310704	0.468155	88.3143	87.4663	87.8903	64.7643	56.9735	60.8689	0.307445
UASGFPVal10RnaiHandGal4_05_1wf_C11440_30s_080618	0.633	UASGFPVal10HandGal4	5	80618	1	f	control	1.52704	1.52017	0.0838379	0.0551504				0.656789	0.657823	0.035293	0.0536512				0.49123	0.497183	0.0354965	0.0713953	0.747927	22.1054				0.165451	0.168268	0.0049099	0.029179	0.251909	7.61076			0.0536512	0.33681	98.7805	84.6541	91.7173	65.199	54.0428	59.6209	0.349949
UASGFPVal10RnaiHandGal4_06_1wf_C11440_30s_080618	0.633	UASGFPVal10HandGal4	6	80618	1	f	control	2.0068	2.01136	0.0372584	0.018524				0.498477	0.497177	0.00934217	0.0187904				0.307125	0.305956	0.00884886	0.028922	0.616126	18.1204				0.19135	0.191224	0.00296283	0.015494	0.38387	11.481			0.0187904	0.623038	80.513	80.401	80.457	46.248	60.165	53.2065	0.338697
UASGFPVal10RnaiHandGal4_07_1wf_C11440_30s_080618	0.633	UASGFPVal10HandGal4	7	80618	1	f	control	1.18143	1.17784	0.0739324	0.0627697				0.849707	0.849031	0.0525849	0.0619351				0.683902	0.680755	0.0510385	0.0749734	0.804868	23.2527				0.165439	0.168262	0.00645846	0.0383833	0.194701	5.79036			0.0619351	0.241904	102.876	94.9521	98.9139	71.8085	67.1726	69.4906	0.297464
UASGFPVal10RnaiHandGal4_08_1wf_C11440_30s_080618	0.633	UASGFPVal10HandGal4	8	80618	1	f	control	2.54955	2.51399	0.530737	0.211113				0.407175	0.397774	0.0768739	0.19326				0.269495	0.275377	0.0622841	0.226178	0.661865	19.6731				0.13768	0.1224	0.0472309	0.385872	0.338135	10.0506			0.19326	0.510882	96.8821	83.0775	89.9798	74.7905	55.7938	65.2922	0.274368
UASGFPVal10RnaiHandGal4_09_1wf_C11440_30s_080618	0.633	UASGFPVal10HandGal4	9	80618	1	f	control	1.42529	1.42107	0.0430277	0.0302785				0.702209	0.703697	0.0200605	0.0285073				0.518305	0.520114	0.0202368	0.0389084	0.738106	21.7688				0.183393	0.183574	0.00353931	0.01928	0.261166	7.70253			0.0285073	0.353833	98.4595	80.3212	89.3903	67.3959	57.2541	62.325	0.302777
UASGFPVal10RnaiHandGal4_10_1wf_C11440_30s_080618	0.633	UASGFPVal10HandGal4	10	80618	1	f	control	1.10594	1.06292	0.13026	0.122549				0.914911	0.940802	0.100208	0.106513				0.744907	0.764886	0.0949471	0.124132	0.814186	23.0921				0.16995	0.168297	0.00676025	0.0401686	0.185756	5.4384			0.106513	0.228149	93.1048	91.9616	92.5332	68.4372	56.9841	62.7106	0.32229
UASGFPVal10RnaiHandGal4_11_1wf_C11440_30s_080618	0.633	UASGFPVal10HandGal4	11	80618	1	f	control	2.98796	2.97132	0.0937159	0.0315401				0.334989	0.336554	0.0102482	0.0304505				0.181751	0.183573	0.008968	0.0488526	0.542559	15.9941				0.153235	0.152979	0.00663665	0.0433828	0.457433	13.6379			0.0304505	0.843103	98.7663	95.9658	97.366	71.5542	62.1308	66.8425	0.313493
UASGFPVal10RnaiHandGal4_12_1wf_C11440_30s_080618	0.633	UASGFPVal10HandGal4	12	80618	1	f	control	1.05914	1.05432	0.0581508	0.0551549				0.946987	0.948481	0.0516255	0.0544296				0.773527	0.772541	0.0508892	0.0658724	0.81683	23.9793				0.173537	0.168301	0.00915492	0.0543963	0.183251	5.55317			0.0544296	0.224345	86.7787		86.7787	59.6231		59.6231	0.31293
UASGFPVal10RnaiHandGal4_13_1wf_C11440_30s_080618	0.633	UASGFPVal10HandGal4	13	80618	1	f	control	1.38014	1.36187	0.0772856	0.0567497				0.726649	0.734296	0.0391094	0.0532611				0.546517	0.550739	0.0384331	0.0697846	0.752107	21.8607				0.180215	0.183543	0.00558229	0.030414	0.248009	7.38882			0.0532611	0.329752	86.2368	79.4081	82.8224	51.3706	47.9829	49.6767	0.400202
UASGFPVal10RnaiHandGal4_14_1wf_C11440_30s_080618	0.633	UASGFPVal10HandGal4	14	80618	1	f	control	1.27854	1.26929	0.15969	0.12581				0.794249	0.78784	0.0980426	0.124445				0.623699	0.619564	0.0967333	0.156131	0.785269	23.0769				0.170691	0.168276	0.00944915	0.0561528	0.214909	6.48626			0.124445	0.273675	87.9961	72.0175	80.0068	63.9831	45.1875	54.5853	0.317742
UASGFPVal10RnaiHandGal4_15_1wf_C11440_30s_080618	0.633	UASGFPVal10HandGal4	15	80618	1	f	control	1.30317	1.28173	0.0863376	0.06736				0.770329	0.780223	0.0474658	0.0608362				0.606882	0.619578	0.0452713	0.073068	0.787822	23.0615				0.163447	0.160629	0.0108183	0.0673494	0.212178	6.21099			0.0608362	0.269323	93.6926	97.1464	95.4195	69.6559	72.3865	71.0212	0.255695
UASGFPVal10RnaiHandGal4_01_1wf_C11440_30s_080618	0.633	UASGFPVal10HandGal4	1	80618	1	f	control	1.85825	1.86773	0.105146	0.0562958				0.539876	0.535408	0.0311844	0.0582443				0.382586	0.38244	0.0347766	0.0909336	0.708655	21.0422				0.15729	0.160616	0.0129611	0.080696	0.291345	8.65097			0.0582443	0.411125	104.462	80.4807	92.4715	79.7982	55.1619	67.48	0.270261
UASGFPVal10RnaiHandGal4_02_1wf_C11440_30s_080618	0.633	UASGFPVal10HandGal4	2	80618	1	f	control	1.65566	1.65494	0.0638255	0.0385668				0.604891	0.604253	0.0233875	0.0387049				0.444265	0.436014	0.0234545	0.0537929	0.734456	21.769				0.160779	0.160628	0.00582791	0.0362819	0.265798	8.03893			0.0387049	0.361898	88.2621	89.1272	88.6946	66.1356	67.3959	66.7658	0.24724
UASGFPVal10RnaiHandGal4_03_1wf_C11440_30s_080618	0.633	UASGFPVal10HandGal4	3	80618	1	f	control	2.12669	2.04286	0.248232	0.121512				0.475098	0.489517	0.0470362	0.0960869				0.299789	0.313578	0.0464964	0.148277	0.631005	18.5869				0.175075	0.175927	0.00740281	0.0420789	0.368503	11.0297			0.0960869	0.583995	98.117	81.5219	89.8195	75.9705	61.1263	68.5484	0.23682
UASGFPVal10RnaiHandGal4_04_1wf_C11440_30s_080618	0.633	UASGFPVal10HandGal4	4	80618	1	f	control	1.77899	1.76681	0.0552902	0.0312938				0.562638	0.566008	0.0175861	0.0310704				0.382878	0.38245	0.016174	0.0422904	0.680505	20.2925				0.179246	0.175951	0.00602415	0.0342377	0.318582	9.50006			0.0310704	0.468155	88.3143	87.4663	87.8903	64.7643	56.9735	60.8689	0.307445
UASGFPVal10RnaiHandGal4_05_1wf_C11440_30s_080618	0.633	UASGFPVal10HandGal4	5	80618	1	f	control	1.52704	1.52017	0.0838379	0.0551504				0.656789	0.657823	0.035293	0.0536512				0.49123	0.497183	0.0354965	0.0713953	0.747927	22.1054				0.165451	0.168268	0.0049099	0.029179	0.251909	7.61076			0.0536512	0.33681	98.7805	84.6541	91.7173	65.199	54.0428	59.6209	0.349949
UASGFPVal10RnaiHandGal4_06_1wf_C11440_30s_080618	0.633	UASGFPVal10HandGal4	6	80618	1	f	control	2.0068	2.01136	0.0372584	0.018524				0.498477	0.497177	0.00934217	0.0187904				0.307125	0.305956	0.00884886	0.028922	0.616126	18.1204				0.19135	0.191224	0.00296283	0.015494	0.38387	11.481			0.0187904	0.623038	80.513	80.401	80.457	46.248	60.165	53.2065	0.338697
UASGFPVal10RnaiHandGal4_07_1wf_C11440_30s_080618	0.633	UASGFPVal10HandGal4	7	80618	1	f	control	1.18143	1.17784	0.0739324	0.0627697				0.849707	0.849031	0.0525849	0.0619351				0.683902	0.680755	0.0510385	0.0749734	0.804868	23.2527				0.165439	0.168262	0.00645846	0.0383833	0.194701	5.79036			0.0619351	0.241904	102.876	94.9521	98.9139	71.8085	67.1726	69.4906	0.297464
UASGFPVal10RnaiHandGal4_08_1wf_C11440_30s_080618	0.633	UASGFPVal10HandGal4	8	80618	1	f	control	2.54955	2.51399	0.530737	0.211113				0.407175	0.397774	0.0768739	0.19326				0.269495	0.275377	0.0622841	0.226178	0.661865	19.6731				0.13768	0.1224	0.0472309	0.385872	0.338135	10.0506			0.19326	0.510882	96.8821	83.0775	89.9798	74.7905	55.7938	65.2922	0.274368
UASGFPVal10RnaiHandGal4_09_1wf_C11440_30s_080618	0.633	UASGFPVal10HandGal4	9	80618	1	f	control	1.42529	1.42107	0.0430277	0.0302785				0.702209	0.703697	0.0200605	0.0285073				0.518305	0.520114	0.0202368	0.0389084	0.738106	21.7688				0.183393	0.183574	0.00353931	0.01928	0.261166	7.70253			0.0285073	0.353833	98.4595	80.3212	89.3903	67.3959	57.2541	62.325	0.302777
UASGFPVal10RnaiHandGal4_10_1wf_C11440_30s_080618	0.633	UASGFPVal10HandGal4	10	80618	1	f	control	1.10594	1.06292	0.13026	0.122549				0.914911	0.940802	0.100208	0.106513				0.744907	0.764886	0.0949471	0.124132	0.814186	23.0921				0.16995	0.168297	0.00676025	0.0401686	0.185756	5.4384			0.106513	0.228149	93.1048	91.9616	92.5332	68.4372	56.9841	62.7106	0.32229
UASGFPVal10RnaiHandGal4_11_1wf_C11440_30s_080618	0.633	UASGFPVal10HandGal4	11	80618	1	f	control	2.98796	2.97132	0.0937159	0.0315401				0.334989	0.336554	0.0102482	0.0304505				0.181751	0.183573	0.008968	0.0488526	0.542559	15.9941				0.153235	0.152979	0.00663665	0.0433828	0.457433	13.6379			0.0304505	0.843103	98.7663	95.9658	97.366	71.5542	62.1308	66.8425	0.313493
UASGFPVal10RnaiHandGal4_12_1wf_C11440_30s_080618	0.633	UASGFPVal10HandGal4	12	80618	1	f	control	1.05914	1.05432	0.0581508	0.0551549				0.946987	0.948481	0.0516255	0.0544296				0.773527	0.772541	0.0508892	0.0658724	0.81683	23.9793				0.173537	0.168301	0.00915492	0.0543963	0.183251	5.55317			0.0544296	0.224345	86.7787		86.7787	59.6231		59.6231	0.31293
UASGFPVal10RnaiHandGal4_13_1wf_C11440_30s_080618	0.633	UASGFPVal10HandGal4	13	80618	1	f	control	1.38014	1.36187	0.0772856	0.0567497				0.726649	0.734296	0.0391094	0.0532611				0.546517	0.550739	0.0384331	0.0697846	0.752107	21.8607				0.180215	0.183543	0.00558229	0.030414	0.248009	7.38882			0.0532611	0.329752	86.2368	79.4081	82.8224	51.3706	47.9829	49.6767	0.400202
UASGFPVal10RnaiHandGal4_14_1wf_C11440_30s_080618	0.633	UASGFPVal10HandGal4	14	80618	1	f	control	1.27854	1.26929	0.15969	0.12581				0.794249	0.78784	0.0980426	0.124445				0.623699	0.619564	0.0967333	0.156131	0.785269	23.0769				0.170691	0.168276	0.00944915	0.0561528	0.214909	6.48626			0.124445	0.273675	87.9961	72.0175	80.0068	63.9831	45.1875	54.5853	0.317742
UASGFPVal10RnaiHandGal4_15_1wf_C11440_30s_080618	0.633	UASGFPVal10HandGal4	15	80618	1	f	control	1.30317	1.28173	0.0863376	0.06736				0.770329	0.780223	0.0474658	0.0608362				0.606882	0.619578	0.0452713	0.073068	0.787822	23.0615				0.163447	0.160629	0.0108183	0.0673494	0.212178	6.21099			0.0608362	0.269323	93.6926	97.1464	95.4195	69.6559	72.3865	71.0212	0.255695
[truncated: 36 more columns]

## Sheet: data_random_KK
File.Name	Scale.Factor	GenoType	ID	Comments	Age	Sex	Type	Heart.Rate.Mean	Heart.Rate.Median	Heart.Rate.Stddev	Heart.Rate.SDonMean				Heart.Period.Mean	Heart.Period.Median	Heart.Period.Stddev	Heart.Period.SDonMean				Diastolic.Interval.Mean	Diastolic.Interval.Median	Diastolic.Interval.Stddev	Diastolic.Interval.SDonMean	DIonHPmean	Diastolic.Interval.TotalTime				Systolic.Interval.Mean	Systolic.Interval.Median	Systolic.Interval.Stddev	Systolic.Interval.SDonMean	SIonHPmean	Systolic.Interval.TotalTime	SIAI		Arrhythmia.Index	SIMean.on.DIMean	1st.Diastolic.Diameter.Vertical	2nd.Diastolic.Diameter.Vertical	Avg.Diastolic.Diameter	1st.Systolic.Diameter.Vertical	2nd.Systolic.Diameter.Vertical	Avg.Systolic.Diameter	Fractional.Shortening	1st Diastolic Horizontal	Diastolic Surface Area (mm^2)
HandGal4xCG12688_01_1wf_93001_30s_041217,1	1.1627	CG12688xHandGal4	1	41217.1	1	f	random	1.2355	1.12969	0.458562	0.405918				0.891032	0.8852	0.250161	0.282604				0.650953	0.653	0.239441	0.366678	0.730561	20.8305				0.241253	0.2467	0.0147434	0.0597624	0.270757	7.7201			0.282604	0.370615	95.6882	93.3714	94.5298	66.7718	55.2497	61.0107	0.354587
HandGal4xCG12688_10_1wf_93001_30s_041217,10	1.1627	CG12688xHandGal4	10	41217.1	1	f	random	1.18524	1.178	0.0722183	0.0613061				0.846921	0.8489	0.0531911	0.0626588				0.677839	0.6821	0.0534111	0.0783038	0.800357	22.3687				0.169232	0.166901	0.00412112	0.024692	0.199821	5.7539			0.0626588	0.249664	89.5279	73.2132	81.3705	51.172	45.6869	48.4294	0.404828
HandGal4xCG12688_11_1wf_93001_30s_041217,11	1.1627	CG12688xHandGal4	11	41217.1	1	f	random	1.64343	1.64069	0.0482742	0.0294232				0.609002	0.6095	0.0177348	0.0290973				0.435649	0.4425	0.0193431	0.0437133	0.715349	20.4755				0.173371	0.1741	0.00405138	0.0232704	0.28468	8.3218			0.0290973	0.39796	106.722	100.019	103.37	69.3734	65.1112	67.2423	0.349502
HandGal4xCG12688_12_1wf_93001_30s_041217,12	1.1627	CG12688xHandGal4	12	41217.1	1	f	random	3.59902	2.50627	1.91272	0.763176				0.332913	0.399	0.143483	0.359608				0.206022	0.2612	0.143781	0.550462	0.618847	17.7179				0.126849	0.1306	0.00999401	0.0765238	0.381029	11.0359			0.359608	0.615707
HandGal4xCG12688_13_1wf_93001_30s_041217,13	1.1627	CG12688xHandGal4	13	41217.1	1	f	random	1.09664	1.11148	0.0698856	0.0628761				0.915606	0.8997	0.0621959	0.0691296				0.745449	0.732901	0.0608514	0.0830282	0.814158	23.1089				0.170509	0.166901	0.00543307	0.0325527	0.186225	5.4563			0.0691296	0.228734	102.377	91.8533	97.1152	62.8288	57.079	59.9539	0.382651
HandGal4xCG12688_14_1wf_93001_30s_041217,14	1.1627	CG12688xHandGal4	14	41217.1	1	f	random	1.36229	1.56617	0.497548	0.317685				1.2489	0.6385	1.93049	3.02348				1.07633	0.4643	1.92666	4.14959	0.861819	24.7555				0.172574	0.1669	0.0133656	0.0800816	0.138181	3.9692			3.02348	0.160336	80.26	86.0712	83.1656	60.4716	52.3215	56.3965	0.321877
HandGal4xCG12688_15_1wf_93001_30s_041217,15	1.1627	CG12688xHandGal4	15	41217.2	1	f	random	1.67894	1.68067	0.114995	0.0684219				0.598279	0.6022	0.0393253	0.0653027				0.425806	0.427999	0.0378521	0.0884395	0.711718	20.4387				0.172508	0.174101	0.00450709	0.0258878	0.288341	8.4529			0.0653027	0.405133	91.9195	85.0044	88.462	58.702	51.2776	54.9898	0.37838
HandGal4xCG12688_16_1wf_93001_30s_041217,16	1.1627	CG12688xHandGal4	16	41217.2	1	f	random	1.33561	1.33815	0.0472582	0.0353161				0.749616	0.7474	0.0254016	0.0339866				0.574337	0.5732	0.0242934	0.0423821	0.766175	21.8248				0.175249	0.174101	0.00285709	0.0164105	0.233785	6.8347			0.0339866	0.305132
HandGal4xCG12688_17_1wf_93001_30s_041217,17	1.1627	CG12688xHandGal4	17	41217.2	1	f	random	1.39854	1.49813	0.357898	0.238897				0.964507	0.6748	1.339	1.9843				0.80416	0.515201	1.33621	2.59357	0.833753	24.1248				0.160347	0.1596	0.00398023	0.0249388	0.166247	4.8104			1.9843	0.199396	83.8435	78.7638	81.3036	57.079	54.287	55.683	0.315123
HandGal4xCG12688_18_1wf_93001_30s_041217,18	1.1627	CG12688xHandGal4	18	41217.2	1	f	random	1.65566	1.37836	0.773661	0.561291				0.864291	0.7255	0.794754	1.09546				0.696306	0.5587	0.790426	1.41476	0.805638	22.9781				0.167741	0.1669	0.00931367	0.0558039	0.19408	5.7032			1.09546	0.240901	101.821	113.945	107.883	68.2437	79.0978	73.6707	0.317122
HandGal4xCG12688_19_1wf_93001_30s_041217,19	1.1627	CG12688xHandGal4	19	41217.2	1	f	random	1.54107	1.53139	0.0633404	0.0413613				0.649963	0.653	0.0264141	0.0404504				0.472436	0.471601	0.0254444	0.0539531	0.726867	20.7872				0.176607	0.1742	0.00419656	0.0240904	0.271718	7.7707			0.0404504	0.373822	87.3961	89.5581	88.4771	58.425	67.4466	62.9358	0.288677
HandGal4xCG12688_02_1wf_93001_30s_041217,2	1.1627	CG12688xHandGal4	2	41217.2	1	f	random	1.499	1.4979	0.0835275	0.0557629				0.669067	0.6748	0.0356296	0.0528002				0.434151	0.4353	0.0318941	0.0732693	0.648891	18.6685				0.234709	0.2322	0.0107679	0.0463733	0.350801	10.0925			0.0528002	0.540617	109.596	95.3698	102.483	67.9757	50.4805	59.2281	0.42207
HandGal4xCG12688_20_1wf_93001_30s_041217,20	1.1627	CG12688xHandGal4	20	41217.2	1	f	random	1.38007	1.37836	0.0447846	0.0324912				0.725369	0.7255	0.0237199	0.0326945				0.560349	0.5587	0.025222	0.0451441	0.772501	21.8536				0.164887	0.1669	0.00381875	0.0228805	0.227315	6.5955			0.0326945	0.294259	93.9559	92.1178	93.0369	63.6094	56.7822	60.1958	0.35299
HandGal4xCG12688_03_1wf_93001_30s_041217,3	1.1627	CG12688xHandGal4	3	41217.3	1	f	random	1.44348	1.43575	0.0358453	0.0249662				0.693173	0.6965	0.0169969	0.0244033				0.504086	0.507898	0.0179133	0.0352695	0.727214	21.1716				0.188117	0.188601	0.00195791	0.0103813	0.271386	7.71281			0.0244033	0.373185	81.4969		81.4969	53.1292		53.1292	0.348084
HandGal4xCG12688_04_1wf_93001_30s_041217,4	1.1627	CG12688xHandGal4	4	41217.4	1	f	random	1.78915	1.78987	0.0323342	0.0180651				0.559106	0.5587	0.0101063	0.0180889				0.380855	0.3773	0.0103176	0.0273459	0.681186	19.4236				0.178171	0.1813	0.00517275	0.0285314	0.318672	9.2649			0.0180889	0.467819	88.5562	105.908	97.232	58.1815	64.0436	61.1125	0.371478
HandGal4xCG12688_05_1wf_93001_30s_041217,5	1.1627	CG12688xHandGal4	5	41217.5	1	f	random	1.94047	1.86254	0.400542	0.215051				0.527774	0.536901	0.0653548	0.121726				0.36493	0.377299	0.0656268	0.173938	0.69145	19.7062				0.162786	0.1597	0.00549463	0.0344059	0.308438	8.9532			0.121726	0.446074	104.701	94.2433	99.4722	67.4366	53.4968	60.4667	0.392124
HandGal4xCG12688_06_1wf_93001_30s_041217,6	1.1627	CG12688xHandGal4	6	41217.6	1	f	random	1.18424	1.16809	0.092622	0.0792937				0.848903	0.8561	0.0594079	0.0693936				0.658482	0.6603	0.0600065	0.0908775	0.775686	21.7299				0.190368	0.1887	0.00428295	0.0226972	0.224251	6.4725			0.0693936	0.289101	89.7993	89.7165	89.7579	51.9975	57.0079	54.5027	0.392781
HandGal4xCG12688_07_1wf_93001_30s_041217,7	1.1627	CG12688xHandGal4	7	41217.7	1	f	random	1.06847	1.08519	0.181806	0.167534				0.964241	0.9215	0.176049	0.191046				0.786607	0.754601	0.17936	0.237688	0.815778	22.8116				0.178	0.1742	0.0168417	0.0966803	0.184601	5.34			0.191046	0.226288	86.236	86.0477	86.1418	60.8615	53.5347	57.1981	0.336
HandGal4xCG12688_08_1wf_93001_30s_041217,8	1.1627	CG12688xHandGal4	8	41217.8	1	f	random	1.38881	1.39218	0.0691653	0.0496815				0.721836	0.7183	0.0362866	0.0505173				0.549179	0.5514	0.0355802	0.064527	0.760809	21.418				0.172513	0.174101	0.00342137	0.0196517	0.238991	6.90051			0.0505173	0.314128	99.3819	94.4367	96.9093	59.582	60.4604	60.0212	0.380646
HandGal4xCG12688_09_1wf_93001_30s_041217,9	1.1627	CG12688xHandGal4	9	41217.9	1	f	random	1.13436	0.963762	0.681309	0.706927				1.18417	1.0448	0.901637	0.862976				1.0073	0.8634	0.900011	1.0424	0.850644	24.1753				0.176464	0.1742	0.0110299	0.0633177	0.149019	4.4116			0.862976	0.175184	107.126	108.156	107.641	70.9247	60.5609	65.7428	0.389241
HandGal4xCG12688_01_1wf_93001_30s_042117,1	1.1627	CG12688xHandGal4	1	42117.1	1	f	random	1.35801	1.36314	0.0605544	0.0444227				0.737824	0.7337	0.0330252	0.0450119				0.495071	0.4939	0.0308156	0.0623924	0.670988	18.8127				0.24249	0.2397	0.0053219	0.0222023	0.328655	9.4571			0.0450119	0.489808	94.6369	80.4955	87.5662	59.3091	43.0199	51.1645	0.415705
HandGal4xCG12688_02_1wf_93001_30s_042117,2	1.1627	CG12688xHandGal4	2	42117.2	1	f	random	1.18024	1.17661	0.0773729	0.0657592				0.850936	0.8499	0.0558798	0.0657486				0.632155	0.632	0.0564474	0.0893155	0.742893	20.8611				0.218756	0.2179	0.00304581	0.013978	0.257077	7.4377			0.0657486	0.346048	107.177	94.358	100.767	70.2736	47.0283	58.651	0.417956
HandGal4xCG12688_03_1wf_93001_30s_042117,3	1.1627	CG12688xHandGal4	3	42117.3	1	f	random	1.5325	1.56446	0.156948	0.100321				0.659802	0.6392	0.07625	0.11929				0.461493	0.4431	0.0670651	0.151354	0.699441	19.8442				0.197927	0.1961	0.0159851	0.0815148	0.29998	8.7088			0.11929	0.428885	104.959	83.2367	94.0978	62.9578	44.014	53.4859	0.431593
HandGal4xCG12688_04_1wf_93001_30s_042117,4	1.1627	CG12688xHandGal4	4	42117.4	1	f	random	2.53149	2.54972	0.0637096	0.0249869				0.39526	0.3922	0.0102123	0.0260384				0.212241	0.2106	0.00992601	0.0471321	0.536966	15.4936				0.183375	0.181601	0.00433137	0.0238511	0.463936	13.3864			0.0260384	0.863996	99.2663	99.999	99.6326	57.0197	60.5051	58.7624	0.410209
HandGal4xCG12688_05_1wf_93001_30s_042117,5	1.1627	CG12688xHandGal4	5	42117.5	1	f	random	2.23348	2.25683	0.119699	0.0530388				0.448978	0.4431	0.0245982	0.055514				0.226645	0.225201	0.0242067	0.10749	0.504802	14.5053				0.222333	0.217901	0.0107876	0.0495069	0.495198	14.2293			0.055514	0.980974	110.512	101.182	105.847	66.6401	59.2977	62.9689	0.405093
HandGal4xCG12688_06_1wf_93001_30s_042117,6	1.1627	CG12688xHandGal4	6	42117.6	1	f	random	2.24582	2.25734	0.11905	0.0527393				0.446597	0.4431	0.0254392	0.0574118				0.262378	0.2542	0.0250538	0.0985596	0.587506	17.0546				0.184274	0.181601	0.00459252	0.0252891	0.412618	11.9778			0.0574118	0.702321	95.3414	79.4814	87.4114	57.7266	47.0283	52.3775	0.400794
HandGal4xCG12688_07_1wf_93001_30s_042117,7	1.1627	CG12688xHandGal4	7	42117.7	1	f	random	2.12199	2.151	0.215017	0.0999615				0.47649	0.4649	0.0539068	0.115954				0.28352	0.268801	0.0512109	0.190516	0.595017	17.2947				0.194418	0.1961	0.00608184	0.031014	0.408022	11.6651			0.115954	0.685731	95.6882	91.8827	93.7854	51.3303	56.003	53.6667	0.427772
HandGal4xCG12688_08_1wf_93001_30s_042117,8	1.1627	CG12688xHandGal4	8	42117.8	1	f	random	2.32045	2.33373	0.0886459	0.0379847				0.431587	0.428499	0.0171299	0.0399764				0.238072	0.232401	0.016985	0.0730851	0.55162	15.9508				0.193515	0.196098	0.00600128	0.0306034	0.44838	12.9655			0.0399764	0.812843	76.9581	74.2855	75.6218	50.1176	49.3429	49.7303	0.342382
HandGal4xCG12688_09_1wf_93001_30s_042117,9	1.1627	CG12688xHandGal4	9	42117.9	1	f	random	2.60491	2.59808	0.0443814	0.0170824				0.384	0.3849	0.00658784	0.0171157				0.196595	0.1961	0.00610666	0.0311405	0.511965	14.7446				0.187424	0.188801	0.00320585	0.0169801	0.488082	14.2442			0.0171157	0.953351	93.0451	88.4875	90.7663	52.3215	51.172	51.7468	0.42989
HandGal4xKKControl_01_1wf_93003_30s_1107171	0.74	KKControlxHandGal4	1	1107171	1	f	control	2.29786	2.21631	0.397481	0.179343				0.446413	0.451302	0.0676	0.149789				0.227483	0.2317	0.0610967	0.263689	0.50958	15.2414				0.219296	0.2195	0.0205276	0.0935202	0.491239	14.9121			0.149789	0.964007	96.2114	84.8971	90.5542	68.084	55.5	61.792	0.317624
HandGal4xKKControl_01_1wf_93003_30s_1110171	0.74	KKControlxHandGal4	1	1110171	1	f	control	2.36486	2.37473	0.0444199	0.0187053				0.423	0.421101	0.00799868	0.0189947				0.237417	0.2386	0.00863829	0.0362041	0.56127	16.6192				0.185539	0.182501	0.00593409	0.0325154	0.438628	13.1733			0.0189947	0.781491	92.1887	63.6443	77.9165	53.7914	39.2479	46.5197	0.402955
HandGal4xKKControl_01_1wf_93003_30s_1113171	0.74	KKControlxHandGal4	1	1113171	1	f	control	1.32549	1.33156	0.0339951	0.0255304				0.75491	0.751001	0.0192642	0.0256514				0.573702	0.5755	0.0186777	0.0324547	0.759961	22.3744				0.181208	0.182499	0.00373193	0.020449	0.240039	7.0671			0.0256514	0.315857	99.9986	90.3285	95.1636	53.2851	49.9322	51.6087	0.457685
HandGal4xKKControl_02_1wf_93003_30s_1107172	0.74	KKControlxHandGal4	2	1107172	1	f	control	2.54463	2.48571	0.437381	0.175958				0.409726	0.4022	0.109338	0.271849				0.193086	0.2071	0.0423988	0.204726	0.471257	14.0953				0.216181	0.1951	0.0969668	0.497011	0.527624	15.9974			0.271849	1.11961	97.0416	90.2254	93.6335	57.7627	52.9604	55.3616	0.408742
HandGal4xKKControl_02_1wf_93003_30s_1110172	0.74	KKControlxHandGal4	2	1110172	1	f	control	1.62264	1.61917	0.0360449	0.0222613				0.616581	0.6176	0.0136265	0.0220636				0.404477	0.400101	0.0146169	0.0365331	0.656	19.8194				0.211719	0.2106	0.00318204	0.0151094	0.343376	10.1625			0.0220636	0.523438	107.555	93.2664	100.411	68.405	46.1715	57.2882	0.429461
HandGal4xKKControl_02_1wf_93003_30s_1113172	0.74	KKControlxHandGal4	2	1113172	1	f	control	1.63039	1.49992	0.525832	0.350573				0.652076	0.6668	0.137066	0.205558				0.430568	0.463202	0.123305	0.266202	0.660303	19.8061				0.218011	0.203499	0.120179	0.590565	0.334333	10.0285			0.205558	0.506333	97.8592	76.9636	87.4114	60.1042	48.1512	54.1277	0.380771
HandGal4xKKControl_03_1wf_93003_30s_1107173	0.74	KKControlxHandGal4	3	1107173	1	f	control	1.67509	1.67336	0.0478087	0.0285705				0.597464	0.6095	0.0207521	0.0340477				0.44062	0.4509	0.0191635	0.0425005	0.737483	22.031				0.156639	0.158501	0.00479947	0.0302804	0.262174	7.98861			0.0340477	0.355498	89.7355	92.4289	91.0822	65.225	58.3991	61.8121	0.32136
HandGal4xKKControl_03_1wf_93003_30s_1110173	0.74	KKControlxHandGal4	3	1110173	1	f	control	2.66698	2.68817	0.0523505	0.0194744				0.375076	0.372	0.00743729	0.0199927				0.184489	0.1825	0.00650922	0.0356669	0.49187	14.7591				0.190651	0.1895	0.0030531	0.0161113	0.508299	15.0614			0.0199927	1.0334	98.4311	80.9987	89.7149	58.4787	49.203	53.8409	0.399867
HandGal4xKKControl_03_1wf_93003_30s_1113173	0.74	KKControlxHandGal4	3	1113173	1	f	control	2.129	2.12675	0.0986821	0.0464004				0.470668	0.470201	0.0212343	0.0451601				0.304349	0.3018	0.0170777	0.0565862	0.646632	19.174				0.166242	0.1684	0.0134211	0.0796975	0.353205	10.6395			0.0451601	0.546222	102.144	93.1636	97.6539	84.373	72.5238	78.4484	0.196669
HandGal4xKKControl_04_1wf_93003_30s_1107174	0.74	KKControlxHandGal4	4	1107174	1	f	control	2.6868	2.6455	0.293559	0.110965				0.376292	0.377901	0.0397566	0.105204				0.236995	0.243698	0.042738	0.175373	0.629816	18.9596				0.13901	0.1461	0.0122103	0.0835747	0.36942	11.1208			0.105204	0.586552	83.012	77.2512	80.1316	56.5362		56.5362	0.294458
HandGal4xKKControl_04_1wf_93003_30s_1110174	0.74	KKControlxHandGal4	4	1110174	1	f	control	1.96433	1.71644	0.530557	0.309103				0.534409	0.582601	0.118297	0.20305				0.350273	0.407101	0.129878	0.319032	0.655439	19.265				0.184357	0.1755	0.0170421	0.097106	0.344974	10.324			0.20305	0.526325	106.624	88.06	97.3421	60.0541	49.6021	54.8281	0.436749
HandGal4xKKControl_04_1wf_93003_30s_1113174	0.74	KKControlxHandGal4	4	1113174	1	f	control	3.04977	3.03123	0.128663	0.0424458				0.328454	0.3299	0.0135255	0.0409988				0.166115	0.1684	0.0130338	0.0773978	0.505748	15.1165				0.162277	0.1614	0.00286405	0.017745	0.494062	14.7672			0.0409988	0.976893	94.1226	72.7048	83.4137	59.274	42.2384	50.7562	0.391513
HandGal4xKKControl_05_1wf_93003_30s_1107175	0.74	KKControlxHandGal4	5	1107175	1	f	control	1.19572	1.09361	0.267384	0.244496				0.862488	0.9144	0.137176	0.150017				0.662712	0.7073	0.134479	0.19013	0.768372	22.5322				0.19964	0.1952	0.00739429	0.0378806	0.23147	6.9874			0.150017	0.301247	99.2042	88.6673	93.9357	68.08	55.6232	61.8516	0.341554
HandGal4xKKControl_05_1wf_93003_30s_1110175	0.74	KKControlxHandGal4	5	1110175	1	f	control	2.46593	2.45641	0.0538729	0.0219316				0.405714	0.407	0.00875772	0.0215177				0.236122	0.2386	0.00929088	0.0389392	0.581991	17.2369				0.16967	0.168499	0.00353745	0.0209939	0.418202	12.5556			0.0215177	0.718571	116.239	105.823	111.031	73.2936	51.0814	62.1875	0.439907
HandGal4xKKControl_05_1wf_93003_30s_1113175	0.74	KKControlxHandGal4	5	1113175	1	f	control	3.47117	3.47464	0.0540019	0.0155417				0.288157	0.2878	0.00447511	0.0155494				0.115868	0.119299	0.00510058	0.0427546	0.402101	12.0503				0.172285	0.1754	0.00506835	0.028896	0.597884	17.9176			0.0155494	1.4869	98.4895	92.7955	95.6425	59.4262	57.1527	58.2895	0.390549
HandGal4xKKControl_06_1wf_93003_30s_1107176	0.74	KKControlxHandGal4	6	1107176	1	f	control	2.25733	2.10261	0.740057	0.351971				0.48533	0.4754	0.137931	0.290136				0.32021	0.2928	0.139527	0.476526	0.659778	19.5328				0.164815	0.158701	0.0182476	0.114981	0.339593	10.2185			0.290136	0.514708	89.65	81.5647	85.6073	63.1129	61.5803	62.3466	0.271714
HandGal4xKKControl_06_1wf_93003_30s_1110176	0.74	KKControlxHandGal4	6	1110176	1	f	control	2.18609	2.15889	0.191562	0.0887314				0.460289	0.4632	0.0335899	0.072517				0.288402	0.294701	0.0322598	0.109466	0.626566	18.7461				0.171888	0.1754	0.00761475	0.0434137	0.373434	11.1727			0.072517	0.596001	105.843	78.1252	91.9843	67.34	41.4664	54.4032	0.40856
HandGal4xKKControl_06_1wf_93003_30s_1113176	0.74	KKControlxHandGal4	6	1113176	1	f	control	2.51456	2.7933	0.593342	0.212416				0.42159	0.358	0.131401	0.367041				0.219841	0.1544	0.135545	0.87788	0.521456	15.6087				0.201749	0.196501	0.00968255	0.0492749	0.478544	14.3242			0.367041	0.917706	77.8654	62.3184	70.0919	48.7839	31.8544	40.3192	0.424767
HandGal4xKKControl_07_1wf_93003_30s_1107177	0.74	KKControlxHandGal4	7	1107177	1	f	control	1.55672	1.54775	0.0690777	0.0446311				0.643585	0.6461	0.027731	0.0429206				0.455661	0.4512	0.0295017	0.0653848	0.708005	20.9604				0.188079	0.183001	0.00786443	0.0429749	0.292236	8.83969			0.0429206	0.41276	95.8721		95.8721	66.1255		66.1255	0.310274
HandGal4xKKControl_07_1wf_93003_30s_1110177	0.74	KKControlxHandGal4	7	1110177	1	f	control	3.10179	2.90782	0.433107	0.148946				0.327004	0.343901	0.0407575	0.118515				0.180316	0.1965	0.041274	0.210046	0.551419	16.4088				0.146696	0.1474	0.00490828	0.0332991	0.448604	13.496			0.118515	0.813545	107.425	92.5118	99.9684	71.9667	56.24	64.1033	0.358764
HandGal4xKKControl_07_1wf_93003_30s_1113177	0.74	KKControlxHandGal4	7	1113177	1	f	control	3.61581	3.65363	0.0697333	0.0190861				0.276635	0.273701	0.00536786	0.0196121				0.115669	0.112301	0.00564211	0.0502411	0.41813	12.4923				0.160966	0.1614	0.002429	0.0150496	0.58187	17.3843			0.0196121	1.3916	89.3196	57.1527	73.2361	54.5245	34.2405	44.3825	0.393981
HandGal4xKKControl_08_1wf_93003_30s_1107178	0.74	KKControlxHandGal4	8	1107178	1	f	control	1.69581	1.70823	0.0561701	0.032882				0.590292	0.5854	0.0193459	0.0330473				0.376069	0.377901	0.0183676	0.0486042	0.637089	19.1795				0.214223	0.2193	0.00787741	0.0359207	0.362911	10.9254			0.0330473	0.569639	87.948	78.2338	83.0909	55.7903	42.2319	49.0111	0.410151
HandGal4xKKControl_08_1wf_93003_30s_1110178	0.74	KKControlxHandGal4	8	1110178	1	f	control	2.38062	2.37473	0.068453	0.0288256				0.420393	0.4211	0.0117203	0.0278325				0.228935	0.2316	0.0116339	0.0502329	0.544575	16.2544				0.191369	0.1895	0.00671411	0.0354307	0.455214	13.5872			0.0278325	0.835908	98.5201	85.8432	92.1816	70.3973	48.1057	59.2515	0.357231
HandGal4xKKControl_08_1wf_93003_30s_1113178	0.74	KKControlxHandGal4	8	1113178	1	f	control	2.93126	2.96912	0.355892	0.119864				0.346371	0.3369	0.0446538	0.132543				0.182491	0.175499	0.0439087	0.250194	0.526865	15.6942				0.16377	0.1684	0.00803711	0.0477263	0.472817	14.0842			0.132543	0.897415	81.4034	67.1894	74.2964	52.54	46.3609	49.4504	0.334417
HandGal4xKKControl_09_1wf_93003_30s_1107179	0.74	KKControlxHandGal4	9	1107179	1	f	control	1.42328	1.51837	0.245829	0.161903				0.726713	0.658401	0.169837	0.257953				0.562066	0.499901	0.159818	0.3197	0.773436	23.0447				0.164766	0.1586	0.0112305	0.07081	0.226728	6.7554			0.257953	0.293143	94.7662	93.2664	94.0163	65.9265	64.448	65.1872	0.306639
HandGal4xKKControl_09_1wf_93003_30s_1110179	0.74	KKControlxHandGal4	9	1110179	1	f	control	3.19598	3.16656	0.0492761	0.0155614				0.312941	0.3158	0.00481314	0.0152411				0.163607	0.161401	0.00475577	0.0294656	0.522805	15.7063				0.149311	0.1474	0.00366436	0.02486	0.47712	14.1845			0.0152411	0.912615	99.9548	71.7914	85.8731	65.6268	42.7026	54.1647	0.369248
HandGal4xKKControl_09_1wf_93003_30s_1113179	0.74	KKControlxHandGal4	9	1113179	1	f	control	2.74898	2.79409	0.729718	0.261165				0.414076	0.3579	0.212569	0.593935				0.136909	0.1474	0.0377401	0.256039	0.330636	9.4467				0.298222	0.196501	0.284648	1.44859	0.720209	20.5773			0.593935	2.17825	94.5493	93.2429	93.8961	51.8845	49.5855	50.735	0.459669
HandGal4xKKControl_10_1wf_93003_30s_11071710	0.74	KKControlxHandGal4	10	11071710	1	f	control	2.03505	2.0496	0.0689786	0.0336547				0.491925	0.4879	0.016701	0.0342305				0.313426	0.317	0.0159138	0.0502014	0.637143	19.119				0.178498	0.1828	0.00727381	0.039791	0.362857	10.8884			0.0342305	0.569507	91.1673	90.2254	90.6963	66.0095	56.2059	61.1077	0.326238
HandGal4xKKControl_10_1wf_93003_30s_11101710	0.74	KKControlxHandGal4	10	11101710	1	f	control	2.64628	2.59068	0.243514	0.0939962				0.380335	0.386	0.0280791	0.0727439				0.206466	0.2106	0.0281422	0.133629	0.542853	16.3108				0.173921	0.1754	0.00344006	0.0196126	0.457283	13.5658			0.0727439	0.84237	85.1129	76.9742	81.0435	59.2046	44.0595	51.6321	0.362909
HandGal4xKKControl_10_1wf_93003_30s_11131710	0.74	KKControlxHandGal4	10	11131710	1	f	control	3.6115	3.56253	0.386833	0.108584				0.280266	0.2807	0.0333212	0.118708				0.105996	0.105301	0.0199121	0.189097	0.378198	11.3416				0.174329	0.168499	0.0332506	0.197334	0.622014	18.4789			0.118708	1.64468	94.7316	91.4521	93.0919	57.72	58.689	58.2045	0.374762
HandGal4xKKControl_11_1wf_93003_30s_11071711	0.74	KKControlxHandGal4	11	11071711	1	f	control	1.57353	1.54727	0.102522	0.0662598				0.637934	0.646299	0.0394613	0.0610573				0.431419	0.438999	0.0371644	0.0846572	0.676275	20.2767				0.206536	0.2073	0.00467666	0.0225598	0.323757	9.91371			0.0610573	0.478735	99.2594	80.7821	90.0207	62.9044	56.3178	59.6111	0.337807
HandGal4xKKControl_11_1wf_93003_30s_11101711	0.74	KKControlxHandGal4	11	11101711	1	f	control	3.95276	3.9588	0.659818	0.166671				0.264751	0.252602	0.0762566	0.301885				0.0878903	0.0911999	0.0232635	0.255082	0.331973	9.9316				0.177002	0.1544	0.0800177	0.518249	0.66856	20.0012			0.301885	2.01389	89.5889	77.6436	83.6163	54.805	42.3808	48.5929	0.418859
HandGal4xKKControl_11_1wf_93003_30s_11131711	0.74	KKControlxHandGal4	11	11131711	1	f	control	2.81733	2.79408	0.0435546	0.0155882				0.355006	0.3579	0.00545744	0.0152485				0.196013	0.1965	0.00433021	0.0220367	0.55214	16.4651				0.159021	0.1614	0.00409079	0.0253457	0.44794	13.5168			0.0152485	0.811279	92.1203	66.637	79.3787	58.5349	42.9455	50.7402	0.360783
HandGal4xKKControl_12_1wf_93003_30s_11071712	0.74	KKControlxHandGal4	12	11071712	1	f	control	1.72023	1.78285	0.182344	0.102277				0.588523	0.5609	0.0783221	0.139636				0.440583	0.4146	0.0678936	0.163757	0.748625	13.2175				0.147893	0.1463	0.0127649	0.087251	0.251296	4.5847			0.139636	0.335676	89.54		89.54	56.9992		56.9992	0.363422
HandGal4xKKControl_12_1wf_93003_30s_11101712	0.74	KKControlxHandGal4	12	11101712	1	f	control	1.34763	1.33173	0.138067	0.103674				0.749151	0.7509	0.0706138	0.0940389				0.570108	0.575499	0.0705249	0.122546	0.761005	22.2342				0.17913	0.1824	0.00479559	0.0262917	0.239111	7.1652			0.0940389	0.314204	108.783	81.806	95.2943	74.7437	46.9069	60.8253	0.361711
HandGal4xKKControl_12_1wf_93003_30s_11131712	0.74	KKControlxHandGal4	12	11131712	1	f	control	2.20299	2.19202	0.117775	0.053729				0.454997	0.4562	0.0203231	0.0445487				0.276292	0.280699	0.0215806	0.0768817	0.60724	17.959				0.178656	0.1824	0.00777695	0.0426368	0.392653	11.7913			0.0445487	0.64662	105.843	89.4911	97.6672	68.9194	55.1039	62.0117	0.365072
HandGal4xKKControl_13_1wf_93003_30s_11071713	0.74	KKControlxHandGal4	13	11071713	1	f	control	1.46648	1.43905	0.172847	0.120112				0.688774	0.6949	0.0615772	0.0886131				0.509567	0.512199	0.0583988	0.114016	0.739818	21.9114				0.179009	0.1709	0.0165416	0.0967909	0.259895	7.8764			0.0886131	0.351296	91.1673		91.1673	57.8385		57.8385	0.365579
HandGal4xKKControl_13_1wf_93003_30s_11131713	0.74	KKControlxHandGal4	13	11131713	1	f	control	2.15935	2.12631	0.200071	0.0940929				0.465767	0.4702	0.0298441	0.0634711				0.309027	0.3158	0.0308599	0.0977199	0.66348	19.4687				0.156703	0.1544	0.00420961	0.0272643	0.336441	10.029			0.0634711	0.507086	96.5438	86.3298	91.4368	55.6232	50.8612	53.2422	0.417716
HandGal4xKKControl_14_1wf_93003_30s_11071714	0.74	KKControlxHandGal4	14	11071714	1	f	control	1.55437	1.51883	0.201958	0.132969				0.651274	0.6584	0.0654122	0.0993503				0.463111	0.4757	0.0546596	0.114903	0.711085	21.3031				0.188051	0.182899	0.0370573	0.20261	0.288743	8.8384			0.0993503	0.406061	72.8252		72.8252	49.1139		49.1139	0.325591
HandGal4xKKControl_14_1wf_93003_30s_11131714	0.74	KKControlxHandGal4	14	11131714	1	f	control	2.79654	2.79408	0.121403	0.0434502				0.358269	0.357901	0.0157905	0.0441197				0.156824	0.1544	0.0169299	0.10965	0.437727	13.1732				0.201247	0.2035	0.00515941	0.0253534	0.561721	16.7035			0.0441197	1.28327	96.2114	81.4	88.8057	50.3254	45.1643	47.7448	0.462367
HandGal4xKKControl_15_1wf_93003_30s_11081715	0.74	KKControlxHandGal4	15	11081715	1	f	control	3.79281	3.74955	0.188154	0.0501804				0.264272	0.266699	0.0129939	0.0487211				0.0956496	0.0981998	0.0169548	0.172656	0.361937	10.8084				0.168559	0.168401	0.0113919	0.0676475	0.637824	19.2157			0.0487211	1.76225	97.6912	63.64	80.6656	57.739	42.9455	50.3422	0.375914
HandGal4xKKControl_16_1wf_93003_30s_11081716	0.74	KKControlxHandGal4	16	11081716	1	f	control	3.05298	3.03123	0.0963475	0.0317849				0.327853	0.329802	0.0100757	0.0305509				0.16173	0.161402	0.0101441	0.06285	0.493302	14.8792				0.165964	0.1684	0.00463793	0.0275412	0.506214	15.1027			0.0305509	1.02617	83.62	56.826	70.223	47.3658	26.4129	36.8894	0.474683
HandGal4xKKControl_17_1wf_93003_30s_11081717	0.74	KKControlxHandGal4	17	11081717	1	f	control	2.21112	2.22618	0.0425843	0.0191289				0.452408	0.4492	0.00878137	0.0195489				0.257735	0.2596	0.00833233	0.0320968	0.569697	16.7528				0.1947	0.1965	0.00539673	0.0274643	0.430364	12.8502			0.0195489	0.755426	87.3231	67.3441	77.3336	54.0656	38.4871	46.2764	0.401601
HandGal4xKKControl_18_1wf_93003_30s_11081718	0.74	KKControlxHandGal4	18	11081718	1	f	control	3.2074	3.16656	0.237383	0.0749657				0.313309	0.3158	0.0212394	0.067256				0.144646	0.154301	0.022415	0.145268	0.461672	13.7414				0.168588	0.1684	0.0073756	0.0437982	0.538086	16.1844			0.067256	1.16552	94.3986	88.954	91.6763	58.103	55.3617	56.7323	0.381167
HandGal4xKKControl_19_1wf_93003_30s_11081719	0.74	KKControlxHandGal4	19	11081719	1	f	control	3.91227	3.95728	0.323379	0.0817174				0.257558	0.252699	0.0248055	0.0981624				0.113751	0.1123	0.0253632	0.225852	0.441652	13.1951				0.143807	0.1404	0.00672328	0.0478867	0.558348	16.6816			0.0981624	1.26423	102.871	72.5238	87.6972	65.1242	43.149	54.1366	0.382687
HandGal4xKKControl_20_1wf_93003_30s_11081720	0.74	KKControlxHandGal4	20	11081720	1	f	control	2.17561	2.12676	0.205308	0.0965356				0.46287	0.4702	0.037715	0.0802105				0.282261	0.2878	0.0362594	0.125988	0.609806	18.0647				0.180834	0.1825	0.00639756	0.0350551	0.390681	11.5734			0.0802105	0.640664	70.4906	69.5639	70.0273	40.9415	39.227	40.0842	0.427591
HandGal4xKKControl_21_1wf_93003_30s_11081721	0.74	KKControlxHandGal4	21	11081721	1	f	control	3.32518	3.31346	0.177128	0.0534571				0.301499	0.3018	0.0158214	0.0524236				0.132851	0.133299	0.0138677	0.104034	0.440633	13.1522				0.168721	0.1684	0.00423492	0.025148	0.559608	16.7034			0.0524236	1.27001	75.5126	74.2364	74.8745	45.14	41.6049	43.3724	0.420732
HandGal4xKKControl_22_1wf_93003_30s_11081722	0.74	KKControlxHandGal4	22	11081722	1	f	control	2.52168	2.54388	0.0476697	0.018739				0.396672	0.393101	0.00752816	0.0191507				0.212766	0.2106	0.00652923	0.031003	0.536377	16.1702				0.183971	0.1825	0.00395788	0.021687	0.463785	13.7978			0.0191507	0.864663	86.6938	77.8725	82.2831	58.103	46.9069	52.5049	0.361899
HandGal4xKKControl_23_1wf_93003_30s_11081723	0.74	KKControlxHandGal4	23	11081723	1	f	control	2.21024	1.9253	0.988117	0.513227				0.542064	0.5193	0.221497	0.42653				0.290684	0.175501	0.249133	1.41956	0.536254	15.9876				0.250652	0.2035	0.141723	0.69643	0.462403	14.0365			0.42653	0.862284	82.3531	68.8836	75.6183	52.6701	42.206	47.438	0.372665
HandGal4xKKControl_24_1wf_93003_30s_11081724	0.74	KKControlxHandGal4	24	11081724	1	f	control	1.5236	1.51584	0.0571175	0.0376804				0.65722	0.6597	0.0239032	0.0362334				0.439184	0.442101	0.0241119	0.0545394	0.668246	19.7633				0.218026	0.2176	0.00342344	0.0157327	0.33174	10.0292			0.0362334	0.496434	101.599	85.1515	93.375	63.9148	50.667	57.2909	0.386443
HandGal4xKKControl_25_1wf_93003_30s_11081725	0.74	KKControlxHandGal4	25	11081725	1	f	control	3.53683	3.47464	0.185075	0.0532646				0.283404	0.287701	0.0141726	0.0492616				0.139175	0.1473	0.0158013	0.107273	0.491082	14.7525				0.144271	0.147301	0.0046198	0.031363	0.509064	15.2927			0.0492616	1.03662	88.8123	90.7911	89.8017	56.9992	63.6787	60.339	0.328087
HandGal4xKKControl_26_1wf_93003_30s_11081726	0.74	KKControlxHandGal4	26	11081726	1	f	control	2.93796	2.90867	0.0656035	0.0225544				0.340506	0.3438	0.00748483	0.0217709				0.191668	0.189501	0.00799472	0.0421883	0.562892	16.6751				0.148742	0.1474	0.00512833	0.0347919	0.436827	13.0893			0.0217709	0.776041	74.0592	65.1368	69.598	45.886	40.0216	42.9538	0.38283
HandGal4xKKControl_27_1wf_93003_30s_11081727	0.74	KKControlxHandGal4	27	11081727	1	f	control	2.79071	2.74048	0.118966	0.0434105				0.358861	0.3649	0.0149577	0.0409911				0.177455	0.1824	0.0139693	0.076586	0.494494	14.9062				0.181552	0.1825	0.00317625	0.0174041	0.50591	15.0688			0.0409911	1.02309	87.4328	77.1341	82.2835	57.1	49.1139	53.107	0.354585
HandGal4xCG14457_01_1wf_93003_30s_1110171	0.74	CG14457xHandGal4	1	1110171	1	f	random	1.367	1.34427	0.268753	0.199925				0.749877	0.7439	0.10037	0.134924				0.558033	0.5544	0.100391	0.18108	0.744167	21.7633				0.191963	0.189501	0.00496021	0.0261752	0.255992	7.6785			0.134924	0.343998	88.0227	80.0056	84.0141	59.4262	49.7784	54.6023	0.350082
HandGal4xCG14457_02_1wf_93003_30s_1110172	0.74	CG14457xHandGal4	2	1110172	1	f	random	1.54739	1.54871	0.0545779	0.035241				0.647057	0.6457	0.0229221	0.0354995				0.449785	0.4492	0.023085	0.0513913	0.695124	20.6901				0.197272	0.196501	0.00344087	0.0175107	0.304876	9.0745			0.0354995	0.438591	96.9513	96.1915	96.5714	69.5639	58.8381	64.201	0.335196
HandGal4xCG14457_03_1wf_93003_30s_1110173	0.74	CG14457xHandGal4	3	1110173	1	f	random	2.21658	2.09512	0.332922	0.158903				0.459808	0.477301	0.0645849	0.135313				0.313959	0.336901	0.0662043	0.19651	0.682806	20.0934				0.145763	0.1474	0.00417967	0.028356	0.317009	9.4746			0.135313	0.464273	104.406	83.1603	93.783	70.3039	54.3887	62.3463	0.335206
HandGal4xCG14457_04_1wf_93003_30s_1110174	0.74	CG14457xHandGal4	4	1110174	1	f	random	1.94368	1.95198	0.251122	0.12865				0.522987	0.5124	0.0669605	0.13068				0.356186	0.350901	0.0669215	0.190713	0.68106	19.9464				0.166707	0.1684	0.00508577	0.0302006	0.318759	9.5023			0.13068	0.468034	90.2921	71.2286	80.7604	60.013	46.9069	53.46	0.338042
HandGal4xCG14457_05_1wf_93003_30s_1110175	0.74	CG14457xHandGal4	5	1110175	1	f	random	1.7297	1.73762	0.0913691	0.0525829				0.57999	0.5755	0.0357908	0.0621909				0.391092	0.386	0.0352164	0.0912342	0.674308	19.9457				0.18881	0.1895	0.00511497	0.0269919	0.32554	9.6293			0.0621909	0.482776	97.2812	68.1443	82.7127	66.7478	41.9718	54.3598	0.342788
HandGal4xCG14457_06_1wf_93003_30s_1110176	0.74	CG14457xHandGal4	6	1110176	1	f	random	3.25561	3.23834	0.122001	0.037674				0.307574	0.3088	0.0112077	0.0362942				0.159264	0.1614	0.00879774	0.054509	0.517808	15.6079				0.148404	0.1474	0.00705752	0.0478801	0.482498	14.3952			0.0362942	0.93181	106.56	88.8277	97.6939	68.82	59.2046	64.0123	0.344766
HandGal4xCG14457_07_1wf_93003_30s_1110177	0.74	CG14457xHandGal4	7	1110177	1	f	random	2.74669	2.74047	0.0471383	0.0172008				0.36418	0.364901	0.00624232	0.0171069				0.210119	0.2106	0.0140974	0.0669393	0.576965	17.2298				0.153981	0.1474	0.01637	0.111059	0.422814	12.7804			0.0171069	0.732825	97.9068	85.9197	91.9132	63.5237	57.1527	60.3382	0.343531
HandGal4xCG14457_08_1wf_93003_30s_1110178	0.74	CG14457xHandGal4	8	1110178	1	f	random	2.4242	2.41488	0.0405672	0.0167989				0.412617	0.414099	0.00687372	0.0165992				0.251601	0.2526	0.0064959	0.0257162	0.60977	18.3669				0.160932	0.1614	0.00218775	0.0135548	0.390028	11.5871			0.0165992	0.639631	88.5066	82.9328	85.7197	62.5158	45.9754	54.2456	0.367175
HandGal4xCG14457_09_1wf_93003_30s_1110179	0.74	CG14457xHandGal4	9	1110179	1	f	random	1.42883	1.39704	0.158064	0.113142				0.706338	0.7159	0.0614298	0.0858078				0.520024	0.5264	0.0608692	0.115633	0.736225	21.841				0.186388	0.189499	0.00467346	0.0246622	0.26388	8.0147			0.0858078	0.358423	90.2921	51.9899	71.141	58.4647	32.5095	45.4871	0.360607
HandGal4xCG14457_10_1wf_93003_30s_11101710	0.74	CG14457xHandGal4	10	11101710	1	f	random	3.40336	3.39213	0.125034	0.0368601				0.294212	0.2948	0.0105484	0.0357816				0.154405	0.1545	0.0101182	0.0654898	0.524809	15.7493				0.13988	0.1404	0.00319192	0.0227345	0.475441	14.2678			0.0357816	0.905931	102.927	86.7348	94.8307	68.1162	56.9992	62.5577	0.340322
HandGal4xCG14457_11_1wf_93003_30s_11101711	0.74	CG14457xHandGal4	11	11101711	1	f	random	1.76986	1.60102	0.38851	0.242664				0.582516	0.6246	0.0990744	0.158621				0.38958	0.428201	0.0981861	0.229299	0.66879	19.8686				0.193138	0.189501	0.00842409	0.0444541	0.331559	10.0432			0.158621	0.49576	89.5675	76.3098	82.9386	58.5349	48.8904	53.7127	0.352381
HandGal4xCG14457_12_1wf_93003_30s_11101712	0.74	CG14457xHandGal4	12	11101712	1	f	random	2.40128	2.41487	0.149043	0.0617188				0.41823	0.414101	0.0295618	0.071388				0.257236	0.252701	0.0311687	0.123342	0.61506	18.521				0.161127	0.1614	0.00381512	0.0236377	0.385259	11.44			0.071388	0.626377	95.6004	77.9252	86.7628	72.5804	51.1082	61.8443	0.287203
HandGal4xCG14457_13_1wf_93003_30s_11101713	0.74	CG14457xHandGal4	13	11101713	1	f	random	3.47741	3.47584	0.0425331	0.0122368				0.287613	0.287701	0.00350459	0.0121814				0.129366	0.1264	0.0049641	0.0392729	0.449793	13.4541				0.158247	0.1613	0.00483137	0.0299527	0.550207	16.4577			0.0121814	1.22325	102.123	97.1178	99.6202	69.5757	57.9142	63.745	0.36012
HandGal4xCG14457_15_1wf_93003_30s_11101715	0.74	CG14457xHandGal4	15	11101715	1	f	random	1.96486	1.97863	0.222354	0.112378				0.515288	0.5053	0.0581338	0.115048				0.339531	0.3368	0.0549029	0.163014	0.658915	19.6928				0.175828	0.1755	0.00707751	0.0403277	0.341222	10.198			0.115048	0.517854	108.984	98.2279	103.606	73.2936	60.7071	67.0003	0.353315
HandGal4xCG14457_16_1wf_93003_30s_11101716	0.74	CG14457xHandGal4	16	11101716	1	f	random	1.68008	1.60077	0.809524	0.505708				0.773335	0.624699	0.411605	0.658886				0.551776	0.400099	0.410619	1.02629	0.713501	20.4157				0.221639	0.217602	0.00910199	0.0418287	0.286602	8.4223			0.658886	0.401684	91.02	75.5706	83.2953	59.2	42.2384	50.7192	0.391092
HandGal4xCG14457_17_1wf_93003_30s_11101717	0.74	CG14457xHandGal4	17	11101717	1	f	random	1.48167	1.48412	0.0460906	0.0310559				0.675549	0.6738	0.0206232	0.0306073				0.473891	0.4772	0.0201558	0.0422376	0.70149	20.8512				0.201936	0.2035	0.0080608	0.0396108	0.298922	8.8852			0.0306073	0.426124	91.7719	80.139	85.9554	62.1776	45.2369	53.7073	0.375173
HandGal4xCG14457_18_1wf_93003_30s_11101718	0.74	CG14457xHandGal4	18	11101718	1	f	random	1.73068	1.73762	0.040429	0.0232669				0.57811	0.5755	0.0135141	0.0234824				0.396671	0.4	0.0136515	0.0341287	0.686152	20.6269				0.181643	0.1825	0.00278293	0.0152489	0.314202	9.26381			0.0234824	0.457919	103.03	81.4135	92.2218	71.0439	54.0251	62.5345	0.321913
HandGal4xCG14457_19_1wf_93003_30s_11101719	0.74	CG14457xHandGal4	19	11101719	1	f	random	1.72635	1.73762	0.0495788	0.0285326				0.579708	0.5825	0.0164234	0.0281947				0.393151	0.393	0.016757	0.0426387	0.678188	20.0507				0.1873	0.1895	0.00439291	0.0231816	0.323094	9.5523			0.0281947	0.476408	92.8309	63.64	78.2355	62.6951	39.3941	51.0446	0.347552
HandGal4xCG14457_20_1wf_93003_30s_11101720	0.74	CG14457xHandGal4	20	11101720	1	f	random	2.45776	2.45699	0.269114	0.10953				0.412031	0.407099	0.048064	0.118065				0.240833	0.2386	0.0473918	0.198625	0.584502	17.5808				0.172921	0.1754	0.00493247	0.0281213	0.41968	12.4503			0.118065	0.718012	92.6449	66.456	79.5504	62.27	42.9583	52.6141	0.338607
HandGal4xCG14457_21_1wf_93003_30s_11101721	0.74	CG14457xHandGal4	21	11101721	1	f	random	2.97685	2.90783	0.239085	0.082221				0.337834	0.3439	0.0256792	0.0746706				0.15661	0.1544	0.0296719	0.192176	0.463571	13.9383				0.181055	0.1894	0.0146218	0.0772005	0.535929	16.1139			0.0746706	1.15609	93.2429		93.2429	64.38		64.38	0.309546
HandGal4xCG14457_22_1wf_93003_30s_11101722	0.74	CG14457xHandGal4	22	11101722	1	f	random	1.66113	1.65673	0.0515089	0.0310908				0.602567	0.6036	0.0183532	0.0304062				0.447314	0.4492	0.0181826	0.0404778	0.742347	21.9184				0.155236	0.1544	0.00313532	0.0203065	0.257624	7.7618			0.0304062	0.34704	104.35	85.1804	94.7654	74.7437	58.4787	66.6112	0.297094
HandGal4xCG14457_23_1wf_93003_30s_11101723	0.74	CG14457xHandGal4	23	11101723	1	f	random	2.81105	2.79407	0.220271	0.0788351				0.357761	0.358001	0.0261535	0.0730543				0.199723	0.2036	0.0282214	0.138612	0.558257	16.577				0.158079	0.1544	0.0117169	0.0758868	0.441855	13.2786			0.0730543	0.79149	112.48	83.7378	98.1089	73.2749	51.1082	62.1916	0.366096
HandGal4xCG14457_24_1wf_93003_30s_11101724	0.74	CG14457xHandGal4	24	11101724	1	f	random	1.96515	1.97863	0.0509883	0.0257695				0.509186	0.505402	0.0133295	0.026374				0.339898	0.337	0.0128404	0.0381022	0.667532	19.7141				0.169273	0.1684	0.00276067	0.0163935	0.332438	9.9871			0.026374	0.498011	88.3115	69.2997	78.8056	58.5349	46.5965	52.5657	0.33297
HandGal4xCG14457_25_1wf_93003_30s_11101725	0.74	CG14457xHandGal4	25	11101725	1	f	random	3.43063	3.56252	0.594561	0.166893				0.300934	0.2807	0.0597777	0.212959				0.143911	0.1193	0.0620156	0.519829	0.478214	14.2472				0.156997	0.1544	0.00470932	0.0305008	0.521699	15.6997			0.212959	1.09093	98.7949	84.713	91.7539	59.4262	50.2547	54.8404	0.40231
HandGal4xCG14457_26_1wf_93003_30s_11101726	0.74	CG14457xHandGal4	26	11101726	1	f	random	2.12682	2.12676	0.0608949	0.0286328				0.470554	0.4702	0.0130275	0.0277063				0.307584	0.3088	0.0127768	0.0413757	0.653664	19.3778				0.162945	0.1614	0.00371868	0.0230402	0.346284	10.4285			0.0277063	0.529759	93.3134	88.1346	90.724	66.6164	59.2462	62.9313	0.306343
HandGal4xCG14457_27_1wf_93003_30s_11101727	0.74	CG14457xHandGal4	27	11101727	1	f	random	2.26512	2.29779	0.213234	0.0927996				0.454458	0.4352	0.143093	0.328799				0.272852	0.252701	0.143077	0.566192	0.60039	17.7354				0.18162	0.182499	0.00323722	0.0177383	0.39964	11.9869			0.328799	0.665634	96.5438	82.1433	89.3436	68.2246	56.9848	62.6047	0.299281
HandGal4xCG14457_28_1wf_93003_30s_11101728	0.74	CG14457xHandGal4	28	11101728	1	f	random	1.62993	1.61917	0.0444276	0.0274385				0.61395	0.617599	0.0166073	0.0268901				0.414369	0.414101	0.0162101	0.0391453	0.674923	19.8897				0.199518	0.1966	0.00453667	0.0230756	0.324975	9.7764			0.0268901	0.481499	76.992	91.0471	84.0195	56.2595	43.8165	50.038	0.404448
HandGal4xCG3262KK_01_1wf_93003_30s_1113171	0.74	CG3262xHandGal4	1	1113171	1	f	random	1.969	1.95198	0.0630329	0.0322917				0.508343	0.5123	0.0158298	0.0308994				0.32574	0.329899	0.0164524	0.0498709	0.640787	18.8929				0.182602	0.1825	0.00328975	0.018026	0.35921	10.7735			0.0308994	0.560576	93.5332	75.7733	84.6532	66.2744	47.4524	56.8634	0.328278
HandGal4xCG3262KK_02_1wf_93003_30s_1113172	0.74	CG3262xHandGal4	2	1113172	1	f	random	3.26932	3.31346	0.208812	0.0630195				0.307068	0.3018	0.0199376	0.0660625				0.156798	0.1544	0.0160712	0.104088	0.510629	15.2094				0.150241	0.1474	0.00776279	0.0526648	0.489275	14.7236			0.0660625	0.958181	104.434	88.9971	96.7158	62.9392	58.103	60.5211	0.374238
HandGal4xCG3262KK_03_1wf_93003_30s_1113173	0.74	CG3262xHandGal4	3	1113173	1	f	random	2.6672	2.63852	0.309403	0.117264				0.380068	0.379	0.0447896	0.118178				0.224323	0.2246	0.0404645	0.180163	0.590218	17.7215				0.155909	0.154401	0.00824064	0.0533717	0.410213	12.3168			0.118178	0.69502	79.1938	77.5589	78.3764	57.7627	55.7412	56.7519	0.275905
HandGal4xCG3262KK_04_1wf_93003_30s_1113174	0.74	CG3262xHandGal4	4	1113174	1	f	random	2.63438	2.59068	0.206521	0.079717				0.381508	0.386	0.0256787	0.0665251				0.221973	0.2246	0.0305178	0.135876	0.581831	17.3139				0.159535	0.1614	0.00994577	0.061622	0.418169	12.4437			0.0665251	0.718712	85.4211	83.7378	84.5795	60.2316	54.765	57.4983	0.320186
HandGal4xCG3262KK_05_1wf_93003_30s_1113175	0.74	CG3262xHandGal4	5	1113175	1	f	random	2.27514	2.22667	0.409728	0.184009				0.453318	0.4492	0.0789414	0.175738				0.292221	0.280701	0.0784397	0.279443	0.644627	19.2866				0.161097	0.1614	0.0148409	0.0919514	0.355373	10.6324			0.175738	0.551284	111.63	108.164	109.897	75.2657	64.3843	69.825	0.364632
HandGal4xCG3262KK_06_1wf_93003_30s_1113176	0.74	CG3262xHandGal4	6	1113176	1	f	random	2.68573	2.63852	0.188156	0.0713111				0.373811	0.379	0.0224874	0.0593337				0.198351	0.203501	0.0206481	0.101465	0.530619	15.8681				0.17546	0.182401	0.0128998	0.0707225	0.469381	14.0368			0.0593337	0.884592	107.829	80.4186	94.124	61.5669	46.1537	53.8603	0.427773
HandGal4xCG3262KK_07_1wf_93003_30s_1113177	0.74	CG3262xHandGal4	7	1113177	1	f	random	2.62597	2.63852	0.0678574	0.025718				0.381056	0.379	0.00983222	0.0259425				0.189221	0.189501	0.00917217	0.0484017	0.496569	14.7592				0.191806	0.1895	0.00789925	0.0416847	0.503354	15.1527			0.0259425	1.01366	109.142	88.0631	98.6025	66.8011	45.9039	56.3525	0.428488
HandGal4xCG3262KK_08_1wf_93003_30s_1113178	0.74	CG3262xHandGal4	8	1113178	1	f	random	2.52955	2.457	0.242725	0.0987889				0.397955	0.407	0.0302718	0.074378				0.225433	0.2316	0.0296203	0.127894	0.566479	16.9075				0.172831	0.1754	0.00425779	0.0242748	0.434297	12.9623			0.074378	0.76666	115.781	87.3702	101.576	89.9793	61.3977	75.6885	0.254856
HandGal4xCG3262KK_09_1wf_93003_30s_1113179	0.74	CG3262xHandGal4	9	1113179	1	f	random	2.82871	2.79408	0.172071	0.0615841				0.354674	0.3579	0.0199813	0.0558295				0.18536	0.1894	0.0194518	0.102702	0.522621	15.7556				0.169279	0.168402	0.00307967	0.0182876	0.47728	14.2194			0.0558295	0.913242	100.643	90.5828	95.6127	68.0961	54.1466	61.1213	0.360741
HandGal4xCG3262KK_10_1wf_93003_30s_11131710	0.74	CG3262xHandGal4	10	11131710	1	f	random	2.0472	2.00682	0.320639	0.159775				0.500403	0.498301	0.0797312	0.160006				0.30283	0.3018	0.0671511	0.222502	0.605171	18.4726				0.196152	0.1895	0.0368582	0.194503	0.391987	11.7691			0.160006	0.64773	114.573	73.2637	93.9186	77.6542	46.6728	62.1635	0.338113
HandGal4xCG3262KK_11_1wf_93003_30s_11131711	0.74	CG3262xHandGal4	11	11131711	1	f	random	2.06443	2.06526	0.345241	0.167166				0.497107	0.4842	0.0841967	0.173888				0.299323	0.3018	0.0435188	0.144198	0.602131	17.9594				0.198038	0.1824	0.0623758	0.341973	0.398382	11.8823			0.173888	0.66162	127.385	77.7564	102.571	74.9193	43.0219	58.9706	0.425074
HandGal4xCG3262KK_12_1wf_93003_30s_11131712	0.74	CG3262xHandGal4	12	11131712	1	f	random	2.01595	2.00682	0.220831	0.11004				0.501627	0.498301	0.0520598	0.104475				0.300273	0.3088	0.054508	0.176516	0.598598	18.0164				0.202093	0.2035	0.00894782	0.0439696	0.402876	11.9235			0.104475	0.673032	119.967	91.3833	105.675	85.6484	61.1296	73.389	0.305522
HandGal4xCG3262KK_13_1wf_93003_30s_11131713	0.74	CG3262xHandGal4	13	11131713	1	f	random	1.80988	2.03541	0.455387	0.223732				0.588296	0.491301	0.190631	0.388014				0.41188	0.3158	0.192444	0.609387	0.700124	21.0059				0.176416	0.1754	0.0117415	0.0669413	0.299876	8.9972			0.388014	0.428318	101.423	86.6085	94.0158	84.4119	72.5804	78.4961	0.165075
HandGal4xCG3262KK_14_1wf_93003_30s_11131714	0.74	CG3262xHandGal4	14	11131714	1	f	random	1.90392	1.85048	0.362395	0.195838				0.539769	0.5404	0.0811797	0.150222				0.358695	0.358	0.0770124	0.215119	0.664533	19.7282				0.181098	0.182499	0.0127671	0.0699573	0.33551	10.1415			0.150222	0.504881	113.96	110.327	112.144	77.7317	74.9412	76.3365	0.319297
HandGal4xCG3262KK_15_1wf_93003_30s_11131715	0.74	CG3262xHandGal4	15	11131715	1	f	random	2.22319	2.22618	0.0597438	0.0268369				0.450126	0.4492	0.0120604	0.0268485				0.271203	0.2737	0.0141912	0.0518494	0.602505	18.1706				0.17896	0.1824	0.00774969	0.0424874	0.397579	11.8114			0.0268485	0.659876	103.769	93.3515	98.5603	71.5048	64.8039	68.1544	0.308501
HandGal4xCG3262KK_16_1wf_93003_30s_11131716	0.74	CG3262xHandGal4	16	11131716	1	f	random	2.88129	2.90783	0.281181	0.0966979				0.351904	0.3439	0.0512292	0.148965				0.189329	0.175501	0.0521439	0.297115	0.538015	16.093				0.162574	0.1614	0.00527464	0.0326806	0.461985	13.8188			0.148965	0.858684	83.3544		83.3544	52.7947		52.7947	0.366623
HandGal4xCG3262KK_17_1wf_93003_30s_11131717	0.74	CG3262xHandGal4	17	11131717	1	f	random	2.3072	2.26193	0.240577	0.106359				0.437919	0.442101	0.0452757	0.102411				0.258028	0.2596	0.0366583	0.141211	0.589214	17.5459				0.179826	0.182499	0.0191324	0.104835	0.410638	12.408			0.102411	0.696925	100.773	84.3535	92.5634	71.9172	48.3781	60.1477	0.3502
HandGal4xCG3262KK_18_1wf_93003_30s_11131718	0.74	CG3262xHandGal4	18	11131718	1	f	random	2.30915	2.29832	0.0431628	0.0187801				0.4332	0.4351	0.00795668	0.018287				0.264346	0.2667	0.00816423	0.030612	0.610218	18.2399				0.168854	0.168499	0.00206075	0.01223	0.389782	11.6509			0.018287	0.638759	114.078	91.527	102.802	77.1874	63.9875	70.5874	0.313367
HandGal4xCG3262KK_19_1wf_93003_30s_11131719	0.74	CG3262xHandGal4	19	11131719	1	f	random	2.77345	2.849	0.281043	0.0986462				0.364093	0.3579	0.0369097	0.103129				0.216966	0.210501	0.0386539	0.183628	0.595908	17.7912				0.147127	0.1474	0.00484181	0.0328481	0.404092	12.0644			0.103129	0.67811	98.4645	115.556	107.01	72.5804	74.2364	73.4084	0.314006
HandGal4xCG3262KK_20_1wf_93003_30s_11131720	0.74	CG3262xHandGal4	20	11131720	1	f	random	2.69814	2.68889	0.217527	0.0808983				0.374424	0.3719	0.0483059	0.129889				0.219851	0.2245	0.0202933	0.0903933	0.587172	17.5881				0.154572	0.1474	0.0331157	0.224666	0.412828	12.3658			0.129889	0.703078	102.144	72.554	87.349	71.78	48.2421	60.011	0.312974
HandGal4xCG3262KK_21_1wf_93003_30s_11131721	0.74	CG3262xHandGal4	21	11131721	1	f	random	2.53589	2.54452	0.0387301	0.015221				0.394427	0.393099	0.00598754	0.0152316				0.232338	0.2316	0.00966426	0.0417282	0.589053	17.6577				0.161978	0.1614	0.00789092	0.0488905	0.410666	12.3103			0.0152316	0.697164	102.123	92.5266	97.3247	76.2344	62.2304	69.2324	0.288645
HandGal4xCG3262KK_22_1wf_93003_30s_11131722	0.74	CG3262xHandGal4	22	11131722	1	f	random	2.8301	2.84981	0.0460563	0.0161612				0.35342	0.350901	0.00573731	0.0163503				0.196933	0.196501	0.0052585	0.0267607	0.557222	16.5424				0.156462	0.1544	0.00395593	0.0256213	0.442709	13.2993			0.0163503	0.794494	97.6912	79.1938	88.4425	70.335	56.98	63.6575	0.280238
HandGal4xCG3262KK_23_1wf_93003_30s_11131723	0.74	CG3262xHandGal4	23	11131723	1	f	random	2.24025	2.22618	0.053842	0.0241858				0.446617	0.4492	0.010593	0.023582				0.268475	0.273699	0.0121213	0.044287	0.60113	17.9878				0.177866	0.1755	0.00476408	0.0271457	0.398251	11.917			0.023582	0.662504	108.467	98.445	103.456	72.9754	59.2416	66.1085	0.361
HandGal4xCG3262KK_24_1wf_93003_30s_11131724	0.74	CG3262xHandGal4	24	11131724	1	f	random	2.51308	2.49938	0.165	0.0660165				0.39947	0.400101	0.0240897	0.060209				0.232173	0.2316	0.0364566	0.157412	0.581202	17.1808				0.1675	0.1755	0.024275	0.138319	0.419305	12.5625			0.060209	0.721445	102.069	70.7697	86.4194	83.012	47.7286	65.3703	0.243569
HandGal4xcona_01_1wf_93003_30s_1107171	0.74	conaxHandGal4	1	1107171	1	f	random	1.69976	1.70881	0.27239	0.159403				0.602426	0.5854	0.0933878	0.159528				0.352887	0.3413	0.0904875	0.265126	0.585778	30.3483				0.249473	0.2559	0.0143112	0.055925	0.414115	21.7042			0.159528	0.706949	102.12	80.6872	91.4036	71.0554	55.8737	63.4645	0.305667
HandGal4xcona_02_1wf_93003_30s_1107172	0.74	conaxHandGal4	2	1107172	1	f	random	2.0824	2.10173	0.0546764	0.026015				0.480502	0.4875	0.0135569	0.027809				0.262708	0.268101	0.0124055	0.046272	0.546738	28.3725				0.217695	0.2195	0.00663315	0.0302194	0.453058	23.7288			0.027809	0.828658	96.9513	72.9754	84.9634	65.1242	45.8681	55.4961	0.346823
HandGal4xcona_03_1wf_93003_30s_1107173	0.74	conaxHandGal4	3	1107173	1	f	random	1.60579	1.60849	0.0955384	0.0593962				0.625229	0.6217	0.0421702	0.0678305				0.414846	0.4025	0.0381149	0.0946954	0.663511	34.4322				0.210383	0.2073	0.010083	0.0486395	0.336489	17.4618			0.0678305	0.507135	96.3024	91.02	93.6612	68.2246	52.5608	60.3927	0.3552
HandGal4xcona_04_1wf_93003_30s_1107174	0.74	conaxHandGal4	4	1107174	1	f	random	1.9812	2.05002	0.206142	0.100556				0.509841	0.4879	0.0567203	0.116254				0.285933	0.268299	0.0550276	0.205098	0.560829	29.1652				0.223985	0.219501	0.0123656	0.0563351	0.439324	23.0705			0.116254	0.783348	88.088	85.1032	86.5956	51.8475	42.92	47.3838	0.452815
HandGal4xcona_05_1wf_93003_30s_1107175	0.74	conaxHandGal4	5	1107175	1	f	random	2.20212	2.21631	0.203986	0.0920386				0.458527	0.4512	0.0504312	0.111771				0.257349	0.2682	0.0384198	0.143251	0.561252	29.3378				0.201178	0.183001	0.0661433	0.361437	0.438748	22.9343			0.111771	0.781732	102.863	88.5066	95.6846	62.16	46.9944	54.5772	0.429614
HandGal4xcona_06_1wf_93003_30s_1107176	0.74	conaxHandGal4	6	1107176	1	f	random	1.95135	1.95274	0.0673824	0.0345066				0.513077	0.5121	0.0177528	0.0346667				0.317268	0.317001	0.01775	0.0559934	0.618362	32.3613				0.195688	0.1951	0.00365017	0.0187092	0.381401	19.7645			0.0346667	0.616793	98.4895	84.9938	91.7416	59.9811	55.1635	57.5723	0.372452
HandGal4xcona_07_1wf_93003_30s_1107177	0.74	conaxHandGal4	7	1107177	1	f	random	1.93756	1.9516	0.135216	0.0692845				0.518368	0.524101	0.0332744	0.0634885				0.304818	0.3049	0.0318997	0.104624	0.588034	23.1662				0.213626	0.2075	0.00988359	0.0476316	0.412112	16.4492			0.0634885	0.70083	98.0186	91.1673	94.5929	59.3155	43.0792	51.1973	0.458761
HandGal4xcona_08_1wf_93003_30s_1107178	0.74	conaxHandGal4	8	1107178	1	f	random	1.51335	1.70852	0.534803	0.313021				0.968543	0.5973	1.41389	2.36713				0.77019	0.390301	1.41399	3.62282	0.795205	23.1057				0.197855	0.1951	0.0143742	0.0736762	0.204281	6.1335			2.36713	0.256891	95.5517	92.6892	94.1205	52.9604	53.3262	53.1433	0.435369
HandGal4xcona_09_1wf_93003_30s_1107179	0.74	conaxHandGal4	9	1107179	1	f	random	1.24867	1.24254	0.0689083	0.0554574				0.8031	0.8049	0.0411606	0.0511375				0.57341	0.573101	0.043849	0.0765117	0.713996	21.7896				0.226524	0.231699	0.018137	0.0782784	0.282062	8.6079			0.0511375	0.395046	99.2869	88.5839	93.9354	68.6128	55.4655	62.0391	0.339555
HandGal4xcona_10_1wf_93003_30s_11071710	0.74	conaxHandGal4	10	11071710	1	f	random	1.63735	1.64042	0.0704813	0.0429654				0.6119	0.6095	0.0270508	0.0443819				0.38049	0.3658	0.0398416	0.108916	0.621817	18.644				0.23141	0.2318	0.0209519	0.0903878	0.378183	11.3391			0.0443819	0.608191	87.2479	79.1938	83.2208	57.4394	44.6214	51.0304	0.386807
HandGal4xcona_11_1wf_93003_30s_11071711	0.74	conaxHandGal4	11	11071711	1	f	random	2.11667	2.10305	0.198668	0.0944667				0.475724	0.4755	0.0369797	0.0777702				0.302761	0.3046	0.0444803	0.146029	0.636422	19.3767				0.172773	0.1707	0.012442	0.072888	0.36318	11.0575			0.0777702	0.570659	88.9971	92.5976	90.7974	53.6946	56.0107	54.8527	0.395878
HandGal4xcona_12_1wf_93003_30s_11071712	0.74	conaxHandGal4	12	11071712	1	f	random	1.91345	1.9073	0.0969168	0.0508136				0.523879	0.524399	0.0250274	0.0477259				0.341621	0.3414	0.0257986	0.0755671	0.652099	19.4724				0.182269	0.1829	0.0107546	0.0588006	0.347922	10.5716			0.0477259	0.533542	104.469		104.469	74.7986		74.7986	0.284008
HandGal4xcona_13_1wf_93003_30s_11071713	0.74	conaxHandGal4	13	11071713	1	f	random	1.91606	1.90731	0.0972369	0.0509812				0.523255	0.5243	0.0271481	0.0517797				0.341015	0.3414	0.0398818	0.116818	0.651719	19.7789				0.18224	0.1829	0.0165559	0.0905191	0.348281	10.5699			0.0517797	0.534403	91.0681	84.9067	87.9874	58.4787	47.6022	53.0405	0.397181
HandGal4xcona_14_1wf_93003_30s_11071714	0.74	conaxHandGal4	14	11071714	1	f	random	1.92639	1.66058	0.886111	0.533616				0.620429	0.602201	0.274358	0.455592				0.313206	0.399099	0.177687	0.44522	0.504822	15.0339				0.304667	0.1891	0.284558	1.5048	0.491059	14.9287			0.455592	0.972738	91.1883	71.6884	81.4383	62.0233	47.4582	54.7407	0.327826
HandGal4xcona_15_1wf_93003_30s_11071715	0.74	conaxHandGal4	15	11071715	1	f	random	2.28333	2.16404	0.448824	0.207401				0.450583	0.462099	0.0690627	0.149454				0.294938	0.3081	0.0722653	0.234552	0.654569	19.4659				0.155518	0.154001	0.00803031	0.0521445	0.345148	10.4197			0.149454	0.52729	93.9917	73.2749	83.6333	54.1466	42.2384	48.1925	0.423765
HandGal4xcona_16_1wf_93003_30s_11071716	0.74	conaxHandGal4	16	11071716	1	f	random	2.36447	2.37982	0.0665449	0.0279622				0.423236	0.427099	0.0119079	0.027881				0.248131	0.252	0.0123462	0.0489928	0.586271	17.6173				0.174761	0.1751	0.00188773	0.0107809	0.412917	12.2333			0.027881	0.704311	81.4538	75.4945	78.4742	56.9848	46.7139	51.8493	0.339281
HandGal4xcona_17_1wf_93003_30s_11071717	0.74	conaxHandGal4	17	11071717	1	f	random	2.9735	2.97531	0.0568479	0.0191066				0.336427	0.3361	0.00641809	0.0190958				0.19407	0.196	0.00669146	0.0341401	0.576857	17.0782				0.142409	0.1401	0.0040357	0.0288059	0.423298	12.6744			0.0190958	0.733801	96.9428	103.584	100.263	64.4183	64.7236	64.5709	0.355988
HandGal4xcona_18_1wf_93003_30s_11071718	0.74	conaxHandGal4	18	11071718	1	f	random	1.57448	1.56937	0.0580619	0.036997				0.635987	0.637199	0.0234018	0.036726				0.450389	0.4551	0.0261046	0.0573601	0.708174	21.1683				0.184283	0.1821	0.00391342	0.0214905	0.289759	8.6613			0.036726	0.409164	95.5317	96.9513	96.2415	62.5158	51.8845	57.2001	0.40566
HandGal4xcona_19_1wf_93003_30s_11071719	0.74	conaxHandGal4	19	11071719	1	f	random	2.85216	2.85633	0.0953142	0.0333695				0.35103	0.3501	0.0125733	0.0359135				0.195979	0.196001	0.00981625	0.0500827	0.558297	16.6582				0.155122	0.154099	0.00530166	0.0344044	0.441907	13.1854			0.0359135	0.791526	111.86	85.891	98.8755	69.7526	48.2421	58.9974	0.403317
HandGal4xcona_20_1wf_93003_30s_11071720	0.74	conaxHandGal4	20	11071720	1	f	random	1.43027	1.42817	0.0403344	0.0282421				0.699724	0.700199	0.0196572	0.0280737				0.492652	0.4902	0.0195936	0.0399706	0.704067	20.6914				0.207142	0.21	0.00496857	0.0236598	0.296034	8.9071			0.0280737	0.420463	85.2157	60.013	72.6144	56.3178	34.8115	45.5647	0.372512
HandGal4xcona_21_1wf_93003_30s_11071721	0.74	conaxHandGal4	21	11071721	1	f	random	1.95987	1.95656	0.0491074	0.0250988				0.51056	0.511101	0.0129086	0.0252565				0.333574	0.3292	0.0130648	0.0396864	0.653349	19.3473				0.176953	0.1751	0.00362633	0.02071	0.346585	10.4402			0.0252565	0.530475	109.592	99.2594	104.426	69.7526	54.0403	61.8964	0.407269
HandGal4xcona_22_1wf_93003_30s_11071722	0.74	conaxHandGal4	22	11071722	1	f	random	1.65817	1.6603	0.0633535	0.0381578				0.603944	0.609099	0.0233348	0.0383104				0.392698	0.3922	0.0217795	0.0555316	0.650223	19.2422				0.211353	0.2101	0.0033041	0.0157263	0.349955	10.3563			0.0383104	0.538208	106.724	90.3194	98.5219	61.4245	53.28	57.3522	0.417873
HandGal4xcona_23_1wf_93003_30s_11071723	0.74	conaxHandGal4	23	11071723	1	f	random	2.242	2.23164	0.0821058	0.0367916				0.446976	0.448101	0.0148088	0.0330478				0.28281	0.2871	0.0154732	0.0538949	0.63272	18.9483				0.164018	0.1611	0.00514547	0.0319395	0.366951	10.8252			0.0330478	0.579958	91.1282	75.182	83.1551	56.9848	36.8666	46.9257	0.435685
HandGal4xcona_24_1wf_93003_30s_11071724	0.74	conaxHandGal4	24	11071724	1	f	random	2.26777	2.23165	0.0917909	0.0411315				0.44156	0.448099	0.0173744	0.0387735				0.260649	0.266	0.0159305	0.0598893	0.590292	17.4635				0.180928	0.182099	0.00283405	0.0155632	0.409748	12.3031			0.0387735	0.694144	99.3366	86.3774	92.857	73.6328	52.4357	63.0342	0.321169
HandGal4xcona_25_1wf_93003_30s_11071725	0.74	conaxHandGal4	25	11071725	1	f	random	2.37997	2.38038	0.0465016	0.0195354				0.420334	0.420101	0.00819772	0.0195137				0.234176	0.2311	0.00927272	0.0401242	0.557118	16.3923				0.186101	0.189	0.00451601	0.0238943	0.442746	13.2132			0.0195137	0.794708	88.3704	86.6085	87.4894	52.9604	48.1228	50.5416	0.422312
HandGal4xcona_26_1wf_93003_30s_11071726	0.74	conaxHandGal4	26	11071726	1	f	random	2.12468	2.13129	0.051451	0.0241408				0.470927	0.4692	0.011358	0.0242072				0.293978	0.2941	0.0109097	0.0370951	0.624253	18.5206				0.177028	0.1751	0.00408588	0.0233345	0.375914	11.3298			0.0242072	0.602183	92.6892	71.7838	82.2365	58.689	39.2828	48.9859	0.404329
HandGal4xcona_27_1wf_93003_30s_11071727	0.74	conaxHandGal4	27	11071727	1	f	random	2.87553	2.85633	0.0377006	0.013199				0.347806	0.3501	0.00455181	0.0130015				0.170034	0.1681	0.0041431	0.0246466	0.488877	14.4529				0.177741	0.1751	0.00430826	0.0246045	0.511034	15.2857			0.0130015	1.04532	77.7	72.5351	75.1176	51.8053	41.4664	46.6359	0.379162
HandGal4xcona_28_1wf_93003_30s_11071728	0.74	conaxHandGal4	28	11071728	1	f	random	2.07296	2.06954	0.0404218	0.0195318				0.482582	0.4832	0.00927736	0.0191998				0.314289	0.3151	0.00928215	0.0294578	0.651265	19.1716				0.168289	0.1681	0.00125862	0.00748734	0.348725	10.4339			0.0191998	0.535459	86.8358		86.8358	51.1939		51.1939	0.410452
HandGal4xDek-KK_01_1wf_93003_30s_1110171	0.74	DekxHandGal4	1	1110171	1	f	random	1.30479	1.26104	0.179381	0.142249				0.776439	0.7931	0.0786891	0.0992171				0.59046	0.6105	0.079443	0.130128	0.760472	22.4375				0.185979	0.182501	0.00544211	0.0298196	0.239528	7.0672			0.0992171	0.314973	132.512	97.7052	115.108	91.0681	58.4647	74.7664	0.35047
HandGal4xDek-KK_02_1wf_93003_30s_1110172	0.74	DekxHandGal4	2	1110172	1	f	random	1.40584	1.34427	0.276298	0.205538				0.727265	0.743999	0.0864981	0.116261				0.49619	0.5193	0.0875115	0.168518	0.682269	19.8476				0.230917	0.2316	0.00863187	0.0372706	0.317514	9.4676			0.116261	0.46538	89.4145	83.6331	86.5238	55.228	50.5859	52.907	0.388527
HandGal4xDek-KK_03_1wf_93003_30s_1110173	0.74	DekxHandGal4	3	1110173	1	f	random	2.15891	2.15889	0.0826082	0.0382643				0.463862	0.4632	0.0174569	0.0376876				0.270205	0.2737	0.0170974	0.0624678	0.58251	17.2931				0.193594	0.1965	0.00451625	0.0229835	0.417352	12.5836			0.0376876	0.716472	80.7448	79.9508	80.3478	44.0595	36.0859	40.0727	0.501259
HandGal4xDek-KK_04_1wf_93003_30s_1110174	0.74	DekxHandGal4	4	1110174	1	f	random	3.91368	3.95725	0.0827707	0.0209162				0.255597	0.252701	0.00544525	0.0215482				0.110504	0.112299	0.00501039	0.0446165	0.432339	13.0395				0.145108	0.1474	0.00400897	0.0271979	0.567722	16.9776			0.0215482	1.31314	92.5473	79.8549	86.2011	60.7927	44.7011	52.7469	0.388095
HandGal4xDek-KK_05_1wf_93003_30s_1110175	0.74	DekxHandGal4	5	1110175	1	f	random	1.92539	1.92567	0.0778282	0.0404162				0.520229	0.5193	0.0210763	0.0405859				0.341063	0.3299	0.0300302	0.0910282	0.655602	19.4406				0.179642	0.1895	0.0210374	0.111015	0.345314	10.2396			0.0405859	0.526712	97.7809	87.2855	92.5332	60.698	54.5647	57.6313	0.377182
HandGal4xDek-KK_06_1wf_93003_30s_1110176	0.74	DekxHandGal4	6	1110176	1	f	random	1.63694	1.61917	0.0821962	0.0507643				0.612342	0.6176	0.0300605	0.048673				0.44581	0.4492	0.0297414	0.0662097	0.728042	21.3989				0.166427	0.1684	0.00373041	0.0221521	0.271787	8.1549			0.048673	0.373312	104.343	89.5889	96.9658	71.841	45.9039	58.8724	0.392853
HandGal4xDek-KK_07_1wf_93003_30s_1110177	0.74	DekxHandGal4	7	1110177	1	f	random	1.78549	1.78126	0.0579996	0.0325611				0.560664	0.561499	0.0183462	0.0326736				0.377655	0.379	0.0185075	0.0488326	0.673585	20.0157				0.183009	0.1825	0.0101966	0.0558719	0.326415	9.69949			0.0326736	0.484594	101.512	87.4892	94.5007	63.6787	54.8699	59.2743	0.372763
HandGal4xDek-KK_08_1wf_93003_30s_1110178	0.74	DekxHandGal4	8	1110178	1	f	random	1.58379	1.58303	0.0529219	0.0334307				0.632091	0.631701	0.0206973	0.0327643				0.418562	0.4211	0.0204387	0.0485366	0.662185	19.6724				0.21353	0.2106	0.00453745	0.0215453	0.337815	10.0359			0.0327643	0.510151	88.1097	70.3273	79.2185	51.2527	35.7964	43.5246	0.450576
HandGal4xDek-KK_09_1wf_93003_30s_1110179	0.74	DekxHandGal4	9	1110179	1	f	random	1.26501	1.25	0.121813	0.0974503				0.797043	0.8001	0.0691912	0.0864781				0.576257	0.5755	0.0687666	0.11949	0.722993	21.3215				0.220787	0.217602	0.00804803	0.0369851	0.277007	8.1691			0.0864781	0.383139	80.877	70.3623	75.6196	53.4083	39.2828	46.3455	0.387123
HandGal4xDek-KK_10_1wf_93003_30s_11101710	0.74	DekxHandGal4	10	11101710	1	f	random	1.63856	1.65672	0.11077	0.0668609				0.613073	0.610498	0.0419013	0.0686345				0.444873	0.442099	0.0411074	0.0929825	0.725645	21.7988				0.166718	0.1684	0.00446604	0.0265205	0.271939	8.1692			0.0686345	0.374755	89.5522	85.1032	87.3277	67.3563	56.2449	61.8006	0.292314
HandGal4xDek-KK_11_1wf_93003_30s_11101711	0.74	DekxHandGal4	11	11101711	1	f	random	2.77027	2.73973	0.261836	0.09557				0.363921	0.365	0.0327771	0.0898003				0.213462	0.2176	0.0252813	0.116182	0.586562	17.5039				0.150459	0.1474	0.0205078	0.13913	0.413438	12.3376			0.0898003	0.704848	108.346	96.1915	102.269	71.5048	56.4587	63.9817	0.374377
HandGal4xDek-KK_12_1wf_93003_30s_11101712	0.74	DekxHandGal4	12	11101712	1	f	random	3.7635	3.74953	0.0765117	0.0204057				0.265817	0.2667	0.00538645	0.0201967				0.112851	0.1123	0.00506553	0.0451072	0.424545	12.7522				0.15296	0.1544	0.00332251	0.0215189	0.575433	17.1315			0.0201967	1.35541	101.768	79.18	90.4741	64.0688	42.1865	53.1276	0.412786
HandGal4xDek-KK_13_1wf_93003_30s_11101713	0.74	DekxHandGal4	13	11101713	1	f	random	2.48502	2.49937	0.0464772	0.0185955				0.40254	0.4001	0.00758804	0.0189654				0.234358	0.231601	0.0076023	0.032825	0.582199	17.3425				0.168338	0.1684	0.00216691	0.0128677	0.418189	12.457			0.0189654	0.718294	90.5253	63.6787	77.102	57.1	38.5085	47.8042	0.379987
HandGal4xDek-KK_14_1wf_93003_30s_11101714	0.74	DekxHandGal4	14	11101714	1	f	random	1.33056	1.34409	0.0461619	0.0343444				0.752392	0.744	0.026312	0.0353655				0.587736	0.5825	0.0249542	0.0428398	0.781156	22.9217				0.164575	0.1615	0.0053775	0.0332972	0.218736	6.583			0.0353655	0.280015	80.6634	75.3566	78.01	50.3689	41.2413	45.8051	0.41283
HandGal4xDek-KK_15_1wf_93003_30s_11101715	0.74	DekxHandGal4	15	11101715	1	f	random	1.43555	1.42491	0.0850117	0.0596612				0.698983	0.7018	0.040825	0.0581718				0.516498	0.5193	0.0407669	0.0785035	0.738927	21.6929				0.182486	0.1825	0.00301428	0.0165166	0.261073	7.8469			0.0581718	0.353314	108.124	112.153	110.138	74.9193	64.448	69.6836	0.367309
HandGal4xDek-KK_16_1wf_93003_30s_11101716	0.74	DekxHandGal4	16	11101716	1	f	random	2.7186	2.73973	0.277315	0.10122				0.372493	0.365	0.047743	0.130803				0.205869	0.196501	0.0473672	0.241053	0.55268	16.6754				0.166156	0.1684	0.00616544	0.0366119	0.446066	13.2925			0.130803	0.807096	80.6736	71.78	76.2268	48.8624	38.5085	43.6854	0.426902
HandGal4xDek-KK_17_1wf_93003_30s_11101717	0.74	DekxHandGal4	17	11101717	1	f	random	1.00538	0.989512	0.0685318	0.0692582				0.99901	1.0106	0.0669939	0.0662913				0.7685	0.779	0.0641036	0.0822896	0.769261	23.055				0.232565	0.2316	0.00735979	0.0317781	0.232796	6.7444			0.0662913	0.302623	91.7152	91.8674	91.7913	58.7403	48.98	53.8601	0.413233
HandGal4xDek-KK_18_1wf_93003_30s_11101718	0.74	DekxHandGal4	18	11101718	1	f	random	1.76286	1.63773	0.424668	0.259302				0.587146	0.6106	0.0920088	0.150686				0.406926	0.4282	0.0912161	0.213022	0.693058	20.3463				0.180265	0.1824	0.00412622	0.0226218	0.307018	9.1935			0.150686	0.442991	84.4768	76.4496	80.4632	51.8475	35.7122	43.7799	0.455902
HandGal4xDek-KK_19_1wf_93003_30s_11101719	0.74	DekxHandGal4	19	11101719	1	f	random	1.70091	1.69607	0.0493898	0.0291202				0.58841	0.5896	0.0169577	0.0287614				0.372373	0.3789	0.0183035	0.0483069	0.632845	18.991				0.215748	0.2175	0.00720164	0.033111	0.366663	10.7874			0.0287614	0.579387	94.7316	95.46	95.0958	58.4787	51.0814	54.7801	0.423948
HandGal4xDek-KK_20_1wf_93003_30s_11101720	0.74	DekxHandGal4	20	11101720	1	f	random	1.95038	1.51584	0.919365	0.606506				0.591253	0.6597	0.20938	0.317386				0.399054	0.505301	0.230253	0.455675	0.674929	19.9527				0.195812	0.189499	0.0466068	0.245948	0.331181	9.7906			0.317386	0.49069	83.6233	87.3984	85.5108	54.0251	47.0933	50.5592	0.408739
HandGal4xDek-KK_21_1wf_93003_30s_11101721	0.74	DekxHandGal4	21	11101721	1	f	random	2.68254	2.68816	0.0690903	0.0257017				0.37302	0.372001	0.0093514	0.0251381				0.199374	0.2035	0.0103343	0.0507826	0.534487	16.1493				0.173522	0.1754	0.00365224	0.0208224	0.465183	13.8818			0.0251381	0.870335	100.651	77.7141	89.1825	68.8836	46.831	57.8573	0.351248
HandGal4xDek-KK_22_1wf_93003_30s_11101722	0.74	DekxHandGal4	22	11101722	1	f	random	1.99011	1.8997	0.337947	0.177895				0.512333	0.5264	0.0633106	0.120271				0.332269	0.3439	0.0593283	0.172516	0.648541	19.2716				0.179941	0.1755	0.0102813	0.0585828	0.351219	10.4366			0.120271	0.541553	99.9247	80.6905	90.3076	66.7027		66.7027	0.261383
HandGal4xDek-KK_23_1wf_93003_30s_11101723	0.74	DekxHandGal4	23	11101723	1	f	random	1.48804	1.49992	0.122292	0.0815319				0.676782	0.6668	0.0604543	0.0906633				0.469575	0.4702	0.0428519	0.0911355	0.693835	20.6613				0.207127	0.203501	0.03155	0.155036	0.306047	9.3207			0.0906633	0.441094	76.992	77.9252	77.4586	51.8	47.826	49.813	0.356908
HandGal4xDek-KK_24_1wf_93003_30s_11101724	0.74	DekxHandGal4	24	11101724	1	f	random	1.19046	1.17758	0.0608594	0.0516817				0.841989	0.849199	0.0402573	0.0474062				0.645874	0.6527	0.0400432	0.0613501	0.767082	22.6056				0.196125	0.1965	0.00165048	0.00839941	0.232931	7.0605			0.0474062	0.303658	111.779	86.9618	99.3705	70.3	48.2421	59.271	0.403535
HandGal4xDek-KK_25_1wf_93003_30s_11101725	0.74	DekxHandGal4	25	11101725	1	f	random	1.41808	1.38332	0.394329	0.285061				0.737443	0.7229	0.133202	0.18426				0.560757	0.5544	0.132538	0.239065	0.760408	22.4303				0.176824	0.1755	0.00773049	0.0440484	0.239781	7.2498			0.18426	0.315331	101.553	85.2575	93.4051	60.6845	51.1939	55.9392	0.401112
HandGal4xDek-KK_26_1wf_93003_30s_11101726	0.74	DekxHandGal4	26	11101726	1	f	random	2.01091	1.97902	0.187469	0.0947283				0.501032	0.505301	0.0413907	0.081913				0.334376	0.3439	0.0424879	0.123547	0.667375	19.7282				0.166568	0.1684	0.00992091	0.0589128	0.33245	9.9941			0.081913	0.498146	75.6105	62.9044	69.2574	45.1946	42.2837	43.7391	0.368455
HandGal4xDek-KK_27_1wf_93003_30s_11101727	0.74	DekxHandGal4	27	11101727	1	f	random	1.74407	1.53233	0.585134	0.381858				0.61161	0.6527	0.134031	0.205348				0.437412	0.4772	0.131097	0.27472	0.715181	21.4332				0.176198	0.168501	0.0175581	0.104202	0.288088	8.4575			0.205348	0.402819	101.835	73.3198	87.5776	70.1245	51.8053	60.9649	0.303876
HandGal4xDek-KK_28_1wf_93003_30s_11101728	0.74	DekxHandGal4	28	11101728	1	f	random	2.41454	2.37473	0.232455	0.0978868				0.417041	0.421099	0.0312649	0.0742461				0.252072	0.2596	0.0301986	0.116327	0.604431	18.1492				0.164977	0.1684	0.00648395	0.0385033	0.395591	11.7134			0.0742461	0.654485	102.863	99.9247	101.394	67.3563	60.0541	63.7052	0.371705
HandGal4xDek-KK_29_1wf_93003_30s_11101729	0.74	DekxHandGal4	29	11101729	1	f	random	1.94589	1.85048	0.417992	0.225883				0.530755	0.5404	0.087654	0.162202				0.329982	0.3438	0.0700976	0.203891	0.621722	18.479				0.200773	0.196499	0.0415166	0.211281	0.378278	11.2433			0.162202	0.608437	96.382	92.3074	94.3447	61.5803	51.2527	56.4165	0.402017
HandGal4xDek-KK_30_1wf_93003_30s_11101730	0.74	DekxHandGal4	30	11101730	1	f	random	1.37474	1.37005	0.115009	0.0839453				0.732705	0.7299	0.0637109	0.0872872				0.583753	0.582601	0.0615097	0.105578	0.796709	23.3501				0.148915	0.1474	0.00361656	0.0245357	0.203239	6.1055			0.0872872	0.255099	95.692	73.4988	84.5954	62.1776	43.0792	52.6284	0.377881
HandGal4xocr3_01_1wf_Orca_30s_111417_1	0.645	Orc3xHandGal4	1	111417	1	f	random	2.37115	2.3753	0.05373	0.0226203				0.421945	0.421	0.00927241	0.0220248				0.267693	0.2666	0.00916739	0.0343863	0.634426	19.0062				0.154252	0.154301	0.00185378	0.0120141	0.365574	10.9519			0.0220248	0.576228	91.7738	89.1244	90.4491	60.8492	54.4901	57.6696	0.362408
HandGal4xocr3_02_1wf_Orca_30s_111417_2	0.645	Orc3xHandGal4	2	111417	1	f	random	2.02809	2.03624	0.0712946	0.0350128				0.493688	0.4911	0.0177542	0.0361518				0.330455	0.3298	0.0171289	0.0519372	0.66936	19.8273				0.163202	0.1614	0.00438853	0.0271904	0.330576	9.9553			0.0361518	0.493869	86.5839	69.0271	77.8055	52.1773	43.8647	48.021	0.382807
HandGal4xocr3_03_1wf_Orca_30s_111417_3	0.645	Orc3xHandGal4	3	111417	1	f	random	3.54315	3.56253	0.0542665	0.0152326				0.282292	0.280699	0.00433179	0.0154322				0.103982	0.1052	0.00401622	0.038177	0.368349	11.0221				0.17831	0.1754	0.00451714	0.0257533	0.631651	18.9009			0.0154322	1.71482	76.3311	84.6155	80.4733	50.3141	49.2908	49.8025	0.38113
HandGal4xocr3_04_1wf_Orca_30s_111417_4	0.645	Orc3xHandGal4	4	111417	1	f	random	2.80901	2.79486	0.0399469	0.014293				0.35606	0.3578	0.00501492	0.014016				0.190848	0.189499	0.00488122	0.0257586	0.535999	16.0312				0.165212	0.168301	0.00466319	0.0277075	0.464001	13.8778			0.014016	0.865674	102.573	86.4324	94.5028	65.8184	53.5389	59.6787	0.368499
HandGal4xocr3_05_1wf_Orca_30s_111417_5	0.645	Orc3xHandGal4	5	111417	1	f	random	2.43225	2.41605	0.0844309	0.0349459				0.411601	0.4139	0.0137281	0.0331676				0.235369	0.238499	0.0146988	0.0616304	0.571836	17.1819				0.176278	0.1754	0.00412962	0.0235441	0.428273	12.692			0.0331676	0.748943	92.9897	83.215	88.1023	61.3971	57.1253	59.2612	0.32736
HandGal4xocr3_06_1wf_Orca_30s_111417_6	0.645	Orc3xHandGal4	6	111417	1	f	random	1.65852	1.65727	0.0731534	0.0441409				0.604086	0.603401	0.0259698	0.0430391				0.406196	0.4069	0.0260791	0.0640921	0.672414	19.9036				0.19789	0.1965	0.00400055	0.0203591	0.327586	9.6966			0.0430391	0.487178	95.6777	86.4228	91.0502	54.9198	48.9903	51.955	0.429381
HandGal4xocr3_07_1wf_Orca_30s_111417_7	0.645	Orc3xHandGal4	7	111417	1	f	random	2.38945	2.33645	0.595511	0.254879				0.447638	0.428	0.126849	0.296376				0.219482	0.217501	0.0818205	0.376185	0.490311	14.7053				0.227757	0.203499	0.0973421	0.478343	0.508797	15.2597			0.296376	1.0377	101.267	90.0347	95.6509	64.5032	55.9107	60.207	0.370555
HandGal4xocr3_08_1wf_Orca_30s_111417_8	0.645	Orc3xHandGal4	8	111417	1	f	random	2.86701	2.85063	0.0518541	0.0181904				0.348898	0.3508	0.00622798	0.0177537				0.187368	0.1894	0.00800966	0.0422897	0.537029	15.9263				0.161528	0.1614	0.00441467	0.0273524	0.462966	13.8914			0.0177537	0.862088	91.5923	75.5339	83.5631	64.5129	48.7221	56.6175	0.322458
HandGal4xocr3_09_1wf_Orca_30s_111417_9	0.645	Orc3xHandGal4	9	111417	1	f	random	2.67231	2.59135	0.288211	0.11122				0.377972	0.3859	0.0375746	0.0973687				0.209686	0.217501	0.0375608	0.172693	0.554766	16.5652				0.1682	0.1684	0.00637755	0.0378715	0.445006	13.456			0.0973687	0.802151	87.0774	85.1424	86.1099	58.7092	48.4137	53.5614	0.377988
HandGal4xocr3_10_1wf_Orca_30s_111417_10	0.645	Orc3xHandGal4	10	111417	1	f	random	1.80952	1.80408	0.0607649	0.033682				0.55322	0.5543	0.0176576	0.0318557				0.361068	0.364799	0.0171509	0.0470146	0.652667	19.4977				0.192152	0.1895	0.00432751	0.0228365	0.347333	10.3762			0.0318557	0.532176	94.1788	88.3744	91.2766	56.793	51.7007	54.2468	0.405688
HandGal4xocr3_11_1wf_Orca_30s_111417_11	0.645	Orc3xHandGal4	11	111417	1	f	random	1.8246	1.82749	0.0469914	0.0257137				0.548434	0.547199	0.0144643	0.0264334				0.377302	0.371901	0.0142696	0.0383694	0.687962	20.3743				0.171111	0.168401	0.00436491	0.0259198	0.312	9.24001			0.0264334	0.453513	87.6109	80.0034	83.8071	61.122	45.9084	53.5152	0.361448
HandGal4xocr3_12_1wf_Orca_30s_111417_12	0.645	Orc3xHandGal4	12	111417	1	f	random	2.0412	2.03624	0.0499952	0.0245527				0.490197	0.4911	0.011844	0.0241173				0.314684	0.315701	0.0113957	0.0360966	0.641954	19.1957				0.175513	0.1754	0.00155244	0.0088509	0.358046	10.7063			0.0241173	0.557745	90.9816	74.8228	82.9022	51.6363	45.4439	48.5401	0.41449
HandGal4xocr3_13_1wf_Orca_30s_111417_13	0.645	Orc3xHandGal4	13	111417	1	f	random	2.21655	2.19298	0.139396	0.0635645				0.452798	0.456	0.026982	0.059171				0.257651	0.2666	0.0304048	0.114047	0.569019	16.7473				0.195274	0.1964	0.00841107	0.0428263	0.431261	12.8881			0.059171	0.757903	90.9473	68.5068	79.727	54.18	38.2023	46.1911	0.420634
HandGal4xocr3_14_1wf_Orca_30s_111417_14	0.645	Orc3xHandGal4	14	111417	1	f	random	3.07837	3.09885	0.097201	0.0313668				0.325174	0.322701	0.0108557	0.0336403				0.160837	0.1614	0.00862836	0.0534595	0.494618	14.797				0.164337	0.1614	0.00597016	0.0369899	0.505382	15.119			0.0336403	1.02176	96.75	100.108	98.429	64.1183	56.7747	60.4465	0.385888
HandGal4xocr3_15_1wf_Orca_30s_111417_15	0.645	Orc3xHandGal4	15	111417	1	f	random	2.42638	2.41605	0.0596721	0.0246983				0.412382	0.4139	0.0101872	0.0246126				0.23604	0.2385	0.0103133	0.0432423	0.572381	17.2309				0.176474	0.1754	0.0032075	0.0182868	0.427937	12.7061			0.0246126	0.747644	75.9294	72.8964	74.4129	50.5986	41.3002	45.9494	0.382508
HandGal4xOrc3-KK_01_1wf_93003_30s_1108171	0.74	Orc3xHandGal4	1	1108171	1	f	random	2.03245	1.82682	0.409311	0.224057				0.505557	0.547401	0.0887473	0.162125				0.282426	0.3229	0.0889662	0.275522	0.558643	16.3807				0.222798	0.2246	0.00871808	0.038816	0.440699	13.1451			0.162125	0.788873	105.083	93.2664	99.1745	60.6845	56.9848	58.8347	0.406756
HandGal4xOrc3-KK_02_1wf_93003_30s_1108172	0.74	Orc3xHandGal4	2	1108172	1	f	random	2.94845	2.96823	0.0562629	0.018955				0.339269	0.336901	0.00651868	0.019349				0.151933	0.1544	0.00794837	0.0514791	0.447824	13.3701				0.187336	0.189499	0.00639656	0.0337551	0.552176	16.4856			0.019349	1.23302	109.582	92.5118	101.047	58.5021	46.6435	52.5728	0.47972
HandGal4xOrc3-KK_03_1wf_93003_30s_1108173	0.74	Orc3xHandGal4	3	1108173	1	f	random	2.24324	2.03583	0.440874	0.216557				0.457283	0.491301	0.0751684	0.152999				0.255029	0.2948	0.0806496	0.273574	0.557706	16.5769				0.203209	0.1966	0.0120104	0.0610906	0.444384	13.2086			0.152999	0.796807	89.5522	89.5889	89.5706	69.5954	46.6728	58.1341	0.350969
HandGal4xOrc3-KK_04_1wf_93003_30s_1108174	0.74	Orc3xHandGal4	4	1108174	1	f	random	2.94066	2.96736	0.0706414	0.0238061				0.340225	0.3438	0.00829447	0.0241259				0.175297	0.175402	0.00579694	0.0330495	0.515237	15.4261				0.164928	0.1684	0.00586898	0.0348515	0.484763	14.5137			0.0241259	0.940853	106.029	93.3838	99.7066	60.9007	54.0656	57.4831	0.423477
HandGal4xOrc3-KK_05_1wf_93003_30s_1108175	0.74	Orc3xHandGal4	5	1108175	1	f	random	1.4408	1.45391	0.0537929	0.0369988				0.694974	0.694799	0.0253333	0.0364613				0.504337	0.498301	0.0265906	0.0533626	0.725692	21.6865				0.191937	0.189501	0.00413403	0.0218154	0.276179	8.2533			0.0364613	0.380573	91.023	80.9345	85.9787	51.8211	43.149	47.4851	0.447711
HandGal4xOrc3-KK_06_1wf_93003_30s_1108176	0.74	Orc3xHandGal4	6	1108176	1	f	random	2.52789	2.54388	0.033911	0.0133304				0.395643	0.393099	0.00532952	0.0135577				0.236185	0.2386	0.00583495	0.024455	0.596966	17.7139				0.159391	0.1614	0.00376385	0.02332	0.402866	12.1137			0.0135577	0.674855	94.746	79.9748	87.3604	54.2678	42.1865	48.2271	0.447952
HandGal4xOrc3-KK_07_1wf_93003_30s_1108177	0.74	Orc3xHandGal4	7	1108177	1	f	random	1.67615	1.67617	0.055484	0.0331017				0.597267	0.5965	0.019983	0.0335004				0.409864	0.4071	0.0195523	0.0480282	0.686232	20.4932				0.18711	0.1895	0.00409884	0.0216298	0.313277	9.3555			0.0335004	0.456517	118.437	89.5675	104.002	71.4244	45.1643	58.2943	0.43949
HandGal4xSin3AKK_01_1wf_93003_30s_1113171	0.74	Sin3AxHandGal4	1	1113171	1	f	random	2.11271	1.95199	0.690414	0.353698				0.557333	0.5123	0.377846	0.737549				0.317473	0.2877	0.347542	1.208	0.569628	16.1911				0.239027	0.2036	0.107316	0.527092	0.428876	12.4294			0.737549	0.752905	130.45	112.677	121.564	87.3325	68.1805	77.7565	0.360363
HandGal4xSin3AKK_02_1wf_93003_30s_1113172	0.74	Sin3AxHandGal4	2	1113172	1	f	random	2.35056	2.54453	0.554425	0.217889				0.46468	0.3931	0.202256	0.514516				0.256528	0.1825	0.204983	1.12319	0.552054	16.4178				0.208152	0.2036	0.00958883	0.0470964	0.447946	13.3217			0.514516	0.811418	141.41	99.3366	120.373	105.103	53.3262	79.2148	0.341923
HandGal4xSin3AKK_03_1wf_93003_30s_1113173	0.74	Sin3AxHandGal4	3	1113173	1	f	random	2.14756	2.15843	0.791024	0.366481				0.5493	0.4702	0.258543	0.549859				0.32898	0.238699	0.255724	1.07133	0.598907	17.7649				0.220271	0.2106	0.04927	0.23395	0.401003	12.1149			0.549859	0.669558	113.242	92.503	102.872	82.9328	52.54	67.7364	0.341549
HandGal4xSin3AKK_04_1wf_93003_30s_1113174	0.74	Sin3AxHandGal4	4	1113174	1	f	random	1.57689	1.56568	0.0435524	0.0278169				0.634609	0.6387	0.0173388	0.0271471				0.442938	0.442201	0.0174043	0.0393584	0.697971	20.8181				0.191457	0.189501	0.00370962	0.0195757	0.301694	8.9985			0.0271471	0.432244	118.421	115.478	116.949	82.8833	65.1578	74.0206	0.367072
HandGal4xSin3AKK_05_1wf_93003_30s_1113175	0.74	Sin3AxHandGal4	5	1113175	1	f	random	1.59865	1.60077	0.0520796	0.0325341				0.626183	0.624701	0.0201687	0.0322855				0.431143	0.4351	0.0199193	0.0457809	0.688525	20.2637				0.195071	0.1965	0.00403825	0.0205509	0.311524	9.3634			0.0322855	0.452451	145.268	127.289	136.278	95.7464	69.5954	82.6709	0.393368
HandGal4xSin3AKK_06_1wf_93003_30s_1113176	0.74	Sin3AxHandGal4	6	1113176	1	f	random	1.17509	1.09589	0.625	0.570312				1.10432	0.9405	0.650635	0.691797				0.65754	0.6598	0.475883	0.721253	0.595425	16.4385				0.49582	0.2246	0.633226	2.81935	0.448982	12.3955			0.691797	0.754053	111.779	99.1848	105.482	66.6	56.2449	61.4224	0.417698
HandGal4xSin3AKK_07_1wf_93003_30s_1113177	0.74	Sin3AxHandGal4	7	1113177	1	f	random	1.74988	1.78063	0.0950738	0.0533935				0.57299	0.5685	0.0300498	0.0528581				0.375781	0.365	0.0309954	0.0849188	0.655824	19.5406				0.19721	0.1966	0.00485424	0.0246909	0.344176	10.2549			0.0528581	0.5248	132.592	122.842	127.717	79.3493	71.2862	75.3177	0.410277
HandGal4xSin3AKK_08_1wf_93003_30s_1113178	0.74	Sin3AxHandGal4	8	1113178	1	f	random	1.44468	1.35685	0.93654	0.69023				1.21633	0.744001	1.14543	1.53955				0.640968	0.287701	1.04595	3.63554	0.526969	16.0242				0.573221	0.4352	0.474141	1.08948	0.471271	13.7573			1.53955	0.894305	126.559	119.253	122.906	99.9247	60.6845	80.3046	0.346618
HandGal4xSin3AKK_09_1wf_93003_30s_1113179	0.74	Sin3AxHandGal4	9	1113179	1	f	random	1.37016	1.37005	0.0506999	0.0370058				0.730853	0.73	0.0273385	0.0374501				0.520108	0.5194	0.0272224	0.0524112	0.711645	20.8043				0.210741	0.2106	0.00244513	0.0116103	0.28835	8.6404			0.0374501	0.405188	120.622	106.624	113.623	68.08	57.952	63.016	0.445395
HandGal4xSin3AKK_10_1wf_93003_30s_11131710	0.74	Sin3AxHandGal4	10	11131710	1	f	random	2.43173	2.59	0.832187	0.321307				0.488682	0.386	0.271952	0.70454				0.282492	0.1824	0.265964	1.45814	0.578069	17.232				0.20619	0.2035	0.027539	0.135326	0.421931	12.5776			0.70454	0.729899	117.718	111.158	114.438	79.18	60.7927	69.9864	0.388434
HandGal4xSin3AKK_11_1wf_93003_30s_11131711	0.74	Sin3AxHandGal4	11	11131711	1	f	random	2.43153	2.49938	0.484724	0.193938				0.437138	0.400101	0.165087	0.412613				0.234583	0.2036	0.161627	0.793845	0.536633	16.1862				0.202099	0.1966	0.0330282	0.167997	0.462322	13.7427			0.412613	0.861524	99.9247	91.0471	95.4859	54.765	52.6701	53.7176	0.437429
HandGal4xSin3AKK_12_1wf_93003_30s_11131712	0.74	Sin3AxHandGal4	12	11131712	1	f	random	1.23067	1.23885	0.0922425	0.0744581				0.817128	0.8072	0.0622887	0.0771663				0.608883	0.603701	0.0569346	0.0943093	0.745151	21.9198				0.208244	0.210499	0.0161877	0.0769015	0.254849	7.4968			0.0771663	0.34201	132.479	109.422	120.951	95.4715	73.8889	84.6802	0.299877
HandGal4xSin3AKK_13_1wf_93003_30s_11131713	0.74	Sin3AxHandGal4	13	11131713	1	f	random	1.62463	1.54846	0.449113	0.290038				0.654638	0.645802	0.152504	0.236146				0.440526	0.4352	0.153032	0.351635	0.672931	20.2642				0.211172	0.217499	0.0113766	0.0523066	0.322578	9.7139			0.236146	0.479363	115.103	108.217	111.66	76.5104	64.1585	70.3344	0.370102
HandGal4xSin3AKK_14_1wf_93003_30s_11131714	0.74	Sin3AxHandGal4	14	11131714	1	f	random	1.64987	1.65673	0.11046	0.0666738				0.608458	0.6036	0.0429829	0.0712109				0.425292	0.4212	0.0416252	0.0988253	0.698966	20.8393				0.183496	0.1825	0.00300976	0.0164919	0.301575	8.9913			0.0712109	0.431459	100.814	96.4842	98.6491	60.1042	72.2401	66.1721	0.329217
HandGal4xSin3AKK_15_1wf_93003_30s_11131715	0.74	Sin3AxHandGal4	15	11131715	1	f	random	1.10903	1.10449	0.0528118	0.0478158				0.903694	0.905401	0.0424762	0.0469143				0.663078	0.6668	0.0446817	0.0670092	0.733742	21.2185				0.240558	0.2387	0.00608285	0.0254833	0.266194	7.9384			0.0469143	0.362789	94.746	87.633	91.1895	62.1776	51.402	56.7898	0.377233
HandGal4xSin3AKK_16_1wf_93003_30s_11131716	0.74	Sin3AxHandGal4	16	11131716	1	f	random	1.74628	1.10436	1.2408	1.12354				0.951865	0.905499	1.21642	1.34337				0.640931	0.2316	1.25968	5.43902	0.673343	20.5098				0.293429	0.2105	0.200217	0.951149	0.308268	9.0963			1.34337	0.457817	106.686	100.651	103.668	74.8315	64.3843	69.6079	0.328552
HandGal4xSin3AKK_17_1wf_93003_30s_11131717	0.74	Sin3AxHandGal4	17	11131717	1	f	random	1.43983	1.43905	0.0455897	0.0316803				0.695205	0.694901	0.021411	0.0308116				0.495735	0.4983	0.0207452	0.0416319	0.713078	21.3166				0.19947	0.1966	0.0049814	0.0253378	0.286922	8.5772			0.0308116	0.402372	103.695	102.337	103.016	76.2523	52.7273	64.4898	0.373983
HandGal4xSin3AKK_18_1wf_93003_30s_11131718	0.74	Sin3AxHandGal4	18	11131718	1	f	random	2.4142	2.33536	0.356828	0.152794				0.422128	0.4282	0.0584535	0.13651				0.229549	0.2456	0.0450431	0.1834	0.543791	16.298				0.192579	0.189499	0.0393045	0.207413	0.456209	13.6731			0.13651	0.838943	107.31	87.32	97.3151	68.9194	57.0232	62.9713	0.352913
HandGal4xSin3AKK_19_1wf_93003_30s_11131719	0.74	Sin3AxHandGal4	19	11131719	1	f	random	1.0631	1.07933	0.140814	0.130464				0.957623	0.954599	0.130268	0.136463				0.735187	0.73	0.129495	0.17739	0.767721	22.7908				0.224377	0.2246	0.00576552	0.0256702	0.234307	6.9557			0.136463	0.305198	121.396	105.096	113.246	76.3098	54.3434	65.3266	0.423144
HandGal4xSin3AKK_20_1wf_93003_30s_11131720	0.74	Sin3AxHandGal4	20	11131720	1	f	random	1.97296	2.03541	0.986734	0.484783				0.721927	0.491301	0.630072	1.28246				0.530881	0.2948	0.628396	2.1316	0.735366	21.7661				0.191176	0.189501	0.0108458	0.0572337	0.264814	8.0294			1.28246	0.360111	111	108.063	109.531	76.22	65.1578	70.6889	0.354624
HandGal4xSin3AKK_21_1wf_93003_30s_11131721	0.74	Sin3AxHandGal4	21	11131721	1	f	random	1.46629	1.43906	0.230957	0.160492				0.713027	0.6949	0.225166	0.324026				0.527283	0.5053	0.224267	0.44383	0.7395	21.6186				0.185667	0.1825	0.00910684	0.0499005	0.260392	7.79799			0.324026	0.352119	116.941	106.016	111.479	82.9328	59.9765	71.4547	0.359029
HandGal4xSin3AKK_22_1wf_93003_30s_11131722	0.74	Sin3AxHandGal4	22	11131722	1	f	random	2.03734	2.00682	0.40897	0.20379				0.510448	0.4983	0.108004	0.216746				0.28681	0.2878	0.0656932	0.22826	0.561879	16.635				0.227463	0.2036	0.0941721	0.462535	0.445614	13.4203			0.216746	0.793077	129.519	96.3024	112.911	88.1377	57.0232	72.5805	0.357187
HandGal4xSin3AKK_23_1wf_93003_30s_11131723	0.74	Sin3AxHandGal4	23	11131723	1	f	random	1.12304	1.09589	0.0990712	0.0904025				0.896088	0.9125	0.0689523	0.0755641				0.686149	0.7019	0.0691	0.098447	0.765716	22.6429				0.209939	0.2106	0.00212118	0.0100721	0.234284	6.928			0.0755641	0.305968	114.786	97.6912	106.239	75.5706	56.2449	65.9078	0.379625
HandGal4xSin3AKK_24_1wf_93003_30s_11131724	0.74	Sin3AxHandGal4	24	11131724	1	f	random	1.23374	1.20729	0.138281	0.114538				0.818011	0.8283	0.0694824	0.0838855				0.614747	0.631701	0.0709426	0.112304	0.751514	22.1309				0.204525	0.2036	0.00309394	0.0151962	0.250027	7.36289			0.0838855	0.332697	109.991	106.583	108.287	71.2901	58.577	64.9335	0.400359
HandGal4xSin3AKK_25_1wf_93003_30s_11131725	0.74	Sin3AxHandGal4	25	11131725	1	f	random	1.49984	1.35704	0.502065	0.369972				0.727517	0.7862	0.211647	0.269203				0.511876	0.5755	0.213417	0.370838	0.703592	20.9869				0.22162	0.2246	0.00726739	0.032357	0.304625	8.8648			0.269203	0.432957	112.036	103.814	107.925	66.1255	51.8845	59.005	0.453277
HandGal4xSin3AKK_26_1wf_93003_30s_11131726	0.74	Sin3AxHandGal4	26	11131726	1	f	random	1.98549	1.89969	0.910827	0.47946				0.726374	0.526401	0.634577	1.2055				0.370238	0.1965	0.529194	2.6931	0.509706	14.8095				0.360087	0.2246	0.402474	1.79196	0.495733	14.4035			1.2055	0.972585	112.541	104.652	108.596	74.0037	60.3089	67.1563	0.381597
HandGal4xSin3AKK_27_1wf_93003_30s_11131727	0.74	Sin3AxHandGal4	27	11131727	1	f	random	1.15012	1.08755	0.260223	0.239275				0.9015	0.9265	0.15299	0.165126				0.708478	0.73	0.153317	0.210024	0.785888	22.6713				0.192915	0.189501	0.00600112	0.031668	0.213994	6.3662			0.165126	0.272295	111.938	119.917	115.927	71.7953	71.1016	71.4484	0.383679
HandGal4xZif_01_1wf_93001_30s_032817,1	1.1627	ZifxHandGal4	1	32817.1	1	f	random	1.3957	1.25818	0.296077	0.235323				0.741148	0.8022	0.146958	0.183194				0.52202	0.579399	0.144705	0.249749	0.70434	20.8808				0.219127	0.222799	0.00619116	0.027788	0.29566	8.76509			0.183194	0.419768	103.709	92.4474	98.0781	62.8288	53.9373	58.383	0.404729
HandGal4xZif_02_1wf_93001_30s_032817,2	1.1627	ZifxHandGal4	2	32817.2	1	f	random	1.71318	1.70416	0.0395584	0.0232128				0.584004	0.5868	0.0133987	0.0228336				0.398796	0.4011	0.0129905	0.0323871	0.682866	20.3386				0.184827	0.185699	0.00442621	0.0238353	0.316483	9.42619			0.0228336	0.463463	87.9742	83.9241	85.9491	57.079	51.3698	54.2244	0.369111
HandGal4xZif_04_1wf_93001_30s_032817,4	1.1627	ZifxHandGal4	4	32817.4	1	f	random	1.44383	1.43225	0.0535512	0.0373895				0.693474	0.6982	0.0245426	0.0351513				0.492219	0.4977	0.0246669	0.0495618	0.709788	20.6732				0.20124	0.2006	0.00225812	0.0112568	0.290191	8.6533			0.0351513	0.408841	95.5963	101.182	98.389	63.9591	73.3331	68.6461	0.302299
HandGal4xZif_05_1wf_93001_30s_032817,5	1.1627	ZifxHandGal4	5	32817.5	1	f	random	1.5203	1.52975	0.0339663	0.0222038				0.65807	0.661098	0.0145036	0.0219387				0.487395	0.482901	0.0143604	0.0297379	0.740643	21.4454				0.170678	0.170801	0.00293058	0.0171579	0.259361	7.6805			0.0219387	0.350184	93.7399	98.0053	95.8726	57.3978	66.3554	61.8766	0.354595
HandGal4xZif_06_1wf_93001_30s_032817,6	1.1627	ZifxHandGal4	6	32817.6	1	f	random	0.979587	0.796559	0.553607	0.694998				1.52671	1.2554	1.12394	0.895287				1.45511	1.0994	1.26783	1.1532	0.953098	26.1919				0.215412	0.215399	0.00842856	0.03913	0.141095	3.662			0.895287	0.148039	98.9389	73.3976	86.1682	60.5051	45.4049	52.955	0.385446
HandGal4xZif_07_1wf_93001_30s_032817,7	1.1627	ZifxHandGal4	7	32817.7	1	f	random	1.35393	1.18078	0.557381	0.472046				0.896785	0.846901	0.47173	0.557007				0.723915	0.690901	0.467054	0.676008	0.807234	23.8892				0.17287	0.1709	0.00992679	0.0580854	0.192766	5.7047			0.557007	0.238798	84.0046	79.0978	81.5512	50.333	48.8472	49.5901	0.391914
HandGal4xZif_08_1wf_93001_30s_032817,8	1.1627	ZifxHandGal4	8	32817.8	1	f	random	1.68262	1.68293	0.0428592	0.025467				0.5947	0.5942	0.0153356	0.0258088				0.391462	0.3863	0.015958	0.0413097	0.658251	19.5731				0.203238	0.200601	0.00443326	0.0220999	0.341749	10.1619			0.0258088	0.519177	90.6981	117.484	104.091	61.7217	67.4466	64.5842	0.379543
HandGal4xZif_09_1wf_93001_30s_032817,9	1.1627	ZifxHandGal4	9	32817.9	1	f	random	1.59951	1.60256	0.0381573	0.0238102				0.625547	0.624001	0.0150135	0.02406				0.426264	0.423401	0.015474	0.0365468	0.681426	20.0344				0.199156	0.2005	0.00319076	0.015914	0.318372	9.5595			0.02406	0.467214	105.812	103.715	104.764	68.7568	66.2739	67.5153	0.355546
HandGal4xZif_01_1wf_93001_30s_041217,1	1.1627	ZifxHandGal4	1	41217.1	1	f	random	1.4849	1.42086	0.291049	0.20484				0.686343	0.7038	0.0718367	0.10207				0.498386	0.5152	0.0729586	0.141612	0.726147	20.9322				0.187805	0.188601	0.00957244	0.0507551	0.273631	8.0756			0.10207	0.376826	93.0814		93.0814	65.1216		65.1216	0.30038
HandGal4xZif_02_1wf_93001_30s_041217,2	1.1627	ZifxHandGal4	2	41217.2	1	f	random	1.23974	1.24162	0.0194644	0.0156766				0.806817	0.805399	0.012794	0.0158853				0.625178	0.624	0.0129032	0.0206781	0.774869	22.5064				0.181397	0.1814	0.00244276	0.0134661	0.224831	6.3489			0.0158853	0.290153	94.6369	96.9513	95.7941	64.4643	65.2771	64.8707	0.322811
HandGal4xZif_03_1wf_93001_30s_041217,3	1.1627	ZifxHandGal4	3	41217.3	1	f	random	0.981688	0.805996	0.586562	0.727748				1.35259	1.2407	0.707215	0.570012				1.26646	1.1101	0.805386	0.725508	0.936326	25.3293				0.17703	0.174101	0.0123638	0.0710154	0.130882	3.5406			0.570012	0.139783	105.965	112.932	109.448	66.2739	61.7217	63.9978	0.41527
HandGal4xZif_04_1wf_93001_30s_041217,4	1.1627	ZifxHandGal4	4	41217.4	1	f	random	1.37047	1.36463	0.0437543	0.0320631				0.730395	0.7328	0.0229073	0.0312599				0.541959	0.544201	0.021865	0.0401781	0.742008	21.1364				0.18826	0.1814	0.0117743	0.0649079	0.257751	7.5304			0.0312599	0.34737	113.075	96.0477	104.561	72.4242	60.4269	66.4255	0.364723
HandGal4xzif_01_1wf_93001_30s_051617,1	1.1627	ZifxHandGal4	1	51617.1	1	f	random	1.15993	1.15354	0.0297499	0.0257902				0.862652	0.8669	0.0215964	0.0249122				0.606412	0.6098	0.0219854	0.0360534	0.702963	20.0116				0.25605	0.2571	0.00331283	0.0128854	0.296817	8.7057			0.0249122	0.422238	72.5174	103.995	88.2562	53.0273	73.6275	63.3274	0.28246
HandGal4xzif_02_1wf_93001_30s_051617,2	1.1627	ZifxHandGal4	2	51617.2	1	f	random	1.87788	1.86498	0.0355679	0.0190715				0.532685	0.5362	0.0101236	0.0188803				0.318835	0.315901	0.00885973	0.0280459	0.598542	17.5359				0.213851	0.213099	0.00341862	0.0160424	0.401458	11.7618			0.0188803	0.670726	112.8	123.843	118.321	65.2771	66.9538	66.1154	0.441221
HandGal4xZif_01_1wf_Orca_30s_111417_1	0.645	ZifxHandGal4	1	111417	1	f	random	1.46887	1.45455	0.103377	0.0710716				0.683812	0.6875	0.0438853	0.0638332				0.448519	0.449001	0.0450419	0.100316	0.65591	19.2863				0.235207	0.231602	0.00545651	0.0235599	0.343964	10.3491			0.0638332	0.524408	80.6895	68.3822	74.5358	58.05	49.7027	53.8763	0.277175
HandGal4xZif_02_1wf_Orca_30s_111417_2	0.645	ZifxHandGal4	2	111417	1	f	random	2.10948	2.096	0.144499	0.0689404				0.475726	0.4771	0.0250175	0.0524365				0.293549	0.2947	0.0238174	0.0808191	0.617056	18.4936				0.182421	0.1824	0.00469323	0.0257305	0.383457	11.4925			0.0524365	0.621431	114.181	93.0232	103.602	85.1498	54.8857	70.0177	0.324168
HandGal4xZif_03_1wf_Orca_30s_111417_3	0.645	ZifxHandGal4	3	111417	1	f	random	1.35756	1.3574	0.0529302	0.0389937				0.737725	0.7437	0.0290467	0.039057				0.542343	0.5403	0.029001	0.0536757	0.735156	21.6937				0.19541	0.1964	0.00308704	0.0157182	0.264881	8.0118			0.039057	0.360307	115.673	112.26	113.966	85.384	71.6211	78.5026	0.311177
HandGal4xZif_04_1wf_Orca_30s_111417_4	0.645	ZifxHandGal4	4	111417	1	f	random	1.62991	1.65727	0.154213	0.0930523				0.620387	0.6034	0.0769401	0.127511				0.444198	0.428	0.0769787	0.179857	0.716001	21.3215				0.17876	0.175401	0.00526075	0.0299928	0.288143	8.5805			0.127511	0.402434	83.4546	79.4005	81.4276	52.6416	52.9529	52.7973	0.351605
HandGal4xZif-KK_01_1wf_93003_30s_1108171	0.74	ZifxHandGal4	1	1108171	1	f	random	1.65082	1.61917	0.540542	0.333838				0.686708	0.6176	0.281366	0.45558				0.420556	0.3509	0.284112	0.809667	0.612424	16.4017				0.265637	0.2666	0.0195377	0.073285	0.386828	10.6255			0.45558	0.631633	112.446	106.401	109.423	73.4988	65.3257	69.4123	0.365654
HandGal4xZif-KK_02_1wf_93003_30s_1108172	0.74	ZifxHandGal4	2	1108172	1	f	random	1.95903	1.9516	0.140512	0.0719982				0.512697	0.519299	0.0323405	0.0622773				0.324422	0.329899	0.031235	0.0946805	0.632777	18.8165				0.188274	0.1895	0.00488356	0.0257708	0.367223	10.9199			0.0622773	0.580337	92.6892		92.6892	63.7475		63.7475	0.312245
HandGal4xZif-KK_03_1wf_93003_30s_1108173	0.74	ZifxHandGal4	3	1108173	1	f	random	2.42008	2.41488	0.0513462	0.0212625				0.413394	0.414001	0.00886493	0.0214128				0.21506	0.2106	0.00951552	0.0451829	0.52023	15.6994				0.198564	0.196501	0.00380856	0.0193819	0.480326	14.2966			0.0214128	0.923295	114.721	112.153	113.437	74.7986	65.9265	70.3625	0.379724
HandGal4xZif-KK_04_1wf_93003_30s_1108174	0.74	ZifxHandGal4	4	1108174	1	f	random	1.87727	1.87476	0.0552385	0.0294643				0.533131	0.533401	0.0150811	0.0282734				0.323229	0.3298	0.016088	0.0487811	0.606284	18.1008				0.209655	0.2105	0.00362354	0.017214	0.393253	11.7407			0.0282734	0.648629	113.143	85.8687	99.5056	85.19	53.3006	69.2453	0.304107
HandGal4xZif-KK_05_1wf_93003_30s_1108175	0.74	ZifxHandGal4	5	1108175	1	f	random	2.80861	2.84981	0.369864	0.129786				0.365122	0.350901	0.0748496	0.213307				0.177949	0.182499	0.0189692	0.103942	0.487368	14.5918				0.187316	0.1685	0.0713288	0.423317	0.513023	15.1726			0.213307	1.05264	107.425	96.2455	101.835	62.9696	51.9899	57.4798	0.435561
[truncated: 36 more columns]

[truncated: 18 more sheets: data_random_04_30_18, data_random_04_17_18, data_positive_01_22_19, data_positive_12_14_18, data_positive_28_11_17, data_positive_05_15_19, data_positive_11_21_18, data_positive_09_20_18, data_poitive_04_24_18, data_positive_04_17_18, data_positive_04_09_18, data_positive_03_30_18, data_positive_05_02_18, data_positive_02_17, data_positive_04_17, lines-Info_TF, TF_figS5, Poxm_sr]
