# Supplementary material for: Genetic architecture of natural variation of cardiac performance from flies to humans
Source: eLife. 2022 Nov 16;11:e82459. doi: 10.7554/eLife.82459 (PMC9668334; doi:10.7554/eLife.82459)
Supplement: Figure 4—source data 1. — Sheets ‘phenotypes_CVe’: Variants among the 100 best ranked associations for each cardiac trait, with information about the associated genes and the number of Drosophila Genetic Reference Panel (DGRP) lines in which they are present. Variants among the 100 best ranked associations for each cardiac trait that are not within gene mapping criteria (>1 kb from transcription start site [TSS] and transcription end sites [TES]) are shown below. sheets ‘FastEpistasis_CVe_...’: All FastEpistasis data (on traits CVe), per phenotypes. SNPs ID, position, associated genes, and statistics are indicated for both focal SNPs (left) and their interacting SNPs (right). Each sheet displays the results for indicated quantitative traits, except for the first one which is a merge of all quantitative traits association analyses. [file elife-82459-fig4-data1.xlsx]

## Sheet: read me
Dataset S7
sheets 'phenotypes_CVe_...' : Variants identified by FastLMM as associated to indicated phenotypic variance (CVe). Among 100 best ranked associations, only variants with MAF>4% were retained. Tables for variants mapped to genes. Variants unmapped to genes are shown bellow.
sheets 'FastEpistasis_CVe_...' : Variants identified by FastEpistasis for the corresponding trait variance. SNPs ID, position, associated genes and statistics are indicated for both focal SNPs ("1" - left) and their interacting SNPs ("2"- right). Each sheet displays the results for indicated quantitative trait, except for the first one which is a merge of all quantitative traits association analy…

## Sheet: phenotype_Cve_DI
ID	FlybaseID	GeneSymbol	Position	Type	NbOfLinesForMutationInGWAS	NbOfLinesForMutationInDB	TotalNbOfLinesinDB	sid_index	SNP	Chr	GenDist	ChrPos	PValue	SnpWeight	SnpWeightSE	SnpFractVarExpl	Mixing	Nullh2
2L_6331010_SNP	FBgn0021873	Gef26	0	INTRON	88	112	205	309782	2L_6331010_SNP	1	0	6331010	3.53665519026277e-05	-0.0366010691038228	0.008572630851461	0.335208947237186	0	0.0699418198126306
2L_9327133_SNP	FBgn0032109	CG17005	611	UPSTREAM	41	48	205	468787	2L_9327133_SNP	1	0	9327133	2.16404347144123e-05	0.0375197547943868	0.00854307976941224	0.343691005718288	0	0.0699418198126306
2R_11976066_SNP	FBgn0034072	Dg	0	INTRON	85	109	205	408753	2R_11976066_SNP	2	0	11976066	2.57603286436904e-05	0.0365681331790736	0.00840896535499151	0.340709839679448	0	0
2R_19197072_SNP	FBgn0034842	Prosbeta5R	0	INTRON	107	137	205	762421	2R_19197072_SNP	2	0	19197072	2.80659574881788e-05	-0.0383538321329286	0.00886304204157371	0.339232210898894	0	0
2R_19564744_SNP	FBgn0034886	Pde8	0	INTRON	44	52	205	779228	2R_19564744_SNP	2	0	19564744	5.6996934253895e-06	-0.0387928050996596	0.00823102132144378	0.365565990662265	0	0
2R_19626981_SNP	FBgn0000562	egl	0	INTRON	62	79	205	782000	2R_19626981_SNP	2	0	19626981	1.22343963024651e-05	-0.038302761120333	0.00845351228771738	0.353240541718176	0	0
2R_19626997_SNP	FBgn0000562	egl	0	INTRON	62	81	205	782004	2R_19626997_SNP	2	0	19626997	2.53384552866138e-05	-0.036924585473705	0.0084829381526978	0.340993615663897	0	0
2R_4326894_SNP	FBgn0033292	Cyp4ad1	6	DOWNSTREAM	57	72	205	95858	2R_4326894_SNP	2	0	4326894	1.83683056808509e-05	0.038896712898751	0.00877606969256423	0.346467936669341	0	0
2R_4326894_SNP	FBgn0002535	Lcp4	894	DOWNSTREAM	57	72	205	95858	2R_4326894_SNP	2	0	4326894	1.83683056808509e-05	0.038896712898751	0.00877606969256423	0.346467936669341	0	0
2R_6272023_SNP	FBgn0261698	CG42732	0	INTRON	27	36	205	156954	2R_6272023_SNP	2	0	6272023	5.00707750619147e-06	-0.0392437131198301	0.00827331076777309	0.367606941580933	0	0
2R_8954142_SNP	FBgn0033791	Drl-2	0	INTRON	32	41	205	273398	2R_8954142_SNP	2	0	8954142	6.31227372926552e-06	-0.046749655336219	0.00997018113844122	0.363947999602917	0	0
2R_8954146_SNP	FBgn0033791	Drl-2	0	INTRON	33	41	205	273399	2R_8954146_SNP	2	0	8954146	2.30677934395403e-06	-0.0474070750402583	0.00963022762963668	0.379533904830144	0	0
2R_8954279_SNP	FBgn0033791	Drl-2	0	INTRON	47	59	205	273405	2R_8954279_SNP	2	0	8954279	1.29647712281438e-05	-0.046585081992024	0.0103133432118651	0.352283641932218	0	0
2R_9909365_DEL	FBgn0002643	mam	0	INTRON	52	68	205	319610	2R_9909365_DEL	2	0	9909365	2.41294696980628e-05	-0.0362455499497569	0.0083038196187881	0.341832193914336	0	0
3L_10124451_SNP	FBgn0040823	dpr6	0	INTRON	78	102	205	487251	3L_10124451_SNP	3	0	10124451	1.29391191207666e-05	-0.0370887769498187	0.00821011131525167	0.352316377720428	0	0.362515966012895
3L_11196878_SNP	FBgn0036147	Plod	0	INTRON	23	31	205	551779	3L_11196878_SNP	3	0	11196878	1.61281265482306e-05	0.0373665263200488	0.00837076340090987	0.348652525654678	0	0.362515966012895
3L_11196879_SNP	FBgn0036147	Plod	0	INTRON	24	32	205	551780	3L_11196879_SNP	3	0	11196879	2.33911877531472e-05	0.0365153501189411	0.00835091636527713	0.342363954694972	0	0.362515966012895
3L_18984116_SNP	FBgn0036837	CG18135	0	NON_SYNONYMOUS_CODING	26	32	205	898257	3L_18984116_SNP	3	0	18984116	3.49752779581268e-05	-0.0353294900624877	0.00826938770029503	0.335403814526698	0	0.362515966012895
3L_19147534_SNP	FBgn0016797	fz2	0	INTRON	79	103	205	903723	3L_19147534_SNP	3	0	19147534	1.97616401615265e-05	-0.037789220688357	0.00856085235293412	0.345232669719474	0	0.362515966012895
3L_22284679_SNP	FBgn0027086	Aats-ile	0	NON_SYNONYMOUS_CODING	141	175	205	968236	3L_22284679_SNP	3	0	22284679	2.50401907684779e-05	0.0355827138152219	0.00816914816447166	0.341196941326559	0	0.362515966012895
3L_7172451_SNP	FBgn0265296	Dscam2	0	INTRON	51	70	205	344133	3L_7172451_SNP	3	0	7172451	3.67047749975011e-05	0.0384603688368212	0.00902787261850898	0.334557444179021	0	0.362515966012895
3L_9949074_SNP	FBgn0085385	CG34356	0	INTRON	43	48	205	477929	3L_9949074_SNP	3	0	9949074	2.39922521783281e-05	-0.0367765893535138	0.00842275523229236	0.341929857718435	0	0.362515966012895
3R_12596795_SNP	FBgn0020556	bxd	0	INTRON	43	63	205	339740	3R_12596795_SNP	4	0	12596795	2.94512677523144e-05	-0.0369256121248515	0.00855675529101503	0.338398415301694	0	0.478477741809294
3R_13114146_SNP	FBgn0263501	CR43490	0	EXON	6	9	205	359674	3R_13114146_SNP	4	0	13114146	3.55166990521694e-05	-0.0345712355230869	0.00809922797379753	0.335134706431516	0	0.478477741809294
3R_15180964_SNP	FBgn0262839	CG43203	358	DOWNSTREAM	45	61	205	458342	3R_15180964_SNP	4	0	15180964	2.64765411445897e-05	0.0391571238353698	0.00901843997147067	0.340237941493113	0	0.478477741809294
3R_16112894_SNP	FBgn0262582	cic	0	INTRON	86	111	205	494540	3R_16112894_SNP	4	0	16112894	1.86162568532946e-05	0.0416894577249751	0.00941316395345235	0.346241793143918	0	0.478477741809294
3R_16838434_SNP	FBgn0013995	Calx	0	INTRON	33	44	205	521832	3R_16838434_SNP	4	0	16838434	1.42935759761103e-05	-0.0385086280995326	0.00857019450936849	0.350666366954478	0	0.478477741809294
3R_16838459_SNP	FBgn0013995	Calx	0	INTRON	32	43	205	521834	3R_16838459_SNP	4	0	16838459	1.22693037436131e-05	-0.0386500144529007	0.00853144740457598	0.353193595207145	0	0.478477741809294
3R_16838581_SNP	FBgn0013995	Calx	0	INTRON	37	49	205	521837	3R_16838581_SNP	4	0	16838581	5.41090586056076e-06	-0.0404562041034336	0.00856176038158769	0.366386752459268	0	0.478477741809294
3R_16838601_SNP	FBgn0013995	Calx	0	INTRON	35	47	205	521839	3R_16838601_SNP	4	0	16838601	9.59261952664124e-06	-0.0394751692978741	0.00860124104292973	0.357221559650401	0	0.478477741809294
3R_17383040_SNP	FBgn0002941	slou	136	UPSTREAM	11	13	205	544563	3R_17383040_SNP	4	0	17383040	2.00895750451276e-05	-0.0351945581212861	0.00798036677706206	0.344953894005797	0	0.478477741809294
3R_18178677_SNP	FBgn0038946	rdhB	0	INTRON	55	64	205	577943	3R_18178677_SNP	4	0	18178677	1.37380461206402e-05	0.042767154272667	0.00949760869123979	0.351324479443061	0	0.478477741809294
3R_19182085_SNP	FBgn0024509	sec13	200	UPSTREAM	30	37	205	623877	3R_19182085_SNP	4	0	19182085	1.02386845279293e-05	-0.0390600528518807	0.00853985955159017	0.356160109088191	0	0.478477741809294
3R_19182085_SNP	FBgn0016119	ATPsyn-Cf6	299	UPSTREAM	30	37	205	623877	3R_19182085_SNP	4	0	19182085	1.02386845279293e-05	-0.0390600528518807	0.00853985955159017	0.356160109088191	0	0.478477741809294
3R_19382984_SNP	FBgn0039089	beat-IV	150	UPSTREAM	20	21	205	632003	3R_19382984_SNP	4	0	19382984	6.40576257395798e-06	0.0438373056931703	0.00935599702001579	0.363714253080449	0	0.478477741809294
3R_19382984_SNP	FBgn0039088	CG10164	489	UPSTREAM	20	21	205	632003	3R_19382984_SNP	4	0	19382984	6.40576257395798e-06	0.0438373056931703	0.00935599702001579	0.363714253080449	0	0.478477741809294
3R_19388102_SNP	FBgn0039089	beat-IV	0	INTRON	19	21	205	632148	3R_19388102_SNP	4	0	19388102	1.83855604448845e-05	0.0376999582159863	0.00850649362803351	0.346452106612164	0	0.478477741809294
3R_19389250_SNP	FBgn0039089	beat-IV	0	INTRON	25	28	205	632215	3R_19389250_SNP	4	0	19389250	1.84227891738302e-05	0.0415502992437274	0.0093763207735884	0.346417999465102	0	0.478477741809294
3R_19389382_SNP	FBgn0039089	beat-IV	0	INTRON	24	27	205	632220	3R_19389382_SNP	4	0	19389382	1.77835328020683e-05	0.0396946202532644	0.00894011248716232	0.347012886500245	0	0.478477741809294
3R_19426911_DEL	FBgn0051143	tRNA:CR31143	144	DOWNSTREAM	21	25	205	633929	3R_19426911_DEL	4	0	19426911	5.22249197056453e-06	0.0388118648554467	0.00819933524385767	0.366944918434038	0	0.478477741809294
3R_19426968_MNP	FBgn0051143	tRNA:CR31143	87	DOWNSTREAM	23	28	205	633935	3R_19426968_MNP	4	0	19426968	1.53018591534236e-05	0.0367275403301849	0.00820406782334698	0.349531276396604	0	0.478477741809294
3R_19426990_SNP	FBgn0051143	tRNA:CR31143	65	DOWNSTREAM	22	27	205	633936	3R_19426990_SNP	4	0	19426990	8.74358217111127e-06	0.0376969913966804	0.00817434127554015	0.358724260590713	0	0.478477741809294
3R_19428850_SNP	FBgn0039094	CG10184	0	INTRON	118	146	205	634021	3R_19428850_SNP	4	0	19428850	1.16937009620139e-05	0.0371702238371491	0.00818386066473012	0.35398433837951	0	0.478477741809294
3R_20511318_SNP	FBgn0003429	slo	0	INTRON	47	58	205	676104	3R_20511318_SNP	4	0	20511318	3.41635653805131e-05	0.0376388672363142	0.00879778497959286	0.335814693731412	0	0.478477741809294
3R_20666367_SNP	FBgn0053658	CG33658	0	NON_SYNONYMOUS_CODING	76	95	205	682219	3R_20666367_SNP	4	0	20666367	2.89234581054164e-08	0.0506571462380624	0.00863128174467228	0.439352179339971	0	0.478477741809294
3R_20666406_INS	FBgn0053658	CG33658	0	INTRON	77	97	205	682220	3R_20666406_INS	4	0	20666406	6.5958870739418e-07	0.0458201459973838	0.00880491843811238	0.397860142572555	0	0.478477741809294
3R_20666406_INS	FBgn0039232	CG13636	197	DOWNSTREAM	77	97	205	682220	3R_20666406_INS	4	0	20666406	6.5958870739418e-07	0.0458201459973838	0.00880491843811238	0.397860142572555	0	0.478477741809294
3R_20666410_SNP	FBgn0053658	CG33658	0	INTRON	78	98	205	682221	3R_20666410_SNP	4	0	20666410	1.15666264267795e-06	0.0445082407695752	0.00876319890552528	0.389774831555592	0	0.478477741809294
3R_20666410_SNP	FBgn0039232	CG13636	200	DOWNSTREAM	78	98	205	682221	3R_20666410_SNP	4	0	20666410	1.15666264267795e-06	0.0445082407695752	0.00876319890552528	0.389774831555592	0	0.478477741809294
3R_21444100_SNP	FBgn0039348	Npl4	0	INTRON	38	53	205	714325	3R_21444100_SNP	4	0	21444100	2.62814014912184e-06	0.043610579149713	0.00891311074773121	0.377559505631927	0	0.478477741809294
3R_21444100_SNP	FBgn0039347	CG5071	36	UPSTREAM	38	53	205	714325	3R_21444100_SNP	4	0	21444100	2.62814014912184e-06	0.043610579149713	0.00891311074773121	0.377559505631927	0	0.478477741809294
3R_21444118_SNP	FBgn0039348	Npl4	0	INTRON	32	45	205	714326	3R_21444118_SNP	4	0	21444118	1.4588214349682e-05	0.0392067483612593	0.00873519845030364	0.350327055253085	0	0.478477741809294
3R_21444118_SNP	FBgn0039347	CG5071	18	UPSTREAM	32	45	205	714326	3R_21444118_SNP	4	0	21444118	1.4588214349682e-05	0.0392067483612593	0.00873519845030364	0.350327055253085	0	0.478477741809294
3R_21795091_SNP	FBgn0259146	CG42261	711	UPSTREAM	79	97	205	729823	3R_21795091_SNP	4	0	21795091	6.8405880219302e-06	0.0405286465253941	0.00867860118902643	0.362667837992197	0	0.478477741809294
3R_21795155_SNP	FBgn0259146	CG42261	647	UPSTREAM	64	77	205	729828	3R_21795155_SNP	4	0	21795155	1.02945376866834e-05	-0.0426801751417634	0.00933400592876064	0.356071341291065	0	0.478477741809294
3R_21795290_SNP	FBgn0259146	CG42261	512	UPSTREAM	77	89	205	729840	3R_21795290_SNP	4	0	21795290	2.63672693115172e-06	0.0419158415082994	0.00856805226220827	0.377509959748427	0	0.478477741809294
3R_21795302_SNP	FBgn0259146	CG42261	500	UPSTREAM	83	95	205	729843	3R_21795302_SNP	4	0	21795302	1.77954945802318e-05	0.0392271823134322	0.00883516258899449	0.347001571121084	0	0.478477741809294
3R_21795309_SNP	FBgn0259146	CG42261	493	UPSTREAM	69	79	205	729845	3R_21795309_SNP	4	0	21795309	2.79360282334545e-05	-0.0384444912718225	0.00888161987057677	0.339312387903203	0	0.478477741809294
3R_21795380_SNP	FBgn0259146	CG42261	422	UPSTREAM	83	98	205	729852	3R_21795380_SNP	4	0	21795380	3.39097537281799e-05	0.039886001697399	0.00931895708225657	0.335945054211259	0	0.478477741809294
3R_21795383_SNP	FBgn0259146	CG42261	419	UPSTREAM	79	94	205	729853	3R_21795383_SNP	4	0	21795383	6.51977495754728e-06	0.0432778292834254	0.00924481241266082	0.363433524467671	0	0.478477741809294
3R_21795431_SNP	FBgn0259146	CG42261	371	UPSTREAM	84	100	205	729859	3R_21795431_SNP	4	0	21795431	8.95965124016606e-06	0.0426133444809229	0.00925211182095126	0.358329170206902	0	0.478477741809294
3R_9825245_SNP	FBgn0264493	rdx	0	INTRON	51	71	205	235961	3R_9825245_SNP	4	0	9825245	2.53399956211429e-05	-0.0369621313975661	0.00849159325920075	0.34099257148308	0	0.478477741809294
X_15294969_DEL	FBgn0263257	cngl	0	INTRON	30	33	205	415758	X_15294969_DEL	5	0	15294969	3.86696018452781e-06	-0.0382083892197359	0.0079539808471201	0.371636184828544	0	0.400461379264072
X_15294998_SNP	FBgn0263257	cngl	0	INTRON	32	35	205	415762	X_15294998_SNP	5	0	15294998	1.73151519294786e-05	-0.0358117831594953	0.00805376558819178	0.347461695413929	0	0.400461379264072
X_15295087_SNP	FBgn0263257	cngl	0	INTRON	19	22	205	415764	X_15295087_SNP	5	0	15295087	5.34959332174851e-06	-0.0377563258883038	0.00798586246987215	0.366566338890398	0	0.400461379264072
X_15383928_SNP	FBgn0027287	Gmap	0	INTRON	61	76	205	418234	X_15383928_SNP	5	0	15383928	2.78704456155276e-07	0.0428649506289082	0.00794971103281272	0.409859783435831	0	0.400461379264072
X_17378229_SNP	FBgn0263706	CG43658	0	INTRON	15	17	205	475065	X_17378229_SNP	5	0	17378229	1.93396509289848e-05	0.0361219108639444	0.00817331786136574	0.345597885418409	0	0.400461379264072
X_17571858_SNP	FBgn0263258	chas	0	INTRON	10	11	205	479927	X_17571858_SNP	5	0	17571858	3.21596041290521e-05	0.0342390485881249	0.007974847759279	0.336869746489955	0	0.400461379264072
X_19168464_SNP	FBgn0052537	CG32537	0	NON_SYNONYMOUS_CODING	47	60	205	522237	X_19168464_SNP	5	0	19168464	2.21621848852019e-05	-0.0374065262117713	0.00852871286320956	0.343285253232743	0	0.400461379264072
X_19228897_SNP	FBgn0086778	gfA	0	INTRON	17	24	205	523975	X_19228897_SNP	5	0	19228897	3.73591948022081e-05	-0.0352630622346283	0.00828602130724057	0.33424692985497	0	0.400461379264072
X_20540461_SNP	FBgn0031127	CG1835	0	INTRON	140	173	205	558983	X_20540461_SNP	5	0	20540461	2.88297786004459e-05	-0.0362261744625649	0.0083843366978937	0.33876781403752	0	0.400461379264072
X_3143708_SNP	FBgn0000479	dnc	0	INTRON	107	136	205	60393	X_3143708_SNP	5	0	3143708	2.82791575342293e-05	0.0357881745639836	0.00827375892632811	0.339101402446453	0	0.400461379264072
X_3143708_SNP	FBgn0003374	Sgs4	0	UTR_5_PRIME	107	136	205	60393	X_3143708_SNP	5	0	3143708	2.82791575342293e-05	0.0357881745639836	0.00827375892632811	0.339101402446453	0	0.400461379264072
X_3143708_SNP	FBgn0003086	Pig1	386	UPSTREAM	107	136	205	60393	X_3143708_SNP	5	0	3143708	2.82791575342293e-05	0.0357881745639836	0.00827375892632811	0.339101402446453	0	0.400461379264072
3L_11600370_SNP	FBgn0036180	CG6091	0	SYNONYMOUS_CODING	6	9	205	574377	3L_11600370_SNP	3	0	11600370	7.11912857368511e-06	-0.0384875694898088	0.00825824898230407	0.362030124828119	0	0.362515966012895
3R_20703532_SNP	FBgn0043799	CG31381	0	SYNONYMOUS_CODING	12	13	205	683406	3R_20703532_SNP	4	0	20703532	2.25222280533384e-05	-0.0387878986103642	0.00885169728271214	0.343010469580921	0	0.478477741809294
X_14085641_SNP	FBgn0030544	CG13403	0	SYNONYMOUS_CODING	8	13	205	376873	X_14085641_SNP	5	0	14085641	2.02356800118018e-05	-0.0348692465963363	0.00790979892144027	0.344831069152963	0	0.400461379264072
3R_23493101_SNP	FBgn0039536	CG18437	0	SYNONYMOUS_CODING	16	18	205	804084	3R_23493101_SNP	4	0	23493101	3.14065335702591e-05	0.0370352463007415	0.00861422701676614	0.337282273014738	0	0.478477741809294
2L_4952512_SNP	FBgn0031654	Jon25Bii	0	SYNONYMOUS_CODING	14	20	205	238888	2L_4952512_SNP	1	0	4952512	1.66087298471293e-05	0.0386500937647058	0.00867222651608409	0.348160733739381	0	0.0699418198126306
2L_2150059_SNP	FBgn0027509	CG7261	0	SYNONYMOUS_CODING	22	23	205	90470	2L_2150059_SNP	1	0	2150059	2.20620644869932e-05	0.0372838676300778	0.00849858116304692	0.343362411901826	0	0.0699418198126306
3L_15330384_SNP	FBgn0036494	Toll-6	0	SYNONYMOUS_CODING	16	23	205	752111	3L_15330384_SNP	3	0	15330384	1.5141198217911e-05	0.0366922615900495	0.00819148681228315	0.349707327045128	0	0.362515966012895
2L_2150053_SNP	FBgn0027509	CG7261	0	SYNONYMOUS_CODING	23	24	205	90469	2L_2150053_SNP	1	0	2150053	3.28397300133795e-05	0.0362889251947851	0.00846263461929299	0.336504909741501	0	0.0699418198126306
2L_2150062_SNP	FBgn0027509	CG7261	0	SYNONYMOUS_CODING	23	24	205	90471	2L_2150062_SNP	1	0	2150062	2.57589271558245e-05	0.0369129419643991	0.00848822893011664	0.340710775137635	0	0.0699418198126306
2L_2149996_SNP	FBgn0027509	CG7261	0	SYNONYMOUS_CODING	24	25	205	90467	2L_2149996_SNP	1	0	2149996	1.49090136625978e-05	0.0377319800061712	0.0084165385099809	0.349964891779294	0	0.0699418198126306
2R_20003358_SNP	FBgn0041706	CG3253	0	SYNONYMOUS_CODING	21	27	205	794943	2R_20003358_SNP	2	0	20003358	2.94222891237734e-05	-0.0354807834610248	0.00822147770423773	0.338415475852131	0	0
3L_16023670_SNP	FBgn0044028	Notum	0	SYNONYMOUS_CODING	22	32	205	780642	3L_16023670_SNP	3	0	16023670	3.34051729731558e-05	0.0357880006389228	0.00835415837212699	0.336206959016933	0	0.362515966012895
2R_19996830_SNP	FBgn0034976	CG4049	0	SYNONYMOUS_CODING	34	40	205	794726	2R_19996830_SNP	2	0	19996830	1.48937362255439e-05	-0.0368393545267966	0.00821697145208455	0.349981971618834	0	0
2R_19996899_SNP	FBgn0034976	CG4049	0	SYNONYMOUS_CODING	35	41	205	794727	2R_19996899_SNP	2	0	19996899	1.57761734988537e-05	-0.0365195521622202	0.00817117944347989	0.349021518901114	0	0
2L_10678312_SNP	FBgn0040496	CG17104	0	SYNONYMOUS_CODING	41	49	205	541719	2L_10678312_SNP	1	0	10678312	1.52641099916039e-05	0.0388643266899538	0.00868020978439146	0.34957248428307	0	0.0699418198126306
3R_20666276_SNP	FBgn0053658	CG33658	0	SYNONYMOUS_CODING	56	72	205	682216	3R_20666276_SNP	4	0	20666276	4.02403632496637e-06	-0.0449140468881297	0.00936797160257946	0.371018798076572	0	0.478477741809294
3R_20666336_SNP	FBgn0053658	CG33658	0	SYNONYMOUS_CODING	78	98	205	682218	3R_20666336_SNP	4	0	20666336	4.68043577641919e-08	0.0503675373018449	0.00872980849897821	0.433317197888684	0	0.478477741809294
2R_18595532_SNP	FBgn0050275	CG30275	0	SYNONYMOUS_CODING	139	176	205	734250	2R_18595532_SNP	2	0	18595532	2.15472831277391e-05	0.0360669118861841	0.00821028532780353	0.343764415425112	0	0
sid_index	SNP	Chr	GenDist	ChrPos	PValue	SnpWeight	SnpWeightSE	SnpFractVarExpl	Mixing	Nullh2	maf
35387	2R_1778226_SNP	2	0	1778226	8.9917463560078e-08	-0.0474660887385399	0.00842619868894636	0.424938204520941	0	0	0.114583
597079	X_22195559_SNP	5	0	22195559	2.41568116272987e-05	0.0372065276090152	0.00852452638883842	0.341812795936199	0	0.400461379264072	0.331683
758458	3L_15480194_SNP	3	0	15480194	3.11320002599162e-05	0.0337894611804494	0.0078552590950256	0.337434976820922	0	0.362515966012895	0.0490196
752765	3L_15349030_SNP	3	0	15349030	1.72694010309241e-05	0.0354332371009604	0.00796747453073608	0.347506146330319	0	0.362515966012895	0.15
950367	3R_26672281_SNP	4	0	26672281	5.64224749556855e-06	-0.0383492195103305	0.00813279069476043	0.365726069510548	0	0.478477741809294	0.08867
437214	X_16138642_SNP	5	0	16138642	3.32171861058924e-05	-0.0362362196928334	0.00845599418656021	0.336305486020808	0	0.400461379264072	0.178378
857410	3L_18120031_SNP	3	0	18120031	3.78098823415938e-05	0.0340118529593091	0.00799769546693412	0.33403604130978	0	0.362515966012895	0.0757576
468249	2L_9319081_SNP	1	0	9319081	2.29517142095039e-05	0.0393252997198569	0.00898390529821388	0.3426880468833	0	0.0699418198126306	0.381503
469993	2L_9347744_SNP	1	0	9347744	1.34481209103491e-06	-0.0567169970775509	0.0112419023430911	0.387568256147614	0	0.0699418198126306	0.416667
875016	2L_17781429_SNP	1	0	17781429	2.63141742061033e-05	0.0376802857117251	0.00867524883879989	0.340343859577453	0	0.0699418198126306	0.296875
950370	3R_26672317_SNP	4	0	26672317	1.83425038626738e-05	-0.0360586209217297	0.00813509294090817	0.346491634230262	0	0.478477741809294	0.0931373
360195	3R_13127216_SNP	4	0	13127216	4.52647525465444e-06	-0.0394491219005257	0.00827544656393131	0.369186968291157	0	0.478477741809294	0.0507614
437213	X_16138638_SNP	5	0	16138638	8.1771958344902e-06	-0.0384777632561212	0.00831486456049961	0.359805471931399	0	0.400461379264072	0.163043

## Sheet: phenotype_Cve_EDD
ID	FlybaseID	GeneSymbol	Position	Type	NbOfLinesForMutationInGWAS	NbOfLinesForMutationInDB	TotalNbOfLinesinDB	sid_index	SNP	Chr	GenDist	ChrPos	PValue	SnpWeight	SnpWeightSE	SnpFractVarExpl	Mixing	Nullh2
2L_15522241_SNP	FBgn0264261	CR43761	197	UPSTREAM	34	45	205	779569	2L_15522241_SNP	1	0	15522241	1.62072814530828e-05	0.0140850045123834	0.00315298847907771	0.353211313773962	0	0
2L_3268761_SNP	FBgn0031513	CG3347	676	UPSTREAM	146	189	205	144038	2L_3268761_SNP	1	0	3268761	6.45658037500587e-05	-0.013434642023405	0.00326097426567281	0.328826121954406	0	0
2L_4332788_SNP	FBgn0028482	CG16857	958	DOWNSTREAM	44	54	205	208256	2L_4332788_SNP	1	0	4332788	6.24774512607573e-05	0.0130341723458611	0.00315725987566558	0.329430515409376	0	0
2L_6422252_SNP	FBgn0011722	Tig	0	INTRON	115	153	205	314258	2L_6422252_SNP	1	0	6422252	4.87084764394581e-05	0.0131971872319797	0.00314800374172041	0.333966304474369	0	0
2L_8629174_SNP	FBgn0011259	Sema-1a	0	INTRON	7	11	205	429598	2L_8629174_SNP	1	0	8629174	6.1877963504233e-05	0.0122182948946795	0.00295784755156705	0.329607510022493	0	0
2R_12486076_SNP	FBgn0034143	CG8303	0	INTRON	24	27	205	435343	2R_12486076_SNP	2	0	12486076	2.29673476685824e-05	-0.0130792912528652	0.00298521688715749	0.347249708376062	0	0
2R_12486076_SNP	FBgn0034144	CG5089	177	UPSTREAM	24	27	205	435343	2R_12486076_SNP	2	0	12486076	2.29673476685824e-05	-0.0130792912528652	0.00298521688715749	0.347249708376062	0	0
2R_6127440_SNP	FBgn0005619	Hdc	0	INTRON	10	12	205	150080	2R_6127440_SNP	2	0	6127440	4.09049745440719e-05	-0.0136585255444358	0.00322387909611396	0.337105680489345	0	0
2R_6133149_SNP	FBgn0005619	Hdc	0	UTR_3_PRIME	7	8	205	150397	2R_6133149_SNP	2	0	6133149	1.31005347875998e-05	-0.013891935091508	0.00307408229115085	0.356792348629252	0	0
2R_6133149_SNP	FBgn0033498	CG12209	427	DOWNSTREAM	7	8	205	150397	2R_6133149_SNP	2	0	6133149	1.31005347875998e-05	-0.013891935091508	0.00307408229115085	0.356792348629252	0	0
2R_6133150_SNP	FBgn0005619	Hdc	0	UTR_3_PRIME	7	8	205	150398	2R_6133150_SNP	2	0	6133150	1.16028079311104e-05	-0.0138784157661104	0.00305123426222553	0.358816134881142	0	0
2R_6133150_SNP	FBgn0033498	CG12209	426	DOWNSTREAM	7	8	205	150398	2R_6133150_SNP	2	0	6133150	1.16028079311104e-05	-0.0138784157661104	0.00305123426222553	0.358816134881142	0	0
2R_9939930_SNP	FBgn0002643	mam	0	INTRON	17	22	205	321244	2R_9939930_SNP	2	0	9939930	5.83222615746809e-05	0.0121754222310114	0.00293662700047626	0.330691537416647	0	0
2R_9939931_SNP	FBgn0002643	mam	0	INTRON	16	22	205	321245	2R_9939931_SNP	2	0	9939931	4.23044315091496e-05	0.0124726530866737	0.00294991620617434	0.336503450572332	0	0
3L_14319289_SNP	FBgn0001085	fz	0	INTRON	27	33	205	707127	3L_14319289_SNP	3	0	14319289	6.13656251116619e-06	0.0141499353075617	0.00301014552064321	0.369215081649809	0	0
3L_18246742_SNP	FBgn0036783	CheA75a	796	DOWNSTREAM	43	59	205	865571	3L_18246742_SNP	3	0	18246742	9.96279210748268e-06	-0.0138497100166552	0.00302052760019679	0.361337088280981	0	0
3L_2442704_SNP	FBgn0261551	CG42669	0	INTRON	60	75	205	108959	3L_2442704_SNP	3	0	2442704	4.24135885541801e-05	-0.0130503659381688	0.00308702926748622	0.336457266311235	0	0
3L_6065766_SNP	FBgn0035673	CG6602	0	NON_SYNONYMOUS_CODING	26	35	205	292578	3L_6065766_SNP	3	0	6065766	1.00588715275926e-06	-0.0150448557803181	0.00294030557441598	0.396921379666164	0	0
3L_6065769_SNP	FBgn0035673	CG6602	0	NON_SYNONYMOUS_CODING	25	34	205	292579	3L_6065769_SNP	3	0	6065769	2.89637790621279e-06	-0.0145627389014411	0.00298648379120939	0.381027051848585	0	0
3L_7027387_INS	FBgn0260660	mp	0	INTRON	60	77	205	335425	3L_7027387_INS	3	0	7027387	5.28109903242829e-05	0.0144026800937258	0.00345259637770925	0.332500735621338	0	0
3L_7742695_SNP	FBgn0035816	CG13685	0	UTR_3_PRIME	8	10	205	372123	3L_7742695_SNP	3	0	7742695	6.266484751972e-05	-0.0120265688559012	0.00291373435436508	0.329375514158987	0	0
3L_7742695_SNP	FBgn0052373	CG32373	0	INTRON	8	10	205	372123	3L_7742695_SNP	3	0	7742695	6.266484751972e-05	-0.0120265688559012	0.00291373435436508	0.329375514158987	0	0
3L_8354431_DEL	FBgn0001248	Idh	426	UPSTREAM	28	38	205	400910	3L_8354431_DEL	3	0	8354431	1.72286779052792e-05	-0.0130250065164774	0.00292550549630211	0.352174852729191	0	0
3L_8354448_SNP	FBgn0001248	Idh	442	UPSTREAM	29	41	205	400913	3L_8354448_SNP	3	0	8354448	3.04298692482717e-05	-0.0128856018433137	0.00298883832201039	0.34234876865649	0	0
3L_8354457_SNP	FBgn0001248	Idh	451	UPSTREAM	33	46	205	400914	3L_8354457_SNP	3	0	8354457	4.43972722178385e-05	-0.0125643695542123	0.00298025909508467	0.335636842802459	0	0
3L_8354648_SNP	FBgn0001248	Idh	642	UPSTREAM	25	31	205	400933	3L_8354648_SNP	3	0	8354648	3.90861995533412e-05	-0.0125379317829781	0.00295135392136754	0.337917934468594	0	0
3R_12059730_SNP	FBgn0040071	tara	0	INTRON	40	61	205	322723	3R_12059730_SNP	4	0	12059730	3.34303555905681e-05	0.0135829957184464	0.00316794736644266	0.340692231930287	0	0
3R_12509505_SNP	FBgn0003944	Ubx	0	INTRON	32	40	205	336509	3R_12509505_SNP	4	0	12509505	6.07926520357702e-05	0.0129576405593175	0.00313336891688458	0.329932065786626	0	0
3R_12934687_SNP	FBgn0014141	cher	0	INTRON	30	36	205	352152	3R_12934687_SNP	4	0	12934687	2.28474274810027e-05	0.0136434578367505	0.00311306043728213	0.347340128771962	0	0
3R_13653245_SNP	FBgn0261649	tinc	0	INTRON	36	47	205	382503	3R_13653245_SNP	4	0	13653245	4.12407576240892e-06	0.0154598862637755	0.00322474276832932	0.375525086739588	0	0
3R_17375921_INS	FBgn0002941	slou	0	INTRON	51	67	205	544270	3R_17375921_INS	4	0	17375921	1.08398438945977e-05	0.0145669920232097	0.00319110020213487	0.359943988237125	0	0
3R_20229750_SNP	FBgn0000036	nAcRalpha-96Aa	0	INTRON	92	123	205	663592	3R_20229750_SNP	4	0	20229750	4.93933424385106e-05	0.0132262906592452	0.00315763286707957	0.333713783630681	0	0
3R_20229812_SNP	FBgn0000036	nAcRalpha-96Aa	0	INTRON	69	94	205	663597	3R_20229812_SNP	4	0	20229812	1.45736655294338e-06	-0.0155731686589517	0.00309405128924313	0.391443206654506	0	0
3R_20229841_SNP	FBgn0000036	nAcRalpha-96Aa	0	INTRON	95	129	205	663598	3R_20229841_SNP	4	0	20229841	3.067628438487e-05	0.013544122755804	0.00314305698435755	0.342207064725461	0	0
3R_20229866_SNP	FBgn0000036	nAcRalpha-96Aa	0	INTRON	72	99	205	663599	3R_20229866_SNP	4	0	20229866	1.21663159344138e-06	0.0157955977169202	0.00311302698431803	0.394123123283931	0	0
3R_21330222_SNP	FBgn0039342	CG5107	713	UPSTREAM	118	153	205	708420	3R_21330222_SNP	4	0	21330222	3.89410373626685e-05	-0.0128799766217643	0.0030311973133184	0.337984283351185	0	0
3R_22428056_SNP	FBgn0263289	scrib	0	INTRON	31	42	205	756418	3R_22428056_SNP	4	0	22428056	6.37060210196112e-05	0.0131779037698445	0.00319596896971547	0.329072704033647	0	0
3R_27268540_INS	FBgn0261988	Gprk2	0	INTRON	54	73	205	974142	3R_27268540_INS	4	0	27268540	1.53517035915894e-05	-0.0145519981420453	0.00324789030854824	0.354128057461855	0	0
3R_27269205_SNP	FBgn0261988	Gprk2	0	INTRON	19	24	205	974163	3R_27269205_SNP	4	0	27269205	3.77264963385634e-05	-0.0130386875747736	0.00306277256844049	0.338548691442683	0	0
3R_27276975_SNP	FBgn0261988	Gprk2	0	INTRON	75	96	205	974431	3R_27276975_SNP	4	0	27276975	3.24232977021784e-05	0.0136267056645647	0.00317245314654226	0.341232062355943	0	0
3R_4270844_SNP	FBgn0263416	CG43462	0	INTRON	61	75	205	78367	3R_4270844_SNP	4	0	4270844	6.19458682499989e-05	-0.0129974925120445	0.00314669402064948	0.32958738116576	0	0
3R_7971206_SNP	FBgn0037993	dpr15	0	INTRON	24	34	205	172305	3R_7971206_SNP	4	0	7971206	3.86459303799867e-05	-0.0128257555769367	0.00301707013834796	0.338119886027635	0	0
X_10596389_SNP	FBgn0052677	X11Lbeta	0	INTRON	21	33	205	276345	X_10596389_SNP	5	0	10596389	5.81913600744834e-05	-0.0121731727508658	0.00293567498471787	0.330732616145403	0	0
X_11151581_SNP	FBgn0261569	CG42683	0	INTRON	54	72	205	291052	X_11151581_SNP	5	0	11151581	6.36729299177167e-05	0.012740716736134	0.00308983966869697	0.329082256566044	0	0
X_11205540_SNP	FBgn0083979	Ir10a	299	UPSTREAM	17	24	205	292838	X_11205540_SNP	5	0	11205540	6.54280729293288e-05	0.0123181685901631	0.00299246572212985	0.328581895286947	0	0
X_11407457_SNP	FBgn0052666	Drak	0	INTRON	41	56	205	297990	X_11407457_SNP	5	0	11407457	5.56450458007669e-05	-0.0123728561949268	0.00297557566445788	0.331549402244157	0	0
X_11407530_SNP	FBgn0052666	Drak	0	INTRON	41	55	205	297995	X_11407530_SNP	5	0	11407530	4.636864761296e-05	-0.0126329612525658	0.00300441357807985	0.334854899869131	0	0
X_12903619_SNP	FBgn0261379	rad	0	INTRON	12	15	205	340109	X_12903619_SNP	5	0	12903619	4.83305649606089e-05	-0.0126015914000159	0.00300450718435284	0.334107075505475	0	0
X_13918963_SNP	FBgn0011980	tRNA:S774:12Ec	179	DOWNSTREAM	5	9	205	371895	X_13918963_SNP	5	0	13918963	4.95811420949354e-05	-0.0137617585564482	0.0032862309491935	0.33364511253799	0	0
X_13918963_SNP	FBgn0011982	tRNA:S7:12Ed	636	DOWNSTREAM	5	9	205	371895	X_13918963_SNP	5	0	13918963	4.95811420949354e-05	-0.0137617585564482	0.0032862309491935	0.33364511253799	0	0
X_16161197_SNP	FBgn0040207	kat80	0	UTR_3_PRIME	40	57	205	438239	X_16161197_SNP	5	0	16161197	2.73954213363371e-05	-0.0129367028084095	0.0029825190128074	0.344188226665556	0	0
X_16161197_SNP	FBgn0030729	CG12507	670	UPSTREAM	40	57	205	438239	X_16161197_SNP	5	0	16161197	2.73954213363371e-05	-0.0129367028084095	0.0029825190128074	0.344188226665556	0	0
X_16483617_SNP	FBgn0015615	Cap	0	INTRON	58	72	205	446194	X_16483617_SNP	5	0	16483617	2.49530934547854e-05	-0.0133613515880929	0.00306399018999896	0.345813702874899	0	0
X_16483617_SNP	FBgn0030759	CG13014	654	DOWNSTREAM	58	72	205	446194	X_16483617_SNP	5	0	16483617	2.49530934547854e-05	-0.0133613515880929	0.00306399018999896	0.345813702874899	0	0
X_16483632_SNP	FBgn0015615	Cap	0	INTRON	59	75	205	446195	X_16483632_SNP	5	0	16483632	1.62555811610901e-05	-0.0135792904510027	0.00304027768538667	0.353160932148438	0	0
X_16483632_SNP	FBgn0030759	CG13014	669	DOWNSTREAM	59	75	205	446195	X_16483632_SNP	5	0	16483632	1.62555811610901e-05	-0.0135792904510027	0.00304027768538667	0.353160932148438	0	0
X_16489513_SNP	FBgn0015374	crl	64	DOWNSTREAM	112	144	205	446294	X_16489513_SNP	5	0	16489513	2.4209681055583e-05	0.0130908687045442	0.00299679879736743	0.346338273660823	0	0
X_16489518_SNP	FBgn0015374	crl	69	DOWNSTREAM	115	146	205	446295	X_16489518_SNP	5	0	16489518	2.17650419655205e-05	0.0130138800740745	0.00296128953527643	0.348177090788985	0	0
X_16489527_SNP	FBgn0015374	crl	78	DOWNSTREAM	113	145	205	446296	X_16489527_SNP	5	0	16489527	9.12084682987853e-06	0.0136410069414732	0.00296132157303727	0.362788037389642	0	0
X_16582343_SNP	FBgn0259923	2004-09-01	0	INTRON	11	15	205	448892	X_16582343_SNP	5	0	16582343	6.2013180387838e-05	-0.0122959414757299	0.00297705044179195	0.329567448358058	0	0
X_19537303_SNP	FBgn0031049	Sec61gamma	62	UPSTREAM	41	50	205	532547	X_19537303_SNP	5	0	19537303	1.4264424655577e-05	0.0133228417610916	0.00296171274635941	0.355365242836773	0	0
X_19537303_SNP	FBgn0031048	CG12237	401	UPSTREAM	41	50	205	532547	X_19537303_SNP	5	0	19537303	1.4264424655577e-05	0.0133228417610916	0.00296171274635941	0.355365242836773	0	0
X_19537322_SNP	FBgn0031049	Sec61gamma	43	UPSTREAM	36	44	205	532548	X_19537322_SNP	5	0	19537322	6.88604368804442e-06	0.01398668077648	0.00299280149080191	0.367360458468418	0	0
X_19537322_SNP	FBgn0031048	CG12237	420	UPSTREAM	36	44	205	532548	X_19537322_SNP	5	0	19537322	6.88604368804442e-06	0.01398668077648	0.00299280149080191	0.367360458468418	0	0
X_19537335_SNP	FBgn0031049	Sec61gamma	30	UPSTREAM	37	45	205	532549	X_19537335_SNP	5	0	19537335	1.88586174955769e-06	0.0144794482254922	0.00291062115305768	0.38757594509134	0	0
X_19537335_SNP	FBgn0031048	CG12237	433	UPSTREAM	37	45	205	532549	X_19537335_SNP	5	0	19537335	1.88586174955769e-06	0.0144794482254922	0.00291062115305768	0.38757594509134	0	0
X_6844423_SNP	FBgn0029922	CG14431	0	INTRON	13	15	205	168330	X_6844423_SNP	5	0	6844423	1.39248458109183e-05	-0.0135948575582512	0.0030182479993417	0.355769914730502	0	0
X_6844423_SNP	FBgn0029920	CR4575	120	UPSTREAM	13	15	205	168330	X_6844423_SNP	5	0	6844423	1.39248458109183e-05	-0.0135948575582512	0.0030182479993417	0.355769914730502	0	0
3R_26696891_SNP	FBgn0039806	CG15545	0	SYNONYMOUS_CODING	45	58	205	951710	3R_26696891_SNP	4	0	26696891	2.72563838652563e-05	-0.0137523714989008	0.00316964130123122	0.344277030265549	0	0
3L_8342522_SNP	FBgn0035879	GapcenA	0	SYNONYMOUS_CODING	46	62	205	400490	3L_8342522_SNP	3	0	8342522	4.41006611936982e-05	-0.0129048677918745	0.00305978736787317	0.335757302669301	0	0
3L_8342501_SNP	FBgn0035879	GapcenA	0	SYNONYMOUS_CODING	47	63	205	400488	3L_8342501_SNP	3	0	8342501	1.98913799037136e-05	-0.0133345432910709	0.0030189864563338	0.349723204211134	0	0
2L_5911274_SNP	FBgn0043362	bchs	0	SYNONYMOUS_CODING	58	81	205	287105	2L_5911274_SNP	1	0	5911274	4.04550552098469e-05	0.0139177561798289	0.00328289371081337	0.337303407512676	0	0
X_1559637_SNP	FBgn0000482	dor	0	SYNONYMOUS_CODING	96	123	205	23742	X_1559637_SNP	5	0	1559637	1.99298384062507e-05	-0.0135730038704763	0.00307330606069012	0.349690113688119	0	0
sid_index	SNP	Chr	GenDist	ChrPos	PValue	SnpWeight	SnpWeightSE	SnpFractVarExpl	Mixing	Nullh2	maf
12195	X_890667_SNP	5	0	890667	3.69076032713418e-05	0.0128034726697194	0.00300360938457045	0.338938950625977	0	0	0.45641
762758	2R_19204498_SNP	2	0	19204498	3.55779038293288e-05	-0.0129592374569987	0.00303356185343877	0.339590312116436	0	0	0.0689655
11228	X_850652_SNP	5	0	850652	1.82394014986982e-05	-0.0127956057638504	0.00288304140371483	0.351204739407119	0	0	0.0588235
132802	3L_2878727_SNP	3	0	2878727	2.81956287946556e-05	-0.012990799460243	0.00299996271624276	0.343685226868504	0	0	0.193069
446291	X_16489263_SNP	5	0	16489263	2.85247800513943e-05	0.012878550831371	0.00297603431064782	0.343482213947637	0	0	0.308458
220905	X_8718656_INS	5	0	8718656	5.53153647896097e-05	-0.0170063641430662	0.00408839775677878	0.331657704745697	0	0	0.112
895474	2L_18394728_SNP	1	0	18394728	3.38426148454149e-05	-0.0127162971200022	0.00296794255043082	0.340475638255156	0	0	0.0552764
270729	2R_8913025_SNP	2	0	8913025	6.67058045283086e-05	0.0122505733434481	0.00297966729208876	0.328225478891541	0	0	0.208333
522554	3L_10713956_SNP	3	0	10713956	2.71013230593052e-05	-0.0132941829860455	0.00306303342284095	0.344376571965778	0	0	0.21875
655360	3L_13175329_SNP	3	0	13175329	5.20774595594086e-05	-0.0124442207976485	0.00298055594612038	0.332754759210067	0	0	0.0985222
96150	3L_2214022_SNP	3	0	2214022	4.16271181695795e-07	-0.0147641184964134	0.00277929437954756	0.40957655300152	0	0	0.0541872
599780	2R_16025812_SNP	2	0	16025812	4.55503695972908e-05	-0.0141887387649902	0.00337077709808685	0.335175609334962	0	0	0.0902778
261203	3L_5404880_DEL	3	0	5404880	2.93714368821808e-05	0.0129948713714284	0.00300799865921578	0.342969965857281	0	0	0.162437
865583	3L_18247005_SNP	3	0	18247005	4.59431172799479e-05	-0.0127579818639606	0.00303245196950223	0.335021010273883	0	0	0.207254
648792	2L_12780965_SNP	1	0	12780965	3.00352351507452e-05	0.0126613385586643	0.00293459421105758	0.342577970537022	0	0	0.0721649
753262	3L_15360111_SNP	3	0	15360111	4.85222807518718e-05	-0.0127903772151348	0.00305025322387225	0.334035533384118	0	0	0.307292
491995	X_18041757_SNP	5	0	18041757	2.86606375355686e-05	-0.0126901243002724	0.00293329690328808	0.343399061780062	0	0	0.0637255
491996	X_18041758_SNP	5	0	18041758	2.86606375355686e-05	-0.0126901243002724	0.00293329690328808	0.343399061780062	0	0	0.0640394
96211	3L_2215063_SNP	3	0	2215063	3.98833470025585e-07	-0.01478593080857	0.00277850148658985	0.410177297947168	0	0	0.0689655
504713	X_18483463_SNP	5	0	18483463	2.04834232275106e-05	-0.0130573557252441	0.00296107974693557	0.349220346052417	0	0	0.0603015
96208	3L_2215049_SNP	3	0	2215049	3.88092602572069e-07	-0.0148011142090567	0.00277823785614783	0.41055993452973	0	0	0.0643564
391060	3L_8135020_SNP	3	0	8135020	3.38124857203498e-05	-0.0128227991210699	0.00299264323120447	0.340491383364401	0	0	0.371134
871959	3L_18355880_SNP	3	0	18355880	2.85600040608154e-05	0.0133504029939236	0.00308529197749005	0.343460619236656	0	0	0.281915
491994	X_18041754_INS	5	0	18041754	2.86606375355686e-05	-0.0126901243002724	0.00293329690328808	0.343399061780062	0	0	0.0637255
96209	3L_2215053_SNP	3	0	2215053	1.48873747601855e-06	-0.0141341297889616	0.00281083884142248	0.391125521622981	0	0	0.0643564
196612	2L_4139714_SNP	1	0	4139714	2.60156782380628e-05	0.0145578029916173	0.00334632028844624	0.345088895363309	0	0	0.348066
417034	2L_8341416_SNP	1	0	8341416	2.14794554821469e-05	-0.0194549056501661	0.00441792891967841	0.354403596769663	0	0.787428960621076	0.119403
317696	3L_6668717_SNP	3	0	6668717	7.46796700565508e-06	-0.0199792972846167	0.00428663750118104	0.372303046469161	0	0.99999	0.130653
587218	X_21804791_SNP	5	0	21804791	1.67606445920834e-05	-0.0222595148804142	0.00498545381321064	0.358703702512748	0	0.99999	0.321637
237536	3R_9864096_SNP	4	0	9864096	1.13817421316122e-05	-0.0205617282689537	0.00450975852875879	0.365291300572958	0	0.99999	0.0923077
473624	3R_15528030_SNP	4	0	15528030	2.92923063625659e-05	-0.0194266778433327	0.00449047516844397	0.348936769269596	0	0.99999	0.466321
237548	3R_9864151_SNP	4	0	9864151	2.70937253458879e-06	-0.0219418022129579	0.00447855677818726	0.388536061477656	0	0.99999	0.0923077
147774	2R_6081767_SNP	2	0	6081767	2.62628431485372e-05	-0.0203038035703283	0.00466373610883549	0.350872077525547	0	0.99999	0.164894
183716	X_7466819_DEL	5	0	7466819	4.71344621310873e-06	-0.0209214416625528	0.00438603278280283	0.379778926880351	0	0.99999	0.0673575
317697	3L_6668751_SNP	3	0	6668751	2.21098267936479e-06	-0.0209475869907622	0.00423506228948589	0.391688903050522	0	0.99999	0.124378
963415	2L_20481532_SNP	1	0	20481532	2.69562843061213e-06	-0.0217669539258497	0.0044418008612046	0.388615338680294	0	0.787428960621076	0.134021
285232	2L_5883050_SNP	1	0	5883050	2.6919170543012e-05	-0.0198113759612513	0.00455708968456521	0.350435605359517	0	0.787428960621076	0.310526
749804	3R_22256046_SNP	4	0	22256046	6.92669192565892e-06	0.0226498758960075	0.004840963722819	0.373538022977463	0	0.99999	0.322751
183719	X_7466888_SNP	5	0	7466888	1.03693929601742e-05	-0.0203135898296359	0.00443340632942087	0.366855459678706	0	0.99999	0.0808081
237546	3R_9864144_SNP	4	0	9864144	7.07906083717025e-06	-0.0210715314020735	0.00450862508401013	0.37318139743285	0	0.99999	0.0867347
237539	3R_9864111_SNP	4	0	9864111	2.10030045709032e-06	-0.0237747241168949	0.00479518575091248	0.392480312577888	0	0.99999	0.104938
777631	2L_15482506_SNP	1	0	15482506	3.44238303918212e-06	-0.0222036731339114	0.00458406860262736	0.384779967030101	0	0.787428960621076	0.0894737
544568	2R_14757081_SNP	2	0	14757081	1.15888506645385e-05	-0.0196233612937381	0.00430808161239842	0.364987555994264	0	0.99999	0.117647
237547	3R_9864150_SNP	4	0	9864150	2.70937253458884e-06	-0.0219418022129579	0.00447855677818726	0.388536061477656	0	0.99999	0.0923077
829350	3L_17298333_SNP	3	0	17298333	3.55802634396284e-06	-0.0218901408971189	0.00452654323398723	0.384257993949876	0	0.99999	0.418848
433130	X_16010224_SNP	5	0	16010224	2.5508218062927e-05	0.0255661244138892	0.00586266834521443	0.351386780048724	0	0.99999	0.319328
317704	3L_6668841_SNP	3	0	6668841	5.70666639322611e-06	-0.0203521593625274	0.00430747546069357	0.376695086028767	0	0.99999	0.154229
130992	3R_6489573_SNP	4	0	6489573	6.33987163809751e-06	-0.0221916489937323	0.00472175608197107	0.374984589378931	0	0.99999	0.07
644055	3L_12936986_SNP	3	0	12936986	1.84937075795255e-05	-0.0220791097841953	0.00497203617762194	0.35700544319124	0	0.99999	0.06875
336763	3L_7050540_SNP	3	0	7050540	2.04758643416345e-05	0.0161077001558382	0.00364993977129286	0.352796465218529	0	0.240479468160229	0.105
806784	2L_16205117_SNP	1	0	16205117	2.79409329718752e-05	-0.0162458832558451	0.00374690648713654	0.347366367161447	0	0.191559609359813	0.448087
83059	X_3968110_SNP	5	0	3968110	2.20560145799456e-05	-0.0149474406039305	0.00340121830569456	0.351506902710814	0	0.248616959704195	0.255
950643	3R_26676810_SNP	4	0	26676810	3.77851406640992e-05	0.014741602572719	0.00346060974639046	0.341996444644054	0	0.515477010156247	0.115
133269	2R_5585533_SNP	2	0	5585533	4.7104079031488e-05	0.0141817580678581	0.00337360066652346	0.338011351203684	0	0.294479932042717	0.0555556
366670	2R_10966000_SNP	2	0	10966000	2.04129489696811e-05	0.0172642964279163	0.00391134533169091	0.352849728449363	0	0.294479932042717	0.0994764
641078	3L_12873492_SNP	3	0	12873492	3.13807222795558e-05	-0.0151423587140995	0.003516007615158	0.3453123270897	0	0.240479468160229	0.458763
235411	2R_8020976_SNP	2	0	8020976	4.65224241137799e-05	0.0148598065410758	0.00353222946902746	0.338237418018707	0	0.294479932042717	0.0547264
950622	3R_26676391_SNP	4	0	26676391	1.98947750157569e-05	0.0152916761241555	0.003459453782995	0.353294381620974	0	0.515477010156247	0.125
950758	3R_26678074_SNP	4	0	26678074	1.33648759402754e-05	0.0155937764613589	0.00345161440677218	0.360090692112788	0	0.515477010156247	0.0909091
264911	2L_5507344_SNP	1	0	5507344	1.49638372459041e-05	0.016851914284686	0.00375300083086541	0.358175868873088	0	0.191559609359813	0.414508
254430	X_9826784_SNP	5	0	9826784	3.5914288914898e-05	-0.0153124036906529	0.00358379699958743	0.342906807317086	0	0.248616959704195	0.266332
950648	3R_26676943_SNP	4	0	26676943	7.67899649749644e-06	0.0158417253946915	0.00340576293133668	0.36930675252712	0	0.515477010156247	0.113861
217249	X_8621385_SNP	5	0	8621385	1.31022801837624e-05	-0.0157989470005207	0.00349329344423205	0.360425667577416	0	0.248616959704195	0.415842
41085	3L_1121502_SNP	3	0	1121502	7.01192161898947e-06	-0.0161607834882324	0.00345824182589533	0.370791493545038	0	0.240479468160229	0.487562
722607	2R_18351438_SNP	2	0	18351438	3.23451374259694e-05	0.0151702712951976	0.00352872773048766	0.344774433080049	0	0.294479932042717	0.0696517
655360	3L_13175329_SNP	3	0	13175329	4.77444684704238e-05	-0.0145608998170316	0.00346663878185646	0.337765464204771	0	0.240479468160229	0.0985222
823678	3R_23970095_SNP	4	0	23970095	2.43169381999271e-05	0.0164596363163009	0.00376608936303068	0.349805457156764	0	0.515477010156247	0.313514
289921	X_11112326_SNP	5	0	11112326	1.51453062752424e-05	-0.0151693851951876	0.00338051272711959	0.357970889359767	0	0.248616959704195	0.148515
366687	2R_10966328_SNP	2	0	10966328	2.03833863153499e-05	0.0160668280327158	0.00363975510314832	0.352874809161343	0	0.294479932042717	0.0761421
22203	2R_1244486_DEL	2	0	1244486	7.20202443454224e-06	-0.0171532530924153	0.00367563297799727	0.370355209138583	0	0.294479932042717	0.131429

## Sheet: phenotype_Cve_FS
ID	FlybaseID	GeneSymbol	Position	Type	NbOfLinesForMutationInGWAS	NbOfLinesForMutationInDB	TotalNbOfLinesinDB	sid_index	SNP	Chr	GenDist	ChrPos	PValue	SnpWeight	SnpWeightSE	SnpFractVarExpl	Mixing	Nullh2
2L_11190559_SNP	FBgn0259822	Ca-beta	0	INTRON	41	50	205	566678	2L_11190559_SNP	1	0	11190559	2.22075876772595e-05	0.0196361307940198	0.00446747934068753	0.353820940627523	0	0.787428960621076
2L_11190564_SNP	FBgn0259822	Ca-beta	0	INTRON	40	49	205	566679	2L_11190564_SNP	1	0	11190564	2.55400989699186e-05	0.0195605204233997	0.00448582060912359	0.351364747252737	0	0.787428960621076
2L_13119633_SNP	FBgn0262352	CG43050	0	INTRON	10	15	205	663306	2L_13119633_SNP	1	0	13119633	2.68728257534991e-05	-0.0203687698049623	0.00468483889802017	0.350466095532385	0	0.787428960621076
2L_13119633_SNP	FBgn0265087	CR44198	345	UPSTREAM	10	15	205	663306	2L_13119633_SNP	1	0	13119633	2.68728257534991e-05	-0.0203687698049623	0.00468483889802017	0.350466095532385	0	0.787428960621076
2L_3081440_SNP	FBgn0015600	toc	0	INTRON	23	29	205	133360	2L_3081440_SNP	1	0	3081440	7.20871059767655e-06	-0.0207485212815793	0.00444363007604646	0.372883617499089	0	0.787428960621076
2L_6515411_SNP	FBgn0051637	CG31637	0	INTRON	69	93	205	318392	2L_6515411_SNP	1	0	6515411	1.19081327009424e-05	-0.0213539092591308	0.00469480345906252	0.364529190440733	0	0.787428960621076
2L_6515439_SNP	FBgn0051637	CG31637	0	INTRON	67	93	205	318394	2L_6515439_SNP	1	0	6515439	5.27472577075322e-07	0.0254089199730364	0.00482178327086881	0.41304079217092	0	0.787428960621076
2L_6515469_SNP	FBgn0051637	CG31637	0	INTRON	65	90	205	318396	2L_6515469_SNP	1	0	6515469	1.24778751810866e-06	-0.0248944862571293	0.00490355141877041	0.400390977104619	0	0.787428960621076
2L_6515479_SNP	FBgn0051637	CG31637	0	INTRON	63	88	205	318398	2L_6515479_SNP	1	0	6515479	3.29555006414763e-07	-0.0260658328617636	0.00485112676674641	0.419737982623104	0	0.787428960621076
2L_6515492_SNP	FBgn0051637	CG31637	0	INTRON	74	104	205	318399	2L_6515492_SNP	1	0	6515492	1.08082438953188e-05	0.0215305646675122	0.0047093137588689	0.366160448313683	0	0.787428960621076
2L_6515493_SNP	FBgn0051637	CG31637	0	INTRON	75	105	205	318400	2L_6515493_SNP	1	0	6515493	4.77149830722536e-06	0.0221335304762172	0.00464294518644361	0.379582446423549	0	0.787428960621076
2L_6515505_SNP	FBgn0051637	CG31637	0	INTRON	65	90	205	318402	2L_6515505_SNP	1	0	6515505	7.87021170597074e-07	-0.0255266867584109	0.00492740203709305	0.407226442923146	0	0.787428960621076
2L_6515599_SNP	FBgn0051637	CG31637	0	INTRON	63	88	205	318407	2L_6515599_SNP	1	0	6515599	2.26391648171982e-06	-0.0248474982289095	0.00502906237566213	0.391323622304269	0	0.787428960621076
2L_6515749_SNP	FBgn0051637	CG31637	0	INTRON	70	97	205	318419	2L_6515749_SNP	1	0	6515749	1.97482524825605e-05	-0.0220619446054427	0.00498637781497992	0.355867233825308	0	0.787428960621076
2L_7241423_SNP	FBgn0259111	Ndae1	0	INTRON	122	160	205	358163	2L_7241423_SNP	1	0	7241423	1.19060232012648e-05	-0.0212621885304278	0.00467459380631821	0.364532180618627	0	0.787428960621076
2L_7243692_SNP	FBgn0259111	Ndae1	0	INTRON	72	97	205	358316	2L_7243692_SNP	1	0	7243692	2.31438084877929e-05	0.0208890941922653	0.00476367193624862	0.353097640142403	0	0.787428960621076
2L_7481984_SNP	FBgn0260486	CG42533	0	NON_SYNONYMOUS_CODING	35	50	205	371489	2L_7481984_SNP	1	0	7481984	2.62291131609958e-05	0.0206364649842345	0.00473979784155511	0.35089478482904	0	0.787428960621076
2L_9054159_SNP	FBgn0051708	CG31708	0	INTRON	56	80	205	451766	2L_9054159_SNP	1	0	9054159	2.27899547687227e-05	0.0212438355118119	0.00484033879498826	0.35336772568955	0	0.787428960621076
2R_13756451_SNP	FBgn0034282	Mapmodulin	0	INTRON	14	16	205	491957	2R_13756451_SNP	2	0	13756451	9.43118485254292e-06	-0.0216136349379366	0.00469369549809615	0.368439582537715	0	0.99999
2R_13756497_SNP	FBgn0034282	Mapmodulin	0	INTRON	13	15	205	491959	2R_13756497_SNP	2	0	13756497	1.36456824705807e-06	-0.0231632794025304	0.00458085448582257	0.399046243788366	0	0.99999
2R_13757451_SNP	FBgn0034282	Mapmodulin	0	INTRON	14	16	205	491989	2R_13757451_SNP	2	0	13757451	1.94043744118009e-05	-0.0212956167448395	0.00480845406689901	0.356172292237828	0	0.99999
2R_1403549_SNP	FBgn0050438	CG30438	0	INTRON	10	12	205	26470	2R_1403549_SNP	2	0	1403549	2.60577682083892e-05	-0.0197274978058457	0.00452932122273723	0.351010561399868	0	0.99999
2R_14351115_SNP	FBgn0028496	CG30116	0	INTRON	4	8	205	522963	2R_14351115_SNP	2	0	14351115	2.64369210561915e-05	-0.0203274596468341	0.00467094225379257	0.350755321070364	0	0.99999
2R_14355669_SNP	FBgn0028496	CG30116	0	INTRON	16	23	205	523285	2R_14355669_SNP	2	0	14355669	2.60423539657285e-05	-0.0193337716901105	0.00443877322397281	0.351021011765315	0	0.99999
2R_1437356_SNP	FBgn0050438	CG30438	308	DOWNSTREAM	7	9	205	27353	2R_1437356_SNP	2	0	1437356	1.40721106187729e-05	-0.0197154943808986	0.00437369676535023	0.361697647559989	0	0.99999
2R_14521437_SNP	FBgn0050122	CG30122	0	NON_SYNONYMOUS_CODING	28	37	205	532132	2R_14521437_SNP	2	0	14521437	1.89311839099743e-05	0.0226438578862316	0.00510584870007736	0.356600495071973	0	0.99999
2R_5217898_SNP	FBgn0033403	CG13739	0	INTRON	41	52	205	121939	2R_5217898_SNP	2	0	5217898	1.89922609457753e-05	0.0200913420119687	0.00453110760693646	0.356544661911804	0	0.99999
2R_5217898_SNP	FBgn0033405	CG13954	0	INTRON	41	52	205	121939	2R_5217898_SNP	2	0	5217898	1.89922609457753e-05	0.0200913420119687	0.00453110760693646	0.356544661911804	0	0.99999
2R_6568890_SNP	FBgn0024836	stan	0	INTRON	8	8	205	169823	2R_6568890_SNP	2	0	6568890	2.52426889518073e-05	-0.018449362812979	0.00422816248569926	0.351571299114342	0	0.99999
2R_795740_SNP	FBgn0264911	CG44102	740	UPSTREAM	12	15	205	10463	2R_795740_SNP	2	0	795740	8.13104609827127e-06	-0.0218080881255866	0.00469954382457579	0.370900664963042	0	0.99999
3L_14325010_SNP	FBgn0001085	fz	0	INTRON	74	98	205	707448	3L_14325010_SNP	3	0	14325010	1.38265292595227e-05	-0.0210725957613204	0.0046703019895746	0.361997472746348	0	0.99999
3L_17103862_SNP	FBgn0260943	Rbp6	0	INTRON	19	26	205	821851	3L_17103862_SNP	3	0	17103862	1.94661024562618e-05	-0.0192376225081207	0.00434453844618915	0.356117159580808	0	0.99999
3L_17227174_SNP	FBgn0260943	Rbp6	0	INTRON	78	101	205	826728	3L_17227174_SNP	3	0	17227174	1.64442404755418e-05	-0.0202950065632073	0.00454070029128418	0.359031518755586	0	0.99999
3L_18102876_SNP	FBgn0002901	mus304	38	UPSTREAM	53	71	205	856580	3L_18102876_SNP	3	0	18102876	2.27256365273701e-05	0.0207224497519747	0.00472078683835725	0.3534172412265	0	0.99999
3L_18102876_SNP	FBgn0036775	CG5147	202	UPSTREAM	53	71	205	856580	3L_18102876_SNP	3	0	18102876	2.27256365273701e-05	0.0207224497519747	0.00472078683835725	0.3534172412265	0	0.99999
3L_18637380_SNP	FBgn0036801	MYPT-75D	0	INTRON	98	132	205	884708	3L_18637380_SNP	3	0	18637380	2.32686313959283e-05	0.0205699704142324	0.00469232935796826	0.353003293032125	0	0.99999
3L_18656746_SNP	FBgn0036801	MYPT-75D	0	INTRON	10	14	205	885651	3L_18656746_SNP	3	0	18656746	1.29584945105955e-05	-0.0204410418761593	0.00451451036190048	0.363099073789853	0	0.99999
3L_2388576_SNP	FBgn0035338	CG13800	0	INTRON	34	42	205	105731	3L_2388576_SNP	3	0	2388576	2.24306000097385e-05	0.0198916887745701	0.00452818000528173	0.353646079069048	0	0.99999
3L_2388576_SNP	FBgn0261551	CG42669	0	INTRON	34	42	205	105731	3L_2388576_SNP	3	0	2388576	2.24306000097385e-05	0.0198916887745701	0.00452818000528173	0.353646079069048	0	0.99999
3L_2388576_SNP	FBgn0261858	CG42787	689	UPSTREAM	34	42	205	105731	3L_2388576_SNP	3	0	2388576	2.24306000097385e-05	0.0198916887745701	0.00452818000528173	0.353646079069048	0	0.99999
3L_281027_SNP	FBgn0264707	RhoGEF3	0	NON_SYNONYMOUS_CODING	130	178	205	3152	3L_281027_SNP	3	0	281027	2.43434433877699e-05	-0.0193987444430422	0.00443653769982867	0.352210049877757	0	0.99999
3L_4118041_SNP	FBgn0035499	Chd64	0	INTRON	25	31	205	198055	3L_4118041_SNP	3	0	4118041	2.64769023179009e-05	0.0197884801665064	0.00454748785786954	0.350728607190326	0	0.99999
3L_5914667_SNP	FBgn0035649	CG10483	251	UPSTREAM	31	45	205	285229	3L_5914667_SNP	3	0	5914667	5.73179958785085e-06	0.020731971208152	0.00438882879653972	0.376623842782329	0	0.99999
3L_5914667_SNP	FBgn0052407	CG32407	488	UPSTREAM	31	45	205	285229	3L_5914667_SNP	3	0	5914667	5.73179958785085e-06	0.020731971208152	0.00438882879653972	0.376623842782329	0	0.99999
3L_5914738_SNP	FBgn0035649	CG10483	322	UPSTREAM	29	42	205	285232	3L_5914738_SNP	3	0	5914738	1.41690776300845e-06	0.022640809607259	0.00448511244130861	0.398478742075009	0	0.99999
3L_5914738_SNP	FBgn0052407	CG32407	417	UPSTREAM	29	42	205	285232	3L_5914738_SNP	3	0	5914738	1.41690776300845e-06	0.022640809607259	0.00448511244130861	0.398478742075009	0	0.99999
3L_5914739_SNP	FBgn0035649	CG10483	323	UPSTREAM	29	42	205	285233	3L_5914739_SNP	3	0	5914739	2.07421870889707e-06	0.022459481104502	0.00452728917097576	0.392672564897873	0	0.99999
3L_5914739_SNP	FBgn0052407	CG32407	416	UPSTREAM	29	42	205	285233	3L_5914739_SNP	3	0	5914739	2.07421870889707e-06	0.022459481104502	0.00452728917097576	0.392672564897873	0	0.99999
3L_5914745_INS	FBgn0035649	CG10483	330	UPSTREAM	26	38	205	285234	3L_5914745_INS	3	0	5914745	2.00804052261152e-06	0.0221821442518623	0.00446468380521149	0.393170872442729	0	0.99999
3L_5914745_INS	FBgn0052407	CG32407	409	UPSTREAM	26	38	205	285234	3L_5914745_INS	3	0	5914745	2.00804052261152e-06	0.0221821442518623	0.00446468380521149	0.393170872442729	0	0.99999
3L_8794408_SNP	FBgn0035929	CG13311	232	DOWNSTREAM	45	62	205	421821	3L_8794408_SNP	3	0	8794408	1.04450244909325e-05	0.0210962596100508	0.00460598865087781	0.366733724463994	0	0.99999
3L_8794408_SNP	FBgn0035928	CG13310	776	UPSTREAM	45	62	205	421821	3L_8794408_SNP	3	0	8794408	1.04450244909325e-05	0.0210962596100508	0.00460598865087781	0.366733724463994	0	0.99999
3L_8828384_SNP	FBgn0263930	dally	0	INTRON	24	33	205	423904	3L_8828384_SNP	3	0	8828384	1.75198121414038e-05	-0.0203075521382754	0.00455940415267189	0.357940335096346	0	0.99999
3R_10324698_SNP	FBgn0265066	CR44177	0	INTRON	6	8	205	258143	3R_10324698_SNP	4	0	10324698	2.16117556212302e-05	-0.0193546470726748	0.00439668299199483	0.354296360906263	0	0.99999
3R_12351587_SNP	FBgn0259244	CG42342	0	INTRON	58	82	205	332085	3R_12351587_SNP	4	0	12351587	9.60312043914293e-06	-0.0221396951848788	0.00481248690444724	0.368138450985207	0	0.99999
3R_21807920_SNP	FBgn0259146	CG42261	0	UTR_3_PRIME	12	13	205	730457	3R_21807920_SNP	4	0	21807920	1.93436193890302e-05	-0.020063669868877	0.00452949330911672	0.356226717345067	0	0.99999
3R_21807920_SNP	FBgn0015269	Nf1	815	UPSTREAM	12	13	205	730457	3R_21807920_SNP	4	0	21807920	1.93436193890302e-05	-0.020063669868877	0.00452949330911672	0.356226717345067	0	0.99999
3R_23240424_SNP	FBgn0016061	side	0	INTRON	52	68	205	792527	3R_23240424_SNP	4	0	23240424	1.40654848577794e-06	0.0229426053938675	0.00454339690777704	0.398589464436083	0	0.99999
X_10405684_SNP	FBgn0085443	spri	0	INTRON	19	28	205	271880	X_10405684_SNP	5	0	10405684	2.78442515427206e-05	-0.0203860880061521	0.0046984317117405	0.349837099521412	0	0.99999
X_15998801_SNP	FBgn0259699	CG42353	0	INTRON	52	70	205	432738	X_15998801_SNP	5	0	15998801	1.58984769015611e-05	-0.0198892743652931	0.00444168833773742	0.359611195633173	0	0.99999
X_15998801_SNP	FBgn0259700	CG42354	0	INTRON	52	70	205	432738	X_15998801_SNP	5	0	15998801	1.58984769015611e-05	-0.0198892743652931	0.00444168833773742	0.359611195633173	0	0.99999
X_7763427_SNP	FBgn0000427	dec-1	0	INTRON	21	25	205	191647	X_7763427_SNP	5	0	7763427	5.26210037197123e-07	-0.0228132026247806	0.00432876502567618	0.413075284635722	0	0.99999
2L_8674902_SNP	FBgn0001114	Glt	0	SYNONYMOUS_CODING	27	35	205	432097	2L_8674902_SNP	1	0	8674902	2.09827768781179e-05	-0.0212078740464596	0.00480966558737123	0.354811806021234	0	0.787428960621076
2R_14521423_SNP	FBgn0050122	CG30122	0	SYNONYMOUS_CODING	29	38	205	532131	2R_14521423_SNP	2	0	14521423	2.66468658498041e-06	0.0238419286500965	0.00486257206959412	0.388795226974108	0	0.99999
2L_7481997_SNP	FBgn0260486	CG42533	0	SYNONYMOUS_CODING	32	45	205	371492	2L_7481997_SNP	1	0	7481997	2.2653522931447e-05	0.0207427447692044	0.00472455973311502	0.353472915090111	0	0.787428960621076
2L_7471647_SNP	FBgn0031918	CG6055	0	SYNONYMOUS_CODING	68	92	205	371077	2L_7471647_SNP	1	0	7471647	1.06842277111051e-05	0.0218587896003901	0.00477818651930841	0.366354112687421	0	0.787428960621076
3L_18656288_SNP	FBgn0036801	MYPT-75D	0	SYNONYMOUS_CODING	87	107	205	885635	3L_18656288_SNP	3	0	18656288	3.95033900940185e-06	-0.0218052087222878	0.00453190013978027	0.382599740874516	0	0.99999
3L_18107754_SNP	FBgn0052195	CG32195	0	SYNONYMOUS_CODING	104	133	205	856784	3L_18107754_SNP	3	0	18107754	3.25169788433688e-06	-0.0220318289398528	0.00453615474429345	0.385678101340018	0	0.99999
sid_index	SNP	Chr	GenDist	ChrPos	PValue	SnpWeight	SnpWeightSE	SnpFractVarExpl	Mixing	Nullh2	maf
417034	2L_8341416_SNP	1	0	8341416	2.14794554821469e-05	-0.0194549056501661	0.00441792891967841	0.354403596769663	0	0.787428960621076	0.119403
317696	3L_6668717_SNP	3	0	6668717	7.46796700565508e-06	-0.0199792972846167	0.00428663750118104	0.372303046469161	0	0.99999	0.130653
587218	X_21804791_SNP	5	0	21804791	1.67606445920834e-05	-0.0222595148804142	0.00498545381321064	0.358703702512748	0	0.99999	0.321637
237536	3R_9864096_SNP	4	0	9864096	1.13817421316122e-05	-0.0205617282689537	0.00450975852875879	0.365291300572958	0	0.99999	0.0923077
473624	3R_15528030_SNP	4	0	15528030	2.92923063625659e-05	-0.0194266778433327	0.00449047516844397	0.348936769269596	0	0.99999	0.466321
237548	3R_9864151_SNP	4	0	9864151	2.70937253458879e-06	-0.0219418022129579	0.00447855677818726	0.388536061477656	0	0.99999	0.0923077
147774	2R_6081767_SNP	2	0	6081767	2.62628431485372e-05	-0.0203038035703283	0.00466373610883549	0.350872077525547	0	0.99999	0.164894
183716	X_7466819_DEL	5	0	7466819	4.71344621310873e-06	-0.0209214416625528	0.00438603278280283	0.379778926880351	0	0.99999	0.0673575
317697	3L_6668751_SNP	3	0	6668751	2.21098267936479e-06	-0.0209475869907622	0.00423506228948589	0.391688903050522	0	0.99999	0.124378
963415	2L_20481532_SNP	1	0	20481532	2.69562843061213e-06	-0.0217669539258497	0.0044418008612046	0.388615338680294	0	0.787428960621076	0.134021
285232	2L_5883050_SNP	1	0	5883050	2.6919170543012e-05	-0.0198113759612513	0.00455708968456521	0.350435605359517	0	0.787428960621076	0.310526
749804	3R_22256046_SNP	4	0	22256046	6.92669192565892e-06	0.0226498758960075	0.004840963722819	0.373538022977463	0	0.99999	0.322751
183719	X_7466888_SNP	5	0	7466888	1.03693929601742e-05	-0.0203135898296359	0.00443340632942087	0.366855459678706	0	0.99999	0.0808081
237546	3R_9864144_SNP	4	0	9864144	7.07906083717025e-06	-0.0210715314020735	0.00450862508401013	0.37318139743285	0	0.99999	0.0867347
237539	3R_9864111_SNP	4	0	9864111	2.10030045709032e-06	-0.0237747241168949	0.00479518575091248	0.392480312577888	0	0.99999	0.104938
777631	2L_15482506_SNP	1	0	15482506	3.44238303918212e-06	-0.0222036731339114	0.00458406860262736	0.384779967030101	0	0.787428960621076	0.0894737
544568	2R_14757081_SNP	2	0	14757081	1.15888506645385e-05	-0.0196233612937381	0.00430808161239842	0.364987555994264	0	0.99999	0.117647
237547	3R_9864150_SNP	4	0	9864150	2.70937253458884e-06	-0.0219418022129579	0.00447855677818726	0.388536061477656	0	0.99999	0.0923077
829350	3L_17298333_SNP	3	0	17298333	3.55802634396284e-06	-0.0218901408971189	0.00452654323398723	0.384257993949876	0	0.99999	0.418848
433130	X_16010224_SNP	5	0	16010224	2.5508218062927e-05	0.0255661244138892	0.00586266834521443	0.351386780048724	0	0.99999	0.319328
317704	3L_6668841_SNP	3	0	6668841	5.70666639322611e-06	-0.0203521593625274	0.00430747546069357	0.376695086028767	0	0.99999	0.154229
130992	3R_6489573_SNP	4	0	6489573	6.33987163809751e-06	-0.0221916489937323	0.00472175608197107	0.374984589378931	0	0.99999	0.07
644055	3L_12936986_SNP	3	0	12936986	1.84937075795255e-05	-0.0220791097841953	0.00497203617762194	0.35700544319124	0	0.99999	0.06875

## Sheet: phenotype_Cve_HP
ID	FlybaseID	GeneSymbol	Position	Type	NbOfLinesForMutationInGWAS	NbOfLinesForMutationInDB	TotalNbOfLinesinDB	sid_index	SNP	Chr	GenDist	ChrPos	PValue	SnpWeight	SnpWeightSE	SnpFractVarExpl	Mixing	Nullh2
2L_10503320_SNP	FBgn0086347	Myo31DF	0	INTRON	46	56	205	531923	2L_10503320_SNP	1	0	10503320	4.23318624861282e-05	-0.028510676565334	0.00674943169263284	0.33204171898034	0	0
2L_10678360_SNP	FBgn0040496	CG17104	0	NON_SYNONYMOUS_CODING	69	93	205	541723	2L_10678360_SNP	1	0	10678360	4.12345425959638e-05	-0.0295946797444565	0.00699504166547553	0.332506596684807	0	0
2L_4080036_SNP	FBgn0000547	ed	0	INTRON	44	56	205	193021	2L_4080036_SNP	1	0	4080036	4.60999580081642e-05	0.0287188312324093	0.00683371181346356	0.33052719849704	0	0
2L_9334496_SNP	FBgn0026439	Eaat1	0	INTRON	125	158	205	469174	2L_9334496_SNP	1	0	9334496	3.2631242319964e-05	-0.027413775124473	0.00639055663398932	0.336615986970028	0	0
2L_9349646_SNP	FBgn0263082	CG43350	0	INTRON	64	83	205	470174	2L_9349646_SNP	1	0	9349646	1.38123772058487e-05	0.0309053354280276	0.0068653645519607	0.351234982361237	0	0
2L_9349646_SNP	FBgn0032111	CG13110	824	UPSTREAM	64	83	205	470174	2L_9349646_SNP	1	0	9349646	1.38123772058487e-05	0.0309053354280276	0.0068653645519607	0.351234982361237	0	0
2R_14892976_INS	FBgn0265356	tn	0	INTRON	68	88	205	551346	2R_14892976_INS	2	0	14892976	4.89360318335402e-05	-0.028259318554432	0.00674877035835015	0.32946208083231	0	0
2R_16574892_SNP	FBgn0041240	Gr57a	477	UPSTREAM	50	64	205	627644	2R_16574892_SNP	2	0	16574892	4.40592341931513e-05	-0.029046626505621	0.00689285280063311	0.331332355668208	0	0
2R_17863183_SNP	FBgn0034674	CG9304	0	UTR_3_PRIME	119	155	205	698995	2R_17863183_SNP	2	0	17863183	2.78233468507271e-05	0.0271281278503746	0.00626580543694255	0.339382206103388	0	0
2R_17863183_SNP	FBgn0041237	Gr58c	984	UPSTREAM	119	155	205	698995	2R_17863183_SNP	2	0	17863183	2.78233468507271e-05	0.0271281278503746	0.00626580543694255	0.339382206103388	0	0
2R_18153584_SNP	FBgn0020307	dve	0	INTRON	122	156	205	713828	2R_18153584_SNP	2	0	18153584	1.28281586895568e-05	-0.0284661765889247	0.00629847509500341	0.352458688627436	0	0
2R_18597021_SNP	FBgn0050275	CG30275	0	NON_SYNONYMOUS_CODING	9	13	205	734330	2R_18597021_SNP	2	0	18597021	3.25163884410813e-05	0.0267571957835347	0.00623621375560114	0.336677463664229	0	0
2R_19197072_SNP	FBgn0034842	Prosbeta5R	0	INTRON	107	137	205	762421	2R_19197072_SNP	2	0	19197072	3.19136397116444e-05	-0.0292178101729259	0.00680227100586907	0.337003476121031	0	0
2R_19849320_SNP	FBgn0034942	CG13566	0	NON_SYNONYMOUS_CODING	126	157	205	789642	2R_19849320_SNP	2	0	19849320	1.50258013639196e-05	0.028389617637633	0.00633530257366639	0.349834868619118	0	0
2R_8954142_SNP	FBgn0033791	Drl-2	0	INTRON	32	41	205	273398	2R_8954142_SNP	2	0	8954142	4.55042191931987e-05	-0.0325800686444102	0.0077464095140691	0.330758730198517	0	0
2R_8954146_SNP	FBgn0033791	Drl-2	0	INTRON	33	41	205	273399	2R_8954146_SNP	2	0	8954146	3.56077228490555e-05	-0.0320963352867527	0.00752055112318708	0.335089842830764	0	0
2R_8954386_SNP	FBgn0033791	Drl-2	0	INTRON	16	27	205	273409	2R_8954386_SNP	2	0	8954386	1.40684148225815e-05	-0.0309524883020304	0.00688265199311877	0.350930146029132	0	0
3L_18984116_SNP	FBgn0036837	CG18135	0	NON_SYNONYMOUS_CODING	26	32	205	898257	3L_18984116_SNP	3	0	18984116	1.98669637264588e-05	-0.0274103222522568	0.00621143253852899	0.345142662545269	0	0
3L_18986057_SNP	FBgn0036837	CG18135	0	INTRON	34	42	205	898290	3L_18986057_SNP	3	0	18986057	3.16522090423094e-05	-0.0277009665998812	0.00644604052697877	0.337146681146797	0	0
3L_2092172_SNP	FBgn0086906	sls	0	INTRON	94	118	205	89464	3L_2092172_SNP	3	0	2092172	2.88956344326673e-06	0.0306161517366016	0.00628531811336778	0.376115799149335	0	0
3L_3004012_SNP	FBgn0035385	FR	0	INTRON	56	69	205	139553	3L_3004012_SNP	3	0	3004012	4.20045055200027e-05	-0.027227165621528	0.00644258320371718	0.332179207657136	0	0
3L_7172451_SNP	FBgn0265296	Dscam2	0	INTRON	51	70	205	344133	3L_7172451_SNP	3	0	7172451	1.40757018066559e-05	0.0307685207847187	0.0068419358348942	0.350921547051763	0	0
3L_8412249_SNP	FBgn0052354	CG32354	0	INTRON	95	121	205	403302	3L_8412249_SNP	3	0	8412249	4.03374968862311e-05	-0.0267134604412979	0.0063057420474424	0.332895339435312	0	0
3R_15180912_INS	FBgn0262839	CG43203	307	DOWNSTREAM	43	57	205	458340	3R_15180912_INS	4	0	15180912	1.97187659119042e-05	0.0303953733226524	0.00688500154243723	0.345269438612797	0	0.112183608751152
3R_15180964_SNP	FBgn0262839	CG43203	358	DOWNSTREAM	45	61	205	458342	3R_15180964_SNP	4	0	15180964	8.51414347246552e-06	0.0316365491488228	0.00685075246579119	0.359154035142595	0	0.112183608751152
3R_16838581_SNP	FBgn0013995	Calx	0	INTRON	37	49	205	521837	3R_16838581_SNP	4	0	16838581	1.94181467492701e-05	-0.0289184534571712	0.00654486207885915	0.34552938539202	0	0.112183608751152
3R_16838601_SNP	FBgn0013995	Calx	0	INTRON	35	47	205	521839	3R_16838601_SNP	4	0	16838601	3.0441359302029e-05	-0.0282765319780751	0.00656507119145551	0.33782480430146	0	0.112183608751152
3R_19072425_SNP	FBgn0039064	CG4467	0	INTRON	31	36	205	618849	3R_19072425_SNP	4	0	19072425	2.77614594898995e-05	-0.0280642836975542	0.0064812000226664	0.339420665208913	0	0.112183608751152
3R_19382984_SNP	FBgn0039089	beat-IV	150	UPSTREAM	20	21	205	632003	3R_19382984_SNP	4	0	19382984	4.01020181918518e-05	0.0307436437577319	0.00725453720632307	0.332998731151689	0	0.112183608751152
3R_19382984_SNP	FBgn0039088	CG10164	489	UPSTREAM	20	21	205	632003	3R_19382984_SNP	4	0	19382984	4.01020181918518e-05	0.0307436437577319	0.00725453720632307	0.332998731151689	0	0.112183608751152
3R_20114148_SNP	FBgn0039178	CG6356	0	UTR_3_PRIME	37	50	205	659742	3R_20114148_SNP	4	0	20114148	5.06147579395151e-05	-0.0305506863532362	0.00731100263204804	0.328858587918563	0	0.112183608751152
3R_20114148_SNP	FBgn0085319	CG34290	127	DOWNSTREAM	37	50	205	659742	3R_20114148_SNP	4	0	20114148	5.06147579395151e-05	-0.0305506863532362	0.00731100263204804	0.328858587918563	0	0.112183608751152
3R_20496939_SNP	FBgn0003429	slo	0	INTRON	14	17	205	675508	3R_20496939_SNP	4	0	20496939	4.92615412263913e-05	-0.0268499273585399	0.00641477401211327	0.329343559932038	0	0.112183608751152
3R_20496939_SNP	FBgn0261637	CG42720	569	DOWNSTREAM	14	17	205	675508	3R_20496939_SNP	4	0	20496939	4.92615412263913e-05	-0.0268499273585399	0.00641477401211327	0.329343559932038	0	0.112183608751152
3R_20666367_SNP	FBgn0053658	CG33658	0	NON_SYNONYMOUS_CODING	76	95	205	682219	3R_20666367_SNP	4	0	20666367	4.58936984466633e-06	0.0325095825047202	0.00682431651426538	0.368971392558143	0	0.112183608751152
3R_21444100_SNP	FBgn0039348	Npl4	0	INTRON	38	53	205	714325	3R_21444100_SNP	4	0	21444100	3.11994835413426e-05	0.0297810861194447	0.00692427760400013	0.337397323547581	0	0.112183608751152
3R_21444100_SNP	FBgn0039347	CG5071	36	UPSTREAM	38	53	205	714325	3R_21444100_SNP	4	0	21444100	3.11994835413426e-05	0.0297810861194447	0.00692427760400013	0.337397323547581	0	0.112183608751152
3R_24517089_SNP	FBgn0039594	CG9990	0	INTRON	15	20	205	844829	3R_24517089_SNP	4	0	24517089	8.89252811726059e-06	0.0293348296490323	0.00636662873758009	0.358450933865745	0	0.112183608751152
3R_25238581_SNP	FBgn0004369	Ptp99A	0	INTRON	22	27	205	876867	3R_25238581_SNP	4	0	25238581	1.94009472627214e-05	0.0279782293388992	0.00633175746192417	0.345544372313302	0	0.112183608751152
3R_26129309_SNP	FBgn0010113	hdc	0	INTRON	10	11	205	923230	3R_26129309_SNP	4	0	26129309	1.19218999975751e-05	0.0282555127259826	0.00622747710130977	0.353666540184233	0	0.112183608751152
3R_26129334_INS	FBgn0010113	hdc	0	INTRON	11	13	205	923237	3R_26129334_INS	4	0	26129334	2.92572452921263e-06	0.0298161174894746	0.00612467628238818	0.375925944706266	0	0.112183608751152
X_11793524_SNP	FBgn0260780	wisp	0	UTR_3_PRIME	13	17	205	305626	X_11793524_SNP	5	0	11793524	4.0846661241138e-05	0.0264368474976448	0.0062451227512774	0.332673704322427	0	0
X_11793524_SNP	FBgn0030354	Upf1	946	DOWNSTREAM	13	17	205	305626	X_11793524_SNP	5	0	11793524	4.0846661241138e-05	0.0264368474976448	0.0062451227512774	0.332673704322427	0	0
X_11794447_SNP	FBgn0030354	Upf1	23	DOWNSTREAM	20	26	205	305649	X_11794447_SNP	5	0	11794447	4.77682518827619e-05	0.0266364792676598	0.00635187921659583	0.329893453720646	0	0
X_11794447_SNP	FBgn0260780	wisp	504	DOWNSTREAM	20	26	205	305649	X_11794447_SNP	5	0	11794447	4.77682518827619e-05	0.0266364792676598	0.00635187921659583	0.329893453720646	0	0
X_14706075_SNP	FBgn0003301	rut	0	INTRON	59	78	205	397039	X_14706075_SNP	5	0	14706075	2.32119288555351e-05	-0.0273684775026284	0.0062563404795713	0.342495452027213	0	0
X_14794177_SNP	FBgn0264078	Flo-2	0	INTRON	14	16	205	400580	X_14794177_SNP	5	0	14794177	2.13720218428348e-05	-0.0300194012362725	0.00683049701428897	0.343903347043806	0	0
X_15294969_DEL	FBgn0263257	cngl	0	INTRON	30	33	205	415758	X_15294969_DEL	5	0	15294969	1.19535058506909e-05	-0.0281290194559245	0.00620047103792568	0.353622978420595	0	0
X_15294998_SNP	FBgn0263257	cngl	0	INTRON	32	35	205	415762	X_15294998_SNP	5	0	15294998	5.11749132657116e-05	-0.0261041329350716	0.00625111246997635	0.328661387212467	0	0
X_15295087_SNP	FBgn0263257	cngl	0	INTRON	19	22	205	415764	X_15295087_SNP	5	0	15295087	2.52088515388787e-05	-0.0269440104213662	0.00618822353689273	0.341081687735951	0	0
X_15383928_SNP	FBgn0027287	Gmap	0	INTRON	61	76	205	418234	X_15383928_SNP	5	0	15383928	2.52827654350277e-05	0.0274560865217637	0.00630688400748734	0.341031407564505	0	0
X_19174841_SNP	FBgn0031010	CG8028	459	UPSTREAM	20	24	205	522530	X_19174841_SNP	5	0	19174841	3.55592518773736e-05	-0.0280365689496953	0.00656877256626503	0.33511371966182	0	0
X_19174841_SNP	FBgn0031011	CG8034	575	DOWNSTREAM	20	24	205	522530	X_19174841_SNP	5	0	19174841	3.55592518773736e-05	-0.0280365689496953	0.00656877256626503	0.33511371966182	0	0
X_20650245_SNP	FBgn0085387	shakB	0	INTRON	28	31	205	562205	X_20650245_SNP	5	0	20650245	2.90536039991646e-05	0.0278607163895893	0.0064510802397907	0.33863392198098	0	0
X_20650245_SNP	FBgn0052507	CG32507	932	DOWNSTREAM	28	31	205	562205	X_20650245_SNP	5	0	20650245	2.90536039991646e-05	0.0278607163895893	0.0064510802397907	0.33863392198098	0	0
X_20833353_SNP	FBgn0011834	Ser6	277	DOWNSTREAM	5	8	205	566660	X_20833353_SNP	5	0	20833353	1.37979494254497e-05	-0.096921303864136	0.0215290535577492	0.351252318275554	0	0
X_20833358_SNP	FBgn0011834	Ser6	272	DOWNSTREAM	5	8	205	566661	X_20833358_SNP	5	0	20833358	3.86151630192881e-05	-0.0965120135992691	0.0227226567469689	0.333665040303622	0	0
X_21493635_SNP	FBgn0052500	CG32500	0	INTRON	28	37	205	585025	X_21493635_SNP	5	0	21493635	3.4364288486586e-05	-0.0436498424075888	0.010206311800125	0.335712243043934	0	0
X_8431837_SNP	FBgn0264975	Nrg	0	INTRON	97	127	205	211695	X_8431837_SNP	5	0	8431837	4.40565704649518e-05	0.0269370167080963	0.00639221271266499	0.331333429317384	0	0
X_8431841_SNP	FBgn0264975	Nrg	0	INTRON	94	124	205	211696	X_8431841_SNP	5	0	8431841	3.87736525742895e-05	0.0274240945083586	0.00645826300960884	0.33359287928382	0	0
3R_17574315_SNP	FBgn0051343	CG31343	0	SYNONYMOUS_CODING	13	20	205	552010	3R_17574315_SNP	4	0	17574315	4.3379903134285e-05	0.0258909644735153	0.00613826402114486	0.331608161963598	0	0.112183608751152
2L_2150053_SNP	FBgn0027509	CG7261	0	SYNONYMOUS_CODING	23	24	205	90469	2L_2150053_SNP	1	0	2150053	3.93891153931563e-05	0.0275446901501167	0.00649274181006592	0.333315258046925	0	0
3L_18984155_SNP	FBgn0036837	CG18135	0	SYNONYMOUS_CODING	24	30	205	898258	3L_18984155_SNP	3	0	18984155	3.33270666360596e-05	-0.0266805197708499	0.00622730345899924	0.336247832390268	0	0
2R_4884715_SNP	FBgn0265011	Np	0	SYNONYMOUS_CODING	31	42	205	112698	2R_4884715_SNP	2	0	4884715	1.91472298932567e-05	-0.0290139044911728	0.00656134187105382	0.345766917975922	0	0
2R_19915631_SNP	FBgn0061198	HSPC300	0	SYNONYMOUS_CODING	38	47	205	791974	2R_19915631_SNP	2	0	19915631	9.87708895384323e-06	0.0294969777979287	0.00643691129278683	0.356746115763338	0	0
2L_10313168_SNP	FBgn0032216	CG5384	0	SYNONYMOUS_CODING	55	71	205	522242	2L_10313168_SNP	1	0	10313168	3.85851717285638e-05	0.0305424807413607	0.00719054807709866	0.33367872676751	0	0
2L_9349595_SNP	FBgn0263082	CG43350	0	SYNONYMOUS_CODING	76	98	205	470167	2L_9349595_SNP	1	0	9349595	3.86874010223245e-05	0.0277215508571899	0.00652744887725248	0.333632115578516	0	0
3R_20666336_SNP	FBgn0053658	CG33658	0	SYNONYMOUS_CODING	78	98	205	682218	3R_20666336_SNP	4	0	20666336	1.02877608261075e-05	0.0315926932828889	0.00690897340191804	0.356082087507802	0	0.112183608751152
2R_19196899_SNP	FBgn0034842	Prosbeta5R	0	SYNONYMOUS_CODING	86	110	205	762416	2R_19196899_SNP	2	0	19196899	3.30120388115469e-05	-0.0282870537200776	0.00659860446070983	0.336413606929767	0	0
3L_11452627_SNP	FBgn0036161	CG7551	0	SYNONYMOUS_STOP	74	97	205	567348	3L_11452627_SNP	3	0	11452627	3.28607415793194e-05	0.0273276437221124	0.00637308793713838	0.336493752079129	0	0
sid_index	SNP	Chr	GenDist	ChrPos	PValue	SnpWeight	SnpWeightSE	SnpFractVarExpl	Mixing	Nullh2	maf
863004	3L_18212572_SNP	3	0	18212572	2.86186794291296e-05	-0.0267285075580406	0.00618353458613451	0.338894992243778	0	0	0.0854271
437215	X_16138643_SNP	5	0	16138643	1.01109916801685e-05	-0.0288331084327622	0.00629975400385359	0.356364783492553	0	0	0.123656
430713	3R_14624085_SNP	4	0	14624085	1.81603465249905e-05	0.0268915013315419	0.00606357717201737	0.346659835330613	0	0.112183608751152	0.0735294
726357	2L_14442041_SNP	1	0	14442041	4.17516833864372e-05	-0.0263905518512021	0.00624236321190583	0.332286082155284	0	0	0.0561224
35387	2R_1778226_SNP	2	0	1778226	5.74262578573168e-06	-0.0313028649522077	0.00664430155786948	0.365447349984885	0	0	0.114583
585760	X_21589434_SNP	5	0	21589434	2.83621587584106e-05	-0.0432299806675069	0.0099958951808737	0.339050727954263	0	0	0.230769
757586	2R_19105102_SNP	2	0	19105102	3.48737803244322e-05	0.0275175970754857	0.00643979820192314	0.335454698265536	0	0	0.385787
320309	3L_6719592_SNP	3	0	6719592	5.02033309443919e-05	0.026237661661309	0.00627573680212509	0.329004737398804	0	0	0.306931
153043	2L_3429661_SNP	1	0	3429661	2.53109445935985e-05	-0.0306934347790787	0.00705097658247373	0.341012275018087	0	0	0.489474
469993	2L_9347744_SNP	1	0	9347744	4.87874123131706e-07	-0.0450288205015468	0.00854398679650066	0.40211432418695	0	0	0.416667
141766	X_5916751_SNP	5	0	5916751	3.75607528881876e-05	-0.0266656156468371	0.00626781311621626	0.334152321790536	0	0	0.0738916
360195	3R_13127216_SNP	4	0	13127216	1.69463178242098e-05	-0.0282287216139857	0.00634089392160062	0.347823247295348	0	0.112183608751152	0.0507614
900774	3L_19051695_SNP	3	0	19051695	1.25951558637042e-05	0.0295880063606009	0.00654027912057715	0.352761345108767	0	0	0.056701
950370	3R_26672317_SNP	4	0	26672317	3.97550839662795e-05	-0.026331557228684	0.00621020565545836	0.333152103143313	0	0.112183608751152	0.0931373
469928	2L_9347039_SNP	1	0	9347039	1.49587053043455e-05	-0.0299948950721743	0.00669190354289794	0.349909451588981	0	0	0.335135
437229	X_16138748_SNP	5	0	16138748	1.63440188232026e-05	-0.0280844566962442	0.0062959909483532	0.348429920967272	0	0	0.13198
950371	3R_26672345_SNP	4	0	26672345	5.17003528153524e-05	-0.0259799380787628	0.00622526049314807	0.328478239449238	0	0.112183608751152	0.0784314
469905	2L_9346891_INS	1	0	9346891	2.01654308253916e-05	-0.0283796866604927	0.00643644726525701	0.344890020296498	0	0	0.220513
470000	2L_9347781_SNP	1	0	9347781	2.75681679331121e-05	0.0284888057502068	0.00657659760490594	0.339541305266048	0	0	0.326425
437226	X_16138729_INS	5	0	16138729	1.75017630356414e-05	-0.0278410436169482	0.00626490821647993	0.347281526321363	0	0	0.137056
437213	X_16138638_SNP	5	0	16138638	6.76828031732758e-08	-0.0349141896018891	0.00613309528340381	0.428611505866926	0	0	0.163043
470036	2L_9348013_SNP	1	0	9348013	8.60288327615578e-06	-0.0292263448136885	0.00633222388926416	0.358986527586388	0	0	0.295337
437227	X_16138734_DEL	5	0	16138734	3.9467748499202e-05	-0.0270614996137423	0.00637960314931242	0.333280082372027	0	0	0.136364
950367	3R_26672281_SNP	4	0	26672281	3.07123628074576e-05	-0.0268258070298999	0.0062314560451358	0.337670856458367	0	0.112183608751152	0.08867
496623	2R_13828258_SNP	2	0	13828258	2.42427600772633e-05	-0.0282168142918874	0.00646616281721055	0.34175195335535	0	0	0.403141
437214	X_16138642_SNP	5	0	16138642	5.21735220864834e-07	-0.0327464493106403	0.00623086172904344	0.401172788618178	0	0	0.178378
221251	X_8725609_SNP	5	0	8725609	4.21555433058549e-05	-0.0271782358722733	0.0064323886717931	0.332115647838725	0	0	0.267327
717353	3R_21515539_SNP	4	0	21515539	3.34626553524555e-05	0.0271149518524985	0.00633020583425915	0.336176935585379	0	0.112183608751152	0.136126
470005	2L_9347789_SNP	1	0	9347789	3.92126913266379e-05	-0.0269636771652437	0.00635408960402185	0.333394420028661	0	0	0.234694

## Sheet: phenotype_Cve_AI
ID	FlybaseID	GeneSymbol	Position	Type	NbOfLinesForMutationInGWAS	NbOfLinesForMutationInDB	TotalNbOfLinesinDB	sid_index	SNP	Chr	GenDist	ChrPos	PValue	SnpWeight	SnpWeightSE	SnpFractVarExpl	Mixing	Nullh2
2L_10560973_DEL	FBgn0051721	Trim9	0	INTRON	22	27	205	535894	2L_10560973_DEL	1	0	10560973	3.03603391094912e-05	-0.0669109319191901	0.0155217536937505	0.341242541210211	0	0
2L_16013316_SNP	FBgn0028644	beat-Ic	0	INTRON	43	57	205	798183	2L_16013316_SNP	1	0	16013316	1.49855102352628e-05	0.068455960891428	0.0152626782165096	0.353353969893937	0	0
2L_16013546_SNP	FBgn0028644	beat-Ic	0	INTRON	54	65	205	798190	2L_16013546_SNP	1	0	16013546	4.91669149815588e-05	0.0622441613838884	0.0148593199218711	0.332675536773967	0	0
2L_16318268_SNP	FBgn0000250	cact	0	INTRON	9	14	205	811488	2L_16318268_SNP	1	0	16318268	5.7432842922227e-05	-0.0605160760635252	0.0145853992793057	0.329859295289658	0	0
2L_16323778_SNP	FBgn0000250	cact	0	INTRON	12	13	205	811742	2L_16323778_SNP	1	0	16323778	4.33882170470271e-05	-0.0608390918184061	0.0144143147255593	0.334921812497891	0	0
2L_16332968_SNP	FBgn0028899	CG31817	0	NON_SYNONYMOUS_CODING	47	65	205	812094	2L_16332968_SNP	1	0	16332968	3.58898273553932e-05	-0.0629995462707568	0.0147583082724362	0.338297651977461	0	0
2L_17699330_SNP	FBgn0015609	CadN	0	INTRON	30	36	205	871844	2L_17699330_SNP	1	0	17699330	4.24226216669198e-05	-0.0621911769397706	0.0147147354973272	0.335324306700528	0	0
2L_17699336_SNP	FBgn0015609	CadN	0	INTRON	28	31	205	871845	2L_17699336_SNP	1	0	17699336	2.05020164794175e-05	-0.0645298636624486	0.0146381334823028	0.348038727456343	0	0
2L_19064874_SNP	FBgn0032751	CG17343	103	UPSTREAM	10	12	205	918969	2L_19064874_SNP	1	0	19064874	5.741959359107e-05	-0.0581260843845137	0.0140091705700579	0.329863497025607	0	0
2L_19064874_SNP	FBgn0032750	CG10495	148	DOWNSTREAM	10	12	205	918969	2L_19064874_SNP	1	0	19064874	5.741959359107e-05	-0.0581260843845137	0.0140091705700579	0.329863497025607	0	0
2L_19064874_SNP	FBgn0032752	CG10702	398	DOWNSTREAM	10	12	205	918969	2L_19064874_SNP	1	0	19064874	5.741959359107e-05	-0.0581260843845137	0.0140091705700579	0.329863497025607	0	0
2L_20051903_SNP	FBgn0032840	sNPF	0	INTRON	69	90	205	952070	2L_20051903_SNP	1	0	20051903	5.13757344081837e-05	0.0616299354309221	0.0147522436294803	0.331881893081966	0	0
2L_2245988_INS	FBgn0262106	CR42859	88	DOWNSTREAM	21	26	205	94131	2L_2245988_INS	1	0	2245988	5.81638623852014e-05	-0.0799052859425278	0.0192736332096072	0.329628864419455	0	0
2L_2245988_INS	FBgn0264979	CG4267	715	DOWNSTREAM	21	26	205	94131	2L_2245988_INS	1	0	2245988	5.81638623852014e-05	-0.0799052859425278	0.0192736332096072	0.329628864419455	0	0
2L_3759056_SNP	FBgn0263846	CG43707	0	SYNONYMOUS_CODING	28	39	205	172378	2L_3759056_SNP	1	0	3759056	4.76237410362038e-06	0.0665432714195614	0.0139823125650974	0.372021789250366	0	0
2L_506999_SNP	FBgn0003963	ush	0	INTRON	11	14	205	9413	2L_506999_SNP	1	0	506999	1.99302804914771e-05	0.0635845221006293	0.0144009165858186	0.348522294679322	0	0
2L_5854964_SNP	FBgn0085410	TrissinR	0	INTRON	30	42	205	283576	2L_5854964_SNP	1	0	5854964	2.30785930963128e-05	0.0635409074837852	0.0145101052756898	0.346006030429508	0	0
2L_6555245_SNP	FBgn0031829	osm-6	566	DOWNSTREAM	11	15	205	320569	2L_6555245_SNP	1	0	6555245	9.13490912327356e-06	0.0647624010643845	0.0140641616769194	0.361558258864713	0	0
2L_9204894_SNP	FBgn0041092	tai	0	INTRON	26	32	205	461910	2L_9204894_SNP	1	0	9204894	8.96153412462196e-06	0.0685213830574915	0.0148656707969187	0.361871361537018	0	0
2L_9204898_SNP	FBgn0041092	tai	0	INTRON	26	32	205	461911	2L_9204898_SNP	1	0	9204898	9.54303485382738e-06	0.0686163972228521	0.0149350982717659	0.360842835341936	0	0
2L_9204905_SNP	FBgn0041092	tai	0	INTRON	27	33	205	461914	2L_9204905_SNP	1	0	9204905	1.22759097348084e-05	0.068059602542479	0.0150121699259116	0.356687068158337	0	0
2R_13565280_SNP	FBgn0016059	Sema-1b	0	INTRON	75	95	205	483136	2R_13565280_SNP	2	0	13565280	2.6304640375457e-05	-0.0634626290155497	0.0146005693904615	0.343742950627991	0	0
2R_13565304_SNP	FBgn0016059	Sema-1b	0	INTRON	73	93	205	483138	2R_13565304_SNP	2	0	13565304	3.63381901223697e-06	0.0699914814894751	0.0145143439741428	0.376261643102766	0	0
2R_9078346_SNP	FBgn0053182	Kdm4B	0	INTRON	73	100	205	277891	2R_9078346_SNP	2	0	9078346	2.88452531566257e-05	-0.0624512673062086	0.0144443123562306	0.342137654024164	0	0
2R_9078346_SNP	FBgn0028991	seq	755	UPSTREAM	73	100	205	277891	2R_9078346_SNP	2	0	9078346	2.88452531566257e-05	-0.0624512673062086	0.0144443123562306	0.342137654024164	0	0
2R_9078346_SNP	FBgn0033802	CG17724	755	UPSTREAM	73	100	205	277891	2R_9078346_SNP	2	0	9078346	2.88452531566257e-05	-0.0624512673062086	0.0144443123562306	0.342137654024164	0	0
2R_9078365_SNP	FBgn0053182	Kdm4B	0	INTRON	74	99	205	277896	2R_9078365_SNP	2	0	9078365	4.95388595986573e-05	-0.060275182478749	0.0143958875774131	0.332539583168177	0	0
2R_9078365_SNP	FBgn0028991	seq	774	UPSTREAM	74	99	205	277896	2R_9078365_SNP	2	0	9078365	4.95388595986573e-05	-0.060275182478749	0.0143958875774131	0.332539583168177	0	0
2R_9078365_SNP	FBgn0033802	CG17724	774	UPSTREAM	74	99	205	277896	2R_9078365_SNP	2	0	9078365	4.95388595986573e-05	-0.060275182478749	0.0143958875774131	0.332539583168177	0	0
3L_13485015_SNP	FBgn0036373	CG10741	0	INTRON	120	151	205	670590	3L_13485015_SNP	3	0	13485015	4.93050871051291e-05	0.0608744363010255	0.0145348171200797	0.33262491970832	0	0
3L_19923952_SNP	FBgn0036921	RhoGDI	0	NON_SYNONYMOUS_CODING	24	31	205	923084	3L_19923952_SNP	3	0	19923952	3.18287957937702e-05	-0.064235300199579	0.0149421024176243	0.340414188673377	0	0
3L_21728632_INS	FBgn0264480	CR43888	333	UPSTREAM	32	40	205	958232	3L_21728632_INS	3	0	21728632	3.89199329135801e-05	-0.0622615130783758	0.0146556739369942	0.336860311425247	0	0
3L_21728632_INS	FBgn0037125	CG14573	745	DOWNSTREAM	32	40	205	958232	3L_21728632_INS	3	0	21728632	3.89199329135801e-05	-0.0622615130783758	0.0146556739369942	0.336860311425247	0	0
3L_21728643_SNP	FBgn0264480	CR43888	323	UPSTREAM	34	43	205	958233	3L_21728643_SNP	3	0	21728643	2.19351512017667e-05	-0.0638455025726574	0.0145379121991948	0.34688027754625	0	0
3L_21728643_SNP	FBgn0037125	CG14573	755	DOWNSTREAM	34	43	205	958233	3L_21728643_SNP	3	0	21728643	2.19351512017667e-05	-0.0638455025726574	0.0145379121991948	0.34688027754625	0	0
3L_2523624_SNP	FBgn0010905	Spn	0	INTRON	23	28	205	112972	3L_2523624_SNP	3	0	2523624	5.91470091284949e-06	0.066050540793352	0.0140290329770869	0.368581159595621	0	0
3L_6482273_SNP	FBgn0035703	CG8270	0	NON_SYNONYMOUS_CODING	6	8	205	308644	3L_6482273_SNP	3	0	6482273	2.64957110761324e-05	-0.0597504521780904	0.0137522272045452	0.343617255780787	0	0
3R_13991711_SNP	FBgn0038570	Prx5	0	INTRON	37	56	205	400429	3R_13991711_SNP	4	0	13991711	3.64752426458759e-05	-0.0627964890949362	0.0147248125760728	0.338011293633906	0	0
3R_13991711_SNP	FBgn0022943	Cbp20	550	DOWNSTREAM	37	56	205	400429	3R_13991711_SNP	4	0	13991711	3.64752426458759e-05	-0.0627964890949362	0.0147248125760728	0.338011293633906	0	0
3R_13991711_SNP	FBgn0038571	CG7215	591	DOWNSTREAM	37	56	205	400429	3R_13991711_SNP	4	0	13991711	3.64752426458759e-05	-0.0627964890949362	0.0147248125760728	0.338011293633906	0	0
3R_14065618_SNP	FBgn0038588	CG7156	0	NON_SYNONYMOUS_CODING	140	178	205	404209	3R_14065618_SNP	4	0	14065618	5.53937455591171e-05	-0.0598603323356241	0.0143951408811723	0.330516889064093	0	0
3R_14441348_SNP	FBgn0263974	qin	0	INTRON	40	58	205	423190	3R_14441348_SNP	4	0	14441348	3.83945493525725e-05	0.0649147721815226	0.0152678728216308	0.337101822255649	0	0
3R_14441348_SNP	FBgn0038629	CG14304	0	INTRON	40	58	205	423190	3R_14441348_SNP	4	0	14441348	3.83945493525725e-05	0.0649147721815226	0.0152678728216308	0.337101822255649	0	0
3R_18725400_SNP	FBgn0017590	klg	0	INTRON	48	65	205	602560	3R_18725400_SNP	4	0	18725400	1.84108397502779e-05	0.0682673231236258	0.0153934919962039	0.349873915627763	0	0
3R_20092094_SNP	FBgn0011225	jar	0	INTRON	111	144	205	658834	3R_20092094_SNP	4	0	20092094	4.16454731681187e-05	-0.0654531769411215	0.0154693726415404	0.33565454392558	0	0
3R_20514162_SNP	FBgn0003429	slo	0	INTRON	16	22	205	676204	3R_20514162_SNP	4	0	20514162	3.79335528455266e-05	0.0599769050300478	0.0140963726661704	0.337316305189087	0	0
3R_21476475_SNP	FBgn0039350	jigr1	356	DOWNSTREAM	15	19	205	715655	3R_21476475_SNP	4	0	21476475	3.79417072129576e-05	-0.0631540907762071	0.0148432961024058	0.337312490076785	0	0
3R_21476475_SNP	FBgn0262388	mir-92b	645	UPSTREAM	15	19	205	715655	3R_21476475_SNP	4	0	21476475	3.79417072129576e-05	-0.0631540907762071	0.0148432961024058	0.337312490076785	0	0
3R_2600434_SNP	FBgn0261638	CR42721	0	INTRON	95	122	205	39044	3R_2600434_SNP	4	0	2600434	2.77246303802205e-05	-0.0649179568012417	0.0149805520009359	0.342828630083806	0	0
3R_2600435_SNP	FBgn0261638	CR42721	0	INTRON	96	124	205	39045	3R_2600435_SNP	4	0	2600435	2.41662999883911e-05	-0.0646607422082946	0.0148044321660159	0.345211448952378	0	0
3R_26698495_SNP	FBgn0039806	CG15545	422	UPSTREAM	20	28	205	951780	3R_26698495_SNP	4	0	26698495	2.8205169987306e-05	0.0625057516641856	0.0144381973295704	0.342529170346275	0	0
3R_26705950_SNP	FBgn0039808	CG12071	0	INTRON	19	22	205	952058	3R_26705950_SNP	4	0	26705950	3.72769231274121e-05	-0.0629359159813132	0.014776514368171	0.337626073302865	0	0
3R_27142509_SNP	FBgn0085376	CG34347	0	INTRON	117	156	205	969864	3R_27142509_SNP	4	0	27142509	4.65515481529591e-05	0.061366227979219	0.0146011378006484	0.333659681003756	0	0
3R_3049448_SNP	FBgn0037487	CG14608	688	UPSTREAM	49	66	205	50220	3R_3049448_SNP	4	0	3049448	2.49408877996465e-05	-0.0659677932786444	0.0151308283130705	0.344665870596135	0	0
4_537417_SNP	FBgn0004607	zfh2	0	INTRON	78	98	205	4056	4_537417_SNP	6	0	537417	5.95514462824304e-05	0.0584736249542793	0.0141248565699967	0.329198838724186	0	0
4_905422_DEL	FBgn0025726	unc-13	0	INTRON	9	13	205	6855	4_905422_DEL	6	0	905422	1.11673435950608e-06	-0.0793667452602109	0.0155875927104647	0.394093078352586	0	0
X_4046046_SNP	FBgn0000635	Fas2	0	INTRON	103	132	205	84613	X_4046046_SNP	5	0	4046046	1.16769774433638e-05	0.0647479288375827	0.0142437019463907	0.35751714968374	0	0
X_4094884_SNP	FBgn0000635	Fas2	0	INTRON	56	76	205	85797	X_4094884_SNP	5	0	4094884	1.85034890184409e-05	-0.0639876678703119	0.0144324919634003	0.349788541869152	0	0
X_5279292_SNP	FBgn0029761	SK	0	INTRON	13	16	205	120066	X_5279292_SNP	5	0	5279292	4.99242876530982e-05	0.0581281336224201	0.0138896631505324	0.332399707245339	0	0
X_5356668_DEL	FBgn0029768	SPR	0	INTRON	34	47	205	122618	X_5356668_DEL	5	0	5356668	1.90442529469849e-06	0.0679612920142963	0.0136717719915679	0.386155650777867	0	0
X_5590850_SNP	FBgn0261927	CG42794	306	UPSTREAM	13	18	205	131413	X_5590850_SNP	5	0	5590850	2.39815449395139e-06	-0.0695923402052437	0.0141499617622136	0.382662601819857	0	0
X_6336047_SNP	FBgn0259242	CG42340	0	INTRON	61	81	205	153256	X_6336047_SNP	5	0	6336047	5.7063056476103e-05	0.0613938691836896	0.0147910442317123	0.329976907477769	0	0
X_6503450_SNP	FBgn0029881	pigs	0	INTRON	80	103	205	158423	X_6503450_SNP	5	0	6503450	1.59508680752618e-05	-0.063651829686174	0.0142399374087266	0.35230290227834	0	0
X_6571208_DEL	FBgn0025815	Mcm6	4	DOWNSTREAM	8	10	205	160537	X_6571208_DEL	5	0	6571208	2.34418647938954e-05	-0.0619134557153929	0.0141509690703057	0.345736806938772	0	0
X_6571208_DEL	FBgn0029888	CG3192	85	DOWNSTREAM	8	10	205	160537	X_6571208_DEL	5	0	6571208	2.34418647938954e-05	-0.0619134557153929	0.0141509690703057	0.345736806938772	0	0
X_6592817_SNP	FBgn0029894	CG14440	217	UPSTREAM	47	56	205	161019	X_6592817_SNP	5	0	6592817	1.49453605088435e-05	0.0651657356869271	0.0145269842197548	0.353399054697696	0	0
X_6592817_SNP	FBgn0029895	CG14441	724	UPSTREAM	47	56	205	161019	X_6592817_SNP	5	0	6592817	1.49453605088435e-05	0.0651657356869271	0.0145269842197548	0.353399054697696	0	0
X_6593025_SNP	FBgn0029894	CG14440	425	UPSTREAM	110	140	205	161035	X_6593025_SNP	5	0	6593025	1.63869162062631e-05	0.0632192841980053	0.0141640598000504	0.351847676067772	0	0
X_6593025_SNP	FBgn0029895	CG14441	516	UPSTREAM	110	140	205	161035	X_6593025_SNP	5	0	6593025	1.63869162062631e-05	0.0632192841980053	0.0141640598000504	0.351847676067772	0	0
X_6593163_INS	FBgn0029895	CG14441	377	UPSTREAM	93	117	205	161038	X_6593163_INS	5	0	6593163	3.52028189662151e-05	0.0656557672644211	0.0153630295259675	0.338639354721763	0	0
X_6593163_INS	FBgn0029894	CG14440	564	UPSTREAM	93	117	205	161038	X_6593163_INS	5	0	6593163	3.52028189662151e-05	0.0656557672644211	0.0153630295259675	0.338639354721763	0	0
X_6594064_SNP	FBgn0029895	CG14441	0	INTRON	40	48	205	161050	X_6594064_SNP	5	0	6594064	3.55406176365256e-05	0.0607062851160397	0.0142128833745185	0.338470565796801	0	0
X_6833030_SNP	FBgn0029922	CG14431	0	INTRON	104	135	205	167980	X_6833030_SNP	5	0	6833030	4.86472038799887e-05	-0.0596390869491654	0.0142282052612325	0.33286712643483	0	0
3L_3331520_SNP	FBgn0035439	CG14961	0	SYNONYMOUS_CODING	22	25	205	154521	3L_3331520_SNP	3	0	3331520	2.25109791578468e-05	-0.0614112437446775	0.0140040601571171	0.34643478708848	0	0
2L_3759056_SNP	FBgn0263846	CG43707	0	SYNONYMOUS_CODING	28	39	205	172378	2L_3759056_SNP	1	0	3759056	4.76237410362038e-06	0.0665432714195614	0.0139823125650974	0.372021789250366	0	0
2L_16332969_SNP	FBgn0028899	CG31817	0	SYNONYMOUS_CODING	47	66	205	812095	2L_16332969_SNP	1	0	16332969	4.47775952430462e-05	-0.0620333689905683	0.0147252214628621	0.334357178082947	0	0
3L_13510823_SNP	FBgn0036377	CG10710	0	SYNONYMOUS_CODING	117	151	205	671372	3L_13510823_SNP	3	0	13510823	4.83307725481737e-05	-0.0616971729538198	0.014713360637327	0.332984720070709	0	0
sid_index	SNP	Chr	GenDist	ChrPos	PValue	SnpWeight	SnpWeightSE	SnpFractVarExpl	Mixing	Nullh2	maf
161056	X_6594296_SNP	5	0	6594296	6.48804902318268e-06	0.0650497498578292	0.0138809547368748	0.367100030316151	0	0	0.240196
844111	2L_17026175_SNP	1	0	17026175	1.1708735075124e-05	-0.0655683648073979	0.0144262696265349	0.357472137050044	0	0	0.278947
743370	3L_15143992_SNP	3	0	15143992	2.61145558954931e-05	-0.0596703008137923	0.01372238512616	0.343868851925203	0	0	0.175879
645577	3L_12972228_SNP	3	0	12972228	1.17180230948006e-05	-0.0617090348492234	0.0135777170078461	0.357458994183162	0	0	0.0837438
608251	3R_18855268_SNP	4	0	18855268	1.29822750265838e-06	-0.0759267427823979	0.0150118683796638	0.391874582065426	0	0	0.157895
132465	X_5612922_SNP	5	0	5612922	2.76946956121395e-05	0.0625944130641607	0.0144434697328755	0.342847445795064	0	0	0.0643564
608250	3R_18855266_SNP	4	0	18855266	3.89031296776786e-07	-0.0796725099615476	0.0149616287626863	0.40919294299849	0	0	0.153439
608246	3R_18855195_SNP	4	0	18855195	6.48936598839436e-06	-0.0695276353844814	0.0148366420914308	0.367096773112377	0	0	0.197917
318358	3R_11942442_SNP	4	0	11942442	2.87398204226758e-05	-0.0609510649704557	0.0140943489746595	0.342201577900035	0	0	0.221649
714847	3R_21456473_SNP	4	0	21456473	6.1293555203825e-06	-0.065549819063829	0.0139476239558919	0.368011340984785	0	0	0.0923077
853915	2L_17271185_SNP	1	0	17271185	2.10426649692199e-05	-0.0655780628712244	0.0148976129155852	0.347592999351123	0	0	0.299465
560970	X_20604177_SNP	5	0	20604177	8.72840360067474e-06	-0.068600777175195	0.0148625600755099	0.362301528592366	0	0	0.487047
73088	3R_4032837_SNP	4	0	4032837	1.8271773480539e-05	-0.0630638579807096	0.0142142026746701	0.350002824375085	0	0	0.11
888847	3R_25453601_SNP	4	0	25453601	3.27334327402596e-05	-0.0639460696578513	0.0148992019746376	0.339921589654797	0	0	0.414894
581838	X_21345486_INS	5	0	21345486	3.53269630165261e-06	-0.0782997339790255	0.0162152051960163	0.376700655607854	0	0	0.109589
558034	3L_11309025_SNP	3	0	11309025	1.93763902121463e-05	0.0644684595270575	0.0145782021222477	0.349003395536576	0	0	0.109375
714851	3R_21456544_INS	4	0	21456544	7.5768127812283e-06	-0.0656167393773579	0.0141128473167013	0.364600051454899	0	0	0.0885417
714843	3R_21456433_SNP	4	0	21456433	1.80449665595263e-05	-0.0615722431267147	0.0138684170415852	0.350215062217326	0	0	0.095
161054	X_6594232_SNP	5	0	6594232	4.15837691113953e-05	0.0601799080898383	0.0142218108386458	0.335681011387964	0	0	0.237624
714845	3R_21456441_SNP	4	0	21456441	7.89254592609543e-06	-0.0645428068874411	0.0139109583246531	0.363938638516402	0	0	0.0862944
434058	3L_9025697_SNP	3	0	9025697	2.96171394047997e-05	-0.0641943782716333	0.0148701821217239	0.341676242254702	0	0	0.439394
434059	3L_9025698_SNP	3	0	9025698	1.74737663584256e-05	-0.0653356012780872	0.0146899632034585	0.350760918510063	0	0	0.44
714848	3R_21456486_SNP	4	0	21456486	1.1111161381988e-06	-0.0698121865886758	0.0137080333180627	0.394167102301661	0	0	0.0862944
853937	2L_17271541_SNP	1	0	17271541	5.76291743831877e-05	-0.0642391922782659	0.0154860075604308	0.329797139265219	0	0	0.41989
843136	2L_17003815_SNP	1	0	17003815	3.4468327956691e-06	-0.0715359962456494	0.0147969916281795	0.377082882239972	0	0	0.145251
116431	X_5167090_SNP	5	0	5167090	3.80146463720642e-05	0.0598482443625886	0.0140679173809763	0.337278398877693	0	0	0.407035
853928	2L_17271461_INS	1	0	17271461	3.38400264437279e-05	-0.0671814092969853	0.0156835554427519	0.339336128861654	0	0	0.418605
508448	3R_16491414_SNP	4	0	16491414	4.77448041095344e-05	-0.0639165889400849	0.0152313373778817	0.333204399757548	0	0	0.117347

## Sheet: phenotype_Cve_SI
ID	FlybaseID	GeneSymbol	Position	Type	NbOfLinesForMutationInGWAS	NbOfLinesForMutationInDB	TotalNbOfLinesinDB	sid_index	SNP	Chr	GenDist	ChrPos	PValue	SnpWeight	SnpWeightSE	SnpFractVarExpl	Mixing	Nullh2
2L_14588839_SNP	FBgn0261566	CG42680	605	UPSTREAM	5	10	205	734105	2L_14588839_SNP	1	0	14588839	3.12604989397227e-05	-0.0219344843627759	0.00509813292301513	0.339596902801203	0	0
2L_17628186_SNP	FBgn0262356	CG43054	0	NON_SYNONYMOUS_CODING	21	27	205	869394	2L_17628186_SNP	1	0	17628186	3.7036501677428e-05	-0.0105288387911529	0.00247165311628312	0.336615899255436	0	0
2L_1874285_SNP	FBgn0051663	CG31663	0	INTRON	21	26	205	77687	2L_1874285_SNP	1	0	1874285	2.38591167003787e-05	-0.0107438382258849	0.00245866809633534	0.344285360860944	0	0
2L_1874285_SNP	FBgn0264884	CR44075	774	DOWNSTREAM	21	26	205	77687	2L_1874285_SNP	1	0	1874285	2.38591167003787e-05	-0.0107438382258849	0.00245866809633534	0.344285360860944	0	0
2L_19088259_SNP	FBgn0002023	Lim3	0	INTRON	12	16	205	919761	2L_19088259_SNP	1	0	19088259	3.76775398358153e-05	-0.00994386231200912	0.00233670443306245	0.336312481212993	0	0
2L_19088443_SNP	FBgn0002023	Lim3	0	INTRON	107	136	205	919766	2L_19088443_SNP	1	0	19088443	2.23668955000257e-05	-0.011058651456809	0.00252148542405154	0.345395037524668	0	0
2L_19088749_SNP	FBgn0002023	Lim3	0	INTRON	22	30	205	919787	2L_19088749_SNP	1	0	19088749	2.4204180957933e-06	-0.0117304910529011	0.00238686131408928	0.381271558432581	0	0
2L_19096354_SNP	FBgn0002023	Lim3	0	INTRON	8	10	205	920047	2L_19096354_SNP	1	0	19096354	2.37134979149865e-05	-0.0102044344422827	0.00233441795789555	0.344390727718659	0	0
2L_19096437_SNP	FBgn0002023	Lim3	0	INTRON	9	11	205	920050	2L_19096437_SNP	1	0	19096437	3.59660316183313e-05	-0.00995046927027245	0.00233183351327386	0.337133749078667	0	0
2L_19099428_SNP	FBgn0002023	Lim3	0	INTRON	8	9	205	920183	2L_19099428_SNP	1	0	19099428	2.20267087307516e-05	-0.0102692837611253	0.00233948069713039	0.345657755176598	0	0
2L_19107023_SNP	FBgn0002023	Lim3	0	INTRON	7	8	205	920571	2L_19107023_SNP	1	0	19107023	1.84259955519057e-05	-0.0111059607503052	0.00250500071923411	0.348700266363726	0	0
2L_19107883_SNP	FBgn0002023	Lim3	0	INTRON	8	9	205	920615	2L_19107883_SNP	1	0	19107883	2.66972966760406e-05	-0.010106616047858	0.00232771604734138	0.342344125149294	0	0
2L_19108368_INS	FBgn0002023	Lim3	255	UPSTREAM	9	10	205	920630	2L_19108368_INS	1	0	19108368	6.10220643473403e-05	-0.0100931725575289	0.00244234020959401	0.327654511250493	0	0
2L_8401598_SNP	FBgn0001084	fy	0	UTR_3_PRIME	73	95	205	419789	2L_8401598_SNP	1	0	8401598	2.59993335520091e-05	-0.011630171701086	0.00267455493858951	0.342802829074262	0	0
2L_8401598_SNP	FBgn0051898	CG31898	121	DOWNSTREAM	73	95	205	419789	2L_8401598_SNP	1	0	8401598	2.59993335520091e-05	-0.011630171701086	0.00267455493858951	0.342802829074262	0	0
2L_8401649_SNP	FBgn0001084	fy	0	UTR_3_PRIME	70	90	205	419792	2L_8401649_SNP	1	0	8401649	4.67934836809322e-05	-0.0110432307278353	0.00262898137752439	0.332453736387399	0	0
2L_8401649_SNP	FBgn0051898	CG31898	172	DOWNSTREAM	70	90	205	419792	2L_8401649_SNP	1	0	8401649	4.67934836809322e-05	-0.0110432307278353	0.00262898137752439	0.332453736387399	0	0
2L_8401704_SNP	FBgn0001084	fy	0	UTR_3_PRIME	46	61	205	419795	2L_8401704_SNP	1	0	8401704	4.99413667225844e-05	0.0119143016917239	0.00284760592761735	0.331284193338748	0	0
2L_8401704_SNP	FBgn0051898	CG31898	227	DOWNSTREAM	46	61	205	419795	2L_8401704_SNP	1	0	8401704	4.99413667225844e-05	0.0119143016917239	0.00284760592761735	0.331284193338748	0	0
2R_10097017_SNP	FBgn0005613	Sox15	0	INTRON	29	35	205	327075	2R_10097017_SNP	2	0	10097017	5.23087884682007e-05	0.00984941791890613	0.00236076321112446	0.330449318334861	0	0
2R_14222340_SNP	FBgn0010575	sbb	0	INTRON	38	47	205	516333	2R_14222340_SNP	2	0	14222340	3.98893824788109e-05	-0.010332860383478	0.00243636780703548	0.335301539941632	0	0
2R_14222876_SNP	FBgn0010575	sbb	0	INTRON	22	24	205	516381	2R_14222876_SNP	2	0	14222876	5.19009034045702e-05	-0.0101024354643528	0.00242024616658184	0.330590599841321	0	0
2R_14224968_SNP	FBgn0010575	sbb	0	INTRON	25	28	205	516507	2R_14224968_SNP	2	0	14224968	3.63130035121812e-05	-0.0103601598309069	0.00242921922481715	0.336964330334033	0	0
2R_14225660_SNP	FBgn0010575	sbb	0	INTRON	17	21	205	516553	2R_14225660_SNP	2	0	14225660	4.8853824532491e-05	-0.00966241896943365	0.00230629170323322	0.331680230346889	0	0
2R_14229745_SNP	FBgn0010575	sbb	0	INTRON	21	25	205	516806	2R_14229745_SNP	2	0	14229745	2.4364226461746e-05	-0.0107112072291131	0.00245411817101728	0.343924506622987	0	0
2R_14229747_SNP	FBgn0010575	sbb	0	INTRON	21	25	205	516807	2R_14229747_SNP	2	0	14229747	3.05071256578227e-05	-0.0106475482034052	0.00247125302759518	0.340023318648832	0	0
2R_14229748_SNP	FBgn0010575	sbb	0	INTRON	20	24	205	516808	2R_14229748_SNP	2	0	14229748	1.06014966163622e-05	-0.011141038231808	0.00243902147821017	0.357928309872451	0	0
2R_14229753_SNP	FBgn0010575	sbb	0	INTRON	21	25	205	516809	2R_14229753_SNP	2	0	14229753	2.26178067501862e-05	-0.0107495696851156	0.0024525544045533	0.345203665102381	0	0
2R_14229757_SNP	FBgn0010575	sbb	0	INTRON	21	25	205	516810	2R_14229757_SNP	2	0	14229757	2.22681725317786e-05	-0.0107282850035554	0.00244554866126554	0.345470889107565	0	0
2R_14230117_SNP	FBgn0010575	sbb	0	INTRON	22	27	205	516843	2R_14230117_SNP	2	0	14230117	4.94373504908457e-05	-0.0103323558263864	0.00246798165222114	0.331466718644972	0	0
2R_14230425_DEL	FBgn0010575	sbb	0	INTRON	24	29	205	516882	2R_14230425_DEL	2	0	14230425	3.83014703198581e-05	-0.0103350755260452	0.00243100436470311	0.336021781218417	0	0
2R_6928347_INS	FBgn0040765	luna	0	INTRON	7	9	205	186721	2R_6928347_INS	2	0	6928347	2.54829979499559e-05	-0.0106718172522819	0.00245135391465942	0.343149684514468	0	0
3L_10035416_SNP	FBgn0040823	dpr6	0	INTRON	64	80	205	482869	3L_10035416_SNP	3	0	10035416	2.65142887110286e-05	0.0105409984289341	0.0024268042833935	0.342463297309173	0	0
3L_3775747_DEL	FBgn0052264	CG32264	0	INTRON	16	23	205	178454	3L_3775747_DEL	3	0	3775747	2.22987397131285e-05	0.0106664211367333	0.00243163456125527	0.345447369712215	0	0
3L_3781858_SNP	FBgn0052264	CG32264	0	INTRON	19	24	205	178912	3L_3781858_SNP	3	0	3781858	3.76475082161008e-05	-0.00974459711422835	0.00228977089057316	0.336326587231915	0	0
3L_4228421_SNP	FBgn0001257	ImpL2	0	INTRON	16	26	205	203585	3L_4228421_SNP	3	0	4228421	4.39286668862165e-05	-0.00970409019325609	0.00230137898178817	0.333584132201871	0	0
3L_6138003_SNP	FBgn0020642	Lcp65Ac	0	UTR_5_PRIME	11	16	205	295728	3L_6138003_SNP	3	0	6138003	4.71622150808145e-05	-0.00972865549135089	0.00231713284123261	0.33231298751772	0	0
3L_6138003_SNP	FBgn0020641	Lcp65Ad	802	DOWNSTREAM	11	16	205	295728	3L_6138003_SNP	3	0	6138003	4.71622150808145e-05	-0.00972865549135089	0.00231713284123261	0.33231298751772	0	0
3L_8854318_SNP	FBgn0263930	dally	0	INTRON	35	47	205	425498	3L_8854318_SNP	3	0	8854318	3.83294416669294e-05	0.010173232844494	0.00239303970511638	0.336008853292213	0	0
3R_14350093_SNP	FBgn0004652	fru	0	INTRON	41	53	205	418437	3R_14350093_SNP	4	0	14350093	2.42091586098622e-05	0.0107567784153143	0.00246366534242855	0.344034533333939	0	0
3R_14677678_DEL	FBgn0051226	CG31226	159	UPSTREAM	13	18	205	433623	3R_14677678_DEL	4	0	14677678	8.0726265901313e-06	-0.011041249658549	0.00238313056532062	0.362374270603457	0	0
3R_14677695_SNP	FBgn0051226	CG31226	175	UPSTREAM	14	19	205	433628	3R_14677695_SNP	4	0	14677695	2.46380252373096e-05	-0.0104301516564446	0.00239124274953199	0.343731835140692	0	0
3R_14677749_SNP	FBgn0051226	CG31226	229	UPSTREAM	14	18	205	433639	3R_14677749_SNP	4	0	14677749	3.37467867712969e-05	-0.0103726467923046	0.00242167454850538	0.338255128759674	0	0
3R_14677753_SNP	FBgn0051226	CG31226	233	UPSTREAM	14	18	205	433640	3R_14677753_SNP	4	0	14677753	3.79679008635029e-05	-0.0103154570146549	0.00242512971889681	0.336176638996168	0	0
3R_15290001_SNP	FBgn0260003	Dys	0	INTRON	128	159	205	462944	3R_15290001_SNP	4	0	15290001	1.78212152953152e-05	0.0113239182819224	0.00254945456345877	0.349265650751912	0	0
3R_15294845_SNP	FBgn0260003	Dys	0	INTRON	73	94	205	463199	3R_15294845_SNP	4	0	15294845	7.84966362606219e-06	0.0117403328083696	0.00253037584327458	0.362827473048348	0	0
3R_16077944_SNP	FBgn0262582	cic	548	UPSTREAM	54	67	205	493530	3R_16077944_SNP	4	0	16077944	5.8285389577955e-05	0.0115694682099551	0.00279159843839199	0.328489670785222	0	0
3R_19399061_INS	FBgn0039089	beat-IV	0	INTRON	10	11	205	632553	3R_19399061_INS	4	0	19399061	9.95607147872235e-06	0.0125091084092225	0.00272950226440952	0.358958970653335	0	0
3R_19399067_INS	FBgn0039089	beat-IV	0	INTRON	10	11	205	632554	3R_19399067_INS	4	0	19399067	9.95607147872235e-06	0.0125091084092225	0.00272950226440952	0.358958970653335	0	0
3R_21009368_SNP	FBgn0083946	lobo	0	INTRON	43	60	205	695352	3R_21009368_SNP	4	0	21009368	1.3271527022516e-05	-0.0115010032768853	0.00254809267576867	0.354212984054187	0	0
3R_21009368_SNP	FBgn0039286	dan	737	UPSTREAM	43	60	205	695352	3R_21009368_SNP	4	0	21009368	1.3271527022516e-05	-0.0115010032768853	0.00254809267576867	0.354212984054187	0	0
3R_21738736_SNP	FBgn0250757	CG42235	6	DOWNSTREAM	43	52	205	727147	3R_21738736_SNP	4	0	21738736	3.55124590427162e-05	0.0133697363682981	0.00313077338197031	0.337357549080231	0	0
3R_25427708_SNP	FBgn0086361	alph	0	INTRON	78	94	205	887466	3R_25427708_SNP	4	0	25427708	5.91637747871644e-05	-0.0103751119676655	0.00250573745263195	0.328217678511104	0	0
3R_27206871_SNP	FBgn0039844	CG1607	960	UPSTREAM	75	92	205	972145	3R_27206871_SNP	4	0	27206871	3.80369331831214e-05	-0.0108925960102518	0.00256108933296649	0.336144486560272	0	0
3R_7166359_SNP	FBgn0004595	pros	0	INTRON	9	12	205	150406	3R_7166359_SNP	4	0	7166359	4.91165921735548e-05	-0.00963219892001853	0.00229982990469848	0.331583789496746	0	0
X_12446556_DEL	FBgn0264542	CG43921	0	INTRON	27	34	205	326549	X_12446556_DEL	5	0	12446556	2.60529678442846e-05	-0.0103864960529198	0.00238883222164674	0.342767171935514	0	0
X_12446556_DEL	FBgn0030398	Cpr11B	600	UPSTREAM	27	34	205	326549	X_12446556_DEL	5	0	12446556	2.60529678442846e-05	-0.0103864960529198	0.00238883222164674	0.342767171935514	0	0
X_12446560_SNP	FBgn0264542	CG43921	0	INTRON	29	36	205	326550	X_12446560_SNP	5	0	12446560	2.80675014907957e-05	-0.0102054286451051	0.00235724555272777	0.341475531245789	0	0
X_12446560_SNP	FBgn0030398	Cpr11B	597	UPSTREAM	29	36	205	326550	X_12446560_SNP	5	0	12446560	2.80675014907957e-05	-0.0102054286451051	0.00235724555272777	0.341475531245789	0	0
X_14845499_SNP	FBgn0027601	pdgy	0	INTRON	41	48	205	402396	X_14845499_SNP	5	0	14845499	4.90206035305205e-05	-0.0102121735888085	0.00243801686109149	0.331618962981271	0	0
X_15569186_SNP	FBgn0030666	CG12708	348	UPSTREAM	23	30	205	424844	X_15569186_SNP	5	0	15569186	5.56167753130321e-05	0.0100839236739351	0.00242610618393148	0.329340223376546	0	0
X_19667002_DEL	FBgn0259789	vfl	0	INTRON	20	26	205	536009	X_19667002_DEL	5	0	19667002	7.20797114821279e-06	-0.0115642918120184	0.00248158858991731	0.364203221651466	0	0
X_21085304_SNP	FBgn0052521	CG32521	0	INTRON	53	68	205	574454	X_21085304_SNP	5	0	21085304	5.01774322391682e-05	-0.0101752756367556	0.00243266610341965	0.331199297434049	0	0
X_21862064_DEL	FBgn0031187	CG14619	0	INTRON	46	55	205	588151	X_21862064_DEL	5	0	21862064	2.26708918858678e-05	0.0109063073154571	0.00248864395298689	0.345163432866144	0	0
X_3188221_SNP	FBgn0000479	dnc	0	INTRON	21	29	205	61942	X_3188221_SNP	5	0	3188221	2.68085702359797e-05	-0.0107956374789182	0.0024870019167377	0.342272040565398	0	0
X_8934392_DEL	FBgn0264384	CR43836	0	INTRON	32	41	205	228938	X_8934392_DEL	5	0	8934392	2.65966560227049e-05	0.0107955858608159	0.00248585857863859	0.342409565436708	0	0
X_8934392_DEL	FBgn0259734	CG42388	0	INTRON	32	41	205	228938	X_8934392_DEL	5	0	8934392	2.65966560227049e-05	0.0107955858608159	0.00248585857863859	0.342409565436708	0	0
2R_8854602_SNP	FBgn0005624	Psc	0	SYNONYMOUS_CODING	44	56	205	267734	2R_8854602_SNP	2	0	8854602	4.68973770031182e-05	-0.00977921268305987	0.00232837889879965	0.332413974174335	0	0
2R_8854599_SNP	FBgn0005624	Psc	0	SYNONYMOUS_CODING	82	104	205	267733	2R_8854599_SNP	2	0	8854599	2.11155611814602e-05	0.0107642590539244	0.00244642922085633	0.346380700238036	0	0
2R_16878410_SNP	FBgn0034568	CG3216	0	SYNONYMOUS_CODING	102	131	205	644627	2R_16878410_SNP	2	0	16878410	5.22236252420228e-05	-0.0100168377189908	0.00240065144219645	0.330478731293081	0	0
3R_19886009_SNP	FBgn0040283	SMC1	0	SYNONYMOUS_CODING	105	137	205	651553	3R_19886009_SNP	4	0	19886009	5.8057053797616e-05	0.010368974479363	0.00250132225623753	0.328561003888254	0	0

## Sheet: phenotype_Cve_ESD
ID	FlybaseID	GeneSymbol	Position	Type	NbOfLinesForMutationInGWAS	NbOfLinesForMutationInDB	TotalNbOfLinesinDB	sid_index	SNP	Chr	GenDist	ChrPos	PValue	SnpWeight	SnpWeightSE	SnpFractVarExpl	Mixing	Nullh2
2L_10314560_SNP	FBgn0032216	CG5384	164	UPSTREAM	27	40	205	522323	2L_10314560_SNP	1	0	10314560	4.04967318901641e-05	0.0160652591563248	0.00378696609000707	0.340749405962418	0	0.191559609359813
2L_10314560_SNP	FBgn0032217	CG4972	232	UPSTREAM	27	40	205	522323	2L_10314560_SNP	1	0	10314560	4.04967318901641e-05	0.0160652591563248	0.00378696609000707	0.340749405962418	0	0.191559609359813
2L_10346790_SNP	FBgn0032225	CG5022	0	INTRON	26	32	205	523647	2L_10346790_SNP	1	0	10346790	4.77032474842114e-05	0.0207547530245138	0.00494100293371677	0.337781198217552	0	0.191559609359813
2L_13226147_SNP	FBgn0032489	CG15480	872	UPSTREAM	60	78	205	667536	2L_13226147_SNP	1	0	13226147	2.60668748632584e-05	0.0184233907926561	0.00423218424831251	0.34858786213579	0	0.191559609359813
2L_14039815_SNP	FBgn0028875	nAcRalpha-34E	355	UPSTREAM	43	55	205	705146	2L_14039815_SNP	1	0	14039815	4.07083477106897e-05	-0.0147420206472584	0.00347613188493724	0.340655411325994	0	0.191559609359813
2L_14730254_SNP	FBgn0261571	CG42685	253	UPSTREAM	16	22	205	739976	2L_14730254_SNP	1	0	14730254	1.11853369348547e-05	-0.0162867745757609	0.00357085402238974	0.363082536407971	0	0.191559609359813
2L_14730256_SNP	FBgn0261571	CG42685	255	UPSTREAM	17	23	205	739977	2L_14730256_SNP	1	0	14730256	5.96503086102391e-06	-0.0166109793565275	0.00352560497273169	0.373415322261881	0	0.191559609359813
2L_16234826_SNP	FBgn0261999	CG42817	0	INTRON	86	121	205	808406	2L_16234826_SNP	1	0	16234826	4.24337106908767e-05	0.0156567257781042	0.00370102739149549	0.339905716148693	0	0.191559609359813
2L_17653979_SNP	FBgn0015609	CadN	0	INTRON	12	18	205	870384	2L_17653979_SNP	1	0	17653979	2.55920566292225e-05	0.0159118690637969	0.00365139533721228	0.348910450928019	0	0.191559609359813
2L_17672873_SNP	FBgn0015609	CadN	0	INTRON	9	13	205	870947	2L_17672873_SNP	1	0	17672873	4.5917661649608e-05	0.0146206943014976	0.00347263351931368	0.338475293942395	0	0.191559609359813
2L_2439094_SNP	FBgn0000490	dpp	0	INTRON	85	108	205	103151	2L_2439094_SNP	1	0	2439094	7.66244266354706e-06	0.01850948792874	0.0039788559158345	0.369342095730292	0	0.191559609359813
2L_3342443_SNP	FBgn0020445	E23	0	INTRON	26	35	205	147755	2L_3342443_SNP	1	0	3342443	3.10433006624324e-06	-0.0170654836901291	0.00350806540415808	0.383787322679061	0	0.191559609359813
2L_3548300_SNP	FBgn0024244	drm	219	DOWNSTREAM	78	102	205	160040	2L_3548300_SNP	1	0	3548300	4.76853282436377e-05	0.016704092260455	0.00397658701148826	0.337788041950994	0	0.191559609359813
2L_6298908_DEL	FBgn0053531	Ddr	0	INTRON	11	17	205	308000	2L_6298908_DEL	1	0	6298908	4.04273136376456e-05	-0.0144506549332035	0.0034060153967045	0.340780340294356	0	0.191559609359813
2R_10035249_SNP	FBgn0033897	Rcd1	519	DOWNSTREAM	14	20	205	325500	2R_10035249_SNP	2	0	10035249	4.62597367631064e-05	0.0159493478834021	0.00378991451692562	0.3383403845091	0	0.294479932042717
2R_12635486_SNP	FBgn0034152	Acp53C14a	79	DOWNSTREAM	62	78	205	442657	2R_12635486_SNP	2	0	12635486	4.16796453842209e-05	-0.0147748966464513	0.00348881407914917	0.340229782593668	0	0.294479932042717
2R_12635486_SNP	FBgn0034153	Acp53C14b	925	DOWNSTREAM	62	78	205	442657	2R_12635486_SNP	2	0	12635486	4.16796453842209e-05	-0.0147748966464513	0.00348881407914917	0.340229782593668	0	0.294479932042717
2R_17028291_SNP	FBgn0034590	Magi	0	INTRON	108	140	205	653623	2R_17028291_SNP	2	0	17028291	2.02524148207674e-05	-0.0151695935946875	0.00343525671167215	0.352986337929275	0	0.294479932042717
2R_18079911_SNP	FBgn0034709	Swim	0	INTRON	30	35	205	710735	2R_18079911_SNP	2	0	18079911	4.66741128057041e-05	-0.0145161413647329	0.00345122119483572	0.338178208105567	0	0.294479932042717
2R_18392082_SNP	FBgn0003175	px	0	INTRON	36	52	205	724583	2R_18392082_SNP	2	0	18392082	3.72963357417432e-05	0.014686006701346	0.00344489236756535	0.342230143030621	0	0.294479932042717
2R_3337441_SNP	FBgn0050502	fa2h	0	INTRON	8	13	205	68667	2R_3337441_SNP	2	0	3337441	3.51160371030554e-05	-0.0143216185606304	0.00334745938746409	0.343308866060173	0	0.294479932042717
2R_3337441_SNP	FBgn0033174	CG11125	521	DOWNSTREAM	8	13	205	68667	2R_3337441_SNP	2	0	3337441	3.51160371030554e-05	-0.0143216185606304	0.00334745938746409	0.343308866060173	0	0.294479932042717
2R_4625801_SNP	FBgn0027585	CG8740	0	INTRON	7	11	205	105688	2R_4625801_SNP	2	0	4625801	4.17350286186276e-05	-0.0159001181309597	0.00375481336372164	0.340205794718373	0	0.294479932042717
2R_4625801_SNP	FBgn0261267	CG42615	506	DOWNSTREAM	7	11	205	105688	2R_4625801_SNP	2	0	4625801	4.17350286186276e-05	-0.0159001181309597	0.00375481336372164	0.340205794718373	0	0.294479932042717
2R_4629748_SNP	FBgn0027585	CG8740	0	INTRON	12	15	205	105825	2R_4629748_SNP	2	0	4629748	2.81727973084857e-05	-0.0154129379864123	0.00355649495348339	0.347220631844917	0	0.294479932042717
2R_4629918_SNP	FBgn0027585	CG8740	0	INTRON	7	10	205	105833	2R_4629918_SNP	2	0	4629918	1.03690358832932e-05	-0.017189676472475	0.00375374396736037	0.364347032572153	0	0.294479932042717
2R_4629920_SNP	FBgn0027585	CG8740	0	INTRON	7	10	205	105834	2R_4629920_SNP	2	0	4629920	8.92077815997605e-06	-0.0171877076816186	0.0037238682207745	0.366841653330172	0	0.294479932042717
2R_4630445_SNP	FBgn0027585	CG8740	0	INTRON	7	11	205	105847	2R_4630445_SNP	2	0	4630445	2.1340527230744e-05	-0.0163606653669994	0.00371588007236433	0.352079659907413	0	0.294479932042717
2R_5594511_SNP	FBgn0033439	CG1773	0	INTRON	71	92	205	133573	2R_5594511_SNP	2	0	5594511	1.60508557743034e-05	0.0160658476361829	0.00359167033698039	0.356981413784436	0	0.294479932042717
2R_5594511_SNP	FBgn0033440	CG10459	530	UPSTREAM	71	92	205	133573	2R_5594511_SNP	2	0	5594511	1.60508557743034e-05	0.0160658476361829	0.00359167033698039	0.356981413784436	0	0.294479932042717
2R_5594511_SNP	FBgn0260474	CG30002	859	DOWNSTREAM	71	92	205	133573	2R_5594511_SNP	2	0	5594511	1.60508557743034e-05	0.0160658476361829	0.00359167033698039	0.356981413784436	0	0.294479932042717
2R_6385655_SNP	FBgn0005630	lola	0	INTRON	6	8	205	162401	2R_6385655_SNP	2	0	6385655	2.56567432409009e-05	-0.0148337548460433	0.00340448568497037	0.348866173603281	0	0.294479932042717
2R_6385723_SNP	FBgn0005630	lola	0	INTRON	6	9	205	162405	2R_6385723_SNP	2	0	6385723	2.48765108586914e-05	-0.014929394022551	0.00342039232985911	0.349407384176641	0	0.294479932042717
3L_11791350_SNP	FBgn0004381	Klp68D	0	NON_SYNONYMOUS_CODING	55	70	205	583531	3L_11791350_SNP	3	0	11791350	3.69240975513531e-05	0.0159957651013105	0.00374988903062463	0.342410047420862	0	0.240479468160229
3L_13381571_SNP	FBgn0036354	Poc1	0	SYNONYMOUS_CODING	12	16	205	666600	3L_13381571_SNP	3	0	13381571	3.67492278682953e-05	-0.014399197826941	0.00337465538593869	0.342495151353385	0	0.240479468160229
3L_13446760_SNP	FBgn0036368	CG10738	0	INTRON	76	99	205	669152	3L_13446760_SNP	3	0	13446760	7.00788599205083e-06	0.0164374760304647	0.00351734800007441	0.370800876018491	0	0.240479468160229
3L_13447852_SNP	FBgn0036368	CG10738	0	INTRON	88	117	205	669202	3L_13447852_SNP	3	0	13447852	4.67182295843612e-05	0.0145785493985791	0.00346625764687621	0.338161021506276	0	0.240479468160229
3L_14967194_SNP	FBgn0040296	Ocho	754	UPSTREAM	26	33	205	735894	3L_14967194_SNP	3	0	14967194	1.91185815072893e-05	-0.0169387968032688	0.00382358592147908	0.353981284933909	0	0.240479468160229
3L_14967194_SNP	FBgn0000216	Brd	896	DOWNSTREAM	26	33	205	735894	3L_14967194_SNP	3	0	14967194	1.91185815072893e-05	-0.0169387968032688	0.00382358592147908	0.353981284933909	0	0.240479468160229
3L_14967226_SNP	FBgn0040296	Ocho	722	UPSTREAM	24	30	205	735899	3L_14967226_SNP	3	0	14967226	2.02319715059568e-05	-0.0166512464107973	0.00377057380423285	0.353003807681781	0	0.240479468160229
3L_14967226_SNP	FBgn0000216	Brd	928	DOWNSTREAM	24	30	205	735899	3L_14967226_SNP	3	0	14967226	2.02319715059568e-05	-0.0166512464107973	0.00377057380423285	0.353003807681781	0	0.240479468160229
3L_14967255_SNP	FBgn0040296	Ocho	693	UPSTREAM	31	39	205	735903	3L_14967255_SNP	3	0	14967255	6.55060176654432e-06	-0.017122226093138	0.00365133180961812	0.371898590359323	0	0.240479468160229
3L_14967255_SNP	FBgn0000216	Brd	957	DOWNSTREAM	31	39	205	735903	3L_14967255_SNP	3	0	14967255	6.55060176654432e-06	-0.017122226093138	0.00365133180961812	0.371898590359323	0	0.240479468160229
3L_15627346_SNP	FBgn0259236	comm3	0	INTRON	15	20	205	763745	3L_15627346_SNP	3	0	15627346	7.97567519479654e-06	-0.0159908621168865	0.00344453491983982	0.368685251165925	0	0.240479468160229
3L_16255915_SNP	FBgn0036585	CG13071	0	UTR_5_PRIME	55	67	205	789575	3L_16255915_SNP	3	0	16255915	1.84586702964781e-05	-0.0155792462047553	0.00350983485862089	0.354586265451757	0	0.240479468160229
3L_16255915_SNP	FBgn0036586	CG13070	528	UPSTREAM	55	67	205	789575	3L_16255915_SNP	3	0	16255915	1.84586702964781e-05	-0.0155792462047553	0.00350983485862089	0.354586265451757	0	0.240479468160229
3L_7716969_SNP	FBgn0035812	CG7457	0	NON_SYNONYMOUS_CODING	60	79	205	370727	3L_7716969_SNP	3	0	7716969	4.11519284098857e-06	-0.0166348925480908	0.00346636730548636	0.379354238163955	0	0.240479468160229
3L_8506225_SNP	FBgn0035903	CG6765	0	INTRON	14	15	205	406773	3L_8506225_SNP	3	0	8506225	1.92038939156623e-05	0.0149897921189202	0.00338447722009439	0.353904514412733	0	0.240479468160229
3L_8506225_SNP	FBgn0035901	CG6745	118	DOWNSTREAM	14	15	205	406773	3L_8506225_SNP	3	0	8506225	1.92038939156623e-05	0.0149897921189202	0.00338447722009439	0.353904514412733	0	0.240479468160229
3L_8506225_SNP	FBgn0035902	CG6683	749	DOWNSTREAM	14	15	205	406773	3L_8506225_SNP	3	0	8506225	1.92038939156623e-05	0.0149897921189202	0.00338447722009439	0.353904514412733	0	0.240479468160229
3R_12065963_SNP	FBgn0040071	tara	0	INTRON	99	129	205	322927	3R_12065963_SNP	4	0	12065963	2.33803252611478e-05	0.0164361508745179	0.00375232770797834	0.350491452058373	0	0.515477010156247
3R_14730504_SNP	FBgn0038658	CG14292	151	DOWNSTREAM	62	75	205	436810	3R_14730504_SNP	4	0	14730504	2.83633758125132e-05	0.0160283872007879	0.0036999493496922	0.347101688101585	0	0.515477010156247
3R_14730552_SNP	FBgn0038658	CG14292	103	DOWNSTREAM	49	61	205	436811	3R_14730552_SNP	4	0	14730552	4.65341724280507e-05	0.0157721456622592	0.00374915323826668	0.338232825738203	0	0.515477010156247
3R_19765339_SNP	FBgn0001098	Gdh	0	INTRON	107	136	205	646944	3R_19765339_SNP	4	0	19765339	2.34895280685667e-05	-0.0154243180356265	0.00352226048562733	0.350410151147595	0	0.515477010156247
3R_26677053_SNP	FBgn0003720	tll	984	UPSTREAM	14	20	205	950658	3R_26677053_SNP	4	0	26677053	4.9728037495884e-06	0.0169959718323315	0.00357471622921829	0.376340429606194	0	0.515477010156247
3R_26677056_DEL	FBgn0003720	tll	980	UPSTREAM	15	21	205	950659	3R_26677056_DEL	4	0	26677056	6.90745464076261e-06	0.016816314140027	0.00359576879800157	0.37103603141624	0	0.515477010156247
3R_26677069_SNP	FBgn0003720	tll	968	UPSTREAM	14	20	205	950661	3R_26677069_SNP	4	0	26677069	1.21738588843514e-05	0.0163363931066344	0.00359792055203118	0.361663050407066	0	0.515477010156247
3R_26677071_SNP	FBgn0003720	tll	966	UPSTREAM	16	22	205	950662	3R_26677071_SNP	4	0	26677071	3.65420133489341e-06	0.0173804421091558	0.00360089396653942	0.381230569952151	0	0.515477010156247
3R_26677072_SNP	FBgn0003720	tll	965	UPSTREAM	16	22	205	950663	3R_26677072_SNP	4	0	26677072	3.65420133489341e-06	0.0173804421091558	0.00360089396653942	0.381230569952151	0	0.515477010156247
3R_26677077_MNP	FBgn0003720	tll	960	UPSTREAM	16	22	205	950664	3R_26677077_MNP	4	0	26677077	4.28480037464126e-06	0.0172586607218853	0.00360345151404624	0.378713732069571	0	0.515477010156247
3R_26677082_SNP	FBgn0003720	tll	955	UPSTREAM	15	21	205	950665	3R_26677082_SNP	4	0	26677082	5.95975843042245e-06	0.0169203952747027	0.00359111744191548	0.373429608660908	0	0.515477010156247
3R_26677087_SNP	FBgn0003720	tll	950	UPSTREAM	15	21	205	950666	3R_26677087_SNP	4	0	26677087	7.53218448338719e-06	0.0164604870984886	0.00353528517800257	0.369622749321527	0	0.515477010156247
3R_26677092_SNP	FBgn0003720	tll	945	UPSTREAM	15	21	205	950668	3R_26677092_SNP	4	0	26677092	6.14549286890215e-06	0.0166027048947468	0.0035291397074918	0.372933402337607	0	0.515477010156247
3R_26677094_SNP	FBgn0003720	tll	943	UPSTREAM	15	21	205	950669	3R_26677094_SNP	4	0	26677094	1.05904254290547e-05	0.0160253599374708	0.00350339158214638	0.36399504591866	0	0.515477010156247
3R_26677188_SNP	FBgn0003720	tll	849	UPSTREAM	15	21	205	950684	3R_26677188_SNP	4	0	26677188	1.14997991347549e-05	0.0157073597997035	0.00344889322104656	0.362618550849376	0	0.515477010156247
3R_26677191_SNP	FBgn0003720	tll	846	UPSTREAM	15	21	205	950685	3R_26677191_SNP	4	0	26677191	1.27212204515224e-05	0.0155731479755939	0.00343791125024596	0.360923200778843	0	0.515477010156247
3R_26677197_SNP	FBgn0003720	tll	840	UPSTREAM	15	21	205	950686	3R_26677197_SNP	4	0	26677197	1.34968600488676e-05	0.0163433234344257	0.00361944058265344	0.359924666912649	0	0.515477010156247
3R_26677200_SNP	FBgn0003720	tll	837	UPSTREAM	14	20	205	950687	3R_26677200_SNP	4	0	26677200	4.05282585194596e-05	0.0150152369010768	0.0035396156264877	0.340735373417177	0	0.515477010156247
3R_26677208_DEL	FBgn0003720	tll	828	UPSTREAM	23	31	205	950688	3R_26677208_DEL	4	0	26677208	1.60603736637048e-05	0.0160862516837365	0.00359634866816246	0.356971296004273	0	0.515477010156247
3R_26677213_SNP	FBgn0003720	tll	824	UPSTREAM	22	29	205	950689	3R_26677213_SNP	4	0	26677213	1.47618323438353e-05	0.0162158863513504	0.00360868470780232	0.35840682007808	0	0.515477010156247
3R_26677310_SNP	FBgn0003720	tll	727	UPSTREAM	23	32	205	950701	3R_26677310_SNP	4	0	26677310	3.64115656904511e-05	0.0164635834918402	0.00385636314201784	0.342660563076452	0	0.515477010156247
X_14232609_SNP	FBgn0052600	dpr8	0	INTRON	11	15	205	381298	X_14232609_SNP	5	0	14232609	2.09562920347377e-06	0.0160380294341335	0.00323654055427721	0.389860965215579	0	0.248616959704195
X_14232626_SNP	FBgn0052600	dpr8	0	INTRON	12	15	205	381301	X_14232626_SNP	5	0	14232626	9.83507108251687e-07	0.0168666676461608	0.00328978876494945	0.401224049108518	0	0.248616959704195
X_8656763_SNP	FBgn0026411	Lim1	0	INTRON	84	109	205	218663	X_8656763_SNP	5	0	8656763	4.80514269795843e-05	0.0149040422318509	0.0035497187387144	0.3376486973918	0	0.248616959704195
X_8731906_SNP	FBgn0030065	CG12075	450	UPSTREAM	53	65	205	221539	X_8731906_SNP	5	0	8731906	1.65853210967202e-05	-0.0157635162689768	0.00353042143478076	0.356421834559542	0	0.248616959704195
X_8868273_SNP	FBgn0264384	CR43836	0	INTRON	45	57	205	226316	X_8868273_SNP	5	0	8868273	1.65012546925611e-05	0.0163667361588453	0.0036644962082772	0.356508714441102	0	0.248616959704195
X_8868273_SNP	FBgn0030073	CG10962	0	UTR_5_PRIME	45	57	205	226316	X_8868273_SNP	5	0	8868273	1.65012546925611e-05	0.0163667361588453	0.0036644962082772	0.356508714441102	0	0.248616959704195
X_8868273_SNP	FBgn0261549	rdgA	0	INTRON	45	57	205	226316	X_8868273_SNP	5	0	8868273	1.65012546925611e-05	0.0163667361588453	0.0036644962082772	0.356508714441102	0	0.248616959704195
2L_17662121_SNP	FBgn0015609	CadN	0	SYNONYMOUS_CODING	12	15	205	870617	2L_17662121_SNP	1	0	17662121	4.4604976838838e-05	0.0153173778348759	0.00363172296502479	0.339001899525302	0	0.191559609359813
3L_13381571_SNP	FBgn0036354	Poc1	0	SYNONYMOUS_CODING	12	16	205	666600	3L_13381571_SNP	3	0	13381571	3.67492278682953e-05	-0.014399197826941	0.00337465538593869	0.342495151353385	0	0.240479468160229
2L_17662031_SNP	FBgn0015609	CadN	0	SYNONYMOUS_CODING	13	17	205	870614	2L_17662031_SNP	1	0	17662031	3.93143570268768e-05	0.0151124816439147	0.00355606889534747	0.341283226769907	0	0.191559609359813
2L_17662043_SNP	FBgn0015609	CadN	0	SYNONYMOUS_CODING	14	18	205	870615	2L_17662043_SNP	1	0	17662043	1.01202939731675e-05	0.0163608386204517	0.00356818520580437	0.364751075337585	0	0.191559609359813
2R_18013608_SNP	FBgn0034697	GM130	0	SYNONYMOUS_CODING	13	19	205	707136	2R_18013608_SNP	2	0	18013608	3.6436740767146e-05	0.0152205992629079	0.00356535752321031	0.342648180890158	0	0.294479932042717
3R_26678500_SNP	FBgn0003720	tll	0	SYNONYMOUS_CODING	13	19	205	950776	3R_26678500_SNP	4	0	26678500	4.28969451550432e-05	0.0145062618746675	0.00343131557357176	0.339709305677058	0	0.515477010156247
3R_26678569_SNP	FBgn0003720	tll	0	SYNONYMOUS_CODING	19	28	205	950778	3R_26678569_SNP	4	0	26678569	2.72210962784892e-06	0.0168027694580373	0.0034325873592682	0.385831718039684	0	0.515477010156247
3R_26678587_SNP	FBgn0003720	tll	0	SYNONYMOUS_CODING	20	29	205	950779	3R_26678587_SNP	4	0	26678587	5.25378668275775e-06	0.0162616880019441	0.00342962169841068	0.375459672364255	0	0.515477010156247
3R_19633038_SNP	FBgn0053111	CG33111	0	SYNONYMOUS_CODING	29	35	205	642333	3R_19633038_SNP	4	0	19633038	2.23602136327457e-05	0.0173645352762709	0.00395427396572149	0.351268669583769	0	0.515477010156247
X_6542832_SNP	FBgn0029881	pigs	0	SYNONYMOUS_CODING	29	42	205	159782	X_6542832_SNP	5	0	6542832	2.8441000126857e-05	0.0160415431721248	0.00370357134834788	0.347053456482548	0	0.248616959704195
X_6542829_SNP	FBgn0029881	pigs	0	SYNONYMOUS_CODING	32	45	205	159781	X_6542829_SNP	5	0	6542829	2.35747511385259e-05	0.0158206213337681	0.00361350230740072	0.350346949740294	0	0.248616959704195
2L_10700760_SNP	FBgn0023496	Lip1	0	SYNONYMOUS_CODING	36	50	205	542893	2L_10700760_SNP	1	0	10700760	1.85661262659897e-06	0.0193744573515318	0.00388808818355395	0.391708634038619	0	0.191559609359813
3L_7716926_SNP	FBgn0035812	CG7457	0	SYNONYMOUS_CODING	63	82	205	370725	3L_7716926_SNP	3	0	7716926	1.95848041687641e-05	-0.0155330389442038	0.00351097717742486	0.353565615057793	0	0.240479468160229
sid_index	SNP	Chr	GenDist	ChrPos	PValue	SnpWeight	SnpWeightSE	SnpFractVarExpl	Mixing	Nullh2	maf
336763	3L_7050540_SNP	3	0	7050540	2.04758643416345e-05	0.0161077001558382	0.00364993977129286	0.352796465218529	0	0.240479468160229	0.105
806784	2L_16205117_SNP	1	0	16205117	2.79409329718752e-05	-0.0162458832558451	0.00374690648713654	0.347366367161447	0	0.191559609359813	0.448087
83059	X_3968110_SNP	5	0	3968110	2.20560145799456e-05	-0.0149474406039305	0.00340121830569456	0.351506902710814	0	0.248616959704195	0.255
950643	3R_26676810_SNP	4	0	26676810	3.77851406640992e-05	0.014741602572719	0.00346060974639046	0.341996444644054	0	0.515477010156247	0.115
133269	2R_5585533_SNP	2	0	5585533	4.7104079031488e-05	0.0141817580678581	0.00337360066652346	0.338011351203684	0	0.294479932042717	0.0555556
366670	2R_10966000_SNP	2	0	10966000	2.04129489696811e-05	0.0172642964279163	0.00391134533169091	0.352849728449363	0	0.294479932042717	0.0994764
641078	3L_12873492_SNP	3	0	12873492	3.13807222795558e-05	-0.0151423587140995	0.003516007615158	0.3453123270897	0	0.240479468160229	0.458763
235411	2R_8020976_SNP	2	0	8020976	4.65224241137799e-05	0.0148598065410758	0.00353222946902746	0.338237418018707	0	0.294479932042717	0.0547264
950622	3R_26676391_SNP	4	0	26676391	1.98947750157569e-05	0.0152916761241555	0.003459453782995	0.353294381620974	0	0.515477010156247	0.125
950758	3R_26678074_SNP	4	0	26678074	1.33648759402754e-05	0.0155937764613589	0.00345161440677218	0.360090692112788	0	0.515477010156247	0.0909091
264911	2L_5507344_SNP	1	0	5507344	1.49638372459041e-05	0.016851914284686	0.00375300083086541	0.358175868873088	0	0.191559609359813	0.414508
254430	X_9826784_SNP	5	0	9826784	3.5914288914898e-05	-0.0153124036906529	0.00358379699958743	0.342906807317086	0	0.248616959704195	0.266332
950648	3R_26676943_SNP	4	0	26676943	7.67899649749644e-06	0.0158417253946915	0.00340576293133668	0.36930675252712	0	0.515477010156247	0.113861
217249	X_8621385_SNP	5	0	8621385	1.31022801837624e-05	-0.0157989470005207	0.00349329344423205	0.360425667577416	0	0.248616959704195	0.415842
41085	3L_1121502_SNP	3	0	1121502	7.01192161898947e-06	-0.0161607834882324	0.00345824182589533	0.370791493545038	0	0.240479468160229	0.487562
722607	2R_18351438_SNP	2	0	18351438	3.23451374259694e-05	0.0151702712951976	0.00352872773048766	0.344774433080049	0	0.294479932042717	0.0696517
655360	3L_13175329_SNP	3	0	13175329	4.77444684704238e-05	-0.0145608998170316	0.00346663878185646	0.337765464204771	0	0.240479468160229	0.0985222
823678	3R_23970095_SNP	4	0	23970095	2.43169381999271e-05	0.0164596363163009	0.00376608936303068	0.349805457156764	0	0.515477010156247	0.313514
289921	X_11112326_SNP	5	0	11112326	1.51453062752424e-05	-0.0151693851951876	0.00338051272711959	0.357970889359767	0	0.248616959704195	0.148515
366687	2R_10966328_SNP	2	0	10966328	2.03833863153499e-05	0.0160668280327158	0.00363975510314832	0.352874809161343	0	0.294479932042717	0.0761421
22203	2R_1244486_DEL	2	0	1244486	7.20202443454224e-06	-0.0171532530924153	0.00367563297799727	0.370355209138583	0	0.294479932042717	0.131429

## Sheet: FastEpistasis_Cve_EDD
1_ID	1_FlybaseID	1_GeneSymbol		1_Position	1_Type	1_NbOfLinesForMutationInEpistasis	1_NbOfLinesForMutationInDB	1_TotalNbOfLinesinDB	1_CHR	1_SNP	N_SIG	N_TOT	PROP	CHISQ	2_CHR	2_SNP	2_ID	2_FlybaseID	2_GeneSymbol	2_Position	2_Type	2_NbOfLinesForMutationInEpistasis	2_NbOfLinesForMutationInDB	2_TotalNbOfLinesinDB
X_13918963_SNP	FBgn0011980	tRNA:S774:12Ec	FBgn0011980	179	DOWNSTREAM	5	9	205	5	X_13918963_SNP	13	789838	0.00002	7.86482	3	3L_8138282_SNP	3L_8138282_SNP	FBgn0035844	CG13676	0	INTRON	7	10	205
3L_7742695_SNP	FBgn0035816	CG13685	FBgn0035816	0	UTR_3_PRIME	8	10	205	3	3L_7742695_SNP	10	1001540	0.00001	8.60722	2	2R_3236771_SNP	2R_3236771_SNP	FBgn0033159	Dscam	0	INTRON	8	10	205
2L_8629174_SNP	FBgn0011259	Sema-1a	FBgn0011259	0	INTRON	7	11	205	1	2L_8629174_SNP	0	945722	0.00000	6.05064	2	2R_13172961_SNP	2R_13172961_SNP	FBgn0261642	mbl	0	INTRON	7	10	205
X_16161197_SNP	FBgn0040207	kat80	FBgn0040207	0	UTR_3_PRIME	40	57	205	5	X_16161197_SNP	26258	1336878	0.01964	49.72062	1	2L_9177953_SNP	2L_9177953_SNP	FBgn0041092	tai	0	INTRON	9	10	205
3L_18246742_SNP	FBgn0036783	CheA75a	FBgn0036783	796	DOWNSTREAM	43	59	205	3	3L_18246742_SNP	9419	1348198	0.00699	21.41875	3	3L_13541895_SNP	3L_13541895_SNP	FBgn0264001	bru-3	0	INTRON	9	10	205
X_11205540_SNP	FBgn0083979	Ir10a	FBgn0083979	299	UPSTREAM	17	24	205	5	X_11205540_SNP	4750	1243951	0.00382	15.46187	5	X_10813564_SNP	X_10813564_SNP	FBgn0264502	CG43901	0	INTRON	6	11	205
2L_4332788_SNP	FBgn0028482	CG16857	FBgn0028482	958	DOWNSTREAM	44	54	205	1	2L_4332788_SNP	4574	1348649	0.00339	19.45794	2	2R_11815919_SNP	2R_11815919_SNP	FBgn0034049	bdg	0	INTRON	8	11	205
2L_3268761_SNP	FBgn0031513	CG3347	FBgn0031513	676	UPSTREAM	146	189	205	1	2L_3268761_SNP	125674	876095	0.14345	24.56422	4	3R_18443580_SNP	3R_18443580_SNP	FBgn0051161	CG31161	0	INTRON	10	13	205
3L_6065766_SNP	FBgn0035673	CG6602	FBgn0035673	0	NON_SYNONYMOUS_CODING	26	35	205	3	3L_6065766_SNP	25620	1298592	0.01973	24.09447	4	3R_22779369_SNP	3R_22779369_SNP	FBgn0039464	CG6330	0	INTRON	8	14	205
X_19537335_SNP	FBgn0031049	Sec61gamma	FBgn0031049	30	UPSTREAM	37	45	205	5	X_19537335_SNP	7672	1335343	0.00575	21.90353	1	2L_8234122_SNP	2L_8234122_SNP	FBgn0032006	Pvr	0	INTRON	13	15	205
2R_6133150_SNP	FBgn0005619	Hdc	FBgn0005619	0	UTR_3_PRIME	7	8	205	2	2R_6133150_SNP	2967	899082	0.00330	13.87008	1	2L_9131351_SNP	2L_9131351_SNP	FBgn0052982	CG32982	0	INTRON	14	16	205
2R_6133149_SNP	FBgn0005619	Hdc	FBgn0005619	0	UTR_3_PRIME	7	8	205	2	2R_6133149_SNP	3009	899082	0.00335	13.87008	1	2L_9131351_SNP	2L_9131351_SNP	FBgn0052982	CG32982	0	INTRON	14	16	205
X_19537322_SNP	FBgn0031049	Sec61gamma	FBgn0031049	43	UPSTREAM	36	44	205	5	X_19537322_SNP	11346	1335172	0.00850	26.83874	1	2L_4855911_SNP	2L_4855911_SNP	FBgn0051660	pog	0	INTRON	13	18	205
X_16582343_SNP	FBgn0259923	2004-09-01	FBgn0259923	0	INTRON	11	15	205	5	X_16582343_SNP	30013	1110039	0.02704	20.36752	2	2R_3049355_SNP	2R_3049355_SNP	FBgn0003090	pk	0	INTRON	13	20	205
X_16489527_SNP	FBgn0015374	crl	FBgn0015374	78	DOWNSTREAM	113	145	205	5	X_16489527_SNP	3721	1350682	0.00275	19.05052	4	3R_14587218_SNP	3R_14587218_SNP	FBgn0038652	CG7720	0	INTRON	17	24	205
X_16489518_SNP	FBgn0015374	crl	FBgn0015374	69	DOWNSTREAM	115	146	205	5	X_16489518_SNP	3649	1349521	0.00270	19.00089	4	3R_14587218_SNP	3R_14587218_SNP	FBgn0038652	CG7720	0	INTRON	17	24	205
X_19537303_SNP	FBgn0031049	Sec61gamma	FBgn0031049	62	UPSTREAM	41	50	205	5	X_19537303_SNP	10985	1342680	0.00818	29.67320	4	3R_12737769_SNP	3R_12737769_SNP	FBgn0264857	iab-8	0	INTRON	18	25	205
3R_20229750_SNP	FBgn0000036	nAcRalpha-96Aa	FBgn0000036	0	INTRON	92	123	205	4	3R_20229750_SNP	8895	1355167	0.00656	22.27958	2	2R_11406672_SNP	2R_11406672_SNP	FBgn0019968	Khc-73	0	NON_SYNONYMOUS_CODING	20	25	205
3R_20229841_SNP	FBgn0000036	nAcRalpha-96Aa	FBgn0000036	0	INTRON	95	129	205	4	3R_20229841_SNP	8442	1355268	0.00623	22.55953	2	2R_11406672_SNP	2R_11406672_SNP	FBgn0019968	Khc-73	0	NON_SYNONYMOUS_CODING	20	25	205
X_12903619_SNP	FBgn0261379	rad	FBgn0261379	0	INTRON	12	15	205	5	X_12903619_SNP	10232	1141352	0.00896	16.35987	3	3L_5423554_SNP	3L_5423554_SNP	FBgn0085420	CG34391	0	INTRON	20	28	205
2L_6422252_SNP	FBgn0011722	Tig	FBgn0011722	0	INTRON	115	153	205	1	2L_6422252_SNP	3514	1325998	0.00265	36.86845	2	2R_11857739_SNP	2R_11857739_SNP	FBgn0265045	Strn-Mlck	0	NON_SYNONYMOUS_CODING	22	29	205
3L_2442704_SNP	FBgn0261551	CG42669	FBgn0261551	0	INTRON	60	75	205	3	3L_2442704_SNP	13921	1358915	0.01024	35.63375	4	3R_11139636_SNP	3R_11139636_SNP	FBgn0004117	Tm2	0	INTRON	24	31	205
X_11151581_SNP	FBgn0261569	CG42683	FBgn0261569	0	INTRON	54	72	205	5	X_11151581_SNP	800760	16986	47.14235	0.00000	4	3R_14172513_SNP	3R_14172513_SNP	FBgn0038606	CG15803	0	INTRON	25	33	205
3L_14319289_SNP	FBgn0001085	fz	FBgn0001085	0	INTRON	27	33	205	3	3L_14319289_SNP	4642	1311114	0.00354	15.49174	4	3R_15775292_SNP	3R_15775292_SNP	FBgn0038755	Hs6st	0	INTRON	29	34	205
3R_20229866_SNP	FBgn0000036	nAcRalpha-96Aa	FBgn0000036	0	INTRON	72	99	205	4	3R_20229866_SNP	14140	1359915	0.01040	25.49423	2	2R_5685045_SNP	2R_5685045_SNP	FBgn0033443	CG1698	0	SYNONYMOUS_CODING	29	37	205
3R_7971206_SNP	FBgn0037993	dpr15	FBgn0037993	0	INTRON	24	34	205	4	3R_7971206_SNP	17522	1289264	0.01359	22.72655	1	2L_10917950_SNP	2L_10917950_SNP	FBgn0261871	dpr2	0	NON_SYNONYMOUS_CODING	30	38	205
3R_22428056_SNP	FBgn0263289	scrib	FBgn0263289	0	INTRON	31	42	205	4	3R_22428056_SNP	2864	1322591	0.00217	18.89545	3	3L_13916315_SNP	3L_13916315_SNP	FBgn0026376	Rgl	0	INTRON	31	38	205
X_6844423_SNP	FBgn0029922	CG14431	FBgn0029922	0	INTRON	13	15	205	5	X_6844423_SNP	1090	1135711	0.00096	14.34130	3	3L_2104988_SNP	3L_2104988_SNP	FBgn0086906	sls	0	SYNONYMOUS_CODING	30	39	205
X_10596389_SNP	FBgn0052677	X11Lbeta	FBgn0052677	0	INTRON	21	33	205	5	X_10596389_SNP	15174	1259178	0.01205	20.99546	5	X_11044471_SNP	X_11044471_SNP	FBgn0030274	Lint-1	0	INTRON	26	40	205
3R_21330222_SNP	FBgn0039342	CG5107	FBgn0039342	713	UPSTREAM	118	153	205	4	3R_21330222_SNP	23865	1327578	0.01798	25.03181	4	3R_14048150_SNP	3R_14048150_SNP	FBgn0038584	mTerf5	0	SYNONYMOUS_CODING	36	42	205
3R_20229812_SNP	FBgn0000036	nAcRalpha-96Aa	FBgn0000036	0	INTRON	69	94	205	4	3R_20229812_SNP	15310	1359993	0.01126	25.30132	2	2R_13864871_SNP	2R_13864871_SNP	FBgn0034286	dpr13	0	INTRON	33	44	205
2R_9939931_SNP	FBgn0002643	mam	FBgn0002643	0	INTRON	16	22	205	2	2R_9939931_SNP	5	1227787	0.00000	8.72568	1	2L_16979805_SNP	2L_16979805_SNP	FBgn0053179	beat-IIIb	0	INTRON	40	50	205
3L_6065769_SNP	FBgn0035673	CG6602	FBgn0035673	0	NON_SYNONYMOUS_CODING	25	34	205	3	3L_6065769_SNP	30023	1292914	0.02322	23.81855	2	2R_1739851_SNP	2R_1739851_SNP	FBgn0085414	dpr12	0	INTRON	38	53	205
3R_13653245_SNP	FBgn0261649	tinc	FBgn0261649	0	INTRON	36	47	205	4	3R_13653245_SNP	6157	1334297	0.00461	18.95896	4	3R_4756211_SNP	3R_4756211_SNP	FBgn0262614	pyd	0	INTRON	42	55	205
3L_8354648_SNP	FBgn0001248	Idh	FBgn0001248	642	UPSTREAM	25	31	205	3	3L_8354648_SNP	18546	1298252	0.01429	26.52873	2	2R_9231166_SNP	2R_9231166_SNP	FBgn0265104	CG44206	0	INTRON	46	56	205
3L_8354457_SNP	FBgn0001248	Idh	FBgn0001248	451	UPSTREAM	33	46	205	3	3L_8354457_SNP	14254	1329056	0.01072	22.47853	2	2R_12745937_SNP	2R_12745937_SNP	FBgn0026533	Dek	0	SYNONYMOUS_CODING	46	56	205
2R_9939930_SNP	FBgn0002643	mam	FBgn0002643	0	INTRON	17	22	205	2	2R_9939930_SNP	9	1239676	0.00001	8.66768	5	X_9451027_SNP	X_9451027_SNP	FBgn0030137	CG15317	450	UPSTREAM	40	57	205
X_11407530_SNP	FBgn0052666	Drak	FBgn0052666	0	INTRON	41	55	205	5	X_11407530_SNP	22633	1344518	0.01683	28.85021	4	3R_9223715_SNP	3R_9223715_SNP	FBgn0038148	CG14377	0	NON_SYNONYMOUS_CODING	52	65	205
X_11407457_SNP	FBgn0052666	Drak	FBgn0052666	0	INTRON	41	56	205	5	X_11407457_SNP	19192	1343109	0.01429	28.30843	4	3R_9223715_SNP	3R_9223715_SNP	FBgn0038148	CG14377	0	NON_SYNONYMOUS_CODING	52	65	205
2L_15522241_SNP	FBgn0264261	CR43761	FBgn0264261	197	UPSTREAM	34	45	205	1	2L_15522241_SNP	3083	1329599	0.00232	18.65228	1	2L_2962546_SNP	2L_2962546_SNP	FBgn0010263	Rbp9	0	INTRON	53	68	205
X_16483632_SNP	FBgn0015615	Cap	FBgn0015615	0	INTRON	59	75	205	5	X_16483632_SNP	13923	1358756	0.01025	24.81515	2	2R_16997624_SNP	2R_16997624_SNP	FBgn0015721	king-tubby	0	INTRON	54	71	205
2R_12486076_SNP	FBgn0034143	CG8303	FBgn0034143	0	INTRON	24	27	205	2	2R_12486076_SNP	13038	1278962	0.01019	19.83718	3	3L_4899168_SNP	3L_4899168_SNP	FBgn0035583	CG13704	0	INTRON	58	74	205
X_16483617_SNP	FBgn0015615	Cap	FBgn0015615	0	INTRON	58	72	205	5	X_16483617_SNP	14043	1358373	0.01034	25.98703	1	2L_2680842_SNP	2L_2680842_SNP	FBgn0051690	CG31690	0	INTRON	61	75	205
X_16489513_SNP	FBgn0015374	crl	FBgn0015374	64	DOWNSTREAM	112	144	205	5	X_16489513_SNP	3821	1349511	0.00283	19.89055	2	2R_7485518_SNP	2R_7485518_SNP	FBgn0033636	tou	0	INTRON	71	87	205
3R_27269205_SNP	FBgn0261988	Gprk2	FBgn0261988	0	INTRON	19	24	205	4	3R_27269205_SNP	18175	1239921	0.01466	21.02012	2	2R_6150815_SNP	2R_6150815_SNP	FBgn0050009	CR30009	0	EXON	74	91	205
3R_4270844_SNP	FBgn0263416	CG43462	FBgn0263416	0	INTRON	61	75	205	4	3R_4270844_SNP	17058	1359205	0.01255	26.17237	3	3L_19089445_SNP	3L_19089445_SNP	FBgn0036848	CG10424	54	DOWNSTREAM	75	98	205
3R_27276975_SNP	FBgn0261988	Gprk2	FBgn0261988	0	INTRON	75	96	205	4	3R_27276975_SNP	22838	1357866	0.01682	29.20654	4	3R_21310795_SNP	3R_21310795_SNP	FBgn0039339	CG5116	0	SYNONYMOUS_CODING	78	102	205
3R_12934687_SNP	FBgn0014141	cher	FBgn0014141	0	INTRON	30	36	205	4	3R_12934687_SNP	2943	1312340	0.00224	17.59534	3	3L_7865977_SNP	3L_7865977_SNP	FBgn0052365	CG32365	0	INTRON	92	121	205
2R_6127440_SNP	FBgn0005619	Hdc	FBgn0005619	0	INTRON	10	12	205	2	2R_6127440_SNP	362316	3960	91.49394	15.04577	1	2L_3182982_SNP	2L_3182982_SNP	FBgn0085422	CG34393	0	INTRON	103	131	205
3R_12059730_SNP	FBgn0040071	tara	FBgn0040071	0	INTRON	40	61	205	4	3R_12059730_SNP	12079	1342436	0.00900	25.30797	1	2L_14841783_SNP	2L_14841783_SNP	FBgn0264349	CR43805	0	INTRON	118	152	205
3R_12509505_SNP	FBgn0003944	Ubx	FBgn0003944	0	INTRON	32	40	205	4	3R_12509505_SNP	6600	1324640	0.00498	24.89631	2	2R_17789814_SNP	2R_17789814_SNP	FBgn0085397	Fili	0	INTRON	119	155	205
3L_8354448_SNP	FBgn0001248	Idh	FBgn0001248	442	UPSTREAM	29	41	205	3	3L_8354448_SNP	23151	1315430	0.01760	24.36824	3	3L_19657614_SNP	3L_19657614_SNP	FBgn0036899	tey	410	UPSTREAM	141	182	205

## Sheet: FastEpistasis_Cve_DI
1_ID	1_FlybaseID	1_GeneSymbol		1_Position	1_Type	1_NbOfLinesForMutationInEpistasis	1_NbOfLinesForMutationInDB	1_TotalNbOfLinesinDB	1_CHR	1_SNP	N_SIG	N_TOT	PROP	CHISQ	2_CHR	2_SNP	2_ID	2_FlybaseID	2_GeneSymbol	2_Position	2_Type	2_NbOfLinesForMutationInEpistasis	2_NbOfLinesForMutationInDB	2_TotalNbOfLinesinDB
X_17571858_SNP	FBgn0263258	chas	FBgn0263258	0	INTRON	10	11	205	5	X_17571858_SNP	2217	1063836	0.00208	12.31239	4	3R_9661151_SNP	3R_9661151_SNP	FBgn0013998	Nsf2	0	SYNONYMOUS_CODING	87	115	205
3R_17383040_SNP	FBgn0002941	slou	FBgn0002941	136	UPSTREAM	11	13	205	4	3R_17383040_SNP	1944	1116581	0.00174	15.05687	2	2R_11873686_SNP	2R_11873686_SNP	FBgn0265045	Strn-Mlck	0	INTRON	97	127	205
X_17378229_SNP	FBgn0263706	CG43658	FBgn0263706	0	INTRON	15	17	205	5	X_17378229_SNP	3988	1187795	0.00336	14.24653	4	3R_25068857_SNP	3R_25068857_SNP	FBgn0051445	CG31445	0	INTRON	93	114	205
3R_19382984_SNP	FBgn0039089	beat-IV	FBgn0039089	150	UPSTREAM	20	21	205	4	3R_19382984_SNP	4380	1266415	0.00346	20.62755	4	3R_12191943_SNP	3R_12191943_SNP	FBgn0038422	CG14880	0	INTRON	111	141	205
3R_19388102_SNP	FBgn0039089	beat-IV	FBgn0039089	0	INTRON	19	21	205	4	3R_19388102_SNP	7781	1250983	0.00622	19.44127	4	3R_18521462_SNP	3R_18521462_SNP	FBgn0263986	cd	0	START_GAINED	52	65	205
X_15295087_SNP	FBgn0263257	cngl	FBgn0263257	0	INTRON	19	22	205	5	X_15295087_SNP	1740	1252668	0.00139	14.36885	1	2L_5170220_SNP	2L_5170220_SNP	FBgn0261836	Msp-300	0	INTRON	8	10	205
X_19228897_SNP	FBgn0086778	gfA	FBgn0086778	0	INTRON	17	24	205	5	X_19228897_SNP	5568	1222677	0.00455	18.88512	1	2L_9837474_SNP	2L_9837474_SNP	FBgn0032151	nAcRalpha-30D	0	INTRON	13	14	205
3R_19389382_SNP	FBgn0039089	beat-IV	FBgn0039089	0	INTRON	24	27	205	4	3R_19389382_SNP	6224	1290163	0.00482	20.03938	4	3R_18521462_SNP	3R_18521462_SNP	FBgn0263986	cd	0	START_GAINED	52	65	205
3R_19426990_SNP	FBgn0051143	tRNA:CR31143	FBgn0051143	65	DOWNSTREAM	22	27	205	4	3R_19426990_SNP	5465	1274922	0.00429	17.77779	4	3R_25922016_SNP	3R_25922016_SNP	FBgn0015542	sima	0	INTRON	52	67	205
3R_19389250_SNP	FBgn0039089	beat-IV	FBgn0039089	0	INTRON	25	28	205	4	3R_19389250_SNP	8864	1294520	0.00685	21.04311	4	3R_18521462_SNP	3R_18521462_SNP	FBgn0263986	cd	0	START_GAINED	52	65	205
3L_11196878_SNP	FBgn0036147	Plod	FBgn0036147	0	INTRON	23	31	205	3	3L_11196878_SNP	3093	1284087	0.00241	15.74144	4	3R_20709732_SNP	3R_20709732_SNP	FBgn0051121	CG31121	0	SYNONYMOUS_CODING	34	42	205
3L_11196879_SNP	FBgn0036147	Plod	FBgn0036147	0	INTRON	24	32	205	3	3L_11196879_SNP	3664	1288081	0.00284	16.85987	4	3R_20709732_SNP	3R_20709732_SNP	FBgn0051121	CG31121	0	SYNONYMOUS_CODING	34	42	205
3L_18984116_SNP	FBgn0036837	CG18135	FBgn0036837	0	NON_SYNONYMOUS_CODING	26	32	205	3	3L_18984116_SNP	17576	1294195	0.01358	25.26608	4	3R_11769152_SNP	3R_11769152_SNP	FBgn0013334	Sap47	0	INTRON	5	10	205
X_15294998_SNP	FBgn0263257	cngl	FBgn0263257	0	INTRON	32	35	205	5	X_15294998_SNP	14852	1323741	0.01122	25.15378	4	3R_25461475_SNP	3R_25461475_SNP	FBgn0015129	DopR2	0	INTRON	45	53	205
2R_6272023_SNP	FBgn0261698	CG42732	FBgn0261698	0	INTRON	27	36	205	2	2R_6272023_SNP	1402	1308914	0.00107	13.76083	3	3L_8254157_SNP	3L_8254157_SNP	FBgn0263219	Dscam4	0	INTRON	10	12	205
3R_19182085_SNP	FBgn0024509	sec13	FBgn0024509	200	UPSTREAM	30	37	205	4	3R_19182085_SNP	5018	1312551	0.00382	17.39516	5	X_18661264_SNP	X_18661264_SNP	FBgn0030954	CCKLR-17D3	0	INTRON	17	23	205
2R_8954142_SNP	FBgn0033791	Drl-2	FBgn0033791	0	INTRON	32	41	205	2	2R_8954142_SNP	18550	1321387	0.01404	28.57947	2	2R_13969642_SNP	2R_13969642_SNP	FBgn0085415	CG34386	0	INTRON	11	13	205
2R_8954146_SNP	FBgn0033791	Drl-2	FBgn0033791	0	INTRON	33	41	205	2	2R_8954146_SNP	12780	1323309	0.00966	25.11702	3	3L_9770209_SNP	3L_9770209_SNP	FBgn0036043	CG8177	0	INTRON	19	23	205
3R_16838459_SNP	FBgn0013995	Calx	FBgn0013995	0	INTRON	32	43	205	4	3R_16838459_SNP	17289	1323611	0.01306	21.52485	4	3R_14611051_SNP	3R_14611051_SNP	FBgn0038652	CG7720	0	INTRON	11	13	205
3R_16838434_SNP	FBgn0013995	Calx	FBgn0013995	0	INTRON	33	44	205	4	3R_16838434_SNP	16403	1324362	0.01239	21.35161	4	3R_14611051_SNP	3R_14611051_SNP	FBgn0038652	CG7720	0	INTRON	11	13	205
3R_21444118_SNP	FBgn0039348	Npl4	FBgn0039348	0	INTRON	32	45	205	4	3R_21444118_SNP	7060	1327566	0.00532	24.31730	5	X_15101247_SNP	X_15101247_SNP	FBgn0052588	CG32588	578	UPSTREAM	11	13	205
3R_16838601_SNP	FBgn0013995	Calx	FBgn0013995	0	INTRON	35	47	205	4	3R_16838601_SNP	19024	1332881	0.01427	25.99339	4	3R_11025977_SNP	3R_11025977_SNP	FBgn0260659	CG42542	0	INTRON	24	31	205
2L_9327133_SNP	FBgn0032109	CG17005	FBgn0032109	611	UPSTREAM	41	48	205	1	2L_9327133_SNP	5136	1334607	0.00385	18.18300	1	2L_783364_SNP	2L_783364_SNP	FBgn0041250	Gr21a	479	DOWNSTREAM	13	17	205
3L_9949074_SNP	FBgn0085385	CG34356	FBgn0085385	0	INTRON	43	48	205	3	3L_9949074_SNP	5765	1347196	0.00428	22.30924	5	X_14211578_SNP	X_14211578_SNP	FBgn0052598	betaNACtes6	395	UPSTREAM	44	53	205
3R_16838581_SNP	FBgn0013995	Calx	FBgn0013995	0	INTRON	37	49	205	4	3R_16838581_SNP	20946	1336401	0.01567	26.74160	5	X_4568660_SNP	X_4568660_SNP	FBgn0262699	rap	0	INTRON	62	78	205
2R_19564744_SNP	FBgn0034886	Pde8	FBgn0034886	0	INTRON	44	52	205	2	2R_19564744_SNP	22017	1348287	0.01633	36.55530	3	3L_11141389_SNP	3L_11141389_SNP	FBgn0052082	CG32082	0	INTRON	53	64	205
3R_21444100_SNP	FBgn0039348	Npl4	FBgn0039348	0	INTRON	38	53	205	4	3R_21444100_SNP	6981	1344092	0.00519	24.12185	5	X_15101247_SNP	X_15101247_SNP	FBgn0052588	CG32588	578	UPSTREAM	11	13	205
3R_20511318_SNP	FBgn0003429	slo	FBgn0003429	0	INTRON	47	58	205	4	3R_20511318_SNP	14817	1349837	0.01098	29.78375	3	3L_3165209_SNP	3L_3165209_SNP	FBgn0052280	CG32280	0	START_GAINED	21	25	205
2R_8954279_SNP	FBgn0033791	Drl-2	FBgn0033791	0	INTRON	47	59	205	2	2R_8954279_SNP	11323	1345156	0.00842	29.06165	4	3R_10645057_SNP	3R_10645057_SNP	FBgn0264754	btsz	0	INTRON	8	11	205
X_19168464_SNP	FBgn0052537	CG32537	FBgn0052537	0	NON_SYNONYMOUS_CODING	47	60	205	5	X_19168464_SNP	22098	1352471	0.01634	35.14878	3	3L_699691_SNP	3L_699691_SNP	FBgn0035157	CG13894	547	UPSTREAM	86	111	205
3R_15180964_SNP	FBgn0262839	CG43203	FBgn0262839	358	DOWNSTREAM	45	61	205	4	3R_15180964_SNP	4777	1347909	0.00354	16.74788	5	X_7088987_SNP	X_7088987_SNP	FBgn0029939	CG9650	0	INTRON	114	143	205
3R_12596795_SNP	FBgn0020556	bxd	FBgn0020556	0	INTRON	43	63	205	4	3R_12596795_SNP	17098	1346199	0.01270	26.62002	5	X_13079272_SNP	X_13079272_SNP	FBgn0085440	CG34411	0	INTRON	12	15	205
3R_18178677_SNP	FBgn0038946	rdhB	FBgn0038946	0	INTRON	55	64	205	4	3R_18178677_SNP	11770	1353133	0.00870	26.31294	3	3L_1339269_SNP	3L_1339269_SNP	FBgn0010786	l(3)02640	0	UTR_3_PRIME	11	15	205
3L_7172451_SNP	FBgn0265296	Dscam2	FBgn0265296	0	INTRON	51	70	205	3	3L_7172451_SNP	11160	1353760	0.00824	21.97507	2	2R_9099617_SNP	2R_9099617_SNP	FBgn0085264	CG34235	0	NON_SYNONYMOUS_CODING	22	26	205
3R_9825245_SNP	FBgn0264493	rdx	FBgn0264493	0	INTRON	51	71	205	4	3R_9825245_SNP	10293	1354812	0.00760	23.41396	5	X_9084535_SNP	X_9084535_SNP	FBgn0030097	CG12115	0	INTRON	73	91	205
2R_4326894_SNP	FBgn0033292	Cyp4ad1	FBgn0033292	6	DOWNSTREAM	57	72	205	2	2R_4326894_SNP	12327	1357645	0.00908	22.81475	2	2R_12879686_SNP	2R_12879686_SNP	FBgn0004580	Cbp53E	0	INTRON	43	54	205
X_15383928_SNP	FBgn0027287	Gmap	FBgn0027287	0	INTRON	61	76	205	5	X_15383928_SNP	16044	1359688	0.01180	28.69017	2	2R_11005269_SNP	2R_11005269_SNP	FBgn0015371	chn	0	INTRON	15	19	205
3R_21795155_SNP	FBgn0259146	CG42261	FBgn0259146	647	UPSTREAM	64	77	205	4	3R_21795155_SNP	13508	1357488	0.00995	23.19681	5	X_13502809_SNP	X_13502809_SNP	FBgn0030499	CG11178	0	SYNONYMOUS_CODING	11	14	205
2R_19626981_SNP	FBgn0000562	egl	FBgn0000562	0	INTRON	62	79	205	2	2R_19626981_SNP	15515	1359560	0.01141	26.54766	2	2R_19909174_SNP	2R_19909174_SNP	FBgn0034958	CG3907	0	INTRON	56	65	205
3R_21795309_SNP	FBgn0259146	CG42261	FBgn0259146	493	UPSTREAM	69	79	205	4	3R_21795309_SNP	12604	1359998	0.00927	23.18515	2	2R_5630500_SNP	2R_5630500_SNP	FBgn0259678	sqa	0	INTRON	11	13	205
2R_19626997_SNP	FBgn0000562	egl	FBgn0000562	0	INTRON	62	81	205	2	2R_19626997_SNP	14348	1359804	0.01055	26.74031	2	2R_19909174_SNP	2R_19909174_SNP	FBgn0034958	CG3907	0	INTRON	56	65	205
3R_21795290_SNP	FBgn0259146	CG42261	FBgn0259146	512	UPSTREAM	77	89	205	4	3R_21795290_SNP	12034	1360304	0.00885	21.86553	3	3L_19319978_SNP	3L_19319978_SNP	FBgn0003089	pip	0	INTRON	40	50	205
3R_21795383_SNP	FBgn0259146	CG42261	FBgn0259146	419	UPSTREAM	79	94	205	4	3R_21795383_SNP	11246	1356469	0.00829	22.56249	2	2R_13380619_SNP	2R_13380619_SNP	FBgn0050104	NT5E-2	0	UTR_3_PRIME	27	37	205
3R_20666367_SNP	FBgn0053658	CG33658	FBgn0053658	0	NON_SYNONYMOUS_CODING	76	95	205	4	3R_20666367_SNP	13258	1358481	0.00976	23.12185	4	3R_14209921_SNP	3R_14209921_SNP	FBgn0038611	CG14309	0	SYNONYMOUS_CODING	82	102	205
3R_21795302_SNP	FBgn0259146	CG42261	FBgn0259146	500	UPSTREAM	83	95	205	4	3R_21795302_SNP	10827	1359961	0.00796	22.18522	4	3R_5741543_SNP	3R_5741543_SNP	FBgn0263097	Glut4EF	0	INTRON	50	65	205
3R_21795091_SNP	FBgn0259146	CG42261	FBgn0259146	711	UPSTREAM	79	97	205	4	3R_21795091_SNP	13449	1360326	0.00989	30.40488	2	2R_17478765_SNP	2R_17478765_SNP	FBgn0053225	CG33225	0	NON_SYNONYMOUS_CODING	32	39	205
3R_20666410_SNP	FBgn0053658	CG33658	FBgn0053658	0	INTRON	78	98	205	4	3R_20666410_SNP	13866	1358652	0.01021	30.32466	5	X_11556393_SNP	X_11556393_SNP	FBgn0004370	Ptp10D	0	INTRON	22	29	205
3R_21795380_SNP	FBgn0259146	CG42261	FBgn0259146	422	UPSTREAM	83	98	205	4	3R_21795380_SNP	11117	1357036	0.00819	22.42912	1	2L_20397137_SNP	2L_20397137_SNP	FBgn0032857	CG10947	0	INTRON	24	30	205
3R_21795431_SNP	FBgn0259146	CG42261	FBgn0259146	371	UPSTREAM	84	100	205	4	3R_21795431_SNP	13934	1357103	0.01027	25.89833	2	2R_11553050_SNP	2R_11553050_SNP	FBgn0023441	fus	0	INTRON	109	134	205
3L_10124451_SNP	FBgn0040823	dpr6	FBgn0040823	0	INTRON	78	102	205	3	3L_10124451_SNP	14631	1361730	0.01074	31.02295	3	3L_1697340_SNP	3L_1697340_SNP	FBgn0035260	CG7991	0	INTRON	20	27	205
3L_19147534_SNP	FBgn0016797	fz2	FBgn0016797	0	INTRON	79	103	205	3	3L_19147534_SNP	14503	1360204	0.01066	26.06323	2	2R_18719877_SNP	2R_18719877_SNP	FBgn0050265	CG30265	102	UPSTREAM	71	86	205
2R_11976066_SNP	FBgn0034072	Dg	FBgn0034072	0	INTRON	85	109	205	2	2R_11976066_SNP	12026	1362319	0.00883	25.34975	2	2R_3928891_SNP	2R_3928891_SNP	FBgn0025360	Optix	0	SYNONYMOUS_CODING	112	143	205
3R_16112894_SNP	FBgn0262582	cic	FBgn0262582	0	INTRON	86	111	205	4	3R_16112894_SNP	15217	1356956	0.01121	25.39709	5	X_2704955_SNP	X_2704955_SNP	FBgn0028369	kirre	0	INTRON	128	159	205
2L_6331010_SNP	FBgn0021873	Gef26	FBgn0021873	0	INTRON	88	112	205	1	2L_6331010_SNP	22397	1359739	0.01647	28.18998	1	2L_14379409_SNP	2L_14379409_SNP	FBgn0020258	ppk	0	INTRON	24	30	205
X_3143708_SNP	FBgn0000479	dnc	FBgn0000479	0	INTRON	107	136	205	5	X_3143708_SNP	6199	1353169	0.00458	20.22930	4	3R_24921213_SNP	3R_24921213_SNP	FBgn0039633	CG11873	0	INTRON	12	16	205
2R_19197072_SNP	FBgn0034842	Prosbeta5R	FBgn0034842	0	INTRON	107	137	205	2	2R_19197072_SNP	20010	1334423	0.01500	27.03028	4	3R_18235597_SNP	3R_18235597_SNP	FBgn0038961	CG13850	0	SYNONYMOUS_CODING	8	12	205
3R_19428850_SNP	FBgn0039094	CG10184	FBgn0039094	0	INTRON	118	146	205	4	3R_19428850_SNP	3680	1318650	0.00279	18.92918	2	2R_8115960_SNP	2R_8115960_SNP	FBgn0033702	CG8854	0	INTRON	134	170	205
X_20540461_SNP	FBgn0031127	CG1835	FBgn0031127	0	INTRON	140	173	205	5	X_20540461_SNP	3206	1222845	0.00262	16.25725	5	X_15101167_SNP	X_15101167_SNP	FBgn0052588	CG32588	498	UPSTREAM	13	14	205
3L_22284679_SNP	FBgn0027086	Aats-ile	FBgn0027086	0	NON_SYNONYMOUS_CODING	141	175	205	3	3L_22284679_SNP	336	1209452	0.00028	12.87042	5	X_8082775_SNP	X_8082775_SNP	FBgn0261873	sdt	0	INTRON	9	10	205

[truncated: 5 more sheets: FastEpistasis_Cve-HP, FastEpistasis_Cve_SI, FastEpistasis_Cve_AI, FastEpistasis_CVE-FS, FastEpistasis_Cve_ESD]
