# Supplementary material for: Genetic architecture of natural variation of cardiac performance from flies to humans
Source: eLife. 2022 Nov 16;11:e82459. doi: 10.7554/eLife.82459 (PMC9668334; doi:10.7554/eLife.82459)
Supplement: Supplementary file 2. — (a) Enriched annotations within GWA-associated genes traits means. gProfiler_allGWAS: Functional enrichment analysis performed on the 562 genes from FastLMM and FastEpistasis analyses, all traits merged (see Supplementary file 1f), using g:GOSt from G profiler (https://biit.cs.ut.ee/gprofiler/gost). Parameters used were as follows: Background: all annotated genes/selected GO terms size >5 and <500. (b) Enrichment analysis (hypergeometric distribution calculations) for genes identified in a global RNAi screen for heart function (Neely et al., 2010). (c) Principal network component (PNC) formed by genes and gene products from cardiac traits means GWAS (refer to Figure 2B). Details of the 148 genes forming the principal network components of direct genetic and physical interactions among the 562 cardiac performances-associated genes. Gene symbol, FBgn, and cardiac trait(s) for which they have been associated are indicated, together with corresponding Gene Ontology (GO) annotations. Annotations for signaling pathways (in biological processes) are highlighted in yellow, annotations for transcription factors (in molecular function) are highlighted in blue. (d) Details on the interactions depicted in Figure 2B. (e) Statistics of transcription factors (TFs) RNAi cardiac knockdown effects on heart performance traits. TFs were inactivated in the heart by Hand-Gal4 and heart parameters monitored in vivo by tdtk tomato high-speed video recording (see Materials and methods). Graphic representation of the data is displayed in Figure 3C. Wilcoxon-Mann-Whitney rank sum test results for indicated cardiac parameters are shown. [file elife-82459-supp2.xlsx]

## Sheet: Supplementary File 2a 
Functional enrichment analysis performed on the 562 genes from FastLMM and FastEpistasis analyses, all traits merged (Supplementary File 1f), using g:GOSt from G profiler. Parameters used were as follow: Background: all annotated genes / Selected GO terms size >6 and <750.
source	term_name	term_id	adjusted_p_value	negative_log10_of_adjusted_p_value	term_size	query_size	intersection_size	effective_domain_size	intersections
GO:MF	signaling receptor activity	GO:0038023	1.4713770828227025e-9	8.832276012518848	426	468	50	11762	FBGN0040388,FBGN0053531,FBGN0000568,FBGN0004369,FBGN0085387,FBGN0004168,FBGN0261929,FBGN0285896,FBGN0051760,FBGN0034568,FBGN0033159,FBGN0001078,FBGN0264000,FBGN0046113,FBGN0039520,FBGN0034012,FBGN0259683,FBGN0001321,FBGN0000464,FBGN0035331,FBGN0028956,FBGN0028875,FBGN0083963,FBGN0083975,FBGN0038653,FBGN0004839,FBGN0260753,FBGN0003169,FBGN0004244,FBGN0003255,FBGN0038541,FBGN0039747,FBGN0011300,FBG…
GO:MF	molecular transducer activity	GO:0060089	1.4713770828227025e-9	8.832276012518848	426	468	50	11762	FBGN0040388,FBGN0053531,FBGN0000568,FBGN0004369,FBGN0085387,FBGN0004168,FBGN0261929,FBGN0285896,FBGN0051760,FBGN0034568,FBGN0033159,FBGN0001078,FBGN0264000,FBGN0046113,FBGN0039520,FBGN0034012,FBGN0259683,FBGN0001321,FBGN0000464,FBGN0035331,FBGN0028956,FBGN0028875,FBGN0083963,FBGN0083975,FBGN0038653,FBGN0004839,FBGN0260753,FBGN0003169,FBGN0004244,FBGN0003255,FBGN0038541,FBGN0039747,FBGN0011300,FBG…
GO:MF	transmembrane signaling receptor activity	GO:0004888	0.00010584201864922444	3.9753418857531067	360	468	36	11762	FBGN0053531,FBGN0004369,FBGN0004168,FBGN0261929,FBGN0285896,FBGN0051760,FBGN0033159,FBGN0264000,FBGN0046113,FBGN0039520,FBGN0259683,FBGN0001321,FBGN0000464,FBGN0035331,FBGN0028956,FBGN0028875,FBGN0038653,FBGN0004839,FBGN0260753,FBGN0003169,FBGN0004244,FBGN0003255,FBGN0038541,FBGN0039747,FBGN0011300,FBGN0033579,FBGN0265002,FBGN0053696,FBGN0011582,FBGN0003731,FBGN0041248,FBGN0011603,FBGN0010240,FBG…
GO:MF	DNA-binding transcription factor activity	GO:0003700	0.0005559267927728849	3.2549823947273726	572	468	47	11762	FBGN0259176,FBGN0000568,FBGN0003129,FBGN0000097,FBGN0004854,FBGN0036274,FBGN0039355,FBGN0029939,FBGN0262582,FBGN0053196,FBGN0023214,FBGN0039225,FBGN0004652,FBGN0001078,FBGN0034012,FBGN0015396,FBGN0052105,FBGN0011656,FBGN0014343,FBGN0037617,FBGN0085424,FBGN0037618,FBGN0004595,FBGN0020379,FBGN0259162,FBGN0003345,FBGN0085450,FBGN0036411,FBGN0003507,FBGN0262139,FBGN0003944,FBGN0004198,FBGN0020307,FBG…
GO:MF	cell adhesion molecule binding	GO:0050839	0.0026544047885187624	2.5760328478562577	65	468	12	11762	FBGN0051774,FBGN0028369,FBGN0000633,FBGN0033159,FBGN0004839,FBGN0265002,FBGN0000547,FBGN0262869,FBGN0262509,FBGN0041096,FBGN0002306,FBGN0010473
GO:MF	transcription regulator activity	GO:0140110	0.0026845624123655243	2.571126494836945	735	468	54	11762	FBGN0259176,FBGN0039633,FBGN0000568,FBGN0003129,FBGN0000097,FBGN0004854,FBGN0036274,FBGN0039355,FBGN0029939,FBGN0262582,FBGN0053196,FBGN0023214,FBGN0039225,FBGN0004652,FBGN0001078,FBGN0034012,FBGN0015396,FBGN0052105,FBGN0011656,FBGN0014343,FBGN0037617,FBGN0085424,FBGN0037618,FBGN0004595,FBGN0020379,FBGN0259162,FBGN0003345,FBGN0085450,FBGN0036411,FBGN0003507,FBGN0026160,FBGN0262139,FBGN0003944,FBG…
GO:MF	neurotransmitter receptor activity	GO:0030594	0.004306022602992463	2.365923694826248	68	468	12	11762	FBGN0004168,FBGN0261929,FBGN0264000,FBGN0046113,FBGN0259683,FBGN0028875,FBGN0004244,FBGN0011582,FBGN0010240,FBGN0266347,FBGN0032151,FBGN0086778
GO:MF	DNA-binding transcription factor activity, RNA polymerase II-specific	GO:0000981	0.015360277958289354	1.8136009252772263	448	468	36	11762	FBGN0000568,FBGN0003129,FBGN0000097,FBGN0004854,FBGN0036274,FBGN0039355,FBGN0262582,FBGN0023214,FBGN0039225,FBGN0001078,FBGN0034012,FBGN0052105,FBGN0011656,FBGN0014343,FBGN0037617,FBGN0085424,FBGN0037618,FBGN0004595,FBGN0003345,FBGN0085450,FBGN0036411,FBGN0003507,FBGN0262139,FBGN0003944,FBGN0004198,FBGN0039411,FBGN0011276,FBGN0004914,FBGN0264562,FBGN0013469,FBGN0040765,FBGN0052296,FBGN0003118,FBG…
GO:MF	transmitter-gated ion channel activity	GO:0022824	0.01879189944938746	1.7260293200221177	45	468	9	11762	FBGN0264000,FBGN0046113,FBGN0259683,FBGN0028875,FBGN0004244,FBGN0010240,FBGN0266347,FBGN0032151,FBGN0086778
GO:MF	transmitter-gated channel activity	GO:0022835	0.01879189944938746	1.7260293200221177	45	468	9	11762	FBGN0264000,FBGN0046113,FBGN0259683,FBGN0028875,FBGN0004244,FBGN0010240,FBGN0266347,FBGN0032151,FBGN0086778
GO:MF	sequence-specific DNA binding	GO:0043565	0.032348015286604775	1.4901523603281293	650	468	46	11762	FBGN0000568,FBGN0267033,FBGN0003129,FBGN0000097,FBGN0004854,FBGN0036274,FBGN0039355,FBGN0029939,FBGN0262582,FBGN0023214,FBGN0039225,FBGN0001078,FBGN0034012,FBGN0015396,FBGN0052105,FBGN0011656,FBGN0014343,FBGN0037617,FBGN0085424,FBGN0037618,FBGN0004595,FBGN0020379,FBGN0003345,FBGN0085450,FBGN0036411,FBGN0003507,FBGN0262139,FBGN0033528,FBGN0003944,FBGN0085405,FBGN0004198,FBGN0020307,FBGN0039411,FBG…
GO:MF	cation channel activity	GO:0005261	0.03804722700104823	1.419676990457889	182	468	19	11762	FBGN0051477,FBGN0259822,FBGN0259242,FBGN0264000,FBGN0046113,FBGN0285943,FBGN0028875,FBGN0264953,FBGN0261698,FBGN0035934,FBGN0035032,FBGN0036345,FBGN0011589,FBGN0266347,FBGN0032151,FBGN0086778,FBGN0052792,FBGN0003380,FBGN0003386
GO:MF	passive transmembrane transporter activity	GO:0022803	0.044607136531790034	1.3505956545516293	280	468	25	11762	FBGN0085387,FBGN0051477,FBGN0259822,FBGN0259242,FBGN0264000,FBGN0046113,FBGN0259683,FBGN0285943,FBGN0028875,FBGN0264953,FBGN0004244,FBGN0261698,FBGN0035934,FBGN0035032,FBGN0036345,FBGN0011589,FBGN0051225,FBGN0010240,FBGN0266347,FBGN0032151,FBGN0086778,FBGN0052792,FBGN0003380,FBGN0003386,FBGN0016041
GO:MF	channel activity	GO:0015267	0.044607136531790034	1.3505956545516293	280	468	25	11762	FBGN0085387,FBGN0051477,FBGN0259822,FBGN0259242,FBGN0264000,FBGN0046113,FBGN0259683,FBGN0285943,FBGN0028875,FBGN0264953,FBGN0004244,FBGN0261698,FBGN0035934,FBGN0035032,FBGN0036345,FBGN0011589,FBGN0051225,FBGN0010240,FBGN0266347,FBGN0032151,FBGN0086778,FBGN0052792,FBGN0003380,FBGN0003386,FBGN0016041
GO:BP	neuron development	GO:0048666	2.558080507098751e-11	10.59208579166403	640	471	69	11798	FBGN0031414,FBGN0003129,FBGN0040752,FBGN0004369,FBGN0085407,FBGN0004449,FBGN0051721,FBGN0043362,FBGN0285896,FBGN0259822,FBGN0036900,FBGN0261437,FBGN0263930,FBGN0085414,FBGN0033159,FBGN0264006,FBGN0023214,FBGN0000719,FBGN0004652,FBGN0001078,FBGN0004509,FBGN0034012,FBGN0086677,FBGN0000464,FBGN0014343,FBGN0259481,FBGN0259483,FBGN0260660,FBGN0085424,FBGN0004839,FBGN0029903,FBGN0004595,FBGN0003169,FBG…
GO:BP	locomotion	GO:0040011	2.7584585345431183e-11	10.559333540020347	687	471	72	11798	FBGN0259176,FBGN0004369,FBGN0085407,FBGN0004449,FBGN0051721,FBGN0000097,FBGN0285896,FBGN0034745,FBGN0263930,FBGN0033159,FBGN0264006,FBGN0266084,FBGN0000719,FBGN0004652,FBGN0035142,FBGN0034012,FBGN0086677,FBGN0086372,FBGN0000464,FBGN0034540,FBGN0015513,FBGN0014343,FBGN0260660,FBGN0004839,FBGN0260753,FBGN0029903,FBGN0004595,FBGN0003169,FBGN0015286,FBGN0035574,FBGN0003255,FBGN0010415,FBGN0011260,FBG…
GO:BP	cell morphogenesis	GO:0000902	7.825994841517076e-10	9.106460442699255	593	471	63	11798	FBGN0031414,FBGN0029881,FBGN0003129,FBGN0040752,FBGN0004369,FBGN0004449,FBGN0051721,FBGN0285896,FBGN0036900,FBGN0263930,FBGN0033159,FBGN0264006,FBGN0266084,FBGN0000719,FBGN0004652,FBGN0001078,FBGN0034012,FBGN0086677,FBGN0000464,FBGN0015513,FBGN0014343,FBGN0259481,FBGN0259483,FBGN0260660,FBGN0085424,FBGN0004839,FBGN0029903,FBGN0004595,FBGN0003169,FBGN0015286,FBGN0020379,FBGN0035574,FBGN0010415,FBG…
GO:BP	regulation of developmental process	GO:0050793	2.977450304708179e-9	8.526155478399719	722	471	70	11798	FBGN0000114,FBGN0259176,FBGN0051774,FBGN0028369,FBGN0040752,FBGN0051721,FBGN0000097,FBGN0043362,FBGN0285896,FBGN0266756,FBGN0036168,FBGN0263930,FBGN0033159,FBGN0264006,FBGN0000542,FBGN0266084,FBGN0000719,FBGN0001078,FBGN0035142,FBGN0034012,FBGN0000464,FBGN0011656,FBGN0266757,FBGN0259481,FBGN0259483,FBGN0085424,FBGN0003089,FBGN0004595,FBGN0003169,FBGN0015286,FBGN0031816,FBGN0003255,FBGN0003345,FBG…
GO:BP	cellular component morphogenesis	GO:0032989	4.444739497240909e-9	8.352153687613026	601	471	62	11798	FBGN0000114,FBGN0259176,FBGN0003129,FBGN0040752,FBGN0004369,FBGN0004449,FBGN0051721,FBGN0285896,FBGN0015614,FBGN0036900,FBGN0262582,FBGN0263930,FBGN0033159,FBGN0264006,FBGN0000719,FBGN0004652,FBGN0001078,FBGN0034012,FBGN0086677,FBGN0263929,FBGN0000464,FBGN0014343,FBGN0259483,FBGN0260660,FBGN0085424,FBGN0004839,FBGN0029903,FBGN0004595,FBGN0003169,FBGN0020379,FBGN0035574,FBGN0010415,FBGN0011260,FBG…
GO:BP	taxis	GO:0042330	4.706800883771902e-9	8.32727417367305	367	471	46	11798	FBGN0004369,FBGN0004449,FBGN0051721,FBGN0263930,FBGN0033159,FBGN0264006,FBGN0000719,FBGN0004652,FBGN0035142,FBGN0034012,FBGN0086677,FBGN0086372,FBGN0000464,FBGN0034540,FBGN0014343,FBGN0260660,FBGN0004839,FBGN0260753,FBGN0029903,FBGN0004595,FBGN0003169,FBGN0035574,FBGN0010415,FBGN0011260,FBGN0052423,FBGN0035934,FBGN0040068,FBGN0011300,FBGN0028645,FBGN0014135,FBGN0265002,FBGN0005775,FBGN0004198,FBG…
GO:BP	tissue morphogenesis	GO:0048729	5.395010098577783e-9	8.268007738051969	635	471	64	11798	FBGN0051774,FBGN0000097,FBGN0260941,FBGN0004854,FBGN0285896,FBGN0266756,FBGN0262582,FBGN0000352,FBGN0261437,FBGN0263930,FBGN0053196,FBGN0260003,FBGN0000542,FBGN0266084,FBGN0000719,FBGN0004652,FBGN0001078,FBGN0035142,FBGN0034012,FBGN0086677,FBGN0015396,FBGN0001321,FBGN0015513,FBGN0014343,FBGN0036801,FBGN0283508,FBGN0004839,FBGN0003169,FBGN0015286,FBGN0264493,FBGN0031118,FBGN0035574,FBGN0003345,FBG…
GO:BP	morphogenesis of an epithelium	GO:0002009	1.2035366258975578e-8	7.919540688784738	615	471	62	11798	FBGN0051774,FBGN0000097,FBGN0260941,FBGN0004854,FBGN0285896,FBGN0266756,FBGN0262582,FBGN0000352,FBGN0261437,FBGN0263930,FBGN0053196,FBGN0260003,FBGN0000542,FBGN0266084,FBGN0000719,FBGN0004652,FBGN0001078,FBGN0035142,FBGN0034012,FBGN0015396,FBGN0001321,FBGN0015513,FBGN0014343,FBGN0036801,FBGN0283508,FBGN0004839,FBGN0003169,FBGN0015286,FBGN0264493,FBGN0031118,FBGN0035574,FBGN0003345,FBGN0003463,FBG…
GO:BP	cell projection morphogenesis	GO:0048858	1.4473931883255263e-8	7.839413475567639	465	471	52	11798	FBGN0003129,FBGN0040752,FBGN0004369,FBGN0004449,FBGN0051721,FBGN0285896,FBGN0036900,FBGN0263930,FBGN0033159,FBGN0264006,FBGN0000719,FBGN0004652,FBGN0001078,FBGN0034012,FBGN0086677,FBGN0000464,FBGN0014343,FBGN0259483,FBGN0260660,FBGN0085424,FBGN0004839,FBGN0029903,FBGN0004595,FBGN0003169,FBGN0020379,FBGN0035574,FBGN0010415,FBGN0011260,FBGN0036544,FBGN0085450,FBGN0040068,FBGN0011300,FBGN0028645,FBG…
GO:BP	cell part morphogenesis	GO:0032990	2.990203943736682e-8	7.52429919006389	474	471	52	11798	FBGN0003129,FBGN0040752,FBGN0004369,FBGN0004449,FBGN0051721,FBGN0285896,FBGN0036900,FBGN0263930,FBGN0033159,FBGN0264006,FBGN0000719,FBGN0004652,FBGN0001078,FBGN0034012,FBGN0086677,FBGN0000464,FBGN0014343,FBGN0259483,FBGN0260660,FBGN0085424,FBGN0004839,FBGN0029903,FBGN0004595,FBGN0003169,FBGN0020379,FBGN0035574,FBGN0010415,FBGN0011260,FBGN0036544,FBGN0085450,FBGN0040068,FBGN0011300,FBGN0028645,FBG…
GO:BP	post-embryonic development	GO:0009791	3.808428107153838e-8	7.4192542383011535	664	471	64	11798	FBGN0000568,FBGN0028369,FBGN0003129,FBGN0260941,FBGN0004854,FBGN0035871,FBGN0266756,FBGN0262582,FBGN0000352,FBGN0261437,FBGN0263930,FBGN0053196,FBGN0260003,FBGN0266084,FBGN0000719,FBGN0004652,FBGN0001078,FBGN0035142,FBGN0034012,FBGN0038922,FBGN0015396,FBGN0001321,FBGN0015513,FBGN0014343,FBGN0036801,FBGN0037617,FBGN0283508,FBGN0004839,FBGN0037618,FBGN0003169,FBGN0031118,FBGN0035574,FBGN0003345,FBG…
GO:BP	chemotaxis	GO:0006935	3.8699658594595774e-8	7.412292866276623	307	471	40	11798	FBGN0004369,FBGN0004449,FBGN0051721,FBGN0263930,FBGN0033159,FBGN0264006,FBGN0000719,FBGN0004652,FBGN0034012,FBGN0086677,FBGN0000464,FBGN0034540,FBGN0014343,FBGN0260660,FBGN0004839,FBGN0029903,FBGN0004595,FBGN0003169,FBGN0035574,FBGN0010415,FBGN0011260,FBGN0040068,FBGN0011300,FBGN0028645,FBGN0014135,FBGN0265002,FBGN0005775,FBGN0004198,FBGN0031461,FBGN0283521,FBGN0011661,FBGN0041097,FBGN0002306,FBG…
GO:BP	axon development	GO:0061564	4.024102093661984e-8	7.3953310095247975	362	471	44	11798	FBGN0004369,FBGN0004449,FBGN0051721,FBGN0043362,FBGN0285896,FBGN0263930,FBGN0033159,FBGN0264006,FBGN0000719,FBGN0004652,FBGN0034012,FBGN0086677,FBGN0000464,FBGN0014343,FBGN0260660,FBGN0004839,FBGN0029903,FBGN0004595,FBGN0003169,FBGN0035574,FBGN0010415,FBGN0011260,FBGN0036544,FBGN0040068,FBGN0038893,FBGN0011300,FBGN0028645,FBGN0265002,FBGN0005775,FBGN0031461,FBGN0010113,FBGN0283521,FBGN0011661,FBG…
GO:BP	plasma membrane bounded cell projection morphogenesis	GO:0120039	4.0694200835508724e-8	7.390467475899682	463	471	51	11798	FBGN0003129,FBGN0040752,FBGN0004369,FBGN0004449,FBGN0051721,FBGN0285896,FBGN0036900,FBGN0263930,FBGN0033159,FBGN0264006,FBGN0000719,FBGN0004652,FBGN0001078,FBGN0034012,FBGN0086677,FBGN0000464,FBGN0014343,FBGN0259483,FBGN0260660,FBGN0085424,FBGN0004839,FBGN0029903,FBGN0004595,FBGN0003169,FBGN0020379,FBGN0035574,FBGN0010415,FBGN0011260,FBGN0036544,FBGN0085450,FBGN0040068,FBGN0011300,FBGN0028645,FBG…
GO:BP	neuron projection development	GO:0031175	4.42030903257372e-8	7.354547367200704	494	471	53	11798	FBGN0003129,FBGN0040752,FBGN0004369,FBGN0004449,FBGN0051721,FBGN0043362,FBGN0285896,FBGN0036900,FBGN0263930,FBGN0033159,FBGN0264006,FBGN0000719,FBGN0004652,FBGN0001078,FBGN0034012,FBGN0086677,FBGN0000464,FBGN0014343,FBGN0259483,FBGN0260660,FBGN0085424,FBGN0004839,FBGN0029903,FBGN0004595,FBGN0003169,FBGN0020379,FBGN0035574,FBGN0010415,FBGN0011260,FBGN0036544,FBGN0085450,FBGN0040068,FBGN0038893,FBG…
GO:BP	instar larval or pupal development	GO:0002165	5.152239188855689e-8	7.288003983383321	573	471	58	11798	FBGN0000568,FBGN0260941,FBGN0004854,FBGN0035871,FBGN0266756,FBGN0262582,FBGN0000352,FBGN0261437,FBGN0263930,FBGN0053196,FBGN0260003,FBGN0266084,FBGN0000719,FBGN0004652,FBGN0001078,FBGN0035142,FBGN0034012,FBGN0038922,FBGN0015396,FBGN0001321,FBGN0015513,FBGN0014343,FBGN0036801,FBGN0283508,FBGN0004839,FBGN0037618,FBGN0003169,FBGN0031118,FBGN0035574,FBGN0003345,FBGN0003463,FBGN0004924,FBGN0003944,FBG…
GO:BP	regulation of multicellular organismal process	GO:0051239	7.97741094943756e-8	7.09813803506723	611	471	60	11798	FBGN0000114,FBGN0259176,FBGN0040752,FBGN0004168,FBGN0000097,FBGN0043362,FBGN0285896,FBGN0266756,FBGN0263930,FBGN0039225,FBGN0035142,FBGN0034012,FBGN0001321,FBGN0015513,FBGN0266757,FBGN0259481,FBGN0259483,FBGN0085424,FBGN0260753,FBGN0003089,FBGN0004595,FBGN0003169,FBGN0031816,FBGN0004244,FBGN0003255,FBGN0003345,FBGN0010415,FBGN0011260,FBGN0003463,FBGN0003507,FBGN0004924,FBGN0033528,FBGN0003944,FBG…
GO:BP	cell morphogenesis involved in differentiation	GO:0000904	8.732690351365948e-8	7.058851939025917	503	471	53	11798	FBGN0029881,FBGN0003129,FBGN0040752,FBGN0004369,FBGN0004449,FBGN0051721,FBGN0285896,FBGN0036900,FBGN0263930,FBGN0033159,FBGN0264006,FBGN0266084,FBGN0000719,FBGN0004652,FBGN0001078,FBGN0034012,FBGN0086677,FBGN0000464,FBGN0014343,FBGN0260660,FBGN0085424,FBGN0004839,FBGN0029903,FBGN0004595,FBGN0003169,FBGN0020379,FBGN0035574,FBGN0010415,FBGN0011260,FBGN0036544,FBGN0085450,FBGN0040068,FBGN0011300,FBG…
GO:BP	neuron projection morphogenesis	GO:0048812	1.2183396560069436e-7	6.914231619613087	462	471	50	11798	FBGN0003129,FBGN0040752,FBGN0004369,FBGN0004449,FBGN0051721,FBGN0285896,FBGN0036900,FBGN0263930,FBGN0033159,FBGN0264006,FBGN0000719,FBGN0004652,FBGN0001078,FBGN0034012,FBGN0086677,FBGN0000464,FBGN0014343,FBGN0259483,FBGN0260660,FBGN0085424,FBGN0004839,FBGN0029903,FBGN0004595,FBGN0003169,FBGN0020379,FBGN0035574,FBGN0010415,FBGN0011260,FBGN0036544,FBGN0085450,FBGN0040068,FBGN0011300,FBGN0028645,FBG…
GO:BP	tube morphogenesis	GO:0035239	1.5241854515222365e-7	6.816962188066772	526	471	54	11798	FBGN0260941,FBGN0004854,FBGN0285896,FBGN0266756,FBGN0262582,FBGN0000352,FBGN0261437,FBGN0263930,FBGN0053196,FBGN0260003,FBGN0266084,FBGN0000719,FBGN0004652,FBGN0001078,FBGN0035142,FBGN0034012,FBGN0015396,FBGN0001321,FBGN0015513,FBGN0014343,FBGN0036801,FBGN0283508,FBGN0004839,FBGN0003169,FBGN0031118,FBGN0035574,FBGN0003345,FBGN0003463,FBGN0003701,FBGN0262139,FBGN0003944,FBGN0011300,FBGN0014135,FBG…
GO:BP	tube development	GO:0035295	1.5512249972992277e-7	6.809325205411014	736	471	67	11798	FBGN0040388,FBGN0260941,FBGN0004854,FBGN0023407,FBGN0285896,FBGN0266756,FBGN0262582,FBGN0000352,FBGN0261437,FBGN0263930,FBGN0053196,FBGN0260003,FBGN0266084,FBGN0000719,FBGN0004652,FBGN0001078,FBGN0035142,FBGN0034012,FBGN0015396,FBGN0001321,FBGN0015513,FBGN0011656,FBGN0014343,FBGN0036801,FBGN0283508,FBGN0004839,FBGN0003169,FBGN0031118,FBGN0035574,FBGN0003345,FBGN0003463,FBGN0036411,FBGN0003507,FBG…
GO:BP	cell morphogenesis involved in neuron differentiation	GO:0048667	2.444995824324167e-7	6.611721878247732	456	471	49	11798	FBGN0003129,FBGN0040752,FBGN0004369,FBGN0004449,FBGN0051721,FBGN0285896,FBGN0036900,FBGN0263930,FBGN0033159,FBGN0264006,FBGN0000719,FBGN0004652,FBGN0001078,FBGN0034012,FBGN0086677,FBGN0000464,FBGN0014343,FBGN0260660,FBGN0085424,FBGN0004839,FBGN0029903,FBGN0004595,FBGN0003169,FBGN0020379,FBGN0035574,FBGN0010415,FBGN0011260,FBGN0036544,FBGN0085450,FBGN0040068,FBGN0011300,FBGN0028645,FBGN0265002,FBG…
GO:BP	appendage development	GO:0048736	2.7264759971425177e-7	6.564398321323736	355	471	42	11798	FBGN0260941,FBGN0262582,FBGN0000352,FBGN0261437,FBGN0263930,FBGN0053196,FBGN0260003,FBGN0266084,FBGN0000719,FBGN0004652,FBGN0001078,FBGN0035142,FBGN0034012,FBGN0015396,FBGN0014343,FBGN0036801,FBGN0085424,FBGN0283508,FBGN0003169,FBGN0031118,FBGN0035574,FBGN0003345,FBGN0003463,FBGN0262139,FBGN0003944,FBGN0011300,FBGN0265598,FBGN0263706,FBGN0004198,FBGN0031461,FBGN0020307,FBGN0039411,FBGN0000547,FBG…
GO:BP	appendage morphogenesis	GO:0035107	4.7085460307046153e-7	6.327113179564485	347	471	41	11798	FBGN0260941,FBGN0262582,FBGN0000352,FBGN0261437,FBGN0263930,FBGN0053196,FBGN0260003,FBGN0266084,FBGN0000719,FBGN0004652,FBGN0001078,FBGN0035142,FBGN0034012,FBGN0015396,FBGN0014343,FBGN0036801,FBGN0085424,FBGN0283508,FBGN0003169,FBGN0031118,FBGN0035574,FBGN0003345,FBGN0003463,FBGN0003944,FBGN0011300,FBGN0265598,FBGN0263706,FBGN0004198,FBGN0031461,FBGN0020307,FBGN0039411,FBGN0000547,FBGN0003731,FBG…
GO:BP	epithelial tube morphogenesis	GO:0060562	4.7301900816200176e-7	6.325121406885866	480	471	50	11798	FBGN0260941,FBGN0004854,FBGN0285896,FBGN0262582,FBGN0000352,FBGN0261437,FBGN0263930,FBGN0053196,FBGN0260003,FBGN0266084,FBGN0000719,FBGN0004652,FBGN0001078,FBGN0035142,FBGN0034012,FBGN0015396,FBGN0001321,FBGN0015513,FBGN0014343,FBGN0036801,FBGN0283508,FBGN0004839,FBGN0003169,FBGN0031118,FBGN0035574,FBGN0003345,FBGN0003463,FBGN0003701,FBGN0262139,FBGN0003944,FBGN0011300,FBGN0014135,FBGN0265598,FBG…
GO:BP	cell junction organization	GO:0034330	4.864200436886919e-7	6.312988537592138	376	471	43	11798	FBGN0031571,FBGN0264606,FBGN0028369,FBGN0040752,FBGN0085387,FBGN0004449,FBGN0043362,FBGN0285896,FBGN0266756,FBGN0259822,FBGN0261802,FBGN0051646,FBGN0085414,FBGN0264006,FBGN0004509,FBGN0086677,FBGN0000464,FBGN0051004,FBGN0259481,FBGN0259483,FBGN0083963,FBGN0083975,FBGN0029903,FBGN0004595,FBGN0003169,FBGN0014009,FBGN0010415,FBGN0036544,FBGN0040068,FBGN0261871,FBGN0053516,FBGN0040823,FBGN0038282,FBG…
GO:BP	axonogenesis	GO:0007409	6.131010267706996e-7	6.212467956551814	350	471	41	11798	FBGN0004369,FBGN0004449,FBGN0051721,FBGN0285896,FBGN0263930,FBGN0033159,FBGN0264006,FBGN0000719,FBGN0004652,FBGN0034012,FBGN0086677,FBGN0000464,FBGN0014343,FBGN0260660,FBGN0004839,FBGN0029903,FBGN0004595,FBGN0003169,FBGN0035574,FBGN0010415,FBGN0011260,FBGN0036544,FBGN0040068,FBGN0011300,FBGN0028645,FBGN0265002,FBGN0031461,FBGN0010113,FBGN0283521,FBGN0011661,FBGN0041097,FBGN0002306,FBGN0003380,FBG…
GO:BP	neuron projection guidance	GO:0097485	6.57870395926365e-7	6.181859656352619	295	471	37	11798	FBGN0004369,FBGN0004449,FBGN0051721,FBGN0263930,FBGN0033159,FBGN0264006,FBGN0000719,FBGN0004652,FBGN0034012,FBGN0086677,FBGN0000464,FBGN0014343,FBGN0260660,FBGN0004839,FBGN0029903,FBGN0004595,FBGN0003169,FBGN0035574,FBGN0010415,FBGN0011260,FBGN0040068,FBGN0011300,FBGN0028645,FBGN0265002,FBGN0004198,FBGN0031461,FBGN0283521,FBGN0011661,FBGN0041097,FBGN0002306,FBGN0003435,FBGN0267001,FBGN0284408,FBG…
GO:BP	compound eye development	GO:0048749	8.019005475632412e-7	6.095879489973591	382	471	43	11798	FBGN0040388,FBGN0259176,FBGN0031414,FBGN0051774,FBGN0028369,FBGN0004449,FBGN0051721,FBGN0000097,FBGN0004854,FBGN0043362,FBGN0285896,FBGN0261437,FBGN0263930,FBGN0264006,FBGN0000542,FBGN0035142,FBGN0086677,FBGN0015396,FBGN0000464,FBGN0014343,FBGN0259481,FBGN0011666,FBGN0004595,FBGN0003169,FBGN0015286,FBGN0264493,FBGN0003345,FBGN0040068,FBGN0011300,FBGN0014135,FBGN0031461,FBGN0000547,FBGN0003731,FBG…
GO:BP	sensory organ morphogenesis	GO:0090596	8.966681575220459e-7	6.047368252632058	326	471	39	11798	FBGN0040388,FBGN0259176,FBGN0031414,FBGN0051774,FBGN0028369,FBGN0004449,FBGN0000097,FBGN0004854,FBGN0285896,FBGN0262582,FBGN0261437,FBGN0264006,FBGN0000542,FBGN0086677,FBGN0000464,FBGN0014343,FBGN0259481,FBGN0011666,FBGN0004595,FBGN0003169,FBGN0015286,FBGN0264493,FBGN0003345,FBGN0040068,FBGN0011300,FBGN0014135,FBGN0031461,FBGN0000547,FBGN0003731,FBGN0259211,FBGN0001316,FBGN0013469,FBGN0283521,FBG…
GO:BP	eye morphogenesis	GO:0048592	8.966681575220459e-7	6.047368252632058	326	471	39	11798	FBGN0040388,FBGN0259176,FBGN0031414,FBGN0051774,FBGN0028369,FBGN0004449,FBGN0000097,FBGN0004854,FBGN0285896,FBGN0262582,FBGN0261437,FBGN0264006,FBGN0000542,FBGN0086677,FBGN0000464,FBGN0014343,FBGN0259481,FBGN0011666,FBGN0004595,FBGN0003169,FBGN0015286,FBGN0264493,FBGN0003345,FBGN0040068,FBGN0011300,FBGN0014135,FBGN0031461,FBGN0000547,FBGN0003731,FBGN0259211,FBGN0001316,FBGN0013469,FBGN0283521,FBG…
GO:BP	compound eye morphogenesis	GO:0001745	0.000001074752438350932	5.968691560901671	314	471	38	11798	FBGN0040388,FBGN0259176,FBGN0031414,FBGN0051774,FBGN0028369,FBGN0004449,FBGN0000097,FBGN0004854,FBGN0285896,FBGN0261437,FBGN0264006,FBGN0000542,FBGN0086677,FBGN0000464,FBGN0014343,FBGN0259481,FBGN0011666,FBGN0004595,FBGN0003169,FBGN0015286,FBGN0264493,FBGN0003345,FBGN0040068,FBGN0011300,FBGN0014135,FBGN0031461,FBGN0000547,FBGN0003731,FBGN0259211,FBGN0001316,FBGN0013469,FBGN0283521,FBGN0011661,FBG…
GO:BP	axon guidance	GO:0007411	0.0000011340109843855784	5.945382738710361	287	471	36	11798	FBGN0004369,FBGN0004449,FBGN0051721,FBGN0263930,FBGN0033159,FBGN0264006,FBGN0000719,FBGN0004652,FBGN0034012,FBGN0086677,FBGN0000464,FBGN0014343,FBGN0260660,FBGN0004839,FBGN0029903,FBGN0004595,FBGN0003169,FBGN0035574,FBGN0010415,FBGN0011260,FBGN0040068,FBGN0011300,FBGN0028645,FBGN0265002,FBGN0031461,FBGN0283521,FBGN0011661,FBGN0041097,FBGN0002306,FBGN0003435,FBGN0267001,FBGN0284408,FBGN0265974,FBG…
GO:BP	cell projection organization	GO:0030030	0.0000013462161726594788	5.8708851963861814	723	471	64	11798	FBGN0003129,FBGN0040752,FBGN0004369,FBGN0004449,FBGN0051721,FBGN0260941,FBGN0043362,FBGN0285896,FBGN0036900,FBGN0000352,FBGN0263930,FBGN0033159,FBGN0264006,FBGN0000719,FBGN0004652,FBGN0001078,FBGN0034012,FBGN0052082,FBGN0086677,FBGN0000464,FBGN0014343,FBGN0259483,FBGN0260660,FBGN0085424,FBGN0004839,FBGN0029903,FBGN0004595,FBGN0003169,FBGN0020379,FBGN0035574,FBGN0010415,FBGN0011260,FBGN0036544,FBG…
GO:BP	visual system development	GO:0150063	0.000001677575858891843	5.775317832200257	406	471	44	11798	FBGN0040388,FBGN0259176,FBGN0031414,FBGN0051774,FBGN0028369,FBGN0004449,FBGN0051721,FBGN0000097,FBGN0004854,FBGN0043362,FBGN0285896,FBGN0262582,FBGN0261437,FBGN0263930,FBGN0264006,FBGN0000542,FBGN0035142,FBGN0086677,FBGN0015396,FBGN0000464,FBGN0014343,FBGN0259481,FBGN0011666,FBGN0004595,FBGN0003169,FBGN0015286,FBGN0264493,FBGN0003345,FBGN0040068,FBGN0011300,FBGN0014135,FBGN0031461,FBGN0000547,FBG…
GO:BP	eye development	GO:0001654	0.000001677575858891843	5.775317832200257	406	471	44	11798	FBGN0040388,FBGN0259176,FBGN0031414,FBGN0051774,FBGN0028369,FBGN0004449,FBGN0051721,FBGN0000097,FBGN0004854,FBGN0043362,FBGN0285896,FBGN0262582,FBGN0261437,FBGN0263930,FBGN0264006,FBGN0000542,FBGN0035142,FBGN0086677,FBGN0015396,FBGN0000464,FBGN0014343,FBGN0259481,FBGN0011666,FBGN0004595,FBGN0003169,FBGN0015286,FBGN0264493,FBGN0003345,FBGN0040068,FBGN0011300,FBGN0014135,FBGN0031461,FBGN0000547,FBG…
GO:BP	sensory system development	GO:0048880	0.000001677575858891843	5.775317832200257	406	471	44	11798	FBGN0040388,FBGN0259176,FBGN0031414,FBGN0051774,FBGN0028369,FBGN0004449,FBGN0051721,FBGN0000097,FBGN0004854,FBGN0043362,FBGN0285896,FBGN0262582,FBGN0261437,FBGN0263930,FBGN0264006,FBGN0000542,FBGN0035142,FBGN0086677,FBGN0015396,FBGN0000464,FBGN0014343,FBGN0259481,FBGN0011666,FBGN0004595,FBGN0003169,FBGN0015286,FBGN0264493,FBGN0003345,FBGN0040068,FBGN0011300,FBGN0014135,FBGN0031461,FBGN0000547,FBG…
GO:BP	metamorphosis	GO:0007552	0.0000017705438040532018	5.751893324131366	483	471	49	11798	FBGN0260941,FBGN0004854,FBGN0035871,FBGN0262582,FBGN0000352,FBGN0261437,FBGN0263930,FBGN0053196,FBGN0260003,FBGN0266084,FBGN0000719,FBGN0004652,FBGN0001078,FBGN0035142,FBGN0034012,FBGN0038922,FBGN0015396,FBGN0015513,FBGN0014343,FBGN0036801,FBGN0283508,FBGN0004839,FBGN0003169,FBGN0031118,FBGN0035574,FBGN0003345,FBGN0052423,FBGN0003463,FBGN0003944,FBGN0034366,FBGN0011300,FBGN0265598,FBGN0263706,FBG…
GO:BP	post-embryonic appendage morphogenesis	GO:0035120	0.000001985716158320247	5.702082830203732	335	471	39	11798	FBGN0260941,FBGN0262582,FBGN0000352,FBGN0261437,FBGN0263930,FBGN0053196,FBGN0260003,FBGN0266084,FBGN0000719,FBGN0004652,FBGN0001078,FBGN0035142,FBGN0034012,FBGN0015396,FBGN0014343,FBGN0036801,FBGN0283508,FBGN0003169,FBGN0031118,FBGN0035574,FBGN0003345,FBGN0003463,FBGN0003944,FBGN0011300,FBGN0265598,FBGN0263706,FBGN0004198,FBGN0031461,FBGN0020307,FBGN0039411,FBGN0000547,FBGN0003731,FBGN0011224,FBG…
GO:BP	instar larval or pupal morphogenesis	GO:0048707	0.0000023447801019175634	5.629897880028539	456	471	47	11798	FBGN0260941,FBGN0004854,FBGN0035871,FBGN0262582,FBGN0000352,FBGN0261437,FBGN0263930,FBGN0053196,FBGN0260003,FBGN0266084,FBGN0000719,FBGN0004652,FBGN0001078,FBGN0035142,FBGN0034012,FBGN0038922,FBGN0015396,FBGN0015513,FBGN0014343,FBGN0036801,FBGN0283508,FBGN0004839,FBGN0003169,FBGN0031118,FBGN0035574,FBGN0003345,FBGN0003463,FBGN0003944,FBGN0034366,FBGN0011300,FBGN0265598,FBGN0263706,FBGN0004198,FBG…
GO:BP	post-embryonic animal morphogenesis	GO:0009886	0.000002435366501091924	5.6134356720573795	472	471	48	11798	FBGN0260941,FBGN0004854,FBGN0035871,FBGN0266756,FBGN0262582,FBGN0000352,FBGN0261437,FBGN0263930,FBGN0053196,FBGN0260003,FBGN0266084,FBGN0000719,FBGN0004652,FBGN0001078,FBGN0035142,FBGN0034012,FBGN0038922,FBGN0015396,FBGN0015513,FBGN0014343,FBGN0036801,FBGN0283508,FBGN0004839,FBGN0003169,FBGN0031118,FBGN0035574,FBGN0003345,FBGN0003463,FBGN0003944,FBGN0034366,FBGN0011300,FBGN0265598,FBGN0263706,FBG…
GO:BP	sensory organ development	GO:0007423	0.0000032939268014225323	5.48228605607443	492	471	49	11798	FBGN0040388,FBGN0259176,FBGN0031414,FBGN0051774,FBGN0028369,FBGN0004449,FBGN0051721,FBGN0000097,FBGN0004854,FBGN0043362,FBGN0285896,FBGN0262582,FBGN0261437,FBGN0263930,FBGN0264006,FBGN0000542,FBGN0023214,FBGN0035142,FBGN0086677,FBGN0015396,FBGN0000464,FBGN0014343,FBGN0259481,FBGN0011666,FBGN0004595,FBGN0003169,FBGN0015286,FBGN0264493,FBGN0003345,FBGN0040068,FBGN0011300,FBGN0014135,FBGN0265598,FBG…
GO:BP	post-embryonic animal organ development	GO:0048569	0.0000040345853043429276	5.394201097693095	495	471	49	11798	FBGN0028369,FBGN0003129,FBGN0260941,FBGN0004854,FBGN0262582,FBGN0000352,FBGN0261437,FBGN0263930,FBGN0053196,FBGN0260003,FBGN0266084,FBGN0000719,FBGN0004652,FBGN0001078,FBGN0035142,FBGN0034012,FBGN0015396,FBGN0015513,FBGN0014343,FBGN0036801,FBGN0037617,FBGN0283508,FBGN0004839,FBGN0003169,FBGN0031118,FBGN0035574,FBGN0003345,FBGN0003463,FBGN0003507,FBGN0003944,FBGN0011300,FBGN0265598,FBGN0263706,FBG…
GO:BP	imaginal disc-derived appendage morphogenesis	GO:0035114	0.000004259450936900243	5.370646379874456	344	471	39	11798	FBGN0260941,FBGN0262582,FBGN0000352,FBGN0261437,FBGN0263930,FBGN0053196,FBGN0260003,FBGN0266084,FBGN0000719,FBGN0004652,FBGN0001078,FBGN0035142,FBGN0034012,FBGN0015396,FBGN0014343,FBGN0036801,FBGN0283508,FBGN0003169,FBGN0031118,FBGN0035574,FBGN0003345,FBGN0003463,FBGN0003944,FBGN0011300,FBGN0265598,FBGN0263706,FBGN0004198,FBGN0031461,FBGN0020307,FBGN0039411,FBGN0000547,FBGN0003731,FBGN0011224,FBG…
GO:BP	synapse organization	GO:0050808	0.000005010003362368228	5.300161982664196	303	471	36	11798	FBGN0264606,FBGN0040752,FBGN0004449,FBGN0043362,FBGN0285896,FBGN0259822,FBGN0051646,FBGN0085414,FBGN0264006,FBGN0004509,FBGN0086677,FBGN0000464,FBGN0259481,FBGN0259483,FBGN0083963,FBGN0083975,FBGN0029903,FBGN0004595,FBGN0003169,FBGN0014009,FBGN0010415,FBGN0036544,FBGN0261871,FBGN0053516,FBGN0040823,FBGN0038282,FBGN0004516,FBGN0029830,FBGN0261617,FBGN0265416,FBGN0266464,FBGN0036257,FBGN0034135,FBG…
GO:BP	photoreceptor cell differentiation	GO:0046530	0.000005169037672070783	5.2865903026721535	222	471	30	11798	FBGN0040388,FBGN0259176,FBGN0031414,FBGN0004449,FBGN0000097,FBGN0004854,FBGN0261437,FBGN0264006,FBGN0023214,FBGN0086677,FBGN0000464,FBGN0259481,FBGN0011666,FBGN0004595,FBGN0003169,FBGN0015286,FBGN0011300,FBGN0031461,FBGN0000547,FBGN0003731,FBGN0259211,FBGN0001316,FBGN0013469,FBGN0283521,FBGN0011661,FBGN0261617,FBGN0003118,FBGN0021764,FBGN0034135,FBGN0010473
GO:BP	cell-cell signaling	GO:0007267	0.000006015599426684691	5.220721090729654	533	471	51	11798	FBGN0264606,FBGN0040752,FBGN0004449,FBGN0004168,FBGN0261929,FBGN0000097,FBGN0004854,FBGN0259822,FBGN0010014,FBGN0015614,FBGN0031065,FBGN0029939,FBGN0015926,FBGN0263930,FBGN0016930,FBGN0260003,FBGN0264006,FBGN0266721,FBGN0046113,FBGN0264574,FBGN0035142,FBGN0086677,FBGN0086372,FBGN0266757,FBGN0028875,FBGN0083963,FBGN0083975,FBGN0004839,FBGN0004244,FBGN0261090,FBGN0039747,FBGN0011582,FBGN0264078,FBG…
GO:BP	synaptic signaling	GO:0099536	0.0000061883322156261684	5.208426379597683	334	471	38	11798	FBGN0264606,FBGN0040752,FBGN0004449,FBGN0004168,FBGN0261929,FBGN0259822,FBGN0010014,FBGN0015614,FBGN0015926,FBGN0260003,FBGN0264006,FBGN0266721,FBGN0046113,FBGN0086677,FBGN0086372,FBGN0266757,FBGN0028875,FBGN0083963,FBGN0083975,FBGN0004244,FBGN0261090,FBGN0039747,FBGN0011582,FBGN0029830,FBGN0039862,FBGN0010240,FBGN0028582,FBGN0266347,FBGN0032151,FBGN0086778,FBGN0261617,FBGN0261673,FBGN0265416,FBG…
GO:BP	imaginal disc morphogenesis	GO:0007560	0.000006592755635225744	5.180933021365326	409	471	43	11798	FBGN0260941,FBGN0004854,FBGN0262582,FBGN0000352,FBGN0261437,FBGN0263930,FBGN0053196,FBGN0260003,FBGN0266084,FBGN0000719,FBGN0004652,FBGN0001078,FBGN0035142,FBGN0034012,FBGN0015396,FBGN0015513,FBGN0014343,FBGN0036801,FBGN0283508,FBGN0004839,FBGN0003169,FBGN0031118,FBGN0035574,FBGN0003345,FBGN0003463,FBGN0003944,FBGN0011300,FBGN0265598,FBGN0263706,FBGN0004198,FBGN0031461,FBGN0020307,FBGN0039411,FBG…
GO:BP	post-embryonic animal organ morphogenesis	GO:0048563	0.000006592755635225744	5.180933021365326	409	471	43	11798	FBGN0260941,FBGN0004854,FBGN0262582,FBGN0000352,FBGN0261437,FBGN0263930,FBGN0053196,FBGN0260003,FBGN0266084,FBGN0000719,FBGN0004652,FBGN0001078,FBGN0035142,FBGN0034012,FBGN0015396,FBGN0015513,FBGN0014343,FBGN0036801,FBGN0283508,FBGN0004839,FBGN0003169,FBGN0031118,FBGN0035574,FBGN0003345,FBGN0003463,FBGN0003944,FBGN0011300,FBGN0265598,FBGN0263706,FBGN0004198,FBGN0031461,FBGN0020307,FBGN0039411,FBG…
GO:BP	imaginal disc-derived appendage development	GO:0048737	0.0000075517974249614224	5.121949668392376	351	471	39	11798	FBGN0260941,FBGN0262582,FBGN0000352,FBGN0261437,FBGN0263930,FBGN0053196,FBGN0260003,FBGN0266084,FBGN0000719,FBGN0004652,FBGN0001078,FBGN0035142,FBGN0034012,FBGN0015396,FBGN0014343,FBGN0036801,FBGN0283508,FBGN0003169,FBGN0031118,FBGN0035574,FBGN0003345,FBGN0003463,FBGN0003944,FBGN0011300,FBGN0265598,FBGN0263706,FBGN0004198,FBGN0031461,FBGN0020307,FBGN0039411,FBGN0000547,FBGN0003731,FBGN0011224,FBG…
GO:BP	chemical synaptic transmission	GO:0007268	0.0000075853535523204464	5.120024171997435	322	471	37	11798	FBGN0264606,FBGN0040752,FBGN0004449,FBGN0004168,FBGN0261929,FBGN0259822,FBGN0010014,FBGN0015614,FBGN0260003,FBGN0264006,FBGN0266721,FBGN0046113,FBGN0086677,FBGN0086372,FBGN0266757,FBGN0028875,FBGN0083963,FBGN0083975,FBGN0004244,FBGN0261090,FBGN0039747,FBGN0011582,FBGN0029830,FBGN0039862,FBGN0010240,FBGN0028582,FBGN0266347,FBGN0032151,FBGN0086778,FBGN0261617,FBGN0261673,FBGN0265416,FBGN0266464,FBG…
GO:BP	anterograde trans-synaptic signaling	GO:0098916	0.0000075853535523204464	5.120024171997435	322	471	37	11798	FBGN0264606,FBGN0040752,FBGN0004449,FBGN0004168,FBGN0261929,FBGN0259822,FBGN0010014,FBGN0015614,FBGN0260003,FBGN0264006,FBGN0266721,FBGN0046113,FBGN0086677,FBGN0086372,FBGN0266757,FBGN0028875,FBGN0083963,FBGN0083975,FBGN0004244,FBGN0261090,FBGN0039747,FBGN0011582,FBGN0029830,FBGN0039862,FBGN0010240,FBGN0028582,FBGN0266347,FBGN0032151,FBGN0086778,FBGN0261617,FBGN0261673,FBGN0265416,FBGN0266464,FBG…
GO:BP	plasma membrane bounded cell projection organization	GO:0120036	0.000008784877643686601	5.056264283006682	706	471	61	11798	FBGN0003129,FBGN0040752,FBGN0004369,FBGN0004449,FBGN0051721,FBGN0260941,FBGN0043362,FBGN0285896,FBGN0036900,FBGN0000352,FBGN0263930,FBGN0033159,FBGN0264006,FBGN0000719,FBGN0004652,FBGN0001078,FBGN0034012,FBGN0052082,FBGN0086677,FBGN0000464,FBGN0014343,FBGN0259483,FBGN0260660,FBGN0085424,FBGN0004839,FBGN0029903,FBGN0004595,FBGN0003169,FBGN0020379,FBGN0035574,FBGN0010415,FBGN0011260,FBGN0036544,FBG…
GO:BP	trans-synaptic signaling	GO:0099537	0.00000897953949091598	5.046745935234957	324	471	37	11798	FBGN0264606,FBGN0040752,FBGN0004449,FBGN0004168,FBGN0261929,FBGN0259822,FBGN0010014,FBGN0015614,FBGN0260003,FBGN0264006,FBGN0266721,FBGN0046113,FBGN0086677,FBGN0086372,FBGN0266757,FBGN0028875,FBGN0083963,FBGN0083975,FBGN0004244,FBGN0261090,FBGN0039747,FBGN0011582,FBGN0029830,FBGN0039862,FBGN0010240,FBGN0028582,FBGN0266347,FBGN0032151,FBGN0086778,FBGN0261617,FBGN0261673,FBGN0265416,FBGN0266464,FBG…
GO:BP	compound eye photoreceptor cell differentiation	GO:0001751	0.000013189656069551334	4.879766528869361	192	471	27	11798	FBGN0040388,FBGN0259176,FBGN0031414,FBGN0004449,FBGN0000097,FBGN0004854,FBGN0264006,FBGN0086677,FBGN0000464,FBGN0259481,FBGN0011666,FBGN0004595,FBGN0003169,FBGN0015286,FBGN0011300,FBGN0031461,FBGN0000547,FBGN0003731,FBGN0259211,FBGN0001316,FBGN0013469,FBGN0283521,FBGN0011661,FBGN0261617,FBGN0003118,FBGN0034135,FBGN0010473
GO:BP	respiratory system development	GO:0060541	0.000013243267105451955	4.8780048615099085	258	471	32	11798	FBGN0031571,FBGN0000097,FBGN0285896,FBGN0266756,FBGN0263930,FBGN0053196,FBGN0266084,FBGN0001321,FBGN0003169,FBGN0035574,FBGN0010415,FBGN0003701,FBGN0262139,FBGN0003944,FBGN0040068,FBGN0014135,FBGN0004198,FBGN0039411,FBGN0000547,FBGN0003731,FBGN0259211,FBGN0010113,FBGN0038755,FBGN0031728,FBGN0001316,FBGN0264695,FBGN0011661,FBGN0052296,FBGN0266464,FBGN0003118,FBGN0003499,FBGN0039620
GO:BP	cell recognition	GO:0008037	0.000016053253046433962	4.794436948495095	122	471	21	11798	FBGN0004369,FBGN0085407,FBGN0004449,FBGN0051721,FBGN0043362,FBGN0085414,FBGN0033159,FBGN0004652,FBGN0285958,FBGN0004509,FBGN0011260,FBGN0052373,FBGN0265002,FBGN0005775,FBGN0010114,FBGN0283521,FBGN0262509,FBGN0041097,FBGN0267001,FBGN0284408,FBGN0010473
GO:BP	imaginal disc development	GO:0007444	0.000019385546959755162	4.7125219409424375	585	471	53	11798	FBGN0040388,FBGN0260941,FBGN0004854,FBGN0023407,FBGN0285896,FBGN0262582,FBGN0000352,FBGN0261437,FBGN0263930,FBGN0053196,FBGN0260003,FBGN0266084,FBGN0000719,FBGN0004652,FBGN0001078,FBGN0035142,FBGN0034012,FBGN0015396,FBGN0015513,FBGN0014343,FBGN0036801,FBGN0283508,FBGN0004839,FBGN0003169,FBGN0031118,FBGN0035574,FBGN0003345,FBGN0003463,FBGN0003944,FBGN0011300,FBGN0014135,FBGN0265598,FBGN0263706,FBG…
GO:BP	open tracheal system development	GO:0007424	0.00002067544268438128	4.684545182944664	249	471	31	11798	FBGN0031571,FBGN0000097,FBGN0285896,FBGN0266756,FBGN0263930,FBGN0053196,FBGN0001321,FBGN0003169,FBGN0035574,FBGN0010415,FBGN0003701,FBGN0262139,FBGN0003944,FBGN0040068,FBGN0014135,FBGN0004198,FBGN0039411,FBGN0000547,FBGN0003731,FBGN0259211,FBGN0010113,FBGN0038755,FBGN0031728,FBGN0001316,FBGN0264695,FBGN0011661,FBGN0052296,FBGN0266464,FBGN0003118,FBGN0003499,FBGN0039620
GO:BP	eye photoreceptor cell differentiation	GO:0001754	0.000028697699189218272	4.542152921017975	199	471	27	11798	FBGN0040388,FBGN0259176,FBGN0031414,FBGN0004449,FBGN0000097,FBGN0004854,FBGN0264006,FBGN0086677,FBGN0000464,FBGN0259481,FBGN0011666,FBGN0004595,FBGN0003169,FBGN0015286,FBGN0011300,FBGN0031461,FBGN0000547,FBGN0003731,FBGN0259211,FBGN0001316,FBGN0013469,FBGN0283521,FBGN0011661,FBGN0261617,FBGN0003118,FBGN0034135,FBGN0010473
GO:BP	neuron recognition	GO:0008038	0.00004031706210093745	4.394511122391846	117	471	20	11798	FBGN0004369,FBGN0085407,FBGN0004449,FBGN0051721,FBGN0043362,FBGN0085414,FBGN0033159,FBGN0004652,FBGN0004509,FBGN0011260,FBGN0052373,FBGN0265002,FBGN0005775,FBGN0010114,FBGN0283521,FBGN0262509,FBGN0041097,FBGN0267001,FBGN0284408,FBGN0010473
GO:BP	imaginal disc-derived wing morphogenesis	GO:0007476	0.00019750543432871408	3.7044209503337022	289	471	32	11798	FBGN0260941,FBGN0262582,FBGN0000352,FBGN0261437,FBGN0263930,FBGN0053196,FBGN0260003,FBGN0266084,FBGN0000719,FBGN0004652,FBGN0035142,FBGN0034012,FBGN0015396,FBGN0014343,FBGN0036801,FBGN0283508,FBGN0003169,FBGN0003345,FBGN0003463,FBGN0011300,FBGN0265598,FBGN0004198,FBGN0031461,FBGN0020307,FBGN0000547,FBGN0003731,FBGN0011224,FBGN0038755,FBGN0283521,FBGN0052296,FBGN0003118,FBGN0039257
GO:BP	cellular response to endogenous stimulus	GO:0071495	0.0002643629064277324	3.5777994821057852	278	471	31	11798	FBGN0000568,FBGN0004168,FBGN0261929,FBGN0000097,FBGN0285896,FBGN0052638,FBGN0263930,FBGN0039225,FBGN0001078,FBGN0000464,FBGN0259483,FBGN0003169,FBGN0003255,FBGN0085450,FBGN0003463,FBGN0038541,FBGN0011300,FBGN0014135,FBGN0031461,FBGN0011582,FBGN0259211,FBGN0004914,FBGN0264562,FBGN0031016,FBGN0028582,FBGN0003118,FBGN0003380,FBGN0262103,FBGN0033652,FBGN0284408,FBGN0265974
GO:BP	postsynapse organization	GO:0099173	0.00033601554514762095	3.473640630301631	25	471	9	11798	FBGN0040752,FBGN0004449,FBGN0004509,FBGN0083963,FBGN0083975,FBGN0029903,FBGN0014009,FBGN0265416,FBGN0267001
GO:BP	cellular response to organic substance	GO:0071310	0.00036563682032819927	3.436950076449759	405	471	39	11798	FBGN0000568,FBGN0004168,FBGN0261929,FBGN0000097,FBGN0035871,FBGN0285896,FBGN0050156,FBGN0052638,FBGN0263930,FBGN0039225,FBGN0001078,FBGN0000464,FBGN0259483,FBGN0003169,FBGN0264493,FBGN0003255,FBGN0085450,FBGN0003463,FBGN0038541,FBGN0011300,FBGN0014135,FBGN0015622,FBGN0032210,FBGN0031461,FBGN0011582,FBGN0259211,FBGN0004914,FBGN0264562,FBGN0031728,FBGN0031016,FBGN0039862,FBGN0028582,FBGN0003118,FBG…
GO:BP	synaptic target recognition	GO:0008039	0.0004170956366895696	3.3797643533609643	49	471	12	11798	FBGN0085407,FBGN0004449,FBGN0085414,FBGN0004509,FBGN0011260,FBGN0052373,FBGN0005775,FBGN0010114,FBGN0262509,FBGN0041097,FBGN0267001,FBGN0010473
GO:BP	wing disc morphogenesis	GO:0007472	0.0004302362583108728	3.3662929920871343	299	471	32	11798	FBGN0260941,FBGN0262582,FBGN0000352,FBGN0261437,FBGN0263930,FBGN0053196,FBGN0260003,FBGN0266084,FBGN0000719,FBGN0004652,FBGN0035142,FBGN0034012,FBGN0015396,FBGN0014343,FBGN0036801,FBGN0283508,FBGN0003169,FBGN0003345,FBGN0003463,FBGN0011300,FBGN0265598,FBGN0004198,FBGN0031461,FBGN0020307,FBGN0000547,FBGN0003731,FBGN0011224,FBGN0038755,FBGN0283521,FBGN0052296,FBGN0003118,FBGN0039257
GO:BP	growth	GO:0040007	0.0004793927495977601	3.319308538582498	458	471	42	11798	FBGN0259176,FBGN0040752,FBGN0004449,FBGN0043362,FBGN0285896,FBGN0266756,FBGN0262582,FBGN0263930,FBGN0033159,FBGN0264006,FBGN0035142,FBGN0034012,FBGN0086677,FBGN0000464,FBGN0015513,FBGN0014343,FBGN0259481,FBGN0259483,FBGN0004839,FBGN0003089,FBGN0010415,FBGN0011260,FBGN0003463,FBGN0003944,FBGN0011300,FBGN0003731,FBGN0010113,FBGN0267791,FBGN0264562,FBGN0038755,FBGN0011603,FBGN0266464,FBGN0259697,FBG…
GO:BP	response to endogenous stimulus	GO:0009719	0.0004975907790028639	3.3031276762780077	286	471	31	11798	FBGN0000568,FBGN0004168,FBGN0261929,FBGN0000097,FBGN0285896,FBGN0052638,FBGN0263930,FBGN0039225,FBGN0001078,FBGN0000464,FBGN0259483,FBGN0003169,FBGN0003255,FBGN0085450,FBGN0003463,FBGN0038541,FBGN0011300,FBGN0014135,FBGN0031461,FBGN0011582,FBGN0259211,FBGN0004914,FBGN0264562,FBGN0031016,FBGN0028582,FBGN0003118,FBGN0003380,FBGN0262103,FBGN0033652,FBGN0284408,FBGN0265974
GO:BP	postsynaptic membrane organization	GO:0001941	0.0005072003309885612	3.294820471714536	14	471	7	11798	FBGN0004449,FBGN0004509,FBGN0083963,FBGN0083975,FBGN0029903,FBGN0265416,FBGN0267001
GO:BP	regulation of membrane potential	GO:0042391	0.0006329003513055921	3.1986646632604545	102	471	17	11798	FBGN0264606,FBGN0040752,FBGN0085387,FBGN0259242,FBGN0046113,FBGN0028875,FBGN0264953,FBGN0004244,FBGN0261698,FBGN0011589,FBGN0039647,FBGN0010240,FBGN0011661,FBGN0266347,FBGN0032151,FBGN0086778,FBGN0003380
GO:BP	developmental growth	GO:0048589	0.0006454977622878901	3.190105258940095	382	471	37	11798	FBGN0259176,FBGN0040752,FBGN0004449,FBGN0043362,FBGN0285896,FBGN0266756,FBGN0263930,FBGN0033159,FBGN0264006,FBGN0035142,FBGN0034012,FBGN0086677,FBGN0000464,FBGN0259481,FBGN0259483,FBGN0004839,FBGN0003089,FBGN0010415,FBGN0011260,FBGN0003944,FBGN0011300,FBGN0003731,FBGN0010113,FBGN0267791,FBGN0264562,FBGN0038755,FBGN0011603,FBGN0266464,FBGN0259697,FBGN0261811,FBGN0036257,FBGN0003380,FBGN0034135,FBG…
GO:BP	regulation of localization	GO:0032879	0.0007888074219001962	3.103029011764695	551	471	47	11798	FBGN0264606,FBGN0040752,FBGN0085407,FBGN0000097,FBGN0259822,FBGN0029939,FBGN0259173,FBGN0000352,FBGN0263930,FBGN0033159,FBGN0260003,FBGN0264006,FBGN0266084,FBGN0264574,FBGN0086372,FBGN0034540,FBGN0015513,FBGN0029878,FBGN0004595,FBGN0014009,FBGN0264493,FBGN0011260,FBGN0261090,FBGN0051860,FBGN0039747,FBGN0014135,FBGN0031835,FBGN0027556,FBGN0015622,FBGN0003731,FBGN0011589,FBGN0264078,FBGN0031294,FBG…
GO:BP	cell adhesion	GO:0007155	0.0008269247475002169	3.0825340106801327	234	471	27	11798	FBGN0053531,FBGN0051774,FBGN0028369,FBGN0004449,FBGN0000097,FBGN0000633,FBGN0033159,FBGN0266084,FBGN0000464,FBGN0051004,FBGN0260660,FBGN0083963,FBGN0083975,FBGN0004839,FBGN0003255,FBGN0028645,FBGN0265002,FBGN0005775,FBGN0000547,FBGN0264078,FBGN0029830,FBGN0262509,FBGN0041097,FBGN0002306,FBGN0021764,FBGN0267001,FBGN0010473
GO:BP	cellular response to growth factor stimulus	GO:0071363	0.0012731237305858892	2.895129386684582	107	471	17	11798	FBGN0000097,FBGN0285896,FBGN0263930,FBGN0003169,FBGN0085450,FBGN0003463,FBGN0011300,FBGN0014135,FBGN0031461,FBGN0259211,FBGN0031016,FBGN0039862,FBGN0028582,FBGN0003118,FBGN0033652,FBGN0284408,FBGN0265974
GO:BP	cellular response to chemical stimulus	GO:0070887	0.001316012874529162	2.880739862006545	561	471	47	11798	FBGN0000568,FBGN0011828,FBGN0004168,FBGN0261929,FBGN0000097,FBGN0035871,FBGN0285896,FBGN0050156,FBGN0052638,FBGN0263930,FBGN0039225,FBGN0001078,FBGN0027657,FBGN0000464,FBGN0034540,FBGN0259483,FBGN0011666,FBGN0035461,FBGN0003169,FBGN0264493,FBGN0003255,FBGN0085450,FBGN0003463,FBGN0261090,FBGN0038541,FBGN0011300,FBGN0014135,FBGN0015622,FBGN0032210,FBGN0031461,FBGN0011582,FBGN0259211,FBGN0004914,FBG…
GO:BP	response to growth factor	GO:0070848	0.0014562669834426987	2.8367589967217937	108	471	17	11798	FBGN0000097,FBGN0285896,FBGN0263930,FBGN0003169,FBGN0085450,FBGN0003463,FBGN0011300,FBGN0014135,FBGN0031461,FBGN0259211,FBGN0031016,FBGN0039862,FBGN0028582,FBGN0003118,FBGN0033652,FBGN0284408,FBGN0265974
GO:BP	biological adhesion	GO:0022610	0.0016061092033594533	2.794224929291423	242	471	27	11798	FBGN0053531,FBGN0051774,FBGN0028369,FBGN0004449,FBGN0000097,FBGN0000633,FBGN0033159,FBGN0266084,FBGN0000464,FBGN0051004,FBGN0260660,FBGN0083963,FBGN0083975,FBGN0004839,FBGN0003255,FBGN0028645,FBGN0265002,FBGN0005775,FBGN0000547,FBGN0264078,FBGN0029830,FBGN0262509,FBGN0041097,FBGN0002306,FBGN0021764,FBGN0267001,FBGN0010473
GO:BP	cell junction assembly	GO:0034329	0.002518858362386677	2.598796252574659	233	471	26	11798	FBGN0031571,FBGN0264606,FBGN0028369,FBGN0040752,FBGN0085387,FBGN0004449,FBGN0285896,FBGN0266756,FBGN0264006,FBGN0086677,FBGN0000464,FBGN0051004,FBGN0259481,FBGN0259483,FBGN0083963,FBGN0083975,FBGN0004595,FBGN0010415,FBGN0004516,FBGN0261617,FBGN0266464,FBGN0036257,FBGN0034135,FBGN0267001,FBGN0267002,FBGN0039269
GO:BP	cell-cell adhesion	GO:0098609	0.002809251671398733	2.5514093520751433	138	471	19	11798	FBGN0051774,FBGN0028369,FBGN0004449,FBGN0000097,FBGN0000633,FBGN0033159,FBGN0000464,FBGN0083963,FBGN0083975,FBGN0003255,FBGN0028645,FBGN0265002,FBGN0005775,FBGN0000547,FBGN0029830,FBGN0262509,FBGN0021764,FBGN0267001,FBGN0010473
GO:BP	behavior	GO:0007610	0.003255504792675378	2.487381660958787	615	471	49	11798	FBGN0085387,FBGN0051721,FBGN0004168,FBGN0016930,FBGN0264006,FBGN0000536,FBGN0013953,FBGN0039225,FBGN0004652,FBGN0039520,FBGN0034012,FBGN0259683,FBGN0011656,FBGN0259481,FBGN0035331,FBGN0260753,FBGN0264953,FBGN0004595,FBGN0028572,FBGN0004244,FBGN0011260,FBGN0052423,FBGN0035934,FBGN0033528,FBGN0039747,FBGN0265598,FBGN0028509,FBGN0032048,FBGN0011582,FBGN0038282,FBGN0003731,FBGN0086675,FBGN0004516,FBG…
GO:BP	wing disc development	GO:0035220	0.0038644311878827313	2.412914421575773	395	471	36	11798	FBGN0040388,FBGN0260941,FBGN0262582,FBGN0000352,FBGN0261437,FBGN0263930,FBGN0053196,FBGN0260003,FBGN0266084,FBGN0000719,FBGN0004652,FBGN0035142,FBGN0034012,FBGN0015396,FBGN0014343,FBGN0036801,FBGN0283508,FBGN0003169,FBGN0003345,FBGN0003463,FBGN0011300,FBGN0265598,FBGN0004198,FBGN0031461,FBGN0020307,FBGN0000547,FBGN0003731,FBGN0011224,FBGN0038755,FBGN0283521,FBGN0052296,FBGN0053554,FBGN0003118,FBG…
GO:BP	muscle structure development	GO:0061061	0.004089025612665823	2.3883801691217226	254	471	27	11798	FBGN0000114,FBGN0028369,FBGN0003129,FBGN0000097,FBGN0015614,FBGN0260003,FBGN0004652,FBGN0086677,FBGN0015513,FBGN0011656,FBGN0037617,FBGN0003345,FBGN0010415,FBGN0003944,FBGN0040068,FBGN0000547,FBGN0264078,FBGN0029830,FBGN0001316,FBGN0283521,FBGN0264695,FBGN0003118,FBGN0041096,FBGN0086906,FBGN0003499,FBGN0033652,FBGN0003896
GO:BP	cell migration	GO:0016477	0.004832028383770104	2.3158705232945143	318	471	31	11798	FBGN0259176,FBGN0085407,FBGN0000097,FBGN0285896,FBGN0263930,FBGN0033159,FBGN0266084,FBGN0000719,FBGN0086677,FBGN0000464,FBGN0034540,FBGN0015513,FBGN0015286,FBGN0003255,FBGN0010415,FBGN0011260,FBGN0003507,FBGN0040068,FBGN0014135,FBGN0039411,FBGN0003731,FBGN0264695,FBGN0052296,FBGN0261617,FBGN0003118,FBGN0083940,FBGN0041096,FBGN0003499,FBGN0033652,FBGN0265974,FBGN0039269
GO:BP	ameboidal-type cell migration	GO:0001667	0.005418233256986342	2.266142302359061	199	471	23	11798	FBGN0259176,FBGN0000097,FBGN0285896,FBGN0263930,FBGN0000719,FBGN0086677,FBGN0000464,FBGN0015513,FBGN0015286,FBGN0003255,FBGN0010415,FBGN0011260,FBGN0040068,FBGN0014135,FBGN0039411,FBGN0003731,FBGN0264695,FBGN0052296,FBGN0003118,FBGN0041096,FBGN0003499,FBGN0033652,FBGN0039269
GO:BP	regulation of growth	GO:0040008	0.006666534228014743	2.1760998867477377	323	471	31	11798	FBGN0259176,FBGN0043362,FBGN0285896,FBGN0266756,FBGN0262582,FBGN0263930,FBGN0264006,FBGN0035142,FBGN0034012,FBGN0000464,FBGN0015513,FBGN0014343,FBGN0259481,FBGN0259483,FBGN0003089,FBGN0010415,FBGN0011260,FBGN0003463,FBGN0003944,FBGN0011300,FBGN0003731,FBGN0264562,FBGN0038755,FBGN0266464,FBGN0261811,FBGN0036257,FBGN0037203,FBGN0034135,FBGN0267002,FBGN0039269,FBGN0036318
GO:BP	establishment of ommatidial planar polarity	GO:0042067	0.007253170901287434	2.13947208944689	63	471	12	11798	FBGN0051774,FBGN0000097,FBGN0000542,FBGN0014343,FBGN0015286,FBGN0264493,FBGN0000547,FBGN0003731,FBGN0259211,FBGN0283521,FBGN0261617,FBGN0003118
GO:BP	tube formation	GO:0035148	0.008328603949393545	2.0794277894558926	44	471	10	11798	FBGN0285896,FBGN0266756,FBGN0000719,FBGN0001321,FBGN0262139,FBGN0004198,FBGN0003731,FBGN0001316,FBGN0011661,FBGN0039620
GO:BP	negative regulation of cell communication	GO:0010648	0.008383961446810199	2.0765507274352637	392	471	35	11798	FBGN0000568,FBGN0029881,FBGN0040752,FBGN0000097,FBGN0035871,FBGN0029939,FBGN0000352,FBGN0263930,FBGN0039666,FBGN0264006,FBGN0023214,FBGN0004623,FBGN0035142,FBGN0086677,FBGN0000464,FBGN0259483,FBGN0004839,FBGN0015286,FBGN0004244,FBGN0264493,FBGN0085450,FBGN0003463,FBGN0040068,FBGN0052683,FBGN0032210,FBGN0000547,FBGN0003731,FBGN0264562,FBGN0031016,FBGN0261617,FBGN0003118,FBGN0262103,FBGN0265523,FBG…
GO:BP	negative regulation of signaling	GO:0023057	0.008867531159784448	2.052197276777794	393	471	35	11798	FBGN0000568,FBGN0029881,FBGN0040752,FBGN0000097,FBGN0035871,FBGN0029939,FBGN0000352,FBGN0263930,FBGN0039666,FBGN0264006,FBGN0023214,FBGN0004623,FBGN0035142,FBGN0086677,FBGN0000464,FBGN0259483,FBGN0004839,FBGN0015286,FBGN0004244,FBGN0264493,FBGN0085450,FBGN0003463,FBGN0040068,FBGN0052683,FBGN0032210,FBGN0000547,FBGN0003731,FBGN0264562,FBGN0031016,FBGN0261617,FBGN0003118,FBGN0262103,FBGN0265523,FBG…
GO:BP	synapse assembly	GO:0007416	0.009353677349566814	2.029017614940607	177	471	21	11798	FBGN0264606,FBGN0040752,FBGN0004449,FBGN0285896,FBGN0264006,FBGN0086677,FBGN0000464,FBGN0259481,FBGN0259483,FBGN0083963,FBGN0083975,FBGN0004595,FBGN0010415,FBGN0004516,FBGN0261617,FBGN0266464,FBGN0036257,FBGN0034135,FBGN0267001,FBGN0267002,FBGN0039269
GO:BP	enzyme linked receptor protein signaling pathway	GO:0007167	0.010271670291876051	1.9883589293761725	298	471	29	11798	FBGN0053531,FBGN0085407,FBGN0000097,FBGN0285896,FBGN0034568,FBGN0262582,FBGN0263930,FBGN0023214,FBGN0086677,FBGN0000464,FBGN0015513,FBGN0259483,FBGN0003169,FBGN0085450,FBGN0003463,FBGN0040068,FBGN0011300,FBGN0014135,FBGN0031461,FBGN0000547,FBGN0003731,FBGN0259211,FBGN0031016,FBGN0028582,FBGN0003118,FBGN0262103,FBGN0033652,FBGN0284408,FBGN0265974
GO:BP	positive regulation of developmental process	GO:0051094	0.010807130135482006	1.9662896188864132	237	471	25	11798	FBGN0000114,FBGN0259176,FBGN0040752,FBGN0043362,FBGN0285896,FBGN0266756,FBGN0000542,FBGN0266084,FBGN0035142,FBGN0034012,FBGN0259483,FBGN0004595,FBGN0010415,FBGN0003944,FBGN0038893,FBGN0011300,FBGN0031461,FBGN0003731,FBGN0264562,FBGN0013469,FBGN0261811,FBGN0003118,FBGN0036257,FBGN0284408,FBGN0036318
GO:BP	R3/R4 cell fate commitment	GO:0007464	0.010927032475673056	1.9614977661770416	14	471	6	11798	FBGN0000097,FBGN0015286,FBGN0259211,FBGN0283521,FBGN0261617,FBGN0003118
GO:BP	positive regulation of cell communication	GO:0010647	0.011626012836333141	1.9345692018728722	466	471	39	11798	FBGN0264606,FBGN0040752,FBGN0285896,FBGN0031065,FBGN0035384,FBGN0263930,FBGN0016930,FBGN0023214,FBGN0264574,FBGN0035142,FBGN0086677,FBGN0015513,FBGN0259483,FBGN0260660,FBGN0260753,FBGN0003089,FBGN0003169,FBGN0264493,FBGN0035574,FBGN0085450,FBGN0003463,FBGN0030774,FBGN0035934,FBGN0040068,FBGN0014135,FBGN0085422,FBGN0263706,FBGN0032210,FBGN0031461,FBGN0000547,FBGN0003731,FBGN0264078,FBGN0283521,FBG…
GO:BP	positive regulation of signaling	GO:0023056	0.011626012836333141	1.9345692018728722	466	471	39	11798	FBGN0264606,FBGN0040752,FBGN0285896,FBGN0031065,FBGN0035384,FBGN0263930,FBGN0016930,FBGN0023214,FBGN0264574,FBGN0035142,FBGN0086677,FBGN0015513,FBGN0259483,FBGN0260660,FBGN0260753,FBGN0003089,FBGN0003169,FBGN0264493,FBGN0035574,FBGN0085450,FBGN0003463,FBGN0030774,FBGN0035934,FBGN0040068,FBGN0014135,FBGN0085422,FBGN0263706,FBGN0032210,FBGN0031461,FBGN0000547,FBGN0003731,FBGN0264078,FBGN0283521,FBG…
GO:BP	regulation of developmental growth	GO:0048638	0.012521171239949511	1.902355044986935	239	471	25	11798	FBGN0043362,FBGN0285896,FBGN0266756,FBGN0263930,FBGN0264006,FBGN0035142,FBGN0034012,FBGN0000464,FBGN0259481,FBGN0259483,FBGN0003089,FBGN0010415,FBGN0011260,FBGN0003944,FBGN0011300,FBGN0003731,FBGN0264562,FBGN0038755,FBGN0266464,FBGN0261811,FBGN0036257,FBGN0034135,FBGN0267002,FBGN0039269,FBGN0036318
GO:BP	localization of cell	GO:0051674	0.014367491761381437	1.842619043227681	385	471	34	11798	FBGN0259176,FBGN0085407,FBGN0000097,FBGN0285896,FBGN0034745,FBGN0263930,FBGN0033159,FBGN0266084,FBGN0000719,FBGN0086677,FBGN0263929,FBGN0000464,FBGN0034540,FBGN0015513,FBGN0015286,FBGN0003255,FBGN0010415,FBGN0011260,FBGN0003507,FBGN0040068,FBGN0261683,FBGN0014135,FBGN0039411,FBGN0003731,FBGN0264695,FBGN0052296,FBGN0261617,FBGN0003118,FBGN0083940,FBGN0041096,FBGN0003499,FBGN0033652,FBGN0265974,FBG…
GO:BP	establishment of planar polarity	GO:0001736	0.015396633938865565	1.8125742156286817	115	471	16	11798	FBGN0051774,FBGN0000097,FBGN0260941,FBGN0266756,FBGN0000542,FBGN0035142,FBGN0014343,FBGN0004839,FBGN0015286,FBGN0264493,FBGN0000547,FBGN0003731,FBGN0259211,FBGN0283521,FBGN0261617,FBGN0003118
GO:BP	establishment of tissue polarity	GO:0007164	0.015396633938865565	1.8125742156286817	115	471	16	11798	FBGN0051774,FBGN0000097,FBGN0260941,FBGN0266756,FBGN0000542,FBGN0035142,FBGN0014343,FBGN0004839,FBGN0015286,FBGN0264493,FBGN0000547,FBGN0003731,FBGN0259211,FBGN0283521,FBGN0261617,FBGN0003118
GO:BP	neuromuscular junction development	GO:0007528	0.015735073215143062	1.8031312319780473	183	471	21	11798	FBGN0040752,FBGN0004449,FBGN0285896,FBGN0259822,FBGN0264006,FBGN0086677,FBGN0000464,FBGN0259481,FBGN0259483,FBGN0083963,FBGN0003169,FBGN0010415,FBGN0036544,FBGN0004516,FBGN0265416,FBGN0266464,FBGN0036257,FBGN0034135,FBGN0267001,FBGN0267002,FBGN0039269
GO:BP	system process	GO:0003008	0.016472996781495015	1.783227386423695	708	471	52	11798	FBGN0000114,FBGN0028369,FBGN0040752,FBGN0004168,FBGN0004854,FBGN0034745,FBGN0085414,FBGN0033159,FBGN0016930,FBGN0264006,FBGN0000536,FBGN0039225,FBGN0266084,FBGN0004623,FBGN0039520,FBGN0259683,FBGN0259481,FBGN0260660,FBGN0028875,FBGN0004595,FBGN0004244,FBGN0020379,FBGN0035934,FBGN0039747,FBGN0262870,FBGN0265598,FBGN0013995,FBGN0028509,FBGN0027556,FBGN0066292,FBGN0004198,FBGN0013810,FBGN0011582,FBG…
GO:BP	visceral muscle development	GO:0007522	0.017599474207155543	1.754500306750734	15	471	6	11798	FBGN0028369,FBGN0086677,FBGN0015513,FBGN0001316,FBGN0086906,FBGN0033652
GO:BP	tissue migration	GO:0090130	0.018607418663371837	1.7303138707171732	185	471	21	11798	FBGN0259176,FBGN0000097,FBGN0285896,FBGN0263930,FBGN0000719,FBGN0086677,FBGN0000464,FBGN0015513,FBGN0015286,FBGN0003255,FBGN0010415,FBGN0040068,FBGN0014135,FBGN0039411,FBGN0003731,FBGN0264695,FBGN0052296,FBGN0003118,FBGN0041096,FBGN0003499,FBGN0039269
GO:BP	response to organic substance	GO:0010033	0.019849516821477328	1.7022500604031403	657	471	49	11798	FBGN0000568,FBGN0004168,FBGN0261929,FBGN0000097,FBGN0035871,FBGN0285896,FBGN0050156,FBGN0052638,FBGN0263930,FBGN0033159,FBGN0039225,FBGN0001078,FBGN0039520,FBGN0038922,FBGN0000464,FBGN0259483,FBGN0003169,FBGN0264493,FBGN0003255,FBGN0085450,FBGN0003463,FBGN0038541,FBGN0011300,FBGN0014135,FBGN0265598,FBGN0066292,FBGN0015622,FBGN0032210,FBGN0031461,FBGN0011582,FBGN0038282,FBGN0003731,FBGN0041248,FBG…
GO:BP	cation transport	GO:0006812	0.020714152317307936	1.6837328345813871	443	471	37	11798	FBGN0040752,FBGN0051477,FBGN0259822,FBGN0259242,FBGN0039357,FBGN0031066,FBGN0264000,FBGN0046113,FBGN0285943,FBGN0028875,FBGN0264953,FBGN0028699,FBGN0261698,FBGN0261090,FBGN0035934,FBGN0051860,FBGN0039747,FBGN0035032,FBGN0013995,FBGN0031835,FBGN0036345,FBGN0027556,FBGN0015622,FBGN0053516,FBGN0020307,FBGN0011589,FBGN0011603,FBGN0032151,FBGN0086778,FBGN0052792,FBGN0085426,FBGN0003380,FBGN0003386,FBG…
GO:BP	muscle organ development	GO:0007517	0.02076435666854937	1.6826815198696425	105	471	15	11798	FBGN0028369,FBGN0260003,FBGN0004652,FBGN0086677,FBGN0015513,FBGN0011656,FBGN0010415,FBGN0003944,FBGN0000547,FBGN0029830,FBGN0001316,FBGN0264695,FBGN0086906,FBGN0003499,FBGN0033652
GO:BP	negative regulation of response to stimulus	GO:0048585	0.020943009736388792	1.6789609053707344	426	471	36	11798	FBGN0000568,FBGN0029881,FBGN0040752,FBGN0000097,FBGN0035871,FBGN0000352,FBGN0263930,FBGN0039666,FBGN0023214,FBGN0004623,FBGN0035142,FBGN0001321,FBGN0000464,FBGN0034540,FBGN0259483,FBGN0085424,FBGN0004839,FBGN0015286,FBGN0264493,FBGN0011260,FBGN0085450,FBGN0003463,FBGN0040068,FBGN0052683,FBGN0032210,FBGN0000547,FBGN0003731,FBGN0264562,FBGN0031016,FBGN0261617,FBGN0003118,FBGN0262103,FBGN0037203,FBG…
GO:BP	regulation of neurogenesis	GO:0050767	0.02239003432082577	1.6499452407070876	145	471	18	11798	FBGN0259176,FBGN0000097,FBGN0285896,FBGN0034012,FBGN0259483,FBGN0085424,FBGN0004595,FBGN0031816,FBGN0003345,FBGN0011260,FBGN0011300,FBGN0031461,FBGN0000547,FBGN0259211,FBGN0010113,FBGN0013469,FBGN0003118,FBGN0284408
GO:BP	positive regulation of signal transduction	GO:0009967	0.023180905233694198	1.634869608479328	428	471	36	11798	FBGN0040752,FBGN0285896,FBGN0031065,FBGN0035384,FBGN0263930,FBGN0016930,FBGN0023214,FBGN0035142,FBGN0086677,FBGN0015513,FBGN0259483,FBGN0260660,FBGN0260753,FBGN0003089,FBGN0003169,FBGN0264493,FBGN0035574,FBGN0085450,FBGN0003463,FBGN0030774,FBGN0035934,FBGN0040068,FBGN0014135,FBGN0085422,FBGN0263706,FBGN0032210,FBGN0031461,FBGN0000547,FBGN0003731,FBGN0264078,FBGN0283521,FBGN0028582,FBGN0261617,FBG…
GO:BP	anatomical structure formation involved in morphogenesis	GO:0048646	0.026125732905731145	1.5829315174378216	554	471	43	11798	FBGN0000114,FBGN0259176,FBGN0028369,FBGN0004854,FBGN0285896,FBGN0266756,FBGN0015614,FBGN0000256,FBGN0262582,FBGN0015926,FBGN0263930,FBGN0000719,FBGN0086677,FBGN0263929,FBGN0001321,FBGN0015513,FBGN0011656,FBGN0266757,FBGN0014343,FBGN0035461,FBGN0003169,FBGN0003463,FBGN0038225,FBGN0003507,FBGN0262139,FBGN0003944,FBGN0040068,FBGN0014135,FBGN0004198,FBGN0000547,FBGN0003731,FBGN0011224,FBGN0031728,FBG…
GO:BP	regulation of locomotion	GO:0040012	0.02655704230523834	1.575820294591684	120	471	16	11798	FBGN0085407,FBGN0004449,FBGN0051721,FBGN0000097,FBGN0033159,FBGN0266084,FBGN0034012,FBGN0034540,FBGN0015513,FBGN0011260,FBGN0014135,FBGN0003731,FBGN0283521,FBGN0267001,FBGN0033652,FBGN0267002
GO:BP	R3/R4 cell differentiation	GO:0048056	0.02721315860632194	1.5652210471330217	16	471	6	11798	FBGN0000097,FBGN0015286,FBGN0259211,FBGN0283521,FBGN0261617,FBGN0003118
GO:BP	cell motility	GO:0048870	0.027276825439730094	1.5642061755930106	380	471	33	11798	FBGN0259176,FBGN0085407,FBGN0000097,FBGN0285896,FBGN0034745,FBGN0263930,FBGN0033159,FBGN0266084,FBGN0000719,FBGN0086677,FBGN0000464,FBGN0034540,FBGN0015513,FBGN0015286,FBGN0003255,FBGN0010415,FBGN0011260,FBGN0003507,FBGN0040068,FBGN0261683,FBGN0014135,FBGN0039411,FBGN0003731,FBGN0264695,FBGN0052296,FBGN0261617,FBGN0003118,FBGN0083940,FBGN0041096,FBGN0003499,FBGN0033652,FBGN0265974,FBGN0039269
GO:BP	dendrite morphogenesis	GO:0048813	0.029768691789135344	1.5262402503799262	162	471	19	11798	FBGN0003129,FBGN0040752,FBGN0036900,FBGN0263930,FBGN0033159,FBGN0004652,FBGN0001078,FBGN0085424,FBGN0004595,FBGN0003169,FBGN0020379,FBGN0011260,FBGN0085450,FBGN0011300,FBGN0004198,FBGN0283521,FBGN0003896,FBGN0010473,FBGN0267002
GO:BP	positive regulation of cell population proliferation	GO:0008284	0.031174703116282402	1.5061976737138707	96	471	14	11798	FBGN0259176,FBGN0053531,FBGN0040752,FBGN0285896,FBGN0259483,FBGN0004595,FBGN0011300,FBGN0014135,FBGN0031461,FBGN0003731,FBGN0013469,FBGN0011661,FBGN0003118,FBGN0284408
GO:BP	positive regulation of neuroblast proliferation	GO:0002052	0.03610561623018699	1.4424252383140488	24	471	7	11798	FBGN0259176,FBGN0259483,FBGN0004595,FBGN0011300,FBGN0031461,FBGN0013469,FBGN0284408
GO:BP	photoreceptor cell development	GO:0042461	0.04071639910502099	1.3902306373011954	111	471	15	11798	FBGN0031414,FBGN0004449,FBGN0261437,FBGN0264006,FBGN0023214,FBGN0086677,FBGN0000464,FBGN0259481,FBGN0259211,FBGN0001316,FBGN0283521,FBGN0011661,FBGN0003118,FBGN0034135,FBGN0010473
GO:BP	glutamate receptor clustering	GO:0097688	0.04303887792173319	1.3661390598033751	6	471	4	11798	FBGN0004509,FBGN0029903,FBGN0014009,FBGN0265416
GO:BP	presynaptic membrane organization	GO:0097090	0.04580999881360516	1.3390397194713457	11	471	5	11798	FBGN0004449,FBGN0004509,FBGN0083963,FBGN0083975,FBGN0267001
GO:BP	positive regulation of neural precursor cell proliferation	GO:2000179	0.04843528919359088	1.3148381028682994	25	471	7	11798	FBGN0259176,FBGN0259483,FBGN0004595,FBGN0011300,FBGN0031461,FBGN0013469,FBGN0284408
GO:BP	morphogenesis of a polarized epithelium	GO:0001738	0.04900361036867334	1.3097719219014707	126	471	16	11798	FBGN0051774,FBGN0000097,FBGN0260941,FBGN0266756,FBGN0000542,FBGN0035142,FBGN0014343,FBGN0004839,FBGN0015286,FBGN0264493,FBGN0000547,FBGN0003731,FBGN0259211,FBGN0283521,FBGN0261617,FBGN0003118
GO:CC	intrinsic component of plasma membrane	GO:0031226	9.782873978687539e-11	10.00953354094572	540	478	60	11919	FBGN0263131,FBGN0053531,FBGN0051774,FBGN0028369,FBGN0040752,FBGN0004449,FBGN0004168,FBGN0261929,FBGN0020762,FBGN0285896,FBGN0000633,FBGN0034568,FBGN0259242,FBGN0263930,FBGN0051646,FBGN0033159,FBGN0013953,FBGN0264000,FBGN0046113,FBGN0001321,FBGN0035331,FBGN0028875,FBGN0083963,FBGN0083975,FBGN0038653,FBGN0260753,FBGN0003169,FBGN0004244,FBGN0028699,FBGN0003255,FBGN0038541,FBGN0011300,FBGN0028645,FBG…
GO:CC	integral component of plasma membrane	GO:0005887	3.4615130418600543e-10	9.46073402776851	526	478	58	11919	FBGN0263131,FBGN0053531,FBGN0051774,FBGN0028369,FBGN0040752,FBGN0004449,FBGN0004168,FBGN0261929,FBGN0020762,FBGN0285896,FBGN0000633,FBGN0034568,FBGN0259242,FBGN0051646,FBGN0033159,FBGN0013953,FBGN0264000,FBGN0046113,FBGN0001321,FBGN0035331,FBGN0028875,FBGN0083963,FBGN0083975,FBGN0038653,FBGN0260753,FBGN0003169,FBGN0004244,FBGN0028699,FBGN0003255,FBGN0038541,FBGN0011300,FBGN0028645,FBGN0013995,FBG…
GO:CC	cell junction	GO:0030054	7.01399316144556e-9	8.154034661885925	597	478	60	11919	FBGN0031571,FBGN0264606,FBGN0051774,FBGN0028369,FBGN0040752,FBGN0085387,FBGN0004449,FBGN0004168,FBGN0261929,FBGN0034606,FBGN0043362,FBGN0010014,FBGN0015614,FBGN0000633,FBGN0015926,FBGN0260003,FBGN0264006,FBGN0266721,FBGN0264000,FBGN0046113,FBGN0086677,FBGN0027596,FBGN0086372,FBGN0000464,FBGN0034540,FBGN0051004,FBGN0266757,FBGN0259483,FBGN0028875,FBGN0083963,FBGN0083975,FBGN0004839,FBGN0029903,FBG…
GO:CC	synapse	GO:0045202	0.000001458013547379637	5.836238440678616	440	478	45	11919	FBGN0264606,FBGN0040752,FBGN0004449,FBGN0004168,FBGN0261929,FBGN0043362,FBGN0010014,FBGN0015614,FBGN0015926,FBGN0260003,FBGN0264006,FBGN0266721,FBGN0264000,FBGN0046113,FBGN0086677,FBGN0086372,FBGN0266757,FBGN0259483,FBGN0028875,FBGN0083963,FBGN0083975,FBGN0029903,FBGN0014009,FBGN0004244,FBGN0010415,FBGN0261090,FBGN0039747,FBGN0013995,FBGN0005775,FBGN0011582,FBGN0029830,FBGN0010114,FBGN0031294,FBG…
GO:CC	receptor complex	GO:0043235	0.00000925764881408864	5.0334992980613364	76	478	16	11919	FBGN0053531,FBGN0040752,FBGN0285896,FBGN0264000,FBGN0046113,FBGN0028875,FBGN0003169,FBGN0011300,FBGN0003731,FBGN0262869,FBGN0029830,FBGN0010240,FBGN0266347,FBGN0032151,FBGN0086778,FBGN0265416
GO:CC	plasma membrane region	GO:0098590	0.000034011218675468165	4.468377806334001	377	478	38	11919	FBGN0264606,FBGN0028369,FBGN0040752,FBGN0004449,FBGN0260941,FBGN0266756,FBGN0263930,FBGN0085414,FBGN0264000,FBGN0046113,FBGN0086372,FBGN0000464,FBGN0051004,FBGN0028875,FBGN0015286,FBGN0004244,FBGN0051860,FBGN0261871,FBGN0053516,FBGN0040823,FBGN0038282,FBGN0003731,FBGN0264078,FBGN0029830,FBGN0011603,FBGN0010240,FBGN0028582,FBGN0011661,FBGN0266347,FBGN0032151,FBGN0086778,FBGN0041096,FBGN0002306,FBG…
GO:CC	synaptic membrane	GO:0097060	0.000048191038361997484	4.317033715947653	85	478	16	11919	FBGN0264606,FBGN0040752,FBGN0004449,FBGN0264000,FBGN0046113,FBGN0086372,FBGN0028875,FBGN0004244,FBGN0029830,FBGN0010240,FBGN0028582,FBGN0266347,FBGN0032151,FBGN0086778,FBGN0267001,FBGN0039269
GO:CC	plasma membrane protein complex	GO:0098797	0.00006068176061267318	4.216941827139159	182	478	24	11919	FBGN0040752,FBGN0259822,FBGN0260003,FBGN0004623,FBGN0264000,FBGN0046113,FBGN0028875,FBGN0003169,FBGN0011300,FBGN0031835,FBGN0053970,FBGN0011589,FBGN0264078,FBGN0029830,FBGN0011661,FBGN0266347,FBGN0032151,FBGN0086778,FBGN0265416,FBGN0003380,FBGN0003386,FBGN0034135,FBGN0039269,FBGN0262511
GO:CC	ion channel complex	GO:0034702	0.00006927736276285323	4.159408653313751	98	478	17	11919	FBGN0040752,FBGN0259822,FBGN0264000,FBGN0046113,FBGN0028875,FBGN0004244,FBGN0035934,FBGN0031835,FBGN0011589,FBGN0029830,FBGN0010240,FBGN0266347,FBGN0032151,FBGN0086778,FBGN0265416,FBGN0003380,FBGN0003386
GO:CC	transmembrane transporter complex	GO:1902495	0.000102204231476407	3.990531123097482	112	478	18	11919	FBGN0040752,FBGN0259822,FBGN0264000,FBGN0046113,FBGN0028875,FBGN0004244,FBGN0035934,FBGN0031835,FBGN0053970,FBGN0011589,FBGN0029830,FBGN0010240,FBGN0266347,FBGN0032151,FBGN0086778,FBGN0265416,FBGN0003380,FBGN0003386
GO:CC	postsynaptic membrane	GO:0045211	0.00012270635211748606	3.9111329546473472	60	478	13	11919	FBGN0040752,FBGN0004449,FBGN0264000,FBGN0046113,FBGN0028875,FBGN0004244,FBGN0029830,FBGN0010240,FBGN0028582,FBGN0266347,FBGN0032151,FBGN0086778,FBGN0039269
GO:CC	postsynapse	GO:0098794	0.0001490363343499495	3.826707839748738	92	478	16	11919	FBGN0040752,FBGN0004449,FBGN0264000,FBGN0046113,FBGN0028875,FBGN0014009,FBGN0004244,FBGN0013995,FBGN0029830,FBGN0010240,FBGN0028582,FBGN0266347,FBGN0032151,FBGN0086778,FBGN0265416,FBGN0039269
GO:CC	transporter complex	GO:1990351	0.0004202525895845843	3.376489601769918	123	478	18	11919	FBGN0040752,FBGN0259822,FBGN0264000,FBGN0046113,FBGN0028875,FBGN0004244,FBGN0035934,FBGN0031835,FBGN0053970,FBGN0011589,FBGN0029830,FBGN0010240,FBGN0266347,FBGN0032151,FBGN0086778,FBGN0265416,FBGN0003380,FBGN0003386
GO:CC	plasma membrane signaling receptor complex	GO:0098802	0.0009676081257616634	3.014300493184658	51	478	11	11919	FBGN0040752,FBGN0264000,FBGN0046113,FBGN0028875,FBGN0003169,FBGN0011300,FBGN0029830,FBGN0266347,FBGN0032151,FBGN0086778,FBGN0265416
GO:CC	cell surface	GO:0009986	0.0010844835452337826	2.964777033108878	83	478	14	11919	FBGN0040388,FBGN0031414,FBGN0028369,FBGN0263930,FBGN0086677,FBGN0001321,FBGN0000464,FBGN0083963,FBGN0083975,FBGN0010415,FBGN0005775,FBGN0000547,FBGN0262869,FBGN0041096
GO:CC	neuron projection	GO:0043005	0.0019750570634124304	2.7044203522060637	514	478	42	11919	FBGN0040752,FBGN0004369,FBGN0004449,FBGN0051721,FBGN0004168,FBGN0261929,FBGN0051646,FBGN0085414,FBGN0033159,FBGN0264006,FBGN0039520,FBGN0086677,FBGN0000464,FBGN0259483,FBGN0028875,FBGN0004839,FBGN0260753,FBGN0029903,FBGN0014009,FBGN0004244,FBGN0010415,FBGN0013995,FBGN0265002,FBGN0005775,FBGN0011582,FBGN0261871,FBGN0053516,FBGN0040823,FBGN0038282,FBGN0041248,FBGN0029830,FBGN0010113,FBGN0039862,FBG…
GO:CC	presynapse	GO:0098793	0.017140229529156423	1.7659833666264364	236	478	23	11919	FBGN0264606,FBGN0040752,FBGN0043362,FBGN0010014,FBGN0015614,FBGN0266721,FBGN0086677,FBGN0086372,FBGN0266757,FBGN0259483,FBGN0083963,FBGN0083975,FBGN0014009,FBGN0261090,FBGN0011582,FBGN0029830,FBGN0039862,FBGN0028582,FBGN0261617,FBGN0266464,FBGN0267001,FBGN0035756,FBGN0039269
GO:CC	axon	GO:0030424	0.038896724039020975	1.410086974296069	282	478	25	11919	FBGN0040752,FBGN0004369,FBGN0051721,FBGN0033159,FBGN0039520,FBGN0086677,FBGN0000464,FBGN0259483,FBGN0004839,FBGN0029903,FBGN0014009,FBGN0004244,FBGN0010415,FBGN0013995,FBGN0265002,FBGN0005775,FBGN0041248,FBGN0029830,FBGN0010113,FBGN0039862,FBGN0041097,FBGN0003386,FBGN0267001,FBGN0010473,FBGN0267002
GO:CC	contractile fiber	GO:0043292	0.04709635644864822	1.3270126902268202	76	478	11	11919	FBGN0035384,FBGN0261565,FBGN0265045,FBGN0036454,FBGN0263846,FBGN0027556,FBGN0264695,FBGN0041097,FBGN0041096,FBGN0086906,FBGN0052311
KEGG	Dorso-ventral axis formation	KEGG:04320	0.012141690616760667	1.9157208376091317	28	113	6	3233	FBGN0000114,FBGN0000097,FBGN0000256,FBGN0250816,FBGN0003731,FBGN0003118
TF	Factor: Trl
TF	Factor: GAGA

## Sheet: Supplementary File 2b
Enrichment analysis (hypergeometric distribution calculations) for genes identified in a global RNAi screen for heart function (Neely et al., Cell 2010, PMID:20371351)
	Overlap_with_RNAi hits (Neely et al, 2010)
Lot size	7061	success of lot = 835
sample size	303	successes of sample= 36
		expected overlap= 35,8 (FC= 1)
		p val = 0,55

## Sheet: Supplementary File 2c
Principal Network Component (PNC) formed by genes and gene products from cardiac GWAS (refers to figure 2B)
Details of the 148 genes forming the principal network components of direct genetic and physical interactions among the 562 cardiac performances associated genes. Gene symbol, FBgn and cardiac trait(s) for which it has been associated are indicated, together with corresponding GO annotations. Annotations for signaling pathways (in biological processes) are highlighted in yellow, annotations for t…
shared name	symbol	meanAI	meanDD	meanDImedian	meanFS	meanHPmedian	meanSD	meanSImedian	methode	shared name	symbol		GO_BIOLOGICAL_PROCESS	GO_CELLULAR_COMPONENT	GO_MOLECULAR_FUNCTION
FBgn0003499	sr	0	1	0	0	0	0	0	FastEpistasis	FBgn0003499	sr		muscle organ development ; GO:0007517 | inferred from mutant phenotype <newline> ectoderm development ; GO:0007398 | inferred from mutant phenotype <newline> regulation of transcription by RNA polymerase II ; GO:0006357 | inferred from biological aspect of ancestor with PANTHER:PTN001145452 <newline> protein sumoylation ; GO:0016925 | inferred from sequence or structural similarity with UniProtKB…	nucleus ; GO:0005634 | inferred from biological aspect of ancestor with PANTHER:PTN001145452	nucleic acid binding ; GO:0003676 | inferred from electronic annotation with InterPro:IPR013087 <newline> SUMO ligase activity ; GO:0061665 | inferred from sequence or structural similarity with UniProtKB:P08152 <newline> DNA-binding transcription factor activity, RNA polymerase II-specific ; GO:0000981 | inferred from biological aspect of ancestor with PANTHER:PTN001145452
FBgn0003896	tup	0	0	0	0	0	1	0	FastEpistasis	FBgn0003896	tup		heart development ; GO:0007507 | inferred from mutant phenotype <newline> chaeta morphogenesis ; GO:0008407 | inferred from mutant phenotype <newline> axon guidance ; GO:0007411 | inferred from mutant phenotype <newline> motor neuron axon guidance ; GO:0008045 | inferred from mutant phenotype <newline> negative regulation of DNA-binding transcription factor activity ; GO:0043433 | inferred from d…	nucleus ; GO:0005634 | inferred from direct assay <newline> nucleus ; GO:0005634 | inferred from biological aspect of ancestor with PANTHER:PTN001197649	RNA polymerase II regulatory region sequence-specific DNA binding ; GO:0000977 | inferred from direct assay <newline> DNA-binding transcription factor activity, RNA polymerase II-specific ; GO:0000981 | inferred from direct assay <newline> protein binding ; GO:0005515 | inferred from physical interaction with Chi <newline> RNA polymerase II activating transcription factor binding ; GO:0001102 | i…
FBgn0000547	ed	1	0	0	0	0	0	0	FastEpistasis	FBgn0000547	ed		regulation of cell shape ; GO:0008360 | inferred from mutant phenotype <newline> negative regulation of R8 cell differentiation ; GO:0045680 | inferred from mutant phenotype <newline> regulation of actin cytoskeleton organization by cell-cell adhesion ; GO:0090138 | inferred from mutant phenotype <newline> negative regulation of neurogenesis ; GO:0050768 | inferred from mutant phenotype <newline>…	integral component of plasma membrane ; GO:0005887 | inferred from direct assay <newline> cell surface ; GO:0009986 | inferred from direct assay <newline> adherens junction ; GO:0005912 | inferred from direct assay <newline> cell cortex ; GO:0005938 | inferred from high throughput direct assay <newline> plasma membrane ; GO:0005886 | inferred from high throughput direct assay <newline> early endo…	cell adhesion molecule binding ; GO:0050839 | inferred from physical interaction with Nrg <newline> protein binding ; GO:0005515 | inferred from physical interaction with Grip <newline> epidermal growth factor receptor binding ; GO:0005154 | inferred from physical interaction with Egfr
FBgn0003463	sog	0	0	0	1	0	0	0	FastLMM	FBgn0003463	sog		negative regulation of BMP signaling pathway ; GO:0030514 | inferred from direct assay inferred from genetic interaction with tsg <newline> positive regulation of BMP signaling pathway ; GO:0030513 | inferred from mutant phenotype <newline> negative regulation of BMP signaling pathway ; GO:0030514 | inferred from direct assay inferred from genetic interaction with cv <newline> maternal specificat…	extracellular space ; GO:0005615 | inferred from direct assay	BMP binding ; GO:0036122 | inferred from direct assay <newline> collagen binding ; GO:0005518 | inferred from direct assay <newline> BMP binding ; GO:0036122 | inferred from physical interaction with dpp, gbb
FBgn0003731	Egfr	0	0	0	0	0	0	1	FastEpistasis	FBgn0003731	Egfr		cell-cell adhesion ; GO:0098609 | inferred from mutant phenotype <newline> notum development ; GO:0007477 | inferred from mutant phenotype <newline> epithelial cell proliferation involved in Malpighian tubule morphogenesis ; GO:0061331 | inferred from mutant phenotype <newline> eye-antennal disc morphogenesis ; GO:0007455 | inferred from mutant phenotype <newline> negative regulation of G1/S tran…	cytoneme ; GO:0035230 | colocalizes_with inferred from direct assay <newline> integral component of plasma membrane ; GO:0005887 | inferred from biological aspect of ancestor with PANTHER:PTN002356460 <newline> basal plasma membrane ; GO:0009925 | inferred from biological aspect of ancestor with PANTHER:PTN000698827 <newline> receptor complex ; GO:0043235 | inferred from biological aspect of ance…	protein domain specific binding ; GO:0019904 | inferred from electronic annotation with InterPro:IPR000308 <newline> ATP binding ; GO:0005524 | inferred from electronic annotation with InterPro:IPR000719, InterPro:IPR006211, InterPro:IPR017441 <newline> epidermal growth factor-activated receptor activity ; GO:0005006 | inferred from direct assay <newline> protein binding ; GO:0005515 | inferred f…
FBgn0011300	babo	0	0	0	0	0	0	1	FastEpistasis	FBgn0011300	babo		protein phosphorylation ; GO:0006468 | inferred from biological aspect of ancestor with PANTHER:PTN002758232 <newline> activin receptor signaling pathway ; GO:0032924 | inferred from direct assay <newline> transforming growth factor beta receptor signaling pathway ; GO:0007179 | inferred from electronic annotation with InterPro:IPR017194 <newline> activin receptor signaling pathway ; GO:0032924 |…	receptor complex ; GO:0043235 | inferred from biological aspect of ancestor with PANTHER:PTN000583675 <newline> plasma membrane ; GO:0005886 | inferred from high throughput direct assay <newline> activin receptor complex ; GO:0048179 | inferred from physical interaction with put, wit <newline> activin receptor complex ; GO:0048179 | inferred from physical interaction with put <newline> activin re…	ATP binding ; GO:0005524 | inferred from electronic annotation with InterPro:IPR000333, InterPro:IPR000719, InterPro:IPR003605, InterPro:IPR017441 <newline> metal ion binding ; GO:0046872 | inferred from electronic annotation with InterPro:IPR017194 <newline> activin receptor activity, type I ; GO:0016361 | inferred from biological aspect of ancestor with PANTHER:PTN001147434 <newline> activin re…
FBgn0000719	fog	0	1	0	0	0	1	0	FastLMM	FBgn0000719	fog		actin-mediated cell contraction ; GO:0070252 | inferred from direct assay <newline> morphogenesis of embryonic epithelium ; GO:0016331 | inferred from mutant phenotype <newline> posterior midgut invagination ; GO:0007374 | inferred from mutant phenotype <newline> apical constriction ; GO:0003383 | inferred from mutant phenotype <newline> regulation of cell shape ; GO:0008360 | inferred from mutan…	cytoplasm ; GO:0005737 | inferred from direct assay <newline> extracellular space ; GO:0005615 | inferred from direct assay	receptor ligand activity ; GO:0048018 | inferred from direct assay <newline> G protein-coupled receptor binding ; GO:0001664 | inferred from physical interaction with mthl1
FBgn0003944	Ubx	0	0	0	1	0	0	0	FastLMM	FBgn0003944	Ubx		midgut development ; GO:0007494 | traceable author statement <newline> negative regulation of transcription by RNA polymerase II ; GO:0000122 | inferred from direct assay <newline> positive regulation of muscle organ development ; GO:0048636 | inferred from mutant phenotype <newline> muscle cell fate specification ; GO:0042694 | inferred from mutant phenotype <newline> regulation of transcription…	nucleus ; GO:0005634 | inferred from biological aspect of ancestor with PANTHER:PTN002388214 <newline> transcription factor complex ; GO:0005667 | non-traceable author statement <newline> nucleus ; GO:0005634 | inferred from direct assay <newline> polytene chromosome band ; GO:0005704 | inferred from direct assay	protein binding ; GO:0005515 | inferred from physical interaction with DIP1 <newline> RNA polymerase II proximal promoter sequence-specific DNA binding ; GO:0000978 | inferred from direct assay <newline> DNA-binding transcription factor activity, RNA polymerase II-specific ; GO:0000981 | inferred from biological aspect of ancestor with PANTHER:PTN002388214 <newline> RNA polymerase II proximal pro…
FBgn0261617	nej	0	1	0	0	0	0	0	FastEpistasis	FBgn0261617	nej		R3/R4 cell fate commitment ; GO:0007464 | inferred from mutant phenotype <newline> negative regulation of canonical Wnt signaling pathway ; GO:0090090 | inferred from mutant phenotype <newline> thermosensory behavior ; GO:0040040 | inferred from mutant phenotype <newline> regulation of mitotic nuclear division ; GO:0007088 | inferred from mutant phenotype inferred from genetic interaction with My…	polytene chromosome ; GO:0005700 | inferred from direct assay <newline> protein-containing complex ; GO:0032991 | inferred from physical interaction with ash1 <newline> protein-containing complex ; GO:0032991 | inferred from physical interaction with mod <newline> histone methyltransferase complex ; GO:0035097 | inferred from direct assay <newline> nucleoplasm ; GO:0005654 | inferred from high th…	zinc ion binding ; GO:0008270 | inferred from electronic annotation with InterPro:IPR000197, InterPro:IPR000433 <newline> histone acetyltransferase activity ; GO:0004402 | inferred from direct assay <newline> histone acetyltransferase activity (H3-K27 specific) ; GO:0044017 | inferred from direct assay <newline> cAMP response element binding protein binding ; GO:0008140 | traceable author stateme…
FBgn0003044	Pcl	1	0	0	0	0	0	0	FastEpistasis	FBgn0003044	Pcl		negative regulation of transcription, DNA-templated ; GO:0045892 | inferred from direct assay <newline> chromatin organization ; GO:0006325 | inferred from biological aspect of ancestor with PANTHER:PTN000290238 <newline> defense response to fungus ; GO:0050832 | inferred from mutant phenotype <newline> regulation of transcription, DNA-templated ; GO:0006355 | inferred from biological aspect of a…	nucleus ; GO:0005634 | inferred from direct assay <newline> nucleus ; GO:0005634 | inferred from biological aspect of ancestor with PANTHER:PTN000290238	chromatin binding ; GO:0003682 | inferred from biological aspect of ancestor with PANTHER:PTN000290238 <newline> methylated histone binding ; GO:0035064 | NOT inferred from direct assay <newline> protein binding ; GO:0005515 | inferred from physical interaction with UniProtKB:Q24338 inferred from physical interaction with UniProtKB:Q94517 inferred from physical interaction with UniProtKB:Q9NJG9 <…
FBgn0003507	srp	0	0	0	1	0	0	0	FastLMM	FBgn0003507	srp		mesodermal cell fate commitment ; GO:0001710 | inferred from mutant phenotype <newline> embryonic hemopoiesis ; GO:0035162 | inferred from mutant phenotype <newline> fat body development ; GO:0007503 | inferred from expression pattern <newline> dorsal closure ; GO:0007391 | traceable author statement <newline> embryonic heart tube development ; GO:0035050 | inferred from mutant phenotype <newline…	nucleus ; GO:0005634 | inferred from biological aspect of ancestor with PANTHER:PTN001600628	zinc ion binding ; GO:0008270 | inferred from electronic annotation with InterPro:IPR000679, InterPro:IPR013088 <newline> DNA binding ; GO:0003677 | inferred from direct assay <newline> DNA-binding transcription factor activity, RNA polymerase II-specific ; GO:0000981 | inferred from biological aspect of ancestor with PANTHER:PTN001600628 <newline> DNA binding ; GO:0003677 | traceable author stat…
FBgn0003345	sd	0	0	0	0	1	0	0	FastLMM	FBgn0003345	sd		hippo signaling ; GO:0035329 | inferred from electronic annotation with InterPro:IPR016361 <newline> imaginal disc-derived leg morphogenesis ; GO:0007480 | inferred from mutant phenotype <newline> cardiac muscle cell development ; GO:0055013 | inferred from mutant phenotype <newline> imaginal disc-derived wing morphogenesis ; GO:0007476 | inferred from mutant phenotype <newline> negative regulati…	nucleus ; GO:0005634 | inferred from direct assay <newline> transcription factor complex ; GO:0005667 | inferred from biological aspect of ancestor with PANTHER:PTN000216669 <newline> RNA polymerase II transcription factor complex ; GO:0090575 | inferred from physical interaction with yki, mask <newline> nucleus ; GO:0005634 | inferred from biological aspect of ancestor with PANTHER:PTN000216669	protein binding ; GO:0005515 | inferred from physical interaction with UniProtKB:Q45VV3 <newline> protein domain specific binding ; GO:0019904 | inferred from physical interaction with UniProtKB:Q26366 <newline> RNA polymerase II transcription factor binding ; GO:0001085 | inferred from biological aspect of ancestor with PANTHER:PTN000216669 <newline> RNA polymerase II proximal promoter sequence-…
FBgn0053554	Nipped-A	1	0	0	0	0	0	0	FastEpistasis	FBgn0053554	Nipped-A		wing disc pattern formation ; GO:0035222 | inferred from genetic interaction with mam inferred from genetic interaction with N <newline> DNA repair ; GO:0006281 | inferred from biological aspect of ancestor with PANTHER:PTN000124276 <newline> mitotic cytokinesis ; GO:0000281 | inferred from mutant phenotype <newline> histone acetylation ; GO:0016573 | inferred from direct assay <newline> transcri…	nucleus ; GO:0005634 | inferred from direct assay <newline> NuA4 histone acetyltransferase complex ; GO:0035267 | inferred from biological aspect of ancestor with PANTHER:PTN000124276 <newline> nucleus ; GO:0005634 | inferred from biological aspect of ancestor with PANTHER:PTN000124197 <newline> polytene chromosome puff ; GO:0005703 | inferred from direct assay <newline> NuA4 histone acetyltransf…	transcription coregulator activity ; GO:0003712 | inferred from biological aspect of ancestor with PANTHER:PTN000124276 <newline> histone acetyltransferase activity ; GO:0004402 | contributes_to inferred from direct assay
FBgn0259176	bun	0	0	0	0	0	0	1	FastLMM_FastEpistasis	FBgn0259176	bun		regulation of transcription, DNA-templated ; GO:0006355 | inferred from electronic annotation with InterPro:IPR000580 <newline> ovarian follicle cell development ; GO:0030707 | traceable author statement <newline> negative regulation of apoptotic process ; GO:0043066 | inferred from mutant phenotype <newline> positive regulation of neuroblast proliferation ; GO:0002052 | inferred from mutant phen…	cytosol ; GO:0005829 | inferred from high throughput direct assay <newline> cytosol ; GO:0005829 | inferred from direct assay	DNA-binding transcription factor activity ; GO:0003700 | inferred from electronic annotation with InterPro:IPR000580 <newline> protein homodimerization activity ; GO:0042803 | inferred from sequence or structural similarity
FBgn0003330	Sce	0	0	0	1	0	0	0	FastEpistasis	FBgn0003330	Sce		chromatin silencing ; GO:0006342 | inferred from direct assay <newline> ovarian follicle cell stalk formation ; GO:0030713 | inferred from mutant phenotype <newline> neurogenesis ; GO:0022008 | inferred from mutant phenotype <newline> germarium-derived female germ-line cyst encapsulation ; GO:0030708 | inferred from mutant phenotype <newline> histone H2A monoubiquitination ; GO:0035518 | inferred…	condensed chromosome, centromeric region ; GO:0000779 | NOT inferred from direct assay <newline> nucleus ; GO:0005634 | inferred from direct assay <newline> PRC1 complex ; GO:0035102 | inferred from direct assay <newline> PRC1 complex ; GO:0035102 | traceable author statement <newline> PcG protein complex ; GO:0031519 | inferred from direct assay <newline> ubiquitin ligase complex ; GO:0000151 | …	ubiquitin protein ligase activity ; GO:0061630 | inferred from biological aspect of ancestor with PANTHER:PTN000743780 <newline> chromatin binding ; GO:0003682 | inferred from biological aspect of ancestor with PANTHER:PTN000743780 <newline> ubiquitin-protein transferase activity ; GO:0004842 | contributes_to inferred from sequence or structural similarity with HGNC:10061 <newline> protein bindin…
FBgn0004652	fru	0	0	0	0	0	0	1	FastLMM	FBgn0004652	fru		male mating behavior ; GO:0060179 | inferred from mutant phenotype <newline> male courtship behavior ; GO:0008049 | inferred from mutant phenotype <newline> copulation ; GO:0007620 | non-traceable author statement <newline> mating behavior ; GO:0007617 | inferred from mutant phenotype <newline> male courtship behavior, veined wing vibration ; GO:0016545 | inferred from mutant phenotype <newline> …	nucleus ; GO:0005634 | inferred from biological aspect of ancestor with PANTHER:PTN001135010	nucleic acid binding ; GO:0003676 | inferred from electronic annotation with InterPro:IPR013087 <newline> DNA-binding transcription factor activity ; GO:0003700 | traceable author statement <newline> DNA-binding transcription factor activity ; GO:0003700 | non-traceable author statement
FBgn0035934	TrpA1	0	0	1	0	0	0	0	FastLMM	FBgn0035934	TrpA1		cellular response to heat ; GO:0034605 | inferred from direct assay <newline> response to heat ; GO:0009408 | inferred from direct assay <newline> thermotaxis ; GO:0043052 | inferred from mutant phenotype <newline> cation transport ; GO:0006812 | inferred from direct assay <newline> neuronal signal transduction ; GO:0023041 | inferred from mutant phenotype <newline> mechanosensory behavior ; GO:0…	cation channel complex ; GO:0034703 | inferred from direct assay <newline> integral component of membrane ; GO:0016021 | inferred by curator from GO:0005261	bitter taste receptor activity ; GO:0033038 | NOT inferred from direct assay <newline> temperature-gated cation channel activity ; GO:0097604 | inferred from direct assay <newline> ligand-gated ion channel activity ; GO:0015276 | inferred from direct assay <newline> calcium channel activity ; GO:0005262 | inferred from direct assay <newline> cation channel activity ; GO:0005261 | inferred from di…
FBgn0013469	klu	0	0	0	1	0	0	0	FastEpistasis	FBgn0013469	klu		positive regulation of neuroblast proliferation ; GO:0002052 | inferred from mutant phenotype <newline> R7 cell differentiation ; GO:0045466 | inferred from direct assay <newline> neurogenesis ; GO:0022008 | inferred from mutant phenotype <newline> regulation of neuroblast proliferation ; GO:1902692 | inferred from genetic interaction with UniProtKB:Q9VQ56 <newline> neuronal stem cell population …	nucleus ; GO:0005634 | inferred from direct assay	enhancer binding ; GO:0035326 | inferred from direct assay <newline> sequence-specific DNA binding ; GO:0043565 | inferred from mutant phenotype <newline> DNA-binding transcription repressor activity, RNA polymerase II-specific ; GO:0001227 | inferred from direct assay <newline> RNA polymerase II regulatory region sequence-specific DNA binding ; GO:0000977 | inferred from direct assay
FBgn0003118	pnt	0	0	0	0	0	1	0	FastEpistasis	FBgn0003118	pnt		cell differentiation ; GO:0030154 | inferred from biological aspect of ancestor with PANTHER:PTN000218930 <newline> regulation of transcription by RNA polymerase II ; GO:0006357 | inferred from biological aspect of ancestor with PANTHER:PTN000218930 <newline> photoreceptor cell development ; GO:0042461 | inferred from mutant phenotype inferred from genetic interaction with UniProtKB:P08646 inferr…	nucleus ; GO:0005634 | inferred from biological aspect of ancestor with PANTHER:PTN000218930 <newline> nucleus ; GO:0005634 | inferred from direct assay <newline> nucleus ; GO:0005634 | inferred from mutant phenotype	DNA-binding transcription activator activity, RNA polymerase II-specific ; GO:0001228 | inferred from direct assay <newline> sequence-specific DNA binding ; GO:0043565 | inferred from direct assay <newline> protein binding ; GO:0005515 | inferred from physical interaction with edl <newline> DNA-binding transcription factor activity, RNA polymerase II-specific ; GO:0000981 | inferred from biologic…
FBgn0285896	btl	0	0	0	1	0	1	0	FastLMM	FBgn0285896	btl		open tracheal system development ; GO:0007424 | inferred from mutant phenotype <newline> tracheal pit formation in open tracheal system ; GO:0035202 | inferred from mutant phenotype <newline> epithelial cell migration, open tracheal system ; GO:0007427 | inferred from mutant phenotype <newline> tracheal outgrowth, open tracheal system ; GO:0007426 | inferred from mutant phenotype <newline> termin…	cytoneme ; GO:0035230 | colocalizes_with inferred from direct assay <newline> plasma membrane ; GO:0005886 | inferred from direct assay <newline> cytoneme ; GO:0035230 | inferred from direct assay <newline> receptor complex ; GO:0043235 | inferred from biological aspect of ancestor with PANTHER:PTN002356460 <newline> integral component of plasma membrane ; GO:0005887 | inferred from biological as…	ATP binding ; GO:0005524 | inferred from electronic annotation with InterPro:IPR000719, InterPro:IPR017441 <newline> protein binding ; GO:0005515 | inferred from physical interaction with stumps <newline> transmembrane receptor protein tyrosine kinase activity ; GO:0004714 | inferred from biological aspect of ancestor with PANTHER:PTN002356460 <newline> fibroblast growth factor-activated receptor…
FBgn0260003	Dys	0	0	0	0	0	1	0	FastLMM	FBgn0260003	Dys		regulation of short-term neuronal synaptic plasticity ; GO:0048172 | inferred from direct assay <newline> imaginal disc-derived wing vein morphogenesis ; GO:0008586 | inferred from mutant phenotype <newline> muscle cell cellular homeostasis ; GO:0046716 | inferred from mutant phenotype <newline> regulation of neurotransmitter secretion ; GO:0046928 | inferred from direct assay <newline> imaginal …	synapse ; GO:0045202 | inferred from direct assay <newline> dystrophin-associated glycoprotein complex ; GO:0016010 | inferred from physical interaction with Dg <newline> cytoskeleton ; GO:0005856 | inferred from direct assay <newline> cytoplasm ; GO:0005737 | inferred from high throughput direct assay <newline> dystrophin-associated glycoprotein complex ; GO:0016010 | inferred from sequence or s…	zinc ion binding ; GO:0008270 | inferred from electronic annotation with InterPro:IPR000433 <newline> WW domain binding ; GO:0050699 | inferred from physical interaction with Dg <newline> structural constituent of muscle ; GO:0008307 | inferred from sequence or structural similarity with HGNC:12635 inferred from sequence or structural similarity with HGNC:2928 inferred from sequence or structural…
FBgn0000256	capu	0	0	0	0	0	0	1	FastLMM	FBgn0000256	capu		actin nucleation ; GO:0045010 | inferred from direct assay <newline> actin filament-based process ; GO:0030029 | inferred from direct assay <newline> pole plasm RNA localization ; GO:0007316 | inferred from mutant phenotype <newline> pole plasm assembly ; GO:0007315 | inferred from high throughput mutant phenotype <newline> pole plasm assembly ; GO:0007315 | inferred from mutant phenotype <newlin…	actin filament ; GO:0005884 | inferred from electronic annotation with InterPro:IPR001265 <newline> cytoplasm ; GO:0005737 | inferred from biological aspect of ancestor with PANTHER:PTN001771547 <newline> cytoplasm ; GO:0005737 | inferred from direct assay <newline> cell cortex ; GO:0005938 | inferred from direct assay	microtubule binding ; GO:0008017 | inferred from direct assay <newline> microtubule binding ; GO:0008017 | inferred from mutant phenotype <newline> microtubule binding ; GO:0008017 | inferred from biological aspect of ancestor with PANTHER:PTN001771547
FBgn0266464	Nsf2	0	0	0	0	0	1	0	FastEpistasis	FBgn0266464	Nsf2		liquid clearance, open tracheal system ; GO:0035002 | inferred from high throughput mutant phenotype <newline> terminal branching, open tracheal system ; GO:0007430 | inferred from high throughput mutant phenotype <newline> open tracheal system development ; GO:0007424 | inferred from high throughput mutant phenotype <newline> regulation of synaptic growth at neuromuscular junction ; GO:0008582 |…	Golgi stack ; GO:0005795 | inferred from biological aspect of ancestor with PANTHER:PTN000554891 <newline> cytoplasm ; GO:0005737 | non-traceable author statement <newline> cytoplasm ; GO:0005737 | inferred from sequence or structural similarity with comt	ATP binding ; GO:0005524 | inferred from electronic annotation with InterPro:IPR003959, InterPro:IPR003960 <newline> ATPase activity ; GO:0016887 | inferred from sequence or structural similarity with comt <newline> ATPase activity ; GO:0016887 | inferred from biological aspect of ancestor with PANTHER:PTN000554891
FBgn0000097	aop	0	0	0	0	0	0	1	FastLMM	FBgn0000097	aop		negative regulation of transcription by RNA polymerase II ; GO:0000122 | inferred from mutant phenotype <newline> negative regulation of R7 cell differentiation ; GO:0045677 | inferred from genetic interaction with Ras85D <newline> sevenless signaling pathway ; GO:0045500 | inferred from mutant phenotype <newline> fibroblast growth factor receptor signaling pathway ; GO:0008543 | inferred from mu…	nucleus ; GO:0005634 | inferred from direct assay <newline> cytosol ; GO:0005829 | inferred from high throughput direct assay <newline> cytosol ; GO:0005829 | inferred from direct assay <newline> nucleus ; GO:0005634 | inferred from mutant phenotype <newline> nucleoplasm ; GO:0005654 | inferred from high throughput direct assay <newline> cytoplasm ; GO:0005737 | inferred from direct assay <newlin…	protein domain specific binding ; GO:0019904 | inferred from physical interaction with Fbl6 <newline> protein binding ; GO:0005515 | inferred from physical interaction with edl <newline> DNA-binding transcription repressor activity, RNA polymerase II-specific ; GO:0001227 | inferred from direct assay <newline> DNA binding ; GO:0003677 | inferred from direct assay <newline> DNA-binding transcripti…
FBgn0259211	grh	0	1	0	0	0	0	0	FastEpistasis	FBgn0259211	grh		ventral cord development ; GO:0007419 | non-traceable author statement <newline> chitin-based cuticle development ; GO:0040003 | inferred from mutant phenotype <newline> positive regulation of transcription by RNA polymerase II ; GO:0045944 | inferred from expression pattern <newline> rhabdomere development ; GO:0042052 | inferred from mutant phenotype <newline> epithelial cell morphogenesis ; GO…	nucleus ; GO:0005634 | inferred from direct assay <newline> nucleus ; GO:0005634 | inferred from biological aspect of ancestor with PANTHER:PTN000112980	sequence-specific DNA binding ; GO:0043565 | inferred from direct assay <newline> DNA binding ; GO:0003677 | inferred from direct assay <newline> sequence-specific DNA binding ; GO:0043565 | inferred from biological aspect of ancestor with PANTHER:PTN000867451 <newline> DNA-binding transcription factor activity ; GO:0003700 | inferred from direct assay <newline> DNA-binding transcription factor a…
FBgn0000464	Lar	0	0	1	0	0	0	0	FastLMM	FBgn0000464	Lar		motor neuron axon guidance ; GO:0008045 | inferred from mutant phenotype <newline> axon extension ; GO:0048675 | inferred from mutant phenotype <newline> axon guidance ; GO:0007411 | inferred from mutant phenotype <newline> positive regulation of plasma membrane bounded cell projection assembly ; GO:0120034 | inferred from mutant phenotype <newline> oogenesis ; GO:0048477 | inferred from mutant p…	focal adhesion ; GO:0005925 | inferred from direct assay <newline> basal plasma membrane ; GO:0009925 | inferred from direct assay <newline> axon ; GO:0030424 | inferred from direct assay <newline> cell leading edge ; GO:0031252 | inferred from direct assay <newline> axon ; GO:0030424 |	transmembrane receptor protein tyrosine phosphatase activity ; GO:0005001 | inferred from direct assay <newline> SAM domain binding ; GO:0032093 | inferred from physical interaction with ckn <newline> SAM domain binding ; GO:0032093 | inferred from physical interaction with Liprin-Œ≥ <newline> protein tyrosine phosphatase activity ; GO:0004725 | inferred from biological aspect of ancestor with PA…
FBgn0004595	pros	0	0	0	0	0	0	1	FastLMM	FBgn0004595	pros		sensory perception of taste ; GO:0050909 | inferred from mutant phenotype <newline> peripheral nervous system development ; GO:0007422 | inferred from mutant phenotype <newline> glial cell differentiation ; GO:0010001 | inferred from mutant phenotype <newline> cell fate commitment ; GO:0045165 | inferred from mutant phenotype <newline> dendrite morphogenesis ; GO:0048813 | inferred from mutant ph…	nucleus ; GO:0005634 | inferred from direct assay <newline> nucleus ; GO:0005634 | inferred from biological aspect of ancestor with PANTHER:PTN000258074 <newline> apical cortex ; GO:0045179 | inferred from direct assay <newline> plasma membrane ; GO:0005886 | inferred from direct assay <newline> basal cortex ; GO:0045180 | inferred from direct assay <newline> cell cortex ; GO:0005938 | inferred f…	DNA binding ; GO:0003677 | inferred from direct assay <newline> DNA-binding transcription factor activity ; GO:0003700 | non-traceable author statement <newline> DNA-binding transcription repressor activity, RNA polymerase II-specific ; GO:0001227 | inferred from mutant phenotype <newline> DNA-binding transcription factor activity ; GO:0003700 | inferred from mutant phenotype <newline> sequence-s…
FBgn0265598	Bx	0	0	0	0	1	0	0	FastEpistasis	FBgn0265598	Bx		leg disc development ; GO:0035218 | inferred from mutant phenotype <newline> positive regulation of transcription, DNA-templated ; GO:0045893 | inferred from mutant phenotype <newline> imaginal disc-derived wing morphogenesis ; GO:0007476 | inferred from mutant phenotype inferred from genetic interaction with ap <newline> chaeta development ; GO:0022416 | inferred from mutant phenotype <newline> …	nucleus ; GO:0005634 | non-traceable author statement	protein binding ; GO:0005515 | inferred from physical interaction with pnr inferred from physical interaction with chianti
FBgn0004198	ct	0	0	0	1	0	0	0	FastEpistasis	FBgn0004198	ct		female gonad development ; GO:0008585 | traceable author statement <newline> Golgi vesicle transport ; GO:0048193 | inferred from biological aspect of ancestor with PANTHER:PTN000361901 <newline> negative regulation of transcription by RNA polymerase II ; GO:0000122 | inferred from mutant phenotype <newline> dendrite guidance ; GO:0070983 | inferred from mutant phenotype <newline> antennal develo…	nucleus ; GO:0005634 | inferred from biological aspect of ancestor with PANTHER:PTN001019067 <newline> nucleus ; GO:0005634 | inferred from direct assay <newline> Golgi membrane ; GO:0000139 | inferred from biological aspect of ancestor with PANTHER:PTN000361901	RNA polymerase II regulatory region sequence-specific DNA binding ; GO:0000977 | inferred from biological aspect of ancestor with PANTHER:PTN001019067 <newline> transcription regulatory region sequence-specific DNA binding ; GO:0000976 | inferred from direct assay <newline> DNA binding ; GO:0003677 | traceable author statement
FBgn0023214	edl	0	0	0	0	0	1	0	FastLMM	FBgn0023214	edl		negative regulation of epidermal growth factor receptor signaling pathway ; GO:0042059 | inferred from mutant phenotype <newline> regulation of phosphorylation ; GO:0042325 | inferred from direct assay <newline> negative regulation of DNA-binding transcription factor activity ; GO:0043433 | inferred from genetic interaction with pnt <newline> embryonic pattern specification ; GO:0009880 | inferre…	nucleus ; GO:0005634 | inferred from biological aspect of ancestor with PANTHER:PTN000218930	sequence-specific DNA binding ; GO:0043565 | inferred from electronic annotation with InterPro:IPR003118 <newline> activating transcription factor binding ; GO:0033613 | inferred from physical interaction with pnt <newline> DNA-binding transcription factor activity, RNA polymerase II-specific ; GO:0000981 | inferred from biological aspect of ancestor with PANTHER:PTN000218930 <newline> protein bi…
FBgn0262582	cic	0	0	0	0	1	0	0	FastLMM	FBgn0262582	cic		torso signaling pathway ; GO:0008293 | inferred from direct assay <newline> regulation of transcription, DNA-templated ; GO:0006355 | inferred from mutant phenotype <newline> negative regulation of transcription by RNA polymerase II ; GO:0000122 | inferred from direct assay <newline> negative regulation of cell growth ; GO:0030308 | inferred from mutant phenotype <newline> eye morphogenesis ; GO:…	nucleus ; GO:0005634 | inferred from direct assay <newline> cytosol ; GO:0005829 | inferred from direct assay <newline> nucleus ; GO:0005634 | inferred from biological aspect of ancestor with PANTHER:PTN000316564	RNA polymerase II regulatory region sequence-specific DNA binding ; GO:0000977 | inferred from direct assay <newline> DNA-binding transcription repressor activity, RNA polymerase II-specific ; GO:0001227 | inferred from mutant phenotype <newline> repressing transcription factor binding ; GO:0070491 | inferred from physical interaction with gro <newline> sequence-specific DNA binding ; GO:0043565 …
FBgn0261811	pico	1	0	0	0	0	0	0	FastEpistasis	FBgn0261811	pico		signal transduction ; GO:0007165 | inferred from electronic annotation with InterPro:IPR000159 <newline> positive regulation of filopodium assembly ; GO:0051491 | inferred from direct assay <newline> regulation of cell size ; GO:0008361 | inferred from mutant phenotype <newline> positive regulation of developmental growth ; GO:0048639 | inferred from mutant phenotype <newline> imaginal disc devel…	filopodium tip ; GO:0032433 | colocalizes_with inferred from direct assay	protein domain specific binding ; GO:0019904 | inferred from physical interaction with UniProtKB:M9MRI4 <newline> protein phosphatase 1 binding ; GO:0008157 | inferred from physical interaction with flw inferred from physical interaction with Pp1-13C inferred from physical interaction with Pp1Œ±-96A inferred from physical interaction with Pp1-87B
FBgn0259481	Mob2	0	0	0	0	0	1	0	FastLMM	FBgn0259481	Mob2		long-term memory ; GO:0007616 | inferred from mutant phenotype <newline> rhabdomere development ; GO:0042052 | inferred from mutant phenotype <newline> negative regulation of synaptic growth at neuromuscular junction ; GO:0045886 | inferred from mutant phenotype <newline> cell morphogenesis ; GO:0000902 | inferred from mutant phenotype	cytoplasm ; GO:0005737 | inferred from direct assay <newline> plasma membrane ; GO:0005886 | inferred from direct assay <newline> rhabdomere ; GO:0016028 | inferred from direct assay <newline> cell hair ; GO:0070451 | inferred from direct assay <newline> cell periphery ; GO:0071944 | inferred from direct assay	protein kinase binding ; GO:0019901 | inferred from physical interaction with trc <newline> protein binding ; GO:0005515 | inferred from physical interaction with UniProtKB:Q9NBK5
FBgn0031016	kek5	0	0	0	0	0	1	0	FastEpistasis	FBgn0031016	kek5		negative regulation of BMP signaling pathway ; GO:0030514 | inferred from mutant phenotype <newline> negative regulation of epidermal growth factor receptor signaling pathway ; GO:0042059 | NOT inferred from mutant phenotype	integral component of plasma membrane ; GO:0005887 | inferred from sequence model <newline> integral component of plasma membrane ; GO:0005887 | inferred from direct assay	-
FBgn0085450	Snoo	0	1	0	1	0	0	0	FastLMM	FBgn0085450	Snoo		negative regulation of BMP signaling pathway ; GO:0030514 | inferred from mutant phenotype <newline> dendrite morphogenesis ; GO:0048813 | inferred from mutant phenotype <newline> positive regulation of activin receptor signaling pathway ; GO:0032927 | inferred from mutant phenotype <newline> negative regulation of BMP signaling pathway ; GO:0030514 | inferred from genetic interaction with tkv <n…	nucleus ; GO:0005634 | inferred from biological aspect of ancestor with PANTHER:PTN000000299 <newline> cytosol ; GO:0005829 | inferred from direct assay <newline> nucleus ; GO:0005634 | inferred from direct assay	co-SMAD binding ; GO:0070410 | inferred from direct assay
FBgn0003169	put	0	0	0	1	0	0	0	FastLMM	FBgn0003169	put		activin receptor signaling pathway ; GO:0032924 | inferred from direct assay <newline> activin receptor signaling pathway ; GO:0032924 | inferred from mutant phenotype <newline> dorsal closure ; GO:0007391 | inferred from mutant phenotype <newline> wing disc pattern formation ; GO:0035222 | inferred from mutant phenotype <newline> compound eye morphogenesis ; GO:0001745 | non-traceable author sta…	BMP receptor complex ; GO:0070724 | inferred from physical interaction with sax <newline> activin receptor complex ; GO:0048179 | inferred from physical interaction with babo <newline> plasma membrane ; GO:0005886 | inferred from biological aspect of ancestor with PANTHER:PTN002758232 <newline> receptor complex ; GO:0043235 | inferred from biological aspect of ancestor with PANTHER:PTN000583675 <…	ATP binding ; GO:0005524 | inferred from electronic annotation with InterPro:IPR000333, InterPro:IPR000719 <newline> transforming growth factor beta-activated receptor activity ; GO:0005024 | inferred from genetic interaction with dpp <newline> activin receptor activity, type II ; GO:0016362 | inferred from mutant phenotype <newline> activin-activated receptor activity ; GO:0017002 | inferred fro…
FBgn0284408	trol	0	0	0	1	0	0	0	FastEpistasis	FBgn0284408	trol		positive regulation of fibroblast growth factor receptor signaling pathway ; GO:0045743 | inferred from genetic interaction with bnl <newline> tissue development ; GO:0009888 | inferred from biological aspect of ancestor with PANTHER:PTN002576803 <newline> maintenance of epithelial cell apical/basal polarity ; GO:0045199 | inferred from mutant phenotype <newline> response to anesthetic ; GO:00723…	basement membrane ; GO:0005604 | inferred from biological aspect of ancestor with PANTHER:PTN002471709 <newline> basement membrane ; GO:0005604 | inferred from direct assay <newline> basement membrane ; GO:0005604 | inferred from sequence or structural similarity	-
FBgn0014343	mirr	0	0	0	0	0	1	0	FastLMM	FBgn0014343	mirr		dorsal appendage formation ; GO:0046843 | inferred from mutant phenotype <newline> positive regulation of transcription, DNA-templated ; GO:0045893 | inferred from sequence or structural similarity with exd inferred from sequence or structural similarity with caup <newline> equator specification ; GO:0045317 | inferred from mutant phenotype <newline> compound eye morphogenesis ; GO:0001745 | infe…	nucleus ; GO:0005634 | inferred from electronic annotation with InterPro:IPR003893	sequence-specific DNA binding ; GO:0043565 | inferred from electronic annotation with InterPro:IPR017970 <newline> DNA-binding transcription factor activity, RNA polymerase II-specific ; GO:0000981 | inferred from sequence or structural similarity with exd <newline> DNA-binding transcription factor activity, RNA polymerase II-specific ; GO:0000981 | inferred from direct assay <newline> protein ho…
FBgn0026206	mei-P26	0	0	0	1	0	0	0	FastLMM	FBgn0026206	mei-P26		spermatogenesis ; GO:0007283 | inferred from mutant phenotype inferred from genetic interaction with UniProtKB:Q9V4Q8 <newline> gamete generation ; GO:0007276 | inferred from mutant phenotype <newline> germ cell development ; GO:0007281 | inferred from genetic interaction with bam <newline> meiotic cell cycle ; GO:0051321 | inferred from mutant phenotype <newline> protein ubiquitination ; GO:0016…	cytoplasm ; GO:0005737 | inferred from sequence or structural similarity with MGI:MGI:1860040	zinc ion binding ; GO:0008270 | inferred from electronic annotation with InterPro:IPR000315, InterPro:IPR001841 <newline> ubiquitin protein ligase activity ; GO:0061630 | inferred from sequence or structural similarity with UniProtKB:Q80VI1 <newline> zinc ion binding ; GO:0008270 | inferred from sequence model <newline> ubiquitin-protein transferase activity ; GO:0004842 | inferred from sequence …
FBgn0035756	unc-13-4A	0	0	0	0	0	0	1	FastEpistasis	FBgn0035756	unc-13-4A		synaptic vesicle priming ; GO:0016082 | non-traceable author statement <newline> neurotransmitter secretion ; GO:0007269 | non-traceable author statement	synaptic vesicle ; GO:0008021 | non-traceable author statement	-
FBgn0011656	Mef2	0	0	0	0	0	0	1	FastLMM	FBgn0011656	Mef2		locomotor rhythm ; GO:0045475 | inferred from mutant phenotype <newline> myoblast fusion ; GO:0007520 | inferred from mutant phenotype <newline> skeletal muscle tissue development ; GO:0007519 | inferred from mutant phenotype <newline> anterior midgut development ; GO:0007496 | inferred from mutant phenotype <newline> muscle fiber development ; GO:0048747 | inferred from mutant phenotype <newline…	nucleus ; GO:0005634 | inferred from direct assay <newline> nuclear chromatin ; GO:0000790 | inferred from biological aspect of ancestor with PANTHER:PTN002278664 <newline> nucleus ; GO:0005634 | inferred from biological aspect of ancestor with PANTHER:PTN000235373	protein dimerization activity ; GO:0046983 | inferred from electronic annotation with InterPro:IPR002100 <newline> DNA-binding transcription activator activity, RNA polymerase II-specific ; GO:0001228 | inferred from mutant phenotype <newline> RNA polymerase II proximal promoter sequence-specific DNA binding ; GO:0000978 | inferred from biological aspect of ancestor with PANTHER:PTN002278664 <new…
FBgn0031461	daw	0	1	0	0	0	0	0	FastEpistasis	FBgn0031461	daw		activin receptor signaling pathway ; GO:0032924 | inferred from direct assay <newline> keratinocyte differentiation ; GO:0030216 | inferred from electronic annotation with InterPro:IPR009733 <newline> cellular response to nutrient levels ; GO:0031669 | inferred from mutant phenotype <newline> regulation of synapse structure or activity ; GO:0050803 | inferred from mutant phenotype <newline> posit…	cornified envelope ; GO:0001533 | inferred from electronic annotation with InterPro:IPR009733 <newline> extracellular space ; GO:0005615 | inferred by curator from GO:0005179 <newline> extracellular space ; GO:0005615 | inferred from biological aspect of ancestor with PANTHER:PTN000218063	growth factor activity ; GO:0008083 | inferred from electronic annotation with InterPro:IPR001111, InterPro:IPR001839, InterPro:IPR017948 <newline> hormone activity ; GO:0005179 | inferred from mutant phenotype <newline> receptor ligand activity ; GO:0048018 | inferred from direct assay <newline> cytokine activity ; GO:0005125 | inferred from biological aspect of ancestor with PANTHER:PTN000218063
FBgn0011224	heph	0	0	0	0	0	1	0	FastEpistasis	FBgn0011224	heph		mRNA processing ; GO:0006397 | inferred from electronic annotation with InterPro:IPR006536 <newline> spermatid development ; GO:0007286 | inferred from mutant phenotype <newline> imaginal disc-derived wing vein morphogenesis ; GO:0008586 | inferred from mutant phenotype <newline> imaginal disc-derived wing margin morphogenesis ; GO:0008587 | inferred from mutant phenotype <newline> negative regul…	cytosol ; GO:0005829 | inferred from high throughput direct assay <newline> nucleus ; GO:0005634 | inferred from biological aspect of ancestor with PANTHER:PTN002538397 <newline> ribonucleoprotein complex ; GO:1990904 | inferred from direct assay <newline> cytoplasm ; GO:0005737 | inferred from direct assay <newline> nucleus ; GO:0005634 | inferred from high throughput direct assay	mRNA binding ; GO:0003729 | inferred from sequence or structural similarity <newline> translation repressor activity, mRNA regulatory element binding ; GO:0000900 | inferred from mutant phenotype <newline> mRNA binding ; GO:0003729 | inferred from biological aspect of ancestor with PANTHER:PTN002538397 <newline> mRNA 3'-UTR binding ; GO:0003730 | inferred from direct assay
FBgn0035142	Hipk	0	0	1	0	0	0	0	FastLMM	FBgn0035142	Hipk		imaginal disc-derived wing vein morphogenesis ; GO:0008586 | inferred from mutant phenotype <newline> positive regulation of canonical Wnt signaling pathway ; GO:0090263 | inferred from mutant phenotype <newline> protein stabilization ; GO:0050821 | inferred from mutant phenotype <newline> protein phosphorylation ; GO:0006468 | inferred from direct assay <newline> positive regulation of gene expr…	cytoplasm ; GO:0005737 | inferred from biological aspect of ancestor with PANTHER:PTN000624409 <newline> nucleus ; GO:0005634 | inferred from direct assay <newline> nucleus ; GO:0005634 | inferred from biological aspect of ancestor with PANTHER:PTN000624411	ATP binding ; GO:0005524 | inferred from electronic annotation with InterPro:IPR000719, InterPro:IPR002290, InterPro:IPR017441 <newline> protein serine/threonine kinase activity ; GO:0004674 | inferred from direct assay <newline> beta-catenin binding ; GO:0008013 | inferred from physical interaction with arm <newline> protein serine/threonine kinase activity ; GO:0004674 | inferred from biologica…
FBgn0010473	tutl	0	0	0	0	1	0	0	FastEpistasis	FBgn0010473	tutl		R7 cell development ; GO:0045467 | inferred from mutant phenotype inferred from genetic interaction with bdl <newline> adult locomotory behavior ; GO:0008344 | inferred from mutant phenotype <newline> dendrite self-avoidance ; GO:0070593 | inferred from biological aspect of ancestor with PANTHER:PTN001296633 <newline> dendrite self-avoidance ; GO:0070593 | inferred from mutant phenotype <newline>…	integral component of plasma membrane ; GO:0005887 | inferred by curator from GO:0098632 <newline> axon ; GO:0030424 | inferred from biological aspect of ancestor with PANTHER:PTN001296633 <newline> plasma membrane ; GO:0005886 | inferred from biological aspect of ancestor with PANTHER:PTN001296633	cell-cell adhesion mediator activity ; GO:0098632 | inferred from biological aspect of ancestor with PANTHER:PTN001296633 <newline> cell-cell adhesion mediator activity ; GO:0098632 | inferred from physical interaction with bdl
FBgn0011661	Moe	0	0	0	0	0	1	0	FastEpistasis	FBgn0011661	Moe		oocyte anterior/posterior axis specification ; GO:0007314 | inferred from mutant phenotype <newline> regulation of cell shape ; GO:0008360 | inferred from mutant phenotype <newline> positive regulation of mitotic spindle elongation ; GO:1902846 | inferred from mutant phenotype <newline> pole plasm protein localization ; GO:0007318 | traceable author statement <newline> establishment or maintenanc…	cell cortex ; GO:0005938 | inferred from direct assay <newline> cytoplasm ; GO:0005737 | inferred from direct assay <newline> plasma membrane ; GO:0005886 | non-traceable author statement <newline> mitotic spindle midzone ; GO:1990023 | inferred from direct assay <newline> cytosol ; GO:0005829 | inferred from direct assay <newline> plasma membrane ; GO:0005886 | inferred from direct assay <newlin…	microtubule binding ; GO:0008017 | inferred from mutant phenotype <newline> phosphatidylinositol-4,5-bisphosphate binding ; GO:0005546 | inferred from direct assay <newline> actin binding ; GO:0003779 | non-traceable author statement <newline> actin binding ; GO:0003779 | inferred from direct assay <newline> protein binding ; GO:0005515 | inferred from physical interaction with Mer <newline> prot…
FBgn0264493	rdx	1	1	0	0	0	1	0	FastLMM	FBgn0264493	rdx		segment polarity determination ; GO:0007367 | inferred from mutant phenotype <newline> regulation of proteolysis ; GO:0030162 | inferred from biological aspect of ancestor with PANTHER:PTN000698163 <newline> protein ubiquitination ; GO:0016567 | inferred from direct assay <newline> eye morphogenesis ; GO:0048592 | inferred from mutant phenotype <newline> negative regulation of smoothened signalin…	nucleus ; GO:0005634 | inferred from biological aspect of ancestor with PANTHER:PTN000698511 <newline> cytoplasm ; GO:0005737 | inferred from biological aspect of ancestor with PANTHER:PTN000698163 <newline> nucleus ; GO:0005634 | inferred from direct assay	ubiquitin protein ligase binding ; GO:0031625 | inferred from biological aspect of ancestor with PANTHER:PTN000698163 <newline> protein binding ; GO:0005515 | inferred from physical interaction with UniProtKB:P19538 inferred from physical interaction with UniProtKB:Q9V475 <newline> protein homodimerization activity ; GO:0042803 | inferred from direct assay <newline> protein binding ; GO:0005515 |…
FBgn0010415	Sdc	1	1	0	0	0	0	0	FastLMM	FBgn0010415	Sdc		axon guidance ; GO:0007411 | inferred from mutant phenotype <newline> positive regulation of synaptic growth at neuromuscular junction ; GO:0045887 | inferred from mutant phenotype <newline> glial cell development ; GO:0021782 | inferred from mutant phenotype <newline> epithelial cell migration, open tracheal system ; GO:0007427 | inferred from mutant phenotype <newline> motor neuron axon guidanc…	membrane ; GO:0016020 | inferred from electronic annotation with InterPro:IPR001050 <newline> perivitelline space ; GO:0098595 | inferred from high throughput direct assay <newline> synapse ; GO:0045202 | inferred from direct assay <newline> neuromuscular junction ; GO:0031594 | inferred from mutant phenotype <newline> neuromuscular junction ; GO:0031594 | inferred from direct assay <newline> cel…	-
FBgn0015513	mbc	0	0	0	0	1	0	0	FastLMM	FBgn0015513	mbc		positive regulation of border follicle cell migration ; GO:1903688 | inferred from mutant phenotype <newline> activation of GTPase activity ; GO:0090630 | inferred from genetic interaction with Rac1, Rac2, Ced-12 inferred from genetic interaction with Rac1, Ced-12 <newline> myoblast fusion ; GO:0007520 | traceable author statement <newline> imaginal disc fusion, thorax closure ; GO:0046529 | infe…	extrinsic component of plasma membrane ; GO:0019897 | inferred from direct assay <newline> cytoplasm ; GO:0005737 | inferred from direct assay <newline> ruffle ; GO:0001726 | traceable author statement	protein binding ; GO:0005515 | inferred from physical interaction with rols <newline> Rac guanyl-nucleotide exchange factor activity ; GO:0030676 | inferred from genetic interaction with Rac1
FBgn0004449	Ten-m	0	1	0	0	0	0	1	FastLMM_FastEpistasis	FBgn0004449	Ten-m		postsynaptic membrane organization ; GO:0001941 | inferred from mutant phenotype <newline> cytoplasmic microtubule organization ; GO:0031122 | inferred from mutant phenotype <newline> regulation of homotypic cell-cell adhesion ; GO:0034110 | inferred from mutant phenotype <newline> compound eye photoreceptor development ; GO:0042051 | inferred from mutant phenotype <newline> compound eye morphoge…	neuronal cell body ; GO:0043025 | inferred from direct assay <newline> neuromuscular junction ; GO:0031594 | inferred from direct assay <newline> extracellular matrix ; GO:0031012 | inferred from sequence or structural similarity <newline> plasma membrane ; GO:0005886 | inferred from high throughput direct assay <newline> postsynaptic membrane ; GO:0045211 | inferred from direct assay <newline> i…	identical protein binding ; GO:0042802 | inferred from direct assay <newline> protein binding ; GO:0005515 | inferred from physical interaction with UniProtKB:Q9VYN8 <newline> filamin binding ; GO:0031005 | inferred from direct assay <newline> protein homodimerization activity ; GO:0042803 | inferred from direct assay <newline> protein binding ; GO:0005515 | inferred from physical interaction wit…
FBgn0010113	hdc	0	0	0	0	1	0	0	FastEpistasis	FBgn0010113	hdc		instar larval or pupal development ; GO:0002165 | inferred from mutant phenotype <newline> regulation of neuron remodeling ; GO:1904799 | inferred from mutant phenotype <newline> negative regulation of neurogenesis ; GO:0050768 | inferred from mutant phenotype <newline> salivary gland cell autophagic cell death ; GO:0035071 | inferred from mutant phenotype <newline> axon extension ; GO:0048675 | …	dendrite ; GO:0030425 | inferred from direct assay <newline> axon ; GO:0030424 | inferred from direct assay <newline> perinuclear region of cytoplasm ; GO:0048471 | inferred from direct assay <newline> cytoplasm ; GO:0005737 | inferred from direct assay	-
FBgn0267791	HnRNP-K	1	0	0	0	0	0	0	FastEpistasis	FBgn0267791	HnRNP-K		regulation of transcription by RNA polymerase II ; GO:0006357 | inferred from electronic annotation with InterPro:IPR033090 <newline> RNA processing ; GO:0006396 | inferred from electronic annotation with InterPro:IPR033090 <newline> regulation of alternative mRNA splicing, via spliceosome ; GO:0000381 | inferred from high throughput mutant phenotype	omega speckle ; GO:0035062 | inferred from direct assay <newline> nucleus ; GO:0005634 | traceable author statement <newline> cytoplasm ; GO:0005737 | traceable author statement <newline> nucleus ; GO:0005634 | inferred from high throughput direct assay <newline> ribonucleoprotein complex ; GO:1990904 | inferred from sequence or structural similarity <newline> nucleus ; GO:0005634 | inferred by c…	DNA binding ; GO:0003677 | inferred from electronic annotation with InterPro:IPR033090 <newline> RNA binding ; GO:0003723 | inferred from electronic annotation with InterPro:IPR004088 <newline> mRNA binding ; GO:0003729 | traceable author statement <newline> transcription factor binding ; GO:0008134 | traceable author statement
FBgn0265523	Smr	0	0	0	0	0	0	1	FastEpistasis	FBgn0265523	Smr		negative regulation of transcription by RNA polymerase II ; GO:0000122 | inferred from biological aspect of ancestor with PANTHER:PTN001400465 <newline> ovarian follicle cell development ; GO:0030707 | inferred from mutant phenotype <newline> negative regulation of transcription by RNA polymerase II ; GO:0000122 | inferred from mutant phenotype <newline> regulation of mitotic cell cycle ; GO:0007…	nucleoplasm ; GO:0005654 | inferred from high throughput direct assay <newline> transcriptional repressor complex ; GO:0017053 | inferred from physical interaction with ebi <newline> nuclear chromatin ; GO:0000790 | inferred from biological aspect of ancestor with PANTHER:PTN001400465 <newline> transcriptional repressor complex ; GO:0017053 | inferred from biological aspect of ancestor with PANTH…	RNA polymerase II regulatory region DNA binding ; GO:0001012 | inferred from biological aspect of ancestor with PANTHER:PTN001400465 <newline> chromatin binding ; GO:0003682 | inferred from direct assay <newline> histone deacetylase binding ; GO:0042826 | inferred from biological aspect of ancestor with PANTHER:PTN001400465 <newline> protein binding ; GO:0005515 | inferred from physical interacti…
FBgn0263930	dally	0	1	0	0	0	0	0	FastLMM	FBgn0263930	dally		imaginal disc-derived wing vein morphogenesis ; GO:0008586 | inferred from mutant phenotype <newline> positive regulation of canonical Wnt signaling pathway ; GO:0090263 | inferred from genetic interaction with Notum <newline> positive regulation of smoothened signaling pathway ; GO:0045880 | inferred from genetic interaction with dlp <newline> chaeta development ; GO:0022416 | inferred from muta…	collagen-containing extracellular matrix ; GO:0062023 | inferred from electronic annotation with InterPro:IPR001863 <newline> basolateral plasma membrane ; GO:0016323 | inferred from direct assay <newline> cell surface ; GO:0009986 | inferred from biological aspect of ancestor with PANTHER:PTN002247069 <newline> extracellular region ; GO:0005576 | inferred from biological aspect of ancestor with …	protein binding ; GO:0005515 | inferred from physical interaction with dpp
FBgn0011260	Sema2a	0	0	0	0	0	0	1	FastLMM	FBgn0011260	Sema2a		adult behavior ; GO:0030534 | inferred from mutant phenotype <newline> neural crest cell migration ; GO:0001755 | inferred from biological aspect of ancestor with PANTHER:PTN000867340 <newline> synaptic target inhibition ; GO:0016201 | inferred from mutant phenotype <newline> flight behavior ; GO:0007629 | inferred from mutant phenotype <newline> sensory neuron axon guidance ; GO:0097374 | inferr…	cytosol ; GO:0005829 | inferred from high throughput direct assay <newline> endomembrane system ; GO:0012505 | inferred from high throughput direct assay <newline> extracellular region ; GO:0005576 | inferred from sequence or structural similarity <newline> extracellular space ; GO:0005615 | inferred from biological aspect of ancestor with PANTHER:PTN000744245	protein binding ; GO:0005515 | inferred from physical interaction with UniProtKB:Q9V4A7 <newline> semaphorin receptor binding ; GO:0030215 | inferred from biological aspect of ancestor with PANTHER:PTN000867340 <newline> chemorepellent activity ; GO:0045499 | inferred from biological aspect of ancestor with PANTHER:PTN000867340
FBgn0265974	ttv	0	0	0	0	0	0	1	FastEpistasis	FBgn0265974	ttv		protein glycosylation ; GO:0006486 | inferred from electronic annotation with InterPro:IPR004263 <newline> heparan sulfate proteoglycan biosynthetic process ; GO:0015012 | inferred from mutant phenotype <newline> positive regulation of canonical Wnt signaling pathway ; GO:0090263 | inferred from genetic interaction with UniProtKB:Q9Y169 <newline> heparan sulfate proteoglycan biosynthetic process,…	integral component of membrane ; GO:0016021 | inferred from electronic annotation with InterPro:IPR015338 <newline> endoplasmic reticulum ; GO:0005783 | inferred from direct assay <newline> Golgi apparatus ; GO:0005794 | inferred from direct assay <newline> Golgi apparatus ; GO:0005794 | inferred from biological aspect of ancestor with PANTHER:PTN000115158 <newline> integral component of membrane…	glucuronosyltransferase activity ; GO:0015020 | inferred from biological aspect of ancestor with PANTHER:PTN000869020 <newline> protein binding ; GO:0005515 | inferred from physical interaction with UniProtKB:Q9Y169 <newline> N-acetylglucosaminyl-proteoglycan 4-beta-glucuronosyltransferase activity ; GO:0050509 | inferred from direct assay <newline> N-acetylglucosaminyl-proteoglycan 4-beta-glucur…
FBgn0001078	ftz-f1	0	1	0	0	0	0	0	FastLMM	FBgn0001078	ftz-f1		regulation of transcription, DNA-templated ; GO:0006355 | inferred from mutant phenotype <newline> hormone-mediated signaling pathway ; GO:0009755 | inferred from biological aspect of ancestor with PANTHER:PTN000639680 <newline> regulation of development, heterochronic ; GO:0040034 | traceable author statement <newline> metamorphosis ; GO:0007552 | traceable author statement <newline> instar larv…	RNA polymerase II transcription factor complex ; GO:0090575 | inferred from biological aspect of ancestor with PANTHER:PTN000639680 <newline> cytoplasm ; GO:0005737 | non-traceable author statement <newline> nucleus ; GO:0005634 | inferred from direct assay	steroid hormone receptor activity ; GO:0003707 | inferred from electronic annotation with InterPro:IPR001723 <newline> zinc ion binding ; GO:0008270 | inferred from electronic annotation with InterPro:IPR001628, InterPro:IPR013088 <newline> nuclear receptor activity ; GO:0004879 | inferred from biological aspect of ancestor with PANTHER:PTN000639680 <newline> DNA-binding transcription activator a…
FBgn0034366	Atg7	0	0	0	1	0	0	0	FastEpistasis	FBgn0034366	Atg7		regulation of autophagy ; GO:0010506 | inferred from mutant phenotype <newline> oogenesis ; GO:0048477 | inferred from mutant phenotype <newline> larval midgut cell programmed cell death ; GO:0035096 | NOT inferred from mutant phenotype <newline> C-terminal protein lipidation ; GO:0006501 | inferred from biological aspect of ancestor with PANTHER:PTN000102341 <newline> autophagy ; GO:0006914 | in…	phagophore assembly site ; GO:0000407 | inferred from biological aspect of ancestor with PANTHER:PTN000102341 <newline> phagophore assembly site ; GO:0000407 | inferred from sequence or structural similarity with SGD:S000001214 <newline> cytoplasm ; GO:0005737 | inferred from biological aspect of ancestor with PANTHER:PTN000102040	Atg8 activating enzyme activity ; GO:0019779 | inferred from sequence or structural similarity with SGD:S000001214 <newline> Atg12 activating enzyme activity ; GO:0019778 | inferred from sequence or structural similarity with SGD:S000001214 <newline> Atg8 activating enzyme activity ; GO:0019779 | inferred from biological aspect of ancestor with PANTHER:PTN000102341 <newline> Atg12 activating enzy…
FBgn0036411	Sox21a	0	0	0	1	0	0	0	FastLMM	FBgn0036411	Sox21a		regulation of transcription, DNA-templated ; GO:0006355 | inferred from biological aspect of ancestor with PANTHER:PTN000030384 <newline> anatomical structure morphogenesis ; GO:0009653 | inferred from biological aspect of ancestor with PANTHER:PTN000030384 <newline> stem cell proliferation ; GO:0072089 | inferred from mutant phenotype <newline> cell differentiation ; GO:0030154 | inferred from b…	nucleus ; GO:0005634 | inferred from direct assay <newline> nucleus ; GO:0005634 | inferred from biological aspect of ancestor with PANTHER:PTN000030384 <newline> nuclear transcription factor complex ; GO:0044798 | inferred from biological aspect of ancestor with PANTHER:PTN000030384	DNA-binding transcription factor activity, RNA polymerase II-specific ; GO:0000981 | inferred from biological aspect of ancestor with PANTHER:PTN000030384
FBgn0040068	Vav	0	0	0	0	1	0	0	FastLMM	FBgn0040068	Vav		regulation of Rho protein signal transduction ; GO:0035023 | inferred from electronic annotation with InterPro:IPR000219 <newline> positive regulation of actin cytoskeleton reorganization ; GO:2000251 | inferred from mutant phenotype <newline> melanotic encapsulation of foreign target ; GO:0035011 | inferred from mutant phenotype <newline> photoreceptor cell axon guidance ; GO:0072499 | inferred …	cytosol ; GO:0005829 | inferred from direct assay	Rac guanyl-nucleotide exchange factor activity ; GO:0030676 | inferred from direct assay <newline> Ras guanyl-nucleotide exchange factor activity ; GO:0005088 | inferred from genetic interaction with Rac1 <newline> Ras guanyl-nucleotide exchange factor activity ; GO:0005088 | inferred from direct assay
FBgn0004924	Top1	0	1	0	0	0	1	0	FastLMM	FBgn0004924	Top1		chromosome segregation ; GO:0007059 | inferred from biological aspect of ancestor with PANTHER:PTN000033230 <newline> DNA replication ; GO:0006260 | inferred from biological aspect of ancestor with PANTHER:PTN000033230 <newline> DNA topological change ; GO:0006265 | inferred from biological aspect of ancestor with PANTHER:PTN000033230 <newline> oogenesis ; GO:0048477 | inferred from mutant phenot…	nucleus ; GO:0005634 | inferred from direct assay <newline> replication fork protection complex ; GO:0031298 | inferred from biological aspect of ancestor with PANTHER:PTN000033230 <newline> nucleolus ; GO:0005730 | inferred from direct assay <newline> polytene chromosome puff ; GO:0005703 | inferred from direct assay <newline> nuclear euchromatin ; GO:0005719 | inferred from direct assay <newlin…	DNA binding ; GO:0003677 | inferred from electronic annotation with InterPro:IPR001631, InterPro:IPR008336, InterPro:IPR011010, InterPro:IPR013030, InterPro:IPR013499, InterPro:IPR013500, InterPro:IPR014711, InterPro:IPR014727, InterPro:IPR018521 <newline> DNA topoisomerase type I (single strand cut, ATP-independent) activity ; GO:0003917 | inferred from direct assay <newline> DNA topoisomerase a…
FBgn0283521	lola	0	0	1	0	0	0	0	FastEpistasis	FBgn0283521	lola		larval lymph gland hemopoiesis ; GO:0035167 | inferred from mutant phenotype <newline> gonad development ; GO:0008406 | inferred from mutant phenotype <newline> regulation of imaginal disc-derived wing size ; GO:0044719 | inferred from mutant phenotype <newline> axon guidance ; GO:0007411 | inferred from mutant phenotype <newline> positive regulation of biosynthetic process of antibacterial pepti…	nucleoplasm ; GO:0005654 | inferred from high throughput direct assay <newline> nucleus ; GO:0005634 | inferred from direct assay <newline> nucleus ; GO:0005634 | inferred from biological aspect of ancestor with PANTHER:PTN001135010 <newline> cytoplasm ; GO:0005737 | inferred from direct assay	protein binding ; GO:0005515 | inferred from physical interaction with JIL-1 <newline> DNA-binding transcription factor activity ; GO:0003700 | inferred from sequence or structural similarity with ttk <newline> DNA binding ; GO:0003677 | inferred from direct assay
FBgn0051774	fred	0	0	1	0	0	0	1	FastLMM_FastEpistasis	FBgn0051774	fred		ommatidial rotation ; GO:0016318 | inferred from mutant phenotype inferred from genetic interaction with pnt inferred from genetic interaction with Vang inferred from genetic interaction with stan inferred from genetic interaction with cno <newline> sensory organ development ; GO:0007423 | inferred from mutant phenotype <newline> compound eye morphogenesis ; GO:0001745 | inferred from mutant phen…	cellular_component ; GO:0005575 | no biological data available	molecular_function ; GO:0003674 | no biological data available
FBgn0004244	Rdl	0	0	1	0	1	0	0	FastLMM	FBgn0004244	Rdl		nervous system process ; GO:0050877 | inferred from biological aspect of ancestor with PANTHER:PTN000434994 <newline> inter-male aggressive behavior ; GO:0002121 | inferred from mutant phenotype <newline> ion transmembrane transport ; GO:0034220 | inferred from biological aspect of ancestor with PANTHER:PTN000434994 <newline> signal transduction ; GO:0007165 | inferred from biological aspect of a…	neuron projection membrane ; GO:0032589 | inferred from direct assay <newline> dendrite ; GO:0030425 | inferred from direct assay <newline> axon ; GO:0030424 | inferred from direct assay <newline> integral component of membrane ; GO:0016021 | non-traceable author statement <newline> integral component of plasma membrane ; GO:0005887 | inferred from biological aspect of ancestor with PANTHER:PTN00…	GABA-A receptor activity ; GO:0004890 | inferred from electronic annotation with InterPro:IPR002289 <newline> neurotransmitter receptor activity ; GO:0030594 | inferred from direct assay <newline> GABA-gated chloride ion channel activity ; GO:0022851 | inferred from direct assay <newline> GABA-A receptor activity ; GO:0004890 | traceable author statement
FBgn0267001	Ten-a	0	0	1	0	0	0	0	FastEpistasis	FBgn0267001	Ten-a		positive regulation of locomotion ; GO:0040017 | inferred from mutant phenotype <newline> neuromuscular synaptic transmission ; GO:0007274 | inferred from mutant phenotype <newline> postsynaptic membrane organization ; GO:0001941 | inferred from mutant phenotype <newline> central complex development ; GO:0048036 | inferred from mutant phenotype <newline> motor neuron axon guidance ; GO:0008045 | …	cytoskeleton of presynaptic active zone ; GO:0048788 | inferred from mutant phenotype <newline> extracellular region ; GO:0005576 | inferred from sequence model <newline> presynaptic active zone ; GO:0048786 | inferred from direct assay <newline> neuronal cell body ; GO:0043025 | inferred from direct assay <newline> neuromuscular junction ; GO:0031594 | inferred from direct assay <newline> extrac…	catalytic activity ; GO:0003824 | inferred from electronic annotation with InterPro:IPR011041 <newline> protein binding ; GO:0005515 | inferred from physical interaction with UniProtKB:O61307 <newline> protein homodimerization activity ; GO:0042803 | inferred from direct assay <newline> protein heterodimerization activity ; GO:0046982 | inferred from direct assay
FBgn0028369	kirre	0	1	0	0	0	0	1	FastLMM_FastEpistasis	FBgn0028369	kirre		homophilic cell adhesion via plasma membrane adhesion molecules ; GO:0007156 | inferred from genetic interaction with sns <newline> nephrocyte filtration ; GO:0097206 | inferred from mutant phenotype <newline> nephrocyte diaphragm assembly ; GO:0036059 | inferred from mutant phenotype <newline> regulation of striated muscle tissue development ; GO:0016202 | inferred from mutant phenotype inferred…	apical plasma membrane ; GO:0016324 | inferred from direct assay <newline> nephrocyte diaphragm ; GO:0005917 | inferred from direct assay <newline> integral component of plasma membrane ; GO:0005887 | inferred from direct assay <newline> cell-cell junction ; GO:0005911 | colocalizes_with inferred from direct assay <newline> plasma membrane ; GO:0005886 | inferred from direct assay	protein binding ; GO:0005515 | inferred from physical interaction with rols <newline> cell adhesion molecule binding ; GO:0050839 | inferred from physical interaction with pyd
FBgn0003380	Sh	0	0	1	0	0	0	1	FastEpistasis	FBgn0003380	Sh		protein homooligomerization ; GO:0051260 | inferred from electronic annotation with InterPro:IPR003131 <newline> regulation of synaptic activity ; GO:0060025 | inferred from mutant phenotype <newline> larval locomotory behavior ; GO:0008345 | inferred from mutant phenotype <newline> potassium ion transmembrane transport ; GO:0071805 | inferred from biological aspect of ancestor with PANTHER:PTN00…	voltage-gated potassium channel complex ; GO:0008076 | inferred from biological aspect of ancestor with PANTHER:PTN001355853 <newline> voltage-gated potassium channel complex ; GO:0008076 | traceable author statement <newline> integral component of membrane ; GO:0016021 | inferred from biological aspect of ancestor with PANTHER:PTN000164970 <newline> integral component of membrane ; GO:0016021 | …	voltage-gated potassium channel activity ; GO:0005249 | traceable author statement <newline> voltage-gated cation channel activity ; GO:0022843 | inferred from direct assay <newline> delayed rectifier potassium channel activity ; GO:0005251 | inferred from biological aspect of ancestor with PANTHER:PTN000898862 <newline> voltage-gated potassium channel activity ; GO:0005249 | non-traceable author…
FBgn0003386	Shaw	0	0	0	0	0	1	0	FastEpistasis	FBgn0003386	Shaw		protein homooligomerization ; GO:0051260 | inferred from electronic annotation with InterPro:IPR003131 <newline> potassium ion transport ; GO:0006813 | traceable author statement <newline> potassium ion transport ; GO:0006813 | inferred from sequence or structural similarity with eag <newline> sleep ; GO:0030431 | inferred from mutant phenotype <newline> potassium ion transmembrane transport ; GO…	voltage-gated potassium channel complex ; GO:0008076 | inferred from sequence or structural similarity with eag <newline> voltage-gated potassium channel complex ; GO:0008076 | inferred from biological aspect of ancestor with PANTHER:PTN001355853 <newline> dendrite membrane ; GO:0032590 | inferred from biological aspect of ancestor with PANTHER:PTN000165490 <newline> neuronal cell body membrane ;…	voltage-gated potassium channel activity ; GO:0005249 | inferred from biological aspect of ancestor with PANTHER:PTN000164970 <newline> voltage-gated potassium channel activity ; GO:0005249 | traceable author statement <newline> delayed rectifier potassium channel activity ; GO:0005251 | inferred from biological aspect of ancestor with PANTHER:PTN000898955 <newline> voltage-gated cation channel a…
FBgn0010265	RpS13	0	0	1	0	0	0	0	FastLMM	FBgn0010265	RpS13		translation ; GO:0006412 | inferred from electronic annotation with InterPro:IPR000589, InterPro:IPR012606 <newline> cytoplasmic translation ; GO:0002181 | inferred by curator from GO:0022626 <newline> cytoplasmic translation ; GO:0002181 | traceable author statement	cytosolic ribosome ; GO:0022626 | inferred from high throughput direct assay <newline> cytoplasm ; GO:0005737 | inferred from direct assay <newline> nucleolus ; GO:0005730 | inferred from biological aspect of ancestor with PANTHER:PTN000223268 <newline> cytosolic small ribosomal subunit ; GO:0022627 | inferred from biological aspect of ancestor with PANTHER:PTN000223267 <newline> nuclear chromoso…	structural constituent of ribosome ; GO:0003735 | inferred from biological aspect of ancestor with PANTHER:PTN000223267 <newline> structural constituent of ribosome ; GO:0003735 | inferred from high throughput direct assay <newline> structural constituent of ribosome ; GO:0003735 | traceable author statement <newline> small ribosomal subunit rRNA binding ; GO:0070181 | inferred from biological as…
FBgn0024732	Drep1	0	0	0	0	0	0	1	FastLMM	FBgn0024732	Drep1		apoptotic DNA fragmentation ; GO:0006309 | inferred from electronic annotation with InterPro:IPR017299 <newline> regulation of apoptotic process ; GO:0042981 | inferred from biological aspect of ancestor with PANTHER:PTN000959605 <newline> negative regulation of apoptotic process ; GO:0043066 | inferred from genetic interaction with MGI:MGI:1270845 <newline> nurse cell apoptotic process ; GO:0045…	intracellular ; GO:0005622 | inferred from electronic annotation with InterPro:IPR003508	deoxyribonuclease inhibitor activity ; GO:0060703 | inferred from electronic annotation with InterPro:IPR017299
FBgn0029830	Grip	0	0	0	0	1	0	0	FastEpistasis	FBgn0029830	Grip		receptor clustering ; GO:0043113 | inferred from biological aspect of ancestor with PANTHER:PTN001501163 <newline> cell-cell adhesion ; GO:0098609 | inferred from biological aspect of ancestor with PANTHER:PTN001501163 <newline> synapse organization ; GO:0050808 | inferred from mutant phenotype <newline> chemical synaptic transmission ; GO:0007268 | inferred from biological aspect of ancestor wit…	neuromuscular junction ; GO:0031594 | inferred from direct assay <newline> Golgi-associated vesicle ; GO:0005798 | inferred from direct assay <newline> neuron projection ; GO:0043005 | inferred from biological aspect of ancestor with PANTHER:PTN000563569 <newline> terminal bouton ; GO:0043195 | inferred from direct assay <newline> basolateral plasma membrane ; GO:0016323 | inferred from biologica…	signaling receptor binding ; GO:0005102 | inferred from physical interaction with fz2 <newline> protein binding ; GO:0005515 | inferred from physical interaction with ed <newline> protein binding ; GO:0005515 | inferred from physical interaction with kon
FBgn0036257	RhoGAP68F	0	0	0	0	0	0	1	FastEpistasis	FBgn0036257	RhoGAP68F		ventral furrow formation ; GO:0007370 | inferred from mutant phenotype <newline> positive regulation of synaptic growth at neuromuscular junction ; GO:0045887 | inferred from direct assay <newline> Rho protein signal transduction ; GO:0007266 | inferred from direct assay <newline> negative regulation of stress fiber assembly ; GO:0051497 | inferred from direct assay <newline> negative regulation …	recycling endosome ; GO:0055037 | inferred from direct assay <newline> early endosome ; GO:0005769 | inferred from direct assay	GTPase activator activity ; GO:0005096 | inferred from direct assay <newline> Rab GTPase binding ; GO:0017137 | inferred from physical interaction with Rab4
FBgn0085424	nub	0	0	0	1	0	0	0	FastLMM	FBgn0085424	nub		regulation of neurogenesis ; GO:0050767 | inferred from mutant phenotype <newline> cell differentiation ; GO:0030154 | inferred from biological aspect of ancestor with PANTHER:PTN000180816 <newline> regulation of transcription by RNA polymerase II ; GO:0006357 | inferred from mutant phenotype <newline> dendrite morphogenesis ; GO:0048813 | inferred from mutant phenotype <newline> negative regulat…	nucleus ; GO:0005634 | inferred from biological aspect of ancestor with PANTHER:PTN000180816	DNA-binding transcription activator activity, RNA polymerase II-specific ; GO:0001228 | inferred from direct assay <newline> DNA-binding transcription activator activity, RNA polymerase II-specific ; GO:0001228 | inferred from biological aspect of ancestor with PANTHER:PTN000180816 <newline> transcription regulatory region sequence-specific DNA binding ; GO:0000976 | inferred from direct assay
FBgn0038922	Idh3b	0	0	1	0	0	0	0	FastLMM	FBgn0038922	Idh3b		tricarboxylic acid cycle ; GO:0006099 | inferred from biological aspect of ancestor with PANTHER:PTN000216787 <newline> ecdysone-mediated induction of salivary gland cell autophagic cell death ; GO:0035072 | inferred from mutant phenotype <newline> salivary gland cell autophagic cell death ; GO:0035071 | inferred from mutant phenotype <newline> tricarboxylic acid cycle ; GO:0006099 | inferred fro…	mitochondrial matrix ; GO:0005759 | inferred from direct assay <newline> mitochondrion ; GO:0005739 | inferred from biological aspect of ancestor with PANTHER:PTN000216786	isocitrate dehydrogenase (NAD+) activity ; GO:0004449 | traceable author statement <newline> isocitrate dehydrogenase (NAD+) activity ; GO:0004449 | inferred from biological aspect of ancestor with PANTHER:PTN000216787
FBgn0261673	nemy	0	0	1	0	0	0	0	FastEpistasis	FBgn0261673	nemy		regulation of synaptic plasticity ; GO:0048167 | inferred from mutant phenotype <newline> memory ; GO:0007613 | inferred from mutant phenotype <newline> locomotory behavior ; GO:0007626 | inferred from mutant phenotype <newline> regulation of neurotransmitter secretion ; GO:0046928 | inferred from mutant phenotype	-	oxidoreductase activity ; GO:0016491 | inferred from biological aspect of ancestor with PANTHER:PTN000010357 <newline> ferric-chelate reductase activity ; GO:0000293 | inferred from sequence or structural similarity with UniProtKB:Q53TN4
FBgn0029881	pigs	1	0	1	0	0	0	0	FastLMM_FastEpistasis	FBgn0029881	pigs		ovarian follicle cell stalk formation ; GO:0030713 | inferred from mutant phenotype <newline> ovarian follicle cell development ; GO:0030707 | inferred from mutant phenotype	actin cytoskeleton ; GO:0015629 | colocalizes_with inferred from direct assay <newline> cytoplasmic microtubule ; GO:0005881 | colocalizes_with inferred from direct assay	microtubule binding ; GO:0008017 | inferred from electronic annotation with InterPro:IPR003108
FBgn0033194	Vps13	0	0	0	1	0	0	0	FastEpistasis	FBgn0033194	Vps13		protein retention in Golgi apparatus ; GO:0045053 | inferred from biological aspect of ancestor with PANTHER:PTN000414878 <newline> protein metabolic process ; GO:0019538 | inferred from mutant phenotype <newline> protein targeting to vacuole ; GO:0006623 | inferred from biological aspect of ancestor with PANTHER:PTN000414878 <newline> protein targeting to vacuole ; GO:0006623 | inferred from seq…	late endosome membrane ; GO:0031902 | inferred from direct assay <newline> extrinsic component of membrane ; GO:0019898 | inferred from biological aspect of ancestor with PANTHER:PTN000414878	-
FBgn0003129	Poxm	0	1	0	0	0	1	0	FastLMM_FastEpistasis	FBgn0003129	Poxm		regulation of transcription, DNA-templated ; GO:0006355 | inferred from electronic annotation with InterPro:IPR001523 <newline> larval somatic muscle development ; GO:0007526 | inferred from mutant phenotype <newline> dendrite morphogenesis ; GO:0048813 | inferred from mutant phenotype	nucleus ; GO:0005634 | inferred from direct assay	DNA binding ; GO:0003677 | inferred from electronic annotation with InterPro:IPR001523, InterPro:IPR009057
FBgn0028622	qsm	0	0	0	0	0	0	1	FastEpistasis	FBgn0028622	qsm		locomotor rhythm ; GO:0045475 | inferred from mutant phenotype <newline> cell morphogenesis ; GO:0000902 | inferred from sequence or structural similarity with dyl	-	-
FBgn0285911	Vps16A	0	0	0	1	0	0	0	FastLMM	FBgn0285911	Vps16A		intracellular protein transport ; GO:0006886 | inferred from electronic annotation with InterPro:IPR006925, InterPro:IPR006926, InterPro:IPR016534 <newline> autophagosome maturation ; GO:0097352 | inferred from mutant phenotype <newline> regulation of SNARE complex assembly ; GO:0035542 | inferred from biological aspect of ancestor with PANTHER:PTN000301724 <newline> endosomal transport ; GO:0016…	HOPS complex ; GO:0030897 | inferred from biological aspect of ancestor with PANTHER:PTN000301724 <newline> endosome ; GO:0005768 | inferred from direct assay <newline> autophagosome ; GO:0005776 | inferred from direct assay <newline> HOPS complex ; GO:0030897 | inferred from direct assay <newline> lysosome ; GO:0005764 | inferred from direct assay <newline> cytosol ; GO:0005829 | inferred from d…	protein binding ; GO:0005515 | inferred from physical interaction with UniProtKB:A4V4S5,UniProtKB:M9PF72,UniProtKB:Q24314,UniProtKB:Q9VRX2 <newline> actin binding ; GO:0003779 | inferred from biological aspect of ancestor with PANTHER:PTN000301724 <newline> syntaxin binding ; GO:0019905 | contributes_to inferred from physical interaction with Syx17
FBgn0014135	bnl	0	1	0	1	0	0	0	FastEpistasis	FBgn0014135	bnl		fibroblast growth factor receptor signaling pathway ; GO:0008543 | inferred from mutant phenotype <newline> fibroblast growth factor receptor signaling pathway ; GO:0008543 | inferred from genetic interaction with stumps <newline> fibroblast growth factor receptor signaling pathway ; GO:0008543 | inferred from genetic interaction with btl <newline> cytoneme assembly ; GO:0035231 | inferred from d…	extracellular space ; GO:0005615 | inferred from sequence or structural similarity with UniProtKB:P05230 <newline> cytoneme ; GO:0035230 | colocalizes_with inferred from direct assay <newline> extracellular region ; GO:0005576 | inferred from direct assay	growth factor activity ; GO:0008083 | inferred from electronic annotation with InterPro:IPR002209 <newline> morphogen activity ; GO:0016015 | inferred from direct assay <newline> fibroblast growth factor receptor binding ; GO:0005104 | inferred from mutant phenotype <newline> chemoattractant activity ; GO:0042056 | inferred from genetic interaction with btl <newline> chemoattractant activity ; GO…
FBgn0041096	rols	0	0	1	0	0	0	0	FastEpistasis	FBgn0041096	rols		myoblast fusion ; GO:0007520 | inferred from mutant phenotype <newline> border follicle cell migration ; GO:0007298 | inferred from mutant phenotype <newline> sarcomere organization ; GO:0045214 | inferred from direct assay inferred from mutant phenotype <newline> myoblast fusion ; GO:0007520 | traceable author statement <newline> anterior Malpighian tubule development ; GO:0061327 | inferred fro…	cytoplasm ; GO:0005737 | inferred from direct assay <newline> Z disc ; GO:0030018 | inferred from direct assay <newline> apical plasma membrane ; GO:0016324 | inferred from direct assay <newline> cell-cell junction ; GO:0005911 | colocalizes_with inferred from direct assay	cell adhesion molecule binding ; GO:0050839 | inferred from physical interaction with kirre <newline> structural constituent of muscle ; GO:0008307 | inferred from mutant phenotype <newline> protein binding ; GO:0005515 | inferred from physical interaction with mbc inferred from physical interaction with kirre <newline> protein binding ; GO:0005515 | inferred from physical interaction with Actn i…
FBgn0043070	MESK2	1	0	0	0	0	0	1	FastLMM_FastEpistasis	FBgn0043070	MESK2		signal transduction ; GO:0007165 | inferred from biological aspect of ancestor with PANTHER:PTN000867215	cytoplasm ; GO:0005737 | inferred from biological aspect of ancestor with PANTHER:PTN000867215	-
FBgn0015622	Cnx99A	0	0	1	0	0	0	0	FastEpistasis	FBgn0015622	Cnx99A		protein folding ; GO:0006457 | inferred from biological aspect of ancestor with PANTHER:PTN000117401 <newline> protein stabilization ; GO:0050821 | inferred from mutant phenotype <newline> regulation of calcium ion transport into cytosol ; GO:0010522 | inferred from mutant phenotype <newline> endoplasmic reticulum unfolded protein response ; GO:0030968 | inferred from biological aspect of ancesto…	endoplasmic reticulum membrane ; GO:0005789 | inferred from biological aspect of ancestor with PANTHER:PTN000117401 <newline> endomembrane system ; GO:0012505 | inferred from high throughput direct assay <newline> plasma membrane ; GO:0005886 | inferred from sequence or structural similarity <newline> perinuclear endoplasmic reticulum ; GO:0097038 | inferred from direct assay	unfolded protein binding ; GO:0051082 | inferred from electronic annotation with InterPro:IPR001580 <newline> calcium ion binding ; GO:0005509 | inferred from biological aspect of ancestor with PANTHER:PTN000117401
FBgn0000536	eas	0	0	0	0	1	0	0	FastLMM	FBgn0000536	eas		associative learning ; GO:0008306 | traceable author statement <newline> mechanosensory behavior ; GO:0007638 | inferred from mutant phenotype <newline> habituation ; GO:0046959 | traceable author statement <newline> mushroom body development ; GO:0016319 | traceable author statement <newline> asymmetric neuroblast division ; GO:0055059 | inferred from mutant phenotype <newline> long-term memory …	cytoplasm ; GO:0005737 | inferred from sequence or structural similarity with SGD:S000004123	ethanolamine kinase activity ; GO:0004305 | inferred from direct assay <newline> choline kinase activity ; GO:0004103 | traceable author statement
FBgn0085387	shakB	1	0	0	0	0	1	0	FastLMM_FastEpistasis	FBgn0085387	shakB		transmembrane transport ; GO:0055085 | inferred from mutant phenotype <newline> intercellular transport ; GO:0010496 | inferred from sequence or structural similarity with Inx3 <newline> jump response ; GO:0007630 | inferred from mutant phenotype <newline> gap junction assembly ; GO:0016264 | inferred from mutant phenotype <newline> phototransduction ; GO:0007602 | inferred from mutant phenotype …	plasma membrane ; GO:0005886 | inferred from direct assay <newline> gap junction ; GO:0005921 | inferred from mutant phenotype <newline> plasma membrane ; GO:0005886 | inferred from biological aspect of ancestor with PANTHER:PTN000223951 <newline> gap junction ; GO:0005921 | inferred from biological aspect of ancestor with PANTHER:PTN000223951 <newline> gap junction ; GO:0005921 | inferred from d…	photoreceptor activity ; GO:0009881 | inferred from mutant phenotype <newline> gap junction channel activity ; GO:0005243 | inferred from mutant phenotype <newline> gap junction channel activity ; GO:0005243 | inferred from biological aspect of ancestor with PANTHER:PTN000223951
FBgn0032130	brwl	0	1	0	0	0	0	0	FastLMM	FBgn0032130	brwl		regulation of transcription by RNA polymerase II ; GO:0006357 | inferred from biological aspect of ancestor with PANTHER:PTN000956409	transcription factor complex ; GO:0005667 | inferred from biological aspect of ancestor with PANTHER:PTN000956409 <newline> nucleus ; GO:0005634 | inferred from biological aspect of ancestor with PANTHER:PTN000956409	DNA binding ; GO:0003677 | inferred from electronic annotation with InterPro:IPR004210
FBgn0083975	Nlg4	0	0	0	0	1	0	0	FastLMM	FBgn0083975	Nlg4		chemical synaptic transmission ; GO:0007268 | inferred from biological aspect of ancestor with PANTHER:PTN000168538 <newline> synaptic vesicle endocytosis ; GO:0048488 | inferred from biological aspect of ancestor with PANTHER:PTN000168538 <newline> sleep ; GO:0030431 | inferred from mutant phenotype <newline> synaptic transmission, GABAergic ; GO:0051932 | inferred from direct assay <newline> ne…	integral component of plasma membrane ; GO:0005887 | inferred from biological aspect of ancestor with PANTHER:PTN000168538 <newline> cell surface ; GO:0009986 | inferred from biological aspect of ancestor with PANTHER:PTN000168538 <newline> synapse ; GO:0045202 | inferred from biological aspect of ancestor with PANTHER:PTN000168538	signaling receptor activity ; GO:0038023 | inferred from biological aspect of ancestor with PANTHER:PTN000168538 <newline> neurexin family protein binding ; GO:0042043 | inferred from biological aspect of ancestor with PANTHER:PTN000168538
FBgn0028509	CenG1A	0	0	0	1	0	0	0	FastEpistasis	FBgn0028509	CenG1A		positive regulation of GTPase activity ; GO:0043547 | inferred from direct assay inferred from mutant phenotype <newline> medium-term memory ; GO:0072375 | inferred from mutant phenotype <newline> regulation of GTPase activity ; GO:0043087 | inferred from sequence model	nucleus ; GO:0005634 | inferred from biological aspect of ancestor with PANTHER:PTN000572108 <newline> membrane ; GO:0016020 | inferred from sequence or structural similarity with HGNC:16921	GTP binding ; GO:0005525 | inferred from electronic annotation with InterPro:IPR001806 <newline> GTPase activator activity ; GO:0005096 | inferred from mutant phenotype <newline> GTPase activity ; GO:0003924 | inferred from direct assay <newline> GTPase activator activity ; GO:0005096 | inferred from sequence model
FBgn0014009	Rab2	0	0	0	1	0	0	0	FastLMM	FBgn0014009	Rab2		vesicle-mediated transport ; GO:0016192 | inferred from sequence or structural similarity with Rab11 <newline> Rab protein signal transduction ; GO:0032482 | inferred from sequence or structural similarity with Rab11 <newline> protein secretion ; GO:0009306 | inferred from genetic interaction with Rab1 <newline> regulation of glutamate receptor clustering ; GO:0106104 | inferred from mutant pheno…	postsynapse of neuromuscular junction ; GO:0098975 | inferred from direct assay <newline> plasma membrane ; GO:0005886 | inferred from high throughput direct assay <newline> endoplasmic reticulum exit site ; GO:0070971 | inferred from direct assay <newline> Golgi apparatus ; GO:0005794 | inferred from direct assay <newline> neuronal cell body ; GO:0043025 | inferred from high throughput direct as…	GTP binding ; GO:0005525 | inferred from electronic annotation with InterPro:IPR001806, InterPro:IPR003579, InterPro:IPR005225 <newline> protein binding ; GO:0005515 | inferred from physical interaction with Gmap, Golgin245, GCC88, GCC185 <newline> protein binding ; GO:0005515 | inferred from physical interaction with BicD inferred from physical interaction with Golgin104 inferred from physical i…
FBgn0032151	nAChRalpha6	0	1	0	0	0	0	0	FastEpistasis	FBgn0032151	nAChRalpha6		synaptic transmission, cholinergic ; GO:0007271 | inferred from mutant phenotype <newline> regulation of membrane potential ; GO:0042391 | inferred from biological aspect of ancestor with PANTHER:PTN000434994 <newline> chemical synaptic transmission ; GO:0007268 | inferred from biological aspect of ancestor with PANTHER:PTN000434994 <newline> response to insecticide ; GO:0017085 | inferred from m…	postsynaptic membrane ; GO:0045211 | inferred from electronic annotation with InterPro:IPR002394 <newline> neuron projection ; GO:0043005 | inferred from biological aspect of ancestor with PANTHER:PTN000434994 <newline> acetylcholine-gated channel complex ; GO:0005892 | inferred from sequence or structural similarity <newline> integral component of plasma membrane ; GO:0005887 | inferred from bio…	transmembrane signaling receptor activity ; GO:0004888 | inferred from electronic annotation with InterPro:IPR006201 <newline> acetylcholine-gated cation-selective channel activity ; GO:0022848 | contributes_to inferred from direct assay <newline> acetylcholine-gated cation-selective channel activity ; GO:0022848 | inferred from sequence or structural similarity
FBgn0265416	Neto	0	0	0	0	1	0	0	FastEpistasis	FBgn0265416	Neto		glutamate receptor clustering ; GO:0097688 | inferred from mutant phenotype <newline> postsynaptic density organization ; GO:0097106 | inferred from mutant phenotype <newline> hatching behavior ; GO:0035187 | inferred from mutant phenotype <newline> neuromuscular junction development ; GO:0007528 | inferred from mutant phenotype <newline> neuromuscular synaptic transmission ; GO:0007274 | inferre…	ionotropic glutamate receptor complex ; GO:0008328 | inferred from direct assay <newline> neuromuscular junction ; GO:0031594 | inferred from direct assay <newline> muscle cell postsynaptic specialization ; GO:0097482 | inferred from direct assay	molecular_function ; GO:0003674 | no biological data available
FBgn0011582	Dop1R1	0	0	1	0	0	0	0	FastEpistasis	FBgn0011582	Dop1R1		thermosensory behavior ; GO:0040040 | inferred from mutant phenotype <newline> G protein-coupled receptor signaling pathway, coupled to cyclic nucleotide second messenger ; GO:0007187 | inferred from biological aspect of ancestor with PANTHER:PTN000664111 <newline> memory ; GO:0007613 | inferred from mutant phenotype <newline> visual learning ; GO:0008542 | inferred from mutant phenotype <newline…	integral component of membrane ; GO:0016021 | inferred from sequence or structural similarity <newline> integral component of plasma membrane ; GO:0005887 | inferred from biological aspect of ancestor with PANTHER:PTN000664111 <newline> integral component of plasma membrane ; GO:0005887 | inferred from sequence model <newline> dendrite ; GO:0030425 | inferred from biological aspect of ancestor wi…	G protein-coupled receptor activity ; GO:0004930 | inferred from biological aspect of ancestor with PANTHER:PTN000664111 <newline> G protein-coupled receptor activity ; GO:0004930 | inferred from sequence or structural similarity <newline> G protein-coupled serotonin receptor activity ; GO:0004993 | inferred from biological aspect of ancestor with PANTHER:PTN000664111 <newline> dopamine neurotran…
FBgn0034135	Syn2	0	0	0	1	0	0	0	FastEpistasis	FBgn0034135	Syn2		rhabdomere development ; GO:0042052 | inferred from mutant phenotype <newline> eye development ; GO:0001654 | inferred from mutant phenotype <newline> locomotion ; GO:0040011 | inferred from mutant phenotype <newline> regulation of synaptic growth at neuromuscular junction ; GO:0008582 | inferred from genetic interaction with Nsf2	syntrophin complex ; GO:0016013 | inferred from sequence or structural similarity with HGNC:13740 inferred from sequence or structural similarity with HGNC:13741 <newline> dystrophin-associated glycoprotein complex ; GO:0016010 | inferred from biological aspect of ancestor with PANTHER:PTN000830970	structural constituent of muscle ; GO:0008307 | inferred from sequence or structural similarity with HGNC:13740 inferred from sequence or structural similarity with HGNC:13741
FBgn0036136	Ufd1-like	0	0	0	0	0	0	1	FastEpistasis	FBgn0036136	Ufd1-like		proteolysis ; GO:0006508 | inferred from mutant phenotype <newline> negative regulation of smoothened signaling pathway ; GO:0045879 | inferred from mutant phenotype <newline> positive regulation of proteasomal ubiquitin-dependent protein catabolic process ; GO:0032436 | inferred from mutant phenotype <newline> ER-associated misfolded protein catabolic process ; GO:0071712 | inferred from biologi…	VCP-NPL4-UFD1 AAA ATPase complex ; GO:0034098 | inferred from biological aspect of ancestor with PANTHER:PTN000285104 <newline> proteasome complex ; GO:0000502 | non-traceable author statement	ubiquitin protein ligase binding ; GO:0031625 | inferred from physical interaction with Roc1a <newline> polyubiquitin modification-dependent protein binding ; GO:0031593 | inferred from biological aspect of ancestor with PANTHER:PTN000285104
FBgn0264006	dysc	0	0	0	0	0	1	0	FastLMM	FBgn0264006	dysc		positive regulation of ion transmembrane transporter activity ; GO:0032414 | inferred from mutant phenotype <newline> rhabdomere development ; GO:0042052 | inferred from biological aspect of ancestor with PANTHER:PTN001897746 <newline> regulation of synaptic growth at neuromuscular junction ; GO:0008582 | inferred from mutant phenotype <newline> rhabdomere development ; GO:0042052 | inferred from…	synapse ; GO:0045202 | inferred from direct assay <newline> photoreceptor connecting cilium ; GO:0032391 | colocalizes_with inferred from biological aspect of ancestor with PANTHER:PTN000563297 <newline> photoreceptor inner segment ; GO:0001917 | colocalizes_with inferred from biological aspect of ancestor with PANTHER:PTN000563297 <newline> stereocilium ; GO:0032420 | inferred from biological as…	molecular_function ; GO:0003674 | no biological data available
FBgn0046113	GluRIIC	0	0	0	0	0	1	0	FastLMM	FBgn0046113	GluRIIC		chemical synaptic transmission ; GO:0007268 | inferred from mutant phenotype <newline> synaptic transmission, glutamatergic ; GO:0035249 | inferred from biological aspect of ancestor with PANTHER:PTN001826301 <newline> synaptic transmission, glutamatergic ; GO:0035249 | inferred by curator from GO:0007274,GO:0008328 <newline> neuromuscular synaptic transmission ; GO:0007274 | inferred from expres…	muscle cell postsynaptic specialization ; GO:0097482 | inferred from direct assay <newline> postsynaptic membrane ; GO:0045211 | inferred from biological aspect of ancestor with PANTHER:PTN001826301 <newline> ionotropic glutamate receptor complex ; GO:0008328 | inferred from mutant phenotype <newline> plasma membrane ; GO:0005886 | inferred from biological aspect of ancestor with PANTHER:PTN00043…	ionotropic glutamate receptor activity ; GO:0004970 | inferred by curator from GO:0008328 <newline> glutamate receptor activity ; GO:0008066 | non-traceable author statement <newline> transmitter-gated ion channel activity involved in regulation of postsynaptic membrane potential ; GO:1904315 | inferred from biological aspect of ancestor with PANTHER:PTN001826301 <newline> glutamate-gated calcium…
FBgn0039862	kek6	0	0	0	0	0	1	0	FastEpistasis	FBgn0039862	kek6		negative regulation of epidermal growth factor receptor signaling pathway ; GO:0042059 | NOT inferred from mutant phenotype <newline> regulation of synaptic plasticity ; GO:0048167 | inferred from mutant phenotype	integral component of plasma membrane ; GO:0005887 | inferred from sequence model <newline> axon ; GO:0030424 | inferred from direct assay <newline> type I terminal bouton ; GO:0061174 | inferred from direct assay	neurotrophin receptor activity ; GO:0005030 | inferred from direct assay <newline> neurotrophin binding ; GO:0043121 | inferred from physical interaction with spz5
FBgn0037613	Cks85A	0	1	0	0	0	1	0	FastLMM	FBgn0037613	Cks85A		endomitotic cell cycle ; GO:0007113 | inferred from mutant phenotype <newline> regulation of mitotic cell cycle ; GO:0007346 | inferred from biological aspect of ancestor with PANTHER:PTN000602176 <newline> mitotic cell cycle ; GO:0000278 | inferred from mutant phenotype <newline> positive regulation of cyclin-dependent protein serine/threonine kinase activity ; GO:0045737 | inferred from biologi…	SCF ubiquitin ligase complex ; GO:0019005 | inferred from direct assay <newline> cyclin-dependent protein kinase holoenzyme complex ; GO:0000307 | inferred from biological aspect of ancestor with PANTHER:PTN000602176 <newline> SCF ubiquitin ligase complex ; GO:0019005 | inferred from biological aspect of ancestor with PANTHER:PTN000602176	histone binding ; GO:0042393 | inferred from biological aspect of ancestor with PANTHER:PTN000602176 <newline> ubiquitin binding ; GO:0043130 | inferred from biological aspect of ancestor with PANTHER:PTN000602176 <newline> cyclin-dependent protein serine/threonine kinase activator activity ; GO:0061575 | inferred from biological aspect of ancestor with PANTHER:PTN000602176 <newline> protein kina…
FBgn0039647	jus	0	1	0	0	0	0	0	FastEpistasis	FBgn0039647	jus		response to mechanical stimulus ; GO:0009612 | inferred from genetic interaction with kcc <newline> mechanosensory behavior ; GO:0007638 | inferred from mutant phenotype <newline> regulation of membrane potential ; GO:0042391 | inferred from mutant phenotype <newline> response to mechanical stimulus ; GO:0009612 | inferred from mutant phenotype	-	-
FBgn0051721	Trim9	0	0	0	0	0	1	1	FastLMM_FastEpistasis	FBgn0051721	Trim9		peripheral nervous system neuron axonogenesis ; GO:0048936 | inferred from mutant phenotype inferred from genetic interaction with UniProtKB:A1Z920 <newline> netrin-activated signaling pathway ; GO:0038007 | inferred from mutant phenotype <newline> peripheral nervous system neuron axonogenesis ; GO:0048936 | inferred from mutant phenotype <newline> axonogenesis ; GO:0007409 | inferred from mutant…	intracellular ; GO:0005622 | inferred from electronic annotation with InterPro:IPR000315, InterPro:IPR003649 <newline> axonal growth cone ; GO:0044295 | inferred from mutant phenotype inferred from genetic interaction with UniProtKB:A1Z920	zinc ion binding ; GO:0008270 | inferred from electronic annotation with InterPro:IPR000315, InterPro:IPR001841 <newline> protein binding ; GO:0005515 | inferred from physical interaction with UniProtKB:A1Z920 inferred from physical interaction with UniProtKB:Q9VWB7 <newline> zinc ion binding ; GO:0008270 | inferred from sequence model <newline> ubiquitin protein ligase activity ; GO:0061630 | in…
FBgn0039269	veli	0	0	0	0	1	0	0	FastEpistasis	FBgn0039269	veli		regulation of synaptic growth at neuromuscular junction ; GO:0008582 | inferred from mutant phenotype <newline> establishment or maintenance of cell polarity ; GO:0007163 | non-traceable author statement <newline> protein localization to basolateral plasma membrane ; GO:1903361 | inferred from biological aspect of ancestor with PANTHER:PTN001019267 <newline> maintenance of epithelial cell apical/…	basolateral plasma membrane ; GO:0016323 | inferred from biological aspect of ancestor with PANTHER:PTN001019267 <newline> subapical complex ; GO:0035003 | inferred from direct assay <newline> cytoplasm ; GO:0005737 | inferred from high throughput direct assay <newline> postsynaptic membrane ; GO:0045211 | inferred from direct assay <newline> synapse ; GO:0045202 | inferred from biological aspect…	-
FBgn0031816	Rchy1	0	1	0	0	0	0	0	FastLMM	FBgn0031816	Rchy1		protein ubiquitination ; GO:0016567 | inferred from sequence or structural similarity with HGNC:17479	ubiquitin ligase complex ; GO:0000151 | inferred from sequence or structural similarity with HGNC:17479	zinc ion binding ; GO:0008270 | inferred from electronic annotation with InterPro:IPR001841, InterPro:IPR008913 <newline> ubiquitin-protein transferase activity ; GO:0004842 | inferred from sequence or structural similarity with HGNC:17479 inferred from sequence or structural similarity with UniProtKB:Q96PM5 <newline> zinc ion binding ; GO:0008270 | inferred from sequence model
FBgn0010114	hig	0	1	0	0	0	0	0	FastEpistasis	FBgn0010114	hig		synaptic target recognition ; GO:0008039 | inferred from mutant phenotype	neuronal cell body ; GO:0043025 | inferred from direct assay <newline> synaptic cleft ; GO:0043083 | inferred from direct assay	-
FBgn0035251	Vta1	0	0	0	0	0	0	1	FastLMM	FBgn0035251	Vta1		late endosome to vacuole transport via multivesicular body sorting pathway ; GO:0032511 | inferred from biological aspect of ancestor with PANTHER:PTN000297055 <newline> endosome transport via multivesicular body sorting pathway ; GO:0032509 | inferred from sequence or structural similarity with SGD:S000004171	ESCRT IV complex ; GO:1990621 | inferred from sequence or structural similarity with SGD:S000004171 <newline> multivesicular body ; GO:0005771 | inferred from biological aspect of ancestor with PANTHER:PTN000297055 <newline> multivesicular body ; GO:0005771 | inferred from sequence or structural similarity with SGD:S000004171	ATPase activator activity ; GO:0001671 | inferred from sequence or structural similarity with SGD:S000004171
FBgn0025674	CycK	1	0	1	0	1	0	0	FastLMM	FBgn0025674	CycK		positive regulation of DNA-templated transcription, elongation ; GO:0032786 | inferred from biological aspect of ancestor with PANTHER:PTN000002653 <newline> regulation of transcription by RNA polymerase II ; GO:0006357 | inferred from biological aspect of ancestor with PANTHER:PTN000002458	cyclin/CDK positive transcription elongation factor complex ; GO:0008024 | inferred from biological aspect of ancestor with PANTHER:PTN000002653 <newline> nucleus ; GO:0005634 | inferred from biological aspect of ancestor with PANTHER:PTN000002458	cyclin-dependent protein serine/threonine kinase activator activity ; GO:0061575 | inferred from biological aspect of ancestor with PANTHER:PTN000002653 <newline> protein binding ; GO:0005515 | inferred from physical interaction with UniProtKB:Q9VP22 <newline> cyclin-dependent protein serine/threonine kinase regulator activity ; GO:0016538 | inferred from biological aspect of ancestor with PANTHE…
FBgn0051646	DIP-theta	0	0	1	0	0	0	0	FastLMM	FBgn0051646	DIP-theta		synapse organization ; GO:0050808 | inferred from expression pattern	integral component of plasma membrane ; GO:0005887 | inferred from sequence model <newline> neuron projection ; GO:0043005 | inferred from biological aspect of ancestor with PANTHER:PTN000456776	-
FBgn0260943	Rbp6	0	1	0	0	0	0	1	FastLMM_FastEpistasis	FBgn0260943	Rbp6		regulation of RNA metabolic process ; GO:0051252 | inferred from biological aspect of ancestor with PANTHER:PTN002689974 <newline> stem cell development ; GO:0048864 | inferred from sequence or structural similarity with UniProtKB:Q920Q6	ribonucleoprotein complex ; GO:1990904 | inferred from biological aspect of ancestor with PANTHER:PTN002689974 <newline> polysome ; GO:0005844 | inferred from sequence or structural similarity with UniProtKB:Q920Q6 <newline> cytoplasm ; GO:0005737 | inferred from biological aspect of ancestor with PANTHER:PTN002690062 <newline> cytoplasm ; GO:0005737 | inferred from sequence or structural similar…	single-stranded RNA binding ; GO:0003727 | inferred from sequence or structural similarity with UniProtKB:Q920Q6 <newline> RNA binding ; GO:0003723 | inferred from biological aspect of ancestor with PANTHER:PTN002689974 <newline> poly(U) RNA binding ; GO:0008266 | inferred from sequence or structural similarity with UniProtKB:Q920Q6
FBgn0034743	RpS16	0	0	1	0	0	0	0	FastLMM	FBgn0034743	RpS16		translation ; GO:0006412 | inferred from electronic annotation with InterPro:IPR000754, InterPro:IPR020574 <newline> cytoplasmic translation ; GO:0002181 | inferred by curator from GO:0022626 <newline> cytoplasmic translation ; GO:0002181 | traceable author statement <newline> maturation of SSU-rRNA from tricistronic rRNA transcript (SSU-rRNA, 5.8S rRNA, LSU-rRNA) ; GO:0000462 | inferred from bio…	small ribosomal subunit ; GO:0015935 | inferred from biological aspect of ancestor with PANTHER:PTN000490829 <newline> cytosolic small ribosomal subunit ; GO:0022627 | traceable author statement <newline> cytosolic ribosome ; GO:0022626 | inferred from high throughput direct assay <newline> cytosolic small ribosomal subunit ; GO:0022627 | inferred from biological aspect of ancestor with PANTHER:P…	structural constituent of ribosome ; GO:0003735 | traceable author statement <newline> structural constituent of ribosome ; GO:0003735 | inferred from biological aspect of ancestor with PANTHER:PTN000490829 <newline> RNA binding ; GO:0003723 | inferred from biological aspect of ancestor with PANTHER:PTN000490829 <newline> structural constituent of ribosome ; GO:0003735 | inferred from high throug…
FBgn0036274	CG4328	0	0	0	1	0	0	0	FastLMM	FBgn0036274	CG4328		positive regulation of transcription by RNA polymerase II ; GO:0045944 | inferred from biological aspect of ancestor with PANTHER:PTN000654232 <newline> neuron differentiation ; GO:0030182 | inferred from biological aspect of ancestor with PANTHER:PTN000654232	nucleus ; GO:0005634 | inferred from biological aspect of ancestor with PANTHER:PTN000654232	RNA polymerase II regulatory region sequence-specific DNA binding ; GO:0000977 | inferred from biological aspect of ancestor with PANTHER:PTN000654232 <newline> DNA-binding transcription factor activity, RNA polymerase II-specific ; GO:0000981 | inferred from biological aspect of ancestor with PANTHER:PTN000654232
FBgn0005674	GluProRS	0	0	0	1	0	0	0	FastLMM	FBgn0005674	GluProRS		glutamyl-tRNA aminoacylation ; GO:0006424 | inferred from electronic annotation with InterPro:IPR004526 <newline> prolyl-tRNA aminoacylation ; GO:0006433 | inferred from biological aspect of ancestor with PANTHER:PTN000155236 <newline> glutamyl-tRNA aminoacylation ; GO:0006424 | traceable author statement <newline> prolyl-tRNA aminoacylation ; GO:0006433 | traceable author statement	aminoacyl-tRNA synthetase multienzyme complex ; GO:0017101 | inferred from direct assay <newline> aminoacyl-tRNA synthetase multienzyme complex ; GO:0017101 | inferred from biological aspect of ancestor with PANTHER:PTN000155236 <newline> cytoplasm ; GO:0005737 | traceable author statement <newline> cytoplasm ; GO:0005737 | inferred from biological aspect of ancestor with PANTHER:PTN000155236	glutamate-tRNA ligase activity ; GO:0004818 | inferred from electronic annotation with InterPro:IPR004526 <newline> ATP binding ; GO:0005524 | inferred from electronic annotation with InterPro:IPR000738, InterPro:IPR000924, InterPro:IPR001412, InterPro:IPR002314, InterPro:IPR004499, InterPro:IPR004526, InterPro:IPR016061, InterPro:IPR017449, InterPro:IPR020058, InterPro:IPR020059, InterPro:IPR020…
FBgn0259735	mtgo	0	0	1	0	0	0	0	FastLMM	FBgn0259735	mtgo		biological_process ; GO:0008150 | no biological data available	plasma membrane ; GO:0005886 | inferred from high throughput direct assay	molecular_function ; GO:0003674 | no biological data available
FBgn0085405	CG34376	0	1	0	0	0	0	0	FastEpistasis	FBgn0085405	CG34376		regulation of transcription by RNA polymerase II ; GO:0006357 | inferred from biological aspect of ancestor with PANTHER:PTN001135010	nucleus ; GO:0005634 | inferred from biological aspect of ancestor with PANTHER:PTN001135010	RNA polymerase II proximal promoter sequence-specific DNA binding ; GO:0000978 | inferred from sequence or structural similarity with UniProtKB:Q96BF6
FBgn0036838	CG3808	1	0	0	0	0	0	0	FastEpistasis	FBgn0036838	CG3808		RNA processing ; GO:0006396 | inferred from electronic annotation with InterPro:IPR010280	-	nucleic acid binding ; GO:0003676 | inferred from electronic annotation with InterPro:IPR000504 <newline> RNA methyltransferase activity ; GO:0008173 | inferred from electronic annotation with InterPro:IPR010280 <newline> mRNA binding ; GO:0003729 | inferred from sequence or structural similarity
FBgn0261565	Lmpt	0	0	0	1	0	0	0	FastLMM	FBgn0261565	Lmpt		defense response to fungus ; GO:0050832 | inferred from mutant phenotype	I band ; GO:0031674 | inferred from high throughput direct assay <newline> cytoplasm ; GO:0005737 | inferred from high throughput direct assay	zinc ion binding ; GO:0008270 | inferred from electronic annotation with InterPro:IPR001781, InterPro:IPR010442
FBgn0038784	CG4362	0	0	0	0	1	0	0	FastLMM	FBgn0038784	CG4362		-	-	-
FBgn0260660	Mp	0	0	0	0	1	0	0	FastLMM	FBgn0260660	Mp		cell adhesion ; GO:0007155 | inferred from electronic annotation with InterPro:IPR010515 <newline> basement membrane organization ; GO:0071711 | inferred from mutant phenotype <newline> cardiac muscle atrophy ; GO:0014899 | inferred from mutant phenotype <newline> motor neuron axon guidance ; GO:0008045 | inferred from mutant phenotype <newline> skeletal muscle atrophy ; GO:0014732 | inferred fro…	basement membrane ; GO:0005604 | inferred from electronic annotation with InterPro:IPR039070 <newline> collagen trimer ; GO:0005581 | inferred from sequence or structural similarity	structural molecule activity ; GO:0005198 | inferred from electronic annotation with InterPro:IPR010515 <newline> carbohydrate binding ; GO:0030246 | inferred from sequence or structural similarity with Lectin-galC1
FBgn0036773	CG13698	0	0	0	0	0	0	1	FastEpistasis	FBgn0036773	CG13698		-	-	-
FBgn0266696	Svil	0	0	1	0	1	1	1	FastLMM_FastEpistasis	FBgn0266696	Svil		cytoskeleton organization ; GO:0007010 | inferred from electronic annotation with InterPro:IPR003128, InterPro:IPR015628 <newline> biological_process ; GO:0008150 | no biological data available	cellular_component ; GO:0005575 | no biological data available	actin filament binding ; GO:0051015 | inferred from electronic annotation with InterPro:IPR007122
FBgn0029878	Pat1	0	0	1	0	0	0	0	FastLMM	FBgn0029878	Pat1		pole plasm oskar mRNA localization ; GO:0045451 | inferred from mutant phenotype <newline> regulation of microtubule-based movement ; GO:0060632 | inferred from mutant phenotype	kinesin complex ; GO:0005871 | inferred from physical interaction with Khc inferred from physical interaction with Klc	-
FBgn0027086	IleRS	0	0	0	0	0	0	1	FastLMM	FBgn0027086	IleRS		isoleucyl-tRNA aminoacylation ; GO:0006428 | traceable author statement <newline> isoleucyl-tRNA aminoacylation ; GO:0006428 | inferred from biological aspect of ancestor with PANTHER:PTN002449689	cytoplasm ; GO:0005737 | traceable author statement <newline> aminoacyl-tRNA synthetase multienzyme complex ; GO:0017101 | inferred from direct assay	ATP binding ; GO:0005524 | inferred from electronic annotation with InterPro:IPR001412, InterPro:IPR002300, InterPro:IPR002301, InterPro:IPR009080 <newline> aminoacyl-tRNA editing activity ; GO:0002161 | inferred from electronic annotation with InterPro:IPR009008 <newline> tRNA binding ; GO:0000049 | inferred from electronic annotation with InterPro:IPR033709 <newline> isoleucine-tRNA ligase acti…
FBgn0052311	zormin	0	0	1	0	0	0	0	FastEpistasis	FBgn0052311	zormin		-	Z disc ; GO:0030018 | inferred from direct assay <newline> M band ; GO:0031430 | inferred from direct assay <newline> Z disc ; GO:0030018 | inferred from physical interaction with rols	actin binding ; GO:0003779 | inferred from direct assay <newline> protein binding ; GO:0005515 | inferred from physical interaction with rols
FBgn0031065	CG14234	1	0	0	0	0	0	0	FastLMM	FBgn0031065	CG14234		positive regulation of canonical Wnt signaling pathway ; GO:0090263 | inferred from electronic annotation with InterPro:IPR040236	plasma membrane ; GO:0005886 | inferred from biological aspect of ancestor with PANTHER:PTN001581954	-
FBgn0267033	mamo	0	0	0	1	1	0	1	FastLMM_FastEpistasis	FBgn0267033	mamo		gamete generation ; GO:0007276 | inferred from mutant phenotype <newline> female meiotic nuclear division ; GO:0007143 | inferred from mutant phenotype <newline> regulation of chromatin organization ; GO:1902275 | inferred from mutant phenotype <newline> sperm chromatin decondensation ; GO:0035041 | inferred from mutant phenotype <newline> regulation of transcription by RNA polymerase II ; GO:000…	nucleus ; GO:0005634 | inferred from biological aspect of ancestor with PANTHER:PTN001135010 <newline> cytoplasm ; GO:0005737 | inferred from direct assay <newline> nucleus ; GO:0005634 | inferred from direct assay <newline> nuclear chromosome ; GO:0000228 | inferred from direct assay	chromatin binding ; GO:0003682 | inferred from direct assay <newline> sequence-specific DNA binding ; GO:0043565 | inferred from direct assay
FBgn0042630	Sox21b	0	1	0	0	0	0	0	FastEpistasis	FBgn0042630	Sox21b		cell differentiation ; GO:0030154 | inferred from biological aspect of ancestor with PANTHER:PTN000030384 <newline> anatomical structure morphogenesis ; GO:0009653 | inferred from biological aspect of ancestor with PANTHER:PTN000030384 <newline> regulation of transcription, DNA-templated ; GO:0006355 | inferred from biological aspect of ancestor with PANTHER:PTN000030384	nucleus ; GO:0005634 | inferred from biological aspect of ancestor with PANTHER:PTN000030384 <newline> nuclear transcription factor complex ; GO:0044798 | inferred from biological aspect of ancestor with PANTHER:PTN000030384	DNA-binding transcription factor activity, RNA polymerase II-specific ; GO:0000981 | inferred from biological aspect of ancestor with PANTHER:PTN000030384
FBgn0051163	SKIP	0	0	0	0	0	0	1	FastEpistasis	FBgn0051163	SKIP		sensory perception of smell ; GO:0007608 | inferred from mutant phenotype	-	-
FBgn0085427	CG34398	0	1	0	0	0	0	0	FastEpistasis	FBgn0085427	CG34398		-	-	-
FBgn0086778	nAChRalpha7	0	0	0	1	0	0	0	FastEpistasis	FBgn0086778	nAChRalpha7		jump response ; GO:0007630 | inferred from mutant phenotype <newline> cation transport ; GO:0006812 | inferred from direct assay <newline> regulation of membrane potential ; GO:0042391 | inferred from biological aspect of ancestor with PANTHER:PTN000434994 <newline> chemical synaptic transmission ; GO:0007268 | inferred from mutant phenotype <newline> synaptic transmission, cholinergic ; GO:00072…	postsynaptic membrane ; GO:0045211 | inferred from electronic annotation with InterPro:IPR002394 <newline> acetylcholine-gated channel complex ; GO:0005892 | inferred from sequence or structural similarity <newline> dendrite ; GO:0030425 | inferred from direct assay <newline> integral component of plasma membrane ; GO:0005887 | inferred from biological aspect of ancestor with PANTHER:PTN000434994…	transmembrane signaling receptor activity ; GO:0004888 | inferred from electronic annotation with InterPro:IPR006201 <newline> acetylcholine-gated cation-selective channel activity ; GO:0022848 | inferred from direct assay <newline> acetylcholine-gated cation-selective channel activity ; GO:0022848 | inferred from sequence or structural similarity
FBgn0036900	CG8765	0	0	0	0	0	0	1	FastLMM	FBgn0036900	CG8765		regulation of transcription by RNA polymerase II ; GO:0006357 | inferred from biological aspect of ancestor with PANTHER:PTN000956409 <newline> dendrite morphogenesis ; GO:0048813 | inferred from mutant phenotype	nucleus ; GO:0005634 | inferred from biological aspect of ancestor with PANTHER:PTN000956409 <newline> transcription factor complex ; GO:0005667 | inferred from biological aspect of ancestor with PANTHER:PTN000956409	molecular_function ; GO:0003674 | no biological data available
FBgn0266721	gammaSnap2	0	1	0	0	0	0	0	FastLMM	FBgn0266721	gammaSnap2		neurotransmitter secretion ; GO:0007269 | non-traceable author statement <newline> intracellular protein transport ; GO:0006886 | inferred from biological aspect of ancestor with PANTHER:PTN000349241 <newline> synaptic vesicle priming ; GO:0016082 | non-traceable author statement	SNARE complex ; GO:0031201 | inferred from biological aspect of ancestor with PANTHER:PTN000349241 <newline> cytoplasm ; GO:0005737 | non-traceable author statement <newline> vacuolar membrane ; GO:0005774 | inferred from biological aspect of ancestor with PANTHER:PTN000349241	soluble NSF attachment protein activity ; GO:0005483 | inferred from biological aspect of ancestor with PANTHER:PTN000349241 <newline> soluble NSF attachment protein activity ; GO:0005483 | non-traceable author statement <newline> syntaxin binding ; GO:0019905 | inferred from biological aspect of ancestor with PANTHER:PTN000349241
FBgn0030631	CG6227	0	0	0	0	0	1	0	FastLMM	FBgn0030631	CG6227		mRNA splicing, via spliceosome ; GO:0000398 | inferred from sequence or structural similarity with SGD:S000000441 <newline> mRNA splicing, via spliceosome ; GO:0000398 | inferred from biological aspect of ancestor with PANTHER:PTN002775706 <newline> regulation of alternative mRNA splicing, via spliceosome ; GO:0000381 | inferred from high throughput mutant phenotype	spliceosomal complex ; GO:0005681 | inferred from sequence or structural similarity with SGD:S000000441 <newline> nucleus ; GO:0005634 | inferred from biological aspect of ancestor with PANTHER:PTN002775706 <newline> nucleus ; GO:0005634 | inferred by curator from GO:0000381	ATP binding ; GO:0005524 | inferred from electronic annotation with InterPro:IPR011545 <newline> RNA helicase activity ; GO:0003724 | inferred from biological aspect of ancestor with PANTHER:PTN002772338 <newline> RNA binding ; GO:0003723 | inferred from biological aspect of ancestor with PANTHER:PTN002772338 <newline> RNA helicase activity ; GO:0003724 | inferred from sequence or structural simi…
FBgn0037617	nom	0	0	0	0	0	1	0	FastLMM	FBgn0037617	nom		regulation of transcription, DNA-templated ; GO:0006355 | inferred from biological aspect of ancestor with PANTHER:PTN001227002 <newline> larval somatic muscle development ; GO:0007526 | inferred from expression pattern inferred from mutant phenotype	nucleus ; GO:0005634 | inferred from biological aspect of ancestor with PANTHER:PTN001227002	zinc ion binding ; GO:0008270 | inferred from electronic annotation with InterPro:IPR012934 <newline> DNA binding ; GO:0003677 | inferred from biological aspect of ancestor with PANTHER:PTN001227002 <newline> DNA binding ; GO:0003677 | inferred from direct assay <newline> DNA-binding transcription factor activity ; GO:0003700 | inferred from biological aspect of ancestor with PANTHER:PTN001227002
FBgn0266756	btsz	0	1	0	0	0	0	0	FastLMM	FBgn0266756	btsz		intracellular protein transport ; GO:0006886 | inferred from electronic annotation with InterPro:IPR010911 <newline> lumen formation, open tracheal system ; GO:0035149 | inferred from mutant phenotype <newline> cortical actin cytoskeleton organization ; GO:0030866 | inferred from mutant phenotype <newline> gastrulation involving germ band extension ; GO:0010004 | inferred from mutant phenotype <n…	plasma membrane ; GO:0005886 | inferred from biological aspect of ancestor with PANTHER:PTN000001477 <newline> exocytic vesicle ; GO:0070382 | inferred from biological aspect of ancestor with PANTHER:PTN000001477 <newline> apical plasma membrane ; GO:0016324 | inferred from direct assay	Rab GTPase binding ; GO:0017137 | inferred from electronic annotation with InterPro:IPR010911 <newline> neurexin family protein binding ; GO:0042043 | inferred from biological aspect of ancestor with PANTHER:PTN005238642
FBgn0028847	CG9014	0	0	0	0	0	0	1	FastLMM	FBgn0028847	CG9014		protein polyubiquitination ; GO:0000209 | inferred from sequence or structural similarity with HGNC:18401	cellular_component ; GO:0005575 | no biological data available	ubiquitin protein ligase activity ; GO:0061630 | inferred from electronic annotation with InterPro:IPR015036 <newline> ubiquitin-protein transferase activity ; GO:0004842 | inferred from sequence or structural similarity with HGNC:18401 <newline> zinc ion binding ; GO:0008270 | inferred from sequence model
FBgn0051004	mesh	0	0	0	1	0	0	0	FastLMM	FBgn0051004	mesh		cell-matrix adhesion ; GO:0007160 | inferred from electronic annotation with InterPro:IPR003886 <newline> smooth septate junction assembly ; GO:0090528 | inferred from mutant phenotype	smooth septate junction ; GO:0005920 | inferred from direct assay <newline> smooth septate junction ; GO:0005920 |	protein binding ; GO:0005515 | inferred from physical interaction with UniProtKB:Q9VW87 <newline> protein binding ; GO:0005515 | inferred from physical interaction with UniProtKB:O46101
FBgn0263706	CG43658	0	1	0	0	0	0	0	FastEpistasis	FBgn0263706	CG43658		regulation of Rho protein signal transduction ; GO:0035023 | inferred from electronic annotation with InterPro:IPR000219 <newline> actin cytoskeleton organization ; GO:0030036 | inferred from biological aspect of ancestor with PANTHER:PTN000984074 <newline> positive regulation of Rho protein signal transduction ; GO:0035025 | inferred by curator from GO:0005089 <newline> imaginal disc-derived leg…	cellular_component ; GO:0005575 | no biological data available	guanyl-nucleotide exchange factor activity ; GO:0005085 | inferred from biological aspect of ancestor with PANTHER:PTN000984074 <newline> Rho guanyl-nucleotide exchange factor activity ; GO:0005089 | inferred from sequence or structural similarity with HGNC:14103 <newline> Rho guanyl-nucleotide exchange factor activity ; GO:0005089 | inferred from biological aspect of ancestor with PANTHER:PTN000…
FBgn0052369	CG32369	0	1	0	0	0	0	0	FastEpistasis	FBgn0052369	CG32369		-	-	zinc ion binding ; GO:0008270 | inferred from sequence model
FBgn0033538	CG11883	0	1	0	0	0	0	0	FastLMM	FBgn0033538	CG11883		nucleotide catabolic process ; GO:0009166 | inferred from electronic annotation with InterPro:IPR006179, InterPro:IPR008334	-	hydrolase activity ; GO:0016787 | inferred from electronic annotation with InterPro:IPR004843, InterPro:IPR006179, InterPro:IPR008334
FBgn0053516	dpr3	0	0	1	0	0	0	0	FastEpistasis	FBgn0053516	dpr3		store-operated calcium entry ; GO:0002115 | inferred from mutant phenotype <newline> sensory perception of chemical stimulus ; GO:0007606 | inferred from sequence or structural similarity with dpr1 <newline> synapse organization ; GO:0050808 | inferred from biological aspect of ancestor with PANTHER:PTN000589413 <newline> synapse organization ; GO:0050808 | inferred from expression pattern	integral component of plasma membrane ; GO:0005887 | inferred from sequence model <newline> neuron projection membrane ; GO:0032589 | inferred from biological aspect of ancestor with PANTHER:PTN000589413	molecular_function ; GO:0003674 | no biological data available
FBgn0261871	dpr2	0	0	0	0	1	0	0	FastEpistasis	FBgn0261871	dpr2		sensory perception of chemical stimulus ; GO:0007606 | inferred from sequence or structural similarity with dpr1 <newline> synapse organization ; GO:0050808 | inferred from expression pattern <newline> synapse organization ; GO:0050808 | inferred from biological aspect of ancestor with PANTHER:PTN000589413	neuron projection membrane ; GO:0032589 | inferred from biological aspect of ancestor with PANTHER:PTN000589413 <newline> integral component of plasma membrane ; GO:0005887 | inferred from sequence model	molecular_function ; GO:0003674 | no biological data available
FBgn0033638	CG9005	0	0	0	0	0	1	0	FastLMM	FBgn0033638	CG9005		response to endoplasmic reticulum stress ; GO:0034976 | inferred from mutant phenotype	cellular_component ; GO:0005575 | no biological data available	molecular_function ; GO:0003674 | no biological data available
FBgn0035285	CG12025	0	0	0	1	0	0	0	FastLMM	FBgn0035285	CG12025		-	-	-
FBgn0035750	CG14826	0	0	0	0	0	1	0	FastEpistasis	FBgn0035750	CG14826		biological_process ; GO:0008150 | no biological data available	cellular_component ; GO:0005575 | no biological data available	molecular_function ; GO:0003674 | no biological data available
FBgn0038750	CG4465	1	0	0	0	0	0	0	FastEpistasis	FBgn0038750	CG4465		transmembrane transport ; GO:0055085 | inferred from electronic annotation with InterPro:IPR011701	integral component of membrane ; GO:0016021 | inferred from electronic annotation with InterPro:IPR011701	-
FBgn0066101	LpR1	0	0	0	0	1	0	0	FastEpistasis	FBgn0066101	LpR1		receptor-mediated endocytosis ; GO:0006898 | inferred from expression pattern inferred from mutant phenotype	-	calcium ion binding ; GO:0005509 | inferred from electronic annotation with InterPro:IPR001881, InterPro:IPR018097 <newline> cargo receptor activity ; GO:0038024 | inferred from mutant phenotype
FBgn0051869	CG31869	0	0	0	0	0	1	0	FastEpistasis	FBgn0051869	CG31869		-	-	-
FBgn0053970	CG33970	0	0	1	0	0	0	0	FastEpistasis	FBgn0053970	CG33970		transmembrane transport ; GO:0055085 | inferred from electronic annotation with InterPro:IPR000412	ATP-binding cassette (ABC) transporter complex ; GO:0043190 | inferred from electronic annotation with InterPro:IPR000412	ATPase activity ; GO:0016887 | inferred from electronic annotation with InterPro:IPR003439, InterPro:IPR017871 <newline> ATP binding ; GO:0005524 | inferred from electronic annotation with InterPro:IPR003439, InterPro:IPR017871
FBgn0085426	Rgk3	0	0	0	0	0	0	1	FastEpistasis	FBgn0085426	Rgk3		signal transduction ; GO:0007165 | inferred from electronic annotation with InterPro:IPR020849 <newline> negative regulation of voltage-gated calcium channel activity ; GO:1901386 | inferred from direct assay <newline> small GTPase mediated signal transduction ; GO:0007264 | inferred from sequence model	cytoplasmic side of plasma membrane ; GO:0009898 | inferred from sequence model <newline> plasma membrane ; GO:0005886 | inferred from biological aspect of ancestor with PANTHER:PTN000632293	GTPase activity ; GO:0003924 | inferred from electronic annotation with InterPro:IPR001806 <newline> GTPase activity ; GO:0003924 | inferred from sequence model <newline> GTP binding ; GO:0005525 | inferred from sequence model <newline> calcium channel regulator activity ; GO:0005246 | inferred from biological aspect of ancestor with PANTHER:PTN000632293 <newline> GTP binding ; GO:0005525 | infer…

## Sheet: Supplementary File 2d
Principal Network Component (PNC) formed by genes and gene products from cardiac GWAS (refers to figure 2B)
details on the interactions
SUID	interaction	name	selected	shared interaction	shared name	type_of_interaction
289839	interacts with	FBgn0053970 (interacts with) FBgn0033194	true	interacts with	FBgn0053970 (interacts with) FBgn0033194	physical_interaction
289840	interacts with	FBgn0053970 (interacts with) FBgn0015622	true	interacts with	FBgn0053970 (interacts with) FBgn0015622	physical_interaction
289841	interacts with	FBgn0053970 (interacts with) FBgn0004924	true	interacts with	FBgn0053970 (interacts with) FBgn0004924	physical_interaction
289842	interacts with	FBgn0051869 (interacts with) FBgn0259481	true	interacts with	FBgn0051869 (interacts with) FBgn0259481	physical_interaction
289843	interacts with	FBgn0051869 (interacts with) FBgn0036274	true	interacts with	FBgn0051869 (interacts with) FBgn0036274	physical_interaction
289845	interacts with	FBgn0066101 (interacts with) FBgn0259481	true	interacts with	FBgn0066101 (interacts with) FBgn0259481	physical_interaction
289846	interacts with	FBgn0038750 (interacts with) FBgn0265523	true	interacts with	FBgn0038750 (interacts with) FBgn0265523	physical_interaction
289847	interacts with	FBgn0035750 (interacts with) FBgn0015622	true	interacts with	FBgn0035750 (interacts with) FBgn0015622	physical_interaction
289848	interacts with	FBgn0035750 (interacts with) FBgn0014009	true	interacts with	FBgn0035750 (interacts with) FBgn0014009	physical_interaction
289849	interacts with	FBgn0033538 (interacts with) FBgn0036274	true	interacts with	FBgn0033538 (interacts with) FBgn0036274	physical_interaction
289850	interacts with	FBgn0033538 (interacts with) FBgn0003896	true	interacts with	FBgn0033538 (interacts with) FBgn0003896	physical_interaction
289851	interacts with	FBgn0052369 (interacts with) FBgn0283521	true	interacts with	FBgn0052369 (interacts with) FBgn0283521	physical_interaction
289852	interacts with	FBgn0052369 (interacts with) FBgn0034743	true	interacts with	FBgn0052369 (interacts with) FBgn0034743	physical_interaction
289853	interacts with	FBgn0052369 (interacts with) FBgn0028847	true	interacts with	FBgn0052369 (interacts with) FBgn0028847	physical_interaction
289854	interacts with	FBgn0052369 (interacts with) FBgn0010265	true	interacts with	FBgn0052369 (interacts with) FBgn0010265	physical_interaction
289855	interacts with	FBgn0052369 (interacts with) FBgn0003896	true	interacts with	FBgn0052369 (interacts with) FBgn0003896	physical_interaction
289856	interacts with	FBgn0051004 (interacts with) FBgn0085405	true	interacts with	FBgn0051004 (interacts with) FBgn0085405	physical_interaction
289859	interacts with	FBgn0030631 (interacts with) FBgn0004924	true	interacts with	FBgn0030631 (interacts with) FBgn0004924	physical_interaction
289860	interacts with	FBgn0036900 (interacts with) FBgn0035251	true	interacts with	FBgn0036900 (interacts with) FBgn0035251	physical_interaction
289864	interacts with	FBgn0267033 (interacts with) FBgn0025674	true	interacts with	FBgn0267033 (interacts with) FBgn0025674	physical_interaction
289865	interacts with	FBgn0052311 (interacts with) FBgn0010265	true	interacts with	FBgn0052311 (interacts with) FBgn0010265	physical_interaction
289867	interacts with	FBgn0027086 (interacts with) FBgn0005674	true	interacts with	FBgn0027086 (interacts with) FBgn0005674	physical_interaction
289868	interacts with	FBgn0029878 (interacts with) FBgn0052311	true	interacts with	FBgn0029878 (interacts with) FBgn0052311	physical_interaction
289869	interacts with	FBgn0029878 (interacts with) FBgn0036274	true	interacts with	FBgn0029878 (interacts with) FBgn0036274	physical_interaction
289873	interacts with	FBgn0261565 (interacts with) FBgn0028847	true	interacts with	FBgn0261565 (interacts with) FBgn0028847	physical_interaction
289874	interacts with	FBgn0085405 (interacts with) FBgn0036274	true	interacts with	FBgn0085405 (interacts with) FBgn0036274	physical_interaction
289875	interacts with	FBgn0005674 (interacts with) FBgn0015622	true	interacts with	FBgn0005674 (interacts with) FBgn0015622	physical_interaction
289876	interacts with	FBgn0051646 (interacts with) FBgn0261871	true	interacts with	FBgn0051646 (interacts with) FBgn0261871	physical_interaction
289877	interacts with	FBgn0051646 (interacts with) FBgn0053516	true	interacts with	FBgn0051646 (interacts with) FBgn0053516	physical_interaction
289878	interacts with	FBgn0025674 (interacts with) FBgn0263706	true	interacts with	FBgn0025674 (interacts with) FBgn0263706	physical_interaction
289879	interacts with	FBgn0025674 (interacts with) FBgn0261673	true	interacts with	FBgn0025674 (interacts with) FBgn0261673	physical_interaction
289880	interacts with	FBgn0025674 (interacts with) FBgn0260943	true	interacts with	FBgn0025674 (interacts with) FBgn0260943	physical_interaction
289881	interacts with	FBgn0025674 (interacts with) FBgn0028509	true	interacts with	FBgn0025674 (interacts with) FBgn0028509	physical_interaction
289882	interacts with	FBgn0025674 (interacts with) FBgn0011260	true	interacts with	FBgn0025674 (interacts with) FBgn0011260	physical_interaction
289883	interacts with	FBgn0025674 (interacts with) FBgn0011224	true	interacts with	FBgn0025674 (interacts with) FBgn0011224	physical_interaction
289884	interacts with	FBgn0025674 (interacts with) FBgn0010113	true	interacts with	FBgn0025674 (interacts with) FBgn0010113	physical_interaction
289885	interacts with	FBgn0035251 (interacts with) FBgn0036257	true	interacts with	FBgn0035251 (interacts with) FBgn0036257	physical_interaction
289887	interacts with	FBgn0010114 (interacts with) FBgn0086778	true	interacts with	FBgn0010114 (interacts with) FBgn0086778	physical_interaction
289888	interacts with	FBgn0010114 (interacts with) FBgn0085427	true	interacts with	FBgn0010114 (interacts with) FBgn0085427	physical_interaction
289889	interacts with	FBgn0010114 (interacts with) FBgn0032151	true	interacts with	FBgn0010114 (interacts with) FBgn0032151	physical_interaction
289891	interacts with	FBgn0039269 (interacts with) FBgn0003731	true	interacts with	FBgn0039269 (interacts with) FBgn0003731	physical_interaction
289892	interacts with	FBgn0051721 (interacts with) FBgn0261811	true	interacts with	FBgn0051721 (interacts with) FBgn0261811	physical_interaction
289893	interacts with	FBgn0051721 (interacts with) FBgn0259176	true	interacts with	FBgn0051721 (interacts with) FBgn0259176	physical_interaction
289894	interacts with	FBgn0039647 (interacts with) FBgn0085387	true	interacts with	FBgn0039647 (interacts with) FBgn0085387	genetic_interaction
289895	interacts with	FBgn0039647 (interacts with) FBgn0004924	true	interacts with	FBgn0039647 (interacts with) FBgn0004924	genetic_interaction
289896	interacts with	FBgn0039647 (interacts with) FBgn0003380	true	interacts with	FBgn0039647 (interacts with) FBgn0003380	genetic_interaction
289897	interacts with	FBgn0039647 (interacts with) FBgn0026206	true	interacts with	FBgn0039647 (interacts with) FBgn0026206	genetic_interaction
289898	interacts with	FBgn0037613 (interacts with) FBgn0028509	true	interacts with	FBgn0037613 (interacts with) FBgn0028509	physical_interaction
289899	interacts with	FBgn0037613 (interacts with) FBgn0025674	true	interacts with	FBgn0037613 (interacts with) FBgn0025674	physical_interaction
289900	interacts with	FBgn0037613 (interacts with) FBgn0011224	true	interacts with	FBgn0037613 (interacts with) FBgn0011224	physical_interaction
289901	interacts with	FBgn0046113 (interacts with) FBgn0265416	true	interacts with	FBgn0046113 (interacts with) FBgn0265416	physical_interaction
289903	interacts with	FBgn0265416 (interacts with) FBgn0264493	true	interacts with	FBgn0265416 (interacts with) FBgn0264493	physical_interaction
289904	interacts with	FBgn0265416 (interacts with) FBgn0035285	true	interacts with	FBgn0265416 (interacts with) FBgn0035285	physical_interaction
289905	interacts with	FBgn0265416 (interacts with) FBgn0010265	true	interacts with	FBgn0265416 (interacts with) FBgn0010265	physical_interaction
289906	interacts with	FBgn0032151 (interacts with) FBgn0086778	true	interacts with	FBgn0032151 (interacts with) FBgn0086778	physical_interaction
289907	interacts with	FBgn0014009 (interacts with) FBgn0285911	true	interacts with	FBgn0014009 (interacts with) FBgn0285911	physical_interaction
289908	interacts with	FBgn0083975 (interacts with) FBgn0004244	true	interacts with	FBgn0083975 (interacts with) FBgn0004244	genetic_interaction
289909	interacts with	FBgn0000536 (interacts with) FBgn0085387	true	interacts with	FBgn0000536 (interacts with) FBgn0085387	genetic_interaction
289910	interacts with	FBgn0000536 (interacts with) FBgn0026206	true	interacts with	FBgn0000536 (interacts with) FBgn0026206	genetic_interaction
289911	interacts with	FBgn0000536 (interacts with) FBgn0004924	true	interacts with	FBgn0000536 (interacts with) FBgn0004924	genetic_interaction
289912	interacts with	FBgn0043070 (interacts with) FBgn0014009	true	interacts with	FBgn0043070 (interacts with) FBgn0014009	physical_interaction
289913	interacts with	FBgn0043070 (interacts with) FBgn0011661	true	interacts with	FBgn0043070 (interacts with) FBgn0011661	physical_interaction
289914	interacts with	FBgn0041096 (interacts with) FBgn0052311	true	interacts with	FBgn0041096 (interacts with) FBgn0052311	physical_interaction
289915	interacts with	FBgn0041096 (interacts with) FBgn0051163	true	interacts with	FBgn0041096 (interacts with) FBgn0051163	physical_interaction
289916	interacts with	FBgn0041096 (interacts with) FBgn0035285	true	interacts with	FBgn0041096 (interacts with) FBgn0035285	physical_interaction
289917	interacts with	FBgn0041096 (interacts with) FBgn0028622	true	interacts with	FBgn0041096 (interacts with) FBgn0028622	physical_interaction
289918	interacts with	FBgn0014135 (interacts with) FBgn0003499	true	interacts with	FBgn0014135 (interacts with) FBgn0003499	genetic_interaction
289919	interacts with	FBgn0014135 (interacts with) FBgn0259211	true	interacts with	FBgn0014135 (interacts with) FBgn0259211	genetic_interaction
289920	interacts with	FBgn0028622 (interacts with) FBgn0003386	true	interacts with	FBgn0028622 (interacts with) FBgn0003386	genetic_interaction
289921	interacts with	FBgn0003129 (interacts with) FBgn0263930	true	interacts with	FBgn0003129 (interacts with) FBgn0263930	physical_interaction
289922	interacts with	FBgn0085424 (interacts with) FBgn0031816	true	interacts with	FBgn0085424 (interacts with) FBgn0031816	physical_interaction
289923	interacts with	FBgn0036257 (interacts with) FBgn0051646	true	interacts with	FBgn0036257 (interacts with) FBgn0051646	physical_interaction
289924	interacts with	FBgn0036257 (interacts with) FBgn0028509	true	interacts with	FBgn0036257 (interacts with) FBgn0028509	physical_interaction
289925	interacts with	FBgn0036257 (interacts with) FBgn0011224	true	interacts with	FBgn0036257 (interacts with) FBgn0011224	physical_interaction
289926	interacts with	FBgn0029830 (interacts with) FBgn0000547	true	interacts with	FBgn0029830 (interacts with) FBgn0000547	genetic_interaction
289927	interacts with	FBgn0024732 (interacts with) FBgn0259735	true	interacts with	FBgn0024732 (interacts with) FBgn0259735	physical_interaction
289928	interacts with	FBgn0024732 (interacts with) FBgn0035251	true	interacts with	FBgn0024732 (interacts with) FBgn0035251	physical_interaction
289929	interacts with	FBgn0024732 (interacts with) FBgn0031065	true	interacts with	FBgn0024732 (interacts with) FBgn0031065	physical_interaction
289930	interacts with	FBgn0010265 (interacts with) FBgn0034743	true	interacts with	FBgn0010265 (interacts with) FBgn0034743	physical_interaction
289931	interacts with	FBgn0003386 (interacts with) FBgn0003380	true	interacts with	FBgn0003386 (interacts with) FBgn0003380	genetic_interaction
289932	interacts with	FBgn0028369 (interacts with) FBgn0041096	true	interacts with	FBgn0028369 (interacts with) FBgn0041096	physical_interaction
289933	interacts with	FBgn0267001 (interacts with) FBgn0085426	true	interacts with	FBgn0267001 (interacts with) FBgn0085426	physical_interaction
289934	interacts with	FBgn0267001 (interacts with) FBgn0004449	true	interacts with	FBgn0267001 (interacts with) FBgn0004449	genetic_interaction
289935	interacts with	FBgn0004244 (interacts with) FBgn0085405	true	interacts with	FBgn0004244 (interacts with) FBgn0085405	physical_interaction
289936	interacts with	FBgn0004244 (interacts with) FBgn0083975	true	interacts with	FBgn0004244 (interacts with) FBgn0083975	physical_interaction
289937	interacts with	FBgn0004244 (interacts with) FBgn0036838	true	interacts with	FBgn0004244 (interacts with) FBgn0036838	physical_interaction
289938	interacts with	FBgn0051774 (interacts with) FBgn0003118	true	interacts with	FBgn0051774 (interacts with) FBgn0003118	genetic_interaction
289939	interacts with	FBgn0051774 (interacts with) FBgn0000547	true	interacts with	FBgn0051774 (interacts with) FBgn0000547	genetic_interaction
289940	interacts with	FBgn0036411 (interacts with) FBgn0003731	true	interacts with	FBgn0036411 (interacts with) FBgn0003731	genetic_interaction
289941	interacts with	FBgn0034366 (interacts with) FBgn0011224	true	interacts with	FBgn0034366 (interacts with) FBgn0011224	physical_interaction
289942	interacts with	FBgn0001078 (interacts with) FBgn0262582	true	interacts with	FBgn0001078 (interacts with) FBgn0262582	physical_interaction
289943	interacts with	FBgn0001078 (interacts with) FBgn0036773	true	interacts with	FBgn0001078 (interacts with) FBgn0036773	physical_interaction
289944	interacts with	FBgn0001078 (interacts with) FBgn0038922	true	interacts with	FBgn0001078 (interacts with) FBgn0038922	genetic_interaction
289945	interacts with	FBgn0265974 (interacts with) FBgn0035756	true	interacts with	FBgn0265974 (interacts with) FBgn0035756	physical_interaction
289946	interacts with	FBgn0011260 (interacts with) FBgn0004449	true	interacts with	FBgn0011260 (interacts with) FBgn0004449	physical_interaction
289947	interacts with	FBgn0263930 (interacts with) FBgn0003169	true	interacts with	FBgn0263930 (interacts with) FBgn0003169	genetic_interaction
289948	interacts with	FBgn0263930 (interacts with) FBgn0010415	true	interacts with	FBgn0263930 (interacts with) FBgn0010415	genetic_interaction
289949	interacts with	FBgn0004449 (interacts with) FBgn0267001	true	interacts with	FBgn0004449 (interacts with) FBgn0267001	physical_interaction
289950	interacts with	FBgn0015513 (interacts with) FBgn0041096	true	interacts with	FBgn0015513 (interacts with) FBgn0041096	physical_interaction
289952	interacts with	FBgn0010415 (interacts with) FBgn0265974	true	interacts with	FBgn0010415 (interacts with) FBgn0265974	genetic_interaction
289953	interacts with	FBgn0010415 (interacts with) FBgn0000464	true	interacts with	FBgn0010415 (interacts with) FBgn0000464	genetic_interaction
289954	interacts with	FBgn0264493 (interacts with) FBgn0033638	true	interacts with	FBgn0264493 (interacts with) FBgn0033638	physical_interaction
289955	interacts with	FBgn0264493 (interacts with) FBgn0003463	true	interacts with	FBgn0264493 (interacts with) FBgn0003463	physical_interaction
289959	interacts with	FBgn0011661 (interacts with) FBgn0266756	true	interacts with	FBgn0011661 (interacts with) FBgn0266756	physical_interaction
289960	interacts with	FBgn0011661 (interacts with) FBgn0037617	true	interacts with	FBgn0011661 (interacts with) FBgn0037617	physical_interaction
289961	interacts with	FBgn0011661 (interacts with) FBgn0029881	true	interacts with	FBgn0011661 (interacts with) FBgn0029881	physical_interaction
289962	interacts with	FBgn0011661 (interacts with) FBgn0004924	true	interacts with	FBgn0011661 (interacts with) FBgn0004924	physical_interaction
289963	interacts with	FBgn0031461 (interacts with) FBgn0032130	true	interacts with	FBgn0031461 (interacts with) FBgn0032130	physical_interaction
289964	interacts with	FBgn0031461 (interacts with) FBgn0011300	true	interacts with	FBgn0031461 (interacts with) FBgn0011300	genetic_interaction
289965	interacts with	FBgn0031461 (interacts with) FBgn0003169	true	interacts with	FBgn0031461 (interacts with) FBgn0003169	genetic_interaction
289966	interacts with	FBgn0011656 (interacts with) FBgn0266696	true	interacts with	FBgn0011656 (interacts with) FBgn0266696	physical_interaction
289970	interacts with	FBgn0284408 (interacts with) FBgn0265974	true	interacts with	FBgn0284408 (interacts with) FBgn0265974	genetic_interaction
289971	interacts with	FBgn0284408 (interacts with) FBgn0285896	true	interacts with	FBgn0284408 (interacts with) FBgn0285896	genetic_interaction
289972	interacts with	FBgn0284408 (interacts with) FBgn0014135	true	interacts with	FBgn0284408 (interacts with) FBgn0014135	genetic_interaction
289973	interacts with	FBgn0003169 (interacts with) FBgn0011300	true	interacts with	FBgn0003169 (interacts with) FBgn0011300	physical_interaction
289974	interacts with	FBgn0085450 (interacts with) FBgn0011300	true	interacts with	FBgn0085450 (interacts with) FBgn0011300	genetic_interaction
289975	interacts with	FBgn0031016 (interacts with) FBgn0039862	true	interacts with	FBgn0031016 (interacts with) FBgn0039862	physical_interaction
289977	interacts with	FBgn0261811 (interacts with) FBgn0003731	true	interacts with	FBgn0261811 (interacts with) FBgn0003731	genetic_interaction
289978	interacts with	FBgn0262582 (interacts with) FBgn0014343	true	interacts with	FBgn0262582 (interacts with) FBgn0014343	genetic_interaction
289979	interacts with	FBgn0262582 (interacts with) FBgn0003118	true	interacts with	FBgn0262582 (interacts with) FBgn0003118	genetic_interaction
289981	interacts with	FBgn0023214 (interacts with) FBgn0003118	true	interacts with	FBgn0023214 (interacts with) FBgn0003118	genetic_interaction
289982	interacts with	FBgn0004198 (interacts with) FBgn0053554	true	interacts with	FBgn0004198 (interacts with) FBgn0053554	genetic_interaction
289983	interacts with	FBgn0004198 (interacts with) FBgn0283521	true	interacts with	FBgn0004198 (interacts with) FBgn0283521	genetic_interaction
289984	interacts with	FBgn0004198 (interacts with) FBgn0011224	true	interacts with	FBgn0004198 (interacts with) FBgn0011224	genetic_interaction
289985	interacts with	FBgn0004198 (interacts with) FBgn0031461	true	interacts with	FBgn0004198 (interacts with) FBgn0031461	genetic_interaction
289986	interacts with	FBgn0004198 (interacts with) FBgn0000097	true	interacts with	FBgn0004198 (interacts with) FBgn0000097	genetic_interaction
289987	interacts with	FBgn0004198 (interacts with) FBgn0000256	true	interacts with	FBgn0004198 (interacts with) FBgn0000256	genetic_interaction
289988	interacts with	FBgn0265598 (interacts with) FBgn0003118	true	interacts with	FBgn0265598 (interacts with) FBgn0003118	genetic_interaction
289989	interacts with	FBgn0265598 (interacts with) FBgn0003896	true	interacts with	FBgn0265598 (interacts with) FBgn0003896	genetic_interaction
289990	interacts with	FBgn0265598 (interacts with) FBgn0085424	true	interacts with	FBgn0265598 (interacts with) FBgn0085424	genetic_interaction
289991	interacts with	FBgn0265598 (interacts with) FBgn0262582	true	interacts with	FBgn0265598 (interacts with) FBgn0262582	genetic_interaction
289992	interacts with	FBgn0000464 (interacts with) FBgn0010415	true	interacts with	FBgn0000464 (interacts with) FBgn0010415	physical_interaction
289993	interacts with	FBgn0000097 (interacts with) FBgn0023214	true	interacts with	FBgn0000097 (interacts with) FBgn0023214	physical_interaction
289994	interacts with	FBgn0000097 (interacts with) FBgn0259176	true	interacts with	FBgn0000097 (interacts with) FBgn0259176	genetic_interaction
289995	interacts with	FBgn0000097 (interacts with) FBgn0000547	true	interacts with	FBgn0000097 (interacts with) FBgn0000547	genetic_interaction
289996	interacts with	FBgn0000097 (interacts with) FBgn0004595	true	interacts with	FBgn0000097 (interacts with) FBgn0004595	genetic_interaction
289997	interacts with	FBgn0000097 (interacts with) FBgn0003118	true	interacts with	FBgn0000097 (interacts with) FBgn0003118	genetic_interaction
289998	interacts with	FBgn0266464 (interacts with) FBgn0266721	true	interacts with	FBgn0266464 (interacts with) FBgn0266721	physical_interaction
289999	interacts with	FBgn0266464 (interacts with) FBgn0036136	true	interacts with	FBgn0266464 (interacts with) FBgn0036136	genetic_interaction
290000	interacts with	FBgn0266464 (interacts with) FBgn0261617	true	interacts with	FBgn0266464 (interacts with) FBgn0261617	genetic_interaction
290001	interacts with	FBgn0266464 (interacts with) FBgn0034135	true	interacts with	FBgn0266464 (interacts with) FBgn0034135	genetic_interaction
290002	interacts with	FBgn0266464 (interacts with) FBgn0011661	true	interacts with	FBgn0266464 (interacts with) FBgn0011661	genetic_interaction
290003	interacts with	FBgn0266464 (interacts with) FBgn0283521	true	interacts with	FBgn0266464 (interacts with) FBgn0283521	genetic_interaction
290004	interacts with	FBgn0000256 (interacts with) FBgn0014009	true	interacts with	FBgn0000256 (interacts with) FBgn0014009	physical_interaction
290005	interacts with	FBgn0260003 (interacts with) FBgn0011260	true	interacts with	FBgn0260003 (interacts with) FBgn0011260	genetic_interaction
290006	interacts with	FBgn0260003 (interacts with) FBgn0264006	true	interacts with	FBgn0260003 (interacts with) FBgn0264006	genetic_interaction
290007	interacts with	FBgn0260003 (interacts with) FBgn0259211	true	interacts with	FBgn0260003 (interacts with) FBgn0259211	genetic_interaction
290008	interacts with	FBgn0260003 (interacts with) FBgn0032151	true	interacts with	FBgn0260003 (interacts with) FBgn0032151	genetic_interaction
290009	interacts with	FBgn0260003 (interacts with) FBgn0035142	true	interacts with	FBgn0260003 (interacts with) FBgn0035142	genetic_interaction
290010	interacts with	FBgn0260003 (interacts with) FBgn0010415	true	interacts with	FBgn0260003 (interacts with) FBgn0010415	genetic_interaction
290011	interacts with	FBgn0003118 (interacts with) FBgn0023214	true	interacts with	FBgn0003118 (interacts with) FBgn0023214	physical_interaction
290012	interacts with	FBgn0003118 (interacts with) FBgn0003944	true	interacts with	FBgn0003118 (interacts with) FBgn0003944	physical_interaction
290013	interacts with	FBgn0003118 (interacts with) FBgn0000547	true	interacts with	FBgn0003118 (interacts with) FBgn0000547	genetic_interaction
290014	interacts with	FBgn0003118 (interacts with) FBgn0003731	true	interacts with	FBgn0003118 (interacts with) FBgn0003731	genetic_interaction
290015	interacts with	FBgn0003118 (interacts with) FBgn0004595	true	interacts with	FBgn0003118 (interacts with) FBgn0004595	genetic_interaction
290018	interacts with	FBgn0035934 (interacts with) FBgn0085387	true	interacts with	FBgn0035934 (interacts with) FBgn0085387	genetic_interaction
290019	interacts with	FBgn0035934 (interacts with) FBgn0004244	true	interacts with	FBgn0035934 (interacts with) FBgn0004244	genetic_interaction
290020	interacts with	FBgn0035934 (interacts with) FBgn0011582	true	interacts with	FBgn0035934 (interacts with) FBgn0011582	genetic_interaction
290021	interacts with	FBgn0004652 (interacts with) FBgn0011260	true	interacts with	FBgn0004652 (interacts with) FBgn0011260	physical_interaction
290022	interacts with	FBgn0004652 (interacts with) FBgn0265523	true	interacts with	FBgn0004652 (interacts with) FBgn0265523	genetic_interaction
290023	interacts with	FBgn0003330 (interacts with) FBgn0259211	true	interacts with	FBgn0003330 (interacts with) FBgn0259211	physical_interaction
290024	interacts with	FBgn0003345 (interacts with) FBgn0011656	true	interacts with	FBgn0003345 (interacts with) FBgn0011656	physical_interaction
290025	interacts with	FBgn0003345 (interacts with) FBgn0003044	true	interacts with	FBgn0003345 (interacts with) FBgn0003044	genetic_interaction
290026	interacts with	FBgn0003507 (interacts with) FBgn0003944	true	interacts with	FBgn0003507 (interacts with) FBgn0003944	physical_interaction
290027	interacts with	FBgn0261617 (interacts with) FBgn0267791	true	interacts with	FBgn0261617 (interacts with) FBgn0267791	physical_interaction
290028	interacts with	FBgn0261617 (interacts with) FBgn0042630	true	interacts with	FBgn0261617 (interacts with) FBgn0042630	physical_interaction
290029	interacts with	FBgn0261617 (interacts with) FBgn0028509	true	interacts with	FBgn0261617 (interacts with) FBgn0028509	physical_interaction
290030	interacts with	FBgn0261617 (interacts with) FBgn0025674	true	interacts with	FBgn0261617 (interacts with) FBgn0025674	physical_interaction
290031	interacts with	FBgn0261617 (interacts with) FBgn0011224	true	interacts with	FBgn0261617 (interacts with) FBgn0011224	physical_interaction
290032	interacts with	FBgn0261617 (interacts with) FBgn0003731	true	interacts with	FBgn0261617 (interacts with) FBgn0003731	genetic_interaction
290033	interacts with	FBgn0261617 (interacts with) FBgn0003463	true	interacts with	FBgn0261617 (interacts with) FBgn0003463	genetic_interaction
290034	interacts with	FBgn0261617 (interacts with) FBgn0003507	true	interacts with	FBgn0261617 (interacts with) FBgn0003507	genetic_interaction
290035	interacts with	FBgn0261617 (interacts with) FBgn0003944	true	interacts with	FBgn0261617 (interacts with) FBgn0003944	genetic_interaction
290036	interacts with	FBgn0003944 (interacts with) FBgn0011656	true	interacts with	FBgn0003944 (interacts with) FBgn0011656	physical_interaction
290037	interacts with	FBgn0003944 (interacts with) FBgn0003044	true	interacts with	FBgn0003944 (interacts with) FBgn0003044	genetic_interaction
290038	interacts with	FBgn0003944 (interacts with) FBgn0003731	true	interacts with	FBgn0003944 (interacts with) FBgn0003731	genetic_interaction
290039	interacts with	FBgn0000719 (interacts with) FBgn0260660	true	interacts with	FBgn0000719 (interacts with) FBgn0260660	physical_interaction
290040	interacts with	FBgn0000719 (interacts with) FBgn0038784	true	interacts with	FBgn0000719 (interacts with) FBgn0038784	physical_interaction
290041	interacts with	FBgn0000719 (interacts with) FBgn0025674	true	interacts with	FBgn0000719 (interacts with) FBgn0025674	physical_interaction
290042	interacts with	FBgn0000719 (interacts with) FBgn0011582	true	interacts with	FBgn0000719 (interacts with) FBgn0011582	physical_interaction
290043	interacts with	FBgn0003731 (interacts with) FBgn0040068	true	interacts with	FBgn0003731 (interacts with) FBgn0040068	physical_interaction
290044	interacts with	FBgn0003731 (interacts with) FBgn0284408	true	interacts with	FBgn0003731 (interacts with) FBgn0284408	genetic_interaction
290045	interacts with	FBgn0003731 (interacts with) FBgn0000097	true	interacts with	FBgn0003731 (interacts with) FBgn0000097	genetic_interaction
290046	interacts with	FBgn0003731 (interacts with) FBgn0000547	true	interacts with	FBgn0003731 (interacts with) FBgn0000547	genetic_interaction
290047	interacts with	FBgn0003731 (interacts with) FBgn0259176	true	interacts with	FBgn0003731 (interacts with) FBgn0259176	genetic_interaction
290048	interacts with	FBgn0003731 (interacts with) FBgn0013469	true	interacts with	FBgn0003731 (interacts with) FBgn0013469	genetic_interaction
290049	interacts with	FBgn0003463 (interacts with) FBgn0031016	true	interacts with	FBgn0003463 (interacts with) FBgn0031016	genetic_interaction
290050	interacts with	FBgn0000547 (interacts with) FBgn0051774	true	interacts with	FBgn0000547 (interacts with) FBgn0051774	physical_interaction
290051	interacts with	FBgn0000547 (interacts with) FBgn0029830	true	interacts with	FBgn0000547 (interacts with) FBgn0029830	physical_interaction
290052	interacts with	FBgn0000547 (interacts with) FBgn0010473	true	interacts with	FBgn0000547 (interacts with) FBgn0010473	physical_interaction
290053	interacts with	FBgn0003896 (interacts with) FBgn0003944	true	interacts with	FBgn0003896 (interacts with) FBgn0003944	physical_interaction

## Sheet: Supplementary File 2e
Statistics of Transcription factors RNAi cardiac knockdown effects on heart performance traits.
TFs were inactivated in the heart by hand-Gal4 and heart parameters monitored in vivo by tdtk tomato high speed video recording (see methods). Graphic representation of the data are displayed in Figure 3C.
RNAi line	flyID	fly_gene	EDD	significance.x.x.x.x	ESD	significance.y.x.x.x	FS	significance.x.y.x.x	HP_median	significance.y.y.x.x	DI_median	significance.x.x.y.x	SI_median	significance.x.y.y.x	AI	significance.x.y.y.y
110517KK	FBgn0011648	Mad	1	not significant	0.671640111333318	not significant	0.026142465947457	*	8.99286866746067e-07	****	0.00479582092308726	***	2.27760027590449e-05	****	0.000310874050461641	***
604691TrIP	FBgn0013469	klu	6.10242887243392e-09	****	8.04275907114666e-08	****	1	not significant	0.0339853902401274	*	1	not significant	0.00319657844798167	***	1	not significant
101925KK	FBgn0283521	lola	2.22348895693673e-05	****	0.0247157000891477	*	0.000930556583945851	***	2.35772089632325e-13	****	7.08731447721399e-10	****	1.09228024226051e-17	****	2.06172961703423e-09	****
102196KK	FBgn0040765	luna	0.0127206535246195	*	0.528040675372447	not significant	0.0229713796690817	*	0.0374957484088011	*	0.743205678324778	not significant	0.0354459734893475	*	1	not significant
109521KK	FBgn0003507	srp	0.000454350246177482	***	0.0062989435411864	**	1	not significant	7.28160349277056e-09	****	0.000337998651966965	***	2.2133731166401e-07	****	0.345952614073517	not significant
50134GD	FBgn0014343	mirr	0.146054246217374	not significant	0.0456904121949785	*	0.733373622850541	not significant	0.544745597929472	not significant	0.526443547992959	not significant	0.0404150234341659	*	0.236378047318502	not significant
30564GD	FBgn0011276	HlH3B	0.955851995468044	not significant	0.836771095659076	not significant	0.0133706273371465	*	6.30311593040065e-16	****	2.89520093084032e-12	****	5.33427321603747e-11	****	0.11658771283925	not significant
