# Supplementary material for: Genetic architecture of natural variation of cardiac performance from flies to humans
Source: eLife. 2022 Nov 16;11:e82459. doi: 10.7554/eLife.82459 (PMC9668334; doi:10.7554/eLife.82459)
Supplement: Supplementary file 3. — (a) Summary table of genes associated with cardiac traits CVe, computing data from Fast LMM (single marker GWA), and FastEpistasis (Epistasis GWA). Raw data are provided in Figure 4—source data 1. Fly Base gene numbers (FBgn), gene symbol, and method from which the associated gene was identified are indicated. Corresponding quantitative traits and Gene Ontology (molecular function) annotations are provided. The genes found in both single marker and epistasis GWA are labeled in red. (b) List of the 92 genes found associated with both mean and CVe of cardiac performance traits. (c) Lists of all variants associated with CVe and mean identified by FastLMM and FastEpistasis and overlap between both lists. (d) Functional enrichment analysis performed on the 566 genes from FastLMM and FastEpistasis analyses, all CVe traits merged (a), using g:GOSt from G profiler. Parameters used were as follows: Background: all annotated genes/selected GO terms size >5 and <500. (e) Enrichment analysis (hypergeometric distribution calculations) for genes identified in a global RNAi screen for heart function (Neely et al., 2010). (f) Human genes found associated with coronary artery diseases (CAD) in genome-wide associations studies (GWAS). Human gene ID, SNP ID (when available), and original article describing the association are indicated. (g) Drosophila orthologues of human CAD genes identified using DIOPT. (h) Human genes found associated with cardiac traits in GWAS. Human gene ID, SNP ID (when available), quantitative trait analyzed for association, and original article describing the association are indicated. (i) Drosophila orthologues of human cardiac traits genes identified using DIOPT. [file elife-82459-supp3.xlsx]

## Sheet: Supplementary File 3a
Summary of all GWAS associated genes (traits Cve)
Summary table of genes associated to cardiac traits CVe, computing data from Fast LMM (single marker GWA) and Fast -Epistasis (Epistasis GWA). Fly Base gene numbers (FBgn), gene symbol and method from which the associated gene was identified are indicated. Corresponding quantitative traits and Gene Ontology (Molecular function) annotations are provided. The genes found in both single marker and e…
FBgn	GeneSymbol	method	CVe AI	CVe SI	CVe HP	CVe DI	CVe DD	CVe SD	CVe FS		GO_MOLECULAR_FUNCTION
FBgn0034049	bdg	FastEpistasis	0	0	0	0	1	0	0		neurotransmitter:sodium symporter activity ; GO:0005328 | inferred from electronic annotation with InterPro:IPR000175 <newline> neurotransmitter:sodium symporter activity ; GO:0005328 | inferred from sequence model <newline> neurotransmitter transmembrane transporter activity ; GO:0005326 | inferred from sequence or structural similarity with DAT
FBgn0053179	beat-IIIb	FastEpistasis	0	0	0	0	1	0	0		molecular_function ; GO:0003674 | no biological data available
FBgn0035844	CG13676	FastEpistasis	0	0	0	0	1	0	0		chitin binding ; GO:0008061 | inferred from electronic annotation with InterPro:IPR002557
FBgn0035583	CG13704	FastEpistasis	0	0	0	0	1	0	0		-
FBgn0038148	CG14377	FastEpistasis	0	0	0	0	1	0	0		molecular_function ; GO:0003674 | no biological data available
FBgn0030137	CG15317	FastEpistasis	0	0	0	0	1	0	0		molecular_function ; GO:0003674 | no biological data available
FBgn0038606	CG15803	FastEpistasis	0	0	0	0	1	0	0		protein C-terminus binding ; GO:0008022 | inferred from sequence or structural similarity with HGNC:7208
FBgn0033443	CG1698	FastEpistasis	0	0	0	0	1	0	0		amino acid:cation symporter activity ; GO:0005416 | inferred from sequence model <newline> L-amino acid transmembrane transporter activity ; GO:0015179 | inferred from biological aspect of ancestor with PANTHER:PTN002267127 <newline> neurotransmitter:sodium symporter activity ; GO:0005328 | inferred from electronic annotation with InterPro:IPR000175 <newline> neurotransmitter transmembrane transp…
FBgn0051161	CG31161	FastEpistasis	0	0	0	0	1	0	0		molecular_function ; GO:0003674 | no biological data available
FBgn0051690	CG31690	FastEpistasis	0	0	0	0	1	0	0		mannosyltransferase activity ; GO:0000030 | inferred from sequence or structural similarity with UniProtKB:Q8IUR5
FBgn0052365	CG32365	FastEpistasis	0	0	0	0	1	0	0		-
FBgn0052982	CG32982	FastEpistasis	0	0	0	0	1	0	0		-
FBgn0085422	CG34393	FastEpistasis	0	0	0	0	1	0	0		Ras guanyl-nucleotide exchange factor activity ; GO:0005088 | inferred from sequence or structural similarity with HGNC:24246
FBgn0264502	CG43901	FastEpistasis	0	0	0	0	1	0	0		molecular_function ; GO:0003674 | no biological data available
FBgn0039339	CG5116	FastEpistasis	0	0	0	0	1	0	0		GTP binding ; GO:0005525 | inferred from electronic annotation with InterPro:IPR006073, InterPro:IPR016496, InterPro:IPR030394 <newline> ribosome binding ; GO:0043022 | inferred from biological aspect of ancestor with PANTHER:PTN000027640
FBgn0039464	CG6330	FastEpistasis	0	0	0	0	1	0	0		uridine phosphorylase activity ; GO:0004850 | inferred from electronic annotation with InterPro:IPR010059
FBgn0026533	Dek	FastEpistasis	0	0	0	0	1	0	0		histone binding ; GO:0042393 | inferred from biological aspect of ancestor with PANTHER:PTN000336336
FBgn0085420	DIP-delta	FastEpistasis	0	0	0	0	1	0	0		-
FBgn0085414	dpr12	FastEpistasis	0	0	0	0	1	0	0		molecular_function ; GO:0003674 | no biological data available
FBgn0034286	dpr13	FastEpistasis	0	0	0	0	1	0	0		molecular_function ; GO:0003674 | no biological data available
FBgn0261871	dpr2	FastEpistasis	0	0	0	0	1	0	0		molecular_function ; GO:0003674 | no biological data available
FBgn0033159	Dscam1	FastEpistasis	0	0	0	0	1	0	0		identical protein binding ; GO:0042802 | inferred from physical interaction with Dscam1 <newline> antigen binding ; GO:0003823 | inferred from direct assay <newline> cell-cell adhesion mediator activity ; GO:0098632 | inferred from biological aspect of ancestor with PANTHER:PTN001296633 <newline> protein homodimerization activity ; GO:0042803 | inferred from physical interaction with Dscam1 <newl…
FBgn0038755	Hs6st	FastEpistasis	0	0	0	0	1	0	0		heparan sulfate 6-O-sulfotransferase activity ; GO:0017095 | inferred from biological aspect of ancestor with PANTHER:PTN000301790
FBgn0019968	Khc-73	FastEpistasis	0	0	0	0	1	0	0		ATP binding ; GO:0005524 | inferred from electronic annotation with InterPro:IPR001752, InterPro:IPR019821 <newline> microtubule motor activity ; GO:0003777 | inferred from biological aspect of ancestor with PANTHER:PTN000648413 <newline> protein homodimerization activity ; GO:0042803 | inferred from direct assay <newline> microtubule motor activity ; GO:0003777 | inferred from direct assay <newl…
FBgn0015721	ktub	FastEpistasis	0	0	0	0	1	0	0		-
FBgn0030274	Lint-1	FastEpistasis	0	0	0	0	1	0	0		-
FBgn0050009	lncRNA:CR30009	FastEpistasis	0	0	0	0	1	0	0		-
FBgn0264349	lncRNA:CR43805	FastEpistasis	0	0	0	0	1	0	0		-
FBgn0265104	lncRNA:CR44206	FastEpistasis	0	0	0	0	1	0	0		molecular_function ; GO:0003674 | no biological data available
FBgn0264857	lncRNA:iab8	FastEpistasis	0	0	0	0	1	0	0		molecular_function ; GO:0003674 | no biological data available
FBgn0265487	mbl	FastEpistasis	0	0	0	0	1	0	0		nucleic acid binding ; GO:0003676 | non-traceable author statement <newline> RNA binding ; GO:0003723 | inferred from biological aspect of ancestor with PANTHER:PTN001398042 <newline> metal ion binding ; GO:0046872 | inferred from electronic annotation with InterPro:IPR000571
FBgn0038584	mTerf5	FastEpistasis	0	0	0	0	1	0	0		double-stranded DNA binding ; GO:0003690 | inferred from electronic annotation with InterPro:IPR003690 <newline> nucleic acid binding ; GO:0003676 | inferred from biological aspect of ancestor with PANTHER:PTN001035337
FBgn0036848	Naxd	FastEpistasis	0	0	0	0	1	0	0		ATP-dependent NAD(P)H-hydrate dehydratase activity ; GO:0047453 | inferred from biological aspect of ancestor with PANTHER:PTN000287549 <newline> ADP-dependent NAD(P)H-hydrate dehydratase activity ; GO:0052855 | inferred from electronic annotation with InterPro:IPR000631
FBgn0003090	pk	FastEpistasis	0	0	0	0	1	0	0		zinc ion binding ; GO:0008270 | inferred from electronic annotation with InterPro:IPR001781, InterPro:IPR010442 <newline> protein binding ; GO:0005515 | inferred from physical interaction with UniProtKB:P51140 <newline> protein binding ; GO:0005515 | inferred from physical interaction with UniProtKB:A1Z7N9
FBgn0262614	pyd	FastEpistasis	0	0	0	0	1	0	0		cell adhesion molecule binding ; GO:0050839 | inferred from physical interaction with kirre
FBgn0026376	Rgl	FastEpistasis	0	0	0	0	1	0	0		Ral guanyl-nucleotide exchange factor activity ; GO:0008321 | inferred from genetic interaction with Rala <newline> Ras GTPase binding ; GO:0017016 | inferred from physical interaction with Ras85D, Ras64B, Rap1
FBgn0051660	smog	FastEpistasis	0	0	0	0	1	0	0		G protein-coupled receptor activity ; GO:0004930 | inferred from sequence or structural similarity with mGluR
FBgn0036899	tey	FastEpistasis	0	0	0	0	1	0	0		-
FBgn0004117	Tm2	FastEpistasis	0	0	0	0	1	0	0		actin filament binding ; GO:0051015 | inferred from biological aspect of ancestor with PANTHER:PTN000443979
FBgn0033636	tou	FastEpistasis	0	0	0	0	1	0	0		DNA binding ; GO:0003677 | inferred from electronic annotation with InterPro:IPR001739, InterPro:IPR016177 <newline> transcription factor binding ; GO:0008134 | inferred from physical interaction with pnr <newline> protein binding ; GO:0005515 | inferred from physical interaction with Iswi inferred from physical interaction with Chi
FBgn0264442	ab	FastEpistasis	0	0	0	0	0	1	0		nucleic acid binding ; GO:0003676 | inferred from electronic annotation with InterPro:IPR013087 <newline> DNA-binding transcription factor activity ; GO:0003700 | non-traceable author statement
FBgn0035244	ABCB7	FastEpistasis	0	0	0	0	0	1	0		ATP binding ; GO:0005524 | inferred from electronic annotation with InterPro:IPR003439, InterPro:IPR011527, InterPro:IPR017871 <newline> heme transporter activity ; GO:0015232 | inferred from sequence or structural similarity with UniProtKB:O75027 <newline> ATPase-coupled transmembrane transporter activity ; GO:0042626 | inferred from sequence or structural similarity with UniProtKB:O75027 <newli…
FBgn0024150	Ac78C	FastEpistasis	0	0	0	0	0	1	0		adenylate cyclase activity ; GO:0004016 | inferred from biological aspect of ancestor with PANTHER:PTN002899368 <newline> adenylate cyclase activity ; GO:0004016 | inferred from direct assay
FBgn0030421	Agpat1	FastEpistasis	0	0	0	0	0	1	0		1-acylglycerol-3-phosphate O-acyltransferase activity ; GO:0003841 | inferred from biological aspect of ancestor with PANTHER:PTN000046632
FBgn0038742	Arc42	FastEpistasis	0	0	0	0	0	1	0		acyl-CoA dehydrogenase activity ; GO:0003995 | inferred from electronic annotation with InterPro:IPR006089, InterPro:IPR006091 <newline> flavin adenine dinucleotide binding ; GO:0050660 | inferred from electronic annotation with InterPro:IPR013786 <newline> butyryl-CoA dehydrogenase activity ; GO:0004085 | inferred from biological aspect of ancestor with PANTHER:PTN000097838
FBgn0262475	bru2	FastEpistasis	0	0	0	0	0	1	0		mRNA binding ; GO:0003729 | inferred from biological aspect of ancestor with PANTHER:PTN000609546 <newline> RNA binding ; GO:0003723 | inferred from biological aspect of ancestor with PANTHER:PTN002768817 <newline> RNA binding ; GO:0003723 | inferred from sequence alignment with bru1
FBgn0038163	CG10841	FastEpistasis	0	0	0	0	0	1	0		calcium ion binding ; GO:0005509 | inferred from electronic annotation with InterPro:IPR002048
FBgn0031835	CG11319	FastEpistasis	0	0	0	0	0	1	0		serine-type peptidase activity ; GO:0008236 | inferred from electronic annotation with InterPro:IPR001375
FBgn0038532	CG14322	FastEpistasis	0	0	0	0	0	1	0		ubiquitin binding ; GO:0043130 | inferred from sequence or structural similarity with SGD:S000001308
FBgn0031606	CG15439	FastEpistasis	0	0	0	0	0	1	0		-
FBgn0051176	CG31176	FastEpistasis	0	0	0	0	0	1	0		-
FBgn0052333	CG32333	FastEpistasis	0	0	0	0	0	1	0		-
FBgn0053125	CG33125	FastEpistasis	0	0	0	0	0	1	0		molecular_function ; GO:0003674 | no biological data available
FBgn0261262	CG42613	FastEpistasis	0	0	0	0	0	1	0		molecular_function ; GO:0003674 | no biological data available
FBgn0033874	CG6347	FastEpistasis	0	0	0	0	0	1	0		cysteine-type endopeptidase activity ; GO:0004197 | inferred from biological aspect of ancestor with PANTHER:PTN000274640
FBgn0032305	CG6700	FastEpistasis	0	0	0	0	0	1	0		-
FBgn0035315	CG8960	FastEpistasis	0	0	0	0	0	1	0		-
FBgn0020306	dom	FastEpistasis	0	0	0	0	0	1	0		ATPase activity ; GO:0016887 | inferred from biological aspect of ancestor with PANTHER:PTN002904112 <newline> ATP binding ; GO:0005524 | inferred from electronic annotation with InterPro:IPR000330 <newline> histone binding ; GO:0042393 | inferred from biological aspect of ancestor with PANTHER:PTN002904112 <newline> DNA-dependent ATPase activity ; GO:0008094 | inferred from sequence or structura…
FBgn0085369	Drgx	FastEpistasis	0	0	0	0	0	1	0		DNA-binding transcription factor activity, RNA polymerase II-specific ; GO:0000981 | inferred from biological aspect of ancestor with PANTHER:PTN002518769 <newline> RNA polymerase II regulatory region sequence-specific DNA binding ; GO:0000977 | inferred from biological aspect of ancestor with PANTHER:PTN002518769
FBgn0005640	Eip63E	FastEpistasis	0	0	0	0	0	1	0		ATP binding ; GO:0005524 | inferred from electronic annotation with InterPro:IPR000719, InterPro:IPR002290, InterPro:IPR017441 <newline> heme binding ; GO:0020037 | inferred from electronic annotation with InterPro:IPR018506 <newline> cyclin-dependent protein serine/threonine kinase activity ; GO:0004693 | inferred from direct assay <newline> cyclin-dependent protein serine/threonine kinase activ…
FBgn0031414	eys	FastEpistasis	0	0	0	0	0	1	0		calcium ion binding ; GO:0005509 | inferred from electronic annotation with InterPro:IPR001881, InterPro:IPR018097 <newline> protein binding ; GO:0005515 | inferred from physical interaction with UniProtKB:O97148 <newline> extracellular matrix structural constituent ; GO:0005201 | inferred from mutant phenotype
FBgn0004509	Fur1	FastEpistasis	0	0	0	0	0	1	0		serine-type endopeptidase activity ; GO:0004252 | inferred from biological aspect of ancestor with PANTHER:PTN002451026 <newline> serine-type endopeptidase activity ; GO:0004252 | inferred from genetic interaction with Fur2 <newline> serine-type endopeptidase activity ; GO:0004252 | inferred from direct assay
FBgn0260446	GABA-B-R1	FastEpistasis	0	0	0	0	0	1	0		G protein-coupled GABA receptor activity ; GO:0004965 | inferred from sequence or structural similarity <newline> G protein-coupled GABA receptor activity ; GO:0004965 | inferred from biological aspect of ancestor with PANTHER:PTN000054983 <newline> transmembrane signaling receptor activity ; GO:0004888 | inferred from biological aspect of ancestor with PANTHER:PTN000828857 <newline> G protein-co…
FBgn0001256	ImpL1	FastEpistasis	0	0	0	0	0	1	0		-
FBgn0004379	Klp67A	FastEpistasis	0	0	0	0	0	1	0		microtubule binding ; GO:0008017 | inferred from biological aspect of ancestor with PANTHER:PTN000648413 <newline> ATP binding ; GO:0005524 | inferred from electronic annotation with InterPro:IPR001752 <newline> motor activity ; GO:0003774 | inferred from sequence or structural similarity inferred from direct assay <newline> ATP-dependent microtubule motor activity, plus-end-directed ; GO:0008574…
FBgn0032067	LManIV	FastEpistasis	0	0	0	0	0	1	0		carbohydrate binding ; GO:0030246 | inferred from electronic annotation with InterPro:IPR011013 <newline> alpha-mannosidase activity ; GO:0004559 | inferred from biological aspect of ancestor with PANTHER:PTN002480870
FBgn0263613	lncRNA:CR43622	FastEpistasis	0	0	0	0	0	1	0		-
FBgn0042185	MCU	FastEpistasis	0	0	0	0	0	1	0		uniporter activity ; GO:0015292 | inferred from biological aspect of ancestor with PANTHER:PTN000335993 <newline> calcium channel activity ; GO:0005262 | inferred from sequence or structural similarity with UniProtKB:Q8NE86 <newline> calcium channel activity ; GO:0005262 | inferred from biological aspect of ancestor with PANTHER:PTN000335993 <newline> uniporter activity ; GO:0015292 | inferred fr…
FBgn0014343	mirr	FastEpistasis	0	0	0	0	0	1	0		sequence-specific DNA binding ; GO:0043565 | inferred from electronic annotation with InterPro:IPR017970 <newline> DNA-binding transcription factor activity, RNA polymerase II-specific ; GO:0000981 | inferred from biological aspect of ancestor with PANTHER:PTN002257217 <newline> DNA-binding transcription factor activity, RNA polymerase II-specific ; GO:0000981 | inferred from sequence or structur…
FBgn0011676	Nos	FastEpistasis	0	0	0	0	0	1	0		calmodulin binding ; GO:0005516 | non-traceable author statement <newline> NADP binding ; GO:0050661 | inferred from electronic annotation with InterPro:IPR012144 <newline> heme binding ; GO:0020037 | inferred from electronic annotation with InterPro:IPR012144 <newline> calmodulin binding ; GO:0005516 | inferred from electronic annotation with InterPro:IPR012144 <newline> heme binding ; GO:002003…
FBgn0010403	Obp83b	FastEpistasis	0	0	0	0	0	1	0		odorant binding ; GO:0005549 | inferred from sequence alignment with UniProtKB:P34174 <newline> odorant binding ; GO:0005549 | inferred from sequence or structural similarity with lush
FBgn0038653	Octalpha2R	FastEpistasis	0	0	0	0	0	1	0		heterotrimeric G-protein binding ; GO:0032795 | inferred from sequence or structural similarity with HGNC:281 <newline> G protein-coupled amine receptor activity ; GO:0008227 | inferred from biological aspect of ancestor with PANTHER:PTN002798402 <newline> octopamine receptor activity ; GO:0004989 | inferred from direct assay <newline> G protein-coupled receptor activity ; GO:0004930 | inferred f…
FBgn0004394	pdm2	FastEpistasis	0	0	0	0	0	1	0		DNA binding ; GO:0003677 | inferred from mutant phenotype <newline> sequence-specific DNA binding ; GO:0043565 | inferred from electronic annotation with InterPro:IPR017970 <newline> DNA-binding transcription activator activity, RNA polymerase II-specific ; GO:0001228 | inferred from biological aspect of ancestor with PANTHER:PTN000180816 <newline> DNA-binding transcription activator activity, RN…
FBgn0031745	rau	FastEpistasis	0	0	0	0	0	1	0		Ras GTPase binding ; GO:0017016 | inferred from physical interaction with Ras85D <newline> protein homodimerization activity ; GO:0042803 | inferred from direct assay <newline> Ras GTPase binding ; GO:0017016 | inferred from biological aspect of ancestor with PANTHER:PTN001083850
FBgn0266491	SclA	FastEpistasis	0	0	0	0	0	1	0		-
FBgn0002573	sens	FastEpistasis	0	0	0	0	0	1	0		bHLH transcription factor binding ; GO:0043425 | inferred from direct assay <newline> sequence-specific DNA binding ; GO:0043565 | inferred from direct assay <newline> DNA-binding transcription factor activity, RNA polymerase II-specific ; GO:0000981 | inferred from direct assay <newline> DNA-binding transcription activator activity, RNA polymerase II-specific ; GO:0001228 | contributes_to inferr…
FBgn0034903	sona	FastEpistasis	0	0	0	0	0	1	0		metalloendopeptidase activity ; GO:0004222 | inferred from direct assay
FBgn0033876	Syngr	FastEpistasis	0	0	0	0	0	1	0		-
FBgn0014073	Tie	FastEpistasis	0	0	0	0	0	1	0		ATP binding ; GO:0005524 | inferred from electronic annotation with InterPro:IPR000719, InterPro:IPR017441 <newline> transmembrane receptor protein tyrosine kinase activity ; GO:0004714 | inferred from biological aspect of ancestor with PANTHER:PTN002356460
FBgn0040508	ACXC	FastEpistasis	0	0	0	0	0	0	1		adenylate cyclase activity ; GO:0004016 | inferred from biological aspect of ancestor with PANTHER:PTN002899368 <newline> adenylate cyclase activity ; GO:0004016 | inferred from sequence model
FBgn0039584	beat-VI	FastEpistasis	0	0	0	0	0	0	1		molecular_function ; GO:0003674 | no biological data available
FBgn0259176	bun	FastEpistasis	0	0	0	0	0	0	1		DNA-binding transcription factor activity ; GO:0003700 | inferred from electronic annotation with InterPro:IPR000580 <newline> protein homodimerization activity ; GO:0042803 | inferred from sequence or structural similarity
FBgn0040233	cana	FastEpistasis	0	0	0	0	0	0	1		microtubule binding ; GO:0008017 | inferred from biological aspect of ancestor with PANTHER:PTN000648413 <newline> ATP binding ; GO:0005524 | inferred from electronic annotation with InterPro:IPR001752, InterPro:IPR019821 <newline> ATP-dependent microtubule motor activity, plus-end-directed ; GO:0008574 | inferred from sequence or structural similarity with HGNC:1856 <newline> ATPase activity ; G…
FBgn0028509	CenG1A	FastEpistasis	0	0	0	0	0	0	1		GTPase activator activity ; GO:0005096 | inferred from mutant phenotype <newline> GTPase activity ; GO:0003924 | inferred from direct assay <newline> GTP binding ; GO:0005525 | inferred from electronic annotation with InterPro:IPR001806 <newline> GTPase activator activity ; GO:0005096 | inferred from sequence model
FBgn0039161	CG13606	FastEpistasis	0	0	0	0	0	0	1		-
FBgn0039407	CG14544	FastEpistasis	0	0	0	0	0	0	1		tRNA (adenine-N1-)-methyltransferase activity ; GO:0016429 | inferred from electronic annotation with InterPro:IPR014816
FBgn0041004	CG17715	FastEpistasis	0	0	0	0	0	0	1		-
FBgn0000633	CG17716	FastEpistasis	0	0	0	0	0	0	1		-
FBgn0052024	CG32024	FastEpistasis	0	0	0	0	0	0	1		chitin binding ; GO:0008061 | inferred from electronic annotation with InterPro:IPR002557
FBgn0083960	CG34124	FastEpistasis	0	0	0	0	0	0	1		molecular_function ; GO:0003674 | no biological data available
FBgn0260657	CG42540	FastEpistasis	0	0	0	0	0	0	1		-
FBgn0032010	CG8086	FastEpistasis	0	0	0	0	0	0	1		-
FBgn0285955	cv-c	FastEpistasis	0	0	0	0	0	0	1		lipid binding ; GO:0008289 | inferred from electronic annotation with InterPro:IPR002913 <newline> GTPase activator activity ; GO:0005096 | inferred from biological aspect of ancestor with PANTHER:PTN000974804 <newline> GTPase activator activity ; GO:0005096 | inferred from mutant phenotype <newline> GTPase activator activity ; GO:0005096 | inferred from genetic interaction with Rac1, Rac2, Rho1
FBgn0001112	Gld	FastEpistasis	0	0	0	0	0	0	1		flavin adenine dinucleotide binding ; GO:0050660 | inferred from electronic annotation with InterPro:IPR000172, InterPro:IPR012132 <newline> oxidoreductase activity, acting on CH-OH group of donors ; GO:0016614 | inferred from electronic annotation with InterPro:IPR000172, InterPro:IPR007867, InterPro:IPR012132
FBgn0013272	Gp150	FastEpistasis	0	0	0	0	0	0	1		-
FBgn0267033	mamo	FastEpistasis	0	0	0	0	0	0	1		chromatin binding ; GO:0003682 | inferred from direct assay <newline> sequence-specific DNA binding ; GO:0043565 | inferred from direct assay
FBgn0032456	MRP	FastEpistasis	0	0	0	0	0	0	1		ATP binding ; GO:0005524 | inferred from electronic annotation with InterPro:IPR003439, InterPro:IPR011527, InterPro:IPR017871 <newline> ATPase-coupled inorganic anion transmembrane transporter activity ; GO:0043225 | inferred from direct assay <newline> ATPase-coupled transmembrane transporter activity ; GO:0042626 | inferred from biological aspect of ancestor with PANTHER:PTN000657997 <newline>…
FBgn0052580	Muc14A	FastEpistasis	0	0	0	0	0	0	1		extracellular matrix structural constituent ; GO:0005201 | inferred from sequence model
FBgn0050418	nord	FastEpistasis	0	0	0	0	0	0	1		molecular_function ; GO:0003674 | no biological data available
FBgn0285944	para	FastEpistasis	0	0	0	0	0	0	1		voltage-gated sodium channel activity ; GO:0005248 | inferred from direct assay <newline> calcium ion binding ; GO:0005509 | inferred from electronic annotation with InterPro:IPR002048 <newline> cation channel activity ; GO:0005261 | inferred from biological aspect of ancestor with PANTHER:PTN000004140 <newline> voltage-gated sodium channel activity ; GO:0005248 | inferred from biological aspect …
FBgn0030400	Pits	FastEpistasis	0	0	0	0	0	0	1		transcription corepressor activity ; GO:0003714 | inferred from biological aspect of ancestor with PANTHER:PTN000775901 <newline> ubiquitin protein ligase activity ; GO:0061630 | inferred from biological aspect of ancestor with PANTHER:PTN000775901
FBgn0005624	Psc	FastEpistasis	0	0	0	0	0	0	1		chromatin binding ; GO:0003682 | inferred from direct assay <newline> DNA binding ; GO:0003677 | inferred from direct assay <newline> promoter-specific chromatin binding ; GO:1990841 | inferred from biological aspect of ancestor with PANTHER:PTN000850589 <newline> sequence-specific DNA binding ; GO:0043565 | inferred from direct assay <newline> zinc ion binding ; GO:0008270 | inferred from sequen…
FBgn0266098	rg	FastEpistasis	0	0	0	0	0	0	1		protein kinase A binding ; GO:0051018 | inferred from direct assay
FBgn0083940	RhoU	FastEpistasis	0	0	0	0	0	0	1		GTPase activity ; GO:0003924 | inferred from sequence or structural similarity with MGI:MGI:1916831 <newline> GTP binding ; GO:0005525 | inferred from biological aspect of ancestor with PANTHER:PTN000632671 <newline> protein kinase binding ; GO:0019901 | inferred from biological aspect of ancestor with PANTHER:PTN001530052 <newline> GTPase activity ; GO:0003924 | inferred from biological aspect o…
FBgn0053547	Rim	FastEpistasis	0	0	0	0	0	0	1		Rab GTPase binding ; GO:0017137 | inferred from biological aspect of ancestor with PANTHER:PTN000952366 <newline> ion channel binding ; GO:0044325 | inferred from biological aspect of ancestor with PANTHER:PTN000952366
FBgn0083981	RunxA	FastEpistasis	0	0	0	0	0	0	1		DNA-binding transcription factor activity ; GO:0003700 | inferred from electronic annotation with InterPro:IPR008967, InterPro:IPR012346, InterPro:IPR013524 <newline> ATP binding ; GO:0005524 | inferred from electronic annotation with InterPro:IPR000040 <newline> DNA binding ; GO:0003677 | inferred from electronic annotation with InterPro:IPR000040, InterPro:IPR012346, InterPro:IPR013524
FBgn0286785	scb	FastEpistasis	0	0	0	0	0	0	1		protein heterodimerization activity ; GO:0046982 | inferred from physical interaction with mys <newline> protein heterodimerization activity ; GO:0046982 | inferred from physical interaction with Itgbn
FBgn0003380	Sh	FastEpistasis	0	0	0	0	0	0	1		voltage-gated cation channel activity ; GO:0022843 | inferred from direct assay <newline> delayed rectifier potassium channel activity ; GO:0005251 | inferred from biological aspect of ancestor with PANTHER:PTN000898862 <newline> voltage-gated potassium channel activity ; GO:0005249 | non-traceable author statement <newline> voltage-gated potassium channel activity ; GO:0005249 | traceable author…
FBgn0003435	sm	FastEpistasis	0	0	0	0	0	0	1		mRNA binding ; GO:0003729 | inferred from biological aspect of ancestor with PANTHER:PTN002574557 <newline> mRNA binding ; GO:0003729 | inferred from sequence or structural similarity
FBgn0014391	sun	FastEpistasis	0	0	0	0	0	0	1		ATPase activity ; GO:0016887 | contributes_to inferred from biological aspect of ancestor with PANTHER:PTN000278562 <newline> protein binding ; GO:0005515 | inferred from physical interaction with UniProtKB:O97148 <newline> G protein-coupled receptor binding ; GO:0001664 | inferred from physical interaction with mth <newline> proton-transporting ATP synthase activity, rotational mechanism ; GO:00…
FBgn0038826	Syp	FastEpistasis	0	0	0	0	0	0	1		RNA binding ; GO:0003723 | inferred from biological aspect of ancestor with PANTHER:PTN002723139 <newline> mRNA binding ; GO:0003729 | inferred from biological aspect of ancestor with PANTHER:PTN002723140 <newline> mRNA binding ; GO:0003729 | inferred from sequence or structural similarity <newline> mRNA binding ; GO:0003729 | inferred from direct assay <newline> RNA binding ; GO:0003723 | inferr…
FBgn0038358	Ttc26	FastEpistasis	0	0	0	0	0	0	1		intraciliary transport particle B binding ; GO:0120170 | inferred from biological aspect of ancestor with PANTHER:PTN000381369
FBgn0042693	wrd	FastEpistasis	0	0	0	0	0	0	1		protein phosphatase regulator activity ; GO:0019888 | non-traceable author statement <newline> protein phosphatase activator activity ; GO:0072542 | inferred from biological aspect of ancestor with PANTHER:PTN002567314
FBgn0031016	kek5	FastEpistasis	0	0	0	0	0	1	1		-
FBgn0031791	AANATL2	FastEpistasis	1	0	0	0	0	0	0		N-acetyltransferase activity ; GO:0008080 | inferred from biological aspect of ancestor with PANTHER:PTN001463139 <newline> acyl-CoA N-acyltransferase activity ; GO:0019186 | inferred from direct assay <newline> aralkylamine N-acetyltransferase activity ; GO:0004059 | inferred from direct assay
FBgn0286071	AdamTS-A	FastEpistasis	1	0	0	0	0	0	0		metalloendopeptidase activity ; GO:0004222 | inferred from electronic annotation with InterPro:IPR001590, InterPro:IPR002870, InterPro:IPR010294, InterPro:IPR012314 <newline> zinc ion binding ; GO:0008270 | inferred from electronic annotation with InterPro:IPR002870, InterPro:IPR012314, InterPro:IPR013273
FBgn0250816	AGO3	FastEpistasis	1	0	0	0	0	0	0		piRNA binding ; GO:0034584 | inferred from direct assay <newline> RNA binding ; GO:0003723 | inferred from direct assay
FBgn0259170	alpha-Man-Ia	FastEpistasis	1	0	0	0	0	0	0		calcium ion binding ; GO:0005509 | inferred from electronic annotation with InterPro:IPR001382 <newline> mannosyl-oligosaccharide 1,2-alpha-mannosidase activity ; GO:0004571 | inferred from direct assay <newline> mannosyl-oligosaccharide 1,2-alpha-mannosidase activity ; GO:0004571 | inferred from biological aspect of ancestor with PANTHER:PTN000201533
FBgn0011746	ana	FastEpistasis	1	0	0	0	0	0	0		-
FBgn0000163	baz	FastEpistasis	1	0	0	0	0	0	0		phosphatidic acid binding ; GO:0070300 | inferred from direct assay <newline> protein binding ; GO:0005515 | inferred from physical interaction with Traf4 <newline> phosphatidylinositol binding ; GO:0035091 | inferred from direct assay <newline> phosphatidylinositol binding ; GO:0035091 | inferred from biological aspect of ancestor with PANTHER:PTN001046835
FBgn0029962	CARPA	FastEpistasis	1	0	0	0	0	0	0		zinc ion binding ; GO:0008270 | inferred from electronic annotation with InterPro:IPR023561 <newline> carbonate dehydratase activity ; GO:0004089 | inferred from electronic annotation with InterPro:IPR023561 <newline> hydro-lyase activity ; GO:0016836 | inferred from biological aspect of ancestor with PANTHER:PTN001825752
FBgn0033954	CG12860	FastEpistasis	1	0	0	0	0	0	0		-
FBgn0031955	CG14535	FastEpistasis	1	0	0	0	0	0	0		ATP binding ; GO:0005524 | inferred from electronic annotation with InterPro:IPR001752 <newline> ATPase activity ; GO:0016887 | NOT inferred from sequence or structural similarity with MGI:MGI:2447072 <newline> microtubule motor activity ; GO:0003777 | NOT inferred from sequence or structural similarity with MGI:MGI:2447072 <newline> ATP-dependent microtubule motor activity, plus-end-directed ; G…
FBgn0035508	CG15005	FastEpistasis	1	0	0	0	0	0	0		-
FBgn0030261	CG15203	FastEpistasis	1	0	0	0	0	0	0		-
FBgn0050015	CG30015	FastEpistasis	1	0	0	0	0	0	0		-
FBgn0051323	CG31323	FastEpistasis	1	0	0	0	0	0	0		-
FBgn0054038	CG34038	FastEpistasis	1	0	0	0	0	0	0		molecular_function ; GO:0003674 | no biological data available
FBgn0261584	CG42694	FastEpistasis	1	0	0	0	0	0	0		serine-type endopeptidase activity ; GO:0004252 | NOT inferred from key residues <newline> molecular_function ; GO:0003674 | no biological data available
FBgn0265046	CG44163	FastEpistasis	1	0	0	0	0	0	0		molecular_function ; GO:0003674 | no biological data available
FBgn0032229	CG5045	FastEpistasis	1	0	0	0	0	0	0		ATPase binding ; GO:0051117 | inferred from biological aspect of ancestor with PANTHER:PTN000043558 <newline> ATP-dependent peptidase activity ; GO:0004176 | inferred from biological aspect of ancestor with PANTHER:PTN000043558 <newline> serine-type endopeptidase activity ; GO:0004252 | inferred from mutant phenotype <newline> serine-type endopeptidase activity ; GO:0004252 | inferred from biolog…
FBgn0038136	CG8774	FastEpistasis	1	0	0	0	0	0	0		zinc ion binding ; GO:0008270 | inferred from biological aspect of ancestor with PANTHER:PTN000164250 <newline> peptide binding ; GO:0042277 | inferred from biological aspect of ancestor with PANTHER:PTN000164250 <newline> metalloaminopeptidase activity ; GO:0070006 | inferred from biological aspect of ancestor with PANTHER:PTN000164250
FBgn0024698	Cpsf160	FastEpistasis	1	0	0	0	0	0	0		myosin binding ; GO:0017022 | inferred from physical interaction with Myo10A <newline> mRNA 3'-UTR binding ; GO:0003730 | inferred from sequence or structural similarity with UniProtKB:Q10570
FBgn0267793	CR45232	FastEpistasis	1	0	0	0	0	0	0		molecular_function ; GO:0003674 | no biological data available
FBgn0030339	Cyp28c1	FastEpistasis	1	0	0	0	0	0	0		oxidoreductase activity, acting on paired donors, with incorporation or reduction of molecular oxygen ; GO:0016705 | inferred from electronic annotation with InterPro:IPR001128, InterPro:IPR002401, InterPro:IPR017972 <newline> heme binding ; GO:0020037 | inferred from electronic annotation with InterPro:IPR001128, InterPro:IPR002401 <newline> iron ion binding ; GO:0005506 | inferred from electron…
FBgn0264490	Eip93F	FastEpistasis	1	0	0	0	0	0	0		DNA binding ; GO:0003677 | inferred from electronic annotation with InterPro:IPR007889, InterPro:IPR009057
FBgn0005427	ewg	FastEpistasis	1	0	0	0	0	0	0		core promoter sequence-specific DNA binding ; GO:0001046 | inferred from biological aspect of ancestor with PANTHER:PTN001838773 <newline> RNA polymerase II cis-regulatory region sequence-specific DNA binding ; GO:0000978 | inferred from biological aspect of ancestor with PANTHER:PTN001838773 <newline> DNA-binding transcription factor activity ; GO:0003700 | inferred from electronic annotation wi…
FBgn0266084	Fhos	FastEpistasis	1	0	0	0	0	0	0		actin filament binding ; GO:0051015 | inferred from biological aspect of ancestor with PANTHER:PTN002509352
FBgn0031627	fipi	FastEpistasis	1	0	0	0	0	0	0		-
FBgn0264574	Glut1	FastEpistasis	1	0	0	0	0	0	0		transmembrane transporter activity ; GO:0022857 | inferred from electronic annotation with InterPro:IPR003663, InterPro:IPR005828
FBgn0045478	Gr64b	FastEpistasis	1	0	0	0	0	0	0		sweet taste receptor activity ; GO:0033041 | inferred from biological aspect of ancestor with PANTHER:PTN000484226 <newline> sweet taste receptor activity ; GO:0033041 | inferred from mutant phenotype <newline> taste receptor activity ; GO:0008527 | non-traceable author statement
FBgn0264562	Hr4	FastEpistasis	1	0	0	0	0	0	0		nuclear receptor activity ; GO:0004879 | inferred from mutant phenotype <newline> steroid hormone receptor activity ; GO:0003707 | inferred from electronic annotation with InterPro:IPR001723 <newline> zinc ion binding ; GO:0008270 | inferred from electronic annotation with InterPro:IPR001628, InterPro:IPR013088 <newline> nuclear receptor activity ; GO:0004879 | inferred from biological aspect of …
FBgn0015513	mbc	FastEpistasis	1	0	0	0	0	0	0		protein binding ; GO:0005515 | inferred from physical interaction with rols <newline> Rac guanyl-nucleotide exchange factor activity ; GO:0030676 | inferred from genetic interaction with Rac1
FBgn0020272	mst	FastEpistasis	1	0	0	0	0	0	0		-
FBgn0265988	mv	FastEpistasis	1	0	0	0	0	0	0		-
FBgn0037153	olf413	FastEpistasis	1	0	0	0	0	0	0		oxidoreductase activity, acting on paired donors, with incorporation or reduction of molecular oxygen, reduced ascorbate as one donor, and incorporation of one atom of oxygen ; GO:0016715 | inferred from biological aspect of ancestor with PANTHER:PTN001605435 <newline> copper ion binding ; GO:0005507 | inferred from biological aspect of ancestor with PANTHER:PTN001605435 <newline> dopamine beta-m…
FBgn0037685	Or85f	FastEpistasis	1	0	0	0	0	0	0		odorant binding ; GO:0005549 | inferred from sequence or structural similarity with Or43b <newline> olfactory receptor activity ; GO:0004984 | inferred from biological aspect of ancestor with PANTHER:PTN000474402 <newline> olfactory receptor activity ; GO:0004984 | inferred from high throughput direct assay
FBgn0003009	ord	FastEpistasis	1	0	0	0	0	0	0		protein binding ; GO:0005515 | inferred from physical interaction with UniProtKB:Q9VB08
FBgn0035802	Pura	FastEpistasis	1	0	0	0	0	0	0		Rho guanyl-nucleotide exchange factor activity ; GO:0005089 | inferred from sequence or structural similarity with RhoGEF4
FBgn0011260	Sema2a	FastEpistasis	1	0	0	0	0	0	0		protein binding ; GO:0005515 | inferred from physical interaction with UniProtKB:Q9V4A7 <newline> semaphorin receptor binding ; GO:0030215 | inferred from biological aspect of ancestor with PANTHER:PTN000112368 <newline> chemorepellent activity ; GO:0045499 | inferred from biological aspect of ancestor with PANTHER:PTN000867340
FBgn0029763	Usp16-45	FastEpistasis	1	0	0	0	0	0	0		cysteine-type endopeptidase activity ; GO:0004197 | inferred from biological aspect of ancestor with PANTHER:PTN002541993 <newline> zinc ion binding ; GO:0008270 | inferred from electronic annotation with InterPro:IPR001607 <newline> thiol-dependent ubiquitin-specific protease activity ; GO:0004843 | inferred from biological aspect of ancestor with PANTHER:PTN002541993 <newline> thiol-dependent u…
FBgn0038412	Zip89B	FastEpistasis	1	0	0	0	0	0	0		zinc ion transmembrane transporter activity ; GO:0005385 | inferred by curator from GO:0016324 <newline> zinc ion transmembrane transporter activity ; GO:0005385 | inferred from biological aspect of ancestor with PANTHER:PTN000115815
FBgn0032006	Pvr	FastEpistasis	1	0	0	0	1	0	0		ATP binding ; GO:0005524 | inferred from electronic annotation with InterPro:IPR000719, InterPro:IPR017441 <newline> vascular endothelial growth factor binding ; GO:0038085 | inferred from physical interaction with Pvf1 <newline> transmembrane receptor protein tyrosine kinase activity ; GO:0004714 | inferred from biological aspect of ancestor with PANTHER:PTN002356460 <newline> transmembrane rece…
FBgn0267689	CG46025	FastEpistasis	1	0	0	0	0	1	0		molecular_function ; GO:0003674 | no biological data available
FBgn0260442	rhea	FastEpistasis	1	0	0	0	0	1	0		protein binding ; GO:0005515 | inferred from physical interaction with wech <newline> integrin binding ; GO:0005178 | inferred from biological aspect of ancestor with PANTHER:PTN001072688 <newline> actin filament binding ; GO:0051015 | inferred from electronic annotation with InterPro:IPR006077 <newline> structural constituent of cytoskeleton ; GO:0005200 | inferred from electronic annotation wit…
FBgn0051004	mesh	FastEpistasis	1	0	0	0	0	0	1		protein binding ; GO:0005515 | inferred from physical interaction with UniProtKB:Q9VW87 <newline> protein binding ; GO:0005515 | inferred from physical interaction with UniProtKB:O46101
FBgn0000097	aop	FastEpistasis	0	1	0	0	0	0	0		protein binding ; GO:0005515 | inferred from physical interaction with edl <newline> RNA polymerase II regulatory region sequence-specific DNA binding ; GO:0000977 | inferred from direct assay <newline> DNA-binding transcription repressor activity, RNA polymerase II-specific ; GO:0001227 | inferred from direct assay <newline> DNA binding ; GO:0003677 | inferred from direct assay <newline> DNA-bin…
FBgn0261112	APP-BP1	FastEpistasis	0	1	0	0	0	0	0		protein heterodimerization activity ; GO:0046982 | inferred from sequence or structural similarity with UniProtKB:Q13564 <newline> protein binding ; GO:0005515 | inferred from physical interaction with Appl <newline> NEDD8 activating enzyme activity ; GO:0019781 | contributes_to inferred from sequence or structural similarity with UniProtKB:Q13564 <newline> NEDD8 activating enzyme activity ; GO:0…
FBgn0265598	Bx	FastEpistasis	0	1	0	0	0	0	0		protein binding ; GO:0005515 | inferred from physical interaction with pnr inferred from physical interaction with chianti
FBgn0052183	Ccn	FastEpistasis	0	1	0	0	0	0	0		heparin binding ; GO:0008201 | inferred from biological aspect of ancestor with PANTHER:PTN000142748 <newline> integrin binding ; GO:0005178 | inferred from biological aspect of ancestor with PANTHER:PTN000142748
FBgn0036193	CG14135	FastEpistasis	0	1	0	0	0	0	0		nucleic acid binding ; GO:0003676 | inferred from electronic annotation with InterPro:IPR006612
FBgn0031564	CG2816	FastEpistasis	0	1	0	0	0	0	0		serine-type endopeptidase inhibitor activity ; GO:0004867 | inferred from electronic annotation with InterPro:IPR002223
FBgn0031468	CG2975	FastEpistasis	0	1	0	0	0	0	0		glycoprotein-N-acetylgalactosamine 3-beta-galactosyltransferase activity ; GO:0016263 | inferred from biological aspect of ancestor with PANTHER:PTN000547277 <newline> beta-1,3-galactosyltransferase activity ; GO:0048531 | inferred from direct assay
FBgn0051075	CG31075	FastEpistasis	0	1	0	0	0	0	0		aldehyde dehydrogenase (NAD+) activity ; GO:0004029 | inferred from biological aspect of ancestor with PANTHER:PTN000192421 <newline> aldehyde dehydrogenase (NAD+) activity ; GO:0004029 | inferred from sequence or structural similarity with UniProtKB:P05091
FBgn0085475	CG34446	FastEpistasis	0	1	0	0	0	0	0		molecular_function ; GO:0003674 | no biological data available
FBgn0259140	CG42255	FastEpistasis	0	1	0	0	0	0	0		calcium ion binding ; GO:0005509 | inferred from electronic annotation with InterPro:IPR001881, InterPro:IPR018097
FBgn0259143	CG42258	FastEpistasis	0	1	0	0	0	0	0		-
FBgn0034742	CG4294	FastEpistasis	0	1	0	0	0	0	0		-
FBgn0262610	CG43136	FastEpistasis	0	1	0	0	0	0	0		-
FBgn0038917	CG6678	FastEpistasis	0	1	0	0	0	0	0		-
FBgn0036262	CG6910	FastEpistasis	0	1	0	0	0	0	0		iron ion binding ; GO:0005506 | inferred from electronic annotation with InterPro:IPR007828 <newline> inositol oxygenase activity ; GO:0050113 | inferred from sequence or structural similarity with UniProtKB:Q9UGB7 <newline> inositol oxygenase activity ; GO:0050113 | inferred from biological aspect of ancestor with PANTHER:PTN000287291
FBgn0037956	CG6959	FastEpistasis	0	1	0	0	0	0	0		-
FBgn0034067	CG8399	FastEpistasis	0	1	0	0	0	0	0		ferric-chelate reductase activity ; GO:0000293 | inferred from direct assay
FBgn0010497	dmGlut	FastEpistasis	0	1	0	0	0	0	0		high-affinity glutamate transmembrane transporter activity ; GO:0005314 | inferred from direct assay <newline> sodium:phosphate symporter activity ; GO:0005436 | inferred from mutant phenotype <newline> transmembrane transporter activity ; GO:0022857 | inferred from biological aspect of ancestor with PANTHER:PTN000184222 <newline> sodium:inorganic phosphate symporter activity ; GO:0015319 | NOT i…
FBgn0000567	Eip74EF	FastEpistasis	0	1	0	0	0	0	0		sequence-specific DNA binding ; GO:0043565 | inferred from electronic annotation with InterPro:IPR000418 <newline> DNA-binding transcription activator activity, RNA polymerase II-specific ; GO:0001228 | inferred from direct assay <newline> DNA-binding transcription factor activity, RNA polymerase II-specific ; GO:0000981 | inferred from biological aspect of ancestor with PANTHER:PTN000218930
FBgn0000711	flw	FastEpistasis	0	1	0	0	0	0	0		protein serine/threonine phosphatase activity ; GO:0004722 | inferred from biological aspect of ancestor with PANTHER:PTN000185233 <newline> myosin phosphatase activity ; GO:0017018 | inferred from direct assay
FBgn0041210	HDAC4	FastEpistasis	0	1	0	0	0	0	0		histone deacetylase activity ; GO:0004407 | inferred from direct assay <newline> histone deacetylase activity ; GO:0004407 | inferred from mutant phenotype <newline> protein deacetylase activity ; GO:0033558 | inferred from direct assay <newline> SUMO transferase activity ; GO:0019789 | inferred from sequence or structural similarity with UniProtKB:P56524
FBgn0052773	lncRNA:CR32773	FastEpistasis	0	1	0	0	0	0	0		molecular_function ; GO:0003674 | no biological data available
FBgn0053087	LRP1	FastEpistasis	0	1	0	0	0	0	0		calcium ion binding ; GO:0005509 | inferred from electronic annotation with InterPro:IPR001881, InterPro:IPR018097
FBgn0259110	mmd	FastEpistasis	0	1	0	0	0	0	0		metalloendopeptidase activity ; GO:0004222 | inferred from electronic annotation with InterPro:IPR001590, InterPro:IPR002870, InterPro:IPR006586
FBgn0015519	nAChRalpha3	FastEpistasis	0	1	0	0	0	0	0		acetylcholine receptor activity ; GO:0015464 | contributes_to inferred from direct assay <newline> acetylcholine-gated cation-selective channel activity ; GO:0022848 | inferred from sequence or structural similarity <newline> neurotransmitter receptor activity ; GO:0030594 | inferred from biological aspect of ancestor with PANTHER:PTN000434994 <newline> acetylcholine-gated cation-selective channe…
FBgn0051481	pb	FastEpistasis	0	1	0	0	0	0	0		RNA polymerase II cis-regulatory region sequence-specific DNA binding ; GO:0000978 | inferred from biological aspect of ancestor with PANTHER:PTN002518688 <newline> DNA-binding transcription factor activity ; GO:0003700 | inferred from biological aspect of ancestor with PANTHER:PTN002518688
FBgn0031888	Pvf2	FastEpistasis	0	1	0	0	0	0	0		growth factor activity ; GO:0008083 | inferred from electronic annotation with InterPro:IPR000072 <newline> vascular endothelial growth factor receptor binding ; GO:0005172 | inferred from sequence or structural similarity with HGNC:12680 <newline> chemoattractant activity ; GO:0042056 | inferred from mutant phenotype
FBgn0052062	Rbfox1	FastEpistasis	0	1	0	0	0	0	0		mRNA binding ; GO:0003729 | inferred from biological aspect of ancestor with PANTHER:PTN000400711 <newline> transcription regulatory region sequence-specific DNA binding ; GO:0000976 | inferred from direct assay <newline> mRNA 3'-UTR binding ; GO:0003730 | inferred from direct assay <newline> transcription factor binding ; GO:0008134 | inferred from physical interaction with ci
FBgn0035761	RhoGEF4	FastEpistasis	0	1	0	0	0	0	0		Rho guanyl-nucleotide exchange factor activity ; GO:0005089 | inferred from biological aspect of ancestor with PANTHER:PTN004377613 <newline> Rho guanyl-nucleotide exchange factor activity ; GO:0005089 | inferred from direct assay
FBgn0004057	Zw	FastEpistasis	0	1	0	0	0	0	0		NADP binding ; GO:0050661 | inferred from electronic annotation with InterPro:IPR022674, InterPro:IPR022675 <newline> glucose-6-phosphate dehydrogenase activity ; GO:0004345 | inferred from mutant phenotype
FBgn0010263	Rbp9	FastEpistasis	0	1	0	0	1	0	0		mRNA binding ; GO:0003729 | inferred from sequence or structural similarity <newline> RNA binding ; GO:0003723 | inferred from electronic annotation with InterPro:IPR002343, InterPro:IPR006548 <newline> mRNA binding ; GO:0003729 | non-traceable author statement
FBgn0038498	beat-IIa	FastEpistasis	0	0	1	0	0	0	0		molecular_function ; GO:0003674 | no biological data available
FBgn0034436	CG11961	FastEpistasis	0	0	1	0	0	0	0		-
FBgn0040660	CG13551	FastEpistasis	0	0	1	0	0	0	0		ATPase binding ; GO:0051117 | inferred from biological aspect of ancestor with PANTHER:PTN000601270 <newline> ATPase inhibitor activity ; GO:0042030 | inferred from biological aspect of ancestor with PANTHER:PTN000601270
FBgn0038775	CG17199	FastEpistasis	0	0	1	0	0	0	0		oxidoreductase activity ; GO:0016491 | inferred from electronic annotation with InterPro:IPR003767
FBgn0031473	CG3104	FastEpistasis	0	0	1	0	0	0	0		cytoskeletal anchor activity ; GO:0008093 | inferred from sequence or structural similarity with HGNC:492
FBgn0052091	CG32091	FastEpistasis	0	0	1	0	0	0	0		ATP binding ; GO:0005524 | inferred from electronic annotation with InterPro:IPR003439, InterPro:IPR017871 <newline> ATPase-coupled transmembrane transporter activity ; GO:0042626 | inferred from biological aspect of ancestor with PANTHER:PTN000443718 <newline> ATPase activity ; GO:0016887 | inferred from electronic annotation with InterPro:IPR003439, InterPro:IPR017871
FBgn0053181	CG33181	FastEpistasis	0	0	1	0	0	0	0		cation transmembrane transporter activity ; GO:0008324 | inferred from electronic annotation with InterPro:IPR006667
FBgn0259237	CG42335	FastEpistasis	0	0	1	0	0	0	0		peptide binding ; GO:0042277 | inferred from biological aspect of ancestor with PANTHER:PTN000164250 <newline> zinc ion binding ; GO:0008270 | inferred from biological aspect of ancestor with PANTHER:PTN000164250 <newline> metalloaminopeptidase activity ; GO:0070006 | inferred from biological aspect of ancestor with PANTHER:PTN000164250
FBgn0265002	CG44153	FastEpistasis	0	0	1	0	0	0	0		G protein-coupled receptor activity ; GO:0004930 | inferred from electronic annotation with InterPro:IPR001879 <newline> cell-cell adhesion mediator activity ; GO:0098632 | inferred from biological aspect of ancestor with PANTHER:PTN001296633
FBgn0034117	CG7997	FastEpistasis	0	0	1	0	0	0	0		alpha-galactosidase activity ; GO:0004557 | inferred from biological aspect of ancestor with PANTHER:PTN000155295
FBgn0032506	CG9395	FastEpistasis	0	0	1	0	0	0	0		UDP-galactosyltransferase activity ; GO:0035250 | inferred from sequence or structural similarity with UniProtKB:O16374
FBgn0039760	CG9682	FastEpistasis	0	0	1	0	0	0	0		-
FBgn0034860	CG9812	FastEpistasis	0	0	1	0	0	0	0		-
FBgn0033015	d4	FastEpistasis	0	0	1	0	0	0	0		zinc ion binding ; GO:0008270 | inferred from sequence model <newline> histone acetyltransferase activity ; GO:0004402 | inferred from biological aspect of ancestor with PANTHER:PTN000064894 <newline> histone binding ; GO:0042393 | inferred from biological aspect of ancestor with PANTHER:PTN000064894
FBgn0000577	en	FastEpistasis	0	0	1	0	0	0	0		RNA polymerase II cis-regulatory region sequence-specific DNA binding ; GO:0000978 | inferred from direct assay <newline> DNA-binding transcription repressor activity, RNA polymerase II-specific ; GO:0001227 | inferred from direct assay <newline> sequence-specific DNA binding ; GO:0043565 | inferred from biological aspect of ancestor with PANTHER:PTN000678674 <newline> RNA polymerase II regulator…
FBgn0030600	hiw	FastEpistasis	0	0	1	0	0	0	0		protein binding ; GO:0005515 | inferred from physical interaction with UniProtKB:O62609 <newline> protein binding ; GO:0005515 | inferred from physical interaction with UniProtKB:Q9V6L9 <newline> ubiquitin protein ligase activity ; GO:0061630 | inferred from sequence or structural similarity with UniProtKB:O75592 <newline> protein binding ; GO:0005515 | inferred from physical interaction with Rae…
FBgn0039647	jus	FastEpistasis	0	0	1	0	0	0	0		-
FBgn0001297	kay	FastEpistasis	0	0	1	0	0	0	0		RNA polymerase II cis-regulatory region sequence-specific DNA binding ; GO:0000978 | inferred from biological aspect of ancestor with PANTHER:PTN001156258 <newline> DNA binding ; GO:0003677 | inferred from direct assay <newline> DNA-binding transcription factor activity, RNA polymerase II-specific ; GO:0000981 | inferred from biological aspect of ancestor with PANTHER:PTN001156258 <newline> prote…
FBgn0011666	msi	FastEpistasis	0	0	1	0	0	0	0		mRNA binding ; GO:0003729 | inferred from sequence or structural similarity <newline> mRNA binding ; GO:0003729 | traceable author statement <newline> translation repressor activity, mRNA regulatory element binding ; GO:0000900 | traceable author statement <newline> RNA binding ; GO:0003723 | inferred from sequence model <newline> RNA binding ; GO:0003723 | inferred from biological aspect of ance…
FBgn0265416	Neto	FastEpistasis	0	0	1	0	0	0	0		molecular_function ; GO:0003674 | no biological data available
FBgn0033969	Pgm2b	FastEpistasis	0	0	1	0	0	0	0		intramolecular transferase activity, phosphotransferases ; GO:0016868 | inferred from electronic annotation with InterPro:IPR005844, InterPro:IPR005846, InterPro:IPR016055
FBgn0004842	RYa-R	FastEpistasis	0	0	1	0	0	0	0		peptide receptor activity ; GO:0001653 | inferred from physical interaction with RYa <newline> neuropeptide Y receptor activity ; GO:0004983 | inferred from electronic annotation with InterPro:IPR000611 <newline> neuropeptide receptor activity ; GO:0008188 | inferred from sequence model
FBgn0021764	sdk	FastEpistasis	0	0	1	0	0	0	0		-
FBgn0284221	Sema5c	FastEpistasis	0	0	1	0	0	0	0		semaphorin receptor binding ; GO:0030215 | inferred from biological aspect of ancestor with PANTHER:PTN000112368
FBgn0261055	Sfp26Ad	FastEpistasis	0	0	1	0	0	0	0		molecular_function ; GO:0003674 | no biological data available
FBgn0085400	side-V	FastEpistasis	0	0	1	0	0	0	0		-
FBgn0085450	Snoo	FastEpistasis	0	0	1	0	0	0	0		co-SMAD binding ; GO:0070410 | inferred from direct assay
FBgn0024288	Sox100B	FastEpistasis	0	0	1	0	0	0	0		cis-regulatory region sequence-specific DNA binding ; GO:0000987 | inferred from biological aspect of ancestor with PANTHER:PTN002910095 <newline> DNA-binding transcription activator activity, RNA polymerase II-specific ; GO:0001228 | inferred from biological aspect of ancestor with PANTHER:PTN002910095
FBgn0053094	Synd	FastEpistasis	0	0	1	0	0	0	0		phospholipid binding ; GO:0005543 | inferred from biological aspect of ancestor with PANTHER:PTN000860688 <newline> protein binding ; GO:0005515 | inferred from physical interaction with scra <newline> phospholipid binding ; GO:0005543 | inferred from sequence model <newline> lipid binding ; GO:0008289 | inferred from direct assay <newline> cytoskeletal protein binding ; GO:0008092 | inferred fro…
FBgn0025879	Timp	FastEpistasis	0	0	1	0	0	0	0		zinc ion binding ; GO:0008270 | inferred from sequence or structural similarity with UniProtKB:P01033 <newline> protease binding ; GO:0002020 | inferred from biological aspect of ancestor with PANTHER:PTN000931945 <newline> metalloendopeptidase inhibitor activity ; GO:0008191 | inferred from sequence or structural similarity with HGNC:11820 <newline> metalloendopeptidase inhibitor activity ; GO:0…
FBgn0085397	Fili	FastEpistasis	0	0	1	0	1	0	0		molecular_function ; GO:0003674 | no biological data available
FBgn0267668	CR46006	FastEpistasis	0	0	1	0	0	1	0		-
FBgn0000464	Lar	FastEpistasis	0	0	1	0	0	0	1		transmembrane receptor protein tyrosine phosphatase activity ; GO:0005001 | inferred from direct assay <newline> SAM domain binding ; GO:0032093 | inferred from physical interaction with ckn <newline> insulin receptor binding ; GO:0005158 | inferred from physical interaction with InR <newline> SAM domain binding ; GO:0032093 | inferred from physical interaction with Liprin-γ <newline> protein tyr…
FBgn0050085	Rif1	FastEpistasis	0	1	1	0	0	0	0		protein binding ; GO:0005515 | inferred from physical interaction with UniProtKB:P12982 <newline> protein binding ; GO:0005515 | inferred from physical interaction with UniProtKB:Q9VTE2
FBgn0264001	bru3	FastEpistasis	0	1	1	0	1	0	0		RNA binding ; GO:0003723 | inferred from direct assay <newline> RNA binding ; GO:0003723 | inferred from biological aspect of ancestor with PANTHER:PTN002768817 <newline> mRNA binding ; GO:0003729 | inferred from sequence or structural similarity <newline> mRNA binding ; GO:0003729 | inferred from biological aspect of ancestor with PANTHER:PTN000609546 <newline> protein homodimerization activity …
FBgn0052598	betaNACtes6	FastEpistasis	0	0	0	1	0	0	0		molecular_function ; GO:0003674 | no biological data available
FBgn0004580	Cbp53E	FastEpistasis	0	0	0	1	0	0	0		calcium ion binding ; GO:0005509 | traceable author statement <newline> calcium ion binding ; GO:0005509 | inferred from biological aspect of ancestor with PANTHER:PTN001461922
FBgn0030954	CCKLR-17D3	FastEpistasis	0	0	0	1	0	0	0		gastrin receptor activity ; GO:0015054 | inferred from electronic annotation with InterPro:IPR000314 <newline> G protein-coupled receptor activity ; GO:0004930 | inferred from sequence or structural similarity <newline> neuropeptide receptor activity ; GO:0008188 | inferred from sequence model
FBgn0263986	cd	FastEpistasis	0	0	0	1	0	0	0		heme binding ; GO:0020037 | inferred from electronic annotation with InterPro:IPR010255 <newline> peroxidase activity ; GO:0004601 | inferred from biological aspect of ancestor with PANTHER:PTN000158755
FBgn0032857	CG10947	FastEpistasis	0	0	0	1	0	0	0		S-adenosylmethionine-dependent methyltransferase activity ; GO:0008757 | inferred from sequence or structural similarity with SGD:S000002547 <newline> calmodulin-lysine N-methyltransferase activity ; GO:0018025 | inferred from biological aspect of ancestor with PANTHER:PTN000338794
FBgn0030499	CG11178	FastEpistasis	0	0	0	1	0	0	0		molecular_function ; GO:0003674 | no biological data available
FBgn0039633	CG11873	FastEpistasis	0	0	0	1	0	0	0		transcription coactivator activity ; GO:0003713 | inferred from biological aspect of ancestor with PANTHER:PTN000399987
FBgn0030097	CG12115	FastEpistasis	0	0	0	1	0	0	0		molecular_function ; GO:0003674 | no biological data available
FBgn0038961	CG13850	FastEpistasis	0	0	0	1	0	0	0		protein kinase activity ; GO:0004672 | inferred from electronic annotation with InterPro:IPR010622 <newline> molecular_function ; GO:0003674 | no biological data available
FBgn0035157	CG13894	FastEpistasis	0	0	0	1	0	0	0		DNA binding ; GO:0003677 | inferred from electronic annotation with InterPro:IPR009057
FBgn0038611	CG14309	FastEpistasis	0	0	0	1	0	0	0		-
FBgn0050265	CG30265	FastEpistasis	0	0	0	1	0	0	0		transmembrane transporter activity ; GO:0022857 | inferred from biological aspect of ancestor with PANTHER:PTN000184222
FBgn0051121	CG31121	FastEpistasis	0	0	0	1	0	0	0		ATP binding ; GO:0005524 | inferred from electronic annotation with InterPro:IPR003439 <newline> ATPase-coupled transmembrane transporter activity ; GO:0042626 | inferred from biological aspect of ancestor with PANTHER:PTN000443718 <newline> ATPase activity ; GO:0016887 | inferred from electronic annotation with InterPro:IPR003439
FBgn0051445	CG31445	FastEpistasis	0	0	0	1	0	0	0		metalloaminopeptidase activity ; GO:0070006 | inferred from biological aspect of ancestor with PANTHER:PTN000164250 <newline> peptide binding ; GO:0042277 | inferred from biological aspect of ancestor with PANTHER:PTN000164250 <newline> zinc ion binding ; GO:0008270 | inferred from biological aspect of ancestor with PANTHER:PTN000164250
FBgn0052280	CG32280	FastEpistasis	0	0	0	1	0	0	0		molecular_function ; GO:0003674 | no biological data available
FBgn0052588	CG32588	FastEpistasis	0	0	0	1	0	0	0		molecular_function ; GO:0003674 | no biological data available
FBgn0053225	CG33225	FastEpistasis	0	0	0	1	0	0	0		serine-type endopeptidase activity ; GO:0004252 | inferred from biological aspect of ancestor with PANTHER:PTN001207268 <newline> serine-type endopeptidase activity ; GO:0004252 | NOT inferred from key residues
FBgn0085264	CG34235	FastEpistasis	0	0	0	1	0	0	0		molecular_function ; GO:0003674 | no biological data available
FBgn0085415	CG34386	FastEpistasis	0	0	0	1	0	0	0		-
FBgn0034958	CG3907	FastEpistasis	0	0	0	1	0	0	0		-
FBgn0260659	CG42542	FastEpistasis	0	0	0	1	0	0	0		manganese ion transmembrane transporter activity ; GO:0005384 | inferred from biological aspect of ancestor with PANTHER:PTN001759499 <newline> calcium ion transmembrane transporter activity ; GO:0015085 | inferred from biological aspect of ancestor with PANTHER:PTN001759499 <newline> metal ion transmembrane transporter activity ; GO:0046873 | inferred from biological aspect of ancestor with PANT…
FBgn0035260	CG7991	FastEpistasis	0	0	0	1	0	0	0		-
FBgn0033702	CG8854	FastEpistasis	0	0	0	1	0	0	0		molecular_function ; GO:0003674 | no biological data available
FBgn0029939	CG9650	FastEpistasis	0	0	0	1	0	0	0		DNA-binding transcription factor activity ; GO:0003700 | inferred from biological aspect of ancestor with PANTHER:PTN001905569 <newline> sequence-specific DNA binding ; GO:0043565 | inferred from biological aspect of ancestor with PANTHER:PTN001905569
FBgn0015371	chn	FastEpistasis	0	0	0	1	0	0	0		sequence-specific DNA binding ; GO:0043565 | inferred from direct assay <newline> DNA-binding transcription factor activity, RNA polymerase II-specific ; GO:0000981 | inferred from direct assay <newline> protein binding ; GO:0005515 | inferred from physical interaction with CoRest <newline> DNA-binding transcription repressor activity, RNA polymerase II-specific ; GO:0001227 | inferred from direc…
FBgn0023441	fus	FastEpistasis	0	0	0	1	0	0	0		mRNA binding ; GO:0003729 | inferred from direct assay <newline> mRNA binding ; GO:0003729 | inferred from biological aspect of ancestor with PANTHER:PTN004449059 <newline> RNA binding ; GO:0003723 | inferred from biological aspect of ancestor with PANTHER:PTN000360053 <newline> mRNA binding ; GO:0003729 | inferred from sequence or structural similarity
FBgn0262699	fzr	FastEpistasis	0	0	0	1	0	0	0		ubiquitin ligase activator activity ; GO:1990757 | inferred from biological aspect of ancestor with PANTHER:PTN000460086 <newline> anaphase-promoting complex binding ; GO:0010997 | inferred from biological aspect of ancestor with PANTHER:PTN000460086
FBgn0267336	Glut4EF	FastEpistasis	0	0	0	1	0	0	0		nucleic acid binding ; GO:0003676 | inferred from electronic annotation with InterPro:IPR013087
FBgn0041250	Gr21a	FastEpistasis	0	0	0	1	0	0	0		taste receptor activity ; GO:0008527 | non-traceable author statement <newline> taste receptor activity ; GO:0008527 | inferred from biological aspect of ancestor with PANTHER:PTN001080220 <newline> olfactory receptor activity ; GO:0004984 | inferred from biological aspect of ancestor with PANTHER:PTN001465599
FBgn0052082	IRSp53	FastEpistasis	0	0	0	1	0	0	0		phospholipid binding ; GO:0005543 | inferred from sequence or structural similarity with MGI:MGI:2652819
FBgn0010786	l(3)02640	FastEpistasis	0	0	0	1	0	0	0		hydroxymethylbilane synthase activity ; GO:0004418 | inferred from biological aspect of ancestor with PANTHER:PTN000168159
FBgn0085440	Lgr4	FastEpistasis	0	0	0	1	0	0	0		neuropeptide receptor activity ; GO:0008188 | inferred from sequence model <newline> G protein-coupled peptide receptor activity ; GO:0008528 | inferred from biological aspect of ancestor with PANTHER:PTN001224574 <newline> protein-hormone receptor activity ; GO:0016500 | inferred from sequence or structural similarity
FBgn0261836	Msp300	FastEpistasis	0	0	0	1	0	0	0		protein binding ; GO:0005515 | inferred from physical interaction with klar <newline> actin binding ; GO:0003779 | inferred from direct assay <newline> protein kinase binding ; GO:0019901 | inferred from physical interaction with sls <newline> actin filament binding ; GO:0051015 | inferred from biological aspect of ancestor with PANTHER:PTN002934743
FBgn0266464	Nsf2	FastEpistasis	0	0	0	1	0	0	0		ATP binding ; GO:0005524 | inferred from electronic annotation with InterPro:IPR003959, InterPro:IPR003960 <newline> ATPase activity ; GO:0016887 | inferred from sequence or structural similarity with comt <newline> ATPase activity ; GO:0016887 | inferred from biological aspect of ancestor with PANTHER:PTN000554891
FBgn0025360	Optix	FastEpistasis	0	0	0	1	0	0	0		sequence-specific DNA binding ; GO:0043565 | inferred from direct assay <newline> transcription regulatory region sequence-specific DNA binding ; GO:0000976 | inferred from biological aspect of ancestor with PANTHER:PTN000044272 <newline> DNA-binding transcription factor activity, RNA polymerase II-specific ; GO:0000981 | inferred from biological aspect of ancestor with PANTHER:PTN000044272
FBgn0003089	pip	FastEpistasis	0	0	0	1	0	0	0		sulfotransferase activity ; GO:0008146 | inferred from mutant phenotype <newline> sulfotransferase activity ; GO:0008146 | inferred from biological aspect of ancestor with PANTHER:PTN000951070 <newline> heparan sulfate sulfotransferase activity ; GO:0034483 | NOT inferred from direct assay <newline> chondroitin sulfotransferase activity ; GO:0034481 | NOT inferred from direct assay <newline> prot…
FBgn0020258	ppk	FastEpistasis	0	0	0	1	0	0	0		acid-sensing ion channel activity ; GO:0044736 | inferred from mutant phenotype <newline> sodium channel activity ; GO:0005272 | inferred from sequence or structural similarity with MGI:MGI:101782
FBgn0004370	Ptp10D	FastEpistasis	0	0	0	1	0	0	0		transmembrane receptor protein tyrosine phosphatase activity ; GO:0005001 | inferred from direct assay <newline> protein tyrosine phosphatase activity ; GO:0004725 | inferred from biological aspect of ancestor with PANTHER:PTN000439233
FBgn0013334	Sap47	FastEpistasis	0	0	0	1	0	0	0		molecular_function ; GO:0003674 | no biological data available
FBgn0261873	sdt	FastEpistasis	0	0	0	1	0	0	0		protein binding ; GO:0005515 | inferred from physical interaction with par-6 <newline> guanylate kinase activity ; GO:0004385 | inferred from sequence or structural similarity with MGI:MGI:1927339
FBgn0266411	sima	FastEpistasis	0	0	0	1	0	0	0		protein dimerization activity ; GO:0046983 | inferred from electronic annotation with InterPro:IPR011598 <newline> DNA-binding transcription factor activity, RNA polymerase II-specific ; GO:0000981 | inferred from biological aspect of ancestor with PANTHER:PTN000548738 <newline> DNA-binding transcription activator activity, RNA polymerase II-specific ; GO:0001228 | inferred from direct assay
FBgn0259678	sqa	FastEpistasis	0	0	0	1	0	0	0		myosin light chain kinase activity ; GO:0004687 | inferred from biological aspect of ancestor with PANTHER:PTN002389378 <newline> ATP binding ; GO:0005524 | inferred from electronic annotation with InterPro:IPR000719, InterPro:IPR002290, InterPro:IPR017441 <newline> protein kinase activity ; GO:0004672 | inferred from genetic interaction with Tsc1 <newline> protein serine/threonine kinase activit…
FBgn0038652	CG7720	FastEpistasis	0	0	0	1	1	0	0		symporter activity ; GO:0015293 | inferred from biological aspect of ancestor with PANTHER:PTN000213468
FBgn0265045	Strn-Mlck	FastEpistasis	0	0	0	1	1	0	0		ATP binding ; GO:0005524 | inferred from electronic annotation with InterPro:IPR000719, InterPro:IPR002290, InterPro:IPR017441 <newline> calmodulin-dependent protein kinase activity ; GO:0004683 | inferred from direct assay <newline> myosin light chain kinase activity ; GO:0004687 | inferred from sequence or structural similarity inferred from direct assay <newline> structural constituent of cyto…
FBgn0263219	Dscam4	FastEpistasis	0	0	0	1	0	0	1		identical protein binding ; GO:0042802 | inferred from sequence or structural similarity with Dscam2 <newline> cell-cell adhesion mediator activity ; GO:0098632 | inferred from biological aspect of ancestor with PANTHER:PTN001296633
FBgn0032151	nAChRalpha6	FastEpistasis	0	0	0	1	0	0	1		transmembrane signaling receptor activity ; GO:0004888 | inferred from electronic annotation with InterPro:IPR006201 <newline> neurotransmitter receptor activity ; GO:0030594 | inferred from biological aspect of ancestor with PANTHER:PTN000434994 <newline> acetylcholine-gated cation-selective channel activity ; GO:0022848 | contributes_to inferred from direct assay <newline> acetylcholine-gated c…
FBgn0266137	Dop1R2	FastEpistasis	1	0	0	1	0	0	0		dopamine neurotransmitter receptor activity ; GO:0004952 | inferred from sequence or structural similarity <newline> dopamine neurotransmitter receptor activity, coupled via Gs ; GO:0001588 | inferred from sequence or structural similarity with Dop1R1 inferred from sequence or structural similarity with HGNC:3020 inferred from direct assay <newline> dopamine neurotransmitter receptor activity, co…
FBgn0266756	btsz	FastEpistasis	0	1	0	1	0	0	0		Rab GTPase binding ; GO:0017137 | inferred from electronic annotation with InterPro:IPR010911 <newline> neurexin family protein binding ; GO:0042043 | inferred from biological aspect of ancestor with PANTHER:PTN005238642
FBgn0028369	kirre	FastEpistasis	0	1	0	1	0	0	0		protein binding ; GO:0005515 | inferred from physical interaction with rols <newline> cell adhesion molecule binding ; GO:0050839 | inferred from physical interaction with pyd
FBgn0050104	NT5E-2	FastEpistasis	0	1	0	1	0	0	0		nucleotide binding ; GO:0000166 | inferred from electronic annotation with InterPro:IPR006146 <newline> metal ion binding ; GO:0046872 | inferred from electronic annotation with InterPro:IPR006146 <newline> 5'-nucleotidase activity ; GO:0008253 | inferred from direct assay <newline> 5'-nucleotidase activity ; GO:0008253 | inferred from biological aspect of ancestor with PANTHER:PTN000903092
FBgn0038422	CG14880	FastEpistasis	0	0	1	1	0	0	0		chitin binding ; GO:0008061 | inferred from electronic annotation with InterPro:IPR002557
FBgn0036043	CG8177	FastEpistasis	0	0	1	1	0	0	0		inorganic anion exchanger activity ; GO:0005452 | inferred from electronic annotation with InterPro:IPR001717, InterPro:IPR003020
FBgn0028482	bdl	FastLMM	0	0	0	0	1	0	0		cell-cell adhesion mediator activity ; GO:0098632 | inferred from biological aspect of ancestor with PANTHER:PTN001296633 <newline> cell-cell adhesion mediator activity ; GO:0098632 | inferred from physical interaction with tutl
FBgn0033498	CG12209	FastLMM	0	0	0	0	1	0	0		molecular_function ; GO:0003674 | no biological data available
FBgn0031048	CG12237	FastLMM	0	0	0	0	1	0	0		phosphatase activity ; GO:0016791 | inferred from biological aspect of ancestor with PANTHER:PTN000467154 <newline> pyrophosphatase activity ; GO:0016462 | inferred from sequence or structural similarity with HGNC:16815
FBgn0030729	CG12507	FastLMM	0	0	0	0	1	0	0		molecular_function ; GO:0003674 | no biological data available
FBgn0030759	CG13014	FastLMM	0	0	0	0	1	0	0		-
FBgn0035816	CG13685	FastLMM	0	0	0	0	1	0	0		molecular_function ; GO:0003674 | no biological data available
FBgn0052373	CG32373	FastLMM	0	0	0	0	1	0	0		calcium ion binding ; GO:0005509 | inferred from electronic annotation with InterPro:IPR001881, InterPro:IPR018097
FBgn0031513	CG3347	FastLMM	0	0	0	0	1	0	0		-
FBgn0265595	CG44422	FastLMM	0	0	0	0	1	0	0		calcium ion binding ; GO:0005509 | inferred from electronic annotation with InterPro:IPR002048, InterPro:IPR028846
FBgn0266801	CG45263	FastLMM	0	0	0	0	1	0	0		-
FBgn0034144	CG5089	FastLMM	0	0	0	0	1	0	0		-
FBgn0039342	CG5107	FastLMM	0	0	0	0	1	0	0		-
FBgn0035673	CG6602	FastLMM	0	0	0	0	1	0	0		-
FBgn0034143	CG8303	FastLMM	0	0	0	0	1	0	0		fatty-acyl-CoA reductase (alcohol-forming) activity ; GO:0080019 | inferred from sequence or structural similarity with HGNC:26222 <newline> fatty-acyl-CoA reductase (alcohol-forming) activity ; GO:0080019 | inferred from biological aspect of ancestor with PANTHER:PTN000110226 <newline> fatty-acyl-CoA reductase (alcohol-forming) activity ; GO:0080019 | inferred from sequence or structural similar…
FBgn0036783	CheA75a	FastLMM	0	0	0	0	1	0	0		molecular_function ; GO:0003674 | no biological data available
FBgn0029920	CR4575	FastLMM	0	0	0	0	1	0	0		-
FBgn0037993	dpr15	FastLMM	0	0	0	0	1	0	0		molecular_function ; GO:0003674 | no biological data available
FBgn0052666	Drak	FastLMM	0	0	0	0	1	0	0		protein serine/threonine kinase activity ; GO:0004674 | inferred from biological aspect of ancestor with PANTHER:PTN000678761 <newline> ATP binding ; GO:0005524 | inferred from electronic annotation with InterPro:IPR000719
FBgn0261988	Gprk2	FastLMM	0	0	0	0	1	0	0		ATP binding ; GO:0005524 | inferred from electronic annotation with InterPro:IPR000239, InterPro:IPR000719, InterPro:IPR000961, InterPro:IPR002290, InterPro:IPR017441 <newline> protein serine/threonine kinase activity ; GO:0004674 | inferred from mutant phenotype <newline> phosphatidylinositol-4-phosphate binding ; GO:0070273 | inferred from direct assay <newline> protein serine/threonine kinase …
FBgn0005619	Hdc	FastLMM	0	0	0	0	1	0	0		pyridoxal phosphate binding ; GO:0030170 | inferred from electronic annotation with InterPro:IPR002129 <newline> histidine decarboxylase activity ; GO:0004398 | inferred from sequence or structural similarity inferred from mutant phenotype
FBgn0001248	Idh	FastLMM	0	0	0	0	1	0	0		isocitrate dehydrogenase activity ; GO:0004448 | inferred from mutant phenotype <newline> NAD binding ; GO:0051287 | inferred from electronic annotation with InterPro:IPR019818 <newline> magnesium ion binding ; GO:0000287 | inferred from electronic annotation with InterPro:IPR019818 <newline> isocitrate dehydrogenase (NADP+) activity ; GO:0004450 | inferred from direct assay <newline> isocitrate …
FBgn0083979	Ir10a	FastLMM	0	0	0	0	1	0	0		ligand-gated ion channel activity ; GO:0015276 | inferred from sequence model
FBgn0264261	lncRNA:CR43761	FastLMM	0	0	0	0	1	0	0		-
FBgn0260660	Mp	FastLMM	0	0	0	0	1	0	0		structural molecule activity ; GO:0005198 | inferred from electronic annotation with InterPro:IPR010515 <newline> carbohydrate binding ; GO:0030246 | inferred from sequence or structural similarity with Lectin-galC1
FBgn0000036	nAChRalpha1	FastLMM	0	0	0	0	1	0	0		acetylcholine receptor activity ; GO:0015464 | contributes_to inferred from direct assay <newline> acetylcholine-gated cation-selective channel activity ; GO:0022848 | contributes_to inferred from direct assay <newline> neurotransmitter receptor activity ; GO:0030594 | inferred from biological aspect of ancestor with PANTHER:PTN000434994 <newline> acetylcholine-gated cation-selective channel acti…
FBgn0263289	scrib	FastLMM	0	0	0	0	1	0	0		protein binding ; GO:0005515 | inferred from physical interaction with gukh
FBgn0031049	Sec61gamma	FastLMM	0	0	0	0	1	0	0		P-P-bond-hydrolysis-driven protein transmembrane transporter activity ; GO:0015450 | inferred from electronic annotation with InterPro:IPR008158 <newline> protein transmembrane transporter activity ; GO:0008320 | inferred from biological aspect of ancestor with PANTHER:PTN000267681
FBgn0011259	Sema1a	FastLMM	0	0	0	0	1	0	0		semaphorin receptor binding ; GO:0030215 | inferred from biological aspect of ancestor with PANTHER:PTN000112368 <newline> semaphorin receptor binding ; GO:0030215 | traceable author statement <newline> protein binding ; GO:0005515 | inferred from physical interaction with PlexA <newline> heparin binding ; GO:0008201 | inferred from direct assay <newline> chemorepellent activity ; GO:0045499 | in…
FBgn0259923	Septin 4	FastLMM	0	0	0	0	1	0	0		GTP binding ; GO:0005525 | inferred from electronic annotation with InterPro:IPR016491, InterPro:IPR030379 <newline> GTPase activity ; GO:0003924 | inferred from sequence or structural similarity with pnut <newline> GTPase activity ; GO:0003924 | inferred from biological aspect of ancestor with PANTHER:PTN000430171 <newline> molecular adaptor activity ; GO:0060090 | inferred from biological aspec…
FBgn0015615	SMC3	FastLMM	0	0	0	0	1	0	0		protein heterodimerization activity ; GO:0046982 | inferred from sequence or structural similarity with HGNC:2468 <newline> ATP binding ; GO:0005524 | inferred from electronic annotation with InterPro:IPR010935 <newline> chromatin binding ; GO:0003682 | inferred from sequence or structural similarity with MGI:MGI:1339795
FBgn0011722	Tig	FastLMM	0	0	0	0	1	0	0		integrin binding ; GO:0005178 | inferred from physical interaction with if, mys
FBgn0261649	tinc	FastLMM	0	0	0	0	1	0	0		molecular_function ; GO:0003674 | no biological data available
FBgn0011982	tRNA:Ser-AGA-2-1	FastLMM	0	0	0	0	1	0	0		UCU codon-amino acid adaptor activity ; GO:0033405 | inferred from sequence model
FBgn0011980	tRNA:Ser-AGA-3-1	FastLMM	0	0	0	0	1	0	0		UCU codon-amino acid adaptor activity ; GO:0033405 | inferred from sequence model
FBgn0267384	Ubc7	FastLMM	0	0	0	0	1	0	0		ubiquitin conjugating enzyme activity ; GO:0061631 | inferred from biological aspect of ancestor with PANTHER:PTN000629793 <newline> ubiquitin-protein transferase activity ; GO:0004842 | inferred from sequence or structural similarity with HGNC:12482
FBgn0052677	X11Lbeta	FastLMM	0	0	0	0	1	0	0		-
FBgn0034152	Acp53C14a	FastLMM	0	0	0	0	0	1	0		molecular_function ; GO:0003674 | no biological data available
FBgn0034153	Acp53C14b	FastLMM	0	0	0	0	0	1	0		molecular_function ; GO:0003674 | no biological data available
FBgn0000216	Brd	FastLMM	0	0	0	0	0	1	0		ubiquitin protein ligase binding ; GO:0031625 | inferred from physical interaction with neur
FBgn0261999	Ca-Ma2d	FastLMM	0	0	0	0	0	1	0		voltage-gated calcium channel activity ; GO:0005245 | inferred from biological aspect of ancestor with PANTHER:PTN000018330
FBgn0033440	CG10459	FastLMM	0	0	0	0	0	1	0		molecular_function ; GO:0003674 | no biological data available
FBgn0036368	CG10738	FastLMM	0	0	0	0	0	1	0		signaling receptor activity ; GO:0038023 | inferred from sequence or structural similarity with Gyc76C <newline> ATP binding ; GO:0005524 | inferred from electronic annotation with InterPro:IPR000719 <newline> protein kinase activity ; GO:0004672 | NOT inferred from key residues <newline> peptide receptor activity ; GO:0001653 | inferred from biological aspect of ancestor with PANTHER:PTN00022924…
FBgn0030073	CG10962	FastLMM	0	0	0	0	0	1	0		17-beta-hydroxysteroid dehydrogenase (NADP+) activity ; GO:0072582 | inferred from sequence or structural similarity with UniProtKB:Q6UWP2 <newline> estradiol 17-beta-dehydrogenase activity ; GO:0004303 | inferred from sequence or structural similarity with UniProtKB:Q6UWP2 <newline> 17-beta-ketosteroid reductase activity ; GO:0072555 | inferred from sequence or structural similarity with UniProt…
FBgn0033174	CG11125	FastLMM	0	0	0	0	0	1	0		-
FBgn0030065	CG12075	FastLMM	0	0	0	0	0	1	0		-
FBgn0036586	CG13070	FastLMM	0	0	0	0	0	1	0		molecular_function ; GO:0003674 | no biological data available
FBgn0036585	CG13071	FastLMM	0	0	0	0	0	1	0		-
FBgn0038658	CG14292	FastLMM	0	0	0	0	0	1	0		-
FBgn0032489	CG15480	FastLMM	0	0	0	0	0	1	0		-
FBgn0033439	CG1773	FastLMM	0	0	0	0	0	1	0		serine-type endopeptidase activity ; GO:0004252 | inferred from electronic annotation with InterPro:IPR001254, InterPro:IPR001314, InterPro:IPR018114 <newline> serine-type endopeptidase activity ; GO:0004252 | inferred from sequence model
FBgn0260474	CG30002	FastLMM	0	0	0	0	0	1	0		serine-type endopeptidase activity ; GO:0004252 | inferred from electronic annotation with InterPro:IPR001254, InterPro:IPR001314, InterPro:IPR018114 <newline> serine-type endopeptidase activity ; GO:0004252 | inferred from sequence model
FBgn0261267	CG42615	FastLMM	0	0	0	0	0	1	0		-
FBgn0261571	CG42685	FastLMM	0	0	0	0	0	1	0		-
FBgn0032217	CG4972	FastLMM	0	0	0	0	0	1	0		-
FBgn0032225	CG5022	FastLMM	0	0	0	0	0	1	0		cytoskeletal protein binding ; GO:0008092 | inferred from electronic annotation with InterPro:IPR000798
FBgn0035902	CG6683	FastLMM	0	0	0	0	0	1	0		molecular_function ; GO:0003674 | no biological data available
FBgn0035903	CG6765	FastLMM	0	0	0	0	0	1	0		nucleic acid binding ; GO:0003676 | inferred from electronic annotation with InterPro:IPR013087 <newline> molecular_function ; GO:0003674 | no biological data available
FBgn0035812	CG7457	FastLMM	0	0	0	0	0	1	0		molecular_function ; GO:0003674 | no biological data available
FBgn0027585	CG8740	FastLMM	0	0	0	0	0	1	0		-
FBgn0000490	dpp	FastLMM	0	0	0	0	0	1	0		morphogen activity ; GO:0016015 | inferred from genetic interaction with dally <newline> morphogen activity ; GO:0016015 | inferred from mutant phenotype <newline> growth factor activity ; GO:0008083 | inferred from electronic annotation with InterPro:IPR001111, InterPro:IPR001839, InterPro:IPR017948 <newline> collagen binding ; GO:0005518 | inferred from direct assay <newline> BMP receptor bindi…
FBgn0024244	drm	FastLMM	0	0	0	0	0	1	0		protein binding ; GO:0005515 | inferred from physical interaction with UniProtKB:Q9V4Z9 <newline> RNA polymerase II regulatory region sequence-specific DNA binding ; GO:0000977 | inferred from biological aspect of ancestor with PANTHER:PTN000367524
FBgn0020445	E23	FastLMM	0	0	0	0	0	1	0		ATP binding ; GO:0005524 | inferred from electronic annotation with InterPro:IPR003439, InterPro:IPR017871 <newline> ATPase-coupled transmembrane transporter activity ; GO:0042626 | inferred from biological aspect of ancestor with PANTHER:PTN000443718 <newline> ATPase-coupled transmembrane transporter activity ; GO:0042626 | inferred from sequence or structural similarity with UniProtKB:P10090 <n…
FBgn0050502	fa2h	FastLMM	0	0	0	0	0	1	0		fatty acid alpha-hydroxylase activity ; GO:0080132 | inferred from mutant phenotype <newline> heme binding ; GO:0020037 | inferred from electronic annotation with InterPro:IPR018506 <newline> iron ion binding ; GO:0005506 | inferred from electronic annotation with InterPro:IPR006694 <newline> fatty acid alpha-hydroxylase activity ; GO:0080132 | inferred from biological aspect of ancestor with PAN…
FBgn0001098	Gdh	FastLMM	0	0	0	0	0	1	0		glutamate dehydrogenase (NAD+) activity ; GO:0004352 | inferred from direct assay <newline> identical protein binding ; GO:0042802 | inferred from direct assay <newline> glutamate dehydrogenase (NAD+) activity ; GO:0004352 | inferred from biological aspect of ancestor with PANTHER:PTN000176230 <newline> glutamate dehydrogenase [NAD(P)+] activity ; GO:0004353 | inferred from direct assay <newline>…
FBgn0004381	Klp68D	FastLMM	0	0	0	0	0	1	0		ATPase activity ; GO:0016887 | inferred from biological aspect of ancestor with PANTHER:PTN000648413 <newline> ATP binding ; GO:0005524 | inferred from electronic annotation with InterPro:IPR001752, InterPro:IPR019821 <newline> microtubule motor activity ; GO:0003777 | inferred from biological aspect of ancestor with PANTHER:PTN000648413 <newline> motor activity ; GO:0003774 | inferred from seque…
FBgn0026411	Lim1	FastLMM	0	0	0	0	0	1	0		RNA polymerase II regulatory region sequence-specific DNA binding ; GO:0000977 | inferred from biological aspect of ancestor with PANTHER:PTN000654232 <newline> DNA-binding transcription factor activity, RNA polymerase II-specific ; GO:0000981 | inferred from biological aspect of ancestor with PANTHER:PTN000654232
FBgn0283521	lola	FastLMM	0	0	0	0	0	1	0		protein binding ; GO:0005515 | inferred from physical interaction with JIL-1 <newline> DNA-binding transcription factor activity ; GO:0003700 | inferred from sequence or structural similarity with ttk <newline> DNA binding ; GO:0003677 | inferred from direct assay
FBgn0028875	nAChRalpha5	FastLMM	0	0	0	0	0	1	0		transmembrane signaling receptor activity ; GO:0004888 | inferred from electronic annotation with InterPro:IPR006201 <newline> acetylcholine-gated cation-selective channel activity ; GO:0022848 | inferred from direct assay <newline> acetylcholine binding ; GO:0042166 | inferred from direct assay <newline> acetylcholine-gated cation-selective channel activity ; GO:0022848 | contributes_to inferred…
FBgn0040296	Ocho	FastLMM	0	0	0	0	0	1	0		ubiquitin protein ligase binding ; GO:0031625 | inferred from physical interaction with neur
FBgn0036354	Poc1	FastLMM	0	0	0	0	0	1	0		-
FBgn0035901	Pus7	FastLMM	0	0	0	0	0	1	0		RNA binding ; GO:0003723 | inferred from electronic annotation with InterPro:IPR001656, InterPro:IPR011760, InterPro:IPR020103 <newline> pseudouridine synthase activity ; GO:0009982 | inferred from biological aspect of ancestor with PANTHER:PTN000330437
FBgn0003175	px	FastLMM	0	0	0	0	0	1	0		-
FBgn0033897	Rcd1	FastLMM	0	0	0	0	0	1	0		histone acetyltransferase activity (H4-K16 specific) ; GO:0046972 | contributes_to inferred from biological aspect of ancestor with PANTHER:PTN000992949 <newline> histone acetyltransferase activity (H4-K5 specific) ; GO:0043995 | contributes_to inferred from biological aspect of ancestor with PANTHER:PTN000992949 <newline> hydrolase activity ; GO:0016787 | inferred from electronic annotation with…
FBgn0261549	rdgA	FastLMM	0	0	0	0	0	1	0		NAD+ kinase activity ; GO:0003951 | inferred from electronic annotation with InterPro:IPR017438 <newline> diacylglycerol kinase activity ; GO:0004143 | inferred from sequence or structural similarity with Dgk <newline> diacylglycerol kinase activity ; GO:0004143 | traceable author statement <newline> diacylglycerol kinase activity ; GO:0004143 | inferred from biological aspect of ancestor with PA…
FBgn0034709	Swim	FastLMM	0	0	0	0	0	1	0		polysaccharide binding ; GO:0030247 | inferred from electronic annotation with InterPro:IPR001212 <newline> scavenger receptor activity ; GO:0005044 | inferred from electronic annotation with InterPro:IPR001212 <newline> cysteine-type peptidase activity ; GO:0008234 | NOT inferred from sequence or structural similarity with UniProtKB:Q9GZM7 <newline> Wnt-protein binding ; GO:0017147 | inferred fr…
FBgn0003720	tll	FastLMM	0	0	0	0	0	1	0		steroid hormone receptor activity ; GO:0003707 | inferred from electronic annotation with InterPro:IPR001723 <newline> zinc ion binding ; GO:0008270 | inferred from electronic annotation with InterPro:IPR001628, InterPro:IPR013088 <newline> DNA-binding transcription factor activity, RNA polymerase II-specific ; GO:0000981 | inferred from direct assay <newline> nuclear receptor activity ; GO:00048…
FBgn0032216	Usp14	FastLMM	0	0	0	0	0	1	0		thiol-dependent ubiquitin-specific protease activity ; GO:0004843 | inferred from sequence or structural similarity with HGNC:12612
FBgn0259236	comm3	FastLMM	0	0	0	0	1	1	0		-
FBgn0040071	tara	FastLMM	0	0	0	0	1	1	0		-
FBgn0035649	CG10483	FastLMM	0	0	0	0	0	0	1		phosphate ion transmembrane transporter activity ; GO:0015114 | inferred from biological aspect of ancestor with PANTHER:PTN000081884 <newline> inositol hexakisphosphate binding ; GO:0000822 | inferred from biological aspect of ancestor with PANTHER:PTN000081884
FBgn0035928	CG13310	FastLMM	0	0	0	0	0	0	1		-
FBgn0035929	CG13311	FastLMM	0	0	0	0	0	0	1		-
FBgn0033403	CG13739	FastLMM	0	0	0	0	0	0	1		chromatin binding ; GO:0003682 | inferred from electronic annotation with InterPro:IPR033031
FBgn0033405	CG13954	FastLMM	0	0	0	0	0	0	1		-
FBgn0028496	CG30116	FastLMM	0	0	0	0	0	0	1		-
FBgn0050122	CG30122	FastLMM	0	0	0	0	0	0	1		-
FBgn0052407	CG32407	FastLMM	0	0	0	0	0	0	1		-
FBgn0259244	CG42342	FastLMM	0	0	0	0	0	0	1		extracellular matrix structural constituent ; GO:0005201 | inferred from biological aspect of ancestor with PANTHER:PTN002513067
FBgn0259699	CG42353	FastLMM	0	0	0	0	0	0	1		-
FBgn0259700	CG42354	FastLMM	0	0	0	0	0	0	1		-
FBgn0262352	CG43050	FastLMM	0	0	0	0	0	0	1		molecular_function ; GO:0003674 | no biological data available
FBgn0264911	CG44102	FastLMM	0	0	0	0	0	0	1		molecular_function ; GO:0003674 | no biological data available
FBgn0035499	Chd64	FastLMM	0	0	0	0	0	0	1		juvenile hormone response element binding ; GO:0070594 | inferred from direct assay <newline> protein binding ; GO:0005515 | inferred from physical interaction with Fkbp39
FBgn0000427	dec-1	FastLMM	0	0	0	0	0	0	1		structural constituent of egg chorion ; GO:0005213 | inferred from mutant phenotype
FBgn0051708	DIP-zeta	FastLMM	0	0	0	0	0	0	1		-
FBgn0265066	lncRNA:CR44177	FastLMM	0	0	0	0	0	0	1		-
FBgn0265087	lncRNA:CR44198	FastLMM	0	0	0	0	0	0	1		-
FBgn0034282	Mapmodulin	FastLMM	0	0	0	0	0	0	1		histone binding ; GO:0042393 | inferred from biological aspect of ancestor with PANTHER:PTN000146830
FBgn0002901	mus304	FastLMM	0	0	0	0	0	0	1		-
FBgn0036801	MYPT-75D	FastLMM	0	0	0	0	0	0	1		protein phosphatase 1 binding ; GO:0008157 | inferred from biological aspect of ancestor with PANTHER:PTN000653145 <newline> myosin phosphatase regulator activity ; GO:0017020 | inferred from biological aspect of ancestor with PANTHER:PTN001194100 <newline> protein phosphatase 1 binding ; GO:0008157 | inferred from physical interaction with flw <newline> protein phosphatase regulator activity ; G…
FBgn0261858	Mzt1	FastLMM	0	0	0	0	0	0	1		gamma-tubulin binding ; GO:0043015 | inferred from direct assay
FBgn0259111	Ndae1	FastLMM	0	0	0	0	0	0	1		inorganic anion exchanger activity ; GO:0005452 | inferred from electronic annotation with InterPro:IPR001717, InterPro:IPR003020, InterPro:IPR003024 <newline> anion:anion antiporter activity ; GO:0015301 | inferred from direct assay <newline> sodium:bicarbonate symporter activity ; GO:0008510 | inferred from biological aspect of ancestor with PANTHER:PTN000155503 <newline> sodium:bicarbonate sym…
FBgn0015269	Nf1	FastLMM	0	0	0	0	0	0	1		GTPase activator activity ; GO:0005096 | inferred from direct assay
FBgn0260943	Rbp6	FastLMM	0	0	0	0	0	0	1		single-stranded RNA binding ; GO:0003727 | inferred from sequence or structural similarity with UniProtKB:Q920Q6 <newline> RNA binding ; GO:0003723 | inferred from biological aspect of ancestor with PANTHER:PTN002689974 <newline> poly(U) RNA binding ; GO:0008266 | inferred from sequence or structural similarity with UniProtKB:Q920Q6
FBgn0264707	RhoGEF3	FastLMM	0	0	0	0	0	0	1		Rho guanyl-nucleotide exchange factor activity ; GO:0005089 | inferred from sequence or structural similarity with GEFmeso
FBgn0036775	RpIIIC53	FastLMM	0	0	0	0	0	0	1		DNA binding ; GO:0003677 | inferred from electronic annotation with InterPro:IPR007811 <newline> DNA-directed 5'-3' RNA polymerase activity ; GO:0003899 | inferred from electronic annotation with InterPro:IPR007811
FBgn0016061	side	FastLMM	0	0	0	0	0	0	1		-
FBgn0085443	spri	FastLMM	0	0	0	0	0	0	1		protein kinase binding ; GO:0019901 | inferred from physical interaction with Abl <newline> receptor tyrosine kinase binding ; GO:0030971 | inferred from physical interaction with Egfr, Pvr <newline> guanyl-nucleotide exchange factor activity ; GO:0005085 | inferred from sequence or structural similarity with MGI:MGI:2444024 <newline> Ras GTPase binding ; GO:0017016 | inferred from physical inter…
FBgn0024836	stan	FastLMM	0	0	0	0	0	0	1		G protein-coupled receptor activity ; GO:0004930 | inferred from electronic annotation with InterPro:IPR000832, InterPro:IPR001879 <newline> calcium ion binding ; GO:0005509 | inferred from electronic annotation with InterPro:IPR001881, InterPro:IPR002126, InterPro:IPR015919 <newline> transmembrane signaling receptor activity ; GO:0004888 | non-traceable author statement <newline> cell adhesion m…
FBgn0266696	Svil	FastLMM	0	0	0	0	0	0	1		actin filament binding ; GO:0051015 | inferred from biological aspect of ancestor with PANTHER:PTN001736138
FBgn0015600	toc	FastLMM	0	0	0	0	0	0	1		microtubule binding ; GO:0008017 | inferred from biological aspect of ancestor with PANTHER:PTN001271408
FBgn0260486	Ziz	FastLMM	0	0	0	0	0	0	1		Rho guanyl-nucleotide exchange factor activity ; GO:0005089 | inferred from sequence or structural similarity with Zir
FBgn0001085	fz	FastLMM	0	0	0	0	1	0	1		Wnt-activated receptor activity ; GO:0042813 | inferred from direct assay <newline> Wnt-activated receptor activity ; GO:0042813 | inferred from biological aspect of ancestor with PANTHER:PTN000139394 <newline> Wnt-protein binding ; GO:0017147 | inferred from physical interaction with Wnt2, Wnt4, wg <newline> Wnt-protein binding ; GO:0017147 | inferred from biological aspect of ancestor with PANT…
FBgn0040207	kat80	FastLMM	0	0	0	0	1	0	1		microtubule binding ; GO:0008017 | inferred from electronic annotation with InterPro:IPR026962 <newline> microtubule-severing ATPase activity ; GO:0008568 | contributes_to inferred from biological aspect of ancestor with PANTHER:PTN000457152
FBgn0266696	Svil	FastLMM	0	0	0	0	1	0	1		actin filament binding ; GO:0051015 | inferred from biological aspect of ancestor with PANTHER:PTN001736138
FBgn0028644	beat-Ic	FastLMM	1	0	0	0	0	0	0		molecular_function ; GO:0003674 | no biological data available
FBgn0000250	cact	FastLMM	1	0	0	0	0	0	0		protein binding ; GO:0005515 | inferred from physical interaction with UniProtKB:Q9VR99 <newline> protein binding ; GO:0005515 | inferred from physical interaction with UniProtKB:Q9VEZ5 <newline> NF-kappaB binding ; GO:0051059 | inferred from physical interaction with Dif inferred from physical interaction with dl
FBgn0022943	Cbp20	FastLMM	1	0	0	0	0	0	0		mRNA binding ; GO:0003729 | inferred from sequence or structural similarity <newline> RNA cap binding ; GO:0000339 | inferred from biological aspect of ancestor with PANTHER:PTN000428749 <newline> protein binding ; GO:0005515 | inferred from physical interaction with UniProtKB:Q9V9K7
FBgn0032750	CG10495	FastLMM	1	0	0	0	0	0	0		flavin adenine dinucleotide binding ; GO:0050660 | inferred from electronic annotation with InterPro:IPR001269, InterPro:IPR018517 <newline> tRNA dihydrouridine synthase activity ; GO:0017150 | inferred from biological aspect of ancestor with PANTHER:PTN000118866
FBgn0032752	CG10702	FastLMM	1	0	0	0	0	0	0		ATP binding ; GO:0005524 | inferred from electronic annotation with InterPro:IPR006211 <newline> transmembrane receptor protein tyrosine kinase activity ; GO:0004714 | inferred from electronic annotation with InterPro:IPR006211
FBgn0039808	CG12071	FastLMM	1	0	0	0	0	0	0		DNA-binding transcription repressor activity, RNA polymerase II-specific ; GO:0001227 | inferred from sequence or structural similarity with UniProtKB:P27705 <newline> RNA polymerase II cis-regulatory region sequence-specific DNA binding ; GO:0000978 | inferred from sequence or structural similarity with UniProtKB:P27705
FBgn0038629	CG14304	FastLMM	1	0	0	0	0	0	0		chitin binding ; GO:0008061 | inferred from electronic annotation with InterPro:IPR002557
FBgn0029894	CG14440	FastLMM	1	0	0	0	0	0	0		-
FBgn0029895	CG14441	FastLMM	1	0	0	0	0	0	0		nucleic acid binding ; GO:0003676 | inferred from electronic annotation with InterPro:IPR013087 <newline> zinc ion binding ; GO:0008270 | inferred from electronic annotation with InterPro:IPR012934 <newline> molecular_function ; GO:0003674 | no biological data available
FBgn0037125	CG14573	FastLMM	1	0	0	0	0	0	0		-
FBgn0039806	CG15545	FastLMM	1	0	0	0	0	0	0		molecular_function ; GO:0003674 | no biological data available
FBgn0032751	CG17343	FastLMM	1	0	0	0	0	0	0		-
FBgn0033802	CG17724	FastLMM	1	0	0	0	0	0	0		structural constituent of nuclear pore ; GO:0017056 | inferred from electronic annotation with InterPro:IPR037637
FBgn0028899	CG31817	FastLMM	1	0	0	0	0	0	0		molecular_function ; GO:0003674 | no biological data available
FBgn0264979	CG4267	FastLMM	1	0	0	0	0	0	0		carboxylic ester hydrolase activity ; GO:0052689 | inferred from electronic annotation with InterPro:IPR000734 <newline> lipase activity ; GO:0016298 | inferred from sequence or structural similarity with MGI:MGI:96820 <newline> lipase activity ; GO:0016298 | inferred from biological aspect of ancestor with PANTHER:PTN000176726
FBgn0263846	CG43707	FastLMM	1	0	0	0	0	0	0		-
FBgn0038588	CG7156	FastLMM	1	0	0	0	0	0	0		ATP binding ; GO:0005524 | inferred from electronic annotation with InterPro:IPR000719 <newline> phosphatidylinositol binding ; GO:0035091 | inferred from electronic annotation with InterPro:IPR001683 <newline> protein serine/threonine kinase activity ; GO:0004674 | inferred from sequence or structural similarity with JIL-1
FBgn0038571	CG7215	FastLMM	1	0	0	0	0	0	0		-
FBgn0035703	CG8270	FastLMM	1	0	0	0	0	0	0		-
FBgn0000635	Fas2	FastLMM	1	0	0	0	0	0	0		cell-cell adhesion mediator activity ; GO:0098632 | inferred from biological aspect of ancestor with PANTHER:PTN001296633 <newline> protein binding ; GO:0005515 | inferred from physical interaction with Appl
FBgn0031829	IFT52	FastLMM	1	0	0	0	0	0	0		molecular_function ; GO:0003674 | no biological data available
FBgn0011225	jar	FastLMM	1	0	0	0	0	0	0		microtubule binding ; GO:0008017 | inferred from direct assay <newline> actin filament binding ; GO:0051015 | inferred from direct assay <newline> ATP binding ; GO:0005524 | inferred from electronic annotation with InterPro:IPR001609, InterPro:IPR004009 <newline> protein binding ; GO:0005515 | inferred from physical interaction with mira <newline> protein binding ; GO:0005515 | inferred from phys…
FBgn0039350	jigr1	FastLMM	1	0	0	0	0	0	0		transcription regulatory region sequence-specific DNA binding ; GO:0000976 | inferred from sequence model with InterPro:IPR006578
FBgn0053182	Kdm4B	FastLMM	1	0	0	0	0	0	0		histone demethylase activity ; GO:0032452 | inferred from biological aspect of ancestor with PANTHER:PTN000075014 <newline> histone demethylase activity (H3-K9 specific) ; GO:0032454 | inferred from mutant phenotype <newline> histone demethylase activity (H3-K36 specific) ; GO:0051864 | inferred from sequence or structural similarity with UniProtKB:O75164 <newline> histone demethylase activity (H…
FBgn0017590	klg	FastLMM	1	0	0	0	0	0	0		axon guidance receptor activity ; GO:0008046 | inferred from biological aspect of ancestor with PANTHER:PTN002895063
FBgn0261638	lncRNA:CR42721	FastLMM	1	0	0	0	0	0	0		-
FBgn0261927	lncRNA:CR42794	FastLMM	1	0	0	0	0	0	0		-
FBgn0262106	lncRNA:CR42859	FastLMM	1	0	0	0	0	0	0		-
FBgn0264480	lncRNA:CR43888	FastLMM	1	0	0	0	0	0	0		-
FBgn0025815	Mcm6	FastLMM	1	0	0	0	0	0	0		ATP binding ; GO:0005524 | inferred from electronic annotation with InterPro:IPR001208, InterPro:IPR008049, InterPro:IPR018525 <newline> single-stranded DNA binding ; GO:0003697 | inferred from biological aspect of ancestor with PANTHER:PTN000179711 <newline> 3'-5' DNA helicase activity ; GO:0043138 | contributes_to inferred from direct assay <newline> single-stranded 3'-5' DNA helicase activity …
FBgn0262388	mir-92b	FastLMM	1	0	0	0	0	0	0		-
FBgn0029888	ND-ASHI	FastLMM	1	0	0	0	0	0	0		NADH dehydrogenase (ubiquinone) activity ; GO:0008137 | inferred from electronic annotation with InterPro:IPR008699, InterPro:IPR016551 <newline> NADH dehydrogenase activity ; GO:0003954 | inferred from sequence or structural similarity with UniProtKB:O95169
FBgn0029881	pigs	FastLMM	1	0	0	0	0	0	0		actin filament binding ; GO:0051015 | inferred from biological aspect of ancestor with PANTHER:PTN005319067 <newline> microtubule binding ; GO:0008017 | inferred from biological aspect of ancestor with PANTHER:PTN005319067 <newline> cytoskeletal anchor activity ; GO:0008093 | inferred from biological aspect of ancestor with PANTHER:PTN005319067
FBgn0038570	Prx5	FastLMM	1	0	0	0	0	0	0		thioredoxin peroxidase activity ; GO:0008379 | inferred from mutant phenotype <newline> thioredoxin peroxidase activity ; GO:0008379 | inferred from biological aspect of ancestor with PANTHER:PTN001625584
FBgn0263974	qin	FastLMM	1	0	0	0	0	0	0		ubiquitin-protein transferase activity ; GO:0004842 | inferred from sequence or structural similarity with MGI:MGI:2685973 <newline> zinc ion binding ; GO:0008270 | inferred from electronic annotation with InterPro:IPR000315, InterPro:IPR001841 <newline> zinc ion binding ; GO:0008270 | inferred from sequence model
FBgn0036921	RhoGDI	FastLMM	1	0	0	0	0	0	0		Rho GDP-dissociation inhibitor activity ; GO:0005094 | inferred from biological aspect of ancestor with PANTHER:PTN000104723 <newline> Rac GTPase binding ; GO:0048365 | inferred from biological aspect of ancestor with PANTHER:PTN000104723
FBgn0028991	seq	FastLMM	1	0	0	0	0	0	0		nucleic acid binding ; GO:0003676 | inferred from electronic annotation with InterPro:IPR013087 <newline> myosin II head/neck binding ; GO:0032034 | inferred from biological aspect of ancestor with PANTHER:PTN000399552
FBgn0029761	SK	FastLMM	1	0	0	0	0	0	0		photoreceptor activity ; GO:0009881 | inferred from direct assay <newline> calmodulin binding ; GO:0005516 | inferred from biological aspect of ancestor with PANTHER:PTN000016262 <newline> small conductance calcium-activated potassium channel activity ; GO:0016286 | inferred from biological aspect of ancestor with PANTHER:PTN000016262 <newline> small conductance calcium-activated potassium channe…
FBgn0032840	sNPF	FastLMM	1	0	0	0	0	0	0		neuropeptide receptor binding ; GO:0071855 | inferred from physical interaction with sNPF-R <newline> neuropeptide hormone activity ; GO:0005184 | inferred from direct assay
FBgn0029768	SPR	FastLMM	1	0	0	0	0	0	0		G protein-coupled peptide receptor activity ; GO:0008528 | inferred from physical interaction with SP, Mip, Dup99B <newline> G protein-coupled peptide receptor activity ; GO:0008528 | inferred from physical interaction with SP
FBgn0036373	Tgi	FastLMM	1	0	0	0	0	0	0		transcription coactivator binding ; GO:0001223 | inferred from biological aspect of ancestor with PANTHER:PTN001049299 <newline> transcription factor binding ; GO:0008134 | inferred from physical interaction with sd <newline> transcription coactivator binding ; GO:0001223 | inferred from physical interaction with yki
FBgn0037487	thw	FastLMM	1	0	0	0	0	0	0		chitin binding ; GO:0008061 | inferred from electronic annotation with InterPro:IPR002557
FBgn0051721	Trim9	FastLMM	1	0	0	0	0	0	0		protein binding ; GO:0005515 | inferred from physical interaction with UniProtKB:A1Z920 inferred from physical interaction with UniProtKB:Q9VWB7 <newline> zinc ion binding ; GO:0008270 | inferred from electronic annotation with InterPro:IPR000315, InterPro:IPR001841 <newline> zinc ion binding ; GO:0008270 | inferred from sequence model <newline> ubiquitin protein ligase activity ; GO:0061630 | in…
FBgn0085410	TrissinR	FastLMM	1	0	0	0	0	0	0		neuropeptide receptor activity ; GO:0008188 | inferred from sequence model <newline> G protein-coupled peptide receptor activity ; GO:0008528 | inferred from physical interaction with Trissin <newline> peptide binding ; GO:0042277 | inferred from biological aspect of ancestor with PANTHER:PTN001202348 <newline> G protein-coupled receptor activity ; GO:0004930 | inferred from biological aspect of …
FBgn0025726	unc-13	FastLMM	1	0	0	0	0	0	0		diacylglycerol binding ; GO:0019992 | inferred from electronic annotation with InterPro:IPR027080 <newline> calmodulin binding ; GO:0005516 | inferred from biological aspect of ancestor with PANTHER:PTN000826129 <newline> calmodulin binding ; GO:0005516 | traceable author statement <newline> phospholipid binding ; GO:0005543 | inferred from electronic annotation with InterPro:IPR037302 <newline> …
FBgn0003963	ush	FastLMM	1	0	0	0	0	0	0		nucleic acid binding ; GO:0003676 | inferred from electronic annotation with InterPro:IPR013087 <newline> RNA polymerase II transcription factor binding ; GO:0001085 | inferred from biological aspect of ancestor with PANTHER:PTN000311050 <newline> protein binding ; GO:0005515 | inferred from physical interaction with srp <newline> transcription factor binding ; GO:0008134 | inferred from mutant p…
FBgn0004607	zfh2	FastLMM	1	0	0	0	0	0	0		transcription regulatory region sequence-specific DNA binding ; GO:0000976 | inferred from biological aspect of ancestor with PANTHER:PTN000654739 <newline> RNA polymerase II cis-regulatory region sequence-specific DNA binding ; GO:0000978 | inferred from biological aspect of ancestor with PANTHER:PTN000654739 <newline> RNA polymerase II regulatory region sequence-specific DNA binding ; GO:000097…
FBgn0029922	CG14431	FastLMM	1	0	0	0	1	0	0		-
FBgn0015609	CadN	FastLMM	1	0	0	0	0	1	0		cadherin binding ; GO:0045296 | inferred from physical interaction with CadN <newline> calcium ion binding ; GO:0005509 | inferred from biological aspect of ancestor with PANTHER:PTN001931974 <newline> protein homodimerization activity ; GO:0042803 | inferred from physical interaction with CadN <newline> protein binding ; GO:0005515 | inferred from physical interaction with UniProtKB:P18824-2 <ne…
FBgn0016059	Sema1b	FastLMM	1	0	0	0	0	0	1		semaphorin receptor binding ; GO:0030215 | inferred from biological aspect of ancestor with PANTHER:PTN000112368 <newline> chemorepellent activity ; GO:0045499 | inferred from biological aspect of ancestor with PANTHER:PTN000867340
FBgn0086361	alph	FastLMM	0	1	0	0	0	0	0		manganese ion binding ; GO:0030145 | inferred from electronic annotation with InterPro:IPR012911 <newline> magnesium ion binding ; GO:0000287 | inferred from electronic annotation with InterPro:IPR012911 <newline> magnesium-dependent protein serine/threonine phosphatase activity ; GO:0004724 | inferred from biological aspect of ancestor with PANTHER:PTN000352745 <newline> protein serine/threonine…
FBgn0030666	CG12708	FastLMM	0	1	0	0	0	0	0		-
FBgn0039844	CG1607	FastLMM	0	1	0	0	0	0	0		amino acid transmembrane transporter activity ; GO:0015171 | inferred from sequence or structural similarity with Eaat1 <newline> L-amino acid transmembrane transporter activity ; GO:0015179 | inferred from biological aspect of ancestor with PANTHER:PTN000208507
FBgn0051226	CG31226	FastLMM	0	1	0	0	0	0	0		molecular_function ; GO:0003674 | no biological data available
FBgn0051663	CG31663	FastLMM	0	1	0	0	0	0	0		-
FBgn0051898	CG31898	FastLMM	0	1	0	0	0	0	0		molecular_function ; GO:0003674 | no biological data available
FBgn0052521	CG32521	FastLMM	0	1	0	0	0	0	0		-
FBgn0250757	CG42235	FastLMM	0	1	0	0	0	0	0		symporter activity ; GO:0015293 | inferred from biological aspect of ancestor with PANTHER:PTN000213468
FBgn0261566	CG42680	FastLMM	0	1	0	0	0	0	0		molecular_function ; GO:0003674 | no biological data available
FBgn0262356	CG43054	FastLMM	0	1	0	0	0	0	0		molecular_function ; GO:0003674 | no biological data available
FBgn0030398	Cpr11B	FastLMM	0	1	0	0	0	0	0		structural constituent of cuticle ; GO:0042302 | inferred from electronic annotation with InterPro:IPR000618 <newline> structural constituent of chitin-based larval cuticle ; GO:0008010 | inferred from sequence model
FBgn0039286	dan	FastLMM	0	1	0	0	0	0	0		DNA binding ; GO:0003677 | inferred from electronic annotation with InterPro:IPR007889, InterPro:IPR009057 <newline> DNA-binding transcription factor activity ; GO:0003700 | inferred from mutant phenotype <newline> protein binding ; GO:0005515 | inferred from physical interaction with UniProtKB:O18381 inferred from physical interaction with UniProtKB:Q24027 inferred from physical interaction with…
FBgn0260003	Dys	FastLMM	0	1	0	0	0	0	0		zinc ion binding ; GO:0008270 | inferred from electronic annotation with InterPro:IPR000433 <newline> WW domain binding ; GO:0050699 | inferred from physical interaction with Dg <newline> structural constituent of muscle ; GO:0008307 | inferred from sequence or structural similarity with HGNC:12635 inferred from sequence or structural similarity with HGNC:2928 inferred from sequence or structural…
FBgn0004652	fru	FastLMM	0	1	0	0	0	0	0		nucleic acid binding ; GO:0003676 | inferred from electronic annotation with InterPro:IPR013087 <newline> DNA-binding transcription factor activity ; GO:0003700 | non-traceable author statement <newline> DNA-binding transcription factor activity ; GO:0003700 | traceable author statement
FBgn0001084	fy	FastLMM	0	1	0	0	0	0	0		-
FBgn0264542	hwt	FastLMM	0	1	0	0	0	0	0		phosphotyrosine residue binding ; GO:0001784 | inferred from biological aspect of ancestor with PANTHER:PTN001031645
FBgn0001257	ImpL2	FastLMM	0	1	0	0	0	0	0		insulin binding ; GO:0043559 | inferred from physical interaction with Ilp5 <newline> insulin binding ; GO:0043559 | inferred from physical interaction with Ilp2 inferred from physical interaction with Ilp6 inferred from physical interaction with Ilp5 inferred from physical interaction with Ilp4 inferred from physical interaction with Ilp1 <newline> cell-cell adhesion mediator activity ; GO:00986…
FBgn0020642	Lcp65Ac	FastLMM	0	1	0	0	0	0	0		structural constituent of cuticle ; GO:0042302 | inferred from electronic annotation with InterPro:IPR000618 <newline> structural constituent of chitin-based larval cuticle ; GO:0008010 | inferred from sequence or structural similarity <newline> structural constituent of chitin-based larval cuticle ; GO:0008010 | inferred from sequence model
FBgn0020641	Lcp65Ad	FastLMM	0	1	0	0	0	0	0		structural constituent of cuticle ; GO:0042302 | inferred from electronic annotation with InterPro:IPR000618 <newline> structural constituent of chitin-based larval cuticle ; GO:0008010 | inferred from sequence model <newline> structural constituent of chitin-based larval cuticle ; GO:0008010 | inferred from sequence or structural similarity
FBgn0002023	Lim3	FastLMM	0	1	0	0	0	0	0		sequence-specific DNA binding ; GO:0043565 | inferred from electronic annotation with InterPro:IPR017970
FBgn0264884	lncRNA:CR44075	FastLMM	0	1	0	0	0	0	0		-
FBgn0083946	lobo	FastLMM	0	1	0	0	0	0	0		molecular_function ; GO:0003674 | no biological data available
FBgn0040765	luna	FastLMM	0	1	0	0	0	0	0		transcription regulatory region sequence-specific DNA binding ; GO:0000976 | inferred from biological aspect of ancestor with PANTHER:PTN004619861 <newline> DNA-binding transcription factor activity, RNA polymerase II-specific ; GO:0000981 | inferred from biological aspect of ancestor with PANTHER:PTN004619861 <newline> sequence-specific DNA binding ; GO:0043565 | inferred from direct assay
FBgn0259734	Nost	FastLMM	0	1	0	0	0	0	0		lipid binding ; GO:0008289 | inferred from direct assay <newline> phospholipid binding ; GO:0005543 | inferred from sequence model
FBgn0027601	pdgy	FastLMM	0	1	0	0	0	0	0		long-chain fatty acid-CoA ligase activity ; GO:0004467 | inferred from direct assay <newline> long-chain fatty acid-CoA ligase activity ; GO:0004467 | inferred from biological aspect of ancestor with PANTHER:PTN002787833 <newline> CoA-ligase activity ; GO:0016405 | inferred from biological aspect of ancestor with PANTHER:PTN001186584
FBgn0004595	pros	FastLMM	0	1	0	0	0	0	0		DNA binding ; GO:0003677 | inferred from direct assay <newline> DNA-binding transcription factor activity ; GO:0003700 | non-traceable author statement <newline> DNA-binding transcription repressor activity, RNA polymerase II-specific ; GO:0001227 | inferred from mutant phenotype <newline> DNA-binding transcription factor activity ; GO:0003700 | inferred from mutant phenotype <newline> DNA-bindin…
FBgn0285917	sbb	FastLMM	0	1	0	0	0	0	0		nucleic acid binding ; GO:0003676 | inferred from electronic annotation with InterPro:IPR013087 <newline> transcription corepressor activity ; GO:0003714 | inferred from direct assay
FBgn0005613	Sox15	FastLMM	0	1	0	0	0	0	0		DNA-binding transcription factor activity, RNA polymerase II-specific ; GO:0000981 | inferred from biological aspect of ancestor with PANTHER:PTN000030384
FBgn0031187	Usp2	FastLMM	0	1	0	0	0	0	0		Lys48-specific deubiquitinase activity ; GO:1990380 | inferred from direct assay <newline> thiol-dependent ubiquitin-specific protease activity ; GO:0004843 | inferred from sequence or structural similarity with HGNC:12631 <newline> proteasome binding ; GO:0070628 | inferred from physical interaction with Rpt6
FBgn0259789	zld	FastLMM	0	1	0	0	0	0	0		sequence-specific DNA binding ; GO:0043565 | inferred from direct assay <newline> protein binding ; GO:0005515 | inferred from physical interaction with bi <newline> transcription regulatory region sequence-specific DNA binding ; GO:0000976 | inferred from direct assay
FBgn0263930	dally	FastLMM	0	1	0	0	0	0	1		protein binding ; GO:0005515 | inferred from physical interaction with dpp
FBgn0010905	Spn	FastLMM	1	1	0	0	0	0	0		neurexin family protein binding ; GO:0042043 | inferred from physical interaction with Nrx-1 <newline> actin filament binding ; GO:0051015 | inferred from biological aspect of ancestor with PANTHER:PTN000414425
FBgn0032111	CG13110	FastLMM	0	0	1	0	0	0	0		-
FBgn0034942	CG13566	FastLMM	0	0	1	0	0	0	0		molecular_function ; GO:0003674 | no biological data available
FBgn0040496	CG17104	FastLMM	0	0	1	0	0	0	0		-
FBgn0050275	CG30275	FastLMM	0	0	1	0	0	0	0		oxidoreductase activity ; GO:0016491 | inferred from electronic annotation with InterPro:IPR023753
FBgn0052354	CG32354	FastLMM	0	0	1	0	0	0	0		-
FBgn0285970	CG32500	FastLMM	0	0	1	0	0	0	0		iron-sulfur cluster binding ; GO:0051536 | inferred from electronic annotation with InterPro:IPR001075 <newline> iron ion binding ; GO:0005506 | inferred from electronic annotation with InterPro:IPR001075
FBgn0052507	CG32507	FastLMM	0	0	1	0	0	0	0		molecular_function ; GO:0003674 | no biological data available
FBgn0085319	CG34290	FastLMM	0	0	1	0	0	0	0		serine-type endopeptidase activity ; GO:0004252 | inferred from electronic annotation with InterPro:IPR001254, InterPro:IPR001314, InterPro:IPR018114 <newline> serine-type endopeptidase activity ; GO:0004252 | inferred from sequence model
FBgn0261637	CG42720	FastLMM	0	0	1	0	0	0	0		-
FBgn0263082	CG43350	FastLMM	0	0	1	0	0	0	0		serine-type endopeptidase inhibitor activity ; GO:0004867 | inferred from electronic annotation with InterPro:IPR002223
FBgn0039064	CG4467	FastLMM	0	0	1	0	0	0	0		metalloaminopeptidase activity ; GO:0070006 | inferred from biological aspect of ancestor with PANTHER:PTN000164250 <newline> peptide binding ; GO:0042277 | inferred from biological aspect of ancestor with PANTHER:PTN000164250 <newline> zinc ion binding ; GO:0008270 | inferred from biological aspect of ancestor with PANTHER:PTN000164250
FBgn0039178	CG6356	FastLMM	0	0	1	0	0	0	0		transmembrane transporter activity ; GO:0022857 | inferred from electronic annotation with InterPro:IPR005828
FBgn0031010	CG8028	FastLMM	0	0	1	0	0	0	0		monocarboxylic acid transmembrane transporter activity ; GO:0008028 | inferred from biological aspect of ancestor with PANTHER:PTN000888455
FBgn0031011	CG8034	FastLMM	0	0	1	0	0	0	0		monocarboxylic acid transmembrane transporter activity ; GO:0008028 | inferred from biological aspect of ancestor with PANTHER:PTN000888455
FBgn0034674	CG9304	FastLMM	0	0	1	0	0	0	0		-
FBgn0020307	dve	FastLMM	0	0	1	0	0	0	0		DNA-binding transcription factor activity ; GO:0003700 | inferred from sequence or structural similarity with vvl <newline> RNA polymerase II regulatory region sequence-specific DNA binding ; GO:0000977 | inferred from biological aspect of ancestor with PANTHER:PTN000387730 <newline> DNA-binding transcription factor activity ; GO:0003700 | traceable author statement
FBgn0026439	Eaat1	FastLMM	0	0	1	0	0	0	0		L-glutamate transmembrane transporter activity ; GO:0005313 | inferred from direct assay <newline> glutamate:sodium symporter activity ; GO:0015501 | inferred from direct assay <newline> L-aspartate transmembrane transporter activity ; GO:0015183 | inferred from direct assay <newline> glutamate:sodium symporter activity ; GO:0015501 | inferred from sequence or structural similarity
FBgn0264078	Flo2	FastLMM	0	0	1	0	0	0	0		structural molecule activity ; GO:0005198 | non-traceable author statement
FBgn0035385	FMRFaR	FastLMM	0	0	1	0	0	0	0		neuropeptide receptor activity ; GO:0008188 | inferred from physical interaction with FMRFa <newline> peptide receptor activity ; GO:0001653 | inferred from direct assay <newline> G protein-coupled receptor activity ; GO:0004930 | inferred from sequence or structural similarity <newline> neuropeptide receptor activity ; GO:0008188 | inferred from sequence model
FBgn0041240	Gr57a	FastLMM	0	0	1	0	0	0	0		sweet taste receptor activity ; GO:0033041 | inferred from biological aspect of ancestor with PANTHER:PTN002501461 <newline> taste receptor activity ; GO:0008527 | non-traceable author statement <newline> bitter taste receptor activity ; GO:0033038 | inferred from biological aspect of ancestor with PANTHER:PTN002501461
FBgn0041237	Gr58c	FastLMM	0	0	1	0	0	0	0		taste receptor activity ; GO:0008527 | non-traceable author statement
FBgn0010113	hdc	FastLMM	0	0	1	0	0	0	0		-
FBgn0086347	Myo31DF	FastLMM	0	0	1	0	0	0	0		ATP binding ; GO:0005524 | inferred from electronic annotation with InterPro:IPR001609 <newline> actin-dependent ATPase activity ; GO:0030898 | inferred from mutant phenotype <newline> actin filament binding ; GO:0051015 | inferred from biological aspect of ancestor with PANTHER:PTN000320364 <newline> actin-dependent ATPase activity ; GO:0030898 | inferred from biological aspect of ancestor with …
FBgn0264975	Nrg	FastLMM	0	0	1	0	0	0	0		cell adhesion molecule binding ; GO:0050839 | inferred from physical interaction with ed <newline> calcium ion binding ; GO:0005509 | inferred from direct assay
FBgn0003301	rut	FastLMM	0	0	1	0	0	0	0		calcium- and calmodulin-responsive adenylate cyclase activity ; GO:0008294 | inferred from direct assay inferred from mutant phenotype <newline> adenylate cyclase activity ; GO:0004016 | inferred from biological aspect of ancestor with PANTHER:PTN002899368
FBgn0011834	Ser6	FastLMM	0	0	1	0	0	0	0		serine-type endopeptidase activity ; GO:0004252 | inferred from sequence model <newline> serine-type endopeptidase activity ; GO:0004252 | inferred from biological aspect of ancestor with PANTHER:PTN001208729
FBgn0039594	snu	FastLMM	0	0	1	0	0	0	0		ATPase activity ; GO:0016887 | inferred from electronic annotation with InterPro:IPR003439, InterPro:IPR017871 <newline> ATP binding ; GO:0005524 | inferred from electronic annotation with InterPro:IPR003439, InterPro:IPR017871
FBgn0265356	tn	FastLMM	0	0	1	0	0	0	0		ubiquitin-protein transferase activity ; GO:0004842 | inferred from sequence or structural similarity with HGNC:16380 <newline> ubiquitin protein ligase activity ; GO:0061630 | inferred from biological aspect of ancestor with PANTHER:PTN001188366 <newline> metal ion binding ; GO:0046872 | inferred from electronic annotation with InterPro:IPR018957 <newline> zinc ion binding ; GO:0008270 | inferre…
FBgn0030354	Upf1	FastLMM	0	0	1	0	0	0	0		ATP binding ; GO:0005524 | inferred from electronic annotation with InterPro:IPR018999 <newline> DNA binding ; GO:0003677 | inferred from electronic annotation with InterPro:IPR018999 <newline> zinc ion binding ; GO:0008270 | inferred from electronic annotation with InterPro:IPR018999 <newline> RNA binding ; GO:0003723 | inferred from biological aspect of ancestor with PANTHER:PTN000094509 <newli…
FBgn0260780	wisp	FastLMM	0	0	1	0	0	0	0		polynucleotide adenylyltransferase activity ; GO:0004652 | inferred from sequence or structural similarity with WB:WBGene00001596 <newline> polynucleotide adenylyltransferase activity ; GO:0004652 | inferred from direct assay <newline> nucleotidyltransferase activity ; GO:0016779 | inferred from biological aspect of ancestor with PANTHER:PTN000263330 <newline> polynucleotide adenylyltransferase a…
FBgn0016119	ATPsynCF6	FastLMM	0	0	0	1	0	0	0		proton transmembrane transporter activity ; GO:0015078 | inferred from electronic annotation with InterPro:IPR008387, InterPro:IPR016349 <newline> ATPase activity ; GO:0016887 | contributes_to inferred from sequence or structural similarity with HGNC:847
FBgn0085385	bma	FastLMM	0	0	0	1	0	0	0		ATP binding ; GO:0005524 | inferred from electronic annotation with InterPro:IPR000719 <newline> protein kinase activity ; GO:0004672 | NOT inferred from sequence or structural similarity with UniProtKB:Q9VAR0 <newline> molecular_function ; GO:0003674 | no biological data available
FBgn0039094	CG10184	FastLMM	0	0	0	1	0	0	0		L-allo-threonine aldolase activity ; GO:0008732 | inferred from biological aspect of ancestor with PANTHER:PTN000033149
FBgn0032109	CG17005	FastLMM	0	0	0	1	0	0	0		-
FBgn0031127	CG1835	FastLMM	0	0	0	1	0	0	0		-
FBgn0052537	CG32537	FastLMM	0	0	0	1	0	0	0		molecular_function ; GO:0003674 | no biological data available
FBgn0263258	chas	FastLMM	0	0	0	1	0	0	0		molecular_function ; GO:0003674 | no biological data available
FBgn0033292	Cyp4ad1	FastLMM	0	0	0	1	0	0	0		oxidoreductase activity, acting on paired donors, with incorporation or reduction of molecular oxygen ; GO:0016705 | inferred from electronic annotation with InterPro:IPR001128, InterPro:IPR002401, InterPro:IPR017972 <newline> heme binding ; GO:0020037 | inferred from electronic annotation with InterPro:IPR001128, InterPro:IPR002401 <newline> iron ion binding ; GO:0005506 | inferred from electron…
FBgn0034072	Dg	FastLMM	0	0	0	1	0	0	0		calcium ion binding ; GO:0005509 | inferred from electronic annotation with InterPro:IPR015919 <newline> structural constituent of muscle ; GO:0008307 | inferred from sequence or structural similarity with HGNC:2666 <newline> protein binding ; GO:0005515 | inferred from physical interaction with UniProtKB:Q0KI50 inferred from physical interaction with UniProtKB:Q7YU29 inferred from physical inter…
FBgn0000562	egl	FastLMM	0	0	0	1	0	0	0		mRNA binding ; GO:0003729 | inferred from direct assay <newline> 3'-5' exonuclease activity ; GO:0008408 | inferred from electronic annotation with InterPro:IPR002562
FBgn0027086	IleRS	FastLMM	0	0	0	1	0	0	0		ATP binding ; GO:0005524 | inferred from electronic annotation with InterPro:IPR001412, InterPro:IPR002300, InterPro:IPR002301, InterPro:IPR009080 <newline> aminoacyl-tRNA editing activity ; GO:0002161 | inferred from electronic annotation with InterPro:IPR009008 <newline> isoleucine-tRNA ligase activity ; GO:0004822 | inferred from biological aspect of ancestor with PANTHER:PTN002449689 <newline…
FBgn0002535	Lcp4	FastLMM	0	0	0	1	0	0	0		structural constituent of chitin-based larval cuticle ; GO:0008010 | inferred from direct assay <newline> structural constituent of chitin-based larval cuticle ; GO:0008010 | inferred from sequence model
FBgn0020556	lncRNA:bxd	FastLMM	0	0	0	1	0	0	0		-
FBgn0263501	lncRNA:CR43490	FastLMM	0	0	0	1	0	0	0		-
FBgn0086778	nAChRalpha7	FastLMM	0	0	0	1	0	0	0		neurotransmitter receptor activity ; GO:0030594 | inferred from biological aspect of ancestor with PANTHER:PTN000434994 <newline> acetylcholine-gated cation-selective channel activity ; GO:0022848 | inferred from direct assay <newline> transmembrane signaling receptor activity ; GO:0004888 | inferred from electronic annotation with InterPro:IPR006201 <newline> acetylcholine-gated cation-selective…
FBgn0266377	Pde8	FastLMM	0	0	0	1	0	0	0		3',5'-cyclic-nucleotide phosphodiesterase activity ; GO:0004114 | inferred from electronic annotation with InterPro:IPR002073 <newline> 3',5'-cyclic-AMP phosphodiesterase activity ; GO:0004115 | inferred from sequence model
FBgn0265778	PDZ-GEF	FastLMM	0	0	0	1	0	0	0		Rap guanyl-nucleotide exchange factor activity ; GO:0017034 | inferred from sequence or structural similarity with HGNC:16854 <newline> Ras GTPase binding ; GO:0017016 | inferred from physical interaction with Rap1 <newline> Rap guanyl-nucleotide exchange factor activity ; GO:0017034 | inferred from direct assay
FBgn0003086	Pig1	FastLMM	0	0	0	1	0	0	0		molecular_function ; GO:0003674 | no biological data available
FBgn0036147	Plod	FastLMM	0	0	0	1	0	0	0		procollagen-lysine 5-dioxygenase activity ; GO:0008475 | inferred from biological aspect of ancestor with PANTHER:PTN000842962 <newline> procollagen-lysine 5-dioxygenase activity ; GO:0008475 | inferred from sequence or structural similarity with UniProtKB:Q02809 <newline> L-ascorbic acid binding ; GO:0031418 | inferred from electronic annotation with InterPro:IPR006620 <newline> iron ion binding…
FBgn0038946	rdhB	FastLMM	0	0	0	1	0	0	0		retinol dehydrogenase activity ; GO:0004745 | inferred from mutant phenotype
FBgn0264493	rdx	FastLMM	0	0	0	1	0	0	0		ubiquitin protein ligase binding ; GO:0031625 | inferred from biological aspect of ancestor with PANTHER:PTN000698163 <newline> protein binding ; GO:0005515 | inferred from physical interaction with UniProtKB:P19538 inferred from physical interaction with UniProtKB:Q9V475 <newline> protein homodimerization activity ; GO:0042803 | inferred from direct assay <newline> protein binding ; GO:0005515 |…
FBgn0024509	Sec13	FastLMM	0	0	0	1	0	0	0		structural molecule activity ; GO:0005198 | inferred from sequence or structural similarity with SGD:S000004198 <newline> chromatin binding ; GO:0003682 | inferred from direct assay inferred from mutant phenotype
FBgn0003374	Sgs4	FastLMM	0	0	0	1	0	0	0		-
FBgn0261698	SLO2	FastLMM	0	0	0	1	0	0	0		calcium-activated potassium channel activity ; GO:0015269 | inferred from sequence or structural similarity with slo <newline> intracellular sodium activated potassium channel activity ; GO:0005228 | inferred from biological aspect of ancestor with PANTHER:PTN000798363 <newline> outward rectifier potassium channel activity ; GO:0015271 | inferred from biological aspect of ancestor with PANTHER:PT…
FBgn0039232	sosie	FastLMM	0	0	0	1	0	0	0		-
FBgn0051143	tRNA:Leu-CAA-2-3	FastLMM	0	0	0	1	0	0	0		UUG codon-amino acid adaptor activity ; GO:0033404 | inferred from sequence model
FBgn0002941	slou	FastLMM	0	0	0	1	1	0	0		DNA-binding transcription factor activity ; GO:0003700 | inferred from biological aspect of ancestor with PANTHER:PTN000678271 <newline> RNA polymerase II cis-regulatory region sequence-specific DNA binding ; GO:0000978 | inferred from biological aspect of ancestor with PANTHER:PTN000678271 <newline> sequence-specific DNA binding ; GO:0043565 | inferred from biological aspect of ancestor with PAN…
FBgn0259146	fid	FastLMM	0	0	0	1	0	0	1		tRNA (uracil) methyltransferase activity ; GO:0016300 | inferred from biological aspect of ancestor with PANTHER:PTN000317053
FBgn0262582	cic	FastLMM	0	1	0	1	0	0	0		DNA-binding transcription repressor activity, RNA polymerase II-specific ; GO:0001227 | inferred from mutant phenotype <newline> repressing transcription factor binding ; GO:0070491 | inferred from physical interaction with gro <newline> RNA polymerase II regulatory region sequence-specific DNA binding ; GO:0000977 | inferred from direct assay <newline> sequence-specific DNA binding ; GO:0043565 …
FBgn0013995	Calx	FastLMM	0	0	1	1	0	0	0		calcium ion binding ; GO:0005509 | inferred from direct assay <newline> calcium:sodium antiporter activity ; GO:0005432 | inferred from direct assay <newline> calcium:sodium antiporter activity ; GO:0005432 | traceable author statement <newline> calcium:sodium antiporter activity ; GO:0005432 | inferred from mutant phenotype
FBgn0039088	CG10164	FastLMM	0	0	1	1	0	0	0		molecular_function ; GO:0003674 | no biological data available
FBgn0036837	CG18135	FastLMM	0	0	1	1	0	0	0		starch binding ; GO:2001070 | inferred from electronic annotation with InterPro:IPR002044 <newline> glycerophosphocholine phosphodiesterase activity ; GO:0047389 | inferred from biological aspect of ancestor with PANTHER:PTN001120996 <newline> myosin binding ; GO:0017022 | inferred from physical interaction with Myo10A
FBgn0053658	CG33658	FastLMM	0	0	1	1	0	0	0		molecular_function ; GO:0003674 | no biological data available
FBgn0262839	CG43203	FastLMM	0	0	1	1	0	0	0		molecular_function ; GO:0003674 | no biological data available
FBgn0039347	CG5071	FastLMM	0	0	1	1	0	0	0		zinc ion binding ; GO:0008270 | inferred from electronic annotation with InterPro:IPR000315, InterPro:IPR001841 <newline> zinc ion binding ; GO:0008270 | inferred from sequence model <newline> cyclosporin A binding ; GO:0016018 | inferred from biological aspect of ancestor with PANTHER:PTN002594282 <newline> peptidyl-prolyl cis-trans isomerase activity ; GO:0003755 | inferred from biological aspe…
FBgn0263257	Cngl	FastLMM	0	0	1	1	0	0	0		intracellular cyclic nucleotide activated cation channel activity ; GO:0005221 | inferred from sequence or structural similarity with CngA
FBgn0033791	Drl-2	FastLMM	0	0	1	1	0	0	0		ATP binding ; GO:0005524 | inferred from electronic annotation with InterPro:IPR000719 <newline> protein heterodimerization activity ; GO:0046982 | inferred from physical interaction with drl inferred from physical interaction with dnt <newline> protein tyrosine kinase activity ; GO:0004713 | NOT inferred from sequence or structural similarity with drl <newline> Wnt-protein binding ; GO:0017147 |…
FBgn0265296	Dscam2	FastLMM	0	0	1	1	0	0	0		cell-cell adhesion mediator activity ; GO:0098632 | inferred from biological aspect of ancestor with PANTHER:PTN001296633 <newline> identical protein binding ; GO:0042802 | inferred from physical interaction with Dscam2
FBgn0027287	Gmap	FastLMM	0	0	1	1	0	0	0		Rab GTPase binding ; GO:0017137 | inferred from physical interaction with Rab2
FBgn0039348	Npl4	FastLMM	0	0	1	1	0	0	0		protein binding ; GO:0005515 | inferred from physical interaction with UniProtKB:Q7KN62 <newline> ubiquitin binding ; GO:0043130 | inferred from biological aspect of ancestor with PANTHER:PTN000295423 <newline> K11-linked polyubiquitin modification-dependent protein binding ; GO:0071795 | inferred from direct assay <newline> ubiquitin protein ligase binding ; GO:0031625 | inferred from biological…
FBgn0034842	Prosbeta5R1	FastLMM	0	0	1	1	0	0	0		endopeptidase activity ; GO:0004175 | inferred from sequence or structural similarity with SGD:S000006307 <newline> threonine-type endopeptidase activity ; GO:0004298 | inferred from electronic annotation with InterPro:IPR001353, InterPro:IPR023333 <newline> endopeptidase activity ; GO:0004175 | inferred from biological aspect of ancestor with PANTHER:PTN000174701
FBgn0003429	slo	FastLMM	1	0	1	1	0	0	0		protein binding ; GO:0005515 | inferred from physical interaction with Slob <newline> calcium-activated potassium channel activity ; GO:0015269 | inferred from direct assay <newline> calcium-activated potassium channel activity ; GO:0015269 | non-traceable author statement <newline> protein binding ; GO:0005515 | inferred from physical interaction with UniProtKB:P12370 <newline> large conductance…
FBgn0039089	beat-IV	FastLMM	0	1	1	1	0	0	0		molecular_function ; GO:0003674 | no biological data available
FBgn0014141	cher	FastLMM_FastEpistasis	0	0	0	0	1	1	0		actin binding ; GO:0003779 | inferred from sequence or structural similarity with HGNC:3754
FBgn0003944	Ubx	FastLMM_FastEpistasis	0	0	0	0	1	1	0		protein binding ; GO:0005515 | inferred from physical interaction with DIP1 <newline> RNA polymerase II cis-regulatory region sequence-specific DNA binding ; GO:0000978 | inferred from direct assay <newline> DNA-binding transcription factor activity, RNA polymerase II-specific ; GO:0000981 | inferred from biological aspect of ancestor with PANTHER:PTN002388214 <newline> RNA polymerase II cis-regu…
FBgn0259242	CG42340	FastLMM_FastEpistasis	1	0	0	0	0	0	0		potassium ion leak channel activity ; GO:0022841 | inferred from biological aspect of ancestor with PANTHER:PTN000108561
FBgn0041092	tai	FastLMM_FastEpistasis	1	0	0	0	1	0	0		nuclear receptor transcription coactivator activity ; GO:0030374 | inferred from biological aspect of ancestor with PANTHER:PTN000074430 <newline> protein dimerization activity ; GO:0046983 | inferred from electronic annotation with InterPro:IPR011598 <newline> nuclear receptor transcription coactivator activity ; GO:0030374 | inferred from direct assay <newline> nuclear receptor binding ; GO:001…
FBgn0085376	CG34347	FastLMM_FastEpistasis	1	0	0	0	0	1	0		-
FBgn0052600	dpr8	FastLMM_FastEpistasis	1	0	0	0	1	1	0		molecular_function ; GO:0003674 | no biological data available
FBgn0050438	Ugt50B3	FastLMM_FastEpistasis	1	0	0	0	0	0	1		transferase activity, transferring hexosyl groups ; GO:0016758 | inferred from electronic annotation with InterPro:IPR002213 <newline> UDP-glycosyltransferase activity ; GO:0008194 | inferred from biological aspect of ancestor with PANTHER:PTN000230403
FBgn0052264	CG32264	FastLMM_FastEpistasis	0	1	0	0	0	0	0		actin binding ; GO:0003779 | inferred from biological aspect of ancestor with PANTHER:PTN000297672 <newline> actin binding ; GO:0003779 | inferred from sequence or structural similarity with MGI:MGI:2659021
FBgn0265597	rad	FastLMM_FastEpistasis	0	1	0	0	1	0	0		GTPase activator activity ; GO:0005096 | inferred from sequence or structural similarity with RapGAP1
FBgn0034590	Magi	FastLMM_FastEpistasis	0	1	0	0	0	1	0		Ral GTPase binding ; GO:0017160 | inferred from physical interaction with Rala
FBgn0259822	Ca-beta	FastLMM_FastEpistasis	0	1	0	0	0	0	1
FBgn0086906	sls	FastLMM_FastEpistasis	0	0	1	0	1	0	0		actin binding ; GO:0003779 | inferred from direct assay <newline> actin binding ; GO:0003779 | inferred from mutant phenotype <newline> structural constituent of muscle ; GO:0008307 | inferred from mutant phenotype <newline> protein binding ; GO:0005515 | inferred from physical interaction with Msp300
FBgn0053531	Ddr	FastLMM_FastEpistasis	0	0	1	0	0	1	0		transmembrane receptor protein tyrosine kinase activity ; GO:0004714 | inferred from biological aspect of ancestor with PANTHER:PTN002356460 <newline> ATP binding ; GO:0005524 | inferred from electronic annotation with InterPro:IPR000719 <newline> protein tyrosine kinase collagen receptor activity ; GO:0038062 | inferred from biological aspect of ancestor with PANTHER:PTN002400507 <newline> colla…
FBgn0004369	Ptp99A	FastLMM_FastEpistasis	0	0	1	0	0	1	0		protein tyrosine phosphatase activity ; GO:0004725 | inferred from direct assay <newline> transmembrane receptor protein tyrosine phosphatase activity ; GO:0005001 | inferred from sequence or structural similarity <newline> protein tyrosine phosphatase activity ; GO:0004725 | inferred from biological aspect of ancestor with PANTHER:PTN000439233 <newline> protein tyrosine phosphatase activity ; GO…
FBgn0085387	shakB	FastLMM_FastEpistasis	0	0	1	0	0	1	0		gap junction channel activity ; GO:0005243 | inferred from mutant phenotype <newline> gap junction channel activity ; GO:0005243 | inferred from biological aspect of ancestor with PANTHER:PTN000223951 <newline> photoreceptor activity ; GO:0009881 | inferred from mutant phenotype
FBgn0051637	CG31637	FastLMM_FastEpistasis	0	0	1	0	0	0	1		N-acetylglucosamine 6-O-sulfotransferase activity ; GO:0001517 | inferred from biological aspect of ancestor with PANTHER:PTN002473209
FBgn0000547	ed	FastLMM_FastEpistasis	0	1	1	0	0	0	0		cell adhesion molecule binding ; GO:0050839 | inferred from physical interaction with Nrg <newline> protein binding ; GO:0005515 | inferred from physical interaction with Grip <newline> epidermal growth factor receptor binding ; GO:0005154 | inferred from physical interaction with Egfr
FBgn0264384	lncRNA:CR43836	FastLMM_FastEpistasis	0	1	1	0	0	1	0		-
FBgn0263706	CG43658	FastLMM_FastEpistasis	0	0	0	1	0	0	1		guanyl-nucleotide exchange factor activity ; GO:0005085 | inferred from biological aspect of ancestor with PANTHER:PTN000984074 <newline> Rho guanyl-nucleotide exchange factor activity ; GO:0005089 | inferred from sequence or structural similarity with HGNC:14103 <newline> Rho guanyl-nucleotide exchange factor activity ; GO:0005089 | inferred from biological aspect of ancestor with PANTHER:PTN000…
FBgn0040823	dpr6	FastLMM_FastEpistasis	0	1	0	1	0	1	0		molecular_function ; GO:0003674 | no biological data available
FBgn0000479	dnc	FastLMM_FastEpistasis	0	1	0	1	0	0	1		3',5'-cyclic-AMP phosphodiesterase activity ; GO:0004115 | inferred from biological aspect of ancestor with PANTHER:PTN000886915 <newline> 3',5'-cyclic-AMP phosphodiesterase activity ; GO:0004115 | inferred from sequence or structural similarity with SGD:S000005887
FBgn0016797	fz2	FastLMM_FastEpistasis	0	0	1	1	0	0	0		Wnt-activated receptor activity ; GO:0042813 | inferred from direct assay <newline> Wnt-protein binding ; GO:0017147 | inferred from physical interaction with UniProtKB:P09615 <newline> Wnt-activated receptor activity ; GO:0042813 | inferred from genetic interaction with wg <newline> PDZ domain binding ; GO:0030165 | inferred from physical interaction with Grip <newline> Wnt-protein binding ; GO:…
FBgn0002643	mam	FastLMM_FastEpistasis	0	0	1	1	1	0	0		transcription coactivator activity ; GO:0003713 | inferred from electronic annotation with InterPro:IPR019082

## Sheet: Supplementary File 3b
List of the 92 genes found associated to both Mean and Cve of cardiac performance traits
FBgn	NAME	SYMBOL
FBgn0000097	anterior open	aop
FBgn0000464	Leukocyte-antigen-related-like	Lar
FBgn0000547	echinoid	ed
FBgn0000633	-	CG17716
FBgn0001098	Glutamate dehydrogenase	Gdh
FBgn0003089	pipe	pip
FBgn0003380	Shaker	Sh
FBgn0003435	smooth	sm
FBgn0003944	Ultrabithorax	Ubx
FBgn0004369	Protein tyrosine phosphatase 99A	Ptp99A
FBgn0004509	Furin 1	Fur1
FBgn0004595	prospero	pros
FBgn0004652	fruitless	fru
FBgn0010113	headcase	hdc
FBgn0011260	Semaphorin 2a	Sema2a
FBgn0011666	musashi	msi
FBgn0013995	Na/Ca-exchange protein	Calx
FBgn0014343	mirror	mirr
FBgn0015513	myoblast city	mbc
FBgn0015600	toucan	toc
FBgn0020307	defective proventriculus	dve
FBgn0021764	sidekick	sdk
FBgn0027086	Isoleucyl-tRNA synthetase	IleRS
FBgn0028369	kin of irre	kirre
FBgn0028509	Centaurin gamma 1A	CenG1A
FBgn0028875	nicotinic Acetylcholine Receptor alpha5	nAChRalpha5
FBgn0029881	pickled eggs	pigs
FBgn0029939	-	CG9650
FBgn0031016	kekkon 5	kek5
FBgn0031414	eyes shut	eys
FBgn0031835	-	CG11319
FBgn0032151	nicotinic Acetylcholine Receptor alpha6	nAChRalpha6
FBgn0033159	Down syndrome cell adhesion molecule 1	Dscam1
FBgn0035260	-	CG7991
FBgn0035844	-	CG13676
FBgn0036801	Myosin phosphatase targeting subunit 75D	MYPT-75D
FBgn0037153	olf413	olf413
FBgn0038422	-	CG14880
FBgn0038653	alpha2-adrenergic-like octopamine receptor	Octalpha2R
FBgn0038755	Heparan sulfate 6-O-sulfotransferase	Hs6st
FBgn0039633	-	CG11873
FBgn0039647	julius seizure	jus
FBgn0040765	luna	luna
FBgn0040823	defective proboscis extension response 6	dpr6
FBgn0051004	mesh	mesh
FBgn0051121	-	CG31121
FBgn0051721	Tripartite motif containing 9	Trim9
FBgn0052082	Insulin receptor substrate 53 kDa	IRSp53
FBgn0052264	-	CG32264
FBgn0052333	-	CG32333
FBgn0052373	-	CG32373
FBgn0052982	-	CG32982
FBgn0053531	Discoidin domain receptor	Ddr
FBgn0083940	RhoU	RhoU
FBgn0085387	shaking B	shakB
FBgn0085414	defective proboscis extension response 12	dpr12
FBgn0085422	-	CG34393
FBgn0085450	Sno oncogene	Snoo
FBgn0086778	nicotinic Acetylcholine Receptor alpha7	nAChRalpha7
FBgn0086906	sallimus	sls
FBgn0250816	Argonaute 3	AGO3
FBgn0259176	bunched	bun
FBgn0259242	-	CG42340
FBgn0259822
FBgn0260003	Dystrophin	Dys
FBgn0260660	Multiplexin	Mp
FBgn0260943	RNA-binding protein 6	Rbp6
FBgn0261698	slowpoke 2	SLO2
FBgn0261871	defective proboscis extension response 2	dpr2
FBgn0262582	capicua	cic
FBgn0262839	-	CG43203
FBgn0263706	-	CG43658
FBgn0263846	-	CG43707
FBgn0263930	division abnormally delayed	dally
FBgn0264001	bruno 3	bru3
FBgn0264078	Flotillin 2	Flo2
FBgn0264493	roadkill	rdx
FBgn0264562	Hormone receptor 4	Hr4
FBgn0264574	Glucose transporter 1	Glut1
FBgn0265002	-	CG44153
FBgn0265045	Stretchin-Mlck	Strn-Mlck
FBgn0265416	Neuropilin and tolloid-like	Neto
FBgn0265595	-	CG44422
FBgn0265598	Beadex	Bx
FBgn0266084	Formin homology 2 domain containing	Fhos
FBgn0266464	N-ethylmaleimide-sensitive factor 2	Nsf2
FBgn0266696	Supervillin	Svil
FBgn0266756	bitesize	btsz
FBgn0267033	maternal gene required for meiosis	mamo
FBgn0267668	long non-coding RNA:CR46006	lncRNA:CR46006
FBgn0267689	-	CG46025
FBgn0283521	longitudinals lacking	lola

## Sheet: Supplementary File 3c
											List of all variants associated to Cve (Variants Cve) and mean (Variants Mean) identified by FastLMM and FastEpistasis, and overlap between both lists.
All Variants (Cve)					All Variants (Mean)					Overlap
2L_10101396_SNP					2L_10073594_SNP								ID	FlybaseID	GeneSymbol	Position	Type	NbOfLinesForMutationInGWAS	NbOfLinesForMutationInDB	TotalNbOfLinesinDB	sid_index	SNP	Chr	GenDist	ChrPos
2L_10101397_SNP					2L_10105019_SNP					2L_11190559_SNP			2L_11190559_SNP	FBgn0259822	Ca-beta	0	INTRON	42	50	205	566678	2L_11190559_SNP	1	0	11190559
2L_10314560_SNP					2L_10119466_SNP					2L_11190564_SNP			2L_11190564_SNP	FBgn0259822	Ca-beta	0	INTRON	41	49	205	566679	2L_11190564_SNP	1	0	11190564
2L_10346790_SNP					2L_10131351_SNP					X_21804791_SNP			X_21804791_SNP	NA	NA	NA	NA					X_21804791_SNP	5	0	21804791
2L_10356724_SNP					2L_10154649_SNP
2L_10503320_SNP					2L_1026455_SNP
2L_10560973_DEL					2L_10296600_SNP
2L_10678360_SNP					2L_1029907_SNP
2L_10810646_SNP					2L_10546602_SNP
2L_10841819_SNP					2L_10566837_DEL
2L_10917950_SNP					2L_10609395_SNP
2L_11190559_SNP					2L_10647760_SNP
2L_11190564_SNP					2L_10721923_SNP
2L_11197582_SNP					2L_10799060_SNP
2L_11247358_SNP					2L_10923679_SNP
2L_11275400_SNP					2L_11190559_SNP
2L_11555323_SNP					2L_11190564_SNP
2L_12026819_SNP					2L_11279606_SNP
2L_12396480_SNP					2L_11280190_SNP
2L_12515596_SNP					2L_11280405_SNP
2L_12684691_SNP					2L_11407350_SNP
2L_12719537_SNP					2L_11424194_SNP
2L_12780965_SNP					2L_11424211_SNP
2L_12914551_SNP					2L_11841696_SNP
2L_13093955_SNP					2L_11855280_SNP
2L_13119633_SNP					2L_12079494_SNP
2L_13226147_SNP					2L_12132429_SNP
2L_13351897_SNP					2L_12163772_SNP
2L_13884347_SNP					2L_12190653_SNP
2L_14022304_SNP					2L_12190660_SNP
2L_14022306_SNP					2L_12190664_SNP
2L_14023521_SNP					2L_12190669_SNP
2L_14039815_SNP					2L_12190670_SNP
2L_14379409_SNP					2L_12301196_SNP
2L_14442041_SNP					2L_12494207_SNP
2L_14442466_SNP					2L_12494491_INS
2L_14588839_SNP					2L_12494885_SNP
2L_14592285_SNP					2L_12599794_SNP
2L_1465690_SNP					2L_12600138_SNP
2L_14710001_SNP					2L_12779258_SNP
2L_14730254_SNP					2L_1289198_SNP
2L_14730256_SNP					2L_13414855_SNP
2L_14841783_SNP					2L_13414857_SNP
2L_15022506_SNP					2L_13542117_SNP
2L_15304090_SNP					2L_13724029_SNP
2L_15304111_SNP					2L_13768165_SNP
2L_15459144_SNP					2L_13888761_SNP
2L_15459249_SNP					2L_13988457_SNP
2L_15482506_SNP					2L_13988632_SNP
2L_15522241_SNP					2L_14087745_SNP
2L_16013316_SNP					2L_14222249_SNP
2L_16013546_SNP					2L_14559717_SNP
2L_16205117_SNP					2L_14693993_SNP
2L_16234826_SNP					2L_14699268_SNP
2L_16318268_SNP					2L_14699325_SNP
2L_16323778_SNP					2L_14759173_SNP
2L_16332968_SNP					2L_14770293_SNP
2L_16839366_SNP					2L_14867112_SNP
2L_16934329_DEL					2L_15013751_SNP
2L_16979805_SNP					2L_15191720_SNP
2L_1699773_SNP					2L_15232206_SNP
2L_17003815_SNP					2L_15925050_SNP
2L_17026175_SNP					2L_15993028_SNP
2L_17271185_SNP					2L_16504226_SNP
2L_17271461_INS					2L_16504330_SNP
2L_17271541_SNP					2L_16625000_SNP
2L_17628186_SNP					2L_16787708_SNP
2L_17653979_SNP					2L_16817694_SNP
2L_17672873_SNP					2L_16871780_SNP
2L_17699330_SNP					2L_17502449_SNP
2L_17699336_SNP					2L_17624989_SNP
2L_17781429_SNP					2L_1781709_SNP
2L_18394728_SNP					2L_1831426_SNP
2L_1874285_SNP					2L_18545199_SNP
2L_19064874_SNP					2L_18583143_DEL
2L_19088259_SNP					2L_18872067_SNP
2L_19088443_SNP					2L_19396254_SNP
2L_19088749_SNP					2L_19430305_SNP
2L_19096354_SNP					2L_19694078_SNP
2L_19096437_SNP					2L_19874297_SNP
2L_19099428_SNP					2L_2110242_SNP
2L_19107023_SNP					2L_2166489_SNP
2L_19107883_SNP					2L_22112219_SNP
2L_19108368_INS					2L_22124530_SNP
2L_19603564_SNP					2L_22127741_DEL
2L_19608637_SNP					2L_22130022_SNP
2L_20051903_SNP					2L_22130118_SNP
2L_20397137_SNP					2L_22130212_INS
2L_20481532_SNP					2L_22130265_SNP
2L_2164424_SNP					2L_22130275_SNP
2L_2245988_INS					2L_22130283_SNP
2L_22739859_SNP					2L_22130291_SNP
2L_22985756_SNP					2L_22130433_INS
2L_2336283_SNP					2L_22130620_SNP
2L_2439094_SNP					2L_22130673_INS
2L_2651362_SNP					2L_22130694_SNP
2L_2680842_SNP					2L_22130717_SNP
2L_2841842_SNP					2L_22130731_SNP
2L_2849954_SNP					2L_22130773_SNP
2L_2962546_SNP					2L_22130776_SNP
2L_2963969_SNP					2L_22130882_SNP
2L_3081440_SNP					2L_22131367_DEL
2L_3182982_SNP					2L_22131583_SNP
2L_3268761_SNP					2L_22131629_SNP
2L_3342443_SNP					2L_22132871_SNP
2L_3429661_SNP					2L_22133171_SNP
2L_3548300_SNP					2L_22188171_SNP
2L_3666178_SNP					2L_22193298_SNP
2L_3703472_SNP					2L_22199491_SNP
2L_3759056_SNP					2L_2328995_SNP
2L_4053018_SNP					2L_2348632_SNP
2L_4080036_SNP					2L_2461538_SNP
2L_4139714_SNP					2L_2473504_SNP
2L_4332788_SNP					2L_2477862_SNP
2L_4347920_SNP					2L_2539505_SNP
2L_4349931_SNP					2L_2671324_SNP
2L_4450662_SNP					2L_2807139_SNP
2L_4778674_SNP					2L_3104151_SNP
2L_4855911_SNP					2L_3174853_SNP
2L_4960708_SNP					2L_3575104_SNP
2L_506999_SNP					2L_3719155_SNP
2L_5170220_SNP					2L_3744120_SNP
2L_5507344_SNP					2L_3764381_SNP
2L_5854964_SNP					2L_3788988_SNP
2L_5871665_SNP					2L_3792489_SNP
2L_5883050_SNP					2L_3834901_SNP
2L_5942632_SNP					2L_3894049_SNP
2L_6256016_SNP					2L_3919944_SNP
2L_6270900_SNP					2L_3979912_SNP
2L_6298908_DEL					2L_4076077_SNP
2L_6331010_SNP					2L_4314066_SNP
2L_6422252_SNP					2L_4341367_SNP
2L_6515307_SNP					2L_4469637_SNP
2L_6515411_SNP					2L_4521383_SNP
2L_6515439_SNP					2L_4686131_SNP
2L_6515469_SNP					2L_4899161_SNP
2L_6515479_SNP					2L_5063852_SNP
2L_6515492_SNP					2L_5063853_SNP
2L_6515493_SNP					2L_5215284_SNP
2L_6515505_SNP					2L_5471422_DEL
2L_6515599_SNP					2L_5487668_SNP
2L_6515749_SNP					2L_5595606_SNP
2L_6555245_SNP					2L_5641693_SNP
2L_6570607_SNP					2L_5661906_SNP
2L_7072504_SNP					2L_5693625_SNP
2L_7241423_SNP					2L_5809958_SNP
2L_7243692_SNP					2L_5910346_SNP
2L_7331049_SNP					2L_5910809_SNP
2L_7481984_SNP					2L_6129077_SNP
2L_7759807_SNP					2L_6263534_SNP
2L_7764947_SNP					2L_6273727_SNP
2L_783364_SNP					2L_6455154_SNP
2L_7852147_SNP					2L_6458924_SNP
2L_7914724_SNP					2L_6585825_SNP
2L_8233132_SNP					2L_7105739_SNP
2L_8234122_SNP					2L_7122819_SNP
2L_8244736_SNP					2L_7156389_SNP
2L_8341416_SNP					2L_7210639_SNP
2L_8401598_SNP					2L_7703725_SNP
2L_8401649_SNP					2L_7762987_SNP
2L_8401704_SNP					2L_7900140_SNP
2L_8629174_SNP					2L_7900144_SNP
2L_8772585_SNP					2L_7901123_SNP
2L_9054159_SNP					2L_8185446_SNP
2L_9131351_SNP					2L_8191448_SNP
2L_9177953_SNP					2L_8340671_SNP
2L_9204894_SNP					2L_8352488_SNP
2L_9204898_SNP					2L_8355912_SNP
2L_9204905_SNP					2L_8361210_DEL
2L_9287890_SNP					2L_8364685_SNP
2L_9319081_SNP					2L_8503992_SNP
2L_9327133_SNP					2L_8695949_SNP
2L_9334496_SNP					2L_8913833_SNP
2L_9346891_INS					2L_914246_SNP
2L_9347039_SNP					2L_9143557_SNP
2L_9347744_SNP					2L_955974_SNP
2L_9347781_SNP					2L_9571456_SNP
2L_9347789_SNP					2L_9882207_SNP
2L_9348013_SNP					2R_10013626_SNP
2L_9349646_SNP					2R_10436345_SNP
2L_9808372_SNP					2R_10501148_SNP
2L_9837474_SNP					2R_10501277_SNP
2R_10035249_SNP					2R_10709010_SNP
2R_10097017_SNP					2R_10814415_SNP
2R_10390534_SNP					2R_10820304_SNP
2R_10554334_SNP					2R_1095318_SNP
2R_10706560_SNP					2R_11224412_SNP
2R_10719226_SNP					2R_11831141_SNP
2R_10936362_SNP					2R_11850717_SNP
2R_10966000_SNP					2R_12222428_SNP
2R_10966328_SNP					2R_12387530_SNP
2R_11005269_SNP					2R_12441133_SNP
2R_11135878_SNP					2R_12567383_SNP
2R_11406672_SNP					2R_12630045_SNP
2R_1153048_SNP					2R_12653773_SNP
2R_11553050_SNP					2R_12686862_DEL
2R_11751680_SNP					2R_12688953_SNP
2R_11756785_SNP					2R_127410_SNP
2R_11815919_SNP					2R_12832704_SNP
2R_11857739_SNP					2R_130768_INS
2R_11873686_SNP					2R_1317489_SNP
2R_11910074_SNP					2R_13339275_SNP
2R_11976066_SNP					2R_13390703_SNP
2R_12185990_SNP					2R_13390790_SNP
2R_12231059_SNP					2R_13432723_SNP
2R_12403336_SNP					2R_13664692_SNP
2R_1244486_DEL					2R_13679976_SNP
2R_12486076_SNP					2R_13702856_SNP
2R_12635486_SNP					2R_13752655_SNP
2R_12745937_SNP					2R_13772127_SNP
2R_12784365_DEL					2R_14022682_SNP
2R_12879686_SNP					2R_14343186_SNP
2R_13172961_SNP					2R_14388564_SNP
2R_13373087_SNP					2R_14508948_SNP
2R_13380619_SNP					2R_14554440_DEL
2R_13565280_SNP					2R_14554458_SNP
2R_13565304_SNP					2R_14554464_SNP
2R_13756451_SNP					2R_14580701_SNP
2R_13756497_SNP					2R_14955367_SNP
2R_13757451_SNP					2R_14955549_SNP
2R_13828258_SNP					2R_14955563_SNP
2R_13864871_SNP					2R_15065294_SNP
2R_13969642_SNP					2R_15262808_SNP
2R_1399621_SNP					2R_15488793_SNP
2R_1403549_SNP					2R_15549851_SNP
2R_14222340_SNP					2R_15877635_SNP
2R_14222876_SNP					2R_16013691_SNP
2R_14224968_SNP					2R_16013857_SNP
2R_14225660_SNP					2R_16139153_SNP
2R_14229745_SNP					2R_16163959_DEL
2R_14229747_SNP					2R_16312855_SNP
2R_14229748_SNP					2R_16425831_SNP
2R_14229753_SNP					2R_16464539_SNP
2R_14229757_SNP					2R_16482805_SNP
2R_14230117_SNP					2R_16547473_SNP
2R_14230425_DEL					2R_16752213_SNP
2R_14351115_SNP					2R_16878772_SNP
2R_14355669_SNP					2R_16956186_SNP
2R_1437356_SNP					2R_16956194_SNP
2R_14521437_SNP					2R_17109408_SNP
2R_14757081_SNP					2R_17121755_DEL
2R_14892976_INS					2R_17161204_SNP
2R_14928927_SNP					2R_17269996_SNP
2R_15247182_SNP					2R_17358672_SNP
2R_15464368_SNP					2R_17361262_SNP
2R_15594413_DEL					2R_17367566_SNP
2R_15595134_SNP					2R_1738786_SNP
2R_15596156_SNP					2R_17395496_SNP
2R_15596451_DEL					2R_17399542_DEL
2R_16025812_SNP					2R_17432695_SNP
2R_16574892_SNP					2R_1747397_SNP
2R_1689069_SNP					2R_17559522_SNP
2R_16997624_SNP					2R_17559527_SNP
2R_17019353_SNP					2R_17672405_DEL
2R_17028291_SNP					2R_18169434_SNP
2R_17220754_SNP					2R_18496164_INS
2R_1739851_SNP					2R_18717216_SNP
2R_17478765_SNP					2R_18951756_SNP
2R_1778226_SNP					2R_18951762_SNP
2R_17789814_SNP					2R_19841607_SNP
2R_17800857_SNP					2R_19841629_SNP
2R_17863183_SNP					2R_19841683_SNP
2R_17978357_SNP					2R_20204293_SNP
2R_18079911_SNP					2R_20318326_SNP
2R_18153584_SNP					2R_20487376_SNP
2R_18206151_SNP					2R_2583342_SNP
2R_18351438_SNP					2R_2687686_INS
2R_18392082_SNP					2R_2733527_SNP
2R_18493314_SNP					2R_2733769_SNP
2R_18534915_SNP					2R_2747081_DEL
2R_18597021_SNP					2R_2775704_SNP
2R_18719877_SNP					2R_2856804_SNP
2R_18833018_SNP					2R_2869600_SNP
2R_19091296_SNP					2R_2959324_SNP
2R_19105102_SNP					2R_3257605_INS
2R_19107149_SNP					2R_3269620_SNP
2R_19158976_SNP					2R_3457962_SNP
2R_19197072_SNP					2R_3526486_SNP
2R_19204498_SNP					2R_3608921_SNP
2R_19270848_SNP					2R_3676173_SNP
2R_19301870_SNP					2R_3702553_SNP
2R_19564744_SNP					2R_3782522_SNP
2R_19626981_SNP					2R_4472973_SNP
2R_19626997_SNP					2R_4841314_SNP
2R_19665267_SNP					2R_5135091_SNP
2R_19849320_SNP					2R_5814173_SNP
2R_19909174_SNP					2R_6300666_SNP
2R_20139873_SNP					2R_6300667_SNP
2R_21056494_SNP					2R_6365544_SNP
2R_3049355_SNP					2R_6380330_SNP
2R_3236771_SNP					2R_6527959_SNP
2R_3337441_SNP					2R_6641256_SNP
2R_3928891_SNP					2R_6646602_SNP
2R_4062538_SNP					2R_6646607_SNP
2R_4326894_SNP					2R_6770994_SNP
2R_4625801_SNP					2R_6870767_SNP
2R_4629748_SNP					2R_6871650_SNP
2R_4629918_SNP					2R_6932569_SNP
2R_4629920_SNP					2R_6934177_SNP
2R_4630445_SNP					2R_7041422_SNP
2R_4951774_SNP					2R_7459931_SNP
2R_5217898_SNP					2R_7527574_SNP
2R_5585533_SNP					2R_7646097_SNP
2R_5594511_SNP					2R_7646112_SNP
2R_5630500_SNP					2R_7646162_SNP
2R_5685045_SNP					2R_7648286_SNP
2R_6081767_SNP					2R_7899173_SNP
2R_6127440_SNP					2R_7931533_SNP
2R_6133149_SNP					2R_7931534_SNP
2R_6133150_SNP					2R_7935363_SNP
2R_6150815_SNP					2R_7935448_SNP
2R_6272023_SNP					2R_7937141_SNP
2R_6385655_SNP					2R_7937937_SNP
2R_6385723_SNP					2R_7938579_SNP
2R_6568890_SNP					2R_7939269_SNP
2R_6730180_SNP					2R_7939276_SNP
2R_6928347_INS					2R_7939311_SNP
2R_7414549_SNP					2R_7939468_SNP
2R_7485518_SNP					2R_7939816_SNP
2R_795740_SNP					2R_7941989_SNP
2R_8020976_SNP					2R_7944643_SNP
2R_8115960_SNP					2R_7982297_SNP
2R_8864379_SNP					2R_8242026_SNP
2R_8913025_SNP					2R_8550219_SNP
2R_8954142_SNP					2R_8605339_SNP
2R_8954146_SNP					2R_8615921_SNP
2R_8954279_SNP					2R_9127451_SNP
2R_8954386_SNP					2R_9245244_SNP
2R_9078346_SNP					2R_9489105_SNP
2R_9078365_SNP					2R_9524362_SNP
2R_9099617_SNP					2R_9585171_SNP
2R_9231166_SNP					2R_9980917_SNP
2R_9590554_SNP					2_SNP
2R_9725239_SNP					3L_10069907_SNP
2R_9732334_SNP					3L_10074676_SNP
2R_9890442_SNP					3L_10109268_SNP
2R_9909365_DEL					3L_10361376_SNP
2R_9939930_SNP					3L_1038196_SNP
2R_9939931_SNP					3L_10651347_SNP
3L_10035416_SNP					3L_10807909_SNP
3L_10091848_SNP					3L_10855948_INS
3L_10124451_SNP					3L_10856010_SNP
3L_10354759_SNP					3L_10856061_SNP
3L_10356908_SNP					3L_10856090_SNP
3L_10515415_SNP					3L_10856100_SNP
3L_10713956_SNP					3L_10857155_SNP
3L_11092966_SNP					3L_10867913_SNP
3L_11141389_SNP					3L_10893212_SNP
3L_11196878_SNP					3L_10913364_SNP
3L_11196879_SNP					3L_10984029_SNP
3L_1121502_SNP					3L_11116220_SNP
3L_11309025_SNP					3L_11147791_SNP
3L_11630921_SNP					3L_11508282_SNP
3L_11684934_SNP					3L_11508722_SNP
3L_11791350_SNP					3L_11513190_SNP
3L_11805807_SNP					3L_11547252_SNP
3L_12071023_SNP					3L_11638743_SNP
3L_12180214_SNP					3L_11911357_SNP
3L_12696763_SNP					3L_11995438_SNP
3L_1282724_SNP					3L_12047205_SNP
3L_12873492_SNP					3L_12133735_SNP
3L_12936986_SNP					3L_12252534_SNP
3L_12972228_SNP					3L_12281199_DEL
3L_13175329_SNP					3L_12287863_SNP
3L_13376783_SNP					3L_12328810_SNP
3L_13381571_SNP					3L_12401878_SNP
3L_13392521_SNP					3L_12434430_SNP
3L_1339269_SNP					3L_12636052_SNP
3L_13446760_SNP					3L_12639171_SNP
3L_13447852_SNP					3L_12695268_SNP
3L_13485015_SNP					3L_12700855_SNP
3L_13541895_SNP					3L_1281914_SNP
3L_13546126_SNP					3L_12843440_SNP
3L_13710281_SNP					3L_12998354_SNP
3L_13916315_SNP					3L_13080563_SNP
3L_14158229_SNP					3L_13527913_INS
3L_14319289_SNP					3L_13872668_SNP
3L_14325010_SNP					3L_13892964_SNP
3L_14967194_SNP					3L_14068671_SNP
3L_14967226_SNP					3L_14069983_SNP
3L_14967255_SNP					3L_14072155_SNP
3L_15143992_SNP					3L_14072337_SNP
3L_15349030_SNP					3L_14101884_SNP
3L_15360111_SNP					3L_14114981_SNP
3L_15480194_SNP					3L_14861332_SNP
3L_15627346_SNP					3L_15055188_SNP
3L_1621267_SNP					3L_15055191_DEL
3L_16255915_SNP					3L_15055200_SNP
3L_1697340_SNP					3L_15055205_SNP
3L_17103862_SNP					3L_15055212_SNP
3L_17227174_SNP					3L_15055287_SNP
3L_17298333_SNP					3L_15244000_SNP
3L_17591389_SNP					3L_15905376_SNP
3L_17710071_SNP					3L_16186574_SNP
3L_18102876_SNP					3L_16289232_SNP
3L_18120031_SNP					3L_16454189_SNP
3L_18212572_SNP					3L_16480911_SNP
3L_18246742_SNP					3L_16481171_SNP
3L_18247005_SNP					3L_16481217_INS
3L_18355880_SNP					3L_16487772_SNP
3L_18637380_SNP					3L_16512939_SNP
3L_18656746_SNP					3L_1652965_SNP
3L_18984116_SNP					3L_16820115_SNP
3L_18986057_SNP					3L_16860553_SNP
3L_19051695_SNP					3L_1700663_SNP
3L_19089445_SNP					3L_17026097_SNP
3L_19147534_SNP					3L_17104665_SNP
3L_19226559_SNP					3L_17185380_SNP
3L_19319978_SNP					3L_17185395_SNP
3L_1955162_SNP					3L_17933046_SNP
3L_19657614_SNP					3L_17944759_DEL
3L_19923952_SNP					3L_18000109_SNP
3L_1999062_SNP					3L_18092675_SNP
3L_2092172_SNP					3L_18356660_SNP
3L_2104988_SNP					3L_18654105_SNP
3L_21132234_SNP					3L_18687065_SNP
3L_21728632_INS					3L_1868880_DEL
3L_21728643_SNP					3L_18753756_SNP
3L_2198634_SNP					3L_18993580_SNP
3L_2214022_SNP					3L_19283975_SNP
3L_2215049_SNP					3L_19326698_SNP
3L_2215053_SNP					3L_19458208_SNP
3L_2215063_SNP					3L_19677255_SNP
3L_22167885_SNP					3L_19679885_SNP
3L_22284679_SNP					3L_19928346_SNP
3L_23678696_SNP					3L_19997959_INS
3L_2388576_SNP					3L_2046232_SNP
3L_2442704_SNP					3L_2123154_SNP
3L_2523624_SNP					3L_21958637_SNP
3L_281027_SNP					3L_2200591_SNP
3L_2878727_SNP					3L_2200592_SNP
3L_3004012_SNP					3L_22167574_SNP
3L_3165209_SNP					3L_22283409_SNP
3L_3255035_SNP					3L_22311525_INS
3L_3607012_SNP					3L_22329387_SNP
3L_3775747_DEL					3L_22606811_SNP
3L_3775947_SNP					3L_22885117_SNP
3L_3781858_SNP					3L_23009702_SNP
3L_3984911_SNP					3L_23265047_SNP
3L_4029296_SNP					3L_2328726_SNP
3L_4118041_SNP					3L_23589950_SNP
3L_4203706_SNP					3L_2364995_SNP
3L_4228421_SNP					3L_2396040_SNP
3L_4528027_SNP					3L_2401257_SNP
3L_4570842_SNP					3L_2422499_SNP
3L_4899168_SNP					3L_2423101_SNP
3L_5404880_DEL					3L_2427329_SNP
3L_5423554_SNP					3L_24381589_SNP
3L_5914667_SNP					3L_2619954_SNP
3L_5914738_SNP					3L_2628038_SNP
3L_5914739_SNP					3L_2696351_SNP
3L_5914745_INS					3L_2708945_SNP
3L_6065766_SNP					3L_2710597_SNP
3L_6065769_SNP					3L_2735462_SNP
3L_6138003_SNP					3L_2762921_SNP
3L_6482273_SNP					3L_2861778_SNP
3L_6572420_SNP					3L_2995130_SNP
3L_6668717_SNP					3L_3027466_SNP
3L_6668751_SNP					3L_3438403_SNP
3L_6668841_SNP					3L_3742153_SNP
3L_6719592_SNP					3L_3804810_SNP
3L_699691_SNP					3L_384928_SNP
3L_7027387_INS					3L_3883230_SNP
3L_7050540_SNP					3L_3883241_SNP
3L_7172451_SNP					3L_4077346_SNP
3L_7316574_SNP					3L_4534458_SNP
3L_7613603_SNP					3L_4670036_SNP
3L_7716969_SNP					3L_4719102_SNP
3L_7742695_SNP					3L_4755765_SNP
3L_7807671_DEL					3L_4917049_SNP
3L_7865977_SNP					3L_4917323_SNP
3L_8135020_SNP					3L_4917324_SNP
3L_8138282_SNP					3L_5058625_SNP
3L_8254157_SNP					3L_507546_SNP
3L_8265276_SNP					3L_5209897_SNP
3L_8354431_DEL					3L_5256654_SNP
3L_8354448_SNP					3L_5256671_SNP
3L_8354457_SNP					3L_540056_SNP
3L_8354648_SNP					3L_545512_DEL
3L_8412249_SNP					3L_5500030_SNP
3L_8506225_SNP					3L_5601272_SNP
3L_8540502_SNP					3L_5953237_SNP
3L_8559683_SNP					3L_670646_DEL
3L_8782458_SNP					3L_6778839_SNP
3L_8794408_SNP					3L_6781887_SNP
3L_8800995_SNP					3L_6911054_SNP
3L_8828384_SNP					3L_6911116_SNP
3L_8854318_SNP					3L_7032548_SNP
3L_9025697_SNP					3L_7032580_SNP
3L_9025698_SNP					3L_7143915_SNP
3L_9359574_SNP					3L_7143920_SNP
3L_9770209_SNP					3L_7227066_SNP
3L_9772728_SNP					3L_7282937_SNP
3L_978789_SNP					3L_7426814_SNP
3L_9949074_SNP					3L_7485511_SNP
3R_10250959_SNP					3L_7522651_SNP
3R_10324698_SNP					3L_7651275_SNP
3R_10645057_SNP					3L_7781801_SNP
3R_10670543_SNP					3L_8142629_SNP
3R_11025977_SNP					3L_8142646_SNP
3R_11139636_SNP					3L_8159211_SNP
3R_11272053_SNP					3L_8159242_SNP
3R_11601328_SNP					3L_8302277_SNP
3R_11769152_SNP					3L_8536940_SNP
3R_11942442_SNP					3L_8536989_SNP
3R_12059730_SNP					3L_8639959_SNP
3R_12065963_SNP					3L_8656107_SNP
3R_12134711_SNP					3L_8708700_SNP
3R_12191943_SNP					3L_8740229_SNP
3R_12351587_SNP					3L_8775199_SNP
3R_12502301_SNP					3L_8783179_INS
3R_12509505_SNP					3L_8859886_SNP
3R_12596795_SNP					3L_887874_SNP
3R_12737769_SNP					3L_8898332_SNP
3R_12934687_SNP					3L_9173690_SNP
3R_12935590_SNP					3L_9260043_SNP
3R_13114146_SNP					3L_9276897_SNP
3R_13127216_SNP					3L_938314_SNP
3R_13154450_SNP					3L_9560066_SNP
3R_13481956_SNP					3L_9640276_SNP
3R_13653245_SNP					3R_10116797_SNP
3R_13701786_SNP					3R_10206355_SNP
3R_13991711_SNP					3R_10446945_INS
3R_14002491_SNP					3R_10516073_SNP
3R_14048150_SNP					3R_10605876_INS
3R_14065618_SNP					3R_10646290_SNP
3R_14172513_SNP					3R_10900978_SNP
3R_14209921_SNP					3R_11609003_SNP
3R_14350093_SNP					3R_11724264_SNP
3R_14441348_SNP					3R_11724287_SNP
3R_14587218_SNP					3R_11817181_SNP
3R_14611051_SNP					3R_11830898_SNP
3R_14624085_SNP					3R_12187882_SNP
3R_14633124_SNP					3R_12250698_SNP
3R_14677678_DEL					3R_12546376_SNP
3R_14677695_SNP					3R_12961295_SNP
3R_14677749_SNP					3R_13570452_SNP
3R_14677753_SNP					3R_13570469_SNP
3R_14680815_SNP					3R_13570542_SNP
3R_14730504_SNP					3R_13928300_SNP
3R_14730552_SNP					3R_14056389_SNP
3R_15180912_INS					3R_14106047_SNP
3R_15180964_SNP					3R_14356017_SNP
3R_15290001_SNP					3R_14517767_SNP
3R_15294845_SNP					3R_14662344_SNP
3R_15528030_SNP					3R_14739433_SNP
3R_15703372_SNP					3R_15179483_SNP
3R_15775292_SNP					3R_15309412_SNP
3R_16034032_SNP					3R_15621363_SNP
3R_16077944_SNP					3R_15626763_SNP
3R_16112894_SNP					3R_15741367_SNP
3R_16491414_SNP					3R_15822395_SNP
3R_16615548_SNP					3R_16062316_SNP
3R_16665908_SNP					3R_16078078_SNP
3R_16838434_SNP					3R_16133324_SNP
3R_16838459_SNP					3R_16140229_SNP
3R_16838581_SNP					3R_16140420_SNP
3R_16838601_SNP					3R_16140428_DEL
3R_17375921_INS					3R_16140504_SNP
3R_17383040_SNP					3R_16140543_SNP
3R_17524749_SNP					3R_16140544_SNP
3R_17585349_SNP					3R_16140564_SNP
3R_17725960_SNP					3R_16140835_SNP
3R_17830919_SNP					3R_16273119_SNP
3R_1801926_SNP					3R_16558352_SNP
3R_18178677_SNP					3R_16563782_SNP
3R_18235597_SNP					3R_16724086_SNP
3R_18443580_SNP					3R_16817614_SNP
3R_18521462_SNP					3R_17042030_SNP
3R_18725400_SNP					3R_17357063_SNP
3R_18855195_SNP					3R_17486963_SNP
3R_18855266_SNP					3R_17760805_SNP
3R_18855268_SNP					3R_17842029_SNP
3R_19072425_SNP					3R_17908276_SNP
3R_19182085_SNP					3R_18011042_SNP
3R_19382984_SNP					3R_1810277_SNP
3R_19388102_SNP					3R_18136958_SNP
3R_19389250_SNP					3R_18262633_SNP
3R_19389382_SNP					3R_18262651_INS
3R_19399061_INS					3R_18262655_DEL
3R_19399067_INS					3R_18262745_SNP
3R_19426911_DEL					3R_18262749_DEL
3R_19426968_MNP					3R_18274944_SNP
3R_19426990_SNP					3R_1840838_SNP
3R_19428850_SNP					3R_18517406_SNP
3R_19615960_SNP					3R_18517583_SNP
3R_19765339_SNP					3R_19129137_SNP
3R_20002505_SNP					3R_19308215_SNP
3R_20092094_SNP					3R_19611309_SNP
3R_20114148_SNP					3R_19611362_SNP
3R_20229750_SNP					3R_19611446_SNP
3R_20229812_SNP					3R_19611480_SNP
3R_20229841_SNP					3R_19685093_SNP
3R_20229866_SNP					3R_19765011_SNP
3R_20496939_SNP					3R_19777966_SNP
3R_20511318_SNP					3R_19781053_SNP
3R_20514162_SNP					3R_19921471_SNP
3R_20595624_SNP					3R_2008673_DEL
3R_20666367_SNP					3R_20308449_SNP
3R_20666406_INS					3R_20617361_SNP
3R_20666410_SNP					3R_20617376_SNP
3R_20709732_SNP					3R_20671698_INS
3R_21009368_SNP					3R_20716887_SNP
3R_21237655_SNP					3R_20842801_SNP
3R_21310795_SNP					3R_20890860_SNP
3R_21330222_SNP					3R_21193738_DEL
3R_21421100_SNP					3R_21194368_DEL
3R_21444100_SNP					3R_21194376_SNP
3R_21444118_SNP					3R_21194412_SNP
3R_21456433_SNP					3R_21194422_SNP
3R_21456441_SNP					3R_21194431_SNP
3R_21456473_SNP					3R_21194440_SNP
3R_21456486_SNP					3R_2130859_SNP
3R_21456544_INS					3R_21324564_DEL
3R_21476475_SNP					3R_21351842_SNP
3R_21515539_SNP					3R_21504465_SNP
3R_21738736_SNP					3R_21585384_SNP
3R_21795091_SNP					3R_21922483_SNP
3R_21795155_SNP					3R_22050866_DEL
3R_21795290_SNP					3R_22050883_INS
3R_21795302_SNP					3R_22177974_SNP
3R_21795309_SNP					3R_22765969_INS
3R_21795380_SNP					3R_22909747_SNP
3R_21795383_SNP					3R_23315858_SNP
3R_21795431_SNP					3R_23315867_SNP
3R_21807920_SNP					3R_23317738_SNP
3R_21886223_SNP					3R_23508084_SNP
3R_22011903_SNP					3R_24451849_SNP
3R_22256046_SNP					3R_24623764_SNP
3R_22428056_SNP					3R_24843955_SNP
3R_22779369_SNP					3R_24874996_SNP
3R_22813673_SNP					3R_24899201_SNP
3R_22827761_SNP					3R_24901661_SNP
3R_23240424_SNP					3R_24934064_SNP
3R_23970095_SNP					3R_24951516_SNP
3R_24200398_SNP					3R_25001375_SNP
3R_24253004_SNP					3R_25056759_SNP
3R_24517089_SNP					3R_25143244_SNP
3R_24921213_SNP					3R_25201782_SNP
3R_25010632_SNP					3R_25202605_SNP
3R_25068857_SNP					3R_25202883_SNP
3R_25238581_SNP					3R_25265611_SNP
3R_25248808_SNP					3R_25318629_SNP
3R_25427708_SNP					3R_25331373_DEL
3R_25453601_SNP					3R_25331377_SNP
3R_25459289_SNP					3R_25331378_SNP
3R_25461475_SNP					3R_25331382_SNP
3R_2551338_SNP					3R_25331383_SNP
3R_25617885_SNP					3R_25331386_DEL
3R_25922016_SNP					3R_25686042_SNP
3R_2600434_SNP					3R_25961727_SNP
3R_2600435_SNP					3R_26038443_SNP
3R_26078315_SNP					3R_26095290_SNP
3R_26129309_SNP					3R_26095311_SNP
3R_26129334_INS					3R_26121371_SNP
3R_26672281_SNP					3R_27004559_SNP
3R_26672317_SNP					3R_27475157_SNP
3R_26672345_SNP					3R_27805902_SNP
3R_26676391_SNP					3R_2992178_SNP
3R_26676810_SNP					3R_3017082_SNP
3R_26676943_SNP					3R_3151448_SNP
3R_26677053_SNP					3R_3402277_SNP
3R_26677056_DEL					3R_3618967_SNP
3R_26677069_SNP					3R_3816183_SNP
3R_26677071_SNP					3R_4043437_SNP
3R_26677072_SNP					3R_4153850_SNP
3R_26677077_MNP					3R_4157655_SNP
3R_26677082_SNP					3R_4452759_SNP
3R_26677087_SNP					3R_4531462_SNP
3R_26677092_SNP					3R_4537507_SNP
3R_26677094_SNP					3R_4538350_SNP
3R_26677188_SNP					3R_4538400_SNP
3R_26677191_SNP					3R_4550464_SNP
3R_26677197_SNP					3R_4559608_SNP
3R_26677200_SNP					3R_5076038_SNP
3R_26677208_DEL					3R_5096375_SNP
3R_26677213_SNP					3R_5096376_SNP
3R_26677310_SNP					3R_5434177_SNP
3R_26678074_SNP					3R_5947278_SNP
3R_26698495_SNP					3R_6137046_SNP
3R_26705950_SNP					3R_6186311_SNP
3R_26891310_SNP					3R_6186454_SNP
3R_27008500_SNP					3R_6186975_SNP
3R_27021278_SNP					3R_6201449_SNP
3R_27140765_SNP					3R_6267808_SNP
3R_27142509_SNP					3R_6481093_SNP
3R_27206735_SNP					3R_6939644_SNP
3R_27206871_SNP					3R_6945791_SNP
3R_27268540_INS					3R_6946263_SNP
3R_27269205_SNP					3R_7184420_SNP
3R_27276975_SNP					3R_9045651_SNP
3R_3049448_SNP					3R_9047217_SNP
3R_3083010_SNP					3R_9659783_SNP
3R_4032837_SNP					3R_9665952_INS
3R_4270844_SNP					3R_9793988_INS
3R_4756211_SNP					3R_9793997_DEL
3R_5225273_SNP					3R_9799338_INS
3R_5741543_SNP					3R_9799395_SNP
3R_6029798_SNP					3R_9799420_SNP
3R_6489573_SNP					3R_9799433_SNP
3R_7166359_SNP					3R_9799511_SNP
3R_7655805_SNP					3R_9799594_SNP
3R_7971206_SNP					3R_9827173_SNP
3R_9126697_SNP					3R_9854781_SNP
3R_9223715_SNP					3R_9990842_SNP
3R_9458176_SNP					ID
3R_9661151_SNP					SNP
3R_9825245_SNP					X_10010361_SNP
3R_9864096_SNP					X_10280412_SNP
3R_9864111_SNP					X_10317171_SNP
3R_9864144_SNP					X_11076658_SNP
3R_9864150_SNP					X_11076679_SNP
3R_9864151_SNP					X_11076749_SNP
4_537417_SNP					X_11123801_SNP
4_905422_DEL					X_11126046_SNP
ID					X_11130913_SNP
SNP					X_12111468_SNP
X_10023320_SNP					X_12401367_SNP
X_10194373_SNP					X_12577932_SNP
X_10293756_SNP					X_12577997_SNP
X_10405684_SNP					X_12768325_SNP
X_10596389_SNP					X_12835494_SNP
X_10813564_SNP					X_13020488_SNP
X_10959755_SNP					X_13037271_DEL
X_11044471_SNP					X_13350244_SNP
X_11112326_SNP					X_13749375_SNP
X_11151581_SNP					X_13775729_SNP
X_11205540_SNP					X_13814753_SNP
X_11407457_SNP					X_14080811_SNP
X_11407530_SNP					X_14563758_SNP
X_11556393_SNP					X_14777885_SNP
X_11734924_SNP					X_15059187_SNP
X_11793524_SNP					X_15059257_SNP
X_11794447_SNP					X_15212099_SNP
X_11833_SNP					X_15214154_SNP
X_11875_SNP					X_15222737_SNP
X_12367086_SNP					X_15222738_SNP
X_12446556_DEL					X_15224104_SNP
X_12446560_SNP					X_15241431_SNP
X_12464766_SNP					X_15241432_SNP
X_12659689_SNP					X_15241453_SNP
X_12872193_SNP					X_15356921_SNP
X_12903619_SNP					X_15524532_SNP
X_12952305_SNP					X_15555097_SNP
X_13079272_SNP					X_15576294_SNP
X_13169375_SNP					X_15714287_SNP
X_13368751_SNP					X_1572484_SNP
X_13502809_SNP					X_15819726_SNP
X_13784370_SNP					X_16175347_INS
X_13918963_SNP					X_16596962_SNP
X_14211578_SNP					X_16596964_INS
X_14232609_SNP					X_16817555_SNP
X_14232626_SNP					X_16893482_SNP
X_14287483_SNP					X_17207839_SNP
X_14706075_SNP					X_17208096_SNP
X_14794177_SNP					X_17287913_SNP
X_14845499_SNP					X_17387213_SNP
X_14951781_SNP					X_17452135_SNP
X_15101167_SNP					X_17834374_SNP
X_15101247_SNP					X_17947930_SNP
X_15282311_SNP					X_1839897_SNP
X_15294969_DEL					X_18412914_SNP
X_15294998_SNP					X_18482963_SNP
X_15295087_SNP					X_19076168_SNP
X_15383928_SNP					X_19109536_SNP
X_15569186_SNP					X_19112018_SNP
X_15741752_SNP					X_19113826_SNP
X_15847571_SNP					X_19157091_SNP
X_15906950_SNP					X_19237040_SNP
X_15998801_SNP					X_19286400_SNP
X_16010224_SNP					X_19520105_SNP
X_16138638_SNP					X_19634922_SNP
X_16138642_SNP					X_19645981_SNP
X_16138643_SNP					X_19646015_SNP
X_16138729_INS					X_19740995_SNP
X_16138734_DEL					X_19997819_SNP
X_16138748_SNP					X_20323130_SNP
X_16161197_SNP					X_20323144_SNP
X_16377320_SNP					X_20323165_SNP
X_16483617_SNP					X_20369946_SNP
X_16483632_SNP					X_20400431_SNP
X_16489263_SNP					X_20420863_SNP
X_16489513_SNP					X_20420870_SNP
X_16489518_SNP					X_20420879_SNP
X_16489527_SNP					X_20430870_SNP
X_16582343_SNP					X_20443781_SNP
X_16921280_DEL					X_20443827_SNP
X_170534_SNP					X_20685456_SNP
X_17082416_SNP					X_20789813_SNP
X_17378229_SNP					X_21337240_SNP
X_17452704_SNP					X_21338106_SNP
X_17571858_SNP					X_21804791_SNP
X_17857922_SNP					X_21835667_SNP
X_18041754_INS					X_22060249_SNP
X_18041757_SNP					X_22062118_SNP
X_18041758_SNP					X_22233916_SNP
X_18446153_SNP					X_22234030_SNP
X_18483463_SNP					X_222372_SNP
X_18661264_SNP					X_22351278_SNP
X_1877363_SNP					X_2344371_SNP
X_19168464_SNP					X_2353514_SNP
X_19174841_SNP					X_2354612_SNP
X_19228897_SNP					X_2354613_SNP
X_19264273_SNP					X_2413556_SNP
X_19298843_SNP					X_2458269_SNP
X_19352546_SNP					X_2574735_SNP
X_19537303_SNP					X_2581591_SNP
X_19537322_SNP					X_2769163_SNP
X_19537335_SNP					X_2780947_SNP
X_19562988_SNP					X_2994814_SNP
X_19667002_DEL					X_312375_SNP
X_20483658_SNP					X_3459477_SNP
X_20540461_SNP					X_3607262_DEL
X_20604177_SNP					X_3607392_SNP
X_20650245_SNP					X_3613930_SNP
X_20691356_SNP					X_3613994_SNP
X_20833353_SNP					X_3614191_SNP
X_20833358_SNP					X_3729381_SNP
X_21085304_SNP					X_5226493_SNP
X_21262450_SNP					X_5718369_SNP
X_21345486_INS					X_5873710_SNP
X_21493635_SNP					X_604704_SNP
X_21589434_SNP					X_6132696_SNP
X_21804791_SNP					X_628214_SNP
X_21862064_DEL					X_6355292_SNP
X_22061621_SNP					X_6485901_SNP
X_22195559_SNP					X_6514049_SNP
X_2704955_SNP					X_6539653_SNP
X_2899941_SNP					X_6702714_SNP
X_3143708_SNP					X_7060779_SNP
X_3162291_SNP					X_7308042_SNP
X_3188221_SNP					X_7528359_SNP
X_3400196_SNP					X_7631134_SNP
X_3968110_SNP					X_8548858_SNP
X_4046046_SNP					X_8729314_SNP
X_4094884_SNP					X_8781785_SNP
X_4379920_SNP					X_9063326_SNP
X_4568660_SNP					X_9063484_SNP
X_5010924_SNP					X_9558707_SNP
X_5167090_SNP					X_9932575_SNP
X_5168435_SNP					X_998715_SNP
X_5168456_SNP
X_5279292_SNP
X_5319990_SNP
X_5356668_DEL
X_5590850_SNP
X_5612922_SNP
X_5747690_SNP
X_5916751_SNP
X_602341_SNP
X_6280164_SNP
X_6336047_SNP
X_6366839_SNP
X_6503450_SNP
X_6571208_DEL
X_6592817_SNP
X_6593025_SNP
X_6593163_INS
X_6594064_SNP
X_6594232_SNP
X_6594296_SNP
X_6833030_SNP
X_6844423_SNP
X_7088987_SNP
X_7466819_DEL
X_7466888_SNP
X_7719829_SNP
X_7763427_SNP
X_8082775_SNP
X_8235638_SNP
X_8401699_SNP
X_8431837_SNP
X_8431841_SNP
X_850652_SNP
X_8621385_SNP
X_8656763_SNP
X_8718656_INS
X_8725609_SNP
X_8731906_SNP
X_8868273_SNP
X_8897824_SNP
X_890667_SNP
X_8934392_DEL
X_9084535_SNP
X_9451027_SNP
X_9826784_SNP
ll

## Sheet: Supplementary File 3d
Enriched annotations within genes associated to GWA on CVe.
Functional enrichment analysis performed on the 566 genes from FastLMM and FastEpistasis analyses, all traits merged (Supplementary File 2e), using g:GOSt from G profiler. Parameters used were as follow: Background: all annotated genes / Selected GO terms size >6 and <500.
source	term_name	term_id	adjusted_p_value	negative_log10_of_adjusted_p_value	term_size	query_size	intersection_size	effective_domain_size	intersections
GO:MF	cell adhesion molecule binding	GO:0050839	1.6290734837059688e-8	7.788059325238312	65	474	18	11762	FBGN0033159,FBGN0262614,FBGN0000633,FBGN0260442,FBGN0052183,FBGN0265002,FBGN0263219,FBGN0028369,FBGN0028482,FBGN0266801,FBGN0011722,FBGN0024836,FBGN0000635,FBGN0015609,FBGN0001257,FBGN0264975,FBGN0265296,FBGN0000547
GO:MF	cell-cell adhesion mediator activity	GO:0098632	0.000015689823789313808	4.804381933899259	11	474	7	11762	FBGN0033159,FBGN0265002,FBGN0263219,FBGN0028482,FBGN0000635,FBGN0001257,FBGN0265296
GO:MF	cell adhesion mediator activity	GO:0098631	0.000015689823789313808	4.804381933899259	11	474	7	11762	FBGN0033159,FBGN0265002,FBGN0263219,FBGN0028482,FBGN0000635,FBGN0001257,FBGN0265296
GO:MF	signaling receptor activity	GO:0038023	0.0011616642783094243	2.9349193651850065	426	474	38	11762	FBGN0033159,FBGN0051660,FBGN0260446,FBGN0038653,FBGN0014073,FBGN0045478,FBGN0264562,FBGN0037685,FBGN0032006,FBGN0015519,FBGN0265002,FBGN0004842,FBGN0000464,FBGN0030954,FBGN0041250,FBGN0085440,FBGN0004370,FBGN0032151,FBGN0266137,FBGN0000036,FBGN0036368,FBGN0028875,FBGN0003720,FBGN0024836,FBGN0001085,FBGN0032752,FBGN0017590,FBGN0029761,FBGN0029768,FBGN0085410,FBGN0035385,FBGN0041240,FBGN0041237,FBG…
GO:MF	molecular transducer activity	GO:0060089	0.0011616642783094243	2.9349193651850065	426	474	38	11762	FBGN0033159,FBGN0051660,FBGN0260446,FBGN0038653,FBGN0014073,FBGN0045478,FBGN0264562,FBGN0037685,FBGN0032006,FBGN0015519,FBGN0265002,FBGN0004842,FBGN0000464,FBGN0030954,FBGN0041250,FBGN0085440,FBGN0004370,FBGN0032151,FBGN0266137,FBGN0000036,FBGN0036368,FBGN0028875,FBGN0003720,FBGN0024836,FBGN0001085,FBGN0032752,FBGN0017590,FBGN0029761,FBGN0029768,FBGN0085410,FBGN0035385,FBGN0041240,FBGN0041237,FBG…
GO:MF	transmembrane signaling receptor activity	GO:0004888	0.0029331473458066135	2.532666119814054	360	474	33	11762	FBGN0033159,FBGN0051660,FBGN0260446,FBGN0038653,FBGN0014073,FBGN0045478,FBGN0037685,FBGN0032006,FBGN0015519,FBGN0265002,FBGN0004842,FBGN0000464,FBGN0030954,FBGN0041250,FBGN0085440,FBGN0004370,FBGN0032151,FBGN0266137,FBGN0000036,FBGN0028875,FBGN0024836,FBGN0001085,FBGN0032752,FBGN0017590,FBGN0029768,FBGN0085410,FBGN0035385,FBGN0041240,FBGN0041237,FBGN0086778,FBGN0053531,FBGN0004369,FBGN0016797
GO:MF	acetylcholine-gated cation-selective channel activity	GO:0022848	0.007341447744500834	2.1342182881154184	10	474	5	11762	FBGN0015519,FBGN0032151,FBGN0000036,FBGN0028875,FBGN0086778
GO:MF	excitatory extracellular ligand-gated ion channel activity	GO:0005231	0.033897035072824	1.4698382872784723	13	474	5	11762	FBGN0015519,FBGN0032151,FBGN0000036,FBGN0028875,FBGN0086778
GO:MF	cation channel activity	GO:0005261	0.045211227637259085	1.3447537002462002	182	474	19	11762	FBGN0042185,FBGN0285944,FBGN0003380,FBGN0014391,FBGN0015519,FBGN0020258,FBGN0032151,FBGN0000036,FBGN0261999,FBGN0261571,FBGN0028875,FBGN0029761,FBGN0016119,FBGN0086778,FBGN0261698,FBGN0263257,FBGN0003429,FBGN0259242,FBGN0259822
GO:BP	axonogenesis	GO:0007409	2.5689891794651346e-16	15.59023772497012	350	472	56	11798	FBGN0053179,FBGN0033159,FBGN0003090,FBGN0264442,FBGN0014343,FBGN0002573,FBGN0039584,FBGN0005624,FBGN0286785,FBGN0003380,FBGN0003435,FBGN0011260,FBGN0038498,FBGN0265002,FBGN0000577,FBGN0001297,FBGN0284221,FBGN0000464,FBGN0004370,FBGN0263219,FBGN0028482,FBGN0260660,FBGN0011259,FBGN0011722,FBGN0283521,FBGN0259236,FBGN0016061,FBGN0085443,FBGN0024836,FBGN0001085,FBGN0028644,FBGN0032752,FBGN0000635,FBG…
GO:BP	chemotaxis	GO:0006935	4.1929993485768164e-16	15.377475205068293	307	472	52	11798	FBGN0053179,FBGN0033159,FBGN0003090,FBGN0264442,FBGN0020306,FBGN0014343,FBGN0002573,FBGN0039584,FBGN0005624,FBGN0286785,FBGN0003435,FBGN0011260,FBGN0031888,FBGN0038498,FBGN0265002,FBGN0000577,FBGN0284221,FBGN0000464,FBGN0004370,FBGN0263219,FBGN0028482,FBGN0260660,FBGN0011259,FBGN0011722,FBGN0000490,FBGN0283521,FBGN0259236,FBGN0016061,FBGN0024836,FBGN0001085,FBGN0028644,FBGN0032752,FBGN0000635,FBG…
GO:BP	axon development	GO:0061564	1.293621924711711e-15	14.888192632479651	362	472	56	11798	FBGN0053179,FBGN0033159,FBGN0003090,FBGN0264442,FBGN0014343,FBGN0002573,FBGN0039584,FBGN0005624,FBGN0286785,FBGN0003380,FBGN0003435,FBGN0011260,FBGN0038498,FBGN0265002,FBGN0000577,FBGN0001297,FBGN0284221,FBGN0000464,FBGN0004370,FBGN0263219,FBGN0028482,FBGN0260660,FBGN0011259,FBGN0011722,FBGN0283521,FBGN0259236,FBGN0016061,FBGN0085443,FBGN0024836,FBGN0001085,FBGN0028644,FBGN0032752,FBGN0000635,FBG…
GO:BP	neuron projection guidance	GO:0097485	2.0730427592868494e-15	14.683391739907679	295	472	50	11798	FBGN0053179,FBGN0033159,FBGN0003090,FBGN0264442,FBGN0020306,FBGN0014343,FBGN0002573,FBGN0039584,FBGN0005624,FBGN0286785,FBGN0003435,FBGN0011260,FBGN0038498,FBGN0265002,FBGN0000577,FBGN0284221,FBGN0000464,FBGN0004370,FBGN0263219,FBGN0028482,FBGN0260660,FBGN0011259,FBGN0011722,FBGN0283521,FBGN0259236,FBGN0016061,FBGN0024836,FBGN0001085,FBGN0028644,FBGN0032752,FBGN0000635,FBGN0017590,FBGN0028991,FBG…
GO:BP	taxis	GO:0042330	2.4822293403198632e-15	14.605158095265157	367	472	56	11798	FBGN0053179,FBGN0039464,FBGN0033159,FBGN0003090,FBGN0264442,FBGN0020306,FBGN0014343,FBGN0002573,FBGN0039584,FBGN0005624,FBGN0286785,FBGN0003435,FBGN0011260,FBGN0031888,FBGN0038498,FBGN0265002,FBGN0000577,FBGN0284221,FBGN0025879,FBGN0000464,FBGN0004370,FBGN0263219,FBGN0028482,FBGN0005619,FBGN0260660,FBGN0011259,FBGN0011722,FBGN0000490,FBGN0283521,FBGN0261549,FBGN0259236,FBGN0016061,FBGN0024836,FBG…
GO:BP	cell morphogenesis involved in neuron differentiation	GO:0048667	2.6869098648818848e-15	14.570746902171594	456	472	63	11798	FBGN0053179,FBGN0033159,FBGN0003090,FBGN0264442,FBGN0020306,FBGN0014343,FBGN0002573,FBGN0039584,FBGN0285955,FBGN0005624,FBGN0083981,FBGN0286785,FBGN0003380,FBGN0003435,FBGN0000163,FBGN0011260,FBGN0038498,FBGN0265002,FBGN0000577,FBGN0001297,FBGN0284221,FBGN0085450,FBGN0000464,FBGN0015371,FBGN0025360,FBGN0004370,FBGN0263219,FBGN0028482,FBGN0260660,FBGN0011259,FBGN0011722,FBGN0283521,FBGN0259236,FBG…
GO:BP	axon guidance	GO:0007411	3.4104932530211836e-15	14.467182805296758	287	472	49	11798	FBGN0053179,FBGN0033159,FBGN0003090,FBGN0264442,FBGN0014343,FBGN0002573,FBGN0039584,FBGN0005624,FBGN0286785,FBGN0003435,FBGN0011260,FBGN0038498,FBGN0265002,FBGN0000577,FBGN0284221,FBGN0000464,FBGN0004370,FBGN0263219,FBGN0028482,FBGN0260660,FBGN0011259,FBGN0011722,FBGN0283521,FBGN0259236,FBGN0016061,FBGN0024836,FBGN0001085,FBGN0028644,FBGN0032752,FBGN0000635,FBGN0017590,FBGN0028991,FBGN0051721,FBG…
GO:BP	neuron projection morphogenesis	GO:0048812	5.245827864687403e-15	14.280185964344774	462	472	63	11798	FBGN0053179,FBGN0033159,FBGN0003090,FBGN0264442,FBGN0020306,FBGN0014343,FBGN0002573,FBGN0039584,FBGN0285955,FBGN0005624,FBGN0083981,FBGN0286785,FBGN0003380,FBGN0003435,FBGN0035802,FBGN0011260,FBGN0038498,FBGN0265002,FBGN0000577,FBGN0001297,FBGN0284221,FBGN0085450,FBGN0000464,FBGN0015371,FBGN0025360,FBGN0004370,FBGN0263219,FBGN0028482,FBGN0260660,FBGN0011259,FBGN0011722,FBGN0283521,FBGN0259236,FBG…
GO:BP	plasma membrane bounded cell projection morphogenesis	GO:0120039	5.85753064218302e-15	14.23228543082384	463	472	63	11798	FBGN0053179,FBGN0033159,FBGN0003090,FBGN0264442,FBGN0020306,FBGN0014343,FBGN0002573,FBGN0039584,FBGN0285955,FBGN0005624,FBGN0083981,FBGN0286785,FBGN0003380,FBGN0003435,FBGN0035802,FBGN0011260,FBGN0038498,FBGN0265002,FBGN0000577,FBGN0001297,FBGN0284221,FBGN0085450,FBGN0000464,FBGN0015371,FBGN0025360,FBGN0004370,FBGN0263219,FBGN0028482,FBGN0260660,FBGN0011259,FBGN0011722,FBGN0283521,FBGN0259236,FBG…
GO:BP	cell projection morphogenesis	GO:0048858	7.295763928218197e-15	14.136929227082446	465	472	63	11798	FBGN0053179,FBGN0033159,FBGN0003090,FBGN0264442,FBGN0020306,FBGN0014343,FBGN0002573,FBGN0039584,FBGN0285955,FBGN0005624,FBGN0083981,FBGN0286785,FBGN0003380,FBGN0003435,FBGN0035802,FBGN0011260,FBGN0038498,FBGN0265002,FBGN0000577,FBGN0001297,FBGN0284221,FBGN0085450,FBGN0000464,FBGN0015371,FBGN0025360,FBGN0004370,FBGN0263219,FBGN0028482,FBGN0260660,FBGN0011259,FBGN0011722,FBGN0283521,FBGN0259236,FBG…
GO:BP	cell part morphogenesis	GO:0032990	1.9273763800859562e-14	13.71503346757958	474	472	63	11798	FBGN0053179,FBGN0033159,FBGN0003090,FBGN0264442,FBGN0020306,FBGN0014343,FBGN0002573,FBGN0039584,FBGN0285955,FBGN0005624,FBGN0083981,FBGN0286785,FBGN0003380,FBGN0003435,FBGN0035802,FBGN0011260,FBGN0038498,FBGN0265002,FBGN0000577,FBGN0001297,FBGN0284221,FBGN0085450,FBGN0000464,FBGN0015371,FBGN0025360,FBGN0004370,FBGN0263219,FBGN0028482,FBGN0260660,FBGN0011259,FBGN0011722,FBGN0283521,FBGN0259236,FBG…
GO:BP	neuron projection development	GO:0031175	3.8199596100757544e-14	13.417941229029118	494	472	64	11798	FBGN0053179,FBGN0033159,FBGN0003090,FBGN0264442,FBGN0020306,FBGN0014343,FBGN0002573,FBGN0039584,FBGN0285955,FBGN0005624,FBGN0083981,FBGN0286785,FBGN0003380,FBGN0003435,FBGN0035802,FBGN0011260,FBGN0038498,FBGN0265002,FBGN0000577,FBGN0001297,FBGN0284221,FBGN0085450,FBGN0000464,FBGN0015371,FBGN0025360,FBGN0004370,FBGN0263219,FBGN0028482,FBGN0260660,FBGN0011259,FBGN0011722,FBGN0283521,FBGN0259236,FBG…
GO:BP	cell adhesion	GO:0007155	4.884623484855174e-12	11.31116890681762	234	472	40	11798	FBGN0053179,FBGN0033159,FBGN0262614,FBGN0039584,FBGN0000633,FBGN0286785,FBGN0000163,FBGN0266084,FBGN0260442,FBGN0051004,FBGN0000097,FBGN0052183,FBGN0000711,FBGN0038498,FBGN0265002,FBGN0021764,FBGN0025879,FBGN0000464,FBGN0263219,FBGN0028369,FBGN0028482,FBGN0266801,FBGN0260660,FBGN0263289,FBGN0011722,FBGN0034709,FBGN0024836,FBGN0001085,FBGN0028644,FBGN0000635,FBGN0017590,FBGN0028991,FBGN0015609,FBG…
GO:BP	epithelial tube morphogenesis	GO:0060562	8.507414367902063e-12	11.070202413637945	480	472	59	11798	FBGN0038755,FBGN0003090,FBGN0262614,FBGN0264442,FBGN0014343,FBGN0285955,FBGN0000163,FBGN0005427,FBGN0266084,FBGN0015513,FBGN0035802,FBGN0032006,FBGN0260442,FBGN0265598,FBGN0000711,FBGN0052062,FBGN0000577,FBGN0001297,FBGN0025879,FBGN0262699,FBGN0266464,FBGN0004370,FBGN0259678,FBGN0052666,FBGN0261988,FBGN0263289,FBGN0015615,FBGN0000490,FBGN0024244,FBGN0026411,FBGN0283521,FBGN0003175,FBGN0036801,FBG…
GO:BP	post-embryonic animal morphogenesis	GO:0009886	1.495179249406983e-11	10.825306738870115	472	472	58	11798	FBGN0038755,FBGN0003090,FBGN0264442,FBGN0014343,FBGN0285955,FBGN0286071,FBGN0005427,FBGN0266084,FBGN0015513,FBGN0035802,FBGN0032006,FBGN0260442,FBGN0265598,FBGN0000567,FBGN0000711,FBGN0052062,FBGN0000577,FBGN0001297,FBGN0025879,FBGN0262699,FBGN0259678,FBGN0266756,FBGN0052666,FBGN0261988,FBGN0263289,FBGN0015615,FBGN0000490,FBGN0024244,FBGN0026411,FBGN0283521,FBGN0003175,FBGN0036801,FBGN0024836,FBG…
GO:BP	biological adhesion	GO:0022610	1.5792847509959475e-11	10.801539557998746	242	472	40	11798	FBGN0053179,FBGN0033159,FBGN0262614,FBGN0039584,FBGN0000633,FBGN0286785,FBGN0000163,FBGN0266084,FBGN0260442,FBGN0051004,FBGN0000097,FBGN0052183,FBGN0000711,FBGN0038498,FBGN0265002,FBGN0021764,FBGN0025879,FBGN0000464,FBGN0263219,FBGN0028369,FBGN0028482,FBGN0266801,FBGN0260660,FBGN0263289,FBGN0011722,FBGN0034709,FBGN0024836,FBGN0001085,FBGN0028644,FBGN0000635,FBGN0017590,FBGN0028991,FBGN0015609,FBG…
GO:BP	cell-cell adhesion	GO:0098609	2.0475726955876385e-11	10.688760670406557	138	472	30	11798	FBGN0053179,FBGN0033159,FBGN0262614,FBGN0039584,FBGN0000633,FBGN0286785,FBGN0000163,FBGN0260442,FBGN0000097,FBGN0038498,FBGN0265002,FBGN0021764,FBGN0025879,FBGN0000464,FBGN0263219,FBGN0028369,FBGN0028482,FBGN0266801,FBGN0263289,FBGN0024836,FBGN0001085,FBGN0028644,FBGN0000635,FBGN0017590,FBGN0015609,FBGN0001257,FBGN0264975,FBGN0265296,FBGN0039089,FBGN0000547
GO:BP	imaginal disc morphogenesis	GO:0007560	2.586672441549981e-11	10.587258563874943	409	472	53	11798	FBGN0038755,FBGN0003090,FBGN0264442,FBGN0014343,FBGN0285955,FBGN0005427,FBGN0266084,FBGN0015513,FBGN0035802,FBGN0032006,FBGN0260442,FBGN0265598,FBGN0000711,FBGN0052062,FBGN0000577,FBGN0001297,FBGN0025879,FBGN0262699,FBGN0259678,FBGN0052666,FBGN0261988,FBGN0263289,FBGN0015615,FBGN0000490,FBGN0024244,FBGN0026411,FBGN0283521,FBGN0003175,FBGN0036801,FBGN0024836,FBGN0001085,FBGN0000635,FBGN0011225,FBG…
GO:BP	post-embryonic animal organ morphogenesis	GO:0048563	2.586672441549981e-11	10.587258563874943	409	472	53	11798	FBGN0038755,FBGN0003090,FBGN0264442,FBGN0014343,FBGN0285955,FBGN0005427,FBGN0266084,FBGN0015513,FBGN0035802,FBGN0032006,FBGN0260442,FBGN0265598,FBGN0000711,FBGN0052062,FBGN0000577,FBGN0001297,FBGN0025879,FBGN0262699,FBGN0259678,FBGN0052666,FBGN0261988,FBGN0263289,FBGN0015615,FBGN0000490,FBGN0024244,FBGN0026411,FBGN0283521,FBGN0003175,FBGN0036801,FBGN0024836,FBGN0001085,FBGN0000635,FBGN0011225,FBG…
GO:BP	post-embryonic animal organ development	GO:0048569	3.4099293998400604e-11	10.467254612672397	495	472	59	11798	FBGN0038755,FBGN0003090,FBGN0264442,FBGN0014343,FBGN0285955,FBGN0286785,FBGN0005427,FBGN0266084,FBGN0015513,FBGN0035802,FBGN0032006,FBGN0260442,FBGN0265598,FBGN0000711,FBGN0052062,FBGN0000577,FBGN0001297,FBGN0025879,FBGN0015371,FBGN0262699,FBGN0261836,FBGN0259678,FBGN0028369,FBGN0052666,FBGN0261988,FBGN0263289,FBGN0015615,FBGN0000490,FBGN0024244,FBGN0026411,FBGN0283521,FBGN0003175,FBGN0036801,FBG…
GO:BP	cell-cell adhesion via plasma-membrane adhesion molecules	GO:0098742	7.028727181866562e-11	10.153123313378401	74	472	22	11798	FBGN0053179,FBGN0033159,FBGN0039584,FBGN0286785,FBGN0000163,FBGN0038498,FBGN0265002,FBGN0021764,FBGN0000464,FBGN0263219,FBGN0028369,FBGN0028482,FBGN0024836,FBGN0001085,FBGN0028644,FBGN0000635,FBGN0017590,FBGN0015609,FBGN0001257,FBGN0265296,FBGN0039089,FBGN0000547
GO:BP	instar larval or pupal morphogenesis	GO:0048707	1.698097863944788e-10	9.770037284323836	456	472	55	11798	FBGN0038755,FBGN0003090,FBGN0264442,FBGN0014343,FBGN0285955,FBGN0005427,FBGN0266084,FBGN0015513,FBGN0035802,FBGN0032006,FBGN0260442,FBGN0265598,FBGN0000567,FBGN0000711,FBGN0052062,FBGN0000577,FBGN0001297,FBGN0025879,FBGN0262699,FBGN0259678,FBGN0052666,FBGN0261988,FBGN0263289,FBGN0015615,FBGN0000490,FBGN0024244,FBGN0026411,FBGN0283521,FBGN0003175,FBGN0036801,FBGN0024836,FBGN0001085,FBGN0000635,FBG…
GO:BP	developmental cell growth	GO:0048588	3.14049379219756e-10	9.503002060727352	79	472	22	11798	FBGN0033159,FBGN0003090,FBGN0286785,FBGN0003380,FBGN0011260,FBGN0001297,FBGN0284221,FBGN0000464,FBGN0028482,FBGN0011259,FBGN0015269,FBGN0085443,FBGN0024836,FBGN0001085,FBGN0015609,FBGN0016059,FBGN0010113,FBGN0264975,FBGN0003301,FBGN0041092,FBGN0000479,FBGN0016797
GO:BP	metamorphosis	GO:0007552	5.290158120971511e-10	9.276531346861011	483	472	56	11798	FBGN0038755,FBGN0003090,FBGN0264442,FBGN0005640,FBGN0014343,FBGN0285955,FBGN0005427,FBGN0266084,FBGN0015513,FBGN0035802,FBGN0032006,FBGN0260442,FBGN0265598,FBGN0000567,FBGN0000711,FBGN0052062,FBGN0000577,FBGN0001297,FBGN0025879,FBGN0262699,FBGN0259678,FBGN0052666,FBGN0261988,FBGN0263289,FBGN0015615,FBGN0000490,FBGN0024244,FBGN0026411,FBGN0283521,FBGN0003175,FBGN0036801,FBGN0024836,FBGN0001085,FBG…
GO:BP	axon extension	GO:0048675	2.2331849596219566e-9	8.65107530576124	55	472	18	11798	FBGN0033159,FBGN0003090,FBGN0003380,FBGN0011260,FBGN0284221,FBGN0000464,FBGN0011259,FBGN0085443,FBGN0024836,FBGN0001085,FBGN0015609,FBGN0016059,FBGN0010113,FBGN0264975,FBGN0003301,FBGN0041092,FBGN0000479,FBGN0016797
GO:BP	cell junction organization	GO:0034330	3.21716382440115e-9	8.492526823393371	376	472	47	11798	FBGN0085420,FBGN0085414,FBGN0034286,FBGN0261871,FBGN0262614,FBGN0004509,FBGN0011676,FBGN0266098,FBGN0286785,FBGN0038826,FBGN0042693,FBGN0000163,FBGN0005427,FBGN0051004,FBGN0030600,FBGN0001297,FBGN0265416,FBGN0053094,FBGN0000464,FBGN0266464,FBGN0261873,FBGN0266756,FBGN0028369,FBGN0037993,FBGN0263289,FBGN0011259,FBGN0051708,FBGN0015269,FBGN0024836,FBGN0000635,FBGN0011225,FBGN0017590,FBGN0028991,FBG…
GO:BP	neuron projection extension	GO:1990138	6.23890061485035e-9	8.20489193258824	58	472	18	11798	FBGN0033159,FBGN0003090,FBGN0003380,FBGN0011260,FBGN0284221,FBGN0000464,FBGN0011259,FBGN0085443,FBGN0024836,FBGN0001085,FBGN0015609,FBGN0016059,FBGN0010113,FBGN0264975,FBGN0003301,FBGN0041092,FBGN0000479,FBGN0016797
GO:BP	imaginal disc-derived appendage development	GO:0048737	1.524857164412677e-8	7.816770835407458	351	472	44	11798	FBGN0038755,FBGN0003090,FBGN0264442,FBGN0014343,FBGN0034903,FBGN0285955,FBGN0266084,FBGN0035802,FBGN0260442,FBGN0265598,FBGN0000711,FBGN0052062,FBGN0000577,FBGN0025879,FBGN0052666,FBGN0261988,FBGN0263289,FBGN0015615,FBGN0000490,FBGN0024244,FBGN0026411,FBGN0283521,FBGN0003175,FBGN0036801,FBGN0024836,FBGN0001085,FBGN0004607,FBGN0039286,FBGN0260003,FBGN0004652,FBGN0001084,FBGN0259734,FBGN0285917,FBG…
GO:BP	developmental growth	GO:0048589	2.077956997413249e-8	7.682363444256886	382	472	46	11798	FBGN0033159,FBGN0038755,FBGN0003090,FBGN0005640,FBGN0011676,FBGN0259176,FBGN0286785,FBGN0003380,FBGN0038826,FBGN0000163,FBGN0005427,FBGN0264562,FBGN0011260,FBGN0030600,FBGN0001297,FBGN0284221,FBGN0053094,FBGN0025879,FBGN0000464,FBGN0266464,FBGN0003089,FBGN0266756,FBGN0028482,FBGN0263289,FBGN0011259,FBGN0000490,FBGN0015269,FBGN0085443,FBGN0024836,FBGN0001085,FBGN0000635,FBGN0032840,FBGN0015609,FBG…
GO:BP	appendage development	GO:0048736	2.238676894485306e-8	7.65000858309267	355	472	44	11798	FBGN0038755,FBGN0003090,FBGN0264442,FBGN0014343,FBGN0034903,FBGN0285955,FBGN0266084,FBGN0035802,FBGN0260442,FBGN0265598,FBGN0000711,FBGN0052062,FBGN0000577,FBGN0025879,FBGN0052666,FBGN0261988,FBGN0263289,FBGN0015615,FBGN0000490,FBGN0024244,FBGN0026411,FBGN0283521,FBGN0003175,FBGN0036801,FBGN0024836,FBGN0001085,FBGN0004607,FBGN0039286,FBGN0260003,FBGN0004652,FBGN0001084,FBGN0259734,FBGN0285917,FBG…
GO:BP	imaginal disc-derived appendage morphogenesis	GO:0035114	2.907973683849742e-8	7.536409528009202	344	472	43	11798	FBGN0038755,FBGN0003090,FBGN0264442,FBGN0014343,FBGN0285955,FBGN0266084,FBGN0035802,FBGN0260442,FBGN0265598,FBGN0000711,FBGN0052062,FBGN0000577,FBGN0025879,FBGN0052666,FBGN0261988,FBGN0263289,FBGN0015615,FBGN0000490,FBGN0024244,FBGN0026411,FBGN0283521,FBGN0003175,FBGN0036801,FBGN0024836,FBGN0001085,FBGN0004607,FBGN0039286,FBGN0260003,FBGN0004652,FBGN0001084,FBGN0259734,FBGN0285917,FBGN0259789,FBG…
GO:BP	appendage morphogenesis	GO:0035107	3.8755015796435626e-8	7.411672081757803	347	472	43	11798	FBGN0038755,FBGN0003090,FBGN0264442,FBGN0014343,FBGN0285955,FBGN0266084,FBGN0035802,FBGN0260442,FBGN0265598,FBGN0000711,FBGN0052062,FBGN0000577,FBGN0025879,FBGN0052666,FBGN0261988,FBGN0263289,FBGN0015615,FBGN0000490,FBGN0024244,FBGN0026411,FBGN0283521,FBGN0003175,FBGN0036801,FBGN0024836,FBGN0001085,FBGN0004607,FBGN0039286,FBGN0260003,FBGN0004652,FBGN0001084,FBGN0259734,FBGN0285917,FBGN0259789,FBG…
GO:BP	post-embryonic appendage morphogenesis	GO:0035120	4.567405845809956e-8	7.340330396589907	335	472	42	11798	FBGN0038755,FBGN0003090,FBGN0264442,FBGN0014343,FBGN0285955,FBGN0266084,FBGN0035802,FBGN0260442,FBGN0265598,FBGN0000711,FBGN0052062,FBGN0000577,FBGN0025879,FBGN0052666,FBGN0261988,FBGN0263289,FBGN0015615,FBGN0000490,FBGN0024244,FBGN0026411,FBGN0283521,FBGN0003175,FBGN0036801,FBGN0024836,FBGN0001085,FBGN0004607,FBGN0260003,FBGN0004652,FBGN0001084,FBGN0259734,FBGN0285917,FBGN0259789,FBGN0263930,FBG…
GO:BP	growth	GO:0040007	9.617749611223372e-8	7.01692653355037	458	472	50	11798	FBGN0033159,FBGN0038755,FBGN0003090,FBGN0005640,FBGN0014343,FBGN0011676,FBGN0259176,FBGN0286785,FBGN0003380,FBGN0038826,FBGN0000163,FBGN0005427,FBGN0264562,FBGN0015513,FBGN0011260,FBGN0030600,FBGN0001297,FBGN0284221,FBGN0053094,FBGN0025879,FBGN0000464,FBGN0266464,FBGN0003089,FBGN0266411,FBGN0266756,FBGN0028482,FBGN0263289,FBGN0011259,FBGN0000490,FBGN0015269,FBGN0085443,FBGN0024836,FBGN0001085,FBG…
GO:BP	neuron recognition	GO:0008038	2.1754240250515696e-7	6.662456079494698	117	472	23	11798	FBGN0085414,FBGN0033159,FBGN0036899,FBGN0264442,FBGN0004509,FBGN0011260,FBGN0265002,FBGN0263219,FBGN0028482,FBGN0052373,FBGN0011259,FBGN0283521,FBGN0024836,FBGN0028644,FBGN0000635,FBGN0051721,FBGN0015609,FBGN0004652,FBGN0001257,FBGN0033791,FBGN0265296,FBGN0004369,FBGN0016797
GO:BP	developmental growth involved in morphogenesis	GO:0060560	2.1835149007126744e-7	6.660843840026034	107	472	22	11798	FBGN0033159,FBGN0003090,FBGN0286785,FBGN0003380,FBGN0000163,FBGN0011260,FBGN0001297,FBGN0284221,FBGN0025879,FBGN0000464,FBGN0011259,FBGN0085443,FBGN0024836,FBGN0001085,FBGN0015609,FBGN0016059,FBGN0010113,FBGN0264975,FBGN0003301,FBGN0041092,FBGN0000479,FBGN0016797
GO:BP	homophilic cell adhesion via plasma membrane adhesion molecules	GO:0007156	3.411872852513628e-7	6.467007161701647	48	472	15	11798	FBGN0033159,FBGN0265002,FBGN0021764,FBGN0000464,FBGN0263219,FBGN0028369,FBGN0028482,FBGN0024836,FBGN0001085,FBGN0000635,FBGN0017590,FBGN0015609,FBGN0001257,FBGN0265296,FBGN0000547
GO:BP	imaginal disc-derived wing morphogenesis	GO:0007476	3.875342306863976e-7	6.411689930469585	289	472	37	11798	FBGN0038755,FBGN0003090,FBGN0264442,FBGN0014343,FBGN0285955,FBGN0266084,FBGN0260442,FBGN0265598,FBGN0000711,FBGN0052062,FBGN0000577,FBGN0025879,FBGN0052666,FBGN0261988,FBGN0263289,FBGN0015615,FBGN0000490,FBGN0283521,FBGN0003175,FBGN0036801,FBGN0024836,FBGN0001085,FBGN0004607,FBGN0260003,FBGN0004652,FBGN0001084,FBGN0259734,FBGN0285917,FBGN0259789,FBGN0263930,FBGN0020307,FBGN0034072,FBGN0265778,FBG…
GO:BP	cell recognition	GO:0008037	5.233584812460473e-7	6.281200733512999	122	472	23	11798	FBGN0085414,FBGN0033159,FBGN0036899,FBGN0264442,FBGN0004509,FBGN0011260,FBGN0265002,FBGN0263219,FBGN0028482,FBGN0052373,FBGN0011259,FBGN0283521,FBGN0024836,FBGN0028644,FBGN0000635,FBGN0051721,FBGN0015609,FBGN0004652,FBGN0001257,FBGN0033791,FBGN0265296,FBGN0004369,FBGN0016797
GO:BP	wing disc morphogenesis	GO:0007472	0.0000010236267355976562	5.98985837951512	299	472	37	11798	FBGN0038755,FBGN0003090,FBGN0264442,FBGN0014343,FBGN0285955,FBGN0266084,FBGN0260442,FBGN0265598,FBGN0000711,FBGN0052062,FBGN0000577,FBGN0025879,FBGN0052666,FBGN0261988,FBGN0263289,FBGN0015615,FBGN0000490,FBGN0283521,FBGN0003175,FBGN0036801,FBGN0024836,FBGN0001085,FBGN0004607,FBGN0260003,FBGN0004652,FBGN0001084,FBGN0259734,FBGN0285917,FBGN0259789,FBGN0263930,FBGN0020307,FBGN0034072,FBGN0265778,FBG…
GO:BP	motor neuron axon guidance	GO:0008045	0.0000014025676560010083	5.853076180396774	78	472	18	11798	FBGN0053179,FBGN0039584,FBGN0038498,FBGN0000464,FBGN0004370,FBGN0260660,FBGN0011259,FBGN0016061,FBGN0028644,FBGN0000635,FBGN0002023,FBGN0263930,FBGN0264975,FBGN0033791,FBGN0039089,FBGN0014141,FBGN0004369,FBGN0016797
GO:BP	sensory system development	GO:0048880	0.0000017928379937324314	5.746458952828695	406	472	44	11798	FBGN0034049,FBGN0265487,FBGN0003090,FBGN0262614,FBGN0031414,FBGN0014343,FBGN0031745,FBGN0002573,FBGN0259176,FBGN0013272,FBGN0266098,FBGN0000097,FBGN0001297,FBGN0011666,FBGN0021764,FBGN0000464,FBGN0015371,FBGN0262699,FBGN0025360,FBGN0028369,FBGN0028482,FBGN0263289,FBGN0261649,FBGN0000490,FBGN0026411,FBGN0283521,FBGN0003720,FBGN0024836,FBGN0260486,FBGN0001085,FBGN0000635,FBGN0017590,FBGN0028991,FBG…
GO:BP	eye development	GO:0001654	0.0000017928379937324314	5.746458952828695	406	472	44	11798	FBGN0034049,FBGN0265487,FBGN0003090,FBGN0262614,FBGN0031414,FBGN0014343,FBGN0031745,FBGN0002573,FBGN0259176,FBGN0013272,FBGN0266098,FBGN0000097,FBGN0001297,FBGN0011666,FBGN0021764,FBGN0000464,FBGN0015371,FBGN0262699,FBGN0025360,FBGN0028369,FBGN0028482,FBGN0263289,FBGN0261649,FBGN0000490,FBGN0026411,FBGN0283521,FBGN0003720,FBGN0024836,FBGN0260486,FBGN0001085,FBGN0000635,FBGN0017590,FBGN0028991,FBG…
GO:BP	visual system development	GO:0150063	0.0000017928379937324314	5.746458952828695	406	472	44	11798	FBGN0034049,FBGN0265487,FBGN0003090,FBGN0262614,FBGN0031414,FBGN0014343,FBGN0031745,FBGN0002573,FBGN0259176,FBGN0013272,FBGN0266098,FBGN0000097,FBGN0001297,FBGN0011666,FBGN0021764,FBGN0000464,FBGN0015371,FBGN0262699,FBGN0025360,FBGN0028369,FBGN0028482,FBGN0263289,FBGN0261649,FBGN0000490,FBGN0026411,FBGN0283521,FBGN0003720,FBGN0024836,FBGN0260486,FBGN0001085,FBGN0000635,FBGN0017590,FBGN0028991,FBG…
GO:BP	sensory organ development	GO:0007423	0.0000035361426903019986	5.451470218670146	492	472	49	11798	FBGN0034049,FBGN0038755,FBGN0265487,FBGN0003090,FBGN0262614,FBGN0264442,FBGN0031414,FBGN0014343,FBGN0031745,FBGN0002573,FBGN0259176,FBGN0013272,FBGN0266098,FBGN0000097,FBGN0265598,FBGN0001297,FBGN0011666,FBGN0021764,FBGN0000464,FBGN0015371,FBGN0262699,FBGN0025360,FBGN0028369,FBGN0028482,FBGN0263289,FBGN0261649,FBGN0000490,FBGN0026411,FBGN0283521,FBGN0040296,FBGN0003720,FBGN0024836,FBGN0260486,FBG…
GO:BP	cell growth	GO:0016049	0.000003674453025934486	5.434807300252722	157	472	25	11798	FBGN0033159,FBGN0003090,FBGN0259176,FBGN0286785,FBGN0003380,FBGN0011260,FBGN0001297,FBGN0284221,FBGN0000464,FBGN0266411,FBGN0028482,FBGN0011259,FBGN0015269,FBGN0085443,FBGN0024836,FBGN0001085,FBGN0015609,FBGN0016059,FBGN0010113,FBGN0264975,FBGN0003301,FBGN0262582,FBGN0041092,FBGN0000479,FBGN0016797
GO:BP	wing disc development	GO:0035220	0.000007641553978051139	5.11681831479262	395	472	42	11798	FBGN0038755,FBGN0003090,FBGN0262614,FBGN0264442,FBGN0020306,FBGN0014343,FBGN0285955,FBGN0266084,FBGN0260442,FBGN0265598,FBGN0000711,FBGN0052062,FBGN0000577,FBGN0001297,FBGN0025879,FBGN0052666,FBGN0261988,FBGN0263289,FBGN0015615,FBGN0000490,FBGN0283521,FBGN0003175,FBGN0040071,FBGN0036801,FBGN0024836,FBGN0001085,FBGN0004607,FBGN0260003,FBGN0004652,FBGN0001084,FBGN0259734,FBGN0285917,FBGN0005613,FBG…
GO:BP	positive regulation of cellular component movement	GO:0051272	0.00001035874167040211	4.984692997369902	78	472	17	11798	FBGN0033159,FBGN0003090,FBGN0014073,FBGN0266084,FBGN0015513,FBGN0011260,FBGN0032006,FBGN0000097,FBGN0031888,FBGN0001297,FBGN0284221,FBGN0011259,FBGN0085443,FBGN0024836,FBGN0001085,FBGN0016059,FBGN0041092
GO:BP	sensory organ morphogenesis	GO:0090596	0.000011233061631046594	4.949501858319917	326	472	37	11798	FBGN0034049,FBGN0265487,FBGN0003090,FBGN0262614,FBGN0031414,FBGN0014343,FBGN0031745,FBGN0002573,FBGN0259176,FBGN0266098,FBGN0000097,FBGN0001297,FBGN0011666,FBGN0021764,FBGN0000464,FBGN0015371,FBGN0262699,FBGN0025360,FBGN0028369,FBGN0028482,FBGN0263289,FBGN0261649,FBGN0000490,FBGN0283521,FBGN0003720,FBGN0024836,FBGN0001085,FBGN0000635,FBGN0017590,FBGN0028991,FBGN0015609,FBGN0086361,FBGN0004595,FBG…
GO:BP	eye morphogenesis	GO:0048592	0.000011233061631046594	4.949501858319917	326	472	37	11798	FBGN0034049,FBGN0265487,FBGN0003090,FBGN0262614,FBGN0031414,FBGN0014343,FBGN0031745,FBGN0002573,FBGN0259176,FBGN0266098,FBGN0000097,FBGN0001297,FBGN0011666,FBGN0021764,FBGN0000464,FBGN0015371,FBGN0262699,FBGN0025360,FBGN0028369,FBGN0028482,FBGN0263289,FBGN0261649,FBGN0000490,FBGN0283521,FBGN0003720,FBGN0024836,FBGN0001085,FBGN0000635,FBGN0017590,FBGN0028991,FBGN0015609,FBGN0086361,FBGN0004595,FBG…
GO:BP	regulation of locomotion	GO:0040012	0.00001227833554787784	4.910860502198554	120	472	21	11798	FBGN0033159,FBGN0003090,FBGN0014073,FBGN0286785,FBGN0266084,FBGN0015513,FBGN0011260,FBGN0032006,FBGN0000097,FBGN0031888,FBGN0001297,FBGN0284221,FBGN0266411,FBGN0011259,FBGN0283521,FBGN0085443,FBGN0024836,FBGN0001085,FBGN0051721,FBGN0016059,FBGN0041092
GO:BP	synapse organization	GO:0050808	0.000018256311007807618	4.738586974381591	303	472	35	11798	FBGN0085420,FBGN0085414,FBGN0034286,FBGN0261871,FBGN0004509,FBGN0011676,FBGN0266098,FBGN0286785,FBGN0038826,FBGN0042693,FBGN0000163,FBGN0005427,FBGN0030600,FBGN0001297,FBGN0265416,FBGN0053094,FBGN0000464,FBGN0266464,FBGN0037993,FBGN0011259,FBGN0051708,FBGN0015269,FBGN0024836,FBGN0000635,FBGN0017590,FBGN0025726,FBGN0004595,FBGN0010905,FBGN0264975,FBGN0003301,FBGN0003429,FBGN0052600,FBGN0259822,FBG…
GO:BP	photoreceptor cell differentiation	GO:0046530	0.00002149189870035482	4.667725215096671	222	472	29	11798	FBGN0034049,FBGN0265487,FBGN0031414,FBGN0031745,FBGN0002573,FBGN0259176,FBGN0266098,FBGN0000163,FBGN0000097,FBGN0001297,FBGN0011666,FBGN0021764,FBGN0000464,FBGN0025360,FBGN0261873,FBGN0028482,FBGN0263289,FBGN0261649,FBGN0000490,FBGN0283521,FBGN0024836,FBGN0001085,FBGN0017590,FBGN0028991,FBGN0015609,FBGN0086361,FBGN0004595,FBGN0265778,FBGN0000547
GO:BP	compound eye development	GO:0048749	0.00002752396259562765	4.560289041020513	382	472	40	11798	FBGN0034049,FBGN0265487,FBGN0003090,FBGN0262614,FBGN0031414,FBGN0014343,FBGN0031745,FBGN0002573,FBGN0259176,FBGN0013272,FBGN0266098,FBGN0000097,FBGN0001297,FBGN0011666,FBGN0021764,FBGN0000464,FBGN0015371,FBGN0262699,FBGN0025360,FBGN0028369,FBGN0028482,FBGN0263289,FBGN0000490,FBGN0026411,FBGN0283521,FBGN0024836,FBGN0260486,FBGN0001085,FBGN0017590,FBGN0028991,FBGN0051721,FBGN0003963,FBGN0015609,FBG…
GO:BP	positive regulation of cell migration	GO:0030335	0.000054514213416139375	4.263490249954285	58	472	14	11798	FBGN0033159,FBGN0014073,FBGN0266084,FBGN0015513,FBGN0011260,FBGN0032006,FBGN0000097,FBGN0031888,FBGN0001297,FBGN0284221,FBGN0011259,FBGN0085443,FBGN0016059,FBGN0041092
GO:BP	regulation of cellular component movement	GO:0051270	0.00005611470523962122	4.250923314010342	119	472	20	11798	FBGN0033159,FBGN0003090,FBGN0014073,FBGN0286785,FBGN0266084,FBGN0015513,FBGN0011260,FBGN0032006,FBGN0000097,FBGN0031888,FBGN0001297,FBGN0284221,FBGN0266411,FBGN0011259,FBGN0283521,FBGN0085443,FBGN0024836,FBGN0001085,FBGN0016059,FBGN0041092
GO:BP	regulation of growth	GO:0040008	0.00009261786162767914	4.03330525026957	323	472	35	11798	FBGN0038755,FBGN0003090,FBGN0014343,FBGN0011676,FBGN0259176,FBGN0286785,FBGN0038826,FBGN0005427,FBGN0264562,FBGN0015513,FBGN0011260,FBGN0030600,FBGN0284221,FBGN0053094,FBGN0000464,FBGN0266464,FBGN0003089,FBGN0266411,FBGN0266756,FBGN0263289,FBGN0011259,FBGN0000490,FBGN0015269,FBGN0024836,FBGN0001085,FBGN0000635,FBGN0032840,FBGN0015609,FBGN0016059,FBGN0285917,FBGN0263930,FBGN0262582,FBGN0003429,FBG…
GO:BP	regulation of developmental growth	GO:0048638	0.00011170716685486706	3.951918962733332	239	472	29	11798	FBGN0038755,FBGN0003090,FBGN0011676,FBGN0286785,FBGN0038826,FBGN0005427,FBGN0264562,FBGN0011260,FBGN0030600,FBGN0284221,FBGN0053094,FBGN0000464,FBGN0266464,FBGN0003089,FBGN0266756,FBGN0263289,FBGN0011259,FBGN0000490,FBGN0015269,FBGN0024836,FBGN0001085,FBGN0000635,FBGN0032840,FBGN0015609,FBGN0016059,FBGN0285917,FBGN0263930,FBGN0003429,FBGN0003944
GO:BP	eye photoreceptor cell differentiation	GO:0001754	0.0001187683867839779	3.925299142455258	199	472	26	11798	FBGN0034049,FBGN0265487,FBGN0031414,FBGN0031745,FBGN0002573,FBGN0259176,FBGN0266098,FBGN0000097,FBGN0001297,FBGN0011666,FBGN0000464,FBGN0025360,FBGN0028482,FBGN0263289,FBGN0261649,FBGN0000490,FBGN0283521,FBGN0024836,FBGN0001085,FBGN0017590,FBGN0028991,FBGN0015609,FBGN0086361,FBGN0004595,FBGN0265778,FBGN0000547
GO:BP	positive regulation of cell motility	GO:2000147	0.0001349134993179893	3.869944593056077	62	472	14	11798	FBGN0033159,FBGN0014073,FBGN0266084,FBGN0015513,FBGN0011260,FBGN0032006,FBGN0000097,FBGN0031888,FBGN0001297,FBGN0284221,FBGN0011259,FBGN0085443,FBGN0016059,FBGN0041092
GO:BP	cell migration	GO:0016477	0.00019757250843579444	3.704273486192021	318	472	34	11798	FBGN0033159,FBGN0051660,FBGN0264442,FBGN0014073,FBGN0259176,FBGN0083940,FBGN0286785,FBGN0286071,FBGN0000163,FBGN0266084,FBGN0015513,FBGN0011260,FBGN0032006,FBGN0260442,FBGN0000097,FBGN0031888,FBGN0001297,FBGN0284221,FBGN0000464,FBGN0030499,FBGN0262699,FBGN0261836,FBGN0266411,FBGN0011259,FBGN0000490,FBGN0085443,FBGN0001085,FBGN0011225,FBGN0016059,FBGN0263930,FBGN0265778,FBGN0039232,FBGN0041092,FBG…
GO:BP	regulation of cell migration	GO:0030334	0.0002509072768712551	3.600486742993069	85	472	16	11798	FBGN0033159,FBGN0014073,FBGN0286785,FBGN0266084,FBGN0015513,FBGN0011260,FBGN0032006,FBGN0000097,FBGN0031888,FBGN0001297,FBGN0284221,FBGN0266411,FBGN0011259,FBGN0085443,FBGN0016059,FBGN0041092
GO:BP	positive regulation of locomotion	GO:0040017	0.0003100685425671293	3.508542292074518	66	472	14	11798	FBGN0033159,FBGN0014073,FBGN0266084,FBGN0015513,FBGN0011260,FBGN0032006,FBGN0000097,FBGN0031888,FBGN0001297,FBGN0284221,FBGN0011259,FBGN0085443,FBGN0016059,FBGN0041092
GO:BP	dendrite self-avoidance	GO:0070593	0.00038638845676486577	3.4129758564755006	19	472	8	11798	FBGN0033159,FBGN0265002,FBGN0263219,FBGN0028482,FBGN0024836,FBGN0000635,FBGN0001257,FBGN0265296
GO:BP	compound eye morphogenesis	GO:0001745	0.0004501786016431049	3.346615152181311	314	472	33	11798	FBGN0034049,FBGN0265487,FBGN0003090,FBGN0262614,FBGN0031414,FBGN0014343,FBGN0031745,FBGN0002573,FBGN0259176,FBGN0266098,FBGN0000097,FBGN0001297,FBGN0011666,FBGN0021764,FBGN0000464,FBGN0015371,FBGN0262699,FBGN0025360,FBGN0028369,FBGN0028482,FBGN0263289,FBGN0000490,FBGN0283521,FBGN0024836,FBGN0001085,FBGN0017590,FBGN0028991,FBGN0015609,FBGN0086361,FBGN0004595,FBGN0265778,FBGN0264493,FBGN0000547
GO:BP	regulation of cell motility	GO:2000145	0.0004855866678089884	3.3137332456899515	89	472	16	11798	FBGN0033159,FBGN0014073,FBGN0286785,FBGN0266084,FBGN0015513,FBGN0011260,FBGN0032006,FBGN0000097,FBGN0031888,FBGN0001297,FBGN0284221,FBGN0266411,FBGN0011259,FBGN0085443,FBGN0016059,FBGN0041092
GO:BP	R3/R4 cell fate commitment	GO:0007464	0.000514559619163497	3.288564298698113	14	472	7	11798	FBGN0034049,FBGN0000097,FBGN0001297,FBGN0263289,FBGN0283521,FBGN0024836,FBGN0001085
GO:BP	morphogenesis of a polarized epithelium	GO:0001738	0.0007047030832492697	3.1519938283534272	126	472	19	11798	FBGN0034049,FBGN0003090,FBGN0014343,FBGN0000163,FBGN0000097,FBGN0001297,FBGN0261873,FBGN0266756,FBGN0263289,FBGN0015615,FBGN0283521,FBGN0024836,FBGN0001085,FBGN0015609,FBGN0001084,FBGN0264542,FBGN0263258,FBGN0264493,FBGN0000547
GO:BP	stem cell development	GO:0048864	0.0007105090542218162	3.148430383361398	6	472	5	11798	FBGN0011260,FBGN0284221,FBGN0011259,FBGN0260943,FBGN0016059
GO:BP	regulation of axon extension	GO:0030516	0.0007306255541016803	3.136305142127842	27	472	9	11798	FBGN0003090,FBGN0011260,FBGN0284221,FBGN0000464,FBGN0011259,FBGN0024836,FBGN0001085,FBGN0015609,FBGN0016059
GO:BP	regulation of extent of cell growth	GO:0061387	0.0007306255541016803	3.136305142127842	27	472	9	11798	FBGN0003090,FBGN0011260,FBGN0284221,FBGN0000464,FBGN0011259,FBGN0024836,FBGN0001085,FBGN0015609,FBGN0016059
GO:BP	cell junction assembly	GO:0034329	0.0007913742751471607	3.1016180712587933	233	472	27	11798	FBGN0262614,FBGN0011676,FBGN0286785,FBGN0038826,FBGN0000163,FBGN0005427,FBGN0051004,FBGN0030600,FBGN0001297,FBGN0053094,FBGN0000464,FBGN0266464,FBGN0261873,FBGN0266756,FBGN0028369,FBGN0263289,FBGN0011259,FBGN0015269,FBGN0024836,FBGN0000635,FBGN0028991,FBGN0004595,FBGN0010905,FBGN0264975,FBGN0265778,FBGN0003429,FBGN0085387
GO:BP	establishment of tissue polarity	GO:0007164	0.000795111590477764	3.099571915711113	115	472	18	11798	FBGN0034049,FBGN0003090,FBGN0014343,FBGN0000163,FBGN0000097,FBGN0001297,FBGN0266756,FBGN0263289,FBGN0015615,FBGN0283521,FBGN0024836,FBGN0001085,FBGN0015609,FBGN0001084,FBGN0264542,FBGN0263258,FBGN0264493,FBGN0000547
GO:BP	establishment of planar polarity	GO:0001736	0.000795111590477764	3.099571915711113	115	472	18	11798	FBGN0034049,FBGN0003090,FBGN0014343,FBGN0000163,FBGN0000097,FBGN0001297,FBGN0266756,FBGN0263289,FBGN0015615,FBGN0283521,FBGN0024836,FBGN0001085,FBGN0015609,FBGN0001084,FBGN0264542,FBGN0263258,FBGN0264493,FBGN0000547
GO:BP	compound eye photoreceptor cell differentiation	GO:0001751	0.0008458623396249385	3.0727003107267996	192	472	24	11798	FBGN0034049,FBGN0265487,FBGN0031414,FBGN0031745,FBGN0002573,FBGN0259176,FBGN0000097,FBGN0001297,FBGN0011666,FBGN0000464,FBGN0025360,FBGN0028482,FBGN0263289,FBGN0000490,FBGN0283521,FBGN0024836,FBGN0001085,FBGN0017590,FBGN0028991,FBGN0015609,FBGN0086361,FBGN0004595,FBGN0265778,FBGN0000547
GO:BP	regulation of anatomical structure morphogenesis	GO:0022603	0.0012343332520581953	2.9085675712665027	196	472	24	11798	FBGN0033159,FBGN0003090,FBGN0262614,FBGN0051660,FBGN0285955,FBGN0000163,FBGN0266084,FBGN0011260,FBGN0000097,FBGN0265598,FBGN0010497,FBGN0284221,FBGN0011259,FBGN0000490,FBGN0024836,FBGN0001085,FBGN0051721,FBGN0015609,FBGN0016059,FBGN0264542,FBGN0004595,FBGN0265778,FBGN0000547,FBGN0016797
GO:BP	R3/R4 cell differentiation	GO:0048056	0.001599299956990558	2.7960700744347107	16	472	7	11798	FBGN0034049,FBGN0000097,FBGN0001297,FBGN0263289,FBGN0283521,FBGN0024836,FBGN0001085
GO:BP	cell motility	GO:0048870	0.0016464164860232	2.7834602938492217	380	472	36	11798	FBGN0033159,FBGN0051660,FBGN0264442,FBGN0014073,FBGN0259176,FBGN0083960,FBGN0083940,FBGN0286785,FBGN0286071,FBGN0000163,FBGN0266084,FBGN0015513,FBGN0011260,FBGN0032006,FBGN0260442,FBGN0000097,FBGN0031888,FBGN0001297,FBGN0284221,FBGN0000464,FBGN0030499,FBGN0262699,FBGN0261836,FBGN0266411,FBGN0011259,FBGN0000490,FBGN0085443,FBGN0001085,FBGN0011225,FBGN0016059,FBGN0083946,FBGN0263930,FBGN0265778,FBG…
GO:BP	embryonic development via the syncytial blastoderm	GO:0001700	0.0016689149623708248	2.7775657917293732	172	472	22	11798	FBGN0262614,FBGN0005640,FBGN0014343,FBGN0285955,FBGN0286785,FBGN0015513,FBGN0032006,FBGN0260442,FBGN0000097,FBGN0001297,FBGN0284221,FBGN0050085,FBGN0015371,FBGN0028369,FBGN0263289,FBGN0000490,FBGN0011225,FBGN0003963,FBGN0016059,FBGN0086361,FBGN0265778,FBGN0000547
GO:BP	regulation of axon extension involved in axon guidance	GO:0048841	0.0018862469609221995	2.7244014469410893	11	472	6	11798	FBGN0011260,FBGN0284221,FBGN0000464,FBGN0011259,FBGN0015609,FBGN0016059
GO:BP	localization of cell	GO:0051674	0.0022385434129125587	2.650034478762982	385	472	36	11798	FBGN0033159,FBGN0051660,FBGN0264442,FBGN0014073,FBGN0259176,FBGN0083960,FBGN0083940,FBGN0286785,FBGN0286071,FBGN0000163,FBGN0266084,FBGN0015513,FBGN0011260,FBGN0032006,FBGN0260442,FBGN0000097,FBGN0031888,FBGN0001297,FBGN0284221,FBGN0000464,FBGN0030499,FBGN0262699,FBGN0261836,FBGN0266411,FBGN0011259,FBGN0000490,FBGN0085443,FBGN0001085,FBGN0011225,FBGN0016059,FBGN0083946,FBGN0263930,FBGN0265778,FBG…
GO:BP	neuron projection extension involved in neuron projection guidance	GO:1902284	0.0026254195701703635	2.580801281801312	17	472	7	11798	FBGN0033159,FBGN0011260,FBGN0284221,FBGN0000464,FBGN0011259,FBGN0015609,FBGN0016059
GO:BP	axon extension involved in axon guidance	GO:0048846	0.0026254195701703635	2.580801281801312	17	472	7	11798	FBGN0033159,FBGN0011260,FBGN0284221,FBGN0000464,FBGN0011259,FBGN0015609,FBGN0016059
GO:BP	regulation of axonogenesis	GO:0050770	0.0033485097047832573	2.475148438036534	49	472	11	11798	FBGN0033159,FBGN0003090,FBGN0011260,FBGN0284221,FBGN0011259,FBGN0024836,FBGN0001085,FBGN0051721,FBGN0016059,FBGN0004595,FBGN0016797
GO:BP	negative regulation of developmental process	GO:0051093	0.0036038520471961782	2.443233046884215	237	472	26	11798	FBGN0259176,FBGN0286785,FBGN0038826,FBGN0005427,FBGN0011260,FBGN0000097,FBGN0030600,FBGN0021764,FBGN0284221,FBGN0085450,FBGN0015371,FBGN0263289,FBGN0011259,FBGN0000490,FBGN0015269,FBGN0000250,FBGN0000635,FBGN0003963,FBGN0015609,FBGN0016059,FBGN0086361,FBGN0004595,FBGN0010905,FBGN0010113,FBGN0014141,FBGN0000547
GO:BP	negative regulation of cell differentiation	GO:0045596	0.003924234997115473	2.406244993418833	128	472	18	11798	FBGN0259176,FBGN0011260,FBGN0000097,FBGN0021764,FBGN0284221,FBGN0085450,FBGN0015371,FBGN0011259,FBGN0000250,FBGN0000635,FBGN0003963,FBGN0015609,FBGN0016059,FBGN0086361,FBGN0004595,FBGN0010113,FBGN0014141,FBGN0000547
GO:BP	actin filament-based process	GO:0030029	0.0042068194376046995	2.376046128091105	331	472	32	11798	FBGN0052982,FBGN0264502,FBGN0051660,FBGN0004117,FBGN0285955,FBGN0083940,FBGN0266084,FBGN0015513,FBGN0260442,FBGN0000711,FBGN0035761,FBGN0052082,FBGN0261836,FBGN0266756,FBGN0261988,FBGN0032225,FBGN0264707,FBGN0266696,FBGN0001085,FBGN0011225,FBGN0029881,FBGN0028991,FBGN0010905,FBGN0086347,FBGN0265356,FBGN0034072,FBGN0014141,FBGN0085376,FBGN0052264,FBGN0086906,FBGN0000547,FBGN0263706
GO:BP	actin cytoskeleton organization	GO:0030036	0.004427618184889914	2.3538298375098807	316	472	31	11798	FBGN0052982,FBGN0264502,FBGN0051660,FBGN0004117,FBGN0285955,FBGN0083940,FBGN0266084,FBGN0015513,FBGN0260442,FBGN0000711,FBGN0035761,FBGN0052082,FBGN0261836,FBGN0266756,FBGN0032225,FBGN0264707,FBGN0266696,FBGN0001085,FBGN0011225,FBGN0029881,FBGN0028991,FBGN0010905,FBGN0086347,FBGN0265356,FBGN0034072,FBGN0014141,FBGN0085376,FBGN0052264,FBGN0086906,FBGN0000547,FBGN0263706
GO:BP	embryo development ending in birth or egg hatching	GO:0009792	0.004735812332608273	2.324605515855979	183	472	22	11798	FBGN0262614,FBGN0005640,FBGN0014343,FBGN0285955,FBGN0286785,FBGN0015513,FBGN0032006,FBGN0260442,FBGN0000097,FBGN0001297,FBGN0284221,FBGN0050085,FBGN0015371,FBGN0028369,FBGN0263289,FBGN0000490,FBGN0011225,FBGN0003963,FBGN0016059,FBGN0086361,FBGN0265778,FBGN0000547
GO:BP	ameboidal-type cell migration	GO:0001667	0.005612456689399076	2.2508469973699237	199	472	23	11798	FBGN0051660,FBGN0264442,FBGN0014073,FBGN0259176,FBGN0286071,FBGN0000163,FBGN0015513,FBGN0011260,FBGN0032006,FBGN0260442,FBGN0000097,FBGN0001297,FBGN0284221,FBGN0000464,FBGN0011259,FBGN0000490,FBGN0085443,FBGN0001085,FBGN0011225,FBGN0016059,FBGN0263930,FBGN0039232,FBGN0041092
GO:BP	epithelial cell differentiation	GO:0030855	0.0072745128795431505	2.13819608286568	422	472	37	11798	FBGN0003090,FBGN0051660,FBGN0264442,FBGN0014343,FBGN0014073,FBGN0259176,FBGN0038826,FBGN0000163,FBGN0015513,FBGN0032006,FBGN0260442,FBGN0000097,FBGN0001297,FBGN0000464,FBGN0261988,FBGN0263289,FBGN0015615,FBGN0000490,FBGN0000427,FBGN0085443,FBGN0024836,FBGN0015600,FBGN0001085,FBGN0040207,FBGN0000250,FBGN0011225,FBGN0025815,FBGN0029881,FBGN0003963,FBGN0001084,FBGN0259734,FBGN0039232,FBGN0262582,FBG…
GO:BP	establishment of ommatidial planar polarity	GO:0042067	0.007411948570960073	2.130067602767298	63	472	12	11798	FBGN0034049,FBGN0003090,FBGN0014343,FBGN0000097,FBGN0001297,FBGN0263289,FBGN0283521,FBGN0024836,FBGN0001085,FBGN0015609,FBGN0264493,FBGN0000547
GO:BP	morphogenesis of embryonic epithelium	GO:0016331	0.009320080382773608	2.0305803419760107	123	472	17	11798	FBGN0262614,FBGN0285955,FBGN0286785,FBGN0000163,FBGN0015513,FBGN0032006,FBGN0000097,FBGN0001297,FBGN0261873,FBGN0266756,FBGN0263289,FBGN0000490,FBGN0011225,FBGN0003963,FBGN0086361,FBGN0265778,FBGN0000547
GO:BP	cell fate specification	GO:0001708	0.012592394297204096	1.8998916860000232	113	472	16	11798	FBGN0262614,FBGN0259176,FBGN0000097,FBGN0015371,FBGN0263289,FBGN0000216,FBGN0000490,FBGN0003720,FBGN0001085,FBGN0028991,FBGN0003963,FBGN0004595,FBGN0002941,FBGN0003944,FBGN0000547,FBGN0016797
GO:BP	regulation of membrane potential	GO:0042391	0.014894804092235906	1.8269652045818974	102	472	15	11798	FBGN0285944,FBGN0053547,FBGN0003380,FBGN0015519,FBGN0039647,FBGN0032151,FBGN0000036,FBGN0028875,FBGN0029761,FBGN0026439,FBGN0086778,FBGN0261698,FBGN0003429,FBGN0259242,FBGN0085387
GO:BP	neuron fate commitment	GO:0048663	0.014894804092235906	1.8269652045818974	102	472	15	11798	FBGN0034049,FBGN0000097,FBGN0001297,FBGN0011666,FBGN0263289,FBGN0000490,FBGN0283521,FBGN0024836,FBGN0001085,FBGN0017590,FBGN0086361,FBGN0004595,FBGN0265778,FBGN0016797,FBGN0002643
GO:BP	compound eye photoreceptor fate commitment	GO:0001752	0.016395634384874087	1.7852717748152873	79	472	13	11798	FBGN0034049,FBGN0000097,FBGN0001297,FBGN0011666,FBGN0263289,FBGN0000490,FBGN0283521,FBGN0024836,FBGN0001085,FBGN0017590,FBGN0086361,FBGN0004595,FBGN0265778
GO:BP	R7 cell development	GO:0045467	0.017814081719979204	1.7492365597415072	15	472	6	11798	FBGN0031745,FBGN0000464,FBGN0028482,FBGN0283521,FBGN0028991,FBGN0015609
GO:BP	eye photoreceptor cell fate commitment	GO:0042706	0.018875729171516212	1.724096262530606	80	472	13	11798	FBGN0034049,FBGN0000097,FBGN0001297,FBGN0011666,FBGN0263289,FBGN0000490,FBGN0283521,FBGN0024836,FBGN0001085,FBGN0017590,FBGN0086361,FBGN0004595,FBGN0265778
GO:BP	muscle organ development	GO:0007517	0.021289179828264213	1.6718410695584014	105	472	15	11798	FBGN0265487,FBGN0264442,FBGN0005427,FBGN0015513,FBGN0260442,FBGN0261836,FBGN0028369,FBGN0000490,FBGN0260003,FBGN0004652,FBGN0034072,FBGN0002941,FBGN0003944,FBGN0086906,FBGN0000547
GO:BP	cell surface receptor signaling pathway involved in cell-cell signaling	GO:1905114	0.023498103212422072	1.6289671929463503	159	472	19	11798	FBGN0003090,FBGN0005640,FBGN0034903,FBGN0005427,FBGN0000097,FBGN0000711,FBGN0015519,FBGN0032151,FBGN0000036,FBGN0028875,FBGN0034709,FBGN0024836,FBGN0001085,FBGN0263930,FBGN0026439,FBGN0264078,FBGN0086778,FBGN0033791,FBGN0016797
GO:BP	semaphorin-plexin signaling pathway	GO:0071526	0.026101171089167756	1.5833400066021979	10	472	5	11798	FBGN0011260,FBGN0284221,FBGN0011259,FBGN0016059,FBGN0263930
GO:BP	negative regulation of axonogenesis	GO:0050771	0.026101171089167756	1.5833400066021979	10	472	5	11798	FBGN0011260,FBGN0284221,FBGN0011259,FBGN0016059,FBGN0004595
GO:BP	ovarian follicle cell development	GO:0030707	0.02675576279248203	1.5725826630099102	329	472	30	11798	FBGN0264442,FBGN0014343,FBGN0014073,FBGN0259176,FBGN0038826,FBGN0000163,FBGN0015513,FBGN0032006,FBGN0260442,FBGN0000097,FBGN0001297,FBGN0000464,FBGN0263289,FBGN0000490,FBGN0000427,FBGN0085443,FBGN0015600,FBGN0001085,FBGN0040207,FBGN0000250,FBGN0011225,FBGN0025815,FBGN0029881,FBGN0259734,FBGN0039232,FBGN0262582,FBGN0014141,FBGN0041092,FBGN0000547,FBGN0002643
GO:BP	enzyme linked receptor protein signaling pathway	GO:0007167	0.029233283025380172	1.5341224087362417	298	472	28	11798	FBGN0031745,FBGN0014073,FBGN0013272,FBGN0042693,FBGN0031016,FBGN0015513,FBGN0032006,FBGN0000097,FBGN0041210,FBGN0031888,FBGN0030600,FBGN0085450,FBGN0000464,FBGN0004370,FBGN0266411,FBGN0263289,FBGN0036368,FBGN0000490,FBGN0032752,FBGN0000635,FBGN0086361,FBGN0001257,FBGN0263930,FBGN0265778,FBGN0262582,FBGN0033791,FBGN0053531,FBGN0000547
GO:BP	memory	GO:0007613	0.03027523862164789	1.5189124251739592	121	472	16	11798	FBGN0042185,FBGN0028509,FBGN0266098,FBGN0286785,FBGN0041210,FBGN0052062,FBGN0030600,FBGN0004370,FBGN0263289,FBGN0015269,FBGN0000635,FBGN0017590,FBGN0003301,FBGN0014141,FBGN0265597,FBGN0000479
GO:BP	dendrite morphogenesis	GO:0048813	0.030652775297356317	1.5135301984127056	162	472	19	11798	FBGN0033159,FBGN0264442,FBGN0020306,FBGN0285955,FBGN0083981,FBGN0011260,FBGN0001297,FBGN0085450,FBGN0015371,FBGN0025360,FBGN0011259,FBGN0283521,FBGN0024836,FBGN0028991,FBGN0015609,FBGN0004652,FBGN0004595,FBGN0263930,FBGN0264975
GO:BP	epithelial cell development	GO:0002064	0.03139526042172489	1.503135910145081	365	472	32	11798	FBGN0051660,FBGN0264442,FBGN0014343,FBGN0014073,FBGN0259176,FBGN0038826,FBGN0000163,FBGN0015513,FBGN0032006,FBGN0260442,FBGN0000097,FBGN0001297,FBGN0000464,FBGN0261988,FBGN0263289,FBGN0000490,FBGN0000427,FBGN0085443,FBGN0015600,FBGN0001085,FBGN0040207,FBGN0000250,FBGN0011225,FBGN0025815,FBGN0029881,FBGN0259734,FBGN0039232,FBGN0262582,FBGN0014141,FBGN0041092,FBGN0000547,FBGN0002643
GO:BP	cell-cell junction organization	GO:0045216	0.032397944667742117	1.4894825406505317	84	472	13	11798	FBGN0262614,FBGN0000163,FBGN0051004,FBGN0261873,FBGN0266756,FBGN0028369,FBGN0263289,FBGN0011225,FBGN0259734,FBGN0264975,FBGN0265778,FBGN0034590,FBGN0085387
GO:BP	regulation of chemotaxis	GO:0050920	0.03395508592320092	1.4690951662155007	32	472	8	11798	FBGN0003090,FBGN0011260,FBGN0284221,FBGN0011259,FBGN0283521,FBGN0024836,FBGN0001085,FBGN0016059
GO:BP	cell fate commitment	GO:0045165	0.03773208640478517	1.4232891797172962	335	472	30	11798	FBGN0034049,FBGN0262614,FBGN0002573,FBGN0259176,FBGN0000163,FBGN0000097,FBGN0000577,FBGN0001297,FBGN0011666,FBGN0015371,FBGN0263289,FBGN0000216,FBGN0000490,FBGN0283521,FBGN0003720,FBGN0024836,FBGN0001085,FBGN0011225,FBGN0017590,FBGN0028991,FBGN0003963,FBGN0086361,FBGN0004595,FBGN0000562,FBGN0265778,FBGN0002941,FBGN0003944,FBGN0000547,FBGN0016797,FBGN0002643
GO:BP	actomyosin structure organization	GO:0031032	0.04044593726026879	1.3931250961545714	98	472	14	11798	FBGN0004117,FBGN0266084,FBGN0260442,FBGN0000711,FBGN0035761,FBGN0261836,FBGN0032225,FBGN0028991,FBGN0265356,FBGN0034072,FBGN0014141,FBGN0085376,FBGN0086906,FBGN0263706
GO:BP	photoreceptor cell development	GO:0042461	0.041725479363825445	1.379598665221074	111	472	15	11798	FBGN0265487,FBGN0031414,FBGN0031745,FBGN0002573,FBGN0266098,FBGN0000163,FBGN0000464,FBGN0261873,FBGN0028482,FBGN0261649,FBGN0283521,FBGN0024836,FBGN0028991,FBGN0015609,FBGN0265778
GO:BP	negative regulation of axon extension involved in axon guidance	GO:0048843	0.043400658852224674	1.3625036775447776	6	472	4	11798	FBGN0011260,FBGN0284221,FBGN0011259,FBGN0016059
GO:BP	positive regulation of stress fiber assembly	GO:0051496	0.043400658852224674	1.3625036775447776	6	472	4	11798	FBGN0266084,FBGN0035761,FBGN0028991,FBGN0263706
GO:BP	anterograde trans-synaptic signaling	GO:0098916	0.04607573864151888	1.3365276938654929	322	472	29	11798	FBGN0033876,FBGN0285955,FBGN0053547,FBGN0003380,FBGN0038826,FBGN0042693,FBGN0015519,FBGN0030600,FBGN0265416,FBGN0053094,FBGN0004580,FBGN0266464,FBGN0013334,FBGN0032151,FBGN0266137,FBGN0000036,FBGN0052677,FBGN0028875,FBGN0000635,FBGN0025726,FBGN0260003,FBGN0026439,FBGN0035385,FBGN0003301,FBGN0034072,FBGN0086778,FBGN0003429,FBGN0259822,FBGN0000479
GO:BP	chemical synaptic transmission	GO:0007268	0.04607573864151888	1.3365276938654929	322	472	29	11798	FBGN0033876,FBGN0285955,FBGN0053547,FBGN0003380,FBGN0038826,FBGN0042693,FBGN0015519,FBGN0030600,FBGN0265416,FBGN0053094,FBGN0004580,FBGN0266464,FBGN0013334,FBGN0032151,FBGN0266137,FBGN0000036,FBGN0052677,FBGN0028875,FBGN0000635,FBGN0025726,FBGN0260003,FBGN0026439,FBGN0035385,FBGN0003301,FBGN0034072,FBGN0086778,FBGN0003429,FBGN0259822,FBGN0000479
GO:BP	contractile actin filament bundle assembly	GO:0030038	0.046280274529372556	1.334604073526727	11	472	5	11798	FBGN0266084,FBGN0035761,FBGN0028991,FBGN0000547,FBGN0263706
GO:BP	photoreceptor cell fate commitment	GO:0046552	0.04749015706283432	1.323396394085923	87	472	13	11798	FBGN0034049,FBGN0000097,FBGN0001297,FBGN0011666,FBGN0263289,FBGN0000490,FBGN0283521,FBGN0024836,FBGN0001085,FBGN0017590,FBGN0086361,FBGN0004595,FBGN0265778
GO:BP	respiratory system development	GO:0060541	0.047873282003099635	1.3199067979833479	258	472	25	11798	FBGN0038755,FBGN0262614,FBGN0285955,FBGN0286785,FBGN0286071,FBGN0000163,FBGN0266084,FBGN0260442,FBGN0000097,FBGN0000577,FBGN0025879,FBGN0266464,FBGN0004370,FBGN0266411,FBGN0266756,FBGN0000490,FBGN0024836,FBGN0001085,FBGN0000635,FBGN0028991,FBGN0263930,FBGN0010113,FBGN0264975,FBGN0003944,FBGN0000547
GO:BP	negative regulation of cell projection organization	GO:0031345	0.04909712142974123	1.3089439698694263	25	472	7	11798	FBGN0000163,FBGN0011260,FBGN0284221,FBGN0011259,FBGN0015609,FBGN0016059,FBGN0004595
GO:CC	axon	GO:0030424	0.000019906885697485604	4.700996677199526	282	475	32	11919	FBGN0033159,FBGN0003090,FBGN0262614,FBGN0265002,FBGN0030600,FBGN0053094,FBGN0000464,FBGN0004580,FBGN0262699,FBGN0041250,FBGN0004370,FBGN0263219,FBGN0028482,FBGN0004381,FBGN0000250,FBGN0000635,FBGN0011225,FBGN0017590,FBGN0032840,FBGN0051721,FBGN0025726,FBGN0015609,FBGN0001257,FBGN0026439,FBGN0041240,FBGN0010113,FBGN0264975,FBGN0013995,FBGN0265296,FBGN0265597,FBGN0034590,FBGN0004369
GO:CC	postsynapse	GO:0098794	0.00002426589898219178	4.615003614681558	92	475	17	11919	FBGN0038826,FBGN0015519,FBGN0265416,FBGN0053094,FBGN0032151,FBGN0000036,FBGN0263289,FBGN0052677,FBGN0028875,FBGN0000635,FBGN0025726,FBGN0010905,FBGN0034072,FBGN0086778,FBGN0013995,FBGN0003429,FBGN0034590
GO:CC	plasma membrane region	GO:0098590	0.00002878289051074567	4.540865594352455	377	475	38	11919	FBGN0085414,FBGN0034286,FBGN0261871,FBGN0015721,FBGN0262614,FBGN0285955,FBGN0053547,FBGN0286785,FBGN0000163,FBGN0037685,FBGN0038412,FBGN0051004,FBGN0015519,FBGN0053094,FBGN0000464,FBGN0020258,FBGN0261873,FBGN0032151,FBGN0266756,FBGN0028369,FBGN0037993,FBGN0000036,FBGN0263289,FBGN0028875,FBGN0024836,FBGN0000635,FBGN0025726,FBGN0263930,FBGN0264078,FBGN0263258,FBGN0034072,FBGN0086778,FBGN0265778,FBG…
GO:CC	receptor complex	GO:0043235	0.0003368699511523371	3.4725377264209083	76	475	14	11919	FBGN0260446,FBGN0014073,FBGN0286785,FBGN0032006,FBGN0015519,FBGN0265416,FBGN0032151,FBGN0000036,FBGN0263289,FBGN0028875,FBGN0032752,FBGN0086778,FBGN0033791,FBGN0053531
GO:CC	anchoring junction	GO:0070161	0.0008872648743135213	3.0519467113062224	170	475	21	11919	FBGN0262614,FBGN0000633,FBGN0286785,FBGN0000163,FBGN0260442,FBGN0051004,FBGN0000464,FBGN0261873,FBGN0028369,FBGN0266801,FBGN0263289,FBGN0032225,FBGN0024836,FBGN0015609,FBGN0086347,FBGN0264975,FBGN0263258,FBGN0265778,FBGN0034590,FBGN0085387,FBGN0000547
GO:CC	postsynaptic membrane	GO:0045211	0.004717646846017284	2.3262745726845075	60	475	11	11919	FBGN0015519,FBGN0053094,FBGN0032151,FBGN0000036,FBGN0263289,FBGN0028875,FBGN0000635,FBGN0025726,FBGN0034072,FBGN0086778,FBGN0003429
GO:CC	acetylcholine-gated channel complex	GO:0005892	0.004731805911046396	2.3249730775458533	10	475	5	11919	FBGN0015519,FBGN0032151,FBGN0000036,FBGN0028875,FBGN0086778
GO:CC	cell-cell junction	GO:0005911	0.005714332045218133	2.2430345274786183	135	475	17	11919	FBGN0262614,FBGN0000633,FBGN0000163,FBGN0051004,FBGN0261873,FBGN0028369,FBGN0266801,FBGN0263289,FBGN0032225,FBGN0024836,FBGN0015609,FBGN0086347,FBGN0264975,FBGN0265778,FBGN0034590,FBGN0085387,FBGN0000547
GO:CC	ion channel complex	GO:0034702	0.007166715325399846	2.144679846132302	98	475	14	11919	FBGN0031835,FBGN0042185,FBGN0285944,FBGN0003380,FBGN0015519,FBGN0265416,FBGN0032151,FBGN0000036,FBGN0263289,FBGN0261999,FBGN0028875,FBGN0086778,FBGN0263257,FBGN0259822
GO:CC	transmembrane transporter complex	GO:1902495	0.008213890213450243	2.0854511062073953	112	475	15	11919	FBGN0031835,FBGN0042185,FBGN0285944,FBGN0003380,FBGN0015519,FBGN0265416,FBGN0032151,FBGN0000036,FBGN0263289,FBGN0261999,FBGN0028875,FBGN0039594,FBGN0086778,FBGN0263257,FBGN0259822
GO:CC	plasma membrane protein complex	GO:0098797	0.008563201202786584	2.067363851583335	182	475	20	11919	FBGN0031835,FBGN0260446,FBGN0285944,FBGN0286785,FBGN0003380,FBGN0000163,FBGN0015519,FBGN0265416,FBGN0261873,FBGN0032151,FBGN0000036,FBGN0263289,FBGN0261999,FBGN0028875,FBGN0260003,FBGN0264078,FBGN0039594,FBGN0034072,FBGN0086778,FBGN0259822
GO:CC	sarcolemma	GO:0042383	0.013914445380552474	1.8565340996401047	12	475	5	11919	FBGN0266491,FBGN0261999,FBGN0260003,FBGN0034072,FBGN0013995
GO:CC	transporter complex	GO:1990351	0.024561735819957645	1.6097409441110666	123	475	15	11919	FBGN0031835,FBGN0042185,FBGN0285944,FBGN0003380,FBGN0015519,FBGN0265416,FBGN0032151,FBGN0000036,FBGN0263289,FBGN0261999,FBGN0028875,FBGN0039594,FBGN0086778,FBGN0263257,FBGN0259822
GO:CC	synaptic membrane	GO:0097060	0.029324969337008528	1.5327624333224061	85	475	12	11919	FBGN0053547,FBGN0015519,FBGN0053094,FBGN0032151,FBGN0000036,FBGN0263289,FBGN0028875,FBGN0000635,FBGN0025726,FBGN0034072,FBGN0086778,FBGN0003429
GO:CC	plasma membrane signaling receptor complex	GO:0098802	0.03619184280517845	1.4413893030552534	51	475	9	11919	FBGN0260446,FBGN0286785,FBGN0015519,FBGN0265416,FBGN0032151,FBGN0000036,FBGN0263289,FBGN0028875,FBGN0086778
TF	Factor: HLHMD

## Sheet: Supplementary File 3e
Enrichment analyses (hypergeometric distribution calculations) for genes identified in a global RNAi screen for heart function (PMID: 20371351).
Lot size	7061	success of lot = 835
sample size	282	successes of sample= 20
		expected overlap= 33,3 (FC= 0,6)
		p val = 0,005

## Sheet: Supplementary File 3f
Human genes found associated to coronary artery diseases (CAD) in GWAS studies.
Human Gene ID , SNP ID (when available) and original article describing the association are indicated.
SNP	Human GeneID	trait	reference				Bibliography
	HLA-C	CAD	Davies_et_al_2012				Davies_et_al_2012 (PMID: 22319020)
	HLA-B	CAD	Davies_et_al_2012				Deloukas et al. 2012 (PMID: 23202125)
	PDGFD	CAD	Deloukas et al. 2012				Erdmann__et_al_2009 (PMID: 19198612)
	IL6R	CAD	Deloukas_et_al_2012				Howson_et_al_2017 (PMID: 28530674)
	APOB	CAD	Deloukas_et_al_2012				Lu_et_al_2012 (PMID: 22751097)
	ABCG8	CAD	Deloukas_et_al_2012				Peden_et_al_2011 (PMID: 21378988)
	VAMP8	CAD	Deloukas_et_al_2012				Schunkert_et_al_2011 (PMID: 21378990)
	VAMP5	CAD	Deloukas_et_al_2012				Takeuchi_et_al_2012 (PMID: 21971053)
	ZEB2	CAD	Deloukas_et_al_2012				Van_Der_Harst_and_Verweij_2018 (PMID: 29212778)
	EDNRA	CAD	Deloukas_et_al_2012				Verweij et al.2017 (PMID: 28584231)
	GUCY1A3	CAD	Deloukas_et_al_2012				Wang_et_al_2011 (PMID: 21378986)
	SLC22A4	CAD	Deloukas_et_al_2012
	KCNK5	CAD	Deloukas_et_al_2012
	PLG	CAD	Deloukas_et_al_2012
	HDAC9	CAD	Deloukas_et_al_2012
	LPL	CAD	Deloukas_et_al_2012
	TRIB1	CAD	Deloukas_et_al_2012
	KIAA1462	CAD	Deloukas_et_al_2012
	LIPA	CAD	Deloukas_et_al_2012
	SH2B3	CAD	Deloukas_et_al_2012
	FLT1	CAD	Deloukas_et_al_2012
	FURIN	CAD	Deloukas_et_al_2012
	LDLR	CAD	Deloukas_et_al_2012
	APOE	CAD	Deloukas_et_al_2012
	MRAS	CAD	Erdmann__et_al_2009
rs1892094	ATP1B1	CAD	Howson_et_al_2017
rs6700559	DX59	CAD	Howson_et_al_2017
rs6700559	CAMSAP2	CAD	Howson_et_al_2017
rs2820315	LMOD1	CAD	Howson_et_al_2017
rs2571445	TNS1	CAD	Howson_et_al_2017
rs246600	ARHGAP26	CAD	Howson_et_al_2017
rs10237377	PARP12	CAD	Howson_et_al_2017
rs12801636	PCNX3	CAD	Howson_et_al_2017
rs590121	SERPINH1	CAD	Howson_et_al_2017
rs2258287	C12orf43	CAD	Howson_et_al_2017
rs2258287	HNF1A	CAD	Howson_et_al_2017
rs11057830	SCARB1	CAD	Howson_et_al_2017
rs6494488	OAZ2	CAD	Howson_et_al_2017
rs6494488	RBPMS2	CAD	Howson_et_al_2017
rs1050362	DHX38	CAD	Howson_et_al_2017
rs17608766	GOSR2	CAD	Howson_et_al_2017
rs1867624	PECAM1	CAD	Howson_et_al_2017
rs867186	PROCR	CAD	Howson_et_al_2017
	WDR35	CAD	Lu_et_al_2012
	C6orf10	CAD	Lu_et_al_2012
	ATP2B1	CAD	Lu_et_al_2012
	BCAP29	CAD	Peden_et_al_2011
	PPAP2B	CAD	Schunkert_et_al_2011
	PCSK9	CAD	Schunkert_et_al_2011
	SORT1	CAD	Schunkert_et_al_2011
	MIA3	CAD	Schunkert_et_al_2011
	WDR12	CAD	Schunkert_et_al_2011
	ANKS1A	CAD	Schunkert_et_al_2011
	PHACTR1	CAD	Schunkert_et_al_2011
	TCF21	CAD	Schunkert_et_al_2011
	LPA	CAD	Schunkert_et_al_2011
	ZC3HC1	CAD	Schunkert_et_al_2011
	CDKN2BAS	CAD	Schunkert_et_al_2011
	ABO	CAD	Schunkert_et_al_2011
	CXCL12	CAD	Schunkert_et_al_2011
	CYP17A1	CAD	Schunkert_et_al_2011
	ZNF259	CAD	Schunkert_et_al_2011
	COL4A1	CAD	Schunkert_et_al_2011
	HHIPL1	CAD	Schunkert_et_al_2011
	ADAMTS7	CAD	Schunkert_et_al_2011
	RASD1	CAD	Schunkert_et_al_2011
	SMG6	CAD	Schunkert_et_al_2011
	UBE2Z	CAD	Schunkert_et_al_2011
	MRPS6	CAD	Schunkert_et_al_2011
	APOA5	CAD	Schunkert_et_al_2011
	APOA1	CAD	Schunkert_et_al_2011
	APOC3	CAD	Schunkert_et_al_2011
	SMCR3	CAD	Schunkert_et_al_2011
	PEMT	CAD	Schunkert_et_al_2011
	HLA	CAD	Takeuchi_et_al_2012
	BRAP	CAD	Takeuchi_et_al_2012
	DRB-DQB	CAD	Takeuchi_et_al_2012
rs11806316	NGF	CAD	Van_Der_Harst_and_Verweij_2018
rs11806316	CASQ2	CAD	Van_Der_Harst_and_Verweij_2018
rs60154123	DIEXF	CAD	Van_Der_Harst_and_Verweij_2018
rs60154123	SERTAD4	CAD	Van_Der_Harst_and_Verweij_2018
rs60154123	HHAT	CAD	Van_Der_Harst_and_Verweij_2018
rs36096196	SKI	CAD	Van_Der_Harst_and_Verweij_2018
rs699	AGT	CAD	Van_Der_Harst_and_Verweij_2018
rs699	CAPN9	CAD	Van_Der_Harst_and_Verweij_2018
rs699	GNPAT	CAD	Van_Der_Harst_and_Verweij_2018
rs36096196	MORN1	CAD	Van_Der_Harst_and_Verweij_2018
rs2493298	RER1	CAD	Van_Der_Harst_and_Verweij_2018
rs2493298	PEX10	CAD	Van_Der_Harst_and_Verweij_2018
rs2493298	PLCH2	CAD	Van_Der_Harst_and_Verweij_2018
rs2493298	PRDM16	CAD	Van_Der_Harst_and_Verweij_2018
rs61776719	MANEAL	CAD	Van_Der_Harst_and_Verweij_2018
rs61776719	INPP5B	CAD	Van_Der_Harst_and_Verweij_2018
rs61776719	SF3A3	CAD	Van_Der_Harst_and_Verweij_2018
rs61776719	FHL3	CAD	Van_Der_Harst_and_Verweij_2018
rs61776719	UTP11	CAD	Van_Der_Harst_and_Verweij_2018
rs12999907	FIGN	CAD	Van_Der_Harst_and_Verweij_2018
rs840616	CALCRL	CAD	Van_Der_Harst_and_Verweij_2018
rs840616	TFPI	CAD	Van_Der_Harst_and_Verweij_2018
rs11677932	COL6A3	CAD	Van_Der_Harst_and_Verweij_2018
rs582384	PRKCE	CAD	Van_Der_Harst_and_Verweij_2018
rs582384	TMEM247	CAD	Van_Der_Harst_and_Verweij_2018
rs10512861	DNAJC13	CAD	Van_Der_Harst_and_Verweij_2018
rs10512861	ACAD11	CAD	Van_Der_Harst_and_Verweij_2018
rs10512861	UBA5	CAD	Van_Der_Harst_and_Verweij_2018
rs10512861	NPHP3	CAD	Van_Der_Harst_and_Verweij_2018
rs667920	PPP2R3A	CAD	Van_Der_Harst_and_Verweij_2018
rs667920	MSL2	CAD	Van_Der_Harst_and_Verweij_2018
rs667920	STAG1	CAD	Van_Der_Harst_and_Verweij_2018
rs667920	NCK1	CAD	Van_Der_Harst_and_Verweij_2018
rs4266144	TIPARP	CAD	Van_Der_Harst_and_Verweij_2018
rs4266144	CCNL1	CAD	Van_Der_Harst_and_Verweij_2018
rs12897	FNDC3B	CAD	Van_Der_Harst_and_Verweij_2018
rs7633770	RTP3	CAD	Van_Der_Harst_and_Verweij_2018
rs7633770	ALS2CL	CAD	Van_Der_Harst_and_Verweij_2018
rs7617773	MAP4	CAD	Van_Der_Harst_and_Verweij_2018
rs7617773	CDC25A	CAD	Van_Der_Harst_and_Verweij_2018
rs7617773	ZNF589	CAD	Van_Der_Harst_and_Verweij_2018
rs7617773	SPINK8	CAD	Van_Der_Harst_and_Verweij_2018
rs7696431	DDX60L	CAD	Van_Der_Harst_and_Verweij_2018
rs7696431	PALLD	CAD	Van_Der_Harst_and_Verweij_2018
rs16844401	MSANTD1	CAD	Van_Der_Harst_and_Verweij_2018
rs16844401	RGS12	CAD	Van_Der_Harst_and_Verweij_2018
rs16844401	HGFAC	CAD	Van_Der_Harst_and_Verweij_2018
rs12500824	FAM47E	CAD	Van_Der_Harst_and_Verweij_2018
rs12500824	STBD1	CAD	Van_Der_Harst_and_Verweij_2018
rs12500824	SHROOM3	CAD	Van_Der_Harst_and_Verweij_2018
rs12500824	SEPT11	CAD	Van_Der_Harst_and_Verweij_2018
rs11099493	RASGEF1B	CAD	Van_Der_Harst_and_Verweij_2018
rs11099493	HNRNPD	CAD	Van_Der_Harst_and_Verweij_2018
rs3775058	UNC5C	CAD	Van_Der_Harst_and_Verweij_2018
rs3936511	MAP3K1	CAD	Van_Der_Harst_and_Verweij_2018
rs3936511	MIER3	CAD	Van_Der_Harst_and_Verweij_2018
rs1508798	SEMA5A	CAD	Van_Der_Harst_and_Verweij_2018
rs1508798	TAS2R1	CAD	Van_Der_Harst_and_Verweij_2018
rs1591805	CENPW	CAD	Van_Der_Harst_and_Verweij_2018
rs17080091	IYD	CAD	Van_Der_Harst_and_Verweij_2018
rs17080091	PLEKHG1	CAD	Van_Der_Harst_and_Verweij_2018
rs9501744	FOXC1	CAD	Van_Der_Harst_and_Verweij_2018
rs1321309	CDKN1A	CAD	Van_Der_Harst_and_Verweij_2018
rs1321309	PI16	CAD	Van_Der_Harst_and_Verweij_2018
rs6905288	VEGFA	CAD	Van_Der_Harst_and_Verweij_2018
rs6905288	MRPL14	CAD	Van_Der_Harst_and_Verweij_2018
rs6905288	TMEM63B	CAD	Van_Der_Harst_and_Verweij_2018
rs9367716	DST	CAD	Van_Der_Harst_and_Verweij_2018
rs9367716	BEND6	CAD	Van_Der_Harst_and_Verweij_2018
rs9367716	RAB23	CAD	Van_Der_Harst_and_Verweij_2018
rs9367716	PRIM2	CAD	Van_Der_Harst_and_Verweij_2018
rs4613862	FAM46A	CAD	Van_Der_Harst_and_Verweij_2018
rs11509880	THSD7A	CAD	Van_Der_Harst_and_Verweij_2018
rs975722	ASZ1	CAD	Van_Der_Harst_and_Verweij_2018
rs975722	CFTR	CAD	Van_Der_Harst_and_Verweij_2018
rs975722	CTTNBP2	CAD	Van_Der_Harst_and_Verweij_2018
rs11509880	TMEM106B	CAD	Van_Der_Harst_and_Verweij_2018
rs10267593	MAD1L1	CAD	Van_Der_Harst_and_Verweij_2018
rs2107732	MYO1G	CAD	Van_Der_Harst_and_Verweij_2018
rs2107732	CCM2	CAD	Van_Der_Harst_and_Verweij_2018
rs7797644	FAM220A	CAD	Van_Der_Harst_and_Verweij_2018
rs7797644	RAC1	CAD	Van_Der_Harst_and_Verweij_2018
rs7797644	DAGLB	CAD	Van_Der_Harst_and_Verweij_2018
rs7797644	KDELR2	CAD	Van_Der_Harst_and_Verweij_2018
rs10093110	ZFPM2	CAD	Van_Der_Harst_and_Verweij_2018
rs6997340	NAT2	CAD	Van_Der_Harst_and_Verweij_2018
rs6984210	DOK2	CAD	Van_Der_Harst_and_Verweij_2018
rs6984210	XPO7	CAD	Van_Der_Harst_and_Verweij_2018
rs6984210	DMTN	CAD	Van_Der_Harst_and_Verweij_2018
rs6984210	SFTPC	CAD	Van_Der_Harst_and_Verweij_2018
rs6984210	BMP1	CAD	Van_Der_Harst_and_Verweij_2018
rs6984210	PHYHIP	CAD	Van_Der_Harst_and_Verweij_2018
rs944172	KLF4	CAD	Van_Der_Harst_and_Verweij_2018
rs885150	DAB2IP	CAD	Van_Der_Harst_and_Verweij_2018
rs4918072	SH3PXD2A	CAD	Van_Der_Harst_and_Verweij_2018
rs4918072	STN1	CAD	Van_Der_Harst_and_Verweij_2018
rs61848342	NUDT5	CAD	Van_Der_Harst_and_Verweij_2018
rs61848342	CDC123	CAD	Van_Der_Harst_and_Verweij_2018
rs4752700	PLEKHA1	CAD	Van_Der_Harst_and_Verweij_2018
rs4752700	HTRA1	CAD	Van_Der_Harst_and_Verweij_2018
rs61848342	OPTN	CAD	Van_Der_Harst_and_Verweij_2018
rs17680741	MAT1A	CAD	Van_Der_Harst_and_Verweij_2018
rs17680741	FAM213A	CAD	Van_Der_Harst_and_Verweij_2018
rs17680741	TSPAN14	CAD	Van_Der_Harst_and_Verweij_2018
rs7947761	ARHGAP42	CAD	Van_Der_Harst_and_Verweij_2018
rs7116641	HSD17B12	CAD	Van_Der_Harst_and_Verweij_2018
rs11601507	OR52B6	CAD	Van_Der_Harst_and_Verweij_2018
rs11601507	TRIM5	CAD	Van_Der_Harst_and_Verweij_2018
rs11601507	TRIM6	CAD	Van_Der_Harst_and_Verweij_2018
rs11601507	TRIM22	CAD	Van_Der_Harst_and_Verweij_2018
rs11601507	OR52N1	CAD	Van_Der_Harst_and_Verweij_2018
rs11838267	C1S	CAD	Van_Der_Harst_and_Verweij_2018
rs7306455	NDUFA12	CAD	Van_Der_Harst_and_Verweij_2018
rs7306455	FGD6	CAD	Van_Der_Harst_and_Verweij_2018
rs1317507	MCF2L	CAD	Van_Der_Harst_and_Verweij_2018
rs1317507	PCID2	CAD	Van_Der_Harst_and_Verweij_2018
rs1317507	CUL4A	CAD	Van_Der_Harst_and_Verweij_2018
rs9591012	N4BP2L2	CAD	Van_Der_Harst_and_Verweij_2018
rs9591012	PDS5B	CAD	Van_Der_Harst_and_Verweij_2018
rs2145598	PSMA3	CAD	Van_Der_Harst_and_Verweij_2018
rs2145598	ARID4A	CAD	Van_Der_Harst_and_Verweij_2018
rs112635299	SERPINA2	CAD	Van_Der_Harst_and_Verweij_2018
rs112635299	SERPINA1	CAD	Van_Der_Harst_and_Verweij_2018
rs7199941	CENPN	CAD	Van_Der_Harst_and_Verweij_2018
rs7199941	PLCG2	CAD	Van_Der_Harst_and_Verweij_2018
rs13723	GIT1	CAD	Van_Der_Harst_and_Verweij_2018
rs13723	ANKRD13B	CAD	Van_Der_Harst_and_Verweij_2018
rs13723	CORO6	CAD	Van_Der_Harst_and_Verweij_2018
rs13723	SSH2	CAD	Van_Der_Harst_and_Verweij_2018
rs13723	EFCAB5	CAD	Van_Der_Harst_and_Verweij_2018
rs76954792	RAB11FIP4	CAD	Van_Der_Harst_and_Verweij_2018
rs76954792	COPRS	CAD	Van_Der_Harst_and_Verweij_2018
rs2074158	DNAJC7	CAD	Van_Der_Harst_and_Verweij_2018
rs2074158	NKIRAS2	CAD	Van_Der_Harst_and_Verweij_2018
rs2074158	DHX58	CAD	Van_Der_Harst_and_Verweij_2018
rs2074158	KAT2A	CAD	Van_Der_Harst_and_Verweij_2018
rs2074158	RAB5C	CAD	Van_Der_Harst_and_Verweij_2018
rs2074158	KCNH4	CAD	Van_Der_Harst_and_Verweij_2018
rs2074158	HCRT	CAD	Van_Der_Harst_and_Verweij_2018
rs2074158	GHDC	CAD	Van_Der_Harst_and_Verweij_2018
rs9964304	RPL17	CAD	Van_Der_Harst_and_Verweij_2018
rs9964304	ACAA2	CAD	Van_Der_Harst_and_Verweij_2018
rs73015714	COLGALT1	CAD	Van_Der_Harst_and_Verweij_2018
rs73015714	MAP1S	CAD	Van_Der_Harst_and_Verweij_2018
rs73015714	FCHO1	CAD	Van_Der_Harst_and_Verweij_2018
rs6102343	TOP1	CAD	Van_Der_Harst_and_Verweij_2018
rs6102343	PLCG1	CAD	Van_Der_Harst_and_Verweij_2018
rs6102343	ZHX3	CAD	Van_Der_Harst_and_Verweij_2018
rs3827066	PLTP	CAD	Van_Der_Harst_and_Verweij_2018
rs3827066	PCIF1	CAD	Van_Der_Harst_and_Verweij_2018
rs3827066	ZNF335	CAD	Van_Der_Harst_and_Verweij_2018
rs260020	ZNF831	CAD	Van_Der_Harst_and_Verweij_2018
rs2832227	MAP3K7CL	CAD	Van_Der_Harst_and_Verweij_2018
rs2832227	BACH1	CAD	Van_Der_Harst_and_Verweij_2018
rs3827066	NEURL2	CAD	Van_Der_Harst_and_Verweij_2019
rs11810571	TDRKH	CAD	Verweij et al.2017
rs7623687	RHOA	CAD	Verweij et al.2017
rs142695226	UMPS	CAD	Verweij et al.2017
rs433903	SGEF	CAD	Verweij et al.2017
rs10857147	PRDM8	CAD	Verweij et al.2017
rs11723436	MAD2L1	CAD	Verweij et al.2017
rs35879803	ZNF827	CAD	Verweij et al.2017
rs35541991	HDGFL1	CAD	Verweij et al.2017
rs1351525	ARNTL	CAD	Verweij et al.2017
rs11170820	HOXC4	CAD	Verweij et al.2017
rs2244608	HNF1A	CAD	Verweij et al.2017
rs3832966	TMED10	CAD	Verweij et al.2017
rs33928862	BCAR1	CAD	Verweij et al.2017
rs7500448	CDH13	CAD	Verweij et al.2017
rs138120077	HNRNPUL1	CAD	Verweij et al.2017
rs8108632	TGFB1	CAD	Verweij et al.2017
rs7623687	AMT	CAD	Verweij et al.2017
rs7623687	TCTA	CAD	Verweij et al.2017
rs7623687	CDHR4	CAD	Verweij et al.2017
rs7623687	KLHDC8B	CAD	Verweij et al.2017
rs142695226	ITGB5	CAD	Verweij et al.2017
rs433903	DHX36	CAD	Verweij et al.2017
rs10857147	FGF5	CAD	Verweij et al.2017
rs11723436	PDE5A	CAD	Verweij et al.2017
rs3832966	ZC2HC1C	CAD	Verweij et al.2017
rs3832966	RPS6KL1	CAD	Verweij et al.2017
rs3832966	NEK9	CAD	Verweij et al.2017
rs3832966	EIF2B2	CAD	Verweij et al.2017
rs3832966	ACYP1	CAD	Verweij et al.2017
rs2244608	OASL	CAD	Verweij et al.2017
rs138120077	TGFB1	CAD	Verweij et al.2017
rs8108632	B9D2	CAD	Verweij et al.2017
rs138120077	CCDC97	CAD	Verweij et al.2017
	C6orf105	CAD	Wang_et_al_2011

## Sheet: Supplementary File 3g
Drosophila orthologues of human CAD genes (Supplementary File 3f) identified using DIOPT (https://www.flyrnai.org/diopt).
SNP	Human GeneID	trait	reference	Human Gene ID	HGNCID	Human Symbol	Species	Fly GeneID	FBgn_dm3	Fly Symbol	DIOPT Score	Weighted Score	Rank	Best Score	Best Score Reverse	Prediction Derived From
rs60154123	DIEXF	CAD	Van_Der_Harst_and_Verweij_2018	27042	28440	UTP25	Fly	37803	FBgn0034933	CG3735	14	13.8	high	Yes	Yes	Compara, eggNOG, Hieranoid, Homologene, Inparanoid, OMA, OrthoDB, OrthoFinder, OrthoInspector, orthoMCL, Panther, Phylome, RoundUp, TreeFam
rs60154123	SERTAD4	CAD	Van_Der_Harst_and_Verweij_2018	56256	25236	SERTAD4	Fly	31217	FBgn0023526	CG2865	2	1.83	high	Yes	Yes	Compara, eggNOG
rs60154123	HHAT	CAD	Van_Der_Harst_and_Verweij_2018	55733	18270	HHAT	Fly	44098	FBgn0024194	rasp	15	14.75	high	Yes	Yes	Compara, eggNOG, Hieranoid, Homologene, Inparanoid, Isobase, OMA, OrthoDB, OrthoFinder, OrthoInspector, orthoMCL, Panther, Phylome, RoundUp, TreeFam
rs36096196	SKI	CAD	Van_Der_Harst_and_Verweij_2018	6497	10896	SKI	Fly	5740414	FBgn0085450	Snoo	7	6.84	high	Yes	Yes	eggNOG, OrthoFinder, OrthoInspector, orthoMCL, Panther, Phylome, RoundUp
rs699	CAPN9	CAD	Van_Der_Harst_and_Verweij_2018	10753	1486	CAPN9	Fly	37232	FBgn0012051	CalpA	13	12.84	high	Yes	Yes	Compara, eggNOG, Hieranoid, Homologene, Inparanoid, OMA, OrthoDB, OrthoFinder, OrthoInspector, orthoMCL, Panther, Phylome, RoundUp
rs699	GNPAT	CAD	Van_Der_Harst_and_Verweij_2018	8443	4416	GNPAT	Fly	53586	FBgn0040212	Dhap-at	14	13.74	high	Yes	Yes	Compara, eggNOG, Hieranoid, Homologene, Inparanoid, Isobase, OrthoDB, OrthoFinder, OrthoInspector, orthoMCL, Panther, Phylome, RoundUp, TreeFam
rs2493298	RER1	CAD	Van_Der_Harst_and_Verweij_2018	11079	30309	RER1	Fly	43042	FBgn0039303	CG11857	14	13.8	high	Yes	Yes	Compara, eggNOG, Hieranoid, Homologene, Inparanoid, OMA, OrthoDB, OrthoFinder, OrthoInspector, orthoMCL, Panther, Phylome, RoundUp, TreeFam
rs2493298	PEX10	CAD	Van_Der_Harst_and_Verweij_2018	5192	8851	PEX10	Fly	38182	FBgn0035233	Pex10	14	13.8	high	Yes	Yes	Compara, eggNOG, Hieranoid, Homologene, Inparanoid, OMA, OrthoDB, OrthoFinder, OrthoInspector, orthoMCL, Panther, Phylome, RoundUp, TreeFam
rs61776719	INPP5B	CAD	Van_Der_Harst_and_Verweij_2018	3633	6077	INPP5B	Fly	31157	FBgn0023508	Ocrl	13	12.8	high	Yes	Yes	Compara, eggNOG, Hieranoid, Inparanoid, OMA, OrthoDB, OrthoFinder, OrthoInspector, orthoMCL, Panther, Phylome, RoundUp, TreeFam
rs61776719	SF3A3	CAD	Van_Der_Harst_and_Verweij_2018	10946	10767	SF3A3	Fly	40678	FBgn0014366	noi	15	14.75	high	Yes	Yes	Compara, eggNOG, Hieranoid, Homologene, Inparanoid, Isobase, OMA, OrthoDB, OrthoFinder, OrthoInspector, orthoMCL, Panther, Phylome, RoundUp, TreeFam
rs61776719	UTP11	CAD	Van_Der_Harst_and_Verweij_2018	51118	24329	UTP11	Fly	31812	FBgn0030063	CG1789	13	12.79	high	Yes	Yes	Compara, eggNOG, Hieranoid, Homologene, Inparanoid, OrthoDB, OrthoFinder, OrthoInspector, orthoMCL, Panther, Phylome, RoundUp, TreeFam
rs840616	CALCRL	CAD	Van_Der_Harst_and_Verweij_2018	10203	16709	CALCRL	Fly	36475	FBgn0052843	Dh31-R	14	13.82	high	Yes	Yes	eggNOG, Hieranoid, Homologene, Inparanoid, Isobase, OMA, OrthoDB, OrthoFinder, OrthoInspector, orthoMCL, Panther, Phylome, RoundUp, TreeFam
rs840616	TFPI	CAD	Van_Der_Harst_and_Verweij_2018	7035	11760	TFPI	Fly	42763	FBgn0262009	CG42827	4	3.9	high	Yes	Yes	eggNOG, Inparanoid, Isobase, OrthoFinder
rs582384	PRKCE	CAD	Van_Der_Harst_and_Verweij_2018	5581	9401	PRKCE	Fly	43428	FBgn0003093	Pkc98E	14	13.82	high	Yes	Yes	eggNOG, Hieranoid, Homologene, Inparanoid, Isobase, OMA, OrthoDB, OrthoFinder, OrthoInspector, orthoMCL, Panther, Phylome, RoundUp, TreeFam
rs10512861	DNAJC13	CAD	Van_Der_Harst_and_Verweij_2018	23317	30343	DNAJC13	Fly	35939	FBgn0015477	Rme-8	14	13.8	high	Yes	Yes	Compara, eggNOG, Hieranoid, Homologene, Inparanoid, OMA, OrthoDB, OrthoFinder, OrthoInspector, orthoMCL, Panther, Phylome, RoundUp, TreeFam
rs10512861	UBA5	CAD	Van_Der_Harst_and_Verweij_2018	79876	23230	UBA5	Fly	32094	FBgn0030305	Uba5	15	14.75	high	Yes	Yes	Compara, eggNOG, Hieranoid, Homologene, Inparanoid, Isobase, OMA, OrthoDB, OrthoFinder, OrthoInspector, orthoMCL, Panther, Phylome, RoundUp, TreeFam
rs667920	MSL2	CAD	Van_Der_Harst_and_Verweij_2018	55167	25544	MSL2	Fly	33565	FBgn0005616	msl-2	11	10.78	high	Yes	Yes	Compara, eggNOG, Hieranoid, Isobase, OMA, OrthoFinder, OrthoInspector, orthoMCL, Panther, RoundUp, TreeFam
rs667920	STAG1	CAD	Van_Der_Harst_and_Verweij_2018	10274	11354	STAG1	Fly	33974	FBgn0020616	SA	14	13.8	high	Yes	Yes	Compara, eggNOG, Hieranoid, Homologene, Inparanoid, OMA, OrthoDB, OrthoFinder, OrthoInspector, orthoMCL, Panther, Phylome, RoundUp, TreeFam
rs667920	NCK1	CAD	Van_Der_Harst_and_Verweij_2018	4690	7664	NCK1	Fly	33262	FBgn0010583	dock	14	13.8	high	Yes	Yes	Compara, eggNOG, Hieranoid, Homologene, Inparanoid, OMA, OrthoDB, OrthoFinder, OrthoInspector, orthoMCL, Panther, Phylome, RoundUp, TreeFam
rs4266144	CCNL1	CAD	Van_Der_Harst_and_Verweij_2018	57018	20569	CCNL1	Fly	31178	FBgn0040394	CG16903	10	9.86	high	Yes	Yes	eggNOG, Inparanoid, OMA, OrthoFinder, OrthoInspector, orthoMCL, Panther, Phylome, RoundUp, TreeFam
rs7617773	CDC25A	CAD	Van_Der_Harst_and_Verweij_2018	993	1725	CDC25A	Fly	43466	FBgn0003525	stg	12	11.74	high	Yes	Yes	Compara, eggNOG, Inparanoid, Isobase, OrthoDB, OrthoFinder, OrthoInspector, orthoMCL, Panther, Phylome, RoundUp, TreeFam
rs7696431	PALLD	CAD	Van_Der_Harst_and_Verweij_2018	23022	17068	PALLD	Fly	2769001	FBgn0052311	zormin	2	1.91	high	Yes	Yes	OrthoFinder, Phylome
rs16844401	MSANTD1	CAD	Van_Der_Harst_and_Verweij_2018	345222	33741	MSANTD1	Fly	59150	FBgn0042111	CG18766	8	7.77	high	Yes	Yes	Compara, eggNOG, OrthoFinder, OrthoInspector, orthoMCL, Panther, Phylome, RoundUp
rs16844401	RGS12	CAD	Van_Der_Harst_and_Verweij_2018	6002	9994	RGS12	Fly	42672	FBgn0020278	loco	11	10.86	high	Yes	Yes	eggNOG, Hieranoid, Inparanoid, OMA, OrthoFinder, OrthoInspector, orthoMCL, Panther, Phylome, RoundUp, TreeFam
rs12500824	SHROOM3	CAD	Van_Der_Harst_and_Verweij_2018	57619	30422	SHROOM3	Fly	36592	FBgn0085408	Shrm	8	8.01	high	Yes	Yes	Compara, eggNOG, Hieranoid, Inparanoid, OrthoFinder, OrthoInspector, Panther, RoundUp
rs11099493	RASGEF1B	CAD	Van_Der_Harst_and_Verweij_2018	153020	24881	RASGEF1B	Fly	2768961	FBgn0037188	CG7369	14	13.84	high	Yes	Yes	Compara, eggNOG, Hieranoid, Homologene, Inparanoid, Isobase, OMA, OrthoDB, OrthoFinder, OrthoInspector, orthoMCL, Panther, RoundUp, TreeFam
rs3775058	UNC5C	CAD	Van_Der_Harst_and_Verweij_2018	8633	12569	UNC5C	Fly	36703	FBgn0034013	unc-5	15	14.75	high	Yes	Yes	Compara, eggNOG, Hieranoid, Homologene, Inparanoid, Isobase, OMA, OrthoDB, OrthoFinder, OrthoInspector, orthoMCL, Panther, Phylome, RoundUp, TreeFam
rs1508798	SEMA5A	CAD	Van_Der_Harst_and_Verweij_2018	9037	10736	SEMA5A	Fly	37066	FBgn0284221	Sema5c	13	12.82	high	Yes	Yes	eggNOG, Hieranoid, Inparanoid, Isobase, OMA, OrthoDB, OrthoFinder, OrthoInspector, orthoMCL, Panther, Phylome, RoundUp, TreeFam
rs17080091	IYD	CAD	Van_Der_Harst_and_Verweij_2018	389434	21071	IYD	Fly	39242	FBgn0036125	Iyd	11	10.74	high	Yes	Yes	Compara, eggNOG, Homologene, OMA, OrthoFinder, OrthoInspector, orthoMCL, Panther, Phylome, RoundUp, TreeFam
rs9501744	FOXC1	CAD	Van_Der_Harst_and_Verweij_2018	2296	3800	FOXC1	Fly	40374	FBgn0014143	croc	10	9.9	high	Yes	Yes	eggNOG, Inparanoid, Isobase, OrthoDB, OrthoFinder, OrthoInspector, orthoMCL, Panther, RoundUp, TreeFam
rs1321309	CDKN1A	CAD	Van_Der_Harst_and_Verweij_2018	1026	1784	CDKN1A	Fly	36001	FBgn0010316	dap	3	2.91	high	Yes	Yes	eggNOG, OrthoDB, OrthoFinder
rs1321309	PI16	CAD	Van_Der_Harst_and_Verweij_2018	221476	21245	PI16	Fly	35303	FBgn0032853	CG10651	5	4.88	high	Yes	Yes	eggNOG, OrthoDB, Panther, Phylome, TreeFam
rs1321309	PI16	CAD	Van_Der_Harst_and_Verweij_2018	221476	21245	PI16	Fly	246645	FBgn0050486	CG30486	5	4.88	high	Yes	Yes	eggNOG, OrthoDB, Panther, Phylome, TreeFam
rs6905288	MRPL14	CAD	Van_Der_Harst_and_Verweij_2018	64928	14279	MRPL14	Fly	31222	FBgn0040389	mRpL14	14	13.8	high	Yes	Yes	Compara, eggNOG, Hieranoid, Homologene, Inparanoid, OMA, OrthoDB, OrthoFinder, OrthoInspector, orthoMCL, Panther, Phylome, RoundUp, TreeFam
rs9367716	DST	CAD	Van_Der_Harst_and_Verweij_2018	667	1090	DST	Fly	36542	FBgn0013733	shot	11	10.85	high	Yes	Yes	eggNOG, Homologene, Inparanoid, Isobase, OrthoDB, OrthoFinder, OrthoInspector, orthoMCL, Panther, Phylome, RoundUp
rs9367716	RAB23	CAD	Van_Der_Harst_and_Verweij_2018	51715	14263	RAB23	Fly	40701	FBgn0037364	Rab23	14	13.8	high	Yes	Yes	Compara, eggNOG, Hieranoid, Homologene, Inparanoid, OMA, OrthoDB, OrthoFinder, OrthoInspector, orthoMCL, Panther, Phylome, RoundUp, TreeFam
rs9367716	PRIM2	CAD	Van_Der_Harst_and_Verweij_2018	5558	9370	PRIM2	Fly	44915	FBgn0259676	DNApol-alpha60	14	13.79	high	Yes	Yes	Compara, eggNOG, Hieranoid, Homologene, Inparanoid, Isobase, OMA, OrthoDB, OrthoFinder, OrthoInspector, orthoMCL, Panther, Phylome, RoundUp
rs975722	ASZ1	CAD	Van_Der_Harst_and_Verweij_2018	136991	1350	ASZ1	Fly	35795	FBgn0033273	Gasz	6	5.73	high	Yes	Yes	eggNOG, OMA, OrthoDB, OrthoFinder, orthoMCL, Phylome
rs10267593	MAD1L1	CAD	Van_Der_Harst_and_Verweij_2018	8379	6762	MAD1L1	Fly	35954	FBgn0026326	Mad1	12	11.91	high	Yes	Yes	eggNOG, Hieranoid, Homologene, Inparanoid, OMA, OrthoDB, OrthoFinder, OrthoInspector, orthoMCL, Panther, Phylome, RoundUp
rs7797644	RAC1	CAD	Van_Der_Harst_and_Verweij_2018	5879	9801	RAC1	Fly	38146	FBgn0010333	Rac1	12	11.86	high	Yes	Yes	eggNOG, Hieranoid, Homologene, Inparanoid, OrthoDB, OrthoFinder, OrthoInspector, orthoMCL, Panther, Phylome, RoundUp, TreeFam
rs7797644	RAC1	CAD	Van_Der_Harst_and_Verweij_2018	5879	9801	RAC1	Fly	38831	FBgn0014011	Rac2	12	11.84	high	Yes	Yes	eggNOG, Hieranoid, Homologene, Inparanoid, OMA, OrthoDB, OrthoFinder, OrthoInspector, orthoMCL, Panther, Phylome, TreeFam
rs7797644	KDELR2	CAD	Van_Der_Harst_and_Verweij_2018	11014	6305	KDELR2	Fly	34427	FBgn0267330	KdelR	14	13.75	high	Yes	Yes	Compara, eggNOG, Hieranoid, Inparanoid, Isobase, OMA, OrthoDB, OrthoFinder, OrthoInspector, orthoMCL, Panther, Phylome, RoundUp, TreeFam
rs6984210	DOK2	CAD	Van_Der_Harst_and_Verweij_2018	9046	2991	DOK2	Fly	31667	FBgn0029944	Dok	9	8.73	high	Yes	Yes	Compara, eggNOG, OrthoFinder, OrthoInspector, orthoMCL, Panther, Phylome, RoundUp, TreeFam
rs6984210	XPO7	CAD	Van_Der_Harst_and_Verweij_2018	23039	14108	XPO7	Fly	118436	FBgn0053180	Ranbp16	15	14.75	high	Yes	Yes	Compara, eggNOG, Hieranoid, Homologene, Inparanoid, Isobase, OMA, OrthoDB, OrthoFinder, OrthoInspector, orthoMCL, Panther, Phylome, RoundUp, TreeFam
rs6984210	BMP1	CAD	Van_Der_Harst_and_Verweij_2018	649	1067	BMP1	Fly	42944	FBgn0004885	tok	11	10.85	high	Yes	Yes	eggNOG, Hieranoid, Inparanoid, Isobase, OrthoDB, OrthoFinder, OrthoInspector, orthoMCL, Panther, Phylome, RoundUp
rs885150	DAB2IP	CAD	Van_Der_Harst_and_Verweij_2018	153090	17294	DAB2IP	Fly	32754	FBgn0261570	CG42684	10	9.93	high	Yes	Yes	Compara, eggNOG, Hieranoid, Inparanoid, OrthoDB, OrthoFinder, OrthoInspector, Panther, Phylome, RoundUp
rs61848342	OPTN	CAD	Van_Der_Harst_and_Verweij_2018	10133	17142	OPTN	Fly	37967	FBgn0041205	key	4	4.07	high	Yes	Yes	OrthoDB, OrthoFinder, Panther, TreeFam
rs7116641	HSD17B12	CAD	Van_Der_Harst_and_Verweij_2018	51144	18646	HSD17B12	Fly	31703	FBgn0029975	spidey	14	13.82	high	Yes	Yes	eggNOG, Hieranoid, Homologene, Inparanoid, Isobase, OMA, OrthoDB, OrthoFinder, OrthoInspector, orthoMCL, Panther, Phylome, RoundUp, TreeFam
rs11838267	C1S	CAD	Van_Der_Harst_and_Verweij_2018	716	1247	C1S	Fly	31917	FBgn0019929	Ser7	2	1.8	high	Yes	Yes	eggNOG, orthoMCL
rs7306455	NDUFA12	CAD	Van_Der_Harst_and_Verweij_2018	55967	23987	NDUFA12	Fly	33443	FBgn0031436	ND-B17.2	15	14.75	high	Yes	Yes	Compara, eggNOG, Hieranoid, Homologene, Inparanoid, Isobase, OMA, OrthoDB, OrthoFinder, OrthoInspector, orthoMCL, Panther, Phylome, RoundUp, TreeFam
rs1317507	MCF2L	CAD	Van_Der_Harst_and_Verweij_2018	23263	14576	MCF2L	Fly	35496	FBgn0050440	CG30440	6	5.9	high	Yes	Yes	Compara, OrthoFinder, OrthoInspector, Panther, Phylome, TreeFam
rs1317507	PCID2	CAD	Van_Der_Harst_and_Verweij_2018	55795	25653	PCID2	Fly	39306	FBgn0036184	PCID2	14	13.8	high	Yes	Yes	Compara, eggNOG, Hieranoid, Homologene, Inparanoid, OMA, OrthoDB, OrthoFinder, OrthoInspector, orthoMCL, Panther, Phylome, RoundUp, TreeFam
rs1317507	CUL4A	CAD	Van_Der_Harst_and_Verweij_2018	8451	2554	CUL4A	Fly	35780	FBgn0033260	Cul4	14	13.75	high	Yes	Yes	Compara, eggNOG, Hieranoid, Inparanoid, Isobase, OMA, OrthoDB, OrthoFinder, OrthoInspector, orthoMCL, Panther, Phylome, RoundUp, TreeFam
rs9591012	PDS5B	CAD	Van_Der_Harst_and_Verweij_2018	23047	20418	PDS5B	Fly	36286	FBgn0260012	pds5	14	13.8	high	Yes	Yes	Compara, eggNOG, Hieranoid, Homologene, Inparanoid, OMA, OrthoDB, OrthoFinder, OrthoInspector, orthoMCL, Panther, Phylome, RoundUp, TreeFam
rs2145598	PSMA3	CAD	Van_Der_Harst_and_Verweij_2018	5684	9532	PSMA3	Fly	36018	FBgn0023175	Prosalpha7	15	14.75	high	Yes	Yes	Compara, eggNOG, Hieranoid, Homologene, Inparanoid, Isobase, OMA, OrthoDB, OrthoFinder, OrthoInspector, orthoMCL, Panther, Phylome, RoundUp, TreeFam
rs2145598	ARID4A	CAD	Van_Der_Harst_and_Verweij_2018	5926	9885	ARID4A	Fly	32877	FBgn0085451	htk	11	10.78	high	Yes	Yes	Compara, eggNOG, Hieranoid, Inparanoid, OrthoFinder, OrthoInspector, orthoMCL, Panther, Phylome, RoundUp, TreeFam
rs13723	SSH2	CAD	Van_Der_Harst_and_Verweij_2018	85464	30580	SSH2	Fly	42986	FBgn0029157	ssh	9	8.85	high	Yes	Yes	eggNOG, Inparanoid, OrthoFinder, OrthoInspector, orthoMCL, Panther, Phylome, RoundUp, TreeFam
rs76954792	RAB11FIP4	CAD	Van_Der_Harst_and_Verweij_2018	84440	30267	RAB11FIP4	Fly	39572	FBgn0013718	nuf	11	10.85	high	Yes	Yes	eggNOG, Hieranoid, Inparanoid, Isobase, OrthoDB, OrthoFinder, OrthoInspector, orthoMCL, Panther, Phylome, RoundUp
rs2074158	DNAJC7	CAD	Van_Der_Harst_and_Verweij_2018	7266	12392	DNAJC7	Fly	34984	FBgn0032586	Tpr2	13	12.87	high	Yes	Yes	eggNOG, Hieranoid, Homologene, Inparanoid, OMA, OrthoDB, OrthoFinder, OrthoInspector, orthoMCL, Panther, Phylome, RoundUp, TreeFam
rs2074158	KAT2A	CAD	Van_Der_Harst_and_Verweij_2018	2648	4201	KAT2A	Fly	39431	FBgn0020388	Gcn5	13	12.87	high	Yes	Yes	eggNOG, Hieranoid, Homologene, Inparanoid, OMA, OrthoDB, OrthoFinder, OrthoInspector, orthoMCL, Panther, Phylome, RoundUp, TreeFam
rs2074158	RAB5C	CAD	Van_Der_Harst_and_Verweij_2018	5878	9785	RAB5C	Fly	33418	FBgn0014010	Rab5	13	12.7	high	Yes	Yes	Compara, eggNOG, Hieranoid, Homologene, Inparanoid, OMA, OrthoDB, OrthoFinder, OrthoInspector, orthoMCL, Phylome, RoundUp, TreeFam
rs9964304	ACAA2	CAD	Van_Der_Harst_and_Verweij_2018	10449	83	ACAA2	Fly	34313	FBgn0040064	yip2	15	14.75	high	Yes	Yes	Compara, eggNOG, Hieranoid, Homologene, Inparanoid, Isobase, OMA, OrthoDB, OrthoFinder, OrthoInspector, orthoMCL, Panther, Phylome, RoundUp, TreeFam
rs73015714	FCHO1	CAD	Van_Der_Harst_and_Verweij_2018	23149	29002	FCHO1	Fly	261329	FBgn0037702	CG8176	11	10.77	high	Yes	Yes	Compara, eggNOG, Hieranoid, Inparanoid, OMA, OrthoDB, OrthoFinder, orthoMCL, Panther, Phylome, TreeFam
rs6102343	TOP1	CAD	Van_Der_Harst_and_Verweij_2018	7150	11986	TOP1	Fly	32458	FBgn0004924	Top1	13	12.87	high	Yes	Yes	eggNOG, Hieranoid, Homologene, Inparanoid, OMA, OrthoDB, OrthoFinder, OrthoInspector, orthoMCL, Panther, Phylome, RoundUp, TreeFam
rs6102343	PLCG1	CAD	Van_Der_Harst_and_Verweij_2018	5335	9065	PLCG1	Fly	32601	FBgn0003416	sl	13	12.81	high	Yes	Yes	eggNOG, Hieranoid, Homologene, Inparanoid, Isobase, OMA, OrthoFinder, OrthoInspector, orthoMCL, Panther, Phylome, RoundUp, TreeFam
rs3827066	PCIF1	CAD	Van_Der_Harst_and_Verweij_2018	63935	16200	PCIF1	Fly	40295	FBgn0037021	CG11399	13	12.89	high	Yes	Yes	Compara, eggNOG, Hieranoid, Homologene, Inparanoid, OMA, OrthoDB, OrthoFinder, OrthoInspector, orthoMCL, Panther, RoundUp, TreeFam
rs3827066	ZNF335	CAD	Van_Der_Harst_and_Verweij_2018	63925	15807	ZNF335	Fly	37935	FBgn0035036	CG4707	2	2.03	high	Yes	Yes	Compara, Panther
rs3827066	ZNF335	CAD	Van_Der_Harst_and_Verweij_2018	63925	15807	ZNF335	Fly	36825	FBgn0034114	CG4282	2	2.03	high	Yes	Yes	Compara, Panther
rs3827066	ZNF335	CAD	Van_Der_Harst_and_Verweij_2018	63925	15807	ZNF335	Fly	41244	FBgn0037794	CG6254	2	2.03	high	Yes	Yes	Compara, Panther
rs3827066	ZNF335	CAD	Van_Der_Harst_and_Verweij_2018	63925	15807	ZNF335	Fly	35258	FBgn0032814	CG10366	2	2.03	high	Yes	Yes	Compara, Panther
rs3827066	ZNF335	CAD	Van_Der_Harst_and_Verweij_2018	63925	15807	ZNF335	Fly	36763	FBgn0034062	CG8388	2	2.03	high	Yes	Yes	Compara, Panther
rs3827066	NEURL2	CAD	Van_Der_Harst_and_Verweij_2019	140825	16156	NEURL2	Fly	37959	FBgn0035059	CG3894	14	13.82	high	Yes	Yes	eggNOG, Hieranoid, Homologene, Inparanoid, Isobase, OMA, OrthoDB, OrthoFinder, OrthoInspector, orthoMCL, Panther, Phylome, RoundUp, TreeFam
NA	APOB	CAD	Deloukas_et_al_2012	338	603	APOB	Fly	34283	FBgn0032136	Apoltp	4	3.79	high	Yes	Yes	eggNOG, Isobase, Phylome, RoundUp
NA	APOB	CAD	Deloukas_et_al_2012	338	603	APOB	Fly	43827	FBgn0087002	apolpp	4	3.79	high	Yes	Yes	eggNOG, Isobase, Phylome, RoundUp
NA	WDR35	CAD	Lu_et_al_2012	57539	29250	WDR35	Fly	38219	FBgn0035264	Oseg4	14	13.8	high	Yes	Yes	Compara, eggNOG, Hieranoid, Homologene, Inparanoid, OMA, OrthoDB, OrthoFinder, OrthoInspector, orthoMCL, Panther, Phylome, RoundUp, TreeFam
NA	ABCG8	CAD	Deloukas_et_al_2012	64241	13887	ABCG8	Fly	42975	FBgn0051121	CG31121	4	3.94	high	Yes	Yes	Compara, eggNOG, OrthoDB, Panther
NA	ZEB2	CAD	Deloukas_et_al_2012	9839	14881	ZEB2	Fly	43650	FBgn0004606	zfh1	10	9.8	high	Yes	Yes	eggNOG, Inparanoid, Isobase, OrthoFinder, OrthoInspector, orthoMCL, Panther, Phylome, RoundUp, TreeFam
NA	SLC22A4	CAD	Deloukas_et_al_2012	6583	10968	SLC22A4	Fly	42891	FBgn0019952	Orct	8	7.81	high	Yes	Yes	Compara, eggNOG, Isobase, OrthoFinder, OrthoInspector, orthoMCL, Panther, RoundUp
NA	PHACTR1	CAD	Schunkert_et_al_2011	221692	20990	PHACTR1	Fly	38438	FBgn0052264	CG32264	8	8.01	high	Yes	Yes	Compara, eggNOG, Hieranoid, Inparanoid, OrthoFinder, OrthoInspector, Panther, RoundUp
NA	LIPA	CAD	Deloukas_et_al_2012	3988	6617	LIPA	Fly	41643	FBgn0023495	Lip3	13	12.79	high	Yes	Yes	Compara, eggNOG, Hieranoid, Inparanoid, Isobase, OMA, OrthoDB, OrthoFinder, OrthoInspector, orthoMCL, Panther, Phylome, RoundUp
NA	ZNF259	CAD	Schunkert_et_al_2011	8882	13051	ZPR1	Fly	31851	FBgn0030096	Zpr1	13	12.77	high	Yes	Yes	Compara, eggNOG, Hieranoid, Homologene, Inparanoid, OMA, OrthoDB, OrthoFinder, OrthoInspector, orthoMCL, Panther, Phylome, TreeFam
NA	FLT1	CAD	Deloukas_et_al_2012	2321	3763	FLT1	Fly	34127	FBgn0032006	Pvr	10	9.77	high	Yes	Yes	eggNOG, Hieranoid, Inparanoid, OMA, OrthoDB, OrthoInspector, orthoMCL, Phylome, RoundUp, TreeFam
NA	COL4A1	CAD	Schunkert_et_al_2011	1282	2202	COL4A1	Fly	33727	FBgn0000299	Col4a1	9	8.9	high	Yes	Yes	eggNOG, Hieranoid, Inparanoid, OMA, OrthoDB, OrthoFinder, OrthoInspector, orthoMCL, RoundUp
NA	FURIN	CAD	Deloukas_et_al_2012	5045	8568	FURIN	Fly	47220	FBgn0004509	Fur1	10	9.76	high	Yes	Yes	eggNOG, Isobase, OMA, OrthoFinder, OrthoInspector, orthoMCL, Panther, Phylome, RoundUp, TreeFam
NA	RASD1	CAD	Schunkert_et_al_2011	51655	15828	RASD1	Fly	38771	FBgn0035733	CG8641	13	12.81	high	Yes	Yes	eggNOG, Hieranoid, Homologene, Inparanoid, Isobase, OrthoDB, OrthoFinder, OrthoInspector, orthoMCL, Panther, Phylome, RoundUp, TreeFam
NA	SMG6	CAD	Schunkert_et_al_2011	23293	17809	SMG6	Fly	42994	FBgn0039260	Smg6	11	10.88	high	Yes	Yes	Compara, eggNOG, Hieranoid, Inparanoid, OrthoDB, OrthoFinder, OrthoInspector, orthoMCL, Panther, RoundUp, TreeFam
NA	MRPS6	CAD	Schunkert_et_al_2011	64968	14051	MRPS6	Fly	38535	FBgn0035534	mRpS6	11	10.86	high	Yes	Yes	eggNOG, Hieranoid, Inparanoid, OMA, OrthoFinder, OrthoInspector, orthoMCL, Panther, Phylome, RoundUp, TreeFam
rs11810571	TDRKH	CAD	Verweij et al.2017	11022	11713	TDRKH	Fly	33401	FBgn0031401	papi	11	10.91	high	Yes	Yes	eggNOG, Hieranoid, Inparanoid, OMA, OrthoDB, OrthoFinder, OrthoInspector, orthoMCL, Panther, Phylome, RoundUp
rs7623687	RHOA	CAD	Verweij et al.2017	387	667	RHOA	Fly	36775	FBgn0014020	Rho1	13	12.8	high	Yes	Yes	Compara, eggNOG, Hieranoid, Inparanoid, OMA, OrthoDB, OrthoFinder, OrthoInspector, orthoMCL, Panther, Phylome, RoundUp, TreeFam
rs142695226	UMPS	CAD	Verweij et al.2017	7372	12563	UMPS	Fly	42493	FBgn0003257	r-l	14	13.7	high	Yes	Yes	Compara, eggNOG, Hieranoid, Homologene, Isobase, OMA, OrthoDB, OrthoFinder, OrthoInspector, orthoMCL, Panther, Phylome, RoundUp, TreeFam
rs10857147	PRDM8	CAD	Verweij et al.2017	56978	13993	PRDM8	Fly	38660	FBgn0035643	CG13287	8	7.87	high	Yes	Yes	Compara, eggNOG, Isobase, OrthoFinder, OrthoInspector, Panther, RoundUp, TreeFam
rs11723436	MAD2L1	CAD	Verweij et al.2017	4085	6763	MAD2L1	Fly	38656	FBgn0035640	mad2	14	13.8	high	Yes	Yes	Compara, eggNOG, Hieranoid, Homologene, Inparanoid, OMA, OrthoDB, OrthoFinder, OrthoInspector, orthoMCL, Panther, Phylome, RoundUp, TreeFam
rs1351525	ARNTL	CAD	Verweij et al.2017	406	701	ARNTL	Fly	40162	FBgn0023094	cyc	12	11.86	high	Yes	Yes	eggNOG, Hieranoid, Homologene, Inparanoid, OrthoDB, OrthoFinder, OrthoInspector, orthoMCL, Panther, Phylome, RoundUp, TreeFam
rs11170820	HOXC4	CAD	Verweij et al.2017	3221	5126	HOXC4	Fly	40832	FBgn0000439	Dfd	5	5.03	high	Yes	Yes	eggNOG, OrthoFinder, OrthoInspector, Panther, RoundUp
rs3832966	TMED10	CAD	Verweij et al.2017	10972	16998	TMED10	Fly	42996	FBgn0045866	bai	14	13.8	high	Yes	Yes	Compara, eggNOG, Hieranoid, Homologene, Inparanoid, OMA, OrthoDB, OrthoFinder, OrthoInspector, orthoMCL, Panther, Phylome, RoundUp, TreeFam
rs33928862	BCAR1	CAD	Verweij et al.2017	9564	971	BCAR1	Fly	38021	FBgn0035101	p130CAS	13	12.8	high	Yes	Yes	Compara, eggNOG, Hieranoid, Inparanoid, OMA, OrthoDB, OrthoFinder, OrthoInspector, orthoMCL, Panther, Phylome, RoundUp, TreeFam
rs7500448	CDH13	CAD	Verweij et al.2017	1012	1753	CDH13	Fly	35071	FBgn0262018	CadN2	2	2.01	high	Yes	Yes	Panther, Phylome
rs138120077	HNRNPUL1	CAD	Verweij et al.2017	11100	17011	HNRNPUL1	Fly	37146	FBgn0050122	CG30122	11	10.8	high	Yes	Yes	eggNOG, Hieranoid, Inparanoid, Isobase, OrthoFinder, OrthoInspector, orthoMCL, Panther, Phylome, RoundUp, TreeFam
rs8108632	TGFB1	CAD	Verweij et al.2017	7040	11766	TGFB1	Fly	33474	FBgn0031461	daw	4	3.97	high	Yes	Yes	eggNOG, OMA, Panther, TreeFam
rs8108632	TGFB1	CAD	Verweij et al.2017	7040	11766	TGFB1	Fly	33474	FBgn0031461	daw	4	3.97	high	Yes	Yes	eggNOG, OMA, Panther, TreeFam
rs7623687	AMT	CAD	Verweij et al.2017	275	473	AMT	Fly	34474	FBgn0032287	CG6415	14	13.84	high	Yes	Yes	Compara, eggNOG, Hieranoid, Homologene, Inparanoid, Isobase, OMA, OrthoDB, OrthoFinder, OrthoInspector, orthoMCL, Panther, RoundUp, TreeFam
rs433903	DHX36	CAD	Verweij et al.2017	170506	14410	DHX36	Fly	35339	FBgn0032883	Rhau	15	14.75	high	Yes	Yes	Compara, eggNOG, Hieranoid, Homologene, Inparanoid, Isobase, OMA, OrthoDB, OrthoFinder, OrthoInspector, orthoMCL, Panther, Phylome, RoundUp, TreeFam
rs11723436	PDE5A	CAD	Verweij et al.2017	8654	8784	PDE5A	Fly	35107	FBgn0085370	Pde11	11	10.75	high	Yes	Yes	Compara, eggNOG, Hieranoid, Homologene, OMA, OrthoDB, orthoMCL, Panther, Phylome, RoundUp, TreeFam
rs3832966	RPS6KL1	CAD	Verweij et al.2017	83694	20222	RPS6KL1	Fly	42187	FBgn0038588	CG7156	12	11.85	high	Yes	Yes	Compara, eggNOG, Hieranoid, Inparanoid, Isobase, OMA, OrthoDB, OrthoFinder, Panther, Phylome, RoundUp, TreeFam
rs3832966	EIF2B2	CAD	Verweij et al.2017	8892	3258	EIF2B2	Fly	31256	FBgn0024996	eIF2Bbeta	15	14.75	high	Yes	Yes	Compara, eggNOG, Hieranoid, Homologene, Inparanoid, Isobase, OMA, OrthoDB, OrthoFinder, OrthoInspector, orthoMCL, Panther, Phylome, RoundUp, TreeFam
rs3832966	ACYP1	CAD	Verweij et al.2017	97	179	ACYP1	Fly	41910	FBgn0038363	Acyp2	10	9.91	high	Yes	Yes	eggNOG, Hieranoid, OMA, OrthoDB, OrthoFinder, OrthoInspector, orthoMCL, Panther, RoundUp, TreeFam
rs138120077	TGFB1	CAD	Verweij et al.2017	7040	11766	TGFB1	Fly	33474	FBgn0031461	daw	4	3.97	high	Yes	Yes	eggNOG, OMA, Panther, TreeFam
rs138120077	TGFB1	CAD	Verweij et al.2017	7040	11766	TGFB1	Fly	33474	FBgn0031461	daw	4	3.97	high	Yes	Yes	eggNOG, OMA, Panther, TreeFam
rs8108632	B9D2	CAD	Verweij et al.2017	80776	28636	B9D2	Fly	10178891	FBgn0261683	B9d2	9	8.9	high	Yes	Yes	Compara, eggNOG, Hieranoid, Homologene, OMA, OrthoFinder, OrthoInspector, Panther, TreeFam
rs138120077	CCDC97	CAD	Verweij et al.2017	90324	28289	CCDC97	Fly	34139	FBgn0032017	CG7810	12	11.79	high	Yes	Yes	Compara, eggNOG, Hieranoid, Inparanoid, OMA, OrthoFinder, OrthoInspector, orthoMCL, Panther, Phylome, RoundUp, TreeFam
rs1892094	ATP1B1	CAD	Howson_et_al_2017	481	804	ATP1B1	Fly	35408	FBgn0032946	nrv3	14	13.8	high	Yes	Yes	Compara, eggNOG, Hieranoid, Homologene, Inparanoid, OMA, OrthoDB, OrthoFinder, OrthoInspector, orthoMCL, Panther, Phylome, RoundUp, TreeFam
rs1892094	ATP1B1	CAD	Howson_et_al_2017	481	804	ATP1B1	Fly	33952	FBgn0015776	nrv1	14	13.75	high	Yes	Yes	Compara, eggNOG, Hieranoid, Inparanoid, Isobase, OMA, OrthoDB, OrthoFinder, OrthoInspector, orthoMCL, Panther, Phylome, RoundUp, TreeFam
rs6700559	CAMSAP2	CAD	Howson_et_al_2017	23271	29188	CAMSAP2	Fly	36978	FBgn0263197	Patronin	13	12.8	high	Yes	Yes	Compara, eggNOG, Hieranoid, Inparanoid, OMA, OrthoDB, OrthoFinder, OrthoInspector, orthoMCL, Panther, Phylome, RoundUp, TreeFam
rs246600	ARHGAP26	CAD	Howson_et_al_2017	23092	17073	ARHGAP26	Fly	32522	FBgn0030685	Graf	14	13.82	high	Yes	Yes	eggNOG, Hieranoid, Homologene, Inparanoid, Isobase, OMA, OrthoDB, OrthoFinder, OrthoInspector, orthoMCL, Panther, Phylome, RoundUp, TreeFam
rs12801636	PCNX3	CAD	Howson_et_al_2017	399909	18760	PCNX3	Fly	31204	FBgn0003048	pcx	12	11.79	high	Yes	Yes	Compara, eggNOG, Hieranoid, Inparanoid, OrthoDB, OrthoFinder, OrthoInspector, orthoMCL, Panther, Phylome, RoundUp, TreeFam
rs590121	SERPINH1	CAD	Howson_et_al_2017	871	1546	SERPINH1	Fly	34339	FBgn0032178	Spn31A	2	1.92	high	Yes	Yes	OrthoDB, Phylome
rs11057830	SCARB1	CAD	Howson_et_al_2017	949	1664	SCARB1	Fly	33219	FBgn0015924	crq	8	7.85	high	Yes	Yes	eggNOG, Hieranoid, Homologene, OrthoDB, orthoMCL, Panther, Phylome, RoundUp
rs6494488	OAZ2	CAD	Howson_et_al_2017	4947	8096	OAZ2	Fly	36307	FBgn0014184	Oda	9	8.96	high	Yes	Yes	eggNOG, Inparanoid, OrthoDB, OrthoFinder, OrthoInspector, Panther, Phylome, RoundUp, TreeFam
rs1050362	DHX38	CAD	Howson_et_al_2017	9785	17211	DHX38	Fly	32373	FBgn0026713	l(1)G0007	13	12.78	high	Yes	Yes	Compara, eggNOG, Hieranoid, Homologene, Inparanoid, Isobase, OrthoDB, OrthoFinder, OrthoInspector, orthoMCL, Panther, Phylome, RoundUp
rs17608766	GOSR2	CAD	Howson_et_al_2017	9570	4431	GOSR2	Fly	38614	FBgn0260856	Membrin	13	12.87	high	Yes	Yes	eggNOG, Hieranoid, Homologene, Inparanoid, OMA, OrthoDB, OrthoFinder, OrthoInspector, orthoMCL, Panther, Phylome, RoundUp, TreeFam
rs12500824	Septin11	CAD	Van_Der_Harst_and_Verweij_2018	55752	25589	SEPTIN11	Fly	42438	FBgn0014029	2002-09-01	14	13.75	high	Yes	Yes	Compara, eggNOG, Hieranoid, Inparanoid, Isobase, OMA, OrthoDB, OrthoFinder, OrthoInspector, orthoMCL, Panther, Phylome, RoundUp, TreeFam
NA	PPAP2B	CAD	Schunkert_et_al_2011	8613	9229	PLPP3	Fly	53558	FBgn0041087	wun2	12	11.79	high	Yes	Yes	Compara, eggNOG, Hieranoid, Inparanoid, OrthoDB, OrthoFinder, OrthoInspector, orthoMCL, Panther, Phylome, RoundUp, TreeFam
NA	WDR12	CAD	Schunkert_et_al_2011	55759	14098	WDR12	Fly	34488	FBgn0032298	CG6724	14	13.8	high	Yes	Yes	Compara, eggNOG, Hieranoid, Homologene, Inparanoid, OMA, OrthoDB, OrthoFinder, OrthoInspector, orthoMCL, Panther, Phylome, RoundUp, TreeFam
NA	ANKS1A	CAD	Schunkert_et_al_2011	23294	20961	ANKS1A	Fly	42764	FBgn0039075	CG4393	11	10.87	high	Yes	Yes	Compara, eggNOG, Hieranoid, Inparanoid, OMA, OrthoDB, OrthoFinder, OrthoInspector, Panther, Phylome, TreeFam
NA	ANKS1A	CAD	Schunkert_et_al_2011	23294	20961	ANKS1A	Fly	42981	FBgn0039249	CG11168	11	10.74	high	Yes	Yes	Compara, eggNOG, Hieranoid, OrthoDB, OrthoFinder, OrthoInspector, orthoMCL, Panther, Phylome, RoundUp, TreeFam
NA	TCF21	CAD	Schunkert_et_al_2011	6943	11632	TCF21	Fly	37027	FBgn0022740	HLH54F	7	6.86	high	Yes	Yes	Compara, eggNOG, OrthoFinder, OrthoInspector, orthoMCL, Panther, RoundUp
NA	LPL	CAD	Deloukas_et_al_2012	4023	6677	LPL	Fly	43250	FBgn0039474	CG6283	3	2.98	high	Yes	Yes	Compara, Isobase, Panther
NA	LPL	CAD	Deloukas_et_al_2012	4023	6677	LPL	Fly	43252	FBgn0039476	CG6271	3	2.98	high	Yes	Yes	Compara, Isobase, Panther
NA	BRAP	CAD	Takeuchi_et_al_2012	8315	1099	BRAP	Fly	42302	FBgn0038686	CG5555	14	13.72	high	Yes	Yes	Compara, eggNOG, Hieranoid, Homologene, Inparanoid, Isobase, OMA, OrthoDB, OrthoFinder, OrthoInspector, orthoMCL, Panther, Phylome, TreeFam
NA	ADAMTS7	CAD	Schunkert_et_al_2011	11173	223	ADAMTS7	Fly	31490	FBgn0029791	CG4096	11	10.89	high	Yes	Yes	Compara, eggNOG, Homologene, Inparanoid, OrthoDB, OrthoFinder, OrthoInspector, Panther, Phylome, RoundUp, TreeFam
rs699	AGT	CAD	Van_Der_Harst_and_Verweij_2018	183	333	AGT	Fly	35519	FBgn0263109	CG43366	1	1.1	low	Yes	Yes	Panther
rs699	AGT	CAD	Van_Der_Harst_and_Verweij_2018	183	333	AGT	Fly	35599	FBgn0033112	Spn42Db	1	1.1	low	Yes	No	Panther
rs699	AGT	CAD	Van_Der_Harst_and_Verweij_2018	183	333	AGT	Fly	43642	FBgn0039795	Spn100A	1	1.1	low	Yes	Yes	Panther
rs699	AGT	CAD	Van_Der_Harst_and_Verweij_2018	183	333	AGT	Fly	36163	FBgn0033574	Spn47C	1	1.1	low	Yes	No	Panther
rs699	AGT	CAD	Van_Der_Harst_and_Verweij_2018	183	333	AGT	Fly	40234	FBgn0262057	Spn77Ba	1	1.1	low	Yes	No	Panther
rs699	AGT	CAD	Van_Der_Harst_and_Verweij_2018	183	333	AGT	Fly	49808	FBgn0028988	Spn42Dd	1	1.1	low	Yes	No	Panther
rs699	AGT	CAD	Van_Der_Harst_and_Verweij_2018	183	333	AGT	Fly	45908	FBgn0002930	nec	1	1.1	low	Yes	No	Panther
rs699	AGT	CAD	Van_Der_Harst_and_Verweij_2018	183	333	AGT	Fly	45815	FBgn0028990	Spn27A	1	1.1	low	Yes	No	Panther
rs699	AGT	CAD	Van_Der_Harst_and_Verweij_2018	183	333	AGT	Fly	49807	FBgn0028987	Spn28F	1	1.1	low	Yes	No	Panther
rs699	AGT	CAD	Van_Der_Harst_and_Verweij_2018	183	333	AGT	Fly	49805	FBgn0265137	Spn42Da	1	1.1	low	Yes	No	Panther
rs699	AGT	CAD	Van_Der_Harst_and_Verweij_2018	183	333	AGT	Fly	34091	FBgn0031973	Spn28Dc	1	1.1	low	Yes	No	Panther
rs699	AGT	CAD	Van_Der_Harst_and_Verweij_2018	183	333	AGT	Fly	40236	FBgn0036970	Spn77Bc	1	1.1	low	Yes	No	Panther
rs699	AGT	CAD	Van_Der_Harst_and_Verweij_2018	183	333	AGT	Fly	317912	FBgn0052203	Spn75F	1	1.1	low	Yes	No	Panther
rs699	AGT	CAD	Van_Der_Harst_and_Verweij_2018	183	333	AGT	Fly	34339	FBgn0032178	Spn31A	1	1.1	low	Yes	No	Panther
rs699	AGT	CAD	Van_Der_Harst_and_Verweij_2018	183	333	AGT	Fly	41221	FBgn0037772	Spn85F	1	1.1	low	Yes	Yes	Panther
rs699	AGT	CAD	Van_Der_Harst_and_Verweij_2018	183	333	AGT	Fly	34082	FBgn0051902	Spn28Da	1	1.1	low	Yes	No	Panther
rs699	AGT	CAD	Van_Der_Harst_and_Verweij_2018	183	333	AGT	Fly	40235	FBgn0036969	Spn77Bb	1	1.1	low	Yes	No	Panther
rs699	AGT	CAD	Van_Der_Harst_and_Verweij_2018	183	333	AGT	Fly	49803	FBgn0028983	Spn55B	1	1.1	low	Yes	No	Panther
rs699	AGT	CAD	Van_Der_Harst_and_Verweij_2018	183	333	AGT	Fly	45040	FBgn0024293	Spn43Ab	1	1.1	low	Yes	No	Panther
rs699	AGT	CAD	Van_Der_Harst_and_Verweij_2018	183	333	AGT	Fly	35602	FBgn0033115	Spn42De	1	1.1	low	Yes	No	Panther
rs699	AGT	CAD	Van_Der_Harst_and_Verweij_2018	183	333	AGT	Fly	35600	FBgn0033113	Spn42Dc	1	1.1	low	Yes	No	Panther
rs699	AGT	CAD	Van_Der_Harst_and_Verweij_2018	183	333	AGT	Fly	34035	FBgn0083141	Spn28B	1	1.1	low	Yes	No	Panther
rs699	AGT	CAD	Van_Der_Harst_and_Verweij_2018	183	333	AGT	Fly	49804	FBgn0028984	Spn88Ea	1	1.1	low	Yes	No	Panther
rs699	AGT	CAD	Van_Der_Harst_and_Verweij_2018	183	333	AGT	Fly	35639	FBgn0044011	Spn43Ad	1	1.1	low	Yes	No	Panther
rs699	AGT	CAD	Van_Der_Harst_and_Verweij_2018	183	333	AGT	Fly	49806	FBgn0028986	Spn38F	1	1.1	low	Yes	No	Panther
rs699	AGT	CAD	Van_Der_Harst_and_Verweij_2018	183	333	AGT	Fly	326261	FBgn0053121	Spn28Db	1	1.1	low	Yes	No	Panther
rs699	AGT	CAD	Van_Der_Harst_and_Verweij_2018	183	333	AGT	Fly	36931	FBgn0034195	Spn53F	1	1.1	low	Yes	No	Panther
rs699	AGT	CAD	Van_Der_Harst_and_Verweij_2018	183	333	AGT	Fly	41829	FBgn0038299	Spn88Eb	1	1.1	low	Yes	No	Panther
rs699	AGT	CAD	Van_Der_Harst_and_Verweij_2018	183	333	AGT	Fly	45041	FBgn0024294	Spn43Aa	1	1.1	low	Yes	No	Panther
rs11677932	COL6A3	CAD	Van_Der_Harst_and_Verweij_2018	1293	2213	COL6A3	Fly	38769	FBgn0260660	Mp	1	1.1	low	Yes	No	Panther
rs11677932	COL6A3	CAD	Van_Der_Harst_and_Verweij_2018	1293	2213	COL6A3	Fly	33590	FBgn0031559	CG3513	1	0.95	low	Yes	No	Isobase
rs11677932	COL6A3	CAD	Van_Der_Harst_and_Verweij_2018	1293	2213	COL6A3	Fly	43777	FBgn0051999	CG31999	1	0.91	low	Yes	No	Phylome
rs4266144	TIPARP	CAD	Van_Der_Harst_and_Verweij_2018	25976	23696	TIPARP	Fly	43095	FBgn0027508	Tnks	1	0.91	low	Yes	No	Phylome
rs7617773	ZNF589	CAD	Van_Der_Harst_and_Verweij_2018	51385	16747	ZNF589	Fly	39228	FBgn0013469	klu	1	1.1	low	Yes	No	Panther
rs7617773	ZNF589	CAD	Van_Der_Harst_and_Verweij_2018	51385	16747	ZNF589	Fly	39697	FBgn0036522	CG7372	1	0.93	low	Yes	No	Compara
rs7617773	ZNF589	CAD	Van_Der_Harst_and_Verweij_2018	51385	16747	ZNF589	Fly	41445	FBgn0260741	CG3281	1	0.93	low	Yes	Yes	Compara
rs7617773	ZNF589	CAD	Van_Der_Harst_and_Verweij_2018	51385	16747	ZNF589	Fly	31267	FBgn0024975	CG2712	1	0.93	low	Yes	No	Compara
rs7617773	ZNF589	CAD	Van_Der_Harst_and_Verweij_2018	51385	16747	ZNF589	Fly	31743	FBgn0030010	CG10959	1	0.91	low	Yes	No	Phylome
rs7617773	SPINK8	CAD	Van_Der_Harst_and_Verweij_2018	646424	33160	SPINK8	Fly	19835723	FBgn0266363	CG45011	1	1.01	low	Yes	No	OrthoDB
rs7617773	SPINK8	CAD	Van_Der_Harst_and_Verweij_2018	646424	33160	SPINK8	Fly	14462750	FBgn0264750	CG44008	1	1.01	low	Yes	No	OrthoDB
rs7617773	SPINK8	CAD	Van_Der_Harst_and_Verweij_2018	646424	33160	SPINK8	Fly	19834795	FBgn0266364	CG45012	1	1.01	low	Yes	No	OrthoDB
rs7617773	SPINK8	CAD	Van_Der_Harst_and_Verweij_2018	646424	33160	SPINK8	Fly	8674115	FBgn0259964	Sfp33A3	1	1.01	low	Yes	No	OrthoDB
rs7617773	SPINK8	CAD	Van_Der_Harst_and_Verweij_2018	646424	33160	SPINK8	Fly	318906	FBgn0051704	CG31704	1	1.01	low	Yes	No	OrthoDB
rs7696431	DDX60L	CAD	Van_Der_Harst_and_Verweij_2018	91351	26429	DDX60L	Fly	41571	FBgn0002905	mus308	1	0.9	low	Yes	No	eggNOG
rs7696431	DDX60L	CAD	Van_Der_Harst_and_Verweij_2018	91351	26429	DDX60L	Fly	44747	FBgn0026252	msk	1	0.9	low	Yes	No	eggNOG
rs7696431	DDX60L	CAD	Van_Der_Harst_and_Verweij_2018	91351	26429	DDX60L	Fly	34792	FBgn0004406	tam	1	0.9	low	Yes	No	eggNOG
rs7696431	DDX60L	CAD	Van_Der_Harst_and_Verweij_2018	91351	26429	DDX60L	Fly	42813	FBgn0039117	tst	1	0.9	low	Yes	No	eggNOG
rs7696431	DDX60L	CAD	Van_Der_Harst_and_Verweij_2018	91351	26429	DDX60L	Fly	38905	FBgn0002899	mus301	1	0.9	low	Yes	No	eggNOG
rs7696431	DDX60L	CAD	Van_Der_Harst_and_Verweij_2018	91351	26429	DDX60L	Fly	48782	FBgn0001986	Mtr4	1	0.9	low	Yes	No	eggNOG
rs16844401	HGFAC	CAD	Van_Der_Harst_and_Verweij_2018	3083	4894	HGFAC	Fly	35902	FBgn0286782	flz	1	0.91	low	Yes	Yes	Phylome
rs16844401	HGFAC	CAD	Van_Der_Harst_and_Verweij_2018	3083	4894	HGFAC	Fly	38687	FBgn0035669	CG6592	1	0.91	low	Yes	Yes	Phylome
rs16844401	HGFAC	CAD	Van_Der_Harst_and_Verweij_2018	3083	4894	HGFAC	Fly	36445	FBgn0020391	Nrk	1	0.91	low	Yes	No	Phylome
rs16844401	HGFAC	CAD	Van_Der_Harst_and_Verweij_2018	3083	4894	HGFAC	Fly	38681	FBgn0035663	CG6462	1	0.91	low	Yes	No	Phylome
rs11509880	THSD7A	CAD	Van_Der_Harst_and_Verweij_2018	221981	22207	THSD7A	Fly	37762	FBgn0034903	sona	1	0.9	low	Yes	No	eggNOG
rs11509880	THSD7A	CAD	Van_Der_Harst_and_Verweij_2018	221981	22207	THSD7A	Fly	35424	FBgn0051619	nolo	1	0.9	low	Yes	No	eggNOG
rs11509880	THSD7A	CAD	Van_Der_Harst_and_Verweij_2018	221981	22207	THSD7A	Fly	31490	FBgn0029791	CG4096	1	0.9	low	Yes	No	eggNOG
rs11509880	THSD7A	CAD	Van_Der_Harst_and_Verweij_2018	221981	22207	THSD7A	Fly	41887	FBgn0286071	AdamTS-A	1	0.9	low	Yes	No	eggNOG
rs11509880	THSD7A	CAD	Van_Der_Harst_and_Verweij_2018	221981	22207	THSD7A	Fly	318845	FBgn0051609	CG31609	1	0.9	low	Yes	No	eggNOG
rs11509880	THSD7A	CAD	Van_Der_Harst_and_Verweij_2018	221981	22207	THSD7A	Fly	34435	FBgn0032252	loh	1	0.9	low	Yes	No	eggNOG
rs11509880	THSD7A	CAD	Van_Der_Harst_and_Verweij_2018	221981	22207	THSD7A	Fly	43872	FBgn0003137	Ppn	1	0.9	low	Yes	No	eggNOG
rs11509880	THSD7A	CAD	Van_Der_Harst_and_Verweij_2018	221981	22207	THSD7A	Fly	37619	FBgn0086408	stl	1	0.9	low	Yes	No	eggNOG
rs4918072	SH3PXD2A	CAD	Van_Der_Harst_and_Verweij_2018	9644	23664	SH3PXD2A	Fly	43654	FBgn0027598	cindr	1	1.01	low	Yes	No	OMA
rs4918072	SH3PXD2A	CAD	Van_Der_Harst_and_Verweij_2018	9644	23664	SH3PXD2A	Fly	37733	FBgn0015277	Pi3K59F	1	0.9	low	Yes	No	eggNOG
rs4918072	SH3PXD2A	CAD	Van_Der_Harst_and_Verweij_2018	9644	23664	SH3PXD2A	Fly	42446	FBgn0015279	Pi3K92E	1	0.9	low	Yes	No	eggNOG
rs4918072	SH3PXD2A	CAD	Van_Der_Harst_and_Verweij_2018	9644	23664	SH3PXD2A	Fly	31247	FBgn0267350	PI4KIIIalpha	1	0.9	low	Yes	No	eggNOG
rs4918072	SH3PXD2A	CAD	Van_Der_Harst_and_Verweij_2018	9644	23664	SH3PXD2A	Fly	47396	FBgn0021796	Tor	1	0.9	low	Yes	No	eggNOG
rs4918072	SH3PXD2A	CAD	Van_Der_Harst_and_Verweij_2018	9644	23664	SH3PXD2A	Fly	32608	FBgn0004367	mei-41	1	0.9	low	Yes	No	eggNOG
rs4918072	SH3PXD2A	CAD	Van_Der_Harst_and_Verweij_2018	9644	23664	SH3PXD2A	Fly	246506	FBgn0050184	CG30184	1	0.9	low	Yes	Yes	eggNOG
rs4918072	SH3PXD2A	CAD	Van_Der_Harst_and_Verweij_2018	9644	23664	SH3PXD2A	Fly	45374	FBgn0004373	fwd	1	0.9	low	Yes	No	eggNOG
rs4918072	SH3PXD2A	CAD	Van_Der_Harst_and_Verweij_2018	9644	23664	SH3PXD2A	Fly	35483	FBgn0053554	Nipped-A	1	0.9	low	Yes	No	eggNOG
rs4918072	SH3PXD2A	CAD	Van_Der_Harst_and_Verweij_2018	9644	23664	SH3PXD2A	Fly	31625	FBgn0263968	nonC	1	0.9	low	Yes	No	eggNOG
rs4918072	SH3PXD2A	CAD	Van_Der_Harst_and_Verweij_2018	9644	23664	SH3PXD2A	Fly	39329	FBgn0015278	Pi3K68D	1	0.9	low	Yes	No	eggNOG
rs11601507	TRIM5	CAD	Van_Der_Harst_and_Verweij_2018	85363	16276	TRIM5	Fly	34453	FBgn0051721	Trim9	1	0.91	low	Yes	No	Phylome
rs11601507	TRIM22	CAD	Van_Der_Harst_and_Verweij_2018	10346	16379	TRIM22	Fly	34453	FBgn0051721	Trim9	1	0.91	low	Yes	No	Phylome
rs13723	EFCAB5	CAD	Van_Der_Harst_and_Verweij_2018	374786	24801	EFCAB5	Fly	32288	FBgn0030474	CG15747	1	0.93	low	Yes	No	Compara
rs260020	ZNF831	CAD	Van_Der_Harst_and_Verweij_2018	128611	16167	ZNF831	Fly	31660	FBgn0029939	CG9650	1	0.93	low	Yes	No	Compara
rs2832227	BACH1	CAD	Van_Der_Harst_and_Verweij_2018	571	935	BACH1	Fly	32224	FBgn0030417	CG15725	1	1.1	low	Yes	Yes	Panther
rs2832227	BACH1	CAD	Van_Der_Harst_and_Verweij_2018	571	935	BACH1	Fly	49228	FBgn0002781	mod(mdg4)	1	1.05	low	Yes	No	Inparanoid
rs2832227	BACH1	CAD	Van_Der_Harst_and_Verweij_2018	571	935	BACH1	Fly	31523	FBgn0029822	CG12236	1	1.05	low	Yes	No	Inparanoid
rs2832227	BACH1	CAD	Van_Der_Harst_and_Verweij_2018	571	935	BACH1	Fly	32557	FBgn0030710	CG8924	1	1.05	low	Yes	No	Inparanoid
rs2832227	BACH1	CAD	Van_Der_Harst_and_Verweij_2018	571	935	BACH1	Fly	42743	FBgn0262975	cnc	1	0.9	low	Yes	No	eggNOG
NA	EDNRA	CAD	Deloukas_et_al_2012	1909	3179	EDNRA	Fly	35535	FBgn0033058	CCHa2-R	1	0.91	low	Yes	No	Phylome
NA	EDNRA	CAD	Deloukas_et_al_2012	1909	3179	EDNRA	Fly	37004	FBgn0050106	CCHa1-R	1	0.91	low	Yes	No	Phylome
NA	LPA	CAD	Schunkert_et_al_2011	4018	6667	LPA	Fly	2768846	FBgn0053458	CG33458	1	0.93	low	Yes	No	Compara
NA	LPA	CAD	Schunkert_et_al_2011	4018	6667	LPA	Fly	37651	FBgn0034807	CG9897	1	0.93	low	Yes	Yes	Compara
NA	LPA	CAD	Schunkert_et_al_2011	4018	6667	LPA	Fly	2768847	FBgn0053459	CG33459	1	0.93	low	Yes	No	Compara
NA	CYP17A1	CAD	Schunkert_et_al_2011	1586	2593	CYP17A1	Fly	32858	FBgn0010383	Cyp18a1	1	0.91	low	Yes	No	Phylome
NA	APOC3	CAD	Schunkert_et_al_2011	345	610	APOC3	Fly	36956	FBgn0025716	Bap55	1	1.01	low	Yes	No	OrthoDB
NA	APOC3	CAD	Schunkert_et_al_2011	345	610	APOC3	Fly	32514	FBgn0011741	Arp6	1	1.01	low	Yes	No	OrthoDB
NA	APOC3	CAD	Schunkert_et_al_2011	345	610	APOC3	Fly	41885	FBgn0000047	Act88F	1	1.01	low	Yes	No	OrthoDB
NA	APOC3	CAD	Schunkert_et_al_2011	345	610	APOC3	Fly	35526	FBgn0000043	Act42A	1	1.01	low	Yes	No	OrthoDB
NA	APOC3	CAD	Schunkert_et_al_2011	345	610	APOC3	Fly	42359	FBgn0038737	CG11447	1	1.01	low	Yes	No	OrthoDB
NA	APOC3	CAD	Schunkert_et_al_2011	345	610	APOC3	Fly	36879	FBgn0011743	Arp53D	1	1.01	low	Yes	No	OrthoDB
NA	APOC3	CAD	Schunkert_et_al_2011	345	610	APOC3	Fly	37368	FBgn0000044	Act57B	1	1.01	low	Yes	No	OrthoDB
NA	APOC3	CAD	Schunkert_et_al_2011	345	610	APOC3	Fly	31521	FBgn0000042	Act5C	1	1.01	low	Yes	No	OrthoDB
NA	APOC3	CAD	Schunkert_et_al_2011	345	610	APOC3	Fly	32623	FBgn0011742	Arp2	1	1.01	low	Yes	No	OrthoDB
NA	APOC3	CAD	Schunkert_et_al_2011	345	610	APOC3	Fly	40444	FBgn0000045	Act79B	1	1.01	low	Yes	No	OrthoDB
NA	APOC3	CAD	Schunkert_et_al_2011	345	610	APOC3	Fly	38898	FBgn0262716	Arp3	1	1.01	low	Yes	No	OrthoDB
NA	APOC3	CAD	Schunkert_et_al_2011	345	610	APOC3	Fly	41566	FBgn0011745	Arp1	1	1.01	low	Yes	No	OrthoDB
NA	APOC3	CAD	Schunkert_et_al_2011	345	610	APOC3	Fly	48632	FBgn0000046	Act87E	1	1.01	low	Yes	No	OrthoDB
rs35879803	ZNF827	CAD	Verweij et al.2017	152485	27193	ZNF827	Fly	37935	FBgn0035036	CG4707	1	1.1	low	Yes	No	Panther
rs35879803	ZNF827	CAD	Verweij et al.2017	152485	27193	ZNF827	Fly	36825	FBgn0034114	CG4282	1	1.1	low	Yes	No	Panther
rs35879803	ZNF827	CAD	Verweij et al.2017	152485	27193	ZNF827	Fly	39301	FBgn0036179	CG7368	1	1.1	low	Yes	Yes	Panther
rs35879803	ZNF827	CAD	Verweij et al.2017	152485	27193	ZNF827	Fly	31615	FBgn0286831	sov	1	1.1	low	Yes	Yes	Panther
rs35879803	ZNF827	CAD	Verweij et al.2017	152485	27193	ZNF827	Fly	36156	FBgn0050020	CG30020	1	1.1	low	Yes	Yes	Panther
rs35879803	ZNF827	CAD	Verweij et al.2017	152485	27193	ZNF827	Fly	38713	FBgn0035687	Prdm13	1	1.1	low	Yes	No	Panther
rs35879803	ZNF827	CAD	Verweij et al.2017	152485	27193	ZNF827	Fly	37155	FBgn0034379	CG15073	1	1.1	low	Yes	Yes	Panther
rs35879803	ZNF827	CAD	Verweij et al.2017	152485	27193	ZNF827	Fly	41244	FBgn0037794	CG6254	1	1.1	low	Yes	No	Panther
rs35879803	ZNF827	CAD	Verweij et al.2017	152485	27193	ZNF827	Fly	40351	FBgn0259785	pzg	1	1.1	low	Yes	Yes	Panther
rs35879803	ZNF827	CAD	Verweij et al.2017	152485	27193	ZNF827	Fly	41073	FBgn0260243	E(var)3-9	1	1.1	low	Yes	No	Panther
rs35879803	ZNF827	CAD	Verweij et al.2017	152485	27193	ZNF827	Fly	35843	FBgn0267792	rgr	1	1.1	low	Yes	Yes	Panther
rs35879803	ZNF827	CAD	Verweij et al.2017	152485	27193	ZNF827	Fly	35683	FBgn0033185	CG1603	1	1.1	low	Yes	Yes	Panther
rs35879803	ZNF827	CAD	Verweij et al.2017	152485	27193	ZNF827	Fly	31572	FBgn0043796	CG12219	1	1.1	low	Yes	Yes	Panther
rs35879803	ZNF827	CAD	Verweij et al.2017	152485	27193	ZNF827	Fly	35258	FBgn0032814	CG10366	1	1.1	low	Yes	No	Panther
rs35879803	ZNF827	CAD	Verweij et al.2017	152485	27193	ZNF827	Fly	34706	FBgn0032473	kmg	1	1.1	low	Yes	No	Panther
rs35879803	ZNF827	CAD	Verweij et al.2017	152485	27193	ZNF827	Fly	36763	FBgn0034062	CG8388	1	1.1	low	Yes	No	Panther
rs35879803	ZNF827	CAD	Verweij et al.2017	152485	27193	ZNF827	Fly	36171	FBgn0003396	shn	1	0.91	low	Yes	No	Phylome
rs7623687	CDHR4	CAD	Verweij et al.2017	389118	34527	CDHR4	Fly	41774	FBgn0038247	Cad88C	1	1.1	low	Yes	No	Panther
rs7623687	CDHR4	CAD	Verweij et al.2017	389118	34527	CDHR4	Fly	41441	FBgn0037963	Cad87A	1	1.1	low	Yes	Yes	Panther
rs7623687	CDHR4	CAD	Verweij et al.2017	389118	34527	CDHR4	Fly	40191	FBgn0261574	kug	1	0.9	low	Yes	No	eggNOG
rs7623687	CDHR4	CAD	Verweij et al.2017	389118	34527	CDHR4	Fly	33627	FBgn0001075	ft	1	0.9	low	Yes	No	eggNOG
rs7623687	CDHR4	CAD	Verweij et al.2017	389118	34527	CDHR4	Fly	318824	FBgn0053196	dpy	1	0.9	low	Yes	No	eggNOG
rs7623687	KLHDC8B	CAD	Verweij et al.2017	200942	28557	KLHDC8B	Fly	31799	FBgn0030053	CG12081	1	1.01	low	Yes	No	OrthoDB
rs7623687	KLHDC8B	CAD	Verweij et al.2017	200942	28557	KLHDC8B	Fly	3354863	FBgn0040038	klhl10	1	0.9	low	Yes	No	eggNOG
rs7623687	KLHDC8B	CAD	Verweij et al.2017	200942	28557	KLHDC8B	Fly	33049	FBgn0031119	CG1812	1	0.9	low	Yes	No	eggNOG
rs2244608	OASL	CAD	Verweij et al.2017	8638	8090	OASL	Fly	38456	FBgn0003943	Ubi-p63E	1	0.9	low	Yes	No	eggNOG
rs2244608	OASL	CAD	Verweij et al.2017	8638	8090	OASL	Fly	42855	FBgn0039147	CG10694	1	0.9	low	Yes	No	eggNOG
rs2244608	OASL	CAD	Verweij et al.2017	8638	8090	OASL	Fly	31564	FBgn0029856	CG11700	1	0.9	low	Yes	No	eggNOG
rs2244608	OASL	CAD	Verweij et al.2017	8638	8090	OASL	Fly	32977	FBgn0031057	Ubqn	1	0.9	low	Yes	No	eggNOG
rs2244608	OASL	CAD	Verweij et al.2017	8638	8090	OASL	Fly	40947	FBgn0037538	CG3223	1	0.9	low	Yes	No	eggNOG
rs2244608	OASL	CAD	Verweij et al.2017	8638	8090	OASL	Fly	318785	FBgn0051528	CG31528	1	0.9	low	Yes	No	eggNOG
rs2244608	OASL	CAD	Verweij et al.2017	8638	8090	OASL	Fly	3772662	FBgn0038571	CG7215	1	0.9	low	Yes	No	eggNOG
rs2244608	OASL	CAD	Verweij et al.2017	8638	8090	OASL	Fly	43785	FBgn0026777	Rad23	1	0.9	low	Yes	No	eggNOG
rs2244608	OASL	CAD	Verweij et al.2017	8638	8090	OASL	Fly	35151	FBgn0032725	Nedd8	1	0.9	low	Yes	No	eggNOG
rs2244608	OASL	CAD	Verweij et al.2017	8638	8090	OASL	Fly	326237	FBgn0086558	Ubi-p5E	1	0.9	low	Yes	No	eggNOG
rs2244608	OASL	CAD	Verweij et al.2017	8638	8090	OASL	Fly	34420	FBgn0003942	RpS27A	1	0.9	low	Yes	No	eggNOG
rs1867624	PECAM1	CAD	Howson_et_al_2017	5175	8823	PECAM1	Fly	33925	FBgn0031837	DIP-iota	1	0.91	low	Yes	No	Phylome
NA	PLG	CAD	Deloukas_et_al_2012	5340	9071	PLG	Fly	42347	FBgn0038727	CG7432	1	1.05	low	Yes	No	Inparanoid
NA	PLG	CAD	Deloukas_et_al_2012	5340	9071	PLG	Fly	35906	FBgn0033363	CG13744	1	1	low	Yes	No	OrthoInspector
NA	PLG	CAD	Deloukas_et_al_2012	5340	9071	PLG	Fly	39808	FBgn0036612	CG4998	1	0.91	low	Yes	Yes	Phylome
NA	PLG	CAD	Deloukas_et_al_2012	5340	9071	PLG	Fly	38499	FBgn0011653	mas	1	0.91	low	Yes	Yes	Phylome
NA	PLG	CAD	Deloukas_et_al_2012	5340	9071	PLG	Fly	38681	FBgn0035663	CG6462	1	0.91	low	Yes	No	Phylome
NA	PLG	CAD	Deloukas_et_al_2012	5340	9071	PLG	Fly	33484	FBgn0031471	CG3117	1	0.91	low	Yes	No	Phylome
NA	PLG	CAD	Deloukas_et_al_2012	5340	9071	PLG	Fly	41048	FBgn0037627	CG13318	1	0.91	low	Yes	Yes	Phylome
NA	PLG	CAD	Deloukas_et_al_2012	5340	9071	PLG	Fly	35902	FBgn0286782	flz	1	0.91	low	Yes	Yes	Phylome
NA	PLG	CAD	Deloukas_et_al_2012	5340	9071	PLG	Fly	38687	FBgn0035669	CG6592	1	0.91	low	Yes	Yes	Phylome
NA	PLG	CAD	Deloukas_et_al_2012	5340	9071	PLG	Fly	34941	FBgn0028514	CG4793	1	0.91	low	Yes	No	Phylome
NA	PLG	CAD	Deloukas_et_al_2012	5340	9071	PLG	Fly	36445	FBgn0020391	Nrk	1	0.91	low	Yes	No	Phylome
NA	PLG	CAD	Deloukas_et_al_2012	5340	9071	PLG	Fly	33483	FBgn0031470	CG18557	1	0.91	low	Yes	No	Phylome
NA	PDGFD	CAD	Deloukas et al. 2012	80310	30620	PDGFD	Fly	32876	FBgn0030964	Pvf1	1	1.1	low	Yes	No	Panther
rs6700559	DDX59	CAD	Howson_et_al_2017	83479	25360	DDX59	Fly	39979	FBgn0036754	CG5589	1	1.01	low	Yes	No	OrthoDB
rs6700559	DDX59	CAD	Howson_et_al_2017	83479	25360	DDX59	Fly	40739	FBgn0003261	Rm62	1	0.9	low	Yes	No	eggNOG
rs6700559	DDX59	CAD	Howson_et_al_2017	83479	25360	DDX59	Fly	31707	FBgn0029979	mahe	1	0.9	low	Yes	No	eggNOG
rs6700559	DDX59	CAD	Howson_et_al_2017	83479	25360	DDX59	Fly	31595	FBgn0029880	CG14443	1	0.9	low	Yes	No	eggNOG
rs6700559	DDX59	CAD	Howson_et_al_2017	83479	25360	DDX59	Fly	38756	FBgn0035720	CG10077	1	0.9	low	Yes	No	eggNOG
NA	HLA-DRB	CAD	Takeuchi_et_al_2012	3123	4948	HLA-DRB1	Fly	41839	FBgn0045035	tefu	1	1.01	low	Yes	No	OrthoDB
NA	HLA-DRB	CAD	Takeuchi_et_al_2012	3123	4948	HLA-DRB1	Fly	32608	FBgn0004367	mei-41	1	1.01	low	Yes	No	OrthoDB
NA	HLA-DRB	CAD	Takeuchi_et_al_2012	3123	4948	HLA-DRB1	Fly	47396	FBgn0021796	Tor	1	1.01	low	Yes	No	OrthoDB
rs36096196	MORN1	CAD	Van_Der_Harst_and_Verweij_2018	79906	25852	MORN1	Fly	37041	FBgn0034281	CG14490	3	2.84	moderate	Yes	No	Compara, eggNOG, OrthoDB
rs2493298	PLCH2	CAD	Van_Der_Harst_and_Verweij_2018	9651	29037	PLCH2	Fly	31376	FBgn0262738	norpA	2	1.91	moderate	Yes	No	eggNOG, OrthoDB
rs2493298	PLCH2	CAD	Van_Der_Harst_and_Verweij_2018	9651	29037	PLCH2	Fly	33204	FBgn0004611	Plc21C	2	1.83	moderate	Yes	No	Compara, eggNOG
rs2493298	PRDM16	CAD	Van_Der_Harst_and_Verweij_2018	63976	14000	PRDM16	Fly	35135	FBgn0045852	ham	10	9.86	moderate	Yes	No	eggNOG, Inparanoid, OrthoDB, OrthoFinder, OrthoInspector, orthoMCL, Panther, Phylome, RoundUp, TreeFam
rs61776719	MANEAL	CAD	Van_Der_Harst_and_Verweij_2018	149175	26452	MANEAL	Fly	33780	FBgn0031716	CG14015	11	10.76	moderate	Yes	No	Compara, eggNOG, Hieranoid, Inparanoid, OrthoDB, OrthoFinder, OrthoInspector, orthoMCL, Panther, Phylome, TreeFam
rs61776719	FHL3	CAD	Van_Der_Harst_and_Verweij_2018	2275	3704	FHL3	Fly	32656	FBgn0085354	CG34325	2	2.01	moderate	Yes	No	Inparanoid, TreeFam
rs61776719	FHL3	CAD	Van_Der_Harst_and_Verweij_2018	2275	3704	FHL3	Fly	246501	FBgn0050178	CG30178	2	2.01	moderate	Yes	No	Inparanoid, TreeFam
rs61776719	FHL3	CAD	Van_Der_Harst_and_Verweij_2018	2275	3704	FHL3	Fly	35393	FBgn0051624	CG31624	2	2.01	moderate	Yes	No	Inparanoid, TreeFam
rs61776719	FHL3	CAD	Van_Der_Harst_and_Verweij_2018	2275	3704	FHL3	Fly	326182	FBgn0051988	CG31988	2	2.01	moderate	Yes	No	Inparanoid, TreeFam
rs12999907	FIGN	CAD	Van_Der_Harst_and_Verweij_2018	55137	13285	FIGN	Fly	33544	FBgn0031519	Fign	6	5.97	moderate	Yes	No	eggNOG, Inparanoid, OrthoDB, OrthoInspector, Panther, Phylome
rs10512861	NPHP3	CAD	Van_Der_Harst_and_Verweij_2018	27031	7907	NPHP3	Fly	39445	FBgn0010235	Klc	2	1.81	moderate	Yes	No	eggNOG, Phylome
rs667920	PPP2R3A	CAD	Van_Der_Harst_and_Verweij_2018	5523	9307	PPP2R3A	Fly	42368	FBgn0038744	CG4733	8	7.9	moderate	Yes	No	eggNOG, Hieranoid, OrthoFinder, OrthoInspector, Panther, Phylome, RoundUp, TreeFam
rs12897	FNDC3B	CAD	Van_Der_Harst_and_Verweij_2018	64778	24670	FNDC3B	Fly	34987	FBgn0259735	mtgo	9	8.85	moderate	Yes	No	Compara, Hieranoid, Inparanoid, OrthoFinder, OrthoInspector, orthoMCL, Panther, Phylome, TreeFam
rs7633770	ALS2CL	CAD	Van_Der_Harst_and_Verweij_2018	259173	20605	ALS2CL	Fly	40410	FBgn0037116	Als2	9	8.96	moderate	Yes	No	eggNOG, Inparanoid, OrthoDB, OrthoFinder, OrthoInspector, Panther, Phylome, RoundUp, TreeFam
rs7617773	MAP4	CAD	Van_Der_Harst_and_Verweij_2018	4134	6862	MAP4	Fly	326116	FBgn0266579	tau	6	5.86	moderate	Yes	No	eggNOG, Hieranoid, Isobase, OrthoInspector, Panther, Phylome
rs11099493	HNRNPD	CAD	Van_Der_Harst_and_Verweij_2018	3184	5036	HNRNPD	Fly	41666	FBgn0263396	sqd	9	9.04	moderate	Yes	No	Hieranoid, Inparanoid, OMA, OrthoDB, OrthoFinder, OrthoInspector, Panther, Phylome, TreeFam
rs3936511	MIER3	CAD	Van_Der_Harst_and_Verweij_2018	166968	26678	MIER3	Fly	35678	FBgn0033183	CG1620	10	9.89	moderate	Yes	No	Compara, eggNOG, Inparanoid, OrthoDB, OrthoFinder, OrthoInspector, Panther, Phylome, RoundUp, TreeFam
rs17080091	PLEKHG1	CAD	Van_Der_Harst_and_Verweij_2018	57480	20884	PLEKHG1	Fly	37134	FBgn0050115	GEFmeso	7	6.89	moderate	Yes	No	eggNOG, OrthoFinder, OrthoInspector, orthoMCL, Panther, RoundUp, TreeFam
rs1321309	PI16	CAD	Van_Der_Harst_and_Verweij_2018	221476	21245	PI16	Fly	41623	FBgn0038126	CG8483	5	4.97	moderate	Yes	No	eggNOG, OrthoDB, OrthoInspector, Panther, TreeFam
rs6905288	VEGFA	CAD	Van_Der_Harst_and_Verweij_2018	7422	12680	VEGFA	Fly	32876	FBgn0030964	Pvf1	4	3.91	moderate	Yes	No	OrthoDB, Phylome, RoundUp, TreeFam
rs6905288	TMEM63B	CAD	Van_Der_Harst_and_Verweij_2018	55362	17735	TMEM63B	Fly	35779	FBgn0033259	CG11210	12	11.87	moderate	Yes	No	eggNOG, Hieranoid, Inparanoid, OMA, OrthoDB, OrthoFinder, OrthoInspector, orthoMCL, Panther, Phylome, RoundUp, TreeFam
rs4613862	FAM46A	CAD	Van_Der_Harst_and_Verweij_2018	55603	18345	TENT5A	Fly	246653	FBgn0286778	CG46385	8	7.81	moderate	Yes	No	Compara, eggNOG, OMA, OrthoFinder, OrthoInspector, Panther, Phylome, TreeFam
rs975722	CFTR	CAD	Van_Der_Harst_and_Verweij_2018	1080	1884	CFTR	Fly	37428	FBgn0034612	CG10505	5	4.85	moderate	Yes	No	Compara, eggNOG, OrthoDB, Panther, Phylome
rs975722	CFTR	CAD	Van_Der_Harst_and_Verweij_2018	1080	1884	CFTR	Fly	43450	FBgn0039644	rdog	5	4.85	moderate	Yes	No	Compara, eggNOG, OrthoDB, Panther, Phylome
rs975722	CFTR	CAD	Van_Der_Harst_and_Verweij_2018	1080	1884	CFTR	Fly	42362	FBgn0038740	CG4562	5	4.85	moderate	Yes	No	Compara, eggNOG, OrthoDB, Panther, Phylome
rs975722	CFTR	CAD	Van_Der_Harst_and_Verweij_2018	1080	1884	CFTR	Fly	35163	FBgn0051792	CG31792	5	4.85	moderate	Yes	No	Compara, eggNOG, OrthoDB, Panther, Phylome
rs975722	CFTR	CAD	Van_Der_Harst_and_Verweij_2018	1080	1884	CFTR	Fly	35366	FBgn0032908	CG9270	5	4.85	moderate	Yes	No	Compara, eggNOG, OrthoDB, Panther, Phylome
rs975722	CFTR	CAD	Van_Der_Harst_and_Verweij_2018	1080	1884	CFTR	Fly	41387	FBgn0263316	Mrp4	5	4.85	moderate	Yes	No	Compara, eggNOG, OrthoDB, Panther, Phylome
rs975722	CFTR	CAD	Van_Der_Harst_and_Verweij_2018	1080	1884	CFTR	Fly	34148	FBgn0032026	CG7627	5	4.85	moderate	Yes	No	Compara, eggNOG, OrthoDB, Panther, Phylome
rs975722	CFTR	CAD	Van_Der_Harst_and_Verweij_2018	1080	1884	CFTR	Fly	43451	FBgn0039645	CG11898	5	4.85	moderate	Yes	No	Compara, eggNOG, OrthoDB, Panther, Phylome
rs975722	CFTR	CAD	Van_Der_Harst_and_Verweij_2018	1080	1884	CFTR	Fly	47905	FBgn0010549	l(2)03659	5	4.85	moderate	Yes	No	Compara, eggNOG, OrthoDB, Panther, Phylome
rs975722	CTTNBP2	CAD	Van_Der_Harst_and_Verweij_2018	83992	15679	CTTNBP2	Fly	37076	FBgn0034308	CG10915	3	2.87	moderate	Yes	No	OrthoInspector, Phylome, TreeFam
rs2107732	MYO1G	CAD	Van_Der_Harst_and_Verweij_2018	64005	13880	MYO1G	Fly	34445	FBgn0086347	Myo31DF	12	11.77	moderate	Yes	No	Compara, eggNOG, Hieranoid, Inparanoid, OMA, OrthoDB, OrthoFinder, OrthoInspector, orthoMCL, Panther, Phylome, TreeFam
rs7797644	DAGLB	CAD	Van_Der_Harst_and_Verweij_2018	221955	28923	DAGLB	Fly	32343	FBgn0261244	inaE	5	4.84	moderate	Yes	No	eggNOG, OrthoDB, OrthoFinder, orthoMCL, RoundUp
rs10093110	ZFPM2	CAD	Van_Der_Harst_and_Verweij_2018	23414	16700	ZFPM2	Fly	33225	FBgn0003963	ush	5	4.95	moderate	Yes	No	Compara, Inparanoid, Panther, Phylome, TreeFam
rs6984210	DMTN	CAD	Van_Der_Harst_and_Verweij_2018	2039	3382	DMTN	Fly	261629	FBgn0051352	Unc-115a	5	4.8	moderate	Yes	No	Compara, eggNOG, Panther, Phylome, TreeFam
rs944172	KLF4	CAD	Van_Der_Harst_and_Verweij_2018	9314	6348	KLF4	Fly	2768719	FBgn0040765	luna	2	2.03	moderate	Yes	No	Compara, Panther
rs4918072	STN1	CAD	Van_Der_Harst_and_Verweij_2018	79991	26200	STN1	Fly	35364	FBgn0032906	RPA2	2	2	moderate	Yes	No	eggNOG, Panther
rs61848342	NUDT5	CAD	Van_Der_Harst_and_Verweij_2018	11164	8052	NUDT5	Fly	43276	FBgn0261995	CG42813	2	1.81	moderate	Yes	No	eggNOG, Phylome
rs4752700	HTRA1	CAD	Van_Der_Harst_and_Verweij_2018	5654	9476	HTRA1	Fly	41756	FBgn0038233	HtrA2	11	10.81	moderate	Yes	No	eggNOG, Inparanoid, Isobase, OrthoDB, OrthoFinder, OrthoInspector, orthoMCL, Panther, Phylome, RoundUp, TreeFam
rs17680741	MAT1A	CAD	Van_Der_Harst_and_Verweij_2018	4143	6903	MAT1A	Fly	48552	FBgn0005278	Sam-S	12	11.79	moderate	Yes	No	Compara, eggNOG, Hieranoid, Inparanoid, OMA, OrthoFinder, OrthoInspector, orthoMCL, Panther, Phylome, RoundUp, TreeFam
rs17680741	TSPAN14	CAD	Van_Der_Harst_and_Verweij_2018	81619	23303	TSPAN14	Fly	33838	FBgn0031760	Tsp26A	8	7.94	moderate	Yes	No	Hieranoid, Inparanoid, OMA, OrthoDB, OrthoFinder, OrthoInspector, Phylome, TreeFam
rs7947761	ARHGAP42	CAD	Van_Der_Harst_and_Verweij_2018	143872	26545	ARHGAP42	Fly	32522	FBgn0030685	Graf	12	11.79	moderate	Yes	No	Compara, eggNOG, Hieranoid, Inparanoid, OrthoDB, OrthoFinder, OrthoInspector, orthoMCL, Panther, Phylome, RoundUp, TreeFam
rs7306455	FGD6	CAD	Van_Der_Harst_and_Verweij_2018	55785	21740	FGD6	Fly	38806	FBgn0035761	RhoGEF4	2	2.06	moderate	Yes	No	Panther, TreeFam
rs9591012	N4BP2L2	CAD	Van_Der_Harst_and_Verweij_2018	10443	26916	N4BP2L2	Fly	40448	FBgn0027532	CG7139	5	4.94	moderate	Yes	No	eggNOG, OrthoDB, OrthoFinder, OrthoInspector, RoundUp
rs112635299	SERPINA2	CAD	Van_Der_Harst_and_Verweij_2018	390502	8985	SERPINA2	Fly	34091	FBgn0031973	Spn28Dc	2	2.11	moderate	Yes	No	OrthoDB, Panther
rs112635299	SERPINA2	CAD	Van_Der_Harst_and_Verweij_2018	390502	8985	SERPINA2	Fly	35599	FBgn0033112	Spn42Db	2	2.05	moderate	Yes	No	Isobase, Panther
rs112635299	SERPINA2	CAD	Van_Der_Harst_and_Verweij_2018	390502	8985	SERPINA2	Fly	45908	FBgn0002930	nec	2	2.05	moderate	Yes	No	Isobase, Panther
rs112635299	SERPINA2	CAD	Van_Der_Harst_and_Verweij_2018	390502	8985	SERPINA2	Fly	49807	FBgn0028987	Spn28F	2	2.01	moderate	Yes	No	Panther, Phylome
rs112635299	SERPINA2	CAD	Van_Der_Harst_and_Verweij_2018	390502	8985	SERPINA2	Fly	49803	FBgn0028983	Spn55B	2	2.01	moderate	Yes	No	Panther, Phylome
rs112635299	SERPINA2	CAD	Van_Der_Harst_and_Verweij_2018	390502	8985	SERPINA2	Fly	35602	FBgn0033115	Spn42De	2	2.01	moderate	Yes	No	Panther, Phylome
rs112635299	SERPINA2	CAD	Van_Der_Harst_and_Verweij_2018	390502	8985	SERPINA2	Fly	34035	FBgn0083141	Spn28B	2	2.01	moderate	Yes	No	Panther, Phylome
rs112635299	SERPINA1	CAD	Van_Der_Harst_and_Verweij_2018	5265	8941	SERPINA1	Fly	34091	FBgn0031973	Spn28Dc	2	2.11	moderate	Yes	No	OrthoDB, Panther
rs112635299	SERPINA1	CAD	Van_Der_Harst_and_Verweij_2018	5265	8941	SERPINA1	Fly	45908	FBgn0002930	nec	2	2.05	moderate	Yes	No	Isobase, Panther
rs112635299	SERPINA1	CAD	Van_Der_Harst_and_Verweij_2018	5265	8941	SERPINA1	Fly	35599	FBgn0033112	Spn42Db	2	2.05	moderate	Yes	No	Isobase, Panther
rs112635299	SERPINA1	CAD	Van_Der_Harst_and_Verweij_2018	5265	8941	SERPINA1	Fly	35602	FBgn0033115	Spn42De	2	2.01	moderate	Yes	No	Panther, Phylome
rs7199941	PLCG2	CAD	Van_Der_Harst_and_Verweij_2018	5336	9066	PLCG2	Fly	32601	FBgn0003416	sl	10	9.83	moderate	Yes	No	eggNOG, Hieranoid, Inparanoid, OMA, OrthoFinder, OrthoInspector, orthoMCL, Panther, Phylome, TreeFam
rs13723	GIT1	CAD	Van_Der_Harst_and_Verweij_2018	28964	4272	GIT1	Fly	36122	FBgn0033539	Git	11	10.86	moderate	Yes	No	eggNOG, Hieranoid, Inparanoid, OrthoDB, OrthoFinder, OrthoInspector, orthoMCL, Panther, Phylome, RoundUp, TreeFam
rs13723	ANKRD13B	CAD	Van_Der_Harst_and_Verweij_2018	124930	26363	ANKRD13B	Fly	37199	FBgn0034418	CG15118	12	11.77	moderate	Yes	No	Compara, eggNOG, Hieranoid, Inparanoid, OMA, OrthoDB, OrthoFinder, OrthoInspector, orthoMCL, Panther, Phylome, TreeFam
rs13723	CORO6	CAD	Van_Der_Harst_and_Verweij_2018	84940	21356	CORO6	Fly	35596	FBgn0265935	coro	14	13.75	moderate	Yes	No	Compara, eggNOG, Hieranoid, Inparanoid, Isobase, OMA, OrthoDB, OrthoFinder, OrthoInspector, orthoMCL, Panther, Phylome, RoundUp, TreeFam
rs2074158	NKIRAS2	CAD	Van_Der_Harst_and_Verweij_2018	28511	17898	NKIRAS2	Fly	35667	FBgn0040513	kappaB-Ras	9	8.93	moderate	Yes	No	eggNOG, Hieranoid, Inparanoid, OMA, OrthoFinder, OrthoInspector, Panther, Phylome, TreeFam
rs2074158	DHX58	CAD	Van_Der_Harst_and_Verweij_2018	79132	29517	DHX58	Fly	42693	FBgn0039016	Dcr-1	2	2.04	moderate	Yes	No	OrthoDB, RoundUp
rs2074158	DHX58	CAD	Van_Der_Harst_and_Verweij_2018	79132	29517	DHX58	Fly	42543	FBgn0038889	Fancm	2	1.93	moderate	Yes	No	eggNOG, RoundUp
rs2074158	KCNH4	CAD	Van_Der_Harst_and_Verweij_2018	23415	6253	KCNH4	Fly	37047	FBgn0011589	Elk	10	9.85	moderate	Yes	No	Compara, eggNOG, Hieranoid, Inparanoid, OrthoDB, OrthoFinder, OrthoInspector, orthoMCL, Panther, TreeFam
rs9964304	RPL17	CAD	Van_Der_Harst_and_Verweij_2018	6139	10307	RPL17	Fly	31613	FBgn0029897	RpL17	8	7.81	moderate	Yes	No	Compara, eggNOG, OMA, OrthoDB, OrthoFinder, orthoMCL, Panther, TreeFam
rs73015714	COLGALT1	CAD	Van_Der_Harst_and_Verweij_2018	79709	26182	COLGALT1	Fly	319025	FBgn0051915	CG31915	12	11.87	moderate	Yes	No	eggNOG, Hieranoid, Inparanoid, OMA, OrthoDB, OrthoFinder, OrthoInspector, orthoMCL, Panther, Phylome, RoundUp, TreeFam
rs73015714	MAP1S	CAD	Van_Der_Harst_and_Verweij_2018	55201	15715	MAP1S	Fly	5740544	FBgn0259108	futsch	6	5.99	moderate	Yes	No	eggNOG, OrthoFinder, OrthoInspector, Panther, RoundUp, TreeFam
rs3827066	ZNF335	CAD	Van_Der_Harst_and_Verweij_2018	63925	15807	ZNF335	Fly	34701	FBgn0262160	CG9932	2	2.03	moderate	Yes	No	Compara, Panther
rs3827066	ZNF335	CAD	Van_Der_Harst_and_Verweij_2018	63925	15807	ZNF335	Fly	34706	FBgn0032473	kmg	2	2.03	moderate	Yes	No	Compara, Panther
NA	ABCG8	CAD	Deloukas_et_al_2012	64241	13887	ABCG8	Fly	31271	FBgn0003996	w	4	3.74	moderate	Yes	No	Compara, eggNOG, OrthoDB, orthoMCL
NA	VAMP5	CAD	Deloukas_et_al_2012	10791	12646	VAMP5	Fly	36080	FBgn0003660	Syb	3	2.83	moderate	Yes	No	Compara, eggNOG, OrthoFinder
NA	MRAS	CAD	Erdmann__et_al_2009	22808	7227	MRAS	Fly	38494	FBgn0003206	Ras64B	2	2.01	moderate	Yes	No	OrthoDB, OrthoFinder
NA	MRAS	CAD	Erdmann__et_al_2009	22808	7227	MRAS	Fly	41140	FBgn0003205	Ras85D	2	2.01	moderate	Yes	No	OrthoDB, OrthoFinder
NA	GUCY1A3	CAD	Deloukas_et_al_2012	2982	4685	GUCY1A1	Fly	43493	FBgn0013972	Gycalpha99B	11	10.71	moderate	Yes	No	Compara, eggNOG, Hieranoid, Inparanoid, Isobase, OrthoDB, OrthoInspector, orthoMCL, Panther, Phylome, TreeFam
NA	KCNK5	CAD	Deloukas_et_al_2012	8645	6280	KCNK5	Fly	32020	FBgn0017561	Ork1	5	4.7	moderate	Yes	No	Compara, eggNOG, OrthoInspector, Phylome, TreeFam
NA	C6orf105	CAD	Wang_et_al_2011	84830	21214	ADTRP	Fly	39277	FBgn0036158	CG6149	9	8.71	moderate	Yes	No	Compara, eggNOG, Hieranoid, OrthoDB, OrthoFinder, orthoMCL, Panther, Phylome, TreeFam
NA	HDAC9	CAD	Deloukas_et_al_2012	9734	14065	HDAC9	Fly	32278	FBgn0041210	HDAC4	9	8.96	moderate	Yes	No	Compara, eggNOG, Hieranoid, Inparanoid, OMA, OrthoDB, OrthoInspector, Panther, TreeFam
NA	ATP2B1	CAD	Lu_et_al_2012	490	814	ATP2B1	Fly	43787	FBgn0259214	PMCA	12	11.87	moderate	Yes	No	eggNOG, Hieranoid, Inparanoid, OMA, OrthoDB, OrthoFinder, OrthoInspector, orthoMCL, Panther, Phylome, RoundUp, TreeFam
rs433903	SGEF	CAD	Verweij et al.2017	26084	24490	ARHGEF26	Fly	39900	FBgn0261547	Exn	3	3	moderate	Yes	No	eggNOG, OrthoInspector, Panther
rs35541991	HDGFL1	CAD	Verweij et al.2017	154150	21095	HDGFL1	Fly	43576	FBgn0039743	CG7946	7	6.88	moderate	Yes	No	eggNOG, OrthoDB, OrthoFinder, OrthoInspector, Panther, Phylome, TreeFam
rs142695226	ITGB5	CAD	Verweij et al.2017	3693	6160	ITGB5	Fly	44885	FBgn0004657	mys	5	4.91	moderate	Yes	No	eggNOG, OrthoDB, OrthoInspector, orthoMCL, Panther
rs10857147	FGF5	CAD	Verweij et al.2017	2250	3683	FGF5	Fly	42356	FBgn0014135	bnl	5	4.89	moderate	Yes	No	Compara, eggNOG, OrthoInspector, Panther, TreeFam
rs3832966	ZC2HC1C	CAD	Verweij et al.2017	79696	20354	ZC2HC1C	Fly	40722	FBgn0261561	CG42675	2	1.86	moderate	Yes	No	eggNOG, TreeFam
rs3832966	NEK9	CAD	Verweij et al.2017	91754	18591	NEK9	Fly	42959	FBgn0045980	niki	9	8.77	moderate	Yes	No	Compara, eggNOG, Hieranoid, Inparanoid, OMA, OrthoDB, OrthoInspector, Phylome, TreeFam
rs2820315	LMOD1	CAD	Howson_et_al_2017	25802	6647	LMOD1	Fly	43633	FBgn0082582	tmod	6	5.81	moderate	Yes	No	Compara, eggNOG, OrthoDB, Panther, Phylome, TreeFam
rs2571445	TNS1	CAD	Howson_et_al_2017	7145	11973	TNS1	Fly	41144	FBgn0000244	by	7	6.8	moderate	Yes	No	eggNOG, OrthoInspector, orthoMCL, Panther, Phylome, RoundUp, TreeFam
rs590121	SERPINH1	CAD	Howson_et_al_2017	871	1546	SERPINH1	Fly	35600	FBgn0033113	Spn42Dc	2	1.92	moderate	Yes	No	OrthoDB, Phylome
rs11057830	SCARB1	CAD	Howson_et_al_2017	949	1664	SCARB1	Fly	37999	FBgn0010435	emp	8	7.89	moderate	Yes	No	Compara, eggNOG, Hieranoid, Inparanoid, OrthoDB, OrthoInspector, orthoMCL, Panther
rs6494488	RBPMS2	CAD	Howson_et_al_2017	348093	19098	RBPMS2	Fly	45840	FBgn0263995	cpo	8	7.8	moderate	Yes	No	eggNOG, OrthoFinder, OrthoInspector, orthoMCL, Panther, Phylome, RoundUp, TreeFam
NA	PPAP2B	CAD	Schunkert_et_al_2011	8613	9229	PLPP3	Fly	35966	FBgn0016078	wun	12	11.79	moderate	Yes	No	Compara, eggNOG, Hieranoid, Inparanoid, OMA, OrthoFinder, OrthoInspector, orthoMCL, Panther, Phylome, RoundUp, TreeFam
NA	PCSK9	CAD	Schunkert_et_al_2011	255738	20001	PCSK9	Fly	32604	FBgn0004598	Fur2	2	1.83	moderate	Yes	No	Compara, eggNOG
NA	MIA3	CAD	Schunkert_et_al_2011	375056	24008	MIA3	Fly	33930	FBgn0031842	Tango1	7	6.98	moderate	Yes	No	Compara, Hieranoid, Inparanoid, Panther, Phylome, RoundUp, TreeFam
NA	VAMP8	CAD	Deloukas_et_al_2012	8673	12647	VAMP8	Fly	36080	FBgn0003660	Syb	5	4.93	moderate	Yes	No	eggNOG, OrthoFinder, orthoMCL, Panther, RoundUp
NA	BCAP29	CAD	Peden_et_al_2011	55973	24131	BCAP29	Fly	38096	FBgn0035165	CG13887	11	10.76	moderate	Yes	No	Compara, eggNOG, Hieranoid, Inparanoid, OrthoDB, OrthoFinder, OrthoInspector, orthoMCL, Panther, Phylome, TreeFam
NA	TRIB1	CAD	Deloukas_et_al_2012	10221	16891	TRIB1	Fly	43999	FBgn0028978	trbl	10	9.86	moderate	Yes	No	Compara, eggNOG, Hieranoid, Inparanoid, OrthoDB, OrthoFinder, OrthoInspector, Panther, Phylome, TreeFam
NA	SH2B3	CAD	Deloukas_et_al_2012	10019	29605	SH2B3	Fly	43130	FBgn0028717	Lnk	7	6.94	moderate	Yes	No	Compara, Hieranoid, OrthoDB, Panther, Phylome, RoundUp, TreeFam
NA	UBE2Z	CAD	Schunkert_et_al_2011	65264	25847	UBE2Z	Fly	41260	FBgn0266717	Bruce	2	1.91	moderate	Yes	No	eggNOG, OrthoDB
NA	UBE2Z	CAD	Schunkert_et_al_2011	65264	25847	UBE2Z	Fly	34849	FBgn0028913	CG3473	2	1.85	moderate	Yes	No	eggNOG, Isobase
NA	LDLR	CAD	Deloukas_et_al_2012	3949	6547	LDLR	Fly	43105	FBgn0051092	LpR2	11	10.91	moderate	Yes	No	eggNOG, Hieranoid, Inparanoid, OMA, OrthoDB, OrthoFinder, OrthoInspector, orthoMCL, Panther, Phylome, RoundUp
rs11806316	NGF	CAD	Van_Der_Harst_and_Verweij_2018	4803	7808	NGF	NA	NA	NA	NA	0	0.0	None	NA	NA	NA
rs11806316	CASQ2	CAD	Van_Der_Harst_and_Verweij_2018	845	1513	CASQ2	NA	NA	NA	NA	0	0.0	None	NA	NA	NA
rs582384	TMEM247	CAD	Van_Der_Harst_and_Verweij_2018	388946	42967	TMEM247	NA	NA	NA	NA	0	0.0	None	NA	NA	NA
rs10512861	ACAD11	CAD	Van_Der_Harst_and_Verweij_2018	84129	30211	ACAD11	NA	NA	NA	NA	0	0.0	None	NA	NA	NA
rs7633770	RTP3	CAD	Van_Der_Harst_and_Verweij_2018	83597	15572	RTP3	NA	NA	NA	NA	0	0.0	None	NA	NA	NA
rs12500824	FAM47E	CAD	Van_Der_Harst_and_Verweij_2018	100129583	34343	FAM47E	NA	NA	NA	NA	0	0.0	None	NA	NA	NA
rs12500824	STBD1	CAD	Van_Der_Harst_and_Verweij_2018	8987	24854	STBD1	NA	NA	NA	NA	0	0.0	None	NA	NA	NA
rs3936511	MAP3K1	CAD	Van_Der_Harst_and_Verweij_2018	4214	6848	MAP3K1	NA	NA	NA	NA	0	0.0	None	NA	NA	NA
rs1508798	TAS2R1	CAD	Van_Der_Harst_and_Verweij_2018	50834	14909	TAS2R1	NA	NA	NA	NA	0	0.0	None	NA	NA	NA
rs1591805	CENPW	CAD	Van_Der_Harst_and_Verweij_2018	387103	21488	CENPW	NA	NA	NA	NA	0	0.0	None	NA	NA	NA
rs9367716	BEND6	CAD	Van_Der_Harst_and_Verweij_2018	221336	20871	BEND6	NA	NA	NA	NA	0	0.0	None	NA	NA	NA
rs11509880	TMEM106B	CAD	Van_Der_Harst_and_Verweij_2018	54664	22407	TMEM106B	NA	NA	NA	NA	0	0.0	None	NA	NA	NA
rs2107732	CCM2	CAD	Van_Der_Harst_and_Verweij_2018	83605	21708	CCM2	NA	NA	NA	NA	0	0.0	None	NA	NA	NA
rs7797644	FAM220A	CAD	Van_Der_Harst_and_Verweij_2018	84792	22422	FAM220A	NA	NA	NA	NA	0	0.0	None	NA	NA	NA
rs6997340	NAT2	CAD	Van_Der_Harst_and_Verweij_2018	10	7646	NAT2	NA	NA	NA	NA	0	0.0	None	NA	NA	NA
rs6984210	SFTPC	CAD	Van_Der_Harst_and_Verweij_2018	6440	10802	SFTPC	NA	NA	NA	NA	0	0.0	None	NA	NA	NA
rs6984210	PHYHIP	CAD	Van_Der_Harst_and_Verweij_2018	9796	16865	PHYHIP	NA	NA	NA	NA	0	0.0	None	NA	NA	NA
rs61848342	CDC123	CAD	Van_Der_Harst_and_Verweij_2018	8872	16827	CDC123	NA	NA	NA	NA	0	0.0	None	NA	NA	NA
rs4752700	PLEKHA1	CAD	Van_Der_Harst_and_Verweij_2018	59338	14335	PLEKHA1	NA	NA	NA	NA	0	0.0	None	NA	NA	NA
rs17680741	FAM213A	CAD	Van_Der_Harst_and_Verweij_2018	84293	28651	PRXL2A	NA	NA	NA	NA	0	0.0	None	NA	NA	NA
rs11601507	OR52B6	CAD	Van_Der_Harst_and_Verweij_2018	340980	15211	OR52B6	NA	NA	NA	NA	0	0.0	None	NA	NA	NA
rs11601507	TRIM6	CAD	Van_Der_Harst_and_Verweij_2018	117854	16277	TRIM6	NA	NA	NA	NA	0	0.0	None	NA	NA	NA
rs11601507	OR52N1	CAD	Van_Der_Harst_and_Verweij_2018	79473	14853	OR52N1	NA	NA	NA	NA	0	0.0	None	NA	NA	NA
rs7199941	CENPN	CAD	Van_Der_Harst_and_Verweij_2018	55839	30873	CENPN	NA	NA	NA	NA	0	0.0	None	NA	NA	NA
rs76954792	COPRS	CAD	Van_Der_Harst_and_Verweij_2018	55352	28848	COPRS	NA	NA	NA	NA	0	0.0	None	NA	NA	NA
rs2074158	HCRT	CAD	Van_Der_Harst_and_Verweij_2018	3060	4847	HCRT	NA	NA	NA	NA	0	0.0	None	NA	NA	NA
rs2074158	GHDC	CAD	Van_Der_Harst_and_Verweij_2018	84514	24438	GHDC	NA	NA	NA	NA	0	0.0	None	NA	NA	NA
rs6102343	ZHX3	CAD	Van_Der_Harst_and_Verweij_2018	23051	15935	ZHX3	NA	NA	NA	NA	0	0.0	None	NA	NA	NA
rs3827066	PLTP	CAD	Van_Der_Harst_and_Verweij_2018	5360	9093	PLTP	NA	NA	NA	NA	0	0.0	None	NA	NA	NA
rs2832227	MAP3K7CL	CAD	Van_Der_Harst_and_Verweij_2018	56911	16457	MAP3K7CL	NA	NA	NA	NA	0	0.0	None	NA	NA	NA
NA	HLA-C	CAD	Davies_et_al_2012	3107	4933	HLA-C	NA	NA	NA	NA	0	0.0	None	NA	NA	NA
NA	C6orf10	CAD	Lu_et_al_2012	10665	13922	TSBP1	NA	NA	NA	NA	0	0.0	None	NA	NA	NA
NA	KIAA1462	CAD	Deloukas_et_al_2012	57608	29283	JCAD	NA	NA	NA	NA	0	0.0	None	NA	NA	NA
NA	CXCL12	CAD	Schunkert_et_al_2011	6387	10672	CXCL12	NA	NA	NA	NA	0	0.0	None	NA	NA	NA
NA	APOA5	CAD	Schunkert_et_al_2011	116519	17288	APOA5	NA	NA	NA	NA	0	0.0	None	NA	NA	NA
NA	APOA1	CAD	Schunkert_et_al_2011	335	600	APOA1	NA	NA	NA	NA	0	0.0	None	NA	NA	NA
NA	PEMT	CAD	Schunkert_et_al_2011	10400	8830	PEMT	NA	NA	NA	NA	0	0.0	None	NA	NA	NA
NA	HLA-B	CAD	Davies_et_al_2012	3106	4932	HLA-B	NA	NA	NA	NA	0	0.0	None	NA	NA	NA
rs2244608	HNF1A	CAD	Verweij et al.2017	6927	11621	HNF1A	NA	NA	NA	NA	0	0.0	None	NA	NA	NA
rs2244608	HNF1A	CAD	Verweij et al.2017	6927	11621	HNF1A	NA	NA	NA	NA	0	0.0	None	NA	NA	NA
rs7623687	TCTA	CAD	Verweij et al.2017	6988	11692	TCTA	NA	NA	NA	NA	0	0.0	None	NA	NA	NA
rs10237377	PARP12	CAD	Howson_et_al_2017	64761	21919	PARP12	NA	NA	NA	NA	0	0.0	None	NA	NA	NA
rs2258287	C12orf43	CAD	Howson_et_al_2017	64897	25719	C12orf43	NA	NA	NA	NA	0	0.0	None	NA	NA	NA
rs2258287	HNF1A	CAD	Howson_et_al_2017	6927	11621	HNF1A	NA	NA	NA	NA	0	0.0	None	NA	NA	NA
rs2258287	HNF1A	CAD	Howson_et_al_2017	6927	11621	HNF1A	NA	NA	NA	NA	0	0.0	None	NA	NA	NA
rs867186	PROCR	CAD	Howson_et_al_2017	10544	9452	PROCR	NA	NA	NA	NA	0	0.0	None	NA	NA	NA
NA	SORT1	CAD	Schunkert_et_al_2011	6272	11186	SORT1	NA	NA	NA	NA	0	0.0	None	NA	NA	NA
NA	IL6R	CAD	Deloukas_et_al_2012	3570	6019	IL6R	NA	NA	NA	NA	0	0.0	None	NA	NA	NA
NA	ZC3HC1	CAD	Schunkert_et_al_2011	51530	29913	ZC3HC1	NA	NA	NA	NA	0	0.0	None	NA	NA	NA
NA	CDKN2BAS	CAD	Schunkert_et_al_2011	100048912	34341	CDKN2B-AS1	NA	NA	NA	NA	0	0.0	None	NA	NA	NA
NA	ABO	CAD	Schunkert_et_al_2011	28	79	ABO	NA	NA	NA	NA	0	0.0	None	NA	NA	NA
NA	HHIPL1	CAD	Schunkert_et_al_2011	84439	19710	HHIPL1	NA	NA	NA	NA	0	0.0	None	NA	NA	NA
NA	APOE	CAD	Deloukas_et_al_2012	348	613	APOE	NA	NA	NA	NA	0	0.0	None	NA	NA	NA
NA	SMCR3	CAD	Schunkert_et_al_2011		17915	NA	NA	NA	NA	NA			None	NA	NA	NA
NA	HLA-DRB	CAD	Takeuchi_et_al_2012	3125	4951	HLA-DRB3	NA	NA	NA	NA	0	0.0	None	NA	NA	NA
NA	HLA-DRB	CAD	Takeuchi_et_al_2012	3127	4953	HLA-DRB5	NA	NA	NA	NA	0	0.0	None	NA	NA	NA
NA	HLA-DQB	CAD	Takeuchi_et_al_2012	3119	4944	HLA-DQB1	NA	NA	NA	NA	0	0.0	None	NA	NA	NA

## Sheet: Supplementary File 3h
Human genes found associated to cardiac disorders in GWAS studies.
Human Gene ID , SNP ID (when available), cardiac trait and original article describing the association are indicated.
SNP	Human Symbol	trait	reference			Bibliography
rs18758553 0	UBE4B	atrial_fibrilation	Roseli_et_al_2018			Arking_et_al_2014		PMID: 24952745
rs880315	CASZ1	atrial_fibrilation	Roseli_et_al_2018			Arnett_et_al_2009		PMID: 19454037
rs14651872 6	C1orf185	atrial_fibrilation	Roseli_et_al_2018			Cappola et_al_2010		PMID: 20124441
rs4484922	CASQ2	atrial_fibrilation	Roseli_et_al_2018			Chambers_et_al_2010		PMID: 20062061
rs79187193	GJA5	atrial_fibrilation	Roseli_et_al_2018			den_Hoed_et_al_2013		PMID: 23583979
rs4951261	NUCKS1	atrial_fibrilation	Roseli_et_al_2018			Eppinga_et_al_2016		PMID: 27798624
rs6546620	KIF3C	atrial_fibrilation	Roseli_et_al_2018			Fox et_al_2013		PMID: 23275298
rs6742276	XPO1	atrial_fibrilation	Roseli_et_al_2018			Holm_et_al_2010		PMID: 20062063
rs72926475	REEP1	atrial_fibrilation	Roseli_et_al_2018			Larson_et_al_2007		PMID: 17903304
rs72926475	KDM3A	atrial_fibrilation	Roseli_et_al_2018			Meder_et_al_2014		PMID: 23853074
rs56181519	WIPF1	atrial_fibrilation	Roseli_et_al_2018			Nielsen_et_al_2018		PMID: 30061737
rs56181519	CHRNA1	atrial_fibrilation	Roseli_et_al_2018			Parsa et_al_2011		PMID: 21348951
rs295114	SPATS2L	atrial_fibrilation	Roseli_et_al_2018			Roseli_et_al_2018		PMID: 29892015
rs2306272	LRIG1	atrial_fibrilation	Roseli_et_al_2018			Shah_et_al_2020		PMID: 31919418
rs17490701	PHLDB2	atrial_fibrilation	Roseli_et_al_2018			Smith_et_al_2010		PMID: 20445134
rs4855075	GNB4	atrial_fibrilation	Roseli_et_al_2018			Sotoodehnia_et_al_2010		PMID: 21076409
rs3822259	WDR1	atrial_fibrilation	Roseli_et_al_2018			Stark_et_al_2010		PMID: 20975947
rs3960788	SLC9B1	atrial_fibrilation	Roseli_et_al_2018			Van_den_Berg_et_al_2017		PMID: 28379579
rs55754224	CAMK2D	atrial_fibrilation	Roseli_et_al_2018			van_der_Hast_et_al_2016		PMID: 27659466
rs10213171	ARHGAP10	atrial_fibrilation	Roseli_et_al_2018			van_Setten_et_al_2018		PMID: 30046033
rs174048	ARHGAP26	atrial_fibrilation	Roseli_et_al_2018			Vasan et_al_2009		PMID: 19584346
rs174048	NR3C1	atrial_fibrilation	Roseli_et_al_2018			Verweij_et_al_2020		PMID: 32916098
rs6882776	NKX2-5	atrial_fibrilation	Roseli_et_al_2018			Villard_et_al_2011		PMID: 21459883
rs73366713	ATXN1	atrial_fibrilation	Roseli_et_al_2018			Wild_et_al_2017		PMID: 28394258
rs34969716	KDM1B	atrial_fibrilation	Roseli_et_al_2018
rs3176326	CDKN1A	atrial_fibrilation	Roseli_et_al_2018
rs11798485 3	UST	atrial_fibrilation	Roseli_et_al_2018
rs55734480	DGKB	atrial_fibrilation	Roseli_et_al_2018
rs6462078	CREB5	atrial_fibrilation	Roseli_et_al_2018
rs74910854	GTF2I	atrial_fibrilation	Roseli_et_al_2018
rs62483627	COG5	atrial_fibrilation	Roseli_et_al_2018
rs7789146	KCNH2	atrial_fibrilation	Roseli_et_al_2018
rs7846485	XPO7	atrial_fibrilation	Roseli_et_al_2018
rs62521286	FBXO32	atrial_fibrilation	Roseli_et_al_2018
rs35006907	MTSS1	atrial_fibrilation	Roseli_et_al_2018
rs35006907	LINC00964	atrial_fibrilation	Roseli_et_al_2018
rs6993266	PTK2	atrial_fibrilation	Roseli_et_al_2018
rs4977397	SLC24A2	atrial_fibrilation	Roseli_et_al_2018
rs4977397	MLLT3	atrial_fibrilation	Roseli_et_al_2018
rs4743034	ZNF462	atrial_fibrilation	Roseli_et_al_2018
rs10760361	PSMB7	atrial_fibrilation	Roseli_et_al_2018
rs7919685	REEP3	atrial_fibrilation	Roseli_et_al_2018
rs11001667	C10orf11	atrial_fibrilation	Roseli_et_al_2018
rs1044258	C10orf76	atrial_fibrilation	Roseli_et_al_2018
rs1822273	NAV2	atrial_fibrilation	Roseli_et_al_2018
rs949078	sorli	atrial_fibrilation	Roseli_et_al_2018
rs949078	mirioohG	atrial_fibrilation	Roseli_et_al_2018
rs11381953 7	SSPN	atrial_fibrilation	Roseli_et_al_2018
rs12809354	PKP2	atrial_fibrilation	Roseli_et_al_2018
rs7978685	NACA	atrial_fibrilation	Roseli_et_al_2018
rs35349325	BEST3	atrial_fibrilation	Roseli_et_al_2018
rs11180703	KRR1	atrial_fibrilation	Roseli_et_al_2018
rs11180703	PHLDA1	atrial_fibrilation	Roseli_et_al_2018
rs12810346	TBX5-AS1	atrial_fibrilation	Roseli_et_al_2018
rs12810346	TBX3	atrial_fibrilation	Roseli_et_al_2018
rs12298484	DNAH10	atrial_fibrilation	Roseli_et_al_2018
rs9580438	LINC00540	atrial_fibrilation	Roseli_et_al_2018
rs9580438	BASP1P1	atrial_fibrilation	Roseli_et_al_2018
rs28631169	MYH7	atrial_fibrilation	Roseli_et_al_2018
rs2145587	AKAP6	atrial_fibrilation	Roseli_et_al_2018
rs73241997	SNX6	atrial_fibrilation	Roseli_et_al_2018
rs73241997	CFL2	atrial_fibrilation	Roseli_et_al_2018
rs10873299	LRRC74	atrial_fibrilation	Roseli_et_al_2018
rs10873299	IRF2BPL	atrial_fibrilation	Roseli_et_al_2018
rs62011291	USP3	atrial_fibrilation	Roseli_et_al_2018
rs12591736	TLE3	atrial_fibrilation	Roseli_et_al_2018
rs12591736	UACA	atrial_fibrilation	Roseli_et_al_2018
rs12908004	LINC00927	atrial_fibrilation	Roseli_et_al_2018
rs12908004	ARNT2	atrial_fibrilation	Roseli_et_al_2018
rs12908437	IGF1R	atrial_fibrilation	Roseli_et_al_2018
rs2286466	RPS2	atrial_fibrilation	Roseli_et_al_2018
rs8073937	POLR2A	atrial_fibrilation	Roseli_et_al_2018
rs8073937	TNFSF12	atrial_fibrilation	Roseli_et_al_2018
rs72811294	MYOCD	atrial_fibrilation	Roseli_et_al_2018
rs242557	MAPT	atrial_fibrilation	Roseli_et_al_2018
rs7219869	KCNJ2	atrial_fibrilation	Roseli_et_al_2018
rs7219869	CASC17	atrial_fibrilation	Roseli_et_al_2018
rs9953366	SMAD7	atrial_fibrilation	Roseli_et_al_2018
rs2145274	CASC20	atrial_fibrilation	Roseli_et_al_2018
rs2145274	BMP2	atrial_fibrilation	Roseli_et_al_2018
rs7269123	C20orf166	atrial_fibrilation	Roseli_et_al_2018
rs2834618	LOC100506385	atrial_fibrilation	Roseli_et_al_2018
rs465276	TUBA8	atrial_fibrilation	Roseli_et_al_2018
rs12044963	KCND3	atrial_fibrilation	Roseli_et_al_2018
rs11264280	KCNN3	atrial_fibrilation	Roseli_et_al_2018
rs11264280	PMVK	atrial_fibrilation	Roseli_et_al_2018
rs72700114	METTL11B	atrial_fibrilation	Roseli_et_al_2018
rs72700114	LINC01142	atrial_fibrilation	Roseli_et_al_2018
rs608930	GORAB	atrial_fibrilation	Roseli_et_al_2018
rs608930	PRRX1	atrial_fibrilation	Roseli_et_al_2018
rs10753933	PPFIA4	atrial_fibrilation	Roseli_et_al_2018
rs2540949	CEP68	atrial_fibrilation	Roseli_et_al_2018
rs10165883	SNRNP27	atrial_fibrilation	Roseli_et_al_2018
rs35504893	TTN	atrial_fibrilation	Roseli_et_al_2018
rs6810325	CAND2	atrial_fibrilation	Roseli_et_al_2018
rs6790396	SCN10A	atrial_fibrilation	Roseli_et_al_2018
rs2129977	PITX2	atrial_fibrilation	Roseli_et_al_2018
rs2129977	C4orf32	atrial_fibrilation	Roseli_et_al_2018
rs10520260	HAND2	atrial_fibrilation	Roseli_et_al_2018
rs716845	KCNN2	atrial_fibrilation	Roseli_et_al_2018
rs34750263	WNT8A	atrial_fibrilation	Roseli_et_al_2018
rs34750263	NME5	atrial_fibrilation	Roseli_et_al_2018
rs17079881	SLC35F1	atrial_fibrilation	Roseli_et_al_2018
rs13191450	GJA1	atrial_fibrilation	Roseli_et_al_2018
rs13191450	HSF2	atrial_fibrilation	Roseli_et_al_2018
rs11773845	CAV1	atrial_fibrilation	Roseli_et_al_2018
rs7508	ASAH1	atrial_fibrilation	Roseli_et_al_2018
rs4385527	C9orf3	atrial_fibrilation	Roseli_et_al_2018
rs60212594	SYNPO2L	atrial_fibrilation	Roseli_et_al_2018
rs11598047	NEURL	atrial_fibrilation	Roseli_et_al_2018
rs76097649	KCNJ5	atrial_fibrilation	Roseli_et_al_2018
rs10842383	LINC00477	atrial_fibrilation	Roseli_et_al_2018
rs10842383	BCAT1	atrial_fibrilation	Roseli_et_al_2018
rs883079	TBX5	atrial_fibrilation	Roseli_et_al_2018
rs2738413	SYNE2	atrial_fibrilation	Roseli_et_al_2018
rs74022964	HCN4	atrial_fibrilation	Roseli_et_al_2018
rs74022964	REC114	atrial_fibrilation	Roseli_et_al_2018
rs2359171	ZFHX3	atrial_fibrilation	Roseli_et_al_2018
rs4430933	MEIS1	atrioventricular_electrical_activity	van_Setten_et_al_2018
rs6599250	SCN10A	atrioventricular_electrical_activity	van_Setten_et_al_2018
rs11708996	SCN5A	atrioventricular_electrical_activity	van_Setten_et_al_2018
rs343849	ARHGAP24	atrioventricular_electrical_activity	van_Setten_et_al_2018
rs255292	BNIP1	atrioventricular_electrical_activity	van_Setten_et_al_2018
rs255292	NKX2-5	atrioventricular_electrical_activity	van_Setten_et_al_2018
rs3807989	CAV1	atrioventricular_electrical_activity	van_Setten_et_al_2018
rs3807989	CAV2	atrioventricular_electrical_activity	van_Setten_et_al_2018
rs652673	WNT11	atrioventricular_electrical_activity	van_Setten_et_al_2018
rs17287293	C12orf67	atrioventricular_electrical_activity	van_Setten_et_al_2018
rs17287293	SOX5	atrioventricular_electrical_activity	van_Setten_et_al_2018
rs1896312	TBX3	atrioventricular_electrical_activity	van_Setten_et_al_2018
rs6489953	TBX5	atrioventricular_electrical_activity	van_Setten_et_al_2018
rs4648819	SKI	atrioventricular_electrical_activity	van_Setten_et_al_2018
rs7538988	EPS15	atrioventricular_electrical_activity	van_Setten_et_al_2018
rs12127701	MYBPHL	atrioventricular_electrical_activity	van_Setten_et_al_2018
rs11264339	KRTCAP2	atrioventricular_electrical_activity	van_Setten_et_al_2018
rs397637	OBSCN	atrioventricular_electrical_activity	van_Setten_et_al_2018
rs3856447	ID2	atrioventricular_electrical_activity	van_Setten_et_al_2018
rs2732860	TMEM182	atrioventricular_electrical_activity	van_Setten_et_al_2018
rs13018106	FIGN	atrioventricular_electrical_activity	van_Setten_et_al_2018
rs922984	TTN	atrioventricular_electrical_activity	van_Setten_et_al_2018
rs9826413	EOMES	atrioventricular_electrical_activity	van_Setten_et_al_2018
rs900669	FRMD4B	atrioventricular_electrical_activity	van_Setten_et_al_2018
rs13087058	PDZRN3	atrioventricular_electrical_activity	van_Setten_et_al_2018
rs16858828	PHLDB2	atrioventricular_electrical_activity	van_Setten_et_al_2018
rs6441111	CCNL1	atrioventricular_electrical_activity	van_Setten_et_al_2018
rs7638853	SENP2	atrioventricular_electrical_activity	van_Setten_et_al_2018
rs17446418	CAMK2D	atrioventricular_electrical_activity	van_Setten_et_al_2018
rs3733409	FAT1	atrioventricular_electrical_activity	van_Setten_et_al_2018
rs7729395	PAM	atrioventricular_electrical_activity	van_Setten_et_al_2018
rs11763856	TBX20	atrioventricular_electrical_activity	van_Setten_et_al_2018
rs11763856	HERPUD2	atrioventricular_electrical_activity	van_Setten_et_al_2018
rs2129561	MKLN1	atrioventricular_electrical_activity	van_Setten_et_al_2018
rs881301	FGFR1	atrioventricular_electrical_activity	van_Setten_et_al_2018
rs12678719	ZFPM2	atrioventricular_electrical_activity	van_Setten_et_al_2018
rs12359272	ALDH18A1	atrioventricular_electrical_activity	van_Setten_et_al_2018
rs12359272	SORBS1	atrioventricular_electrical_activity	van_Setten_et_al_2018
rs12257568	SH3PXD2A	atrioventricular_electrical_activity	van_Setten_et_al_2018
rs12257568	OBFC1	atrioventricular_electrical_activity	van_Setten_et_al_2018
rs1372797	NAV2	atrioventricular_electrical_activity	van_Setten_et_al_2018
rs11067773	MED13L	atrioventricular_electrical_activity	van_Setten_et_al_2018
rs718426	EFHA1	atrioventricular_electrical_activity	van_Setten_et_al_2018
rs2585897	XPO4	atrioventricular_electrical_activity	van_Setten_et_al_2018
rs9590974	LRCH1	atrioventricular_electrical_activity	van_Setten_et_al_2018
rs11465506	IL25	atrioventricular_electrical_activity	van_Setten_et_al_2018
rs11465506	MYH6	atrioventricular_electrical_activity	van_Setten_et_al_2018
rs4901308	FERMT2	atrioventricular_electrical_activity	van_Setten_et_al_2018
rs17767398	SNORD56B	atrioventricular_electrical_activity	van_Setten_et_al_2018
rs17767398	SIPA1L1	atrioventricular_electrical_activity	van_Setten_et_al_2018
rs904974	TLE3	atrioventricular_electrical_activity	van_Setten_et_al_2018
rs1984481	MYOCD	atrioventricular_electrical_activity	van_Setten_et_al_2018
rs846111	RNF207	myocardial_repolarization	Arking_et_al_2014
rs12143842	NOS1AP	myocardial_repolarization	Arking_et_al_2014
rs10919070	ATP1B1	myocardial_repolarization	Arking_et_al_2014
rs12997023	SLC8A1	myocardial_repolarization	Arking_et_al_2014
rs6793245	SCN5A	myocardial_repolarization	Arking_et_al_2014
rs6793245	SCN10A	myocardial_repolarization	Arking_et_al_2014
rs11153730	SLC35F1	myocardial_repolarization	Arking_et_al_2014
rs11153730	PLN	myocardial_repolarization	Arking_et_al_2014
rs2072413	KCNH2	myocardial_repolarization	Arking_et_al_2014
rs7122937	KCNQ1	myocardial_repolarization	Arking_et_al_2014
rs735951	LITAF	myocardial_repolarization	Arking_et_al_2014
rs246196	CNOT1	myocardial_repolarization	Arking_et_al_2014
rs1052536	LIG3	myocardial_repolarization	Arking_et_al_2014
rs1396515	KCNJ2	myocardial_repolarization	Arking_et_al_2014
rs1805128	KCNE1	myocardial_repolarization	Arking_et_al_2014
rs2298632	TCEA3	myocardial_repolarization	Arking_et_al_2014
rs938291	SP3	myocardial_repolarization	Arking_et_al_2014
rs7561149	TTN	myocardial_repolarization	Arking_et_al_2014
rs7561149	CCDC141	myocardial_repolarization	Arking_et_al_2014
rs295140	SPATS2L	myocardial_repolarization	Arking_et_al_2014
rs17784882	C3ORF75	myocardial_repolarization	Arking_et_al_2014
rs2363719	SLC4A4	myocardial_repolarization	Arking_et_al_2014
rs3857067	SMARCAD1	myocardial_repolarization	Arking_et_al_2014
rs10040989	GFRA3	myocardial_repolarization	Arking_et_al_2014
rs7765828	GMPR	myocardial_repolarization	Arking_et_al_2014
rs9920	CAV1	myocardial_repolarization	Arking_et_al_2014
rs16936870	NCOA2	myocardial_repolarization	Arking_et_al_2014
rs11779860	LAPTM4B	myocardial_repolarization	Arking_et_al_2014
rs1961102	AZIN1	myocardial_repolarization	Arking_et_al_2014
rs2485376	GBF1	myocardial_repolarization	Arking_et_al_2014
rs174583	FEN1	myocardial_repolarization	Arking_et_al_2014
rs174583	FADS2	myocardial_repolarization	Arking_et_al_2014
rs3026445	ATP2A2	myocardial_repolarization	Arking_et_al_2014
rs728926	KLF12	myocardial_repolarization	Arking_et_al_2014
rs2273905	ANKRD9	myocardial_repolarization	Arking_et_al_2014
rs3105593	USP50	myocardial_repolarization	Arking_et_al_2014
rs3105593	TRPM7	myocardial_repolarization	Arking_et_al_2014
rs1296720	CREBBP	myocardial_repolarization	Arking_et_al_2014
rs246185	MKL2	myocardial_repolarization	Arking_et_al_2014
rs9892651	PRKCA	myocardial_repolarization	Arking_et_al_2014
rs10519210	USP3	HF	Smith_et_al_2010
rs2234962	BAG3	HF	Villard_et_al_2011
rs9262636	HGC22	HF	Meder_et_al_2014
rs89107	SLC35F1	HF	Vasan et_al_2009
rs11153768	PLN	HF	Vasan et_al_2009
rs10852932	SMG6	HF	Vasan et_al_2009
rs4523957	SRR	HF	Vasan et_al_2009
rs17470137	CCDC100	HF	Vasan et_al_2009
rs4026608	HMGA2	HF	Vasan et_al_2009
rs10770612	PDE3A	HF	Vasan et_al_2009
rs1571099	PPAPDC1A	HF	Fox et_al_2013
rs1320448	COL17A1	HF	Parsa et_al_2011
rs1739843	HSPB7	HF	Cappola et_al_2010
rs6787362	FRMD4B	HF	Cappola et_al_2010
rs660240	CELSR2	HF	Shah_et_al_2020
rs17042102	PITX2	HF	Shah_et_al_2020
rs17042102	FAM241A	HF	Shah_et_al_2020
rs11745324	KLHL3	HF	Shah_et_al_2020
rs4135240	CDKN1A	HF	Shah_et_al_2020
rs55730499	LPA	HF	Shah_et_al_2020
rs140570886	LPA	HF	Shah_et_al_2020
rs1556516	CDKN2B-AS1	HF	Shah_et_al_2020
rs600038	ABO	HF	Shah_et_al_2020
rs600038	SURF1	HF	Shah_et_al_2020
rs4746140	SYNPO2L	HF	Shah_et_al_2020
rs4746140	AGAP5	HF	Shah_et_al_2020
rs17617337	BAG3	HF	Shah_et_al_2020
rs4766578	ATXN2	HF	Shah_et_al_2020
rs56094641	FTO	HF	Shah_et_al_2020
rs740363	KIAA1598	HF	Larson_et_al_2007
rs10519210	USP3	HF	Smith_et_al_2010
rs11172782	LRIG3	HF	Smith_et_al_2010
rs1739843	HSPB7	HF	Stark_et_al_2010
rs10927875	HSPB7	HF	Villard_et_al_2011
rs2234962	BAG3	HF	Villard_et_al_2011
rs9262635	HCG22	HF	Meder_et_al_2014
rs9262636	HCG22	HF	Meder_et_al_2014
rs17568359	NOVA1	Echocardiographic_Traits	Vasan_et_al_2009
rs7565161	CALM2	Echocardiographic_Traits	Vasan_et_al_2009
rs8031633	MEIS2	Echocardiographic_Traits	Vasan_et_al_2009
rs89107	SLC35F1	Echocardiographic_Traits	Vasan_et_al_2009
rs11153768	C6orf204	Echocardiographic_Traits	Vasan_et_al_2009
rs7910620	GRID1	Echocardiographic_Traits	Vasan_et_al_2009
rs2059238	WWOX	Echocardiographic_Traits	Vasan_et_al_2009
rs17132261	SLC25A46	Echocardiographic_Traits	Vasan_et_al_2009
rs2235487	HN1L	Echocardiographic_Traits	Vasan_et_al_2009
rs10852932	SMG6	Echocardiographic_Traits	Vasan_et_al_2009
rs4523957	SRR	Echocardiographic_Traits	Vasan_et_al_2009
rs413016	TSR1	Echocardiographic_Traits	Vasan_et_al_2009
rs17608766	GOSR2	Echocardiographic_Traits	Vasan_et_al_2009
rs7543130	PALMD	Echocardiographic_Traits	Vasan_et_al_2009
rs17470137	CCDC100	Echocardiographic_Traits	Vasan_et_al_2009
rs4026608	HMGA2	Echocardiographic_Traits	Vasan_et_al_2009
rs10770612	PDE3A	Echocardiographic_Traits	Vasan_et_al_2009
rs893817	LOXL1	Echocardiographic_Traits	Vasan_et_al_2009
rs11153768	PLN	Echocardiographic_Traits	Vasan_et_al_2009
rs409045	RAI14	Echocardiographic_LV_mass	Arnett_et_al_2009
rs6450415	FLJ35954	Echocardiographic_LV_mass	Arnett_et_al_2009
rs1833534	CCNG1	Echocardiographic_LV_mass	Arnett_et_al_2009
rs6961069	SEMA3C	Echocardiographic_LV_mass	Arnett_et_al_2009
rs10499859	CD36	Echocardiographic_LV_mass	Arnett_et_al_2009
rs4129000	LOC729298	Echocardiographic_LV_mass	Arnett_et_al_2009
rs4129218	LOC729298	Echocardiographic_LV_mass	Arnett_et_al_2009
rs1155635	KLHL1	Echocardiographic_LV_mass	Arnett_et_al_2009
rs238688	ATRN	Echocardiographic_LV_mass	Arnett_et_al_2009
rs756529	KCNB1	Echocardiographic_LV_mass	Arnett_et_al_2009
rs10483186	LOC91464	Echocardiographic_LV_mass	Arnett_et_al_2009
rs806322	KCNRG	Echocardiographic_structural_and_systolic_function	Wild_et_al_2017
rs6702619	PALMD	Echocardiographic_structural_and_systolic_function	Wild_et_al_2017
rs10770612	PDE3A	Echocardiographic_structural_and_systolic_function	Wild_et_al_2017
rs17469907	CCDC100	Echocardiographic_structural_and_systolic_function	Wild_et_al_2017
rs1532292	SMG6	Echocardiographic_structural_and_systolic_function	Wild_et_al_2017
rs10878359	HMGA2	Echocardiographic_structural_and_systolic_function	Wild_et_al_2017
rs17696696	CFDP1	Echocardiographic_structural_and_systolic_function	Wild_et_al_2017
rs7127129	TMEM16A	Echocardiographic_structural_and_systolic_function	Wild_et_al_2017
rs17608766	GOSR2	Echocardiographic_structural_and_systolic_function	Wild_et_al_2017
rs2649	USP3	Echocardiographic_structural_and_systolic_function	Wild_et_al_2017
rs4765663	CACNA1C	Echocardiographic_structural_and_systolic_function	Wild_et_al_2017
rs11207426	FGGY	Echocardiographic_structural_and_systolic_function	Wild_et_al_2017
rs11153730	SLC35F1	Echocardiographic_structural_and_systolic_function	Wild_et_al_2017
rs12541595	MTSS1	Echocardiographic_structural_and_systolic_function	Wild_et_al_2017
rs10774625	ATXN2	Echocardiographic_structural_and_systolic_function	Wild_et_al_2017
rs1454157	SPCS3	Echocardiographic_structural_and_systolic_function	Wild_et_al_2017
rs9470361	CDKN1A	Echocardiographic_structural_and_systolic_function	Wild_et_al_2017
rs4552930	UBE2V2	echocardiographic_cardiac_structure	Fox_et_al_2013
rs7213314	WIPI1	echocardiographic_cardiac_structure	Fox_et_al_2013
rs1571099	PPAPDC1A	echocardiographic_cardiac_structure	Fox_et_al_2013
rs9530176	KLF5	echocardiographic_cardiac_structure	Fox_et_al_2013
rs7213314	PRKAR1A	echocardiographic_cardiac_structure	Fox_et_al_2013
rs7213314	FAM20A	echocardiographic_cardiac_structure	Fox_et_al_2013
rs9530176	PIBF1	echocardiographic_cardiac_structure	Fox_et_al_2013
rs7213314	ABCA8	echocardiographic_cardiac_structure	Fox_et_al_2013
rs1320448	COL17A1	Cardiac_hypertrophy	Parsa_et_al_2011
rs12757165	ESRRG	Cardiac_hypertrophy	Parsa_et_al_2011
rs16830359	SLC2A1	Cardiac_hypertrophy	Parsa_et_al_2011
rs10947055	TRIM38	Cardiac_hypertrophy	Parsa_et_al_2011
rs1916521	ZWINT	Cardiac_hypertrophy	Parsa_et_al_2011
rs1484170	NRG3	Cardiac_hypertrophy	Parsa_et_al_2011
rs6995588	CA8	Cardiac_hypertrophy	Parsa_et_al_2011
rs4520040	GRIK2	Cardiac_hypertrophy	Parsa_et_al_2011
rs769554	DPPA4	Cardiac_hypertrophy	Parsa_et_al_2011
rs4236016	SOX4	Cardiac_hypertrophy	Parsa_et_al_2011
rs17636733	UBE3A	Cardiac_hypertrophy	Parsa_et_al_2011
rs1575891	HTR2A	Cardiac_hypertrophy	Parsa_et_al_2011
rs3729931	RAF1	Cardiac_hypertrophy	Parsa_et_al_2011
rs17259784	PLXNA2	Cardiac_hypertrophy	Parsa_et_al_2011
rs152528	FGF1	Cardiac_hypertrophy	Parsa_et_al_2011
rs4686148	GRM7	Cardiac_hypertrophy	Parsa_et_al_2011
rs10506410	FAM19A2	Cardiac_hypertrophy	Parsa_et_al_2011
rs6817687	KCNIP4	Cardiac_hypertrophy	Parsa_et_al_2011
rs12907914	C15orf54	Cardiac_hypertrophy	Parsa_et_al_2011
rs2207418	20p12	Cardiac_hypertrophy	Parsa_et_al_2011
rs2031532	PHF11	Cardiac_hypertrophy	Parsa_et_al_2011
rs6795970	SCN10A	PR interval	Chambers_et_al_2010
rs365990	MYH6	heart_rate	Holm_et_al_2010
rs3825214	TBX5	PR_interval	Holm_et_al_2010
rs6795970	SCN10A	PR_interval	Holm_et_al_2010
rs3807989	CAV1	PR_interval	Holm_et_al_2010
rs7660702	ARHGAP24	PR_interval	Holm_et_al_2010
rs3825214	TBX5	QRS_duration	Holm_et_al_2010
rs6795970	SCN10A	QRS_duration	Holm_et_al_2010
rs6801957	SCN10A	QRS_duration	Sotoodehnia_et_al_2010
rs9851724	SCN10A	QRS_duration	Sotoodehnia_et_al_2010
rs9851724	SCN5A	QRS_duration	Sotoodehnia_et_al_2010
rs10865879	SCN5A	QRS_duration	Sotoodehnia_et_al_2010
rs11710077	SCN5A	QRS_duration	Sotoodehnia_et_al_2010
rs11708996	SCN5A	QRS_duration	Sotoodehnia_et_al_2010
rs10865879	EXOG	QRS_duration	Sotoodehnia_et_al_2010
rs2051211	EXOG	QRS_duration	Sotoodehnia_et_al_2010
rs9470361	CDKN1A	QRS_duration	Sotoodehnia_et_al_2010
rs11153730	C6orf204	QRS_duration	Sotoodehnia_et_al_2010
rs9436640	NFIA	QRS_duration	Sotoodehnia_et_al_2010
rs13165478	HAND1	QRS_duration	Sotoodehnia_et_al_2010
rs1362212	TBX20	QRS_duration	Sotoodehnia_et_al_2010
rs11848785	SIPA1L1	QRS_duration	Sotoodehnia_et_al_2010
rs883079	TBX5	QRS_duration	Sotoodehnia_et_al_2010
rs10850409	TBX3	QRS_duration	Sotoodehnia_et_al_2010
rs7342028	VTI1A	QRS_duration	Sotoodehnia_et_al_2010
rs991014	SETBP1	QRS_duration	Sotoodehnia_et_al_2010
rs17020136	HEATR5B	QRS_duration	Sotoodehnia_et_al_2010
rs4687718	TKT	QRS_duration	Sotoodehnia_et_al_2010
rs7562790	CRIM1	QRS_duration	Sotoodehnia_et_al_2010
rs17391905	C1orf185	QRS_duration	Sotoodehnia_et_al_2010
rs9912468	PRKCA	QRS_duration	Sotoodehnia_et_al_2010
rs7784776	IGFBP3	QRS_duration	Sotoodehnia_et_al_2010
rs4074536	CASQ2	QRS_duration	Sotoodehnia_et_al_2010
rs1886512	KLF12	QRS_duration	Sotoodehnia_et_al_2010
rs2242285	LRIG1	QRS_duration	Sotoodehnia_et_al_2010
rs1733724	DKK1	QRS_duration	Sotoodehnia_et_al_2010
rs17608766	GOSR2	QRS_duration	Sotoodehnia_et_al_2010
rs11153730	PLN	QRS_duration	Sotoodehnia_et_al_2010
rs11153730	BRD7P3	QRS_duration	Sotoodehnia_et_al_2010
rs4687718	CACNA1D	QRS_duration	Sotoodehnia_et_al_2010
rs17391905	CDKN2C	QRS_duration	Sotoodehnia_et_al_2010
rs11153730	SLC35F1	QRS_duration	Sotoodehnia_et_al_2010
rs17391905	FAF1	QRS_duration	Sotoodehnia_et_al_2010
rs13165478	SAP30L	QRS_duration	Sotoodehnia_et_al_2010
rs17020136	STRN	QRS_duration	Sotoodehnia_et_al_2010
rs4687718	PRKCD	QRS_duration	Sotoodehnia_et_al_2010
rs17391905	RNF11	QRS_duration	Sotoodehnia_et_al_2010
rs2242285	SLC25A26	QRS_duration	Sotoodehnia_et_al_2010
rs2849028	ZNF436	Electrocardiographic_QRS_traits	van_der_Hast_et_al_2016
rs2849028	C1orf213	Electrocardiographic_QRS_traits	van_der_Hast_et_al_2016
rs17391905	CDKN2C	Electrocardiographic_QRS_traits	van_der_Hast_et_al_2016
rs2207790	NFIA	Electrocardiographic_QRS_traits	van_der_Hast_et_al_2016
rs12039739	CASQ2	Electrocardiographic_QRS_traits	van_der_Hast_et_al_2016
rs2274317	MEF2D	Electrocardiographic_QRS_traits	van_der_Hast_et_al_2016
rs12036340	OLFML2B	Electrocardiographic_QRS_traits	van_der_Hast_et_al_2016
rs10920184	TNNT2	Electrocardiographic_QRS_traits	van_der_Hast_et_al_2016
rs4288653	PLEKHA6	Electrocardiographic_QRS_traits	van_der_Hast_et_al_2016
rs6710065	DPYSL5	Electrocardiographic_QRS_traits	van_der_Hast_et_al_2016
rs3770770	STRN	Electrocardiographic_QRS_traits	van_der_Hast_et_al_2016
rs3816849	TTN	Electrocardiographic_QRS_traits	van_der_Hast_et_al_2016
rs6801957	SCN10A	Electrocardiographic_QRS_traits	van_der_Hast_et_al_2016
rs4687718	TKT	Electrocardiographic_QRS_traits	van_der_Hast_et_al_2016
rs2242285	LRIG1	Electrocardiographic_QRS_traits	van_der_Hast_et_al_2016
rs2242285	SLC25A26	Electrocardiographic_QRS_traits	van_der_Hast_et_al_2016
rs13314892	MITF	Electrocardiographic_QRS_traits	van_der_Hast_et_al_2016
rs10937226	SENP2	Electrocardiographic_QRS_traits	van_der_Hast_et_al_2016
rs1344852	SLIT2	Electrocardiographic_QRS_traits	van_der_Hast_et_al_2016
rs13185595	HAND1	Electrocardiographic_QRS_traits	van_der_Hast_et_al_2016
rs1321311	CDKN1A	Electrocardiographic_QRS_traits	van_der_Hast_et_al_2016
rs1015150	TFEB	Electrocardiographic_QRS_traits	van_der_Hast_et_al_2016
rs11153730	PLN	Electrocardiographic_QRS_traits	van_der_Hast_et_al_2016
rs11153730	SLC35F1	Electrocardiographic_QRS_traits	van_der_Hast_et_al_2016
rs11153730	CEP85L	Electrocardiographic_QRS_traits	van_der_Hast_et_al_2016
rs1419856	TBX20	Electrocardiographic_QRS_traits	van_der_Hast_et_al_2016
rs6968945	TNS3	Electrocardiographic_QRS_traits	van_der_Hast_et_al_2016
rs11773845	CAV1	Electrocardiographic_QRS_traits	van_der_Hast_et_al_2016
rs4367519	FBXO32	Electrocardiographic_QRS_traits	van_der_Hast_et_al_2016
rs4367519	KLHL38	Electrocardiographic_QRS_traits	van_der_Hast_et_al_2016
rs10105974	MTSS1	Electrocardiographic_QRS_traits	van_der_Hast_et_al_2016
rs1733724	DKK1	Electrocardiographic_QRS_traits	van_der_Hast_et_al_2016
rs12414364, rs10509289	CTNNA3	Electrocardiographic_QRS_traits	van_der_Hast_et_al_2016
rs7099599	SEC24C	Electrocardiographic_QRS_traits	van_der_Hast_et_al_2016
rs7099599	SYNPO2L	Electrocardiographic_QRS_traits	van_der_Hast_et_al_2016
rs7099599	CAMK2G	Electrocardiographic_QRS_traits	van_der_Hast_et_al_2016
rs7918405	VTI1A	Electrocardiographic_QRS_traits	van_der_Hast_et_al_2016
rs2269434	MYBPC3	Electrocardiographic_QRS_traits	van_der_Hast_et_al_2016
rs2269434	NR1H3	Electrocardiographic_QRS_traits	van_der_Hast_et_al_2016
rs2269434	ACP2	Electrocardiographic_QRS_traits	van_der_Hast_et_al_2016
rs2269434	MADD	Electrocardiographic_QRS_traits	van_der_Hast_et_al_2016
rs174577	FADS2	Electrocardiographic_QRS_traits	van_der_Hast_et_al_2016
rs174577	TMEM258	Electrocardiographic_QRS_traits	van_der_Hast_et_al_2016
rs736825	HOXC4	Electrocardiographic_QRS_traits	van_der_Hast_et_al_2016
rs736825	HOXC5	Electrocardiographic_QRS_traits	van_der_Hast_et_al_2016
rs736825	HOXC6	Electrocardiographic_QRS_traits	van_der_Hast_et_al_2016
rs2926743	NACA	Electrocardiographic_QRS_traits	van_der_Hast_et_al_2016
rs7132327	TBX3	Electrocardiographic_QRS_traits	van_der_Hast_et_al_2016
rs1408224	LRCH1	Electrocardiographic_QRS_traits	van_der_Hast_et_al_2016
rs728926	KLF12	Electrocardiographic_QRS_traits	van_der_Hast_et_al_2016
rs12880291	SIPA1L1	Electrocardiographic_QRS_traits	van_der_Hast_et_al_2016
rs7183401	ALPK3	Electrocardiographic_QRS_traits	van_der_Hast_et_al_2016
rs8038015	IGF1R	Electrocardiographic_QRS_traits	van_der_Hast_et_al_2016
rs6565060	CDH13	Electrocardiographic_QRS_traits	van_der_Hast_et_al_2016
rs7211246	NSRP1	Electrocardiographic_QRS_traits	van_der_Hast_et_al_2016
rs7211246	EFCAB5	Electrocardiographic_QRS_traits	van_der_Hast_et_al_2016
rs242562	MAPT	Electrocardiographic_QRS_traits	van_der_Hast_et_al_2016
rs9912468	PRKCA	Electrocardiographic_QRS_traits	van_der_Hast_et_al_2016
rs617759	MAPRE2	Electrocardiographic_QRS_traits	van_der_Hast_et_al_2016
rs879568	FHOD3	Electrocardiographic_QRS_traits	van_der_Hast_et_al_2016
rs10853525	SETBP1	Electrocardiographic_QRS_traits	van_der_Hast_et_al_2016
rs3929778	BMP2	Electrocardiographic_QRS_traits	van_der_Hast_et_al_2016
rs2025096	MYH7B	Electrocardiographic_QRS_traits	van_der_Hast_et_al_2016
rs2025096	GSS	Electrocardiographic_QRS_traits	van_der_Hast_et_al_2016
rs2025096	EDEM2	Electrocardiographic_QRS_traits	van_der_Hast_et_al_2016
rs7283707	USP25	Electrocardiographic_QRS_traits	van_der_Hast_et_al_2016
rs13047360	ADAMTS5	Electrocardiographic_QRS_traits	van_der_Hast_et_al_2016
rs17853159	TESK2	Resting_heart_rate	Van_den_Berg_et_al_2017
rs3087866	DALRD3	Resting_heart_rate	Van_den_Berg_et_al_2017
rs1635852	JAZF1	Resting_heart_rate	Van_den_Berg_et_al_2017
rs10857472	C10orf71	Resting_heart_rate	Van_den_Berg_et_al_2017
rs3793706	SEC31B	Resting_heart_rate	Van_den_Berg_et_al_2017
rs709209	RNF207	Resting_heart_rate	Van_den_Berg_et_al_2017
rs6795970	SCN10A	Resting_heart_rate	Van_den_Berg_et_al_2017
rs12004	KDELR3	Resting_heart_rate	Van_den_Berg_et_al_2017
rs365990	MYH6	Resting_heart_rate	den_Hoed_et_al_2013
rsl015451	GJA1	Resting_heart_rate	den_Hoed_et_al_2013
rsl3245899	ACHE	Resting_heart_rate	den_Hoed_et_al_2013
rs11118555	CD46	Resting_heart_rate	den_Hoed_et_al_2013
rsl74549	FADS1	Resting_heart_rate	den_Hoed_et_al_2013
rslll53730	SLC35F1	Resting_heart_rate	den_Hoed_et_al_2013
rsl7287293	LINC00477	Resting_heart_rate	den_Hoed_et_al_2013
rs6127471	KIAA1755	Resting_heart_rate	den_Hoed_et_al_2013
rs17362588	CCDC141	Resting_heart_rate	den_Hoed_et_al_2013
rs7980799	SYT10	Resting_heart_rate	den_Hoed_et_al_2013
rs4489968	HCN4	Resting_heart_rate	den_Hoed_et_al_2013
rs7612445	GNB4	Resting_heart_rate	den_Hoed_et_al_2013
rsl7796783	FLRT2	Resting_heart_rate	den_Hoed_et_al_2013
rs2350782	CHRM2	Resting_heart_rate	den_Hoed_et_al_2013
rs6882776	NKX2-5	Resting_heart_rate	den_Hoed_et_al_2013
rsl80242	GNG11	Resting_heart_rate	den_Hoed_et_al_2013
rsl3030174	B3GNT7	Resting_heart_rate	den_Hoed_et_al_2013
rs9647379	FNDC3B	Resting_heart_rate	den_Hoed_et_al_2013
rs2067615	RFX4	Resting_heart_rate	den_Hoed_et_al_2013
rs826838	CPNE8	Resting_heart_rate	den_Hoed_et_al_2013
rs4140885	TFPI	Resting_heart_rate	den_Hoed_et_al_2013
rs145358377	ICMT	Resting_heart_rate	Eppinga_et_al_2016
rs145358377	RNF207	Resting_heart_rate	Eppinga_et_al_2016
rs272564	RNF220	Resting_heart_rate	Eppinga_et_al_2016
rs2152735	LMO4	Resting_heart_rate	Eppinga_et_al_2016
rs11454451	GPATCH2	Resting_heart_rate	Eppinga_et_al_2016
rs1260326	GCKR	Resting_heart_rate	Eppinga_et_al_2016
rs12713404	BCL11A	Resting_heart_rate	Eppinga_et_al_2016
rs564190295	WIPF1	Resting_heart_rate	Eppinga_et_al_2016
rs907683	SPEG	Resting_heart_rate	Eppinga_et_al_2016
rs4608502	COL4A3	Resting_heart_rate	Eppinga_et_al_2016
rs41312411	SCN5A	Resting_heart_rate	Eppinga_et_al_2016
rs3749237	IP6K1	Resting_heart_rate	Eppinga_et_al_2016
rs2358740	CACNA1D	Resting_heart_rate	Eppinga_et_al_2016
rs1483890	FRMD4B	Resting_heart_rate	Eppinga_et_al_2016
rs11920570	CCDC58	Resting_heart_rate	Eppinga_et_al_2016
rs12501032	PPARGC1A	Resting_heart_rate	Eppinga_et_al_2016
rs6845865	ARHGAP10	Resting_heart_rate	Eppinga_et_al_2016
rs13165531	CDH6	Resting_heart_rate	Eppinga_et_al_2016
rs1468333	CDC23	Resting_heart_rate	Eppinga_et_al_2016
rs236349	PPIL1	Resting_heart_rate	Eppinga_et_al_2016
rs58437978	TBX20	Resting_heart_rate	Eppinga_et_al_2016
rs41748	MET	Resting_heart_rate	Eppinga_et_al_2016
rs11563648	ZNF800	Resting_heart_rate	Eppinga_et_al_2016
rs138186803	MKLN1	Resting_heart_rate	Eppinga_et_al_2016
rs56233017	PLEC	Resting_heart_rate	Eppinga_et_al_2016
rs10739663	MAPKAP1	Resting_heart_rate	Eppinga_et_al_2016
rs12576326	TP53I11	Resting_heart_rate	Eppinga_et_al_2016
rs75190942	KCNJ5	Resting_heart_rate	Eppinga_et_al_2016
rs2283274	CACNA1C	Resting_heart_rate	Eppinga_et_al_2016
rs10841486	PDE3A	Resting_heart_rate	Eppinga_et_al_2016
rs1050288	KLHL42	Resting_heart_rate	Eppinga_et_al_2016
rs10880689	ALG10B	Resting_heart_rate	Eppinga_et_al_2016
rs867400	RASSF3	Resting_heart_rate	Eppinga_et_al_2016
rs12579753	PPFIA2	Resting_heart_rate	Eppinga_et_al_2016
rs12889267	NDRG2	Resting_heart_rate	Eppinga_et_al_2016
rs17180489	RGS6	Resting_heart_rate	Eppinga_et_al_2016
rs1549118	ADCK1	Resting_heart_rate	Eppinga_et_al_2016
rs4900069	C14orf159	Resting_heart_rate	Eppinga_et_al_2016
rs3915499	MYH11	Resting_heart_rate	Eppinga_et_al_2016
rs7194801	CDH11	Resting_heart_rate	Eppinga_et_al_2016
rs79121763	TEKT3	Resting_heart_rate	Eppinga_et_al_2016
rs11083258	CDH2	Resting_heart_rate	Eppinga_et_al_2016
rs61735998	FHOD3	Resting_heart_rate	Eppinga_et_al_2016
rs16974196	C19orf47	Resting_heart_rate	Eppinga_et_al_2016
rs12721051	APOE	Resting_heart_rate	Eppinga_et_al_2016
rs17265513	ZHX3	Resting_heart_rate	Eppinga_et_al_2016
rs2076028	SUN2	Resting_heart_rate	Eppinga_et_al_2016
rs2076028	CBY1	Resting_heart_rate	Eppinga_et_al_2016
rs2076028	FAM227A	Resting_heart_rate	Eppinga_et_al_2016
rs2076028	JOSD1	Resting_heart_rate	Eppinga_et_al_2016
rs2076028	TOMM22	Resting_heart_rate	Eppinga_et_al_2016
rs2076028	DDX17	Resting_heart_rate	Eppinga_et_al_2016
rs2076028	GTPBP1	Resting_heart_rate	Eppinga_et_al_2016
rs3749237	GMPPB	Resting_heart_rate	Eppinga_et_al_2016
rs3749237	FAM212A	Resting_heart_rate	Eppinga_et_al_2016
rs3749237	DAG1	Resting_heart_rate	Eppinga_et_al_2016
rs3749237	KLHDC8B	Resting_heart_rate	Eppinga_et_al_2016
rs3749237	LAMB2	Resting_heart_rate	Eppinga_et_al_2016
rs3749237	PRKAR2A	Resting_heart_rate	Eppinga_et_al_2016
rs3749237	QRICH1	Resting_heart_rate	Eppinga_et_al_2016
rs6845865	EDNRA	Resting_heart_rate	Eppinga_et_al_2016
rs907683	DES	Resting_heart_rate	Eppinga_et_al_2016
rs3749237	FAM212A	Resting_heart_rate	Eppinga_et_al_2016
rs75190942	C11orf45	Resting_heart_rate	Eppinga_et_al_2016
rs12889267	ARHGEF40	Resting_heart_rate	Eppinga_et_al_2016
rs12889267	ZNF219	Resting_heart_rate	Eppinga_et_al_2016
rs79121763	PMP22	Resting_heart_rate	Eppinga_et_al_2016
rs12721051	PVRL2	Resting_heart_rate	Eppinga_et_al_2016
rs16974196	MAP3K10	Resting_heart_rate	Eppinga_et_al_2016
rs12721051	APOC1	Resting_heart_rate	Eppinga_et_al_2016
rs17265513	EMILIN3	Resting_heart_rate	Eppinga_et_al_2016
rs284277	CASZ1	atrial_fibrillation	Nielsen_et_al_2018
rs7529220	HSPG2	atrial_fibrillation	Nielsen_et_al_2018
rs2885697	SCMH1	atrial_fibrillation	Nielsen_et_al_2018
rs11590635	AGBL4	atrial_fibrillation	Nielsen_et_al_2018
rs146518726	MIR6500	atrial_fibrillation	Nielsen_et_al_2018
rs1545300	KCND3	atrial_fibrillation	Nielsen_et_al_2018
rs4073778	CASQ2	atrial_fibrillation	Nielsen_et_al_2018
rs79187193	GJA5	atrial_fibrillation	Nielsen_et_al_2018
rs11264280	KCNN3	atrial_fibrillation	Nielsen_et_al_2018
rs72700114	LINC01142	atrial_fibrillation	Nielsen_et_al_2018
rs10753933	PPFIA4	atrial_fibrillation	Nielsen_et_al_2018
rs4951258	SLC41A1	atrial_fibrillation	Nielsen_et_al_2018
rs4951258	NUCKS1	atrial_fibrillation	Nielsen_et_al_2018
rs7578393	KIF3C	atrial_fibrillation	Nielsen_et_al_2018
rs11125871	USP34	atrial_fibrillation	Nielsen_et_al_2018
rs2540949	CEP68	atrial_fibrillation	Nielsen_et_al_2018
rs6747542	ANXA4	atrial_fibrillation	Nielsen_et_al_2018
rs6747542	GMCL1	atrial_fibrillation	Nielsen_et_al_2018
rs72926475	REEP1	atrial_fibrillation	Nielsen_et_al_2018
rs28387148	GYPC	atrial_fibrillation	Nielsen_et_al_2018
rs67969609	TEX41	atrial_fibrillation	Nielsen_et_al_2018
rs56181519	WIPF1	atrial_fibrillation	Nielsen_et_al_2018
rs2288327	TTN	atrial_fibrillation	Nielsen_et_al_2018
rs2288327	MIR548N	atrial_fibrillation	Nielsen_et_al_2018
rs2288327	FKBP7	atrial_fibrillation	Nielsen_et_al_2018
rs2288327	TTN-AS1	atrial_fibrillation	Nielsen_et_al_2018
rs3820888	SPATS2L	atrial_fibrillation	Nielsen_et_al_2018
rs35544454	ERBB4	atrial_fibrillation	Nielsen_et_al_2018
rs7650482	CAND2	atrial_fibrillation	Nielsen_et_al_2018
rs73041705	THRB	atrial_fibrillation	Nielsen_et_al_2018
rs6790396	SCN10A	atrial_fibrillation	Nielsen_et_al_2018
rs6790396	SCN5A	atrial_fibrillation	Nielsen_et_al_2018
rs34080181	LRIG1	atrial_fibrillation	Nielsen_et_al_2018
rs34080181	SLC25A26	atrial_fibrillation	Nielsen_et_al_2018
rs17005647	FRMD4B	atrial_fibrillation	Nielsen_et_al_2018
rs6771054	EPHA3	atrial_fibrillation	Nielsen_et_al_2018
rs10804493	PHLDB2	atrial_fibrillation	Nielsen_et_al_2018
rs10804493	PLCXD2	atrial_fibrillation	Nielsen_et_al_2018
rs1278493	PPP2R3A	atrial_fibrillation	Nielsen_et_al_2018
rs7612445	GNB4	atrial_fibrillation	Nielsen_et_al_2018
rs60902112	XXYLT1	atrial_fibrillation	Nielsen_et_al_2018
rs1458038	FGF5	atrial_fibrillation	Nielsen_et_al_2018
rs10006327	SLC9B1	atrial_fibrillation	Nielsen_et_al_2018
rs67249485	PITX2	atrial_fibrillation	Nielsen_et_al_2018
rs6829664	CAMK2D	atrial_fibrillation	Nielsen_et_al_2018
rs10213171	ARHGAP10	atrial_fibrillation	Nielsen_et_al_2018
rs12648245	HAND2	atrial_fibrillation	Nielsen_et_al_2018
rs12648245	HAND2-AS1	atrial_fibrillation	Nielsen_et_al_2018
rs6596717	LOC102467213	atrial_fibrillation	Nielsen_et_al_2018
rs337705	KCNN2	atrial_fibrillation	Nielsen_et_al_2018
rs2012809	SLC27A6	atrial_fibrillation	Nielsen_et_al_2018
rs2040862	WNT8A	atrial_fibrillation	Nielsen_et_al_2018
rs2040862	NPY6R	atrial_fibrillation	Nielsen_et_al_2018
rs2040862	MYOT	atrial_fibrillation	Nielsen_et_al_2018
rs2040862	FAM13B	atrial_fibrillation	Nielsen_et_al_2018
rs6580277	NR3C1	atrial_fibrillation	Nielsen_et_al_2018
rs12188351	SLIT3	atrial_fibrillation	Nielsen_et_al_2018
rs6891790	NKX2-5	atrial_fibrillation	Nielsen_et_al_2018
rs73366713	ATXN1	atrial_fibrillation	Nielsen_et_al_2018
rs34969716	KDM1B	atrial_fibrillation	Nielsen_et_al_2018
rs34969716	DEK	atrial_fibrillation	Nielsen_et_al_2018
rs3176326	CDKN1A	atrial_fibrillation	Nielsen_et_al_2018
rs3176326	PANDAR	atrial_fibrillation	Nielsen_et_al_2018
rs3176326	PI16	atrial_fibrillation	Nielsen_et_al_2018
rs2031522	CGA	atrial_fibrillation	Nielsen_et_al_2018
rs3951016	SLC35F1	atrial_fibrillation	Nielsen_et_al_2018
rs3951016	PLN	atrial_fibrillation	Nielsen_et_al_2018
rs13195459	HSF2	atrial_fibrillation	Nielsen_et_al_2018
rs117984853	UST	atrial_fibrillation	Nielsen_et_al_2018
rs55734480	DGKB	atrial_fibrillation	Nielsen_et_al_2018
rs6462079	CREB5	atrial_fibrillation	Nielsen_et_al_2018
rs35005436	GTF2I	atrial_fibrillation	Nielsen_et_al_2018
rs35005436	LOC101926943	atrial_fibrillation	Nielsen_et_al_2018
rs35005436	GTF2IRD2	atrial_fibrillation	Nielsen_et_al_2018
rs56201652	CDK6	atrial_fibrillation	Nielsen_et_al_2018
rs11773845	CAV1	atrial_fibrillation	Nielsen_et_al_2018
rs11773845	CAV2	atrial_fibrillation	Nielsen_et_al_2018
rs55985730	OPN1SW	atrial_fibrillation	Nielsen_et_al_2018
rs55985730	CALU	atrial_fibrillation	Nielsen_et_al_2018
rs7789146	KCNH2	atrial_fibrillation	Nielsen_et_al_2018
rs35620480	GATA4	atrial_fibrillation	Nielsen_et_al_2018
rs7508	ASAH1	atrial_fibrillation	Nielsen_et_al_2018
rs7834729	XPO7	atrial_fibrillation	Nielsen_et_al_2018
rs62521286	FBXO32	atrial_fibrillation	Nielsen_et_al_2018
rs6994744	PTK2	atrial_fibrillation	Nielsen_et_al_2018
rs10821415	C9orf3	atrial_fibrillation	Nielsen_et_al_2018
rs2274115	LHX3	atrial_fibrillation	Nielsen_et_al_2018
rs12245149	REEP3	atrial_fibrillation	Nielsen_et_al_2018
rs12245149	NRBF2	atrial_fibrillation	Nielsen_et_al_2018
rs7096385	SIRT1	atrial_fibrillation	Nielsen_et_al_2018
rs7096385	MYPN	atrial_fibrillation	Nielsen_et_al_2018
rs60212594	SYNPO2L	atrial_fibrillation	Nielsen_et_al_2018
rs60212594	NUDT13	atrial_fibrillation	Nielsen_et_al_2018
rs60212594	MYOZ1	atrial_fibrillation	Nielsen_et_al_2018
rs60212594	AGAP5	atrial_fibrillation	Nielsen_et_al_2018
rs10458660	C10orf11	atrial_fibrillation	Nielsen_et_al_2018
rs11598047	NEURL1	atrial_fibrillation	Nielsen_et_al_2018
rs10749053	RBM20	atrial_fibrillation	Nielsen_et_al_2018
rs10741807	NAV2	atrial_fibrillation	Nielsen_et_al_2018
rs4935786	SORL1	atrial_fibrillation	Nielsen_et_al_2018
rs76097649	KCNJ5	atrial_fibrillation	Nielsen_et_al_2018
rs4963776	LINC00477	atrial_fibrillation	Nielsen_et_al_2018
rs17380837	SSPN	atrial_fibrillation	Nielsen_et_al_2018
rs12809354	PKP2	atrial_fibrillation	Nielsen_et_al_2018
rs2860482	NACA	atrial_fibrillation	Nielsen_et_al_2018
rs71454237	LRRC10	atrial_fibrillation	Nielsen_et_al_2018
rs12426679	PHLDA1	atrial_fibrillation	Nielsen_et_al_2018
rs883079	TBX5	atrial_fibrillation	Nielsen_et_al_2018
rs10773657	HIP1R	atrial_fibrillation	Nielsen_et_al_2018
rs6560886	FBRSL1	atrial_fibrillation	Nielsen_et_al_2018
rs9506925	LINC00540	atrial_fibrillation	Nielsen_et_al_2018
rs9506925	LINC00621	atrial_fibrillation	Nielsen_et_al_2018
rs9506925	SGCG	atrial_fibrillation	Nielsen_et_al_2018
rs35569628	CUL4A	atrial_fibrillation	Nielsen_et_al_2018
rs422068	MYH6	atrial_fibrillation	Nielsen_et_al_2018
rs422068	MYH7	atrial_fibrillation	Nielsen_et_al_2018
rs11156751	AKAP6	atrial_fibrillation	Nielsen_et_al_2018
rs73241997	CFL2	atrial_fibrillation	Nielsen_et_al_2018
rs2738413	SYNE2	atrial_fibrillation	Nielsen_et_al_2018
rs2738413	MIR548AZ	atrial_fibrillation	Nielsen_et_al_2018
rs2738413	ESR2	atrial_fibrillation	Nielsen_et_al_2018
rs2738413	MTHFD1	atrial_fibrillation	Nielsen_et_al_2018
rs74884082	DPF3	atrial_fibrillation	Nielsen_et_al_2018
rs10873298	IRF2BPL	atrial_fibrillation	Nielsen_et_al_2018
rs147301839	GCOM1	atrial_fibrillation	Nielsen_et_al_2018
rs147301839	MYZAP	atrial_fibrillation	Nielsen_et_al_2018
rs7170477	HERC1	atrial_fibrillation	Nielsen_et_al_2018
rs74022964	HCN4	atrial_fibrillation	Nielsen_et_al_2018
rs12908004	ARNT2	atrial_fibrillation	Nielsen_et_al_2018
rs4965430	IGF1R	atrial_fibrillation	Nielsen_et_al_2018
rs140185678	RPL3L	atrial_fibrillation	Nielsen_et_al_2018
rs2359171	ZFHX3	atrial_fibrillation	Nielsen_et_al_2018
rs7225165	YWHAE	atrial_fibrillation	Nielsen_et_al_2018
rs7225165	CRK	atrial_fibrillation	Nielsen_et_al_2018
rs7225165	MYO1C	atrial_fibrillation	Nielsen_et_al_2018
rs9899183	TNFSF12	atrial_fibrillation	Nielsen_et_al_2018
rs9899183	TNFSF12-TNFSF13	atrial_fibrillation	Nielsen_et_al_2018
rs9899183	SOX15	atrial_fibrillation	Nielsen_et_al_2018
rs9899183	FXR2	atrial_fibrillation	Nielsen_et_al_2018
rs72811294	MYOCD	atrial_fibrillation	Nielsen_et_al_2018
rs11658278	ZPBP2	atrial_fibrillation	Nielsen_et_al_2018
rs11658278	GSDMB	atrial_fibrillation	Nielsen_et_al_2018
rs11658278	ORMDL3	atrial_fibrillation	Nielsen_et_al_2018
rs1563304	WNT3	atrial_fibrillation	Nielsen_et_al_2018
rs12604076	CYTH1	atrial_fibrillation	Nielsen_et_al_2018
rs12604076	USP36	atrial_fibrillation	Nielsen_et_al_2018
rs9953366	SMAD7	atrial_fibrillation	Nielsen_et_al_2018
rs8088085	MEX3C	atrial_fibrillation	Nielsen_et_al_2018
rs2834618	LINC01426	atrial_fibrillation	Nielsen_et_al_2018
rs464901	TUBA8	atrial_fibrillation	Nielsen_et_al_2018
rs133902	MYO18B	atrial_fibrillation	Nielsen_et_al_2018
rs17162854	NADK	ECG_traits_and_atrial_fibrilation	Verweij_et_al_2020
rs17162854	TMEM52	ECG_traits_and_atrial_fibrilation	Verweij_et_al_2020
rs17162854	CFAP74	ECG_traits_and_atrial_fibrilation	Verweij_et_al_2020
rs17162854	CALML6	ECG_traits_and_atrial_fibrilation	Verweij_et_al_2020
rs17162854	SLC35E2	ECG_traits_and_atrial_fibrilation	Verweij_et_al_2020
rs2503715	C1orf86	ECG_traits_and_atrial_fibrilation	Verweij_et_al_2020
rs2503715	SKI	ECG_traits_and_atrial_fibrilation	Verweij_et_al_2020
rs60965469	PRDM16	ECG_traits_and_atrial_fibrilation	Verweij_et_al_2020
rs846111	RPL22	ECG_traits_and_atrial_fibrilation	Verweij_et_al_2020
rs846111	RNF207	ECG_traits_and_atrial_fibrilation	Verweij_et_al_2020
rs846111	ICMT	ECG_traits_and_atrial_fibrilation	Verweij_et_al_2020
rs578347	CASZ1	ECG_traits_and_atrial_fibrilation	Verweij_et_al_2020
rs113712703	CLCN6	ECG_traits_and_atrial_fibrilation	Verweij_et_al_2020
rs113712703	NPPA	ECG_traits_and_atrial_fibrilation	Verweij_et_al_2020
rs113712703	MTHFR	ECG_traits_and_atrial_fibrilation	Verweij_et_al_2020
rs1763604	C1orf64	ECG_traits_and_atrial_fibrilation	Verweij_et_al_2020
rs1763604	HSPB7	ECG_traits_and_atrial_fibrilation	Verweij_et_al_2020
rs1763604	CLCNKA	ECG_traits_and_atrial_fibrilation	Verweij_et_al_2020
rs2298632	TCEA3	ECG_traits_and_atrial_fibrilation	Verweij_et_al_2020
rs61775418	TRIM63	ECG_traits_and_atrial_fibrilation	Verweij_et_al_2020
rs61775418	CNKSR1	ECG_traits_and_atrial_fibrilation	Verweij_et_al_2020
rs61775418	GRRP1	ECG_traits_and_atrial_fibrilation	Verweij_et_al_2020
rs61775418	SLC30A2	ECG_traits_and_atrial_fibrilation	Verweij_et_al_2020
rs116015634	KCNQ4	ECG_traits_and_atrial_fibrilation	Verweij_et_al_2020
rs1707334	PIK3R3	ECG_traits_and_atrial_fibrilation	Verweij_et_al_2020
rs1707334	MAST2	ECG_traits_and_atrial_fibrilation	Verweij_et_al_2020
rs1707334	GPBP1L1	ECG_traits_and_atrial_fibrilation	Verweij_et_al_2020
rs112288630	EPS15	ECG_traits_and_atrial_fibrilation	Verweij_et_al_2020
rs590041	SSBP3	ECG_traits_and_atrial_fibrilation	Verweij_et_al_2020
rs985783	DAB1	ECG_traits_and_atrial_fibrilation	Verweij_et_al_2020
rs34370185	FGGY	ECG_traits_and_atrial_fibrilation	Verweij_et_al_2020
rs2474370	NFIA	ECG_traits_and_atrial_fibrilation	Verweij_et_al_2020
rs72677052	SGIP1	ECG_traits_and_atrial_fibrilation	Verweij_et_al_2020
rs6702939	GIPC2	ECG_traits_and_atrial_fibrilation	Verweij_et_al_2020
rs6702939	NEXN	ECG_traits_and_atrial_fibrilation	Verweij_et_al_2020
rs143221246	SNX7	ECG_traits_and_atrial_fibrilation	Verweij_et_al_2020
rs72681760	KCNA2	ECG_traits_and_atrial_fibrilation	Verweij_et_al_2020
rs584096	KCND3	ECG_traits_and_atrial_fibrilation	Verweij_et_al_2020
rs12142815	KCND3	ECG_traits_and_atrial_fibrilation	Verweij_et_al_2020
rs776293589	KCND3	ECG_traits_and_atrial_fibrilation	Verweij_et_al_2020
rs115286434	KCND3	ECG_traits_and_atrial_fibrilation	Verweij_et_al_2020
rs4073778	CASQ2	ECG_traits_and_atrial_fibrilation	Verweij_et_al_2020
rs12034347	WARS2	ECG_traits_and_atrial_fibrilation	Verweij_et_al_2020
rs553620963	ADAR	ECG_traits_and_atrial_fibrilation	Verweij_et_al_2020
rs1870940	ZBTB7B	ECG_traits_and_atrial_fibrilation	Verweij_et_al_2020
rs1870940	DCST2	ECG_traits_and_atrial_fibrilation	Verweij_et_al_2020
rs4745	EFNA1	ECG_traits_and_atrial_fibrilation	Verweij_et_al_2020
rs4745	SLC50A1	ECG_traits_and_atrial_fibrilation	Verweij_et_al_2020
rs4745	DPM3	ECG_traits_and_atrial_fibrilation	Verweij_et_al_2020
rs10908504	MEF2D	ECG_traits_and_atrial_fibrilation	Verweij_et_al_2020
rs10797060	ATP1A2	ECG_traits_and_atrial_fibrilation	Verweij_et_al_2020
rs12143842	NOS1AP	ECG_traits_and_atrial_fibrilation	Verweij_et_al_2020
rs12143842	OLFML2B	ECG_traits_and_atrial_fibrilation	Verweij_et_al_2020
rs59852339	NOS1AP	ECG_traits_and_atrial_fibrilation	Verweij_et_al_2020
rs59852339	OLFML2B	ECG_traits_and_atrial_fibrilation	Verweij_et_al_2020
rs116381680	NOS1AP	ECG_traits_and_atrial_fibrilation	Verweij_et_al_2020
rs116381680	OLFML2B	ECG_traits_and_atrial_fibrilation	Verweij_et_al_2020
rs10918192	RXRG	ECG_traits_and_atrial_fibrilation	Verweij_et_al_2020
rs11580561	XCL1	ECG_traits_and_atrial_fibrilation	Verweij_et_al_2020
rs531706	DPT	ECG_traits_and_atrial_fibrilation	Verweij_et_al_2020
rs12569204	ATP1B1	ECG_traits_and_atrial_fibrilation	Verweij_et_al_2020
rs1200130	ATP1B1	ECG_traits_and_atrial_fibrilation	Verweij_et_al_2020
rs67779898	NME7	ECG_traits_and_atrial_fibrilation	Verweij_et_al_2020
rs67779898	ATP1B1	ECG_traits_and_atrial_fibrilation	Verweij_et_al_2020
rs1591734	NME7	ECG_traits_and_atrial_fibrilation	Verweij_et_al_2020
rs1591734	ATP1B1	ECG_traits_and_atrial_fibrilation	Verweij_et_al_2020
rs57831591	GORAB	ECG_traits_and_atrial_fibrilation	Verweij_et_al_2020
rs76120745	GLUL	ECG_traits_and_atrial_fibrilation	Verweij_et_al_2020
rs575784488	GLUL	ECG_traits_and_atrial_fibrilation	Verweij_et_al_2020
rs1104859	TNNT2	ECG_traits_and_atrial_fibrilation	Verweij_et_al_2020
rs1104859	PKP1	ECG_traits_and_atrial_fibrilation	Verweij_et_al_2020
rs4951365	PLEKHA6	ECG_traits_and_atrial_fibrilation	Verweij_et_al_2020
rs863724	RAB7L1	ECG_traits_and_atrial_fibrilation	Verweij_et_al_2020
rs863724	SLC41A1	ECG_traits_and_atrial_fibrilation	Verweij_et_al_2020
rs35232605	CD46	ECG_traits_and_atrial_fibrilation	Verweij_et_al_2020
rs35232605	CD34	ECG_traits_and_atrial_fibrilation	Verweij_et_al_2020
rs568925773	INTS7	ECG_traits_and_atrial_fibrilation	Verweij_et_al_2020
rs340849	PROX1	ECG_traits_and_atrial_fibrilation	Verweij_et_al_2020
rs1532501	ESRRG	ECG_traits_and_atrial_fibrilation	Verweij_et_al_2020
rs115282653	LYPLAL1	ECG_traits_and_atrial_fibrilation	Verweij_et_al_2020
1:225664878_AAGAG_A	ENAH	ECG_traits_and_atrial_fibrilation	Verweij_et_al_2020
rs35937215	OBSCN	ECG_traits_and_atrial_fibrilation	Verweij_et_al_2020
rs12117603	SMYD3	ECG_traits_and_atrial_fibrilation	Verweij_et_al_2020
rs10193517	ID2	ECG_traits_and_atrial_fibrilation	Verweij_et_al_2020
rs6730558	ID2	ECG_traits_and_atrial_fibrilation	Verweij_et_al_2020
rs1047392	E2F6	ECG_traits_and_atrial_fibrilation	Verweij_et_al_2020
rs13020178	TRIB2	ECG_traits_and_atrial_fibrilation	Verweij_et_al_2020
rs1368888	DPYSL5	ECG_traits_and_atrial_fibrilation	Verweij_et_al_2020
rs1368888	MAPRE3	ECG_traits_and_atrial_fibrilation	Verweij_et_al_2020
rs56036545	CRIM1	ECG_traits_and_atrial_fibrilation	Verweij_et_al_2020
rs13026826	SLC8A1	ECG_traits_and_atrial_fibrilation	Verweij_et_al_2020
rs58470117	C2orf91	ECG_traits_and_atrial_fibrilation	Verweij_et_al_2020
rs2121266	EPAS1	ECG_traits_and_atrial_fibrilation	Verweij_et_al_2020
rs4671222	SPTBN1	ECG_traits_and_atrial_fibrilation	Verweij_et_al_2020
rs7609203	WDPCP	ECG_traits_and_atrial_fibrilation	Verweij_et_al_2020
rs7609203	EHBP1	ECG_traits_and_atrial_fibrilation	Verweij_et_al_2020
rs759664	SERTAD2	ECG_traits_and_atrial_fibrilation	Verweij_et_al_2020
rs11677371	MEIS1	ECG_traits_and_atrial_fibrilation	Verweij_et_al_2020
2:84085386_AGT_A	SUCLG1	ECG_traits_and_atrial_fibrilation	Verweij_et_al_2020
rs2732861	TMEM182	ECG_traits_and_atrial_fibrilation	Verweij_et_al_2020
rs17407658	ZEB2	ECG_traits_and_atrial_fibrilation	Verweij_et_al_2020
rs16860332	ITGA6	ECG_traits_and_atrial_fibrilation	Verweij_et_al_2020
rs115142950	OSBPL6	ECG_traits_and_atrial_fibrilation	Verweij_et_al_2020
rs16866397	TTN	ECG_traits_and_atrial_fibrilation	Verweij_et_al_2020
rs16866397	CCDC141	ECG_traits_and_atrial_fibrilation	Verweij_et_al_2020
rs955738	CCDC141	ECG_traits_and_atrial_fibrilation	Verweij_et_al_2020
rs955738	TTN	ECG_traits_and_atrial_fibrilation	Verweij_et_al_2020
rs11681740	COL3A1	ECG_traits_and_atrial_fibrilation	Verweij_et_al_2020
rs6735214	PLCL1	ECG_traits_and_atrial_fibrilation	Verweij_et_al_2020
rs7605146	SPATS2L	ECG_traits_and_atrial_fibrilation	Verweij_et_al_2020
2:213211032_GC_G	ERBB4	ECG_traits_and_atrial_fibrilation	Verweij_et_al_2020
rs907683	DES	ECG_traits_and_atrial_fibrilation	Verweij_et_al_2020
rs907683	SPEG	ECG_traits_and_atrial_fibrilation	Verweij_et_al_2020
rs907683	SLC4A3	ECG_traits_and_atrial_fibrilation	Verweij_et_al_2020
rs35394392	SLC4A3	ECG_traits_and_atrial_fibrilation	Verweij_et_al_2020
rs35394392	DES	ECG_traits_and_atrial_fibrilation	Verweij_et_al_2020
rs10165767	RHBDD1	ECG_traits_and_atrial_fibrilation	Verweij_et_al_2020
rs10165767	COL4A4	ECG_traits_and_atrial_fibrilation	Verweij_et_al_2020
rs2595508	B3GNT7	ECG_traits_and_atrial_fibrilation	Verweij_et_al_2020
rs141501074	USP40	ECG_traits_and_atrial_fibrilation	Verweij_et_al_2020
rs141501074	DGKD	ECG_traits_and_atrial_fibrilation	Verweij_et_al_2020
rs142536918	RAF1	ECG_traits_and_atrial_fibrilation	Verweij_et_al_2020
rs7650482	CAND2	ECG_traits_and_atrial_fibrilation	Verweij_et_al_2020
rs4685090	LSM3	ECG_traits_and_atrial_fibrilation	Verweij_et_al_2020
rs13092272	BTD	ECG_traits_and_atrial_fibrilation	Verweij_et_al_2020
rs13092272	ANKRD28	ECG_traits_and_atrial_fibrilation	Verweij_et_al_2020
rs13092272	COLQ	ECG_traits_and_atrial_fibrilation	Verweij_et_al_2020
rs760390566	THRB	ECG_traits_and_atrial_fibrilation	Verweij_et_al_2020
rs55644439	NEK10	ECG_traits_and_atrial_fibrilation	Verweij_et_al_2020
rs55644439	SLC4A7	ECG_traits_and_atrial_fibrilation	Verweij_et_al_2020
rs6772646	TRANK1	ECG_traits_and_atrial_fibrilation	Verweij_et_al_2020
rs62241772	EXOG	ECG_traits_and_atrial_fibrilation	Verweij_et_al_2020
rs62241772	SCN5A	ECG_traits_and_atrial_fibrilation	Verweij_et_al_2020
rs62241772	ACVR2B	ECG_traits_and_atrial_fibrilation	Verweij_et_al_2020
rs41312411	SCN5A	ECG_traits_and_atrial_fibrilation	Verweij_et_al_2020
rs41312411	ACVR2B	ECG_traits_and_atrial_fibrilation	Verweij_et_al_2020
rs572474770	SCN5A	ECG_traits_and_atrial_fibrilation	Verweij_et_al_2020
rs572474770	ACVR2B	ECG_traits_and_atrial_fibrilation	Verweij_et_al_2020
rs571037730	SCN5A	ECG_traits_and_atrial_fibrilation	Verweij_et_al_2020
rs76521806	SCN5A	ECG_traits_and_atrial_fibrilation	Verweij_et_al_2020
rs6801957	SCN10A	ECG_traits_and_atrial_fibrilation	Verweij_et_al_2020
rs11921457	TRAK1	ECG_traits_and_atrial_fibrilation	Verweij_et_al_2020
rs1986599	RBM6	ECG_traits_and_atrial_fibrilation	Verweij_et_al_2020
rs1986599	KLHDC8B	ECG_traits_and_atrial_fibrilation	Verweij_et_al_2020
rs1986599	DAG1	ECG_traits_and_atrial_fibrilation	Verweij_et_al_2020
rs1986599	LAMB2	ECG_traits_and_atrial_fibrilation	Verweij_et_al_2020
rs1986599	SEMA3F	ECG_traits_and_atrial_fibrilation	Verweij_et_al_2020
rs1986599	C3orf54	ECG_traits_and_atrial_fibrilation	Verweij_et_al_2020
rs1986599	TMEM115	ECG_traits_and_atrial_fibrilation	Verweij_et_al_2020
rs1986599	HYAL2	ECG_traits_and_atrial_fibrilation	Verweij_et_al_2020
rs1986599	C3orf45	ECG_traits_and_atrial_fibrilation	Verweij_et_al_2020
rs1986599	AMT	ECG_traits_and_atrial_fibrilation	Verweij_et_al_2020
rs1986599	GNAI2	ECG_traits_and_atrial_fibrilation	Verweij_et_al_2020
rs1986599	MST1R	ECG_traits_and_atrial_fibrilation	Verweij_et_al_2020
rs1986599	RHOA	ECG_traits_and_atrial_fibrilation	Verweij_et_al_2020
rs1986599	ARIH2	ECG_traits_and_atrial_fibrilation	Verweij_et_al_2020
rs113855341	SFMBT1	ECG_traits_and_atrial_fibrilation	Verweij_et_al_2020
rs113855341	ITIH4	ECG_traits_and_atrial_fibrilation	Verweij_et_al_2020
rs62256002	TKT	ECG_traits_and_atrial_fibrilation	Verweij_et_al_2020
rs6774470	ERC2	ECG_traits_and_atrial_fibrilation	Verweij_et_al_2020
rs332371	SLC25A26	ECG_traits_and_atrial_fibrilation	Verweij_et_al_2020
rs332371	LRIG1	ECG_traits_and_atrial_fibrilation	Verweij_et_al_2020
rs114564188	FOXP1	ECG_traits_and_atrial_fibrilation	Verweij_et_al_2020
rs4677137	RYBP	ECG_traits_and_atrial_fibrilation	Verweij_et_al_2020
rs766206762	PDZRN3	ECG_traits_and_atrial_fibrilation	Verweij_et_al_2020
rs72620089	CCDC54	ECG_traits_and_atrial_fibrilation	Verweij_et_al_2020
3:111574251_TCTTC_T	PLCXD2	ECG_traits_and_atrial_fibrilation	Verweij_et_al_2020
3:111574251_TCTTC_T	PHLDB2	ECG_traits_and_atrial_fibrilation	Verweij_et_al_2020
rs1254386	PTPLB	ECG_traits_and_atrial_fibrilation	Verweij_et_al_2020
rs1254386	MYLK	ECG_traits_and_atrial_fibrilation	Verweij_et_al_2020
rs1403767	PPP2R3A	ECG_traits_and_atrial_fibrilation	Verweij_et_al_2020
rs4683632	ATP1B3	ECG_traits_and_atrial_fibrilation	Verweij_et_al_2020
rs11923657	TSC22D2	ECG_traits_and_atrial_fibrilation	Verweij_et_al_2020
rs11928162	CCNL1	ECG_traits_and_atrial_fibrilation	Verweij_et_al_2020
rs759623919	SHOX2	ECG_traits_and_atrial_fibrilation	Verweij_et_al_2020
rs6441207	MLF1	ECG_traits_and_atrial_fibrilation	Verweij_et_al_2020
rs55853354	WDR49	ECG_traits_and_atrial_fibrilation	Verweij_et_al_2020
rs4894803	FNDC3B	ECG_traits_and_atrial_fibrilation	Verweij_et_al_2020
rs545261249	SENP2	ECG_traits_and_atrial_fibrilation	Verweij_et_al_2020
rs375818588	FETUB	ECG_traits_and_atrial_fibrilation	Verweij_et_al_2020
rs375818588	HRG	ECG_traits_and_atrial_fibrilation	Verweij_et_al_2020
rs1706003	TMEM44	ECG_traits_and_atrial_fibrilation	Verweij_et_al_2020
rs2292804	PROM1	ECG_traits_and_atrial_fibrilation	Verweij_et_al_2020
rs768695	PPARGC1A	ECG_traits_and_atrial_fibrilation	Verweij_et_al_2020
rs199745043	ARHGAP24	ECG_traits_and_atrial_fibrilation	Verweij_et_al_2020
rs60063444	PDLIM5	ECG_traits_and_atrial_fibrilation	Verweij_et_al_2020
rs1906599	PITX2	ECG_traits_and_atrial_fibrilation	Verweij_et_al_2020
rs6533694	CAMK2D	ECG_traits_and_atrial_fibrilation	Verweij_et_al_2020
rs139446049	NDST4	ECG_traits_and_atrial_fibrilation	Verweij_et_al_2020
rs61760320	NR3C2	ECG_traits_and_atrial_fibrilation	Verweij_et_al_2020
rs6846721	TRIM2	ECG_traits_and_atrial_fibrilation	Verweij_et_al_2020
4:155350842_GT_G	DCHS2	ECG_traits_and_atrial_fibrilation	Verweij_et_al_2020
rs13127767	RAPGEF2	ECG_traits_and_atrial_fibrilation	Verweij_et_al_2020
rs2062591	PALLD	ECG_traits_and_atrial_fibrilation	Verweij_et_al_2020
rs6824178	HAND2	ECG_traits_and_atrial_fibrilation	Verweij_et_al_2020
rs76383255	FBXO8	ECG_traits_and_atrial_fibrilation	Verweij_et_al_2020
rs2333469	SPCS3	ECG_traits_and_atrial_fibrilation	Verweij_et_al_2020
rs260399	IRX4	ECG_traits_and_atrial_fibrilation	Verweij_et_al_2020
rs3828591	NPR3	ECG_traits_and_atrial_fibrilation	Verweij_et_al_2020
rs111869282	MRPS30	ECG_traits_and_atrial_fibrilation	Verweij_et_al_2020
rs7714577	CWC27	ECG_traits_and_atrial_fibrilation	Verweij_et_al_2020
rs114419215	MAST4	ECG_traits_and_atrial_fibrilation	Verweij_et_al_2020
rs111778721	TBCA	ECG_traits_and_atrial_fibrilation	Verweij_et_al_2020
5:82594418_CT_C	XRCC4	ECG_traits_and_atrial_fibrilation	Verweij_et_al_2020
rs35658696	PAM	ECG_traits_and_atrial_fibrilation	Verweij_et_al_2020
rs35658696	PPIP5K2	ECG_traits_and_atrial_fibrilation	Verweij_et_al_2020
rs890924	YTHDC2	ECG_traits_and_atrial_fibrilation	Verweij_et_al_2020
rs335214	PRDM6	ECG_traits_and_atrial_fibrilation	Verweij_et_al_2020
5:132428677_ATT_A	HSPA4	ECG_traits_and_atrial_fibrilation	Verweij_et_al_2020
rs1476096	JADE2	ECG_traits_and_atrial_fibrilation	Verweij_et_al_2020
rs11748963	SLC23A1	ECG_traits_and_atrial_fibrilation	Verweij_et_al_2020
rs11748963	MZB1	ECG_traits_and_atrial_fibrilation	Verweij_et_al_2020
rs11748963	PROB1	ECG_traits_and_atrial_fibrilation	Verweij_et_al_2020
rs11748963	SPATA24	ECG_traits_and_atrial_fibrilation	Verweij_et_al_2020
rs11748963	ECSCR	ECG_traits_and_atrial_fibrilation	Verweij_et_al_2020
5:145398089_ACAC_A	SH3RF2	ECG_traits_and_atrial_fibrilation	Verweij_et_al_2020
5:145398089_ACAC_A	PPP1R39	ECG_traits_and_atrial_fibrilation	Verweij_et_al_2020
rs34289553	ABLIM3	ECG_traits_and_atrial_fibrilation	Verweij_et_al_2020
rs10054375	HAND1	ECG_traits_and_atrial_fibrilation	Verweij_et_al_2020
rs10076602	HAND1	ECG_traits_and_atrial_fibrilation	Verweij_et_al_2020
rs763696876	EBF1	ECG_traits_and_atrial_fibrilation	Verweij_et_al_2020
rs11745586	SH3PXD2B	ECG_traits_and_atrial_fibrilation	Verweij_et_al_2020
rs12652726	NKX2-5	ECG_traits_and_atrial_fibrilation	Verweij_et_al_2020
rs61367953	PSMG4	ECG_traits_and_atrial_fibrilation	Verweij_et_al_2020
rs61367953	SLC22A23	ECG_traits_and_atrial_fibrilation	Verweij_et_al_2020
rs9502009	SLC22A23	ECG_traits_and_atrial_fibrilation	Verweij_et_al_2020
rs72825038	DSP	ECG_traits_and_atrial_fibrilation	Verweij_et_al_2020
rs775204216	ADTRP	ECG_traits_and_atrial_fibrilation	Verweij_et_al_2020
rs547691407	PHACTR1	ECG_traits_and_atrial_fibrilation	Verweij_et_al_2020
rs9396858	RNF144B	ECG_traits_and_atrial_fibrilation	Verweij_et_al_2020
rs78144291	MBOAT1	ECG_traits_and_atrial_fibrilation	Verweij_et_al_2020
rs13211463	HDGFL1	ECG_traits_and_atrial_fibrilation	Verweij_et_al_2020
rs9467373	FAM65B	ECG_traits_and_atrial_fibrilation	Verweij_et_al_2020
rs301395	LRRC16A	ECG_traits_and_atrial_fibrilation	Verweij_et_al_2020
rs772081778	HLA-DQA1	ECG_traits_and_atrial_fibrilation	Verweij_et_al_2020
rs3130582	HLA-DPA1	ECG_traits_and_atrial_fibrilation	Verweij_et_al_2020
rs730506	CDKN1A	ECG_traits_and_atrial_fibrilation	Verweij_et_al_2020
rs730506	PI16	ECG_traits_and_atrial_fibrilation	Verweij_et_al_2020
rs533119559	EPHA7	ECG_traits_and_atrial_fibrilation	Verweij_et_al_2020
rs4478445	PREP	ECG_traits_and_atrial_fibrilation	Verweij_et_al_2020
rs28763977	FYN	ECG_traits_and_atrial_fibrilation	Verweij_et_al_2020
rs59365541	VGLL2	ECG_traits_and_atrial_fibrilation	Verweij_et_al_2020
rs210977	VGLL2	ECG_traits_and_atrial_fibrilation	Verweij_et_al_2020
rs663474	ROS1	ECG_traits_and_atrial_fibrilation	Verweij_et_al_2020
rs663474	GOPC	ECG_traits_and_atrial_fibrilation	Verweij_et_al_2020
rs663474	VGLL2	ECG_traits_and_atrial_fibrilation	Verweij_et_al_2020
rs376054711	SLC35F1	ECG_traits_and_atrial_fibrilation	Verweij_et_al_2020
rs376054711	PLN	ECG_traits_and_atrial_fibrilation	Verweij_et_al_2020
rs11153730	SLC35F1	ECG_traits_and_atrial_fibrilation	Verweij_et_al_2020
rs11153730	PLN	ECG_traits_and_atrial_fibrilation	Verweij_et_al_2020
rs12212870	FAM184A	ECG_traits_and_atrial_fibrilation	Verweij_et_al_2020
rs12212870	PLN	ECG_traits_and_atrial_fibrilation	Verweij_et_al_2020
rs28581202	GJA1	ECG_traits_and_atrial_fibrilation	Verweij_et_al_2020
6:122113614_CT_C	GJA1	ECG_traits_and_atrial_fibrilation	Verweij_et_al_2020
rs12209641	TRDN	ECG_traits_and_atrial_fibrilation	Verweij_et_al_2020
rs6940945	HDDC2	ECG_traits_and_atrial_fibrilation	Verweij_et_al_2020
rs10457469	HEY2	ECG_traits_and_atrial_fibrilation	Verweij_et_al_2020
rs11961815	RSPO3	ECG_traits_and_atrial_fibrilation	Verweij_et_al_2020
rs378273	RPS12	ECG_traits_and_atrial_fibrilation	Verweij_et_al_2020
rs573680085	SGK1	ECG_traits_and_atrial_fibrilation	Verweij_et_al_2020
rs77170649	ALDH8A1	ECG_traits_and_atrial_fibrilation	Verweij_et_al_2020
rs6570952	TAB2	ECG_traits_and_atrial_fibrilation	Verweij_et_al_2020
rs13208950	CCDC170	ECG_traits_and_atrial_fibrilation	Verweij_et_al_2020
rs6914036	FNDC1	ECG_traits_and_atrial_fibrilation	Verweij_et_al_2020
rs10464373	RADIL	ECG_traits_and_atrial_fibrilation	Verweij_et_al_2020
rs10464373	PAPOLB	ECG_traits_and_atrial_fibrilation	Verweij_et_al_2020
rs6461703	GPNMB	ECG_traits_and_atrial_fibrilation	Verweij_et_al_2020
rs6461703	AK3P3	ECG_traits_and_atrial_fibrilation	Verweij_et_al_2020
rs6461703	IGF2BP3	ECG_traits_and_atrial_fibrilation	Verweij_et_al_2020
rs6461703	KLHL7	ECG_traits_and_atrial_fibrilation	Verweij_et_al_2020
7:35281105_TG_T	TBX20	ECG_traits_and_atrial_fibrilation	Verweij_et_al_2020
rs11764098	HERPUD2	ECG_traits_and_atrial_fibrilation	Verweij_et_al_2020
rs343057	HERPUD2	ECG_traits_and_atrial_fibrilation	Verweij_et_al_2020
rs372543528	PTPN12	ECG_traits_and_atrial_fibrilation	Verweij_et_al_2020
rs372543528	RSBN1L	ECG_traits_and_atrial_fibrilation	Verweij_et_al_2020
rs372543528	PHTF2	ECG_traits_and_atrial_fibrilation	Verweij_et_al_2020
rs74524365	CD36	ECG_traits_and_atrial_fibrilation	Verweij_et_al_2020
rs11771799	PILRB	ECG_traits_and_atrial_fibrilation	Verweij_et_al_2020
rs11771799	PILRA	ECG_traits_and_atrial_fibrilation	Verweij_et_al_2020
rs13245899	UFSP1	ECG_traits_and_atrial_fibrilation	Verweij_et_al_2020
rs13245899	ACHE	ECG_traits_and_atrial_fibrilation	Verweij_et_al_2020
rs13245899	EPHB4	ECG_traits_and_atrial_fibrilation	Verweij_et_al_2020
rs13245899	TRIP6	ECG_traits_and_atrial_fibrilation	Verweij_et_al_2020
rs13245899	MUC3A	ECG_traits_and_atrial_fibrilation	Verweij_et_al_2020
rs2520258	COG5	ECG_traits_and_atrial_fibrilation	Verweij_et_al_2020
rs2520258	HBP1	ECG_traits_and_atrial_fibrilation	Verweij_et_al_2020
rs2520258	GPR22	ECG_traits_and_atrial_fibrilation	Verweij_et_al_2020
rs3128384	IFRD1	ECG_traits_and_atrial_fibrilation	Verweij_et_al_2020
rs3128384	LSMEM1	ECG_traits_and_atrial_fibrilation	Verweij_et_al_2020
rs3128384	C7orf53	ECG_traits_and_atrial_fibrilation	Verweij_et_al_2020
rs1997571	CAV1	ECG_traits_and_atrial_fibrilation	Verweij_et_al_2020
7:116890450_AT_A	ST7	ECG_traits_and_atrial_fibrilation	Verweij_et_al_2020
rs56216811	CCDC136	ECG_traits_and_atrial_fibrilation	Verweij_et_al_2020
rs56216811	FLNC	ECG_traits_and_atrial_fibrilation	Verweij_et_al_2020
rs35680304	MKLN1	ECG_traits_and_atrial_fibrilation	Verweij_et_al_2020
rs117104597	CNTNAP2	ECG_traits_and_atrial_fibrilation	Verweij_et_al_2020
rs55851300	KCNH2	ECG_traits_and_atrial_fibrilation	Verweij_et_al_2020
rs143016484	SHH	ECG_traits_and_atrial_fibrilation	Verweij_et_al_2020
rs4517166	KBTBD11	ECG_traits_and_atrial_fibrilation	Verweij_et_al_2020
8:5828558_GGA_G	MCPH1	ECG_traits_and_atrial_fibrilation	Verweij_et_al_2020
rs7820146	MFHAS1	ECG_traits_and_atrial_fibrilation	Verweij_et_al_2020
rs7820146	PPP1R3B	ECG_traits_and_atrial_fibrilation	Verweij_et_al_2020
rs73195040	DEFB136	ECG_traits_and_atrial_fibrilation	Verweij_et_al_2020
rs61494024	DOK2	ECG_traits_and_atrial_fibrilation	Verweij_et_al_2020
rs61494024	XPO7	ECG_traits_and_atrial_fibrilation	Verweij_et_al_2020
rs62505473	FGFR1	ECG_traits_and_atrial_fibrilation	Verweij_et_al_2020
rs7833518	SFRP1	ECG_traits_and_atrial_fibrilation	Verweij_et_al_2020
rs571690420	C8orf44-SGK3	ECG_traits_and_atrial_fibrilation	Verweij_et_al_2020
rs571690420	SGK3	ECG_traits_and_atrial_fibrilation	Verweij_et_al_2020
rs11776287	NCOA2	ECG_traits_and_atrial_fibrilation	Verweij_et_al_2020
rs1562986	MRPS28	ECG_traits_and_atrial_fibrilation	Verweij_et_al_2020
rs1562986	TPD52	ECG_traits_and_atrial_fibrilation	Verweij_et_al_2020
rs2445704	CDH17	ECG_traits_and_atrial_fibrilation	Verweij_et_al_2020
rs72671655	ZFPM2	ECG_traits_and_atrial_fibrilation	Verweij_et_al_2020
rs147543128	ZFPM2	ECG_traits_and_atrial_fibrilation	Verweij_et_al_2020
rs1461990	ANGPT1	ECG_traits_and_atrial_fibrilation	Verweij_et_al_2020
rs16898508	FBXO32	ECG_traits_and_atrial_fibrilation	Verweij_et_al_2020
rs4871397	KLHL38	ECG_traits_and_atrial_fibrilation	Verweij_et_al_2020
rs72711245	KLHL38	ECG_traits_and_atrial_fibrilation	Verweij_et_al_2020
rs34866937	MTSS1	ECG_traits_and_atrial_fibrilation	Verweij_et_al_2020
rs13264524	AGO2	ECG_traits_and_atrial_fibrilation	Verweij_et_al_2020
rs13264524	EIF2C2	ECG_traits_and_atrial_fibrilation	Verweij_et_al_2020
rs13264524	PTK2	ECG_traits_and_atrial_fibrilation	Verweij_et_al_2020
rs11784619	PLEC	ECG_traits_and_atrial_fibrilation	Verweij_et_al_2020
9:33272391_CA_C	BAG1	ECG_traits_and_atrial_fibrilation	Verweij_et_al_2020
9:33272391_CA_C	CHMP5	ECG_traits_and_atrial_fibrilation	Verweij_et_al_2020
rs770250170	UBE2R2	ECG_traits_and_atrial_fibrilation	Verweij_et_al_2020
rs748802	HRCT1	ECG_traits_and_atrial_fibrilation	Verweij_et_al_2020
rs1415221	TRPM3	ECG_traits_and_atrial_fibrilation	Verweij_et_al_2020
rs34382015	GNAQ	ECG_traits_and_atrial_fibrilation	Verweij_et_al_2020
rs10119967	CDC14B	ECG_traits_and_atrial_fibrilation	Verweij_et_al_2020
rs10119967	HABP4	ECG_traits_and_atrial_fibrilation	Verweij_et_al_2020
rs74552897	ZNF462	ECG_traits_and_atrial_fibrilation	Verweij_et_al_2020
rs7866966	TMEM245	ECG_traits_and_atrial_fibrilation	Verweij_et_al_2020
rs7866966	C9orf5	ECG_traits_and_atrial_fibrilation	Verweij_et_al_2020
rs7866966	CTNNAL1	ECG_traits_and_atrial_fibrilation	Verweij_et_al_2020
rs7866966	PTPN3	ECG_traits_and_atrial_fibrilation	Verweij_et_al_2020
rs7030930	PTPN3	ECG_traits_and_atrial_fibrilation	Verweij_et_al_2020
rs7030930	C9orf5	ECG_traits_and_atrial_fibrilation	Verweij_et_al_2020
rs7030930	CTNNAL1	ECG_traits_and_atrial_fibrilation	Verweij_et_al_2020
rs10980770	LPAR1	ECG_traits_and_atrial_fibrilation	Verweij_et_al_2020
rs7850041	PPAPDC3	ECG_traits_and_atrial_fibrilation	Verweij_et_al_2020
rs12001868	DBH	ECG_traits_and_atrial_fibrilation	Verweij_et_al_2020
rs11257655	CDC123	ECG_traits_and_atrial_fibrilation	Verweij_et_al_2020
rs72786007	CACNB2	ECG_traits_and_atrial_fibrilation	Verweij_et_al_2020
rs788076	C10orf126	ECG_traits_and_atrial_fibrilation	Verweij_et_al_2020
rs12779954	KIAA1462	ECG_traits_and_atrial_fibrilation	Verweij_et_al_2020
rs211315	KIF5B	ECG_traits_and_atrial_fibrilation	Verweij_et_al_2020
rs12777211	LINC00999	ECG_traits_and_atrial_fibrilation	Verweij_et_al_2020
rs1733724	DKK1	ECG_traits_and_atrial_fibrilation	Verweij_et_al_2020
rs10740131	REEP3	ECG_traits_and_atrial_fibrilation	Verweij_et_al_2020
rs10740131	JMJD1C	ECG_traits_and_atrial_fibrilation	Verweij_et_al_2020
rs1037985	CTNNA3	ECG_traits_and_atrial_fibrilation	Verweij_et_al_2020
10:73832438_CCT_C	SPOCK2	ECG_traits_and_atrial_fibrilation	Verweij_et_al_2020
rs2177843	MYOZ1	ECG_traits_and_atrial_fibrilation	Verweij_et_al_2020
rs2177843	SYNPO2L	ECG_traits_and_atrial_fibrilation	Verweij_et_al_2020
rs2177843	KIAA0913	ECG_traits_and_atrial_fibrilation	Verweij_et_al_2020
rs6480713	VCL	ECG_traits_and_atrial_fibrilation	Verweij_et_al_2020
rs80341670	KAT6B	ECG_traits_and_atrial_fibrilation	Verweij_et_al_2020
rs1658323	ZMIZ1	ECG_traits_and_atrial_fibrilation	Verweij_et_al_2020
rs1769758	ZMIZ1	ECG_traits_and_atrial_fibrilation	Verweij_et_al_2020
rs3802662	LDB3	ECG_traits_and_atrial_fibrilation	Verweij_et_al_2020
rs117524646	SLC16A12	ECG_traits_and_atrial_fibrilation	Verweij_et_al_2020
rs10736059	ANKRD1	ECG_traits_and_atrial_fibrilation	Verweij_et_al_2020
rs117929802	EXOC6	ECG_traits_and_atrial_fibrilation	Verweij_et_al_2020
rs117929802	CYP26C1	ECG_traits_and_atrial_fibrilation	Verweij_et_al_2020
rs117929802	CYP26A1	ECG_traits_and_atrial_fibrilation	Verweij_et_al_2020
rs11187838	PLCE1	ECG_traits_and_atrial_fibrilation	Verweij_et_al_2020
rs10882661	ENTPD1	ECG_traits_and_atrial_fibrilation	Verweij_et_al_2020
rs11189038	ARHGAP19-SLIT1	ECG_traits_and_atrial_fibrilation	Verweij_et_al_2020
rs11189038	ARHGAP19	ECG_traits_and_atrial_fibrilation	Verweij_et_al_2020
rs72845807	SUFU	ECG_traits_and_atrial_fibrilation	Verweij_et_al_2020
rs72845807	TRIM8	ECG_traits_and_atrial_fibrilation	Verweij_et_al_2020
rs12257568	SH3PXD2A	ECG_traits_and_atrial_fibrilation	Verweij_et_al_2020
rs1977821	OBFC1	ECG_traits_and_atrial_fibrilation	Verweij_et_al_2020
rs10787270	RBM20	ECG_traits_and_atrial_fibrilation	Verweij_et_al_2020
rs770537744	RBM20	ECG_traits_and_atrial_fibrilation	Verweij_et_al_2020
rs7918405	VTI1A	ECG_traits_and_atrial_fibrilation	Verweij_et_al_2020
rs740746	ADRB1	ECG_traits_and_atrial_fibrilation	Verweij_et_al_2020
rs2234962	BAG3	ECG_traits_and_atrial_fibrilation	Verweij_et_al_2020
rs1078806	FGFR2	ECG_traits_and_atrial_fibrilation	Verweij_et_al_2020
rs2074238	KCNQ1	ECG_traits_and_atrial_fibrilation	Verweij_et_al_2020
rs117236107	KCNQ1	ECG_traits_and_atrial_fibrilation	Verweij_et_al_2020
rs2625322	NAV2	ECG_traits_and_atrial_fibrilation	Verweij_et_al_2020
rs7118294	WT1	ECG_traits_and_atrial_fibrilation	Verweij_et_al_2020
rs3729989	MYBPC3	ECG_traits_and_atrial_fibrilation	Verweij_et_al_2020
rs3729989	SPI1	ECG_traits_and_atrial_fibrilation	Verweij_et_al_2020
rs3729989	MADD	ECG_traits_and_atrial_fibrilation	Verweij_et_al_2020
rs3729989	RAPSN	ECG_traits_and_atrial_fibrilation	Verweij_et_al_2020
rs3729989	CELF1	ECG_traits_and_atrial_fibrilation	Verweij_et_al_2020
rs3729989	SLC39A13	ECG_traits_and_atrial_fibrilation	Verweij_et_al_2020
rs7479922	ZDHHC5	ECG_traits_and_atrial_fibrilation	Verweij_et_al_2020
rs7479922	MED19	ECG_traits_and_atrial_fibrilation	Verweij_et_al_2020
rs7479922	TMX2	ECG_traits_and_atrial_fibrilation	Verweij_et_al_2020
rs7479922	TMX2-CTNND1	ECG_traits_and_atrial_fibrilation	Verweij_et_al_2020
rs7479922	CTNND1	ECG_traits_and_atrial_fibrilation	Verweij_et_al_2020
11:60533354_CA_C	MS4A15	ECG_traits_and_atrial_fibrilation	Verweij_et_al_2020
11:60533354_CA_C	GPR44	ECG_traits_and_atrial_fibrilation	Verweij_et_al_2020
rs174536	MYRF	ECG_traits_and_atrial_fibrilation	Verweij_et_al_2020
rs174536	TMEM258	ECG_traits_and_atrial_fibrilation	Verweij_et_al_2020
rs174536	FEN1	ECG_traits_and_atrial_fibrilation	Verweij_et_al_2020
rs174536	FADS2	ECG_traits_and_atrial_fibrilation	Verweij_et_al_2020
rs174536	C11orf9	ECG_traits_and_atrial_fibrilation	Verweij_et_al_2020
rs36085849	SCYL1	ECG_traits_and_atrial_fibrilation	Verweij_et_al_2020
rs36085849	EHBP1L1	ECG_traits_and_atrial_fibrilation	Verweij_et_al_2020
rs36085849	LTBP3	ECG_traits_and_atrial_fibrilation	Verweij_et_al_2020
rs36085849	MAP3K11	ECG_traits_and_atrial_fibrilation	Verweij_et_al_2020
rs638138	CLPB	ECG_traits_and_atrial_fibrilation	Verweij_et_al_2020
rs777300465	CHRDL2	ECG_traits_and_atrial_fibrilation	Verweij_et_al_2020
11:75923599_CA_C	WNT11	ECG_traits_and_atrial_fibrilation	Verweij_et_al_2020
rs10898646	TMEM135	ECG_traits_and_atrial_fibrilation	Verweij_et_al_2020
11:95034279_TA_T	SESN3	ECG_traits_and_atrial_fibrilation	Verweij_et_al_2020
rs671333	ARHGAP42	ECG_traits_and_atrial_fibrilation	Verweij_et_al_2020
rs4935884	OR8B8	ECG_traits_and_atrial_fibrilation	Verweij_et_al_2020
rs11220270	HYLS1	ECG_traits_and_atrial_fibrilation	Verweij_et_al_2020
rs11220270	PUS3	ECG_traits_and_atrial_fibrilation	Verweij_et_al_2020
rs11220270	DDX25	ECG_traits_and_atrial_fibrilation	Verweij_et_al_2020
rs11221500	KCNJ5	ECG_traits_and_atrial_fibrilation	Verweij_et_al_2020
rs11221500	C11orf45	ECG_traits_and_atrial_fibrilation	Verweij_et_al_2020
12:1633920_TGGG_T	WNT5B	ECG_traits_and_atrial_fibrilation	Verweij_et_al_2020
rs11062103	CACNA1C	ECG_traits_and_atrial_fibrilation	Verweij_et_al_2020
rs11609729	CACNA1C	ECG_traits_and_atrial_fibrilation	Verweij_et_al_2020
rs1051375	CACNA1C	ECG_traits_and_atrial_fibrilation	Verweij_et_al_2020
rs10849144	GALNT8	ECG_traits_and_atrial_fibrilation	Verweij_et_al_2020
rs7307613	BCAT1	ECG_traits_and_atrial_fibrilation	Verweij_et_al_2020
rs34219605	BCAT1	ECG_traits_and_atrial_fibrilation	Verweij_et_al_2020
rs11049136	MANSC4	ECG_traits_and_atrial_fibrilation	Verweij_et_al_2020
rs11049136	KLHL42	ECG_traits_and_atrial_fibrilation	Verweij_et_al_2020
rs11049136	KLHDC5	ECG_traits_and_atrial_fibrilation	Verweij_et_al_2020
12:31620079_AG_A	DENND5B	ECG_traits_and_atrial_fibrilation	Verweij_et_al_2020
rs7315695	SYT10	ECG_traits_and_atrial_fibrilation	Verweij_et_al_2020
rs148885520	SLC38A2	ECG_traits_and_atrial_fibrilation	Verweij_et_al_2020
12:51197281_TA_T	ATF1	ECG_traits_and_atrial_fibrilation	Verweij_et_al_2020
12:51197281_TA_T	FAM186A	ECG_traits_and_atrial_fibrilation	Verweij_et_al_2020
12:51197281_TA_T	LIMA1	ECG_traits_and_atrial_fibrilation	Verweij_et_al_2020
rs113671070	EIF4B	ECG_traits_and_atrial_fibrilation	Verweij_et_al_2020
rs113671070	TENC1	ECG_traits_and_atrial_fibrilation	Verweij_et_al_2020
12:57156410_AAAAC_A	HSD17B6	ECG_traits_and_atrial_fibrilation	Verweij_et_al_2020
12:57156410_AAAAC_A	NACA	ECG_traits_and_atrial_fibrilation	Verweij_et_al_2020
12:57156410_AAAAC_A	RBMS2	ECG_traits_and_atrial_fibrilation	Verweij_et_al_2020
12:57156410_AAAAC_A	ATP5B	ECG_traits_and_atrial_fibrilation	Verweij_et_al_2020
12:57156410_AAAAC_A	BAZ2A	ECG_traits_and_atrial_fibrilation	Verweij_et_al_2020
rs1149003	ZFC3H1	ECG_traits_and_atrial_fibrilation	Verweij_et_al_2020
rs1149003	LGR5	ECG_traits_and_atrial_fibrilation	Verweij_et_al_2020
12:110625059_GTTGTTT_G	IFT81	ECG_traits_and_atrial_fibrilation	Verweij_et_al_2020
12:110625059_GTTGTTT_G	ATP2A2	ECG_traits_and_atrial_fibrilation	Verweij_et_al_2020
12:110625059_GTTGTTT_G	ANKRD13A	ECG_traits_and_atrial_fibrilation	Verweij_et_al_2020
rs141066394	RBM19	ECG_traits_and_atrial_fibrilation	Verweij_et_al_2020
rs722726	RBM19	ECG_traits_and_atrial_fibrilation	Verweij_et_al_2020
rs883079	TBX5	ECG_traits_and_atrial_fibrilation	Verweij_et_al_2020
rs61931005	TBX5	ECG_traits_and_atrial_fibrilation	Verweij_et_al_2020
rs188348223	TBX3	ECG_traits_and_atrial_fibrilation	Verweij_et_al_2020
rs11067264	TBX3	ECG_traits_and_atrial_fibrilation	Verweij_et_al_2020
rs7132327	TBX3	ECG_traits_and_atrial_fibrilation	Verweij_et_al_2020
rs142576422	TBX3	ECG_traits_and_atrial_fibrilation	Verweij_et_al_2020
rs373465055	COQ5	ECG_traits_and_atrial_fibrilation	Verweij_et_al_2020
rs373465055	RNF10	ECG_traits_and_atrial_fibrilation	Verweij_et_al_2020
rs7317804	IL17D	ECG_traits_and_atrial_fibrilation	Verweij_et_al_2020
rs7317804	N6AMT2	ECG_traits_and_atrial_fibrilation	Verweij_et_al_2020
rs11616720	MICU2	ECG_traits_and_atrial_fibrilation	Verweij_et_al_2020
rs11616720	EFHA1	ECG_traits_and_atrial_fibrilation	Verweij_et_al_2020
rs7993628	LRCH1	ECG_traits_and_atrial_fibrilation	Verweij_et_al_2020
13:49534769_CT_C	FNDC3A	ECG_traits_and_atrial_fibrilation	Verweij_et_al_2020
rs1965800	DLEU1	ECG_traits_and_atrial_fibrilation	Verweij_et_al_2020
rs1886512	KLF12	ECG_traits_and_atrial_fibrilation	Verweij_et_al_2020
rs2769884	FAM155A	ECG_traits_and_atrial_fibrilation	Verweij_et_al_2020
rs111403728	TMCO3	ECG_traits_and_atrial_fibrilation	Verweij_et_al_2020
rs111403728	DCUN1D2	ECG_traits_and_atrial_fibrilation	Verweij_et_al_2020
rs6571769	RPGRIP1	ECG_traits_and_atrial_fibrilation	Verweij_et_al_2020
rs6571769	SUPT16H	ECG_traits_and_atrial_fibrilation	Verweij_et_al_2020
rs365990	MYH6	ECG_traits_and_atrial_fibrilation	Verweij_et_al_2020
rs365990	MYH7	ECG_traits_and_atrial_fibrilation	Verweij_et_al_2020
14:23929566_AT_A	NGDN	ECG_traits_and_atrial_fibrilation	Verweij_et_al_2020
rs562161427	DACT1	ECG_traits_and_atrial_fibrilation	Verweij_et_al_2020
rs2108706	SIPA1L1	ECG_traits_and_atrial_fibrilation	Verweij_et_al_2020
rs17180489	RGS6	ECG_traits_and_atrial_fibrilation	Verweij_et_al_2020
rs12880339	FLRT2	ECG_traits_and_atrial_fibrilation	Verweij_et_al_2020
rs11626401	FOXN3	ECG_traits_and_atrial_fibrilation	Verweij_et_al_2020
14:96872394_AT_A	AK7	ECG_traits_and_atrial_fibrilation	Verweij_et_al_2020
rs34509141	C15orf41	ECG_traits_and_atrial_fibrilation	Verweij_et_al_2020
rs78496852	CASC4	ECG_traits_and_atrial_fibrilation	Verweij_et_al_2020
rs3131560	USP8	ECG_traits_and_atrial_fibrilation	Verweij_et_al_2020
rs3131560	TRPM7	ECG_traits_and_atrial_fibrilation	Verweij_et_al_2020
rs74018128	USP3	ECG_traits_and_atrial_fibrilation	Verweij_et_al_2020
rs74018128	FBXL22	ECG_traits_and_atrial_fibrilation	Verweij_et_al_2020
rs74018128	HERC1	ECG_traits_and_atrial_fibrilation	Verweij_et_al_2020
rs7496259	RBPMS2	ECG_traits_and_atrial_fibrilation	Verweij_et_al_2020
rs2019185	CILP	ECG_traits_and_atrial_fibrilation	Verweij_et_al_2020
rs3825977	SMAD3	ECG_traits_and_atrial_fibrilation	Verweij_et_al_2020
rs4777245	TLE3	ECG_traits_and_atrial_fibrilation	Verweij_et_al_2020
rs7164883	HCN4	ECG_traits_and_atrial_fibrilation	Verweij_et_al_2020
15:75187470_CT_C	MPI	ECG_traits_and_atrial_fibrilation	Verweij_et_al_2020
15:75187470_CT_C	FAM219B	ECG_traits_and_atrial_fibrilation	Verweij_et_al_2020
15:75187470_CT_C	LMAN1L	ECG_traits_and_atrial_fibrilation	Verweij_et_al_2020
15:75187470_CT_C	COX5A	ECG_traits_and_atrial_fibrilation	Verweij_et_al_2020
15:75187470_CT_C	RPP25	ECG_traits_and_atrial_fibrilation	Verweij_et_al_2020
rs200201338	KIAA1199	ECG_traits_and_atrial_fibrilation	Verweij_et_al_2020
rs200201338	MESDC2	ECG_traits_and_atrial_fibrilation	Verweij_et_al_2020
rs12595786	ZNF592	ECG_traits_and_atrial_fibrilation	Verweij_et_al_2020
rs12595786	ALPK3	ECG_traits_and_atrial_fibrilation	Verweij_et_al_2020
rs12595786	ZSCAN2	ECG_traits_and_atrial_fibrilation	Verweij_et_al_2020
rs28513927	MESP1	ECG_traits_and_atrial_fibrilation	Verweij_et_al_2020
rs28513927	MESP2	ECG_traits_and_atrial_fibrilation	Verweij_et_al_2020
rs28513927	ANPEP	ECG_traits_and_atrial_fibrilation	Verweij_et_al_2020
15:94705104_GTGTA_G	MCTP2	ECG_traits_and_atrial_fibrilation	Verweij_et_al_2020
rs4966020	IGF1R	ECG_traits_and_atrial_fibrilation	Verweij_et_al_2020
rs1045716	WDR90	ECG_traits_and_atrial_fibrilation	Verweij_et_al_2020
rs1045716	RHOT2	ECG_traits_and_atrial_fibrilation	Verweij_et_al_2020
rs1045716	RHBDL1	ECG_traits_and_atrial_fibrilation	Verweij_et_al_2020
rs1045716	STUB1	ECG_traits_and_atrial_fibrilation	Verweij_et_al_2020
rs1045716	JMJD8	ECG_traits_and_atrial_fibrilation	Verweij_et_al_2020
rs1045716	FAM195A	ECG_traits_and_atrial_fibrilation	Verweij_et_al_2020
rs6600238	LMF1	ECG_traits_and_atrial_fibrilation	Verweij_et_al_2020
rs12924536	RPL3L	ECG_traits_and_atrial_fibrilation	Verweij_et_al_2020
rs12924536	NDUFB10	ECG_traits_and_atrial_fibrilation	Verweij_et_al_2020
rs12924536	RPS2	ECG_traits_and_atrial_fibrilation	Verweij_et_al_2020
rs12924536	RNF151	ECG_traits_and_atrial_fibrilation	Verweij_et_al_2020
rs735052	SRL	ECG_traits_and_atrial_fibrilation	Verweij_et_al_2020
rs735052	TFAP4	ECG_traits_and_atrial_fibrilation	Verweij_et_al_2020
rs2080512	LITAF	ECG_traits_and_atrial_fibrilation	Verweij_et_al_2020
rs1344533	LITAF	ECG_traits_and_atrial_fibrilation	Verweij_et_al_2020
rs30226	MKL2	ECG_traits_and_atrial_fibrilation	Verweij_et_al_2020
rs3915425	MYH11	ECG_traits_and_atrial_fibrilation	Verweij_et_al_2020
rs12448482	ATXN2L	ECG_traits_and_atrial_fibrilation	Verweij_et_al_2020
rs12448482	ATP2A1	ECG_traits_and_atrial_fibrilation	Verweij_et_al_2020
rs12448482	SH2B1	ECG_traits_and_atrial_fibrilation	Verweij_et_al_2020
rs4238961	TBC1D10B	ECG_traits_and_atrial_fibrilation	Verweij_et_al_2020
rs4238961	MYLPF	ECG_traits_and_atrial_fibrilation	Verweij_et_al_2020
rs4238961	ZNF48	ECG_traits_and_atrial_fibrilation	Verweij_et_al_2020
rs4238961	SEPT1ù	ECG_traits_and_atrial_fibrilation	Verweij_et_al_2020
rs143721880	MMP15	ECG_traits_and_atrial_fibrilation	Verweij_et_al_2020
rs4784939	GINS3	ECG_traits_and_atrial_fibrilation	Verweij_et_al_2020
rs150728296	NDRG4	ECG_traits_and_atrial_fibrilation	Verweij_et_al_2020
rs150728296	SETD6	ECG_traits_and_atrial_fibrilation	Verweij_et_al_2020
rs150728296	CNOT1	ECG_traits_and_atrial_fibrilation	Verweij_et_al_2020
rs62044987	CDH11	ECG_traits_and_atrial_fibrilation	Verweij_et_al_2020
rs72791317	TERF2IP	ECG_traits_and_atrial_fibrilation	Verweij_et_al_2020
rs35559328	ADAMTS18	ECG_traits_and_atrial_fibrilation	Verweij_et_al_2020
rs6565060	CDH13	ECG_traits_and_atrial_fibrilation	Verweij_et_al_2020
16:88527325_AGGGGC_A	ZFPM1	ECG_traits_and_atrial_fibrilation	Verweij_et_al_2020
rs4614769	MAP2K4	ECG_traits_and_atrial_fibrilation	Verweij_et_al_2020
rs12945974	MYOCD	ECG_traits_and_atrial_fibrilation	Verweij_et_al_2020
17:12642266_TTA_T	MYOCD	ECG_traits_and_atrial_fibrilation	Verweij_et_al_2020
rs4925095	RAI1	ECG_traits_and_atrial_fibrilation	Verweij_et_al_2020
rs8077048	NUFIP2	ECG_traits_and_atrial_fibrilation	Verweij_et_al_2020
17:28267098_CT_C	SSH2	ECG_traits_and_atrial_fibrilation	Verweij_et_al_2020
17:28267098_CT_C	EFCAB5	ECG_traits_and_atrial_fibrilation	Verweij_et_al_2020
17:28267098_CT_C	CORO6	ECG_traits_and_atrial_fibrilation	Verweij_et_al_2020
rs1088450	RFFL	ECG_traits_and_atrial_fibrilation	Verweij_et_al_2020
rs772490616	DBF4B	ECG_traits_and_atrial_fibrilation	Verweij_et_al_2020
rs772490616	ADAM11	ECG_traits_and_atrial_fibrilation	Verweij_et_al_2020
rs772490616	CCDC43	ECG_traits_and_atrial_fibrilation	Verweij_et_al_2020
rs17608766	GOSR2	ECG_traits_and_atrial_fibrilation	Verweij_et_al_2020
rs34081637	CACNA1G	ECG_traits_and_atrial_fibrilation	Verweij_et_al_2020
rs138998340	YPEL2	ECG_traits_and_atrial_fibrilation	Verweij_et_al_2020
rs9909004	PRKCA	ECG_traits_and_atrial_fibrilation	Verweij_et_al_2020
rs8067476	AMZ2	ECG_traits_and_atrial_fibrilation	Verweij_et_al_2020
rs236586	KCNJ2	ECG_traits_and_atrial_fibrilation	Verweij_et_al_2020
rs312755	KCNJ2	ECG_traits_and_atrial_fibrilation	Verweij_et_al_2020
rs28360848	CBX4	ECG_traits_and_atrial_fibrilation	Verweij_et_al_2020
rs28360848	CBX8	ECG_traits_and_atrial_fibrilation	Verweij_et_al_2020
rs12051698	BAIAP2	ECG_traits_and_atrial_fibrilation	Verweij_et_al_2020
rs12051698	AATK	ECG_traits_and_atrial_fibrilation	Verweij_et_al_2020
rs766320	GATA6	ECG_traits_and_atrial_fibrilation	Verweij_et_al_2020
rs35236676	CTAGE1	ECG_traits_and_atrial_fibrilation	Verweij_et_al_2020
rs12454640	KCTD1	ECG_traits_and_atrial_fibrilation	Verweij_et_al_2020
rs11665344	CDH2	ECG_traits_and_atrial_fibrilation	Verweij_et_al_2020
rs356907	CDH2	ECG_traits_and_atrial_fibrilation	Verweij_et_al_2020
rs476348	MAPRE2	ECG_traits_and_atrial_fibrilation	Verweij_et_al_2020
rs2848901	FHOD3	ECG_traits_and_atrial_fibrilation	Verweij_et_al_2020
rs1126225	SETBP1	ECG_traits_and_atrial_fibrilation	Verweij_et_al_2020
rs9952412	SMAD7	ECG_traits_and_atrial_fibrilation	Verweij_et_al_2020
rs689049	CCBE1	ECG_traits_and_atrial_fibrilation	Verweij_et_al_2020
rs200181073	SF3A2	ECG_traits_and_atrial_fibrilation	Verweij_et_al_2020
rs200181073	AMH	ECG_traits_and_atrial_fibrilation	Verweij_et_al_2020
rs200181073	JSRP1	ECG_traits_and_atrial_fibrilation	Verweij_et_al_2020
rs113394178	C19orf45	ECG_traits_and_atrial_fibrilation	Verweij_et_al_2020
rs113394178	ZNF358	ECG_traits_and_atrial_fibrilation	Verweij_et_al_2020
rs113394178	MCOLN1	ECG_traits_and_atrial_fibrilation	Verweij_et_al_2020
rs10853935	GPI	ECG_traits_and_atrial_fibrilation	Verweij_et_al_2020
rs10853935	PDCD2L	ECG_traits_and_atrial_fibrilation	Verweij_et_al_2020
rs10853935	WTIP	ECG_traits_and_atrial_fibrilation	Verweij_et_al_2020
rs10853935	KIAA0355	ECG_traits_and_atrial_fibrilation	Verweij_et_al_2020
rs10409940	AXL	ECG_traits_and_atrial_fibrilation	Verweij_et_al_2020
rs10409940	CYP2S1	ECG_traits_and_atrial_fibrilation	Verweij_et_al_2020
rs9630873	NOVA2	ECG_traits_and_atrial_fibrilation	Verweij_et_al_2020
rs35828463	KCNA7	ECG_traits_and_atrial_fibrilation	Verweij_et_al_2020
rs35828463	SNRNP70	ECG_traits_and_atrial_fibrilation	Verweij_et_al_2020
rs191904180	LRRC4B	ECG_traits_and_atrial_fibrilation	Verweij_et_al_2020
rs12610825	FPR1	ECG_traits_and_atrial_fibrilation	Verweij_et_al_2020
rs12610825	FPR3	ECG_traits_and_atrial_fibrilation	Verweij_et_al_2020
rs6084574	RNF24	ECG_traits_and_atrial_fibrilation	Verweij_et_al_2020
rs11699612	BMP2	ECG_traits_and_atrial_fibrilation	Verweij_et_al_2020
rs369307656	HCK	ECG_traits_and_atrial_fibrilation	Verweij_et_al_2020
rs2025096	GSS	ECG_traits_and_atrial_fibrilation	Verweij_et_al_2020
rs2025096	MYH7B	ECG_traits_and_atrial_fibrilation	Verweij_et_al_2020
rs2025096	EDEM2	ECG_traits_and_atrial_fibrilation	Verweij_et_al_2020
rs4811601	KIAA1755	ECG_traits_and_atrial_fibrilation	Verweij_et_al_2020
rs59499156	ZNFX1	ECG_traits_and_atrial_fibrilation	Verweij_et_al_2020
rs59499156	STAU1	ECG_traits_and_atrial_fibrilation	Verweij_et_al_2020
rs8115156	RBM38	ECG_traits_and_atrial_fibrilation	Verweij_et_al_2020
rs310614	EEF1A2	ECG_traits_and_atrial_fibrilation	Verweij_et_al_2020
rs3787112	GMEB2	ECG_traits_and_atrial_fibrilation	Verweij_et_al_2020
rs2830965	ADAMTS5	ECG_traits_and_atrial_fibrilation	Verweij_et_al_2020
rs762834393	CCT8	ECG_traits_and_atrial_fibrilation	Verweij_et_al_2020
rs762834393	MAP3K7CL	ECG_traits_and_atrial_fibrilation	Verweij_et_al_2020
rs762834393	C21orf7	ECG_traits_and_atrial_fibrilation	Verweij_et_al_2020
rs1999323	MAP3K7CL	ECG_traits_and_atrial_fibrilation	Verweij_et_al_2020
rs1999323	C21orf7	ECG_traits_and_atrial_fibrilation	Verweij_et_al_2020
rs41312993	KCNE1	ECG_traits_and_atrial_fibrilation	Verweij_et_al_2020
rs1805128	KCNE1	ECG_traits_and_atrial_fibrilation	Verweij_et_al_2020
rs2186370	SMARCB1	ECG_traits_and_atrial_fibrilation	Verweij_et_al_2020
rs2186370	DERL3	ECG_traits_and_atrial_fibrilation	Verweij_et_al_2020
rs2186370	MMP11	ECG_traits_and_atrial_fibrilation	Verweij_et_al_2020
rs2186370	CHCHD10	ECG_traits_and_atrial_fibrilation	Verweij_et_al_2020
rs133885	MYO18B	ECG_traits_and_atrial_fibrilation	Verweij_et_al_2020

## Sheet: Supplementary File 3i
Drosophila orthologues of human cardiac traits genes (Supplementary File 3h) identified using DIOPT (https://www.flyrnai.org/diopt)
Human GeneID	Human Gene ID	HGNCID	Human Symbol	Species	Fly GeneID	FlyBaseID	Fly Symbol	DIOPT Score	Weighted Score	Rank	Best Score	Best Score Reverse	Prediction Derived From
UBE4B	10277	12500	UBE4B	Fly	34699	FBgn0032467	CG9934	14	13.74	high	Yes	Yes	Compara, eggNOG, Hieranoid, Homologene, Inparanoid, Isobase, OrthoDB, OrthoFinder, OrthoInspector, orthoMCL, Panther, Phylome, RoundUp, TreeFam
CASZ1	54897	26002	CASZ1	Fly	44018	FBgn0004878	cas	7	6.89	high	Yes	Yes	eggNOG, OrthoFinder, OrthoInspector, orthoMCL, Panther, RoundUp, TreeFam
XPO1	7514	12825	XPO1	Fly	34167	FBgn0020497	emb	13	12.9	high	Yes	Yes	Compara, eggNOG, Hieranoid, Homologene, Inparanoid, OMA, OrthoDB, OrthoFinder, OrthoInspector, Panther, Phylome, RoundUp, TreeFam
KDM3A	55818	20815	KDM3A	Fly	41143	FBgn0037703	JHDM2	10	9.76	high	Yes	Yes	Compara, eggNOG, Inparanoid, OrthoDB, OrthoFinder, OrthoInspector, orthoMCL, Panther, Phylome, TreeFam
WIPF1	7456	12736	WIPF1	Fly	37521	FBgn0243516	Vrp1	5	4.79	high	Yes	Yes	Compara, eggNOG, orthoMCL, Panther, TreeFam
CHRNA1	1134	1955	CHRNA1	Fly	38545	FBgn0000038	nAChRbeta1	5	4.88	high	Yes	Yes	eggNOG, OrthoDB, Panther, Phylome, TreeFam
LRIG1	26018	17360	LRIG1	Fly	36788	FBgn0034083	lbk	11	10.89	high	Yes	Yes	Compara, eggNOG, Hieranoid, Inparanoid, OMA, OrthoFinder, OrthoInspector, Panther, Phylome, RoundUp, TreeFam
WDR1	9948	12754	WDR1	Fly	39505	FBgn0260049	flr	13	12.79	high	Yes	Yes	Compara, eggNOG, Hieranoid, Homologene, Inparanoid, OMA, OrthoFinder, OrthoInspector, orthoMCL, Panther, Phylome, RoundUp, TreeFam
CAMK2D	817	1462	CAMK2D	Fly	43828	FBgn0264607	CaMKII	13	12.82	high	Yes	Yes	eggNOG, Hieranoid, Homologene, Inparanoid, Isobase, OMA, OrthoDB, OrthoInspector, orthoMCL, Panther, Phylome, RoundUp, TreeFam
ARHGAP26	23092	17073	ARHGAP26	Fly	32522	FBgn0030685	Graf	14	13.82	high	Yes	Yes	eggNOG, Hieranoid, Homologene, Inparanoid, Isobase, OMA, OrthoDB, OrthoFinder, OrthoInspector, orthoMCL, Panther, Phylome, RoundUp, TreeFam
CDKN1A	1026	1784	CDKN1A	Fly	36001	FBgn0010316	dap	3	2.91	high	Yes	Yes	eggNOG, OrthoDB, OrthoFinder
UST	10090	17223	UST	Fly	40104	FBgn0003089	pip	5	4.8	high	Yes	Yes	Compara, eggNOG, Panther, Phylome, TreeFam
DGKB	1607	2850	DGKB	Fly	35738	FBgn0085390	Dgk	13	12.81	high	Yes	Yes	eggNOG, Hieranoid, Homologene, Inparanoid, Isobase, OMA, OrthoFinder, OrthoInspector, orthoMCL, Panther, Phylome, RoundUp, TreeFam
COG5	10466	14857	COG5	Fly	35054	FBgn0024689	fws	13	12.8	high	Yes	Yes	Compara, eggNOG, Hieranoid, Inparanoid, OMA, OrthoDB, OrthoFinder, OrthoInspector, orthoMCL, Panther, Phylome, RoundUp, TreeFam
KCNH2	3757	6251	KCNH2	Fly	37843	FBgn0003353	sei	11	10.68	high	Yes	Yes	Compara, eggNOG, Hieranoid, Isobase, OrthoFinder, OrthoInspector, orthoMCL, Panther, Phylome, RoundUp, TreeFam
XPO7	23039	14108	XPO7	Fly	118436	FBgn0053180	Ranbp16	15	14.75	high	Yes	Yes	Compara, eggNOG, Hieranoid, Homologene, Inparanoid, Isobase, OMA, OrthoDB, OrthoFinder, OrthoInspector, orthoMCL, Panther, Phylome, RoundUp, TreeFam
MTSS1	9788	20443	MTSS1	Fly	2768716	FBgn0053558	mim	7	6.92	high	Yes	Yes	Compara, eggNOG, OrthoFinder, OrthoInspector, Panther, RoundUp, TreeFam
PTK2	5747	9611	PTK2	Fly	37233	FBgn0020440	Fak	12	11.77	high	Yes	Yes	eggNOG, Hieranoid, Homologene, Inparanoid, OMA, OrthoDB, OrthoFinder, OrthoInspector, orthoMCL, Phylome, RoundUp, TreeFam
SLC24A2	25769	10976	SLC24A2	Fly	45248	FBgn0028704	Nckx30C	14	13.85	high	Yes	Yes	Compara, eggNOG, Hieranoid, Homologene, Inparanoid, Isobase, OMA, OrthoDB, OrthoFinder, OrthoInspector, Panther, Phylome, RoundUp, TreeFam
MLLT3	4300	7136	MLLT3	Fly	44451	FBgn0026441	ear	8	7.84	high	Yes	Yes	Compara, eggNOG, Inparanoid, OrthoFinder, OrthoInspector, orthoMCL, Panther, TreeFam
ZNF462	58499	21684	ZNF462	Fly	34701	FBgn0262160	CG9932	3	2.96	high	Yes	Yes	eggNOG, Panther, TreeFam
ZNF462	58499	21684	ZNF462	Fly	34706	FBgn0032473	kmg	3	2.96	high	Yes	Yes	eggNOG, Panther, TreeFam
PSMB7	5695	9544	PSMB7	Fly	39628	FBgn0023174	Prosbeta2	14	13.82	high	Yes	Yes	eggNOG, Hieranoid, Homologene, Inparanoid, Isobase, OMA, OrthoDB, OrthoFinder, OrthoInspector, orthoMCL, Panther, Phylome, RoundUp, TreeFam
C10orf11	83938	23405	LRMDA	Fly	318582	FBgn0051076	CG31076	11	10.9	high	Yes	Yes	Compara, Inparanoid, OMA, OrthoDB, OrthoFinder, OrthoInspector, orthoMCL, Panther, Phylome, RoundUp, TreeFam
C10orf76	79591	25788	ARMH3	Fly	41060	FBgn0037638	CG8379	14	13.8	high	Yes	Yes	Compara, eggNOG, Hieranoid, Homologene, Inparanoid, OMA, OrthoDB, OrthoFinder, OrthoInspector, orthoMCL, Panther, Phylome, RoundUp, TreeFam
NAV2	89797	15997	NAV2	Fly	35277	FBgn0263873	sick	9	8.94	high	Yes	Yes	eggNOG, Hieranoid, Inparanoid, Isobase, OrthoFinder, OrthoInspector, Panther, Phylome, RoundUp
SSPN	8082	11322	SSPN	Fly	32163	FBgn0030360	CG1806	3	2.93	high	Yes	Yes	Compara, orthoMCL, Panther
NACA	4666	7629	NACA	Fly	36409	FBgn0086904	Nacalpha	11	10.81	high	Yes	Yes	eggNOG, Inparanoid, Isobase, OrthoDB, OrthoFinder, OrthoInspector, orthoMCL, Panther, Phylome, RoundUp, TreeFam
BEST3	144453	17105	BEST3	Fly	53431	FBgn0040238	Best1	12	11.79	high	Yes	Yes	Compara, eggNOG, Hieranoid, Inparanoid, OrthoDB, OrthoFinder, OrthoInspector, orthoMCL, Panther, Phylome, RoundUp, TreeFam
KRR1	11103	5176	KRR1	Fly	33269	FBgn0020305	dbe	14	13.8	high	Yes	Yes	Compara, eggNOG, Hieranoid, Homologene, Inparanoid, OMA, OrthoDB, OrthoFinder, OrthoInspector, orthoMCL, Panther, Phylome, RoundUp, TreeFam
DNAH10	196385	2941	DNAH10	Fly	43379	FBgn0013813	Dhc98D	14	13.85	high	Yes	Yes	Compara, eggNOG, Hieranoid, Homologene, Inparanoid, Isobase, OMA, OrthoDB, OrthoFinder, OrthoInspector, Panther, Phylome, RoundUp, TreeFam
MYH7	4625	7577	MYH7	Fly	35007	FBgn0264695	Mhc	12	11.86	high	Yes	Yes	eggNOG, Hieranoid, Homologene, Inparanoid, OMA, OrthoFinder, OrthoInspector, orthoMCL, Panther, Phylome, RoundUp, TreeFam
SNX6	58533	14970	SNX6	Fly	34126	FBgn0032005	Snx6	13	12.87	high	Yes	Yes	eggNOG, Hieranoid, Homologene, Inparanoid, OMA, OrthoDB, OrthoFinder, OrthoInspector, orthoMCL, Panther, Phylome, RoundUp, TreeFam
CFL2	1073	1875	CFL2	Fly	32861	FBgn0030951	CG6873	11	10.78	high	Yes	Yes	Compara, eggNOG, Inparanoid, Isobase, OrthoDB, OrthoFinder, OrthoInspector, orthoMCL, Panther, Phylome, RoundUp
CFL2	1073	1875	CFL2	Fly	37841	FBgn0011726	tsr	11	10.78	high	Yes	Yes	Compara, eggNOG, Inparanoid, Isobase, OrthoDB, OrthoFinder, OrthoInspector, orthoMCL, Panther, Phylome, RoundUp
IRF2BPL	64207	14282	IRF2BPL	Fly	32205	FBgn0030400	Pits	11	10.9	high	Yes	Yes	Compara, eggNOG, Hieranoid, Inparanoid, OMA, OrthoDB, OrthoInspector, Panther, Phylome, RoundUp, TreeFam
TLE3	7090	11839	TLE3	Fly	43162	FBgn0001139	gro	12	11.79	high	Yes	Yes	Compara, eggNOG, Hieranoid, Inparanoid, OrthoDB, OrthoFinder, OrthoInspector, orthoMCL, Panther, Phylome, RoundUp, TreeFam
IGF1R	3480	5465	IGF1R	Fly	42549	FBgn0283499	InR	12	11.9	high	Yes	Yes	eggNOG, Hieranoid, Homologene, Inparanoid, Isobase, OrthoDB, OrthoFinder, OrthoInspector, orthoMCL, Panther, RoundUp, TreeFam
RPS2	6187	10404	RPS2	Fly	34309	FBgn0004867	RpS2	13	12.77	high	Yes	Yes	Compara, eggNOG, Hieranoid, Homologene, Inparanoid, OMA, OrthoDB, OrthoFinder, OrthoInspector, orthoMCL, Panther, Phylome, TreeFam
POLR2A	5430	9187	POLR2A	Fly	32100	FBgn0003277	RpII215	14	13.82	high	Yes	Yes	eggNOG, Hieranoid, Homologene, Inparanoid, Isobase, OMA, OrthoDB, OrthoFinder, OrthoInspector, orthoMCL, Panther, Phylome, RoundUp, TreeFam
MAPT	4137	6893	MAPT	Fly	326116	FBgn0266579	tau	7	6.84	high	Yes	Yes	eggNOG, OrthoFinder, OrthoInspector, orthoMCL, Panther, Phylome, RoundUp
KCNJ2	3759	6263	KCNJ2	Fly	42770	FBgn0039081	Irk2	9	8.88	high	Yes	Yes	eggNOG, Inparanoid, OMA, OrthoDB, OrthoFinder, OrthoInspector, orthoMCL, Panther, Phylome
KCNJ2	3759	6263	KCNJ2	Fly	42742	FBgn0265042	Irk1	9	8.87	high	Yes	Yes	eggNOG, Homologene, Inparanoid, OMA, OrthoFinder, OrthoInspector, orthoMCL, Panther, Phylome
SMAD7	4092	6773	SMAD7	Fly	42059	FBgn0020493	Dad	10	9.88	high	Yes	Yes	Compara, eggNOG, Hieranoid, Isobase, OrthoDB, OrthoFinder, OrthoInspector, Panther, RoundUp, TreeFam
BMP2	650	1069	BMP2	Fly	33432	FBgn0000490	dpp	9	8.94	high	Yes	Yes	eggNOG, Homologene, Inparanoid, Isobase, OrthoFinder, OrthoInspector, Panther, Phylome, RoundUp
PMVK	10654	9141	PMVK	Fly	35255	FBgn0032811	CG10268	14	13.85	high	Yes	Yes	Compara, Hieranoid, Homologene, Inparanoid, Isobase, OMA, OrthoDB, OrthoFinder, OrthoInspector, orthoMCL, Panther, Phylome, RoundUp, TreeFam
GORAB	92344	25676	GORAB	Fly	326245	FBgn0053052	Gorab	10	9.74	high	Yes	Yes	Compara, eggNOG, OrthoDB, OrthoFinder, OrthoInspector, orthoMCL, Panther, Phylome, RoundUp, TreeFam
PRRX1	5396	9142	PRRX1	Fly	37668	FBgn0034821	CG9876	9	8.78	high	Yes	Yes	Compara, Hieranoid, Inparanoid, OrthoFinder, OrthoInspector, orthoMCL, Phylome, RoundUp, TreeFam
SNRNP27	11017	30240	SNRNP27	Fly	47457	FBgn0021895	ytr	12	11.87	high	Yes	Yes	eggNOG, Hieranoid, Inparanoid, OMA, OrthoDB, OrthoFinder, OrthoInspector, orthoMCL, Panther, Phylome, RoundUp, TreeFam
TTN	7273	12403	TTN	Fly	43814	FBgn0005666	bt	9	8.86	high	Yes	Yes	eggNOG, Isobase, OrthoDB, OrthoFinder, OrthoInspector, Panther, Phylome, RoundUp, TreeFam
PITX2	5308	9005	PITX2	Fly	43664	FBgn0020912	Ptx1	11	10.86	high	Yes	Yes	eggNOG, Hieranoid, Homologene, Inparanoid, OrthoDB, OrthoInspector, orthoMCL, Panther, Phylome, RoundUp, TreeFam
HAND2	9464	4808	HAND2	Fly	34379	FBgn0032209	Hand	13	12.74	high	Yes	Yes	Compara, eggNOG, Hieranoid, Inparanoid, Isobase, OrthoDB, OrthoFinder, OrthoInspector, orthoMCL, Panther, Phylome, RoundUp, TreeFam
NME5	8382	7853	NME5	Fly	43661	FBgn0039809	CG15547	5	4.78	high	Yes	Yes	Compara, eggNOG, Isobase, orthoMCL, Panther
[truncated: 3,342 more rows]
