# Supplementary material for: Genetic architecture of natural variation of cardiac performance from flies to humans
Source: eLife. 2022 Nov 16;11:e82459. doi: 10.7554/eLife.82459 (PMC9668334; doi:10.7554/eLife.82459)
Supplement: Supplementary file 4. — (a) Fly cardiac mean genome-wide associations studies (GWAS) genes (Supplementary file 1f) and corresponding human orthologues identified with DIOPT. (b) Fly cardiac mean GWAS genes and corresponding human orthologues associated with cardiac disorders. (c) Fly cardiac mean GWAS genes, and corresponding human orthologues associated with CAD. (d) Fly cardiac CVe GWAS (Supplementary file 3a) genes and corresponding human orthologues identified with DIOPT. (e) Fly cardiac CVe GWAS genes and corresponding human orthologues associated with cardiac disorders. (f) Fly cardiac Cve GWAS genes and corresponding human orthologues associated with CAD. (g) Headcounts of fly mean GWAS genes for which human orthologues have been identified in human GWAS studies (moderate and high rank), and hypergeometric distribution calculations. (h) DGRP lines analyzed. (i) Other fly lines used in the study. [file elife-82459-supp4.xlsx]

## Sheet: Supplementary File 4a
Fly cardiac Mean GWAS genes and corresponding human orthologues identified with DIOPT.
...1	Fly GeneID	GeneSymbol_dm3	method	AI	EDD	FS	HP	ESD	SI	DI	Fly GeneID_dm6	gene_symbol_dm6	Fly Gene ID	FlyBaseID	Fly Symbol	Species	Human GeneID	HGNCID	Human Symbol	DIOPT Score	Weighted Score	Rank	Best Score	Best Score Reverse	Prediction Derived From
2	FBgn0040388	boi	FastLMM_FastEpistasis	1	0	0	1	0	0	0	FBGN0040388	boi	31229	FBgn0040388	boi	Human	91653	17173	BOC	6	6.04	high	Yes	Yes	Inparanoid, OMA, OrthoDB, Panther, Phylome, TreeFam
3	FBgn0000114	aret	FastLMM_FastEpistasis	0	0	0	0	0	0	1	FBGN0000114	bru1	34648	FBgn0000114	bru1	Human	10659	2550	CELF2	14	13.8	high	Yes	Yes	Compara, eggNOG, Hieranoid, Homologene, Inparanoid, OMA, OrthoDB, OrthoFinder, OrthoInspector, orthoMCL, Panther, Phylome, RoundUp, TreeFam
3	FBgn0000114	aret	FastLMM_FastEpistasis	0	0	0	0	0	0	1	FBGN0000114	bru1	34648	FBgn0000114	bru1	Human	10658	2549	CELF1	14	13.75	high	Yes	Yes	Compara, eggNOG, Hieranoid, Inparanoid, Isobase, OMA, OrthoDB, OrthoFinder, OrthoInspector, orthoMCL, Panther, Phylome, RoundUp, TreeFam
4	FBgn0259176	bun	FastLMM_FastEpistasis	0	0	0	0	0	1	0	FBGN0259176	bun	34665	FBgn0259176	bun	Human	8848	16826	TSC22D1	10	9.88	high	Yes	Yes	Compara, eggNOG, Hieranoid, Inparanoid, OMA, OrthoInspector, orthoMCL, Panther, RoundUp, TreeFam
5	FBgn0039633	CG11873	FastLMM_FastEpistasis	1	0	1	0	1	0	0	FBGN0039633	CG11873	43435	FBgn0039633	CG11873	Human	29998	4332	BICRA	4	4.13	high	Yes	Yes	OrthoFinder, OrthoInspector, Panther, RoundUp
6	FBgn0052264	CG32264	FastLMM_FastEpistasis	0	0	0	1	0	0	0	FBGN0052264	CG32264	38438	FBgn0052264	CG32264	Human	221692	20990	PHACTR1	8	8.01	high	Yes	Yes	Compara, eggNOG, Hieranoid, Inparanoid, OrthoFinder, OrthoInspector, Panther, RoundUp
6	FBgn0052264	CG32264	FastLMM_FastEpistasis	0	0	0	1	0	0	0	FBGN0052264	CG32264	38438	FBgn0052264	CG32264	Human	9749	20956	PHACTR2	8	7.83	high	Yes	Yes	Compara, eggNOG, Hieranoid, OrthoInspector, Panther, Phylome, RoundUp, TreeFam
7	FBgn0053158	CG33158	FastLMM_FastEpistasis	0	1	0	0	0	0	1	FBGN0053158	CG33158	39834	FBgn0053158	CG33158	Human	79631	25789	EFL1	15	14.75	high	Yes	Yes	Compara, eggNOG, Hieranoid, Homologene, Inparanoid, Isobase, OMA, OrthoDB, OrthoFinder, OrthoInspector, orthoMCL, Panther, Phylome, RoundUp, TreeFam
8	FBgn0263131	CG43373	FastLMM_FastEpistasis	0	0	0	0	0	0	1	FBGN0263131	CG43373	39835	FBgn0263131	CG43373	Human	111	236	ADCY5	11	10.88	high	Yes	Yes	Compara, eggNOG, Hieranoid, Homologene, Inparanoid, OrthoFinder, OrthoInspector, Panther, Phylome, RoundUp, TreeFam
10	FBgn0053531	Ddr	FastLMM_FastEpistasis	0	1	0	0	0	1	0	FBGN0053531	Ddr	3346209	FBgn0053531	Ddr	Human	4921	2731	DDR2	13	12.87	high	Yes	Yes	eggNOG, Hieranoid, Homologene, Inparanoid, OMA, OrthoDB, OrthoFinder, OrthoInspector, orthoMCL, Panther, Phylome, RoundUp, TreeFam
11	FBgn0000568	Eip75B	FastLMM_FastEpistasis	1	0	1	0	0	0	0	FBGN0000568	Eip75B	39999	FBgn0000568	Eip75B	Human	5468	9236	PPARG	4	4.13	high	Yes	Yes	OrthoFinder, OrthoInspector, Panther, RoundUp
11	FBgn0000568	Eip75B	FastLMM_FastEpistasis	1	0	1	0	0	0	0	FBGN0000568	Eip75B	39999	FBgn0000568	Eip75B	Human	5465	9232	PPARA	4	4.13	high	Yes	Yes	OrthoFinder, OrthoInspector, Panther, RoundUp
11	FBgn0000568	Eip75B	FastLMM_FastEpistasis	1	0	1	0	0	0	0	FBGN0000568	Eip75B	39999	FBgn0000568	Eip75B	Human	5467	9235	PPARD	4	4.05	high	Yes	Yes	Isobase, OrthoFinder, OrthoInspector, Panther
12	FBgn0031414	eys	FastLMM_FastEpistasis	0	1	0	1	0	0	0	FBGN0031414	eys	3771890	FBgn0031414	eys	Human	346007	21555	EYS	5	5.09	high	Yes	Yes	eggNOG, Inparanoid, OMA, Panther, RoundUp
15	FBgn0262117	IntS3	FastLMM_FastEpistasis	0	0	0	0	0	1	1	FBGN0262117	IntS3	3355010	FBgn0262117	IntS3	Human	65123	26153	INTS3	14	13.8	high	Yes	Yes	Compara, eggNOG, Hieranoid, Homologene, Inparanoid, OMA, OrthoDB, OrthoFinder, OrthoInspector, orthoMCL, Panther, Phylome, RoundUp, TreeFam
18	FBgn0043070	MESK2	FastLMM_FastEpistasis	1	0	0	0	0	1	0	FBGN0043070	MESK2	37451	FBgn0043070	MESK2	Human	57446	14462	NDRG3	13	12.84	high	Yes	Yes	Compara, eggNOG, Hieranoid, Homologene, Inparanoid, OMA, OrthoDB, OrthoFinder, OrthoInspector, orthoMCL, Panther, Phylome, RoundUp
19	FBgn0013563	Pex1	FastLMM_FastEpistasis	0	0	0	0	1	0	0	FBGN0013563	Pex1	45460	FBgn0013563	Pex1	Human	5189	8850	PEX1	12	11.79	high	Yes	Yes	Compara, eggNOG, Hieranoid, Inparanoid, OrthoDB, OrthoFinder, OrthoInspector, orthoMCL, Panther, Phylome, RoundUp, TreeFam
20	FBgn0029881	pigs	FastLMM_FastEpistasis	1	0	0	0	0	0	1	FBGN0029881	pigs	31596	FBgn0029881	pigs	Human	10634	16955	GAS2L1	11	10.74	high	Yes	Yes	Compara, eggNOG, Hieranoid, OrthoDB, OrthoFinder, OrthoInspector, orthoMCL, Panther, Phylome, RoundUp, TreeFam
21	FBgn0003129	Poxm	FastLMM_FastEpistasis	0	1	0	0	1	0	0	FBGN0003129	Poxm	40990	FBgn0003129	Poxm	Human	5075	8615	PAX1	11	10.89	high	Yes	Yes	Compara, eggNOG, Hieranoid, Inparanoid, OrthoDB, OrthoFinder, OrthoInspector, Panther, Phylome, RoundUp, TreeFam
21	FBgn0003129	Poxm	FastLMM_FastEpistasis	0	1	0	0	1	0	0	FBGN0003129	Poxm	40990	FBgn0003129	Poxm	Human	5083	8623	PAX9	11	10.86	high	Yes	Yes	eggNOG, Hieranoid, Inparanoid, OrthoDB, OrthoFinder, OrthoInspector, orthoMCL, Panther, Phylome, RoundUp, TreeFam
22	FBgn0040752	Prosap	FastLMM_FastEpistasis	0	1	0	0	0	0	1	FBGN0040752	Prosap	50225	FBgn0040752	Prosap	Human	50944	15474	SHANK1	11	10.88	high	Yes	Yes	Compara, eggNOG, Hieranoid, Inparanoid, OrthoDB, OrthoFinder, OrthoInspector, orthoMCL, Panther, RoundUp, TreeFam
23	FBgn0004369	Ptp99A	FastLMM_FastEpistasis	0	0	0	1	0	0	0	FBGN0004369	Ptp99A	43469	FBgn0004369	Ptp99A	Human	5793	9671	PTPRG	9	9	high	Yes	Yes	eggNOG, Hieranoid, Inparanoid, OrthoDB, OrthoFinder, OrthoInspector, Panther, Phylome, RoundUp
25	FBgn0011828	Pxn	FastLMM_FastEpistasis	1	0	0	0	0	1	0	FBGN0011828	Pxn	38326	FBgn0011828	Pxn	Human	7837	14966	PXDN	13	12.79	high	Yes	Yes	Compara, eggNOG, Hieranoid, Homologene, Inparanoid, OrthoDB, OrthoFinder, OrthoInspector, orthoMCL, Panther, Phylome, RoundUp, TreeFam
26	FBgn0260943	Rbp6	FastLMM_FastEpistasis	0	1	0	0	0	1	0	FBGN0260943	Rbp6	39919	FBgn0260943	Rbp6	Human	124540	18585	MSI2	13	12.74	high	Yes	Yes	Compara, eggNOG, Homologene, Inparanoid, Isobase, OrthoDB, OrthoFinder, OrthoInspector, orthoMCL, Panther, Phylome, RoundUp, TreeFam
28	FBgn0266696	CG42669	FastLMM_FastEpistasis	0	0	0	1	1	1	1	FBGN0266696	Svil	38306	FBgn0266696	Svil	Human	6840	11480	SVIL	6	6.05	high	Yes	Yes	OrthoDB, OrthoFinder, OrthoInspector, Panther, Phylome, RoundUp
29	FBgn0004449	Ten-m	FastLMM_FastEpistasis	0	1	0	0	0	1	0	FBGN0004449	Ten-m	40464	FBgn0004449	Ten-m	Human	57451	29943	TENM2	13	12.79	high	Yes	Yes	Compara, eggNOG, Hieranoid, Homologene, Inparanoid, OMA, OrthoFinder, OrthoInspector, orthoMCL, Panther, Phylome, RoundUp, TreeFam
29	FBgn0004449	Ten-m	FastLMM_FastEpistasis	0	1	0	0	0	1	0	FBGN0004449	Ten-m	40464	FBgn0004449	Ten-m	Human	10178	8117	TENM1	13	12.74	high	Yes	Yes	Compara, eggNOG, Hieranoid, Inparanoid, Isobase, OMA, OrthoFinder, OrthoInspector, orthoMCL, Panther, Phylome, RoundUp, TreeFam
30	FBgn0283657	tlk	FastLMM_FastEpistasis	0	1	0	1	0	0	0	FBGN0283657	Tlk	318206	FBgn0283657	Tlk	Human	11011	11842	TLK2	11	10.68	high	Yes	Yes	Compara, eggNOG, Homologene, Isobase, OrthoFinder, OrthoInspector, orthoMCL, Panther, Phylome, RoundUp, TreeFam
31	FBgn0051721	Trim9	FastLMM_FastEpistasis	0	0	0	0	1	1	0	FBGN0051721	Trim9	34453	FBgn0051721	Trim9	Human	114088	16288	TRIM9	12	11.86	high	Yes	Yes	eggNOG, Hieranoid, Homologene, Inparanoid, OMA, OrthoFinder, OrthoInspector, orthoMCL, Panther, Phylome, RoundUp, TreeFam
32	FBgn0004168	5-HT1A	FastLMM	0	0	0	0	1	0	0	FBGN0004168	5-HT1A	37196	FBgn0004168	5-HT1A	Human	3350	5286	HTR1A	7	6.91	high	Yes	Yes	eggNOG, Hieranoid, Homologene, Inparanoid, Isobase, Panther, Phylome
34	FBgn0000097	aop	FastLMM	0	0	0	0	0	1	0	FBGN0000097	aop	33392	FBgn0000097	aop	Human	2120	3495	ETV6	10	9.86	high	Yes	Yes	eggNOG, Inparanoid, OrthoDB, OrthoFinder, OrthoInspector, orthoMCL, Panther, Phylome, RoundUp, TreeFam
35	FBgn0260941	app	FastLMM	1	0	0	0	0	0	0	FBGN0260941	app	39399	FBgn0260941	app	Human	79683	20341	ZDHHC14	10	9.84	high	Yes	Yes	Compara, eggNOG, Homologene, OrthoDB, OrthoFinder, OrthoInspector, Panther, Phylome, RoundUp, TreeFam
36	FBgn0036111	Aps	FastLMM	0	0	0	0	0	1	0	FBGN0036111	Aps	39226	FBgn0036111	Aps	Human	55190	18011	NUDT11	13	12.82	high	Yes	Yes	eggNOG, Hieranoid, Inparanoid, Isobase, OMA, OrthoDB, OrthoFinder, OrthoInspector, orthoMCL, Panther, Phylome, RoundUp, TreeFam
36	FBgn0036111	Aps	FastLMM	0	0	0	0	0	1	0	FBGN0036111	Aps	39226	FBgn0036111	Aps	Human	11163	8051	NUDT4	13	12.8	high	Yes	Yes	Compara, eggNOG, Hieranoid, Inparanoid, OMA, OrthoDB, OrthoFinder, OrthoInspector, orthoMCL, Panther, Phylome, RoundUp, TreeFam
37	FBgn0034606	ASPP	FastLMM	0	0	1	0	0	0	1	FBGN0034606	ASPP	37422	FBgn0034606	ASPP	Human	23368	14950	PPP1R13B	14	13.75	high	Yes	Yes	Compara, eggNOG, Hieranoid, Inparanoid, Isobase, OMA, OrthoDB, OrthoFinder, OrthoInspector, orthoMCL, Panther, Phylome, RoundUp, TreeFam
41	FBgn0020762	Atet	FastLMM	0	0	1	0	0	0	0	FBGN0020762	Atet	33636	FBgn0020762	Atet	Human	64137	13884	ABCG4	12	11.82	high	Yes	Yes	Compara, eggNOG, Hieranoid, Homologene, Inparanoid, Isobase, OMA, OrthoDB, OrthoFinder, Panther, Phylome, TreeFam
42	FBgn0051477	CG31477	FastLMM	0	1	0	0	0	0	0	FBGN0051477	ATPsynepsilonL	326144	FBgn0051477	ATPsynepsilonL	Human	514	838	ATP5F1E	11	10.86	high	Yes	Yes	eggNOG, Hieranoid, Inparanoid, OMA, OrthoFinder, OrthoInspector, orthoMCL, Panther, Phylome, RoundUp, TreeFam
45	FBgn0043362	bchs	FastLMM	0	1	0	0	0	0	0	FBGN0043362	bchs	33819	FBgn0043362	bchs	Human	23001	20751	WDFY3	15	14.75	high	Yes	Yes	Compara, eggNOG, Hieranoid, Homologene, Inparanoid, Isobase, OMA, OrthoDB, OrthoFinder, OrthoInspector, orthoMCL, Panther, Phylome, RoundUp, TreeFam
46	FBgn0035871	BI-1	FastLMM	0	1	0	0	0	0	0	FBGN0035871	BI-1	38936	FBgn0035871	BI-1	Human	7009	11723	TMBIM6	14	13.8	high	Yes	Yes	Compara, eggNOG, Hieranoid, Homologene, Inparanoid, OMA, OrthoDB, OrthoFinder, OrthoInspector, orthoMCL, Panther, Phylome, RoundUp, TreeFam
47	FBgn0264001	bru-3	FastLMM	0	1	0	0	0	0	0	FBGN0264001	bru3	39527	FBgn0264001	bru3	Human	60680	14058	CELF5	11	10.76	high	Yes	Yes	Compara, eggNOG, Hieranoid, Homologene, Inparanoid, OrthoDB, OrthoFinder, orthoMCL, Panther, Phylome, TreeFam
49	FBgn0285896	btl	FastLMM	0	0	1	0	1	0	0	FBGN0285896	btl	39564	FBgn0285896	btl	Human	2260	3688	FGFR1	12	11.87	high	Yes	Yes	eggNOG, Hieranoid, Inparanoid, OMA, OrthoDB, OrthoFinder, OrthoInspector, orthoMCL, Panther, Phylome, RoundUp, TreeFam
50	FBgn0266756	btsz	FastLMM	0	1	0	0	0	0	0	FBGN0266756	btsz	3346167	FBgn0266756	btsz	Human	94121	15588	SYTL4	10	9.75	high	Yes	Yes	eggNOG, Homologene, Isobase, OrthoFinder, OrthoInspector, orthoMCL, Panther, Phylome, RoundUp, TreeFam
51	FBgn0259822	Ca-beta	FastLMM	0	0	1	0	0	0	0	FBGN0259822	Ca-beta	34557	FBgn0259822	Ca-beta	Human	782	1401	CACNB1	12	11.79	high	Yes	Yes	Compara, eggNOG, Hieranoid, Inparanoid, OMA, OrthoFinder, OrthoInspector, orthoMCL, Panther, Phylome, RoundUp, TreeFam
51	FBgn0259822	Ca-beta	FastLMM	0	0	1	0	0	0	0	FBGN0259822	Ca-beta	34557	FBgn0259822	Ca-beta	Human	785	1404	CACNB4	12	11.76	high	Yes	Yes	Compara, eggNOG, Hieranoid, Homologene, Inparanoid, OMA, OrthoFinder, OrthoInspector, orthoMCL, Panther, Phylome, TreeFam
52	FBgn0010014	CanB	FastLMM	0	1	0	0	0	0	0	FBGN0010014	CanB	44317	FBgn0010014	CanB	Human	5534	9317	PPP3R1	12	11.97	high	Yes	Yes	eggNOG, Hieranoid, Homologene, Inparanoid, OMA, OrthoDB, OrthoFinder, OrthoInspector, Panther, Phylome, RoundUp, TreeFam
53	FBgn0015614	CanB2	FastLMM	0	0	0	0	0	0	1	FBGN0015614	CanB2	46456	FBgn0015614	CanB2	Human	5534	9317	PPP3R1	12	11.97	high	Yes	Yes	eggNOG, Hieranoid, Homologene, Inparanoid, OMA, OrthoDB, OrthoFinder, OrthoInspector, Panther, Phylome, RoundUp, TreeFam
54	FBgn0000256	capu	FastLMM	0	0	0	0	0	1	0	FBGN0000256	capu	33611	FBgn0000256	capu	Human	56776	14074	FMN2	8	7.94	high	Yes	Yes	eggNOG, Inparanoid, OrthoFinder, OrthoInspector, orthoMCL, Panther, RoundUp, TreeFam
55	FBgn0039590	CG10011	FastLMM	1	0	0	0	0	0	0	FBGN0039590	CG10011	43387	FBgn0039590	CG10011	Human	57182	29223	ANKRD50	11	10.78	high	Yes	Yes	Compara, eggNOG, Hieranoid, Inparanoid, OrthoFinder, OrthoInspector, orthoMCL, Panther, Phylome, RoundUp, TreeFam
57	FBgn0036277	CG10418	FastLMM	0	1	0	0	1	0	0	FBGN0036277	CG10418	39408	FBgn0036277	CG10418	Human	57819	13940	LSM2	13	12.89	high	Yes	Yes	Compara, eggNOG, Hieranoid, Homologene, Inparanoid, OMA, OrthoDB, OrthoFinder, OrthoInspector, orthoMCL, Panther, RoundUp, TreeFam
58	FBgn0035557	CG11353	FastLMM	0	0	1	0	0	0	0	FBGN0035557	CG11353	38560	FBgn0035557	CG11353	Human	112268211	NA	LOC112268211	2	2.01	high	Yes	Yes	OrthoDB, OrthoFinder
60	FBgn0034495	CG11788	FastLMM	0	0	0	1	0	0	0	FBGN0034495	CG11788	37295	FBgn0034495	CG11788	Human	79075	24453	DSCC1	14	13.8	high	Yes	Yes	Compara, eggNOG, Hieranoid, Homologene, Inparanoid, OMA, OrthoDB, OrthoFinder, OrthoInspector, orthoMCL, Panther, Phylome, RoundUp, TreeFam
63	FBgn0035285	CG12025	FastLMM	0	0	1	0	0	0	0	FBGN0035285	CG12025	38246	FBgn0035285	CG12025	Human	80194	26142	TMEM134	10	9.78	high	Yes	Yes	Compara, eggNOG, Inparanoid, OrthoFinder, OrthoInspector, orthoMCL, Panther, Phylome, RoundUp, TreeFam
69	FBgn0031897	CG13784	FastLMM	0	0	1	0	0	0	0	FBGN0031897	CG13784	34003	FBgn0031897	CG13784	Human	80148	26188	SLC66A2	11	10.79	high	Yes	Yes	Compara, eggNOG, Inparanoid, OMA, OrthoFinder, OrthoInspector, orthoMCL, Panther, Phylome, RoundUp, TreeFam
75	FBgn0031065	CG14234	FastLMM	1	0	0	0	0	0	0	FBGN0031065	CG14234	32988	FBgn0031065	CG14234	Human	130612	33704	TMEM198	13	12.8	high	Yes	Yes	Compara, eggNOG, Hieranoid, Inparanoid, OMA, OrthoDB, OrthoFinder, OrthoInspector, orthoMCL, Panther, Phylome, RoundUp, TreeFam
85	FBgn0061356	CG18003	FastLMM	1	0	0	0	0	0	0	FBGN0061356	CG18003	3771779	FBgn0061356	CG18003	Human	54363	4809	HAO1	14	13.8	high	Yes	Yes	Compara, eggNOG, Hieranoid, Homologene, Inparanoid, OMA, OrthoDB, OrthoFinder, OrthoInspector, orthoMCL, Panther, Phylome, RoundUp, TreeFam
86	FBgn0042132	CG18809	FastLMM	1	0	0	0	0	0	0	FBGN0042132	CG18809	59170	FBgn0042132	CG18809	Human	79002	28424	TRIR	8	7.8	high	Yes	Yes	eggNOG, OrthoFinder, OrthoInspector, orthoMCL, Panther, Phylome, RoundUp, TreeFam
95	FBgn0051760	CG31760	FastLMM	0	0	1	0	0	0	0	FBGN0051760	CG31760	34642	FBgn0051760	CG31760	Human	440435	31371	GPR179	7	6.84	high	Yes	Yes	eggNOG, OrthoFinder, OrthoInspector, orthoMCL, Panther, Phylome, RoundUp
97	FBgn0052506	CG32506	FastLMM	0	0	0	1	0	0	1	FBGN0052506	CG32506	318059	FBgn0052506	CG32506	Human	129049	29410	SGSM1	14	13.82	high	Yes	Yes	eggNOG, Hieranoid, Homologene, Inparanoid, Isobase, OMA, OrthoDB, OrthoFinder, OrthoInspector, orthoMCL, Panther, Phylome, RoundUp, TreeFam
98	FBgn0052638	CG32638	FastLMM	1	0	0	0	0	0	0	FBGN0052638	CG32638	318133	FBgn0052638	CG32638	Human	57085	13539	AGTRAP	12	11.9	high	Yes	Yes	Compara, eggNOG, Hieranoid, Inparanoid, OMA, OrthoDB, OrthoFinder, OrthoInspector, Panther, Phylome, RoundUp, TreeFam
99	FBgn0052645	CG32645	FastLMM	0	0	0	0	1	0	0	FBGN0052645	CG32645	32264	FBgn0052645	CG32645	Human	112268211	NA	LOC112268211	2	2.01	high	Yes	Yes	OrthoDB, OrthoFinder
100	FBgn0033093	CG3270	FastLMM	0	0	1	0	0	0	0	FBGN0033093	CG3270	35575	FBgn0033093	CG3270	Human	55572	26927	FOXRED1	13	12.8	high	Yes	Yes	Compara, eggNOG, Hieranoid, Inparanoid, OMA, OrthoDB, OrthoFinder, OrthoInspector, orthoMCL, Panther, Phylome, RoundUp, TreeFam
101	FBgn0053144	CG33144	FastLMM	1	1	0	0	0	0	0	FBGN0053144	CG33144	36131	FBgn0053144	CG33144	Human	9781	20457	RNF144A	10	9.75	high	Yes	Yes	eggNOG, Homologene, Isobase, OrthoFinder, OrthoInspector, orthoMCL, Panther, Phylome, RoundUp, TreeFam
102	FBgn0052831	CG33695	FastLMM	0	0	0	0	1	0	0	FBGN0052831	CG33695	3772186	FBgn0052831	CG33695	Human	124944	28737	C17orf49	9	8.73	high	Yes	Yes	Compara, eggNOG, OrthoFinder, OrthoInspector, orthoMCL, Panther, Phylome, RoundUp, TreeFam
103	FBgn0250851	CG33981	FastLMM	0	1	0	0	0	0	0	FBGN0250851	CG33981	3885654	FBgn0250851	CG33981	Human	25847	24540	ANAPC13	10	9.96	high	Yes	Yes	Hieranoid, Inparanoid, OMA, OrthoFinder, OrthoInspector, orthoMCL, Panther, Phylome, RoundUp, TreeFam
108	FBgn0034938	CG3803	FastLMM	0	0	0	0	0	0	1	FBGN0034938	CG3803	37809	FBgn0034938	CG3803	Human	1355	2263	COX15	14	13.8	high	Yes	Yes	Compara, eggNOG, Hieranoid, Homologene, Inparanoid, OMA, OrthoDB, OrthoFinder, OrthoInspector, orthoMCL, Panther, Phylome, RoundUp, TreeFam
113	FBgn0260388	CG42514	FastLMM	0	0	0	0	0	0	1	FBGN0260388	CG42514	8674108	FBgn0260388	CG42514	Human	57864	16055	SLC46A2	7	6.88	high	Yes	Yes	Compara, eggNOG, OrthoDB, OrthoFinder, Panther, Phylome, RoundUp
114	FBgn0261550	CG42668	FastLMM	0	0	0	1	0	0	0	FBGN0261550	CG42668	42412	FBgn0261550	CG42668	Human	114882	16396	OSBPL8	12	11.97	high	Yes	Yes	eggNOG, Hieranoid, Homologene, Inparanoid, OMA, OrthoDB, OrthoFinder, OrthoInspector, Panther, Phylome, RoundUp, TreeFam
114	FBgn0261550	CG42668	FastLMM	0	0	0	1	0	0	0	FBGN0261550	CG42668	42412	FBgn0261550	CG42668	Human	114879	16392	OSBPL5	12	11.9	high	Yes	Yes	Compara, eggNOG, Hieranoid, Inparanoid, OMA, OrthoDB, OrthoFinder, OrthoInspector, Panther, Phylome, RoundUp, TreeFam
115	FBgn0261802	CG42748	FastLMM	0	0	0	1	0	0	1	FBGN0261802	CG42748	35442	FBgn0261802	CG42748	Human	389813	37284	AJM1	6	5.94	high	Yes	Yes	eggNOG, OrthoFinder, OrthoInspector, Panther, Phylome, RoundUp
119	FBgn0034745	CG4329	FastLMM	0	0	0	0	0	0	1	FBGN0034745	CG4329	37582	FBgn0034745	CG4329	Human	149465	26485	CFAP57	14	13.8	high	Yes	Yes	Compara, eggNOG, Hieranoid, Homologene, Inparanoid, OMA, OrthoDB, OrthoFinder, OrthoInspector, orthoMCL, Panther, Phylome, RoundUp, TreeFam
126	FBgn0030778	CG4678	FastLMM	0	0	0	1	0	0	0	FBGN0030778	CG4678	32652	FBgn0030778	CG4678	Human	1368	2311	CPM	14	13.8	high	Yes	Yes	Compara, eggNOG, Hieranoid, Homologene, Inparanoid, OMA, OrthoDB, OrthoFinder, OrthoInspector, orthoMCL, Panther, Phylome, RoundUp, TreeFam
128	FBgn0039357	CG4743	FastLMM	0	1	0	0	0	0	0	FBGN0039357	CG4743	43101	FBgn0039357	CG4743	Human	115286	20661	SLC25A26	14	13.74	high	Yes	Yes	Compara, eggNOG, Hieranoid, Homologene, Inparanoid, Isobase, OMA, OrthoFinder, OrthoInspector, orthoMCL, Panther, Phylome, RoundUp, TreeFam
133	FBgn0030631	CG6227	FastLMM	0	0	0	0	1	0	0	FBGN0030631	CG6227	32464	FBgn0030631	CG6227	Human	9879	18681	DDX46	14	13.82	high	Yes	Yes	eggNOG, Hieranoid, Homologene, Inparanoid, Isobase, OMA, OrthoDB, OrthoFinder, OrthoInspector, orthoMCL, Panther, Phylome, RoundUp, TreeFam
135	FBgn0038921	CG6332	FastLMM	0	0	0	0	0	0	1	FBGN0038921	CG6332	42585	FBgn0038921	CG6332	Human	51298	13706	THEG	5	5.02	high	Yes	Yes	Compara, OrthoFinder, Panther, RoundUp, TreeFam
143	FBgn0035252	CG7970	FastLMM	0	0	0	0	0	1	0	FBGN0035252	CG7970	38205	FBgn0035252	CG7970	Human	5827	9716	PXMP2	7	7.05	high	Yes	Yes	eggNOG, Inparanoid, OMA, OrthoFinder, Panther, RoundUp, TreeFam
144	FBgn0037612	CG8112	FastLMM	0	1	0	0	1	0	0	FBGN0037612	CG8112	41033	FBgn0037612	CG8112	Human	6646	11177	SOAT1	15	14.75	high	Yes	Yes	Compara, eggNOG, Hieranoid, Homologene, Inparanoid, Isobase, OMA, OrthoDB, OrthoFinder, OrthoInspector, orthoMCL, Panther, Phylome, RoundUp, TreeFam
145	FBgn0037622	CG8202	FastLMM	0	0	0	0	1	0	0	FBGN0037622	CG8202	41043	FBgn0037622	CG8202	Human	57020	24641	VPS35L	14	13.8	high	Yes	Yes	Compara, eggNOG, Hieranoid, Homologene, Inparanoid, OMA, OrthoDB, OrthoFinder, OrthoInspector, orthoMCL, Panther, Phylome, RoundUp, TreeFam
146	FBgn0037720	CG8312	FastLMM	0	0	0	0	0	1	0	FBGN0037720	CG8312	41163	FBgn0037720	CG8312	Human	131583	26888	FAM43A	8	7.77	high	Yes	Yes	Compara, eggNOG, OrthoFinder, OrthoInspector, orthoMCL, Panther, Phylome, RoundUp
147	FBgn0031995	CG8475	FastLMM	0	0	0	1	0	0	0	FBGN0031995	CG8475	34114	FBgn0031995	CG8475	Human	5257	8927	PHKB	12	11.79	high	Yes	Yes	Compara, eggNOG, Homologene, Inparanoid, OMA, OrthoFinder, OrthoInspector, orthoMCL, Panther, Phylome, RoundUp, TreeFam
149	FBgn0033638	CG9005	FastLMM	0	0	0	0	1	0	0	FBGN0033638	CG9005	36243	FBgn0033638	CG9005	Human	56204	25609	FAM214A	8	8.04	high	Yes	Yes	eggNOG, Hieranoid, Inparanoid, OrthoFinder, OrthoInspector, Panther, RoundUp, TreeFam
150	FBgn0028847	CG9014	FastLMM	0	0	0	0	0	1	0	FBGN0028847	CG9014	34777	FBgn0028847	CG9014	Human	146310	23235	RNF151	5	4.94	high	Yes	Yes	Compara, eggNOG, OrthoDB, OrthoFinder, Panther
152	FBgn0034496	CG9143	FastLMM	0	0	0	1	0	0	0	FBGN0034496	CG9143	37296	FBgn0034496	CG9143	Human	57062	13266	DDX24	15	14.75	high	Yes	Yes	Compara, eggNOG, Hieranoid, Homologene, Inparanoid, Isobase, OMA, OrthoDB, OrthoFinder, OrthoInspector, orthoMCL, Panther, Phylome, RoundUp, TreeFam
154	FBgn0029939	CG9650	FastLMM	0	0	1	0	0	0	0	FBGN0029939	CG9650	31660	FBgn0029939	CG9650	Human	64919	13222	BCL11B	12	11.84	high	Yes	Yes	Compara, eggNOG, Hieranoid, Inparanoid, Isobase, OrthoDB, OrthoFinder, OrthoInspector, Panther, Phylome, RoundUp, TreeFam
155	FBgn0030775	CG9673	FastLMM	0	0	0	1	0	0	0	FBGN0030775	CG9673	32649	FBgn0030775	CG9673	Human	43849	6360	KLK12	3	2.84	high	Yes	Yes	Compara, eggNOG, OrthoDB
157	FBgn0034814	CG9890	FastLMM	0	0	0	0	0	1	0	FBGN0034814	CG9890	37659	FBgn0034814	CG9890	Human	11179	13070	ZNF277	15	14.75	high	Yes	Yes	Compara, eggNOG, Hieranoid, Homologene, Inparanoid, Isobase, OMA, OrthoDB, OrthoFinder, OrthoInspector, orthoMCL, Panther, Phylome, RoundUp, TreeFam
158	FBgn0031413	CG9967	FastLMM	0	0	0	1	0	0	0	FBGN0031413	CG9967	33414	FBgn0031413	CG9967	Human	100129480	40375	MKRN2OS	11	11.06	high	Yes	Yes	eggNOG, Hieranoid, Homologene, Inparanoid, OMA, OrthoDB, OrthoFinder, OrthoInspector, Panther, RoundUp, TreeFam
159	FBgn0029091	CS-2	FastLMM	0	0	0	0	1	0	0	FBGN0029091	Chs2	40442	FBgn0029091	Chs2	Human	3036	4818	HAS1	4	3.89	high	Yes	Yes	eggNOG, OrthoInspector, RoundUp, TreeFam
159	FBgn0029091	CS-2	FastLMM	0	0	0	0	1	0	0	FBGN0029091	Chs2	40442	FBgn0029091	Chs2	Human	3038	4820	HAS3	4	3.89	high	Yes	Yes	eggNOG, OrthoInspector, RoundUp, TreeFam
159	FBgn0029091	CS-2	FastLMM	0	0	0	0	1	0	0	FBGN0029091	Chs2	40442	FBgn0029091	Chs2	Human	3037	4819	HAS2	4	3.89	high	Yes	Yes	eggNOG, OrthoInspector, RoundUp, TreeFam
161	FBgn0262582	cic	FastLMM	0	0	0	1	0	0	0	FBGN0262582	cic	53560	FBgn0262582	cic	Human	23152	14214	CIC	12	11.79	high	Yes	Yes	Compara, eggNOG, Hieranoid, Inparanoid, OrthoDB, OrthoFinder, OrthoInspector, orthoMCL, Panther, Phylome, RoundUp, TreeFam
164	FBgn0000352	cos	FastLMM	0	0	0	0	0	0	1	FBGN0000352	cos	35653	FBgn0000352	cos	Human	55582	18632	KIF27	3	2.92	high	Yes	Yes	OMA, OrthoFinder, Phylome
164	FBgn0000352	cos	FastLMM	0	0	0	0	0	0	1	FBGN0000352	cos	35653	FBgn0000352	cos	Human	374654	30497	KIF7	3	2.87	high	Yes	Yes	Isobase, OMA, Phylome
165	FBgn0031066	CoVIb	FastLMM	1	0	0	0	0	0	0	FBGN0031066	COX6B	32989	FBgn0031066	COX6B	Human	1340	2280	COX6B1	13	12.81	high	Yes	Yes	eggNOG, Hieranoid, Homologene, Inparanoid, Isobase, OMA, OrthoFinder, OrthoInspector, orthoMCL, Panther, Phylome, RoundUp, TreeFam
169	FBgn0261437	CSN8	FastLMM	0	0	0	0	0	0	1	FBGN0261437	CSN8	49077	FBgn0261437	CSN8	Human	10920	24335	COPS8	12	11.84	high	Yes	Yes	eggNOG, Hieranoid, Homologene, Inparanoid, OMA, OrthoDB, OrthoFinder, OrthoInspector, orthoMCL, Panther, Phylome, TreeFam
170	FBgn0025674	CycK	FastLMM	1	0	0	1	0	0	1	FBGN0025674	CycK	49816	FBgn0025674	CycK	Human	8812	1596	CCNK	11	10.71	high	Yes	Yes	Compara, eggNOG, Inparanoid, Isobase, OrthoDB, OrthoFinder, OrthoInspector, orthoMCL, Panther, Phylome, TreeFam
173	FBgn0015926	dah	FastLMM	0	0	0	0	1	0	0	FBGN0015926	dah	32459	FBgn0015926	dah	Human	391475	23279	DYTN	5	4.92	high	Yes	Yes	eggNOG, Inparanoid, Panther, Phylome, TreeFam
174	FBgn0263930	dally	FastLMM	0	1	0	0	0	0	0	FBGN0263930	dally	39013	FBgn0263930	dally	Human	2262	4453	GPC5	14	13.72	high	Yes	Yes	Compara, eggNOG, Hieranoid, Homologene, Inparanoid, Isobase, OMA, OrthoDB, OrthoFinder, OrthoInspector, orthoMCL, Panther, Phylome, TreeFam
176	FBgn0051646	CG31646	FastLMM	0	0	0	0	0	0	1	FBGN0051646	DIP-theta	33795	FBgn0051646	DIP-theta	Human	50863	17941	NTM	8	7.89	high	Yes	Yes	eggNOG, Hieranoid, Inparanoid, OrthoDB, OrthoFinder, OrthoInspector, orthoMCL, RoundUp
178	FBgn0053196	dp	FastLMM	0	0	0	0	0	1	0	FBGN0053196	dpy	318824	FBgn0053196	dpy	Human	2201	3604	FBN2	4	3.94	high	Yes	Yes	eggNOG, OrthoDB, OrthoInspector, RoundUp
179	FBgn0024732	Drep-1	FastLMM	0	0	0	0	0	1	0	FBGN0024732	Drep1	36290	FBgn0024732	Drep1	Human	1149	1976	CIDEA	7	6.92	high	Yes	Yes	Compara, eggNOG, OrthoFinder, OrthoInspector, Panther, RoundUp, TreeFam
179	FBgn0024732	Drep-1	FastLMM	0	0	0	0	0	1	0	FBGN0024732	Drep1	36290	FBgn0024732	Drep1	Human	63924	24229	CIDEC	7	6.92	high	Yes	Yes	Compara, eggNOG, OrthoFinder, OrthoInspector, Panther, RoundUp, TreeFam
180	FBgn0028407	Drep-3	FastLMM	0	0	0	0	0	1	0	FBGN0028407	Drep3	36292	FBgn0028407	Drep3	Human	1149	1976	CIDEA	7	6.89	high	Yes	Yes	Compara, eggNOG, Hieranoid, OrthoFinder, OrthoInspector, Panther, TreeFam
180	FBgn0028407	Drep-3	FastLMM	0	0	0	0	0	1	0	FBGN0028407	Drep3	36292	FBgn0028407	Drep3	Human	63924	24229	CIDEC	7	6.89	high	Yes	Yes	Compara, eggNOG, Hieranoid, OrthoFinder, OrthoInspector, Panther, TreeFam
181	FBgn0033159	Dscam	FastLMM	0	0	0	0	0	0	1	FBGN0033159	Dscam1	35652	FBgn0033159	Dscam1	Human	57453	14656	DSCAML1	13	12.87	high	Yes	Yes	eggNOG, Hieranoid, Homologene, Inparanoid, OMA, OrthoDB, OrthoFinder, OrthoInspector, orthoMCL, Panther, Phylome, RoundUp, TreeFam
182	FBgn0016930	smi35A	FastLMM	0	0	0	0	0	0	1	FBGN0016930	Dyrk2	34831	FBgn0016930	Dyrk2	Human	8798	3095	DYRK4	12	11.79	high	Yes	Yes	Compara, eggNOG, Homologene, Inparanoid, OrthoDB, OrthoFinder, OrthoInspector, orthoMCL, Panther, Phylome, RoundUp, TreeFam
183	FBgn0260003	Dys	FastLMM	0	0	0	0	1	0	0	FBGN0260003	Dys	42327	FBgn0260003	Dys	Human	1756	2928	DMD	11	10.76	high	Yes	Yes	eggNOG, Hieranoid, Homologene, Inparanoid, OMA, OrthoFinder, OrthoInspector, orthoMCL, Phylome, RoundUp, TreeFam
184	FBgn0264006	dysc	FastLMM	0	0	0	0	1	0	0	FBGN0264006	dysc	39533	FBgn0264006	dysc	Human	25861	16361	WHRN	11	10.91	high	Yes	Yes	eggNOG, Hieranoid, Inparanoid, OMA, OrthoDB, OrthoFinder, OrthoInspector, orthoMCL, Panther, Phylome, RoundUp
185	FBgn0035624	Eaf6	FastLMM	0	0	0	0	0	1	0	FBGN0035624	Eaf6	38637	FBgn0035624	Eaf6	Human	64769	25674	MEAF6	10	9.74	high	Yes	Yes	Compara, eggNOG, OrthoDB, OrthoFinder, OrthoInspector, orthoMCL, Panther, Phylome, RoundUp, TreeFam
186	FBgn0000536	eas	FastLMM	0	0	0	1	0	0	0	FBGN0000536	eas	32585	FBgn0000536	eas	Human	55500	24649	ETNK1	14	13.8	high	Yes	Yes	Compara, eggNOG, Hieranoid, Homologene, Inparanoid, OMA, OrthoDB, OrthoFinder, OrthoInspector, orthoMCL, Panther, Phylome, RoundUp, TreeFam
187	FBgn0000542	ec	FastLMM	0	1	0	0	0	0	0	FBGN0000542	ec	31339	FBgn0000542	ec	Human	159195	23513	USP54	6	5.93	high	Yes	Yes	eggNOG, OrthoFinder, OrthoInspector, orthoMCL, Panther, RoundUp
189	FBgn0026259	eIF5B	FastLMM	0	1	0	0	0	0	0	FBGN0026259	eIF5B	44261	FBgn0026259	eIF5B	Human	9669	30793	EIF5B	13	12.82	high	Yes	Yes	eggNOG, Hieranoid, Inparanoid, Isobase, OMA, OrthoDB, OrthoFinder, OrthoInspector, orthoMCL, Panther, Phylome, RoundUp, TreeFam
191	FBgn0039225	Ets96B	FastLMM	0	0	1	0	0	0	0	FBGN0039225	Ets96B	42952	FBgn0039225	Ets96B	Human	2115	3490	ETV1	7	6.89	high	Yes	Yes	eggNOG, OrthoFinder, OrthoInspector, orthoMCL, Panther, RoundUp, TreeFam
192	FBgn0266084	Fhos	FastLMM	0	0	1	0	0	0	0	FBGN0266084	Fhos	39004	FBgn0266084	Fhos	Human	80206	26178	FHOD3	8	7.99	high	Yes	Yes	eggNOG, Hieranoid, Inparanoid, OrthoFinder, OrthoInspector, Panther, Phylome, RoundUp
192	FBgn0266084	Fhos	FastLMM	0	0	1	0	0	0	0	FBGN0266084	Fhos	39004	FBgn0266084	Fhos	Human	29109	17905	FHOD1	8	7.94	high	Yes	Yes	eggNOG, Hieranoid, Homologene, OrthoFinder, OrthoInspector, Panther, Phylome, RoundUp
194	FBgn0031815	frj	FastLMM	0	1	0	0	0	0	0	FBGN0031815	frj	33900	FBgn0031815	frj	Human	79143	15505	MBOAT7	14	13.74	high	Yes	Yes	Compara, eggNOG, Hieranoid, Homologene, Inparanoid, Isobase, OMA, OrthoFinder, OrthoInspector, orthoMCL, Panther, Phylome, RoundUp, TreeFam
196	FBgn0001078	ftz-f1	FastLMM	0	1	0	0	0	0	0	FBGN0001078	ftz-f1	40045	FBgn0001078	ftz-f1	Human	2516	7983	NR5A1	11	10.84	high	Yes	Yes	Compara, eggNOG, Inparanoid, Isobase, OrthoDB, OrthoFinder, OrthoInspector, Panther, Phylome, RoundUp, TreeFam
196	FBgn0001078	ftz-f1	FastLMM	0	1	0	0	0	0	0	FBGN0001078	ftz-f1	40045	FBgn0001078	ftz-f1	Human	2494	7984	NR5A2	11	10.79	high	Yes	Yes	Compara, eggNOG, Inparanoid, OrthoDB, OrthoFinder, OrthoInspector, orthoMCL, Panther, Phylome, RoundUp, TreeFam
197	FBgn0285958	Fuca	FastLMM	0	0	1	0	0	0	0	FBGN0285958	Fuca	3772574	FBgn0285958	Fuca	Human	2519	4008	FUCA2	12	11.83	high	Yes	Yes	Compara, eggNOG, Hieranoid, Homologene, Inparanoid, OMA, OrthoFinder, OrthoInspector, orthoMCL, Panther, Phylome, RoundUp
198	FBgn0004509	Fur1	FastLMM	0	0	1	0	0	0	0	FBGN0004509	Fur1	47220	FBgn0004509	Fur1	Human	5045	8568	FURIN	10	9.76	high	Yes	Yes	eggNOG, Isobase, OMA, OrthoFinder, OrthoInspector, orthoMCL, Panther, Phylome, RoundUp, TreeFam
201	FBgn0001098	Gdh	FastLMM	0	0	0	1	0	0	0	FBGN0001098	Gdh	42832	FBgn0001098	Gdh	Human	2746	4335	GLUD1	15	14.75	high	Yes	Yes	Compara, eggNOG, Hieranoid, Homologene, Inparanoid, Isobase, OMA, OrthoDB, OrthoFinder, OrthoInspector, orthoMCL, Panther, Phylome, RoundUp, TreeFam
202	FBgn0027657	glob1	FastLMM	1	0	0	0	0	0	0	FBGN0027657	glob1	41930	FBgn0027657	glob1	Human	114757	16505	CYGB	9	8.67	high	Yes	Yes	Compara, eggNOG, Inparanoid, Isobase, OrthoFinder, OrthoInspector, orthoMCL, Phylome, RoundUp
203	FBgn0005674	Aats-glupro	FastLMM	0	0	1	0	0	0	0	FBGN0005674	GluProRS	42834	FBgn0005674	GluProRS	Human	2058	3418	EPRS	13	12.74	high	Yes	Yes	Compara, eggNOG, Hieranoid, Inparanoid, Isobase, OMA, OrthoFinder, OrthoInspector, orthoMCL, Panther, Phylome, RoundUp, TreeFam
204	FBgn0264000	GluRIB	FastLMM	0	0	0	0	0	1	0	FBGN0264000	GluRIB	44484	FBgn0264000	GluRIB	Human	2893	4574	GRIA4	12	11.81	high	Yes	Yes	Compara, eggNOG, Hieranoid, Inparanoid, Isobase, OMA, OrthoDB, OrthoFinder, OrthoInspector, orthoMCL, Panther, TreeFam
205	FBgn0046113	GluRIIC	FastLMM	0	0	0	0	1	0	0	FBGN0046113	GluRIIC	33275	FBgn0046113	GluRIIC	Human	2895	4576	GRID2	4	3.88	high	Yes	Yes	Compara, eggNOG, Isobase, Panther
206	FBgn0264574	Glut1	FastLMM	0	0	1	0	0	0	0	FBGN0264574	Glut1	38109	FBgn0264574	Glut1	Human	6515	11007	SLC2A3	10	10.01	high	Yes	Yes	eggNOG, Homologene, Inparanoid, OMA, OrthoDB, OrthoFinder, OrthoInspector, Panther, Phylome, RoundUp
206	FBgn0264574	Glut1	FastLMM	0	0	1	0	0	0	0	FBGN0264574	Glut1	38109	FBgn0264574	Glut1	Human	6513	11005	SLC2A1	10	9.96	high	Yes	Yes	eggNOG, Inparanoid, Isobase, OMA, OrthoDB, OrthoFinder, OrthoInspector, Panther, Phylome, RoundUp
208	FBgn0035142	hipk	FastLMM	0	0	0	0	0	0	1	FBGN0035142	Hipk	38070	FBgn0035142	Hipk	Human	28996	14402	HIPK2	12	11.81	high	Yes	Yes	eggNOG, Hieranoid, Inparanoid, Isobase, OrthoDB, OrthoFinder, OrthoInspector, orthoMCL, Panther, Phylome, RoundUp, TreeFam
208	FBgn0035142	hipk	FastLMM	0	0	0	0	0	0	1	FBGN0035142	Hipk	38070	FBgn0035142	Hipk	Human	10114	4915	HIPK3	12	11.79	high	Yes	Yes	Compara, eggNOG, Hieranoid, Inparanoid, OrthoDB, OrthoFinder, OrthoInspector, orthoMCL, Panther, Phylome, RoundUp, TreeFam
209	FBgn0034012	Hr51	FastLMM	0	0	0	0	1	0	0	FBGN0034012	Hr51	36702	FBgn0034012	Hr51	Human	10002	7974	NR2E3	12	11.84	high	Yes	Yes	Compara, eggNOG, Hieranoid, Homologene, Inparanoid, OMA, OrthoDB, OrthoFinder, orthoMCL, Panther, Phylome, RoundUp
210	FBgn0038922	CG6439	FastLMM	0	0	0	0	0	0	1	FBGN0038922	Idh3b	42586	FBgn0038922	Idh3b	Human	3420	5385	IDH3B	15	14.75	high	Yes	Yes	Compara, eggNOG, Hieranoid, Homologene, Inparanoid, Isobase, OMA, OrthoDB, OrthoFinder, OrthoInspector, orthoMCL, Panther, Phylome, RoundUp, TreeFam
211	FBgn0027086	Aats-ile	FastLMM	0	0	0	0	0	1	0	FBGN0027086	IleRS	45785	FBgn0027086	IleRS	Human	3376	5330	IARS	14	13.79	high	Yes	Yes	Compara, eggNOG, Hieranoid, Homologene, Inparanoid, Isobase, OMA, OrthoDB, OrthoFinder, OrthoInspector, orthoMCL, Panther, Phylome, RoundUp
213	FBgn0052082	CG32082	FastLMM	0	0	0	1	0	0	0	FBGN0052082	IRSp53	39258	FBgn0052082	IRSp53	Human	10458	947	BAIAP2	10	9.89	high	Yes	Yes	Compara, Inparanoid, OMA, OrthoFinder, OrthoInspector, orthoMCL, Panther, Phylome, RoundUp, TreeFam
215	FBgn0015396	jumu	FastLMM	0	0	0	1	0	0	1	FBGN0015396	jumu	41265	FBgn0015396	jumu	Human	121643	21399	FOXN4	7	6.99	high	Yes	Yes	eggNOG, Hieranoid, OrthoFinder, OrthoInspector, Panther, RoundUp, TreeFam
217	FBgn0027596	CG10249	FastLMM	0	0	0	0	0	0	1	FBGN0027596	Kank	36668	FBgn0027596	Kank	Human	25959	29300	KANK2	10	9.86	high	Yes	Yes	Compara, eggNOG, Hieranoid, Inparanoid, OrthoDB, OrthoFinder, OrthoInspector, Panther, Phylome, TreeFam
217	FBgn0027596	CG10249	FastLMM	0	0	0	0	0	0	1	FBGN0027596	Kank	36668	FBgn0027596	Kank	Human	23189	19309	KANK1	10	9.79	high	Yes	Yes	Compara, eggNOG, Inparanoid, OrthoDB, OrthoInspector, orthoMCL, Panther, Phylome, RoundUp, TreeFam
218	FBgn0001321	knk	FastLMM	0	1	0	0	0	0	0	FBGN0001321	knk	47137	FBgn0001321	knk	Human	7056	11784	THBD	2	2.03	high	Yes	Yes	Compara, Panther
220	FBgn0086372	lap	FastLMM	0	0	0	0	0	0	1	FBGN0086372	lap	40863	FBgn0086372	lap	Human	8301	15514	PICALM	14	13.74	high	Yes	Yes	Compara, eggNOG, Hieranoid, Homologene, Inparanoid, Isobase, OrthoDB, OrthoFinder, OrthoInspector, orthoMCL, Panther, Phylome, RoundUp, TreeFam
221	FBgn0000464	Lar	FastLMM	0	0	0	0	0	0	1	FBGN0000464	Lar	35259	FBgn0000464	Lar	Human	5789	9668	PTPRD	12	11.86	high	Yes	Yes	eggNOG, Hieranoid, Homologene, Inparanoid, OMA, OrthoFinder, OrthoInspector, orthoMCL, Panther, Phylome, RoundUp, TreeFam
222	FBgn0261565	Lmpt	FastLMM	0	0	1	0	0	0	0	FBGN0261565	Lmpt	39889	FBgn0261565	Lmpt	Human	2274	3703	FHL2	3	2.98	high	Yes	Yes	Homologene, Isobase, RoundUp
223	FBgn0052105	CG32105	FastLMM	0	1	0	0	1	0	0	FBGN0052105	Lmx1a	39406	FBgn0052105	Lmx1a	Human	4010	6654	LMX1B	12	11.84	high	Yes	Yes	Compara, eggNOG, Hieranoid, Inparanoid, Isobase, OrthoDB, OrthoFinder, OrthoInspector, Panther, Phylome, RoundUp, TreeFam
233	FBgn0034540	Lrt	FastLMM	0	0	0	0	0	0	1	FBGN0034540	Lrt	37342	FBgn0034540	Lrt	Human	349667	23053	RTN4RL2	2	2.03	high	Yes	Yes	OrthoFinder, RoundUp
234	FBgn0015513	mbc	FastLMM	0	0	0	1	0	0	0	FBGN0015513	mbc	42817	FBgn0015513	mbc	Human	1793	2987	DOCK1	13	12.87	high	Yes	Yes	eggNOG, Hieranoid, Homologene, Inparanoid, OMA, OrthoDB, OrthoFinder, OrthoInspector, orthoMCL, Panther, Phylome, RoundUp, TreeFam
235	FBgn0011656	Mef2	FastLMM	0	0	0	0	0	1	0	FBGN0011656	Mef2	36032	FBgn0011656	Mef2	Human	4208	6996	MEF2C	11	10.96	high	Yes	Yes	eggNOG, Hieranoid, Homologene, Inparanoid, OMA, OrthoFinder, OrthoInspector, Panther, Phylome, RoundUp, TreeFam
235	FBgn0011656	Mef2	FastLMM	0	0	0	0	0	1	0	FBGN0011656	Mef2	36032	FBgn0011656	Mef2	Human	4205	6993	MEF2A	11	10.86	high	Yes	Yes	eggNOG, Hieranoid, Inparanoid, OMA, OrthoFinder, OrthoInspector, orthoMCL, Panther, Phylome, RoundUp, TreeFam
236	FBgn0026206	mei-P26	FastLMM	0	0	1	0	0	0	0	FBGN0026206	mei-P26	45775	FBgn0026206	mei-P26	Human	81844	19028	TRIM56	4	3.96	high	Yes	Yes	eggNOG, Isobase, OrthoDB, Panther
237	FBgn0051004	CG31004	FastLMM	0	0	1	0	0	0	0	FBGN0051004	mesh	43688	FBgn0051004	mesh	Human	56241	30667	SUSD2	13	12.73	high	Yes	Yes	Compara, eggNOG, Hieranoid, Homologene, Inparanoid, Isobase, OrthoFinder, OrthoInspector, orthoMCL, Panther, Phylome, RoundUp, TreeFam
238	FBgn0266757	mfr	FastLMM	0	0	0	0	0	0	1	FBGN0266757	mfr	39016	FBgn0266757	mfr	Human	654463	28065	FER1L6	13	12.8	high	Yes	Yes	Compara, eggNOG, Hieranoid, Homologene, Inparanoid, OMA, OrthoDB, OrthoInspector, orthoMCL, Panther, Phylome, RoundUp, TreeFam
247	FBgn0259481	Mob2	FastLMM	0	0	0	0	1	0	0	FBGN0259481	Mob2	39293	FBgn0259481	Mob2	Human	81532	24904	MOB2	8	7.85	high	Yes	Yes	eggNOG, OrthoDB, OrthoFinder, OrthoInspector, orthoMCL, Panther, Phylome, RoundUp
248	FBgn0259483	Mob4	FastLMM	0	0	1	0	0	0	0	FBGN0259483	Mob4	35576	FBgn0259483	Mob4	Human	25843	17261	MOB4	13	12.79	high	Yes	Yes	Compara, eggNOG, Hieranoid, Homologene, Inparanoid, OrthoDB, OrthoFinder, OrthoInspector, orthoMCL, Panther, Phylome, RoundUp, TreeFam
249	FBgn0260660	mp	FastLMM	0	0	0	1	0	0	0	FBGN0260660	Mp	38769	FBgn0260660	Mp	Human	1306	2192	COL15A1	8	7.81	high	Yes	Yes	eggNOG, Hieranoid, Homologene, OrthoDB, OrthoFinder, Phylome, RoundUp, TreeFam
252	FBgn0259735	CG42389	FastLMM	0	0	0	0	0	0	1	FBGN0259735	CG42389	34987	FBgn0259735	mtgo	Human	22862	20296	FNDC3A	12	11.78	high	Yes	Yes	Compara, eggNOG, Hieranoid, Homologene, Inparanoid, OrthoFinder, OrthoInspector, orthoMCL, Panther, Phylome, RoundUp, TreeFam
254	FBgn0031000	Muc18B	FastLMM	0	0	0	1	0	0	1	FBGN0031000	Muc18B	32913	FBgn0031000	Muc18B	Human	285834	27780	HCG22	3	3.03	high	Yes	Yes	OrthoFinder, OrthoInspector, RoundUp
257	FBgn0036801	MYPT-75D	FastLMM	0	0	0	0	0	1	0	FBGN0036801	MYPT-75D	40032	FBgn0036801	MYPT-75D	Human	84988	14941	PPP1R16A	12	11.79	high	Yes	Yes	Compara, eggNOG, Hieranoid, Inparanoid, OrthoDB, OrthoFinder, OrthoInspector, orthoMCL, Panther, Phylome, RoundUp, TreeFam
257	FBgn0036801	MYPT-75D	FastLMM	0	0	0	0	0	1	0	FBGN0036801	MYPT-75D	40032	FBgn0036801	MYPT-75D	Human	26051	15850	PPP1R16B	12	11.79	high	Yes	Yes	Compara, eggNOG, Hieranoid, Inparanoid, OrthoDB, OrthoFinder, OrthoInspector, orthoMCL, Panther, Phylome, RoundUp, TreeFam
259	FBgn0083963	CG34127	FastLMM	0	0	1	0	0	0	0	FBGN0083963	Nlg3	40912	FBgn0083963	Nlg3	Human	54413	14289	NLGN3	12	11.9	high	Yes	Yes	Compara, eggNOG, Hieranoid, Inparanoid, OMA, OrthoDB, OrthoFinder, OrthoInspector, Panther, Phylome, RoundUp, TreeFam
263	FBgn0085424	nub	FastLMM	0	0	1	0	0	0	0	FBGN0085424	nub	34669	FBgn0085424	nub	Human	5452	9213	POU2F2	7	7.01	high	Yes	Yes	Compara, eggNOG, Hieranoid, Inparanoid, OrthoInspector, Panther, RoundUp
263	FBgn0085424	nub	FastLMM	0	0	1	0	0	0	0	FBGN0085424	nub	34669	FBgn0085424	nub	Human	5451	9212	POU2F1	7	6.98	high	Yes	Yes	eggNOG, Hieranoid, Inparanoid, OrthoInspector, orthoMCL, Panther, RoundUp
264	FBgn0039004	Nup133	FastLMM	0	1	0	0	0	0	0	FBGN0039004	Nup133	42680	FBgn0039004	Nup133	Human	55746	18016	NUP133	14	13.8	high	Yes	Yes	Compara, eggNOG, Hieranoid, Homologene, Inparanoid, OMA, OrthoDB, OrthoFinder, OrthoInspector, orthoMCL, Panther, Phylome, RoundUp, TreeFam
266	FBgn0038653	CG18208	FastLMM	0	1	0	0	1	0	0	FBGN0038653	Octalpha2R	42258	FBgn0038653	Octalpha2R	Human	150	281	ADRA2A	7	7	high	Yes	Yes	eggNOG, Homologene, Inparanoid, OMA, Panther, Phylome, RoundUp
268	FBgn0004839	otk	FastLMM	0	0	0	0	0	1	0	FBGN0004839	otk	36283	FBgn0004839	otk	Human	5754	9618	PTK7	14	13.75	high	Yes	Yes	Compara, eggNOG, Hieranoid, Homologene, Inparanoid, Isobase, OMA, OrthoDB, OrthoInspector, orthoMCL, Panther, Phylome, RoundUp, TreeFam
269	FBgn0037618	CG11762	FastLMM	0	0	0	0	1	0	0	FBGN0037618	ouib	41039	FBgn0037618	ouib	Human	23528	13075	ZNF281	2	2.01	high	Yes	Yes	Panther, Phylome
270	FBgn0029878	Pat1	FastLMM	0	0	0	0	0	0	1	FBGN0029878	Pat1	31593	FBgn0029878	Pat1	Human	10513	622	APPBP2	14	13.82	high	Yes	Yes	eggNOG, Hieranoid, Homologene, Inparanoid, Isobase, OMA, OrthoDB, OrthoFinder, OrthoInspector, orthoMCL, Panther, Phylome, RoundUp, TreeFam
272	FBgn0033564	Pex6	FastLMM	1	0	0	0	0	0	0	FBGN0033564	Pex6	3772165	FBgn0033564	Pex6	Human	5190	8859	PEX6	11	10.79	high	Yes	Yes	Compara, eggNOG, Inparanoid, OrthoDB, OrthoFinder, OrthoInspector, orthoMCL, Panther, Phylome, RoundUp, TreeFam
273	FBgn0050463	CG30463	FastLMM	0	0	1	0	0	0	0	FBGN0050463	CG30463	246627	FBgn0050463	Pgant9	Human	79695	19877	GALNT12	6	5.79	high	Yes	Yes	Compara, eggNOG, Hieranoid, Isobase, Panther, Phylome
274	FBgn0264953	Piezo	FastLMM	1	0	0	0	0	0	0	FBGN0264953	Piezo	34112	FBgn0264953	Piezo	Human	63895	26270	PIEZO2	13	12.9	high	Yes	Yes	Compara, eggNOG, Hieranoid, Homologene, Inparanoid, OMA, OrthoDB, OrthoFinder, OrthoInspector, Panther, Phylome, RoundUp, TreeFam
275	FBgn0003089	pip	FastLMM	1	0	0	0	0	0	0	FBGN0003089	pip	40104	FBgn0003089	pip	Human	10090	17223	UST	5	4.8	high	Yes	Yes	Compara, eggNOG, Panther, Phylome, TreeFam
276	FBgn0031069	Pmp70	FastLMM	0	1	0	0	0	0	0	FBGN0031069	Pmp70	32992	FBgn0031069	Pmp70	Human	5825	67	ABCD3	15	14.75	high	Yes	Yes	Compara, eggNOG, Hieranoid, Homologene, Inparanoid, Isobase, OMA, OrthoDB, OrthoFinder, OrthoInspector, orthoMCL, Panther, Phylome, RoundUp, TreeFam
277	FBgn0029903	pod1	FastLMM	0	0	0	0	0	1	0	FBGN0029903	pod1	31620	FBgn0029903	pod1	Human	100529144	44424	CORO7-PAM16	11	10.87	high	Yes	Yes	eggNOG, Hieranoid, Homologene, Inparanoid, OMA, OrthoDB, OrthoFinder, OrthoInspector, Phylome, RoundUp, TreeFam
279	FBgn0032358	Ppt2	FastLMM	0	0	0	0	1	0	0	FBGN0032358	Ppt2	34564	FBgn0032358	Ppt2	Human	9374	9326	PPT2	13	12.87	high	Yes	Yes	eggNOG, Hieranoid, Homologene, Inparanoid, OMA, OrthoDB, OrthoFinder, OrthoInspector, orthoMCL, Panther, Phylome, RoundUp, TreeFam
280	FBgn0004595	pros	FastLMM	0	0	0	0	0	1	0	FBGN0004595	pros	41363	FBgn0004595	pros	Human	5629	9459	PROX1	10	9.78	high	Yes	Yes	Compara, eggNOG, Hieranoid, Isobase, OrthoFinder, OrthoInspector, Panther, Phylome, RoundUp, TreeFam
281	FBgn0003169	put	FastLMM	0	0	1	0	0	0	0	FBGN0003169	put	41772	FBgn0003169	put	Human	92	173	ACVR2A	12	11.81	high	Yes	Yes	Compara, eggNOG, Hieranoid, Homologene, Inparanoid, OMA, OrthoDB, OrthoFinder, OrthoInspector, orthoMCL, Panther, Phylome
281	FBgn0003169	put	FastLMM	0	0	1	0	0	0	0	FBGN0003169	put	41772	FBgn0003169	put	Human	93	174	ACVR2B	12	11.78	high	Yes	Yes	Compara, eggNOG, Hieranoid, Inparanoid, Isobase, OMA, OrthoFinder, OrthoInspector, orthoMCL, Panther, Phylome, RoundUp
283	FBgn0014009	Rab2	FastLMM	0	0	1	0	0	0	0	FBGN0014009	Rab2	35577	FBgn0014009	Rab2	Human	5862	9763	RAB2A	13	12.89	high	Yes	Yes	Compara, eggNOG, Hieranoid, Homologene, Inparanoid, Isobase, OMA, OrthoDB, OrthoFinder, OrthoInspector, Panther, Phylome, RoundUp
284	FBgn0015286	Rala	FastLMM	0	1	0	0	0	0	0	FBGN0015286	Rala	31332	FBgn0015286	Rala	Human	5898	9839	RALA	13	12.87	high	Yes	Yes	eggNOG, Hieranoid, Homologene, Inparanoid, OMA, OrthoDB, OrthoFinder, OrthoInspector, orthoMCL, Panther, Phylome, RoundUp, TreeFam
285	FBgn0031816	CG16947	FastLMM	0	1	0	0	0	0	0	FBGN0031816	Rchy1	33901	FBgn0031816	Rchy1	Human	25898	17479	RCHY1	11	10.7	high	Yes	Yes	Compara, eggNOG, Homologene, Inparanoid, Isobase, OrthoFinder, OrthoInspector, orthoMCL, Panther, Phylome, TreeFam
286	FBgn0004244	Rdl	FastLMM	0	0	0	1	0	0	1	FBGN0004244	Rdl	39054	FBgn0004244	Rdl	Human	2568	4089	GABRP	4	3.96	high	Yes	Yes	eggNOG, Isobase, OrthoDB, Panther
287	FBgn0264493	rdx	FastLMM	1	1	0	0	1	0	0	FBGN0264493	rdx	41704	FBgn0264493	rdx	Human	8405	11254	SPOP	10	9.81	high	Yes	Yes	eggNOG, Homologene, OMA, OrthoFinder, OrthoInspector, orthoMCL, Panther, Phylome, RoundUp, TreeFam
288	FBgn0285913	CG12207	FastLMM	0	0	0	0	0	0	1	FBGN0285913	red	41738	FBgn0285913	red	Human	256586	28571	LYSMD2	8	7.91	high	Yes	Yes	OrthoDB, OrthoFinder, OrthoInspector, orthoMCL, Panther, Phylome, RoundUp, TreeFam
289	FBgn0020379	Rfx	FastLMM	0	1	0	1	0	0	1	FBGN0020379	Rfx	41266	FBgn0020379	Rfx	Human	5991	9984	RFX3	13	12.79	high	Yes	Yes	Compara, eggNOG, Hieranoid, Homologene, Inparanoid, OrthoDB, OrthoFinder, OrthoInspector, orthoMCL, Panther, Phylome, RoundUp, TreeFam
290	FBgn0028699	Rh50	FastLMM	0	0	0	0	1	0	0	FBGN0028699	Rh50	38589	FBgn0028699	Rh50	Human	57127	14572	RHBG	14	13.74	high	Yes	Yes	Compara, eggNOG, Hieranoid, Homologene, Inparanoid, Isobase, OrthoDB, OrthoFinder, OrthoInspector, orthoMCL, Panther, Phylome, RoundUp, TreeFam
291	FBgn0031118	RhoGAP19D	FastLMM	0	0	0	0	0	0	1	FBGN0031118	RhoGAP19D	33048	FBgn0031118	RhoGAP19D	Human	57636	29293	ARHGAP23	8	7.77	high	Yes	Yes	Compara, eggNOG, Inparanoid, OrthoFinder, OrthoInspector, orthoMCL, RoundUp, TreeFam
292	FBgn0035574	Gef64C	FastLMM	0	1	0	0	0	0	0	FBGN0035574	RhoGEF64C	38578	FBgn0035574	RhoGEF64C	Human	50650	683	ARHGEF3	3	2.89	high	Yes	Yes	eggNOG, RoundUp, TreeFam
292	FBgn0035574	Gef64C	FastLMM	0	1	0	0	0	0	0	FBGN0035574	RhoGEF64C	38578	FBgn0035574	RhoGEF64C	Human	10276	14592	NET1	3	2.89	high	Yes	Yes	eggNOG, RoundUp, TreeFam
293	FBgn0003255	rk	FastLMM	0	0	0	1	0	0	0	FBGN0003255	rk	34819	FBgn0003255	rk	Human	8549	4504	LGR5	9	8.97	high	Yes	Yes	eggNOG, Hieranoid, Homologene, Inparanoid, Isobase, OrthoDB, OrthoInspector, Panther, TreeFam
294	FBgn0010265	RpS13	FastLMM	0	0	0	0	0	0	1	FBGN0010265	RpS13	34149	FBgn0010265	RpS13	Human	6207	10386	RPS13	14	13.8	high	Yes	Yes	Compara, eggNOG, Hieranoid, Homologene, Inparanoid, OMA, OrthoDB, OrthoFinder, OrthoInspector, orthoMCL, Panther, Phylome, RoundUp, TreeFam
295	FBgn0034743	RpS16	FastLMM	0	0	0	0	0	0	1	FBGN0034743	RpS16	37580	FBgn0034743	RpS16	Human	6217	10396	RPS16	14	13.8	high	Yes	Yes	Compara, eggNOG, Hieranoid, Homologene, Inparanoid, OMA, OrthoDB, OrthoFinder, OrthoInspector, orthoMCL, Panther, Phylome, RoundUp, TreeFam
297	FBgn0003345	sd	FastLMM	0	0	0	1	0	0	0	FBGN0003345	sd	32536	FBgn0003345	sd	Human	7003	11714	TEAD1	13	12.7	high	Yes	Yes	Compara, eggNOG, Hieranoid, Homologene, Inparanoid, OMA, OrthoDB, OrthoFinder, OrthoInspector, orthoMCL, Phylome, RoundUp, TreeFam
298	FBgn0010415	Sdc	FastLMM	1	1	0	0	0	0	0	FBGN0010415	Sdc	37447	FBgn0010415	Sdc	Human	6385	10661	SDC4	6	5.94	high	Yes	Yes	Compara, OrthoDB, Panther, Phylome, RoundUp, TreeFam
298	FBgn0010415	Sdc	FastLMM	1	1	0	0	0	0	0	FBGN0010415	Sdc	37447	FBgn0010415	Sdc	Human	6382	10658	SDC1	6	5.9	high	Yes	Yes	Compara, OrthoFinder, OrthoInspector, Panther, Phylome, TreeFam
298	FBgn0010415	Sdc	FastLMM	1	1	0	0	0	0	0	FBGN0010415	Sdc	37447	FBgn0010415	Sdc	Human	6383	10659	SDC2	6	5.83	high	Yes	Yes	Compara, orthoMCL, Panther, Phylome, RoundUp, TreeFam
299	FBgn0011260	Sema-2a	FastLMM	0	0	0	0	0	1	0	FBGN0011260	Sema2a	36846	FBgn0011260	Sema2a	Human	10371	10723	SEMA3A	8	7.85	high	Yes	Yes	Compara, eggNOG, Hieranoid, Homologene, OMA, OrthoFinder, Panther, Phylome
300	FBgn0036544	sff	FastLMM	0	0	0	0	0	1	0	FBGN0036544	sff	39732	FBgn0036544	sff	Human	84446	18994	BRSK1	13	12.75	high	Yes	Yes	Compara, eggNOG, Inparanoid, Isobase, OMA, OrthoDB, OrthoFinder, OrthoInspector, orthoMCL, Panther, Phylome, RoundUp, TreeFam
301	FBgn0052423	shep	FastLMM	0	0	0	0	0	1	0	FBGN0052423	shep	38605	FBgn0052423	shep	Human	27303	13427	RBMS3	11	10.78	high	Yes	Yes	Compara, eggNOG, Hieranoid, Inparanoid, OrthoFinder, OrthoInspector, orthoMCL, Panther, Phylome, RoundUp, TreeFam
302	FBgn0261698	CG42732	FastLMM	1	0	0	0	0	0	0	FBGN0261698	SLO2	5740325	FBgn0261698	SLO2	Human	57582	18865	KCNT1	14	13.8	high	Yes	Yes	Compara, eggNOG, Hieranoid, Homologene, Inparanoid, OMA, OrthoDB, OrthoFinder, OrthoInspector, orthoMCL, Panther, Phylome, RoundUp, TreeFam
303	FBgn0085450	Snoo	FastLMM	0	1	1	0	0	0	0	FBGN0085450	Snoo	5740414	FBgn0085450	Snoo	Human	6497	10896	SKI	7	6.84	high	Yes	Yes	eggNOG, OrthoFinder, OrthoInspector, orthoMCL, Panther, Phylome, RoundUp
305	FBgn0003463	sog	FastLMM	0	0	1	0	0	0	0	FBGN0003463	sog	32498	FBgn0003463	sog	Human	8646	1949	CHRD	13	12.79	high	Yes	Yes	eggNOG, Hieranoid, Homologene, Inparanoid, Isobase, OMA, OrthoDB, OrthoFinder, OrthoInspector, orthoMCL, Panther, Phylome, TreeFam
308	FBgn0030774	spheroide	FastLMM	0	0	0	1	0	0	0	FBGN0030774	sphe	32648	FBgn0030774	sphe	Human	339501	29625	PRSS38	2	1.92	high	Yes	Yes	OrthoDB, Phylome
310	FBgn0265045	Strn-Mlck	FastLMM	0	0	0	0	1	0	0	FBGN0265045	Strn-Mlck	36753	FBgn0265045	Strn-Mlck	Human	4638	7590	MYLK	4	3.89	high	Yes	Yes	eggNOG, OrthoFinder, RoundUp, TreeFam
312	FBgn0261090	Sytbeta	FastLMM	0	0	1	0	0	0	0	FBGN0261090	Sytbeta	39630	FBgn0261090	Sytbeta	Human	84258	11511	SYT3	5	4.97	high	Yes	Yes	eggNOG, OrthoDB, OrthoFinder, Panther, TreeFam
312	FBgn0261090	Sytbeta	FastLMM	0	0	1	0	0	0	0	FBGN0261090	Sytbeta	39630	FBgn0261090	Sytbeta	Human	341359	19266	SYT10	5	4.97	high	Yes	Yes	eggNOG, OrthoDB, OrthoFinder, Panther, TreeFam
312	FBgn0261090	Sytbeta	FastLMM	0	0	1	0	0	0	0	FBGN0261090	Sytbeta	39630	FBgn0261090	Sytbeta	Human	143425	19265	SYT9	5	4.97	high	Yes	Yes	eggNOG, OrthoDB, OrthoFinder, Panther, TreeFam
314	FBgn0034939	thoc5	FastLMM	0	0	0	0	0	0	1	FBGN0034939	thoc5	37810	FBgn0034939	thoc5	Human	8563	19074	THOC5	14	13.8	high	Yes	Yes	Compara, eggNOG, Hieranoid, Homologene, Inparanoid, OMA, OrthoDB, OrthoFinder, OrthoInspector, orthoMCL, Panther, Phylome, RoundUp, TreeFam
316	FBgn0026160	tna	FastLMM	0	1	0	1	0	1	1	FBGN0026160	tna	39217	FBgn0026160	tna	Human	83637	22229	ZMIZ2	13	12.74	high	Yes	Yes	Compara, eggNOG, Hieranoid, Inparanoid, Isobase, OrthoDB, OrthoFinder, OrthoInspector, orthoMCL, Panther, Phylome, RoundUp, TreeFam
317	FBgn0004924	Top1	FastLMM	0	1	0	0	1	0	0	FBGN0004924	Top1	32458	FBgn0004924	Top1	Human	7150	11986	TOP1	13	12.87	high	Yes	Yes	eggNOG, Hieranoid, Homologene, Inparanoid, OMA, OrthoDB, OrthoFinder, OrthoInspector, orthoMCL, Panther, Phylome, RoundUp, TreeFam
318	FBgn0032586	Tpr2	FastLMM	0	1	0	0	0	0	0	FBGN0032586	Tpr2	34984	FBgn0032586	Tpr2	Human	7266	12392	DNAJC7	13	12.87	high	Yes	Yes	eggNOG, Hieranoid, Homologene, Inparanoid, OMA, OrthoDB, OrthoFinder, OrthoInspector, orthoMCL, Panther, Phylome, RoundUp, TreeFam
319	FBgn0262139	trh	FastLMM	0	0	0	0	1	0	0	FBGN0262139	trh	38065	FBgn0262139	trh	Human	4861	7894	NPAS1	9	8.78	high	Yes	Yes	Compara, eggNOG, Inparanoid, OrthoInspector, orthoMCL, Panther, Phylome, RoundUp, TreeFam
319	FBgn0262139	trh	FastLMM	0	0	0	0	1	0	0	FBGN0262139	trh	38065	FBgn0262139	trh	Human	64067	19311	NPAS3	9	8.73	high	Yes	Yes	Compara, eggNOG, OrthoFinder, OrthoInspector, orthoMCL, Panther, Phylome, RoundUp, TreeFam
321	FBgn0035934	TrpA1	FastLMM	0	0	0	0	0	0	1	FBGN0035934	TrpA1	39015	FBgn0035934	TrpA1	Human	8989	497	TRPA1	14	13.72	high	Yes	Yes	Compara, eggNOG, Hieranoid, Homologene, Inparanoid, Isobase, OMA, OrthoDB, OrthoFinder, OrthoInspector, orthoMCL, Panther, Phylome, TreeFam
322	FBgn0033528	trsn	FastLMM	1	0	0	0	0	0	0	FBGN0033528	trsn	36110	FBgn0033528	trsn	Human	7247	12379	TSN	14	13.8	high	Yes	Yes	Compara, eggNOG, Hieranoid, Homologene, Inparanoid, OMA, OrthoDB, OrthoFinder, OrthoInspector, orthoMCL, Panther, Phylome, RoundUp, TreeFam
323	FBgn0038541	TyrRII	FastLMM	0	0	0	1	0	0	0	FBGN0038541	TyrRII	42135	FBgn0038541	TyrRII	Human	146	280	ADRA1D	2	2.15	high	Yes	Yes	Inparanoid, Panther
325	FBgn0028476	CG15817	FastLMM	1	0	0	0	0	0	0	FBGN0028476	Usp1	43462	FBgn0028476	Usp1	Human	7398	12607	USP1	8	7.98	high	Yes	Yes	eggNOG, Hieranoid, Inparanoid, OMA, OrthoDB, OrthoInspector, Panther, Phylome
326	FBgn0040068	vav	FastLMM	0	0	0	1	0	0	0	FBGN0040068	Vav	32920	FBgn0040068	Vav	Human	7409	12657	VAV1	14	13.74	high	Yes	Yes	Compara, eggNOG, Hieranoid, Homologene, Inparanoid, Isobase, OMA, OrthoFinder, OrthoInspector, orthoMCL, Panther, Phylome, RoundUp, TreeFam
327	FBgn0285911	Vps16A	FastLMM	0	0	1	0	0	0	0	FBGN0285911	Vps16A	41107	FBgn0285911	Vps16A	Human	64601	14584	VPS16	14	13.8	high	Yes	Yes	Compara, eggNOG, Hieranoid, Homologene, Inparanoid, OMA, OrthoDB, OrthoFinder, OrthoInspector, orthoMCL, Panther, Phylome, RoundUp, TreeFam
328	FBgn0034744	Vps20	FastLMM	0	0	0	0	0	0	1	FBGN0034744	Vps20	37581	FBgn0034744	Vps20	Human	79643	25675	CHMP6	13	12.79	high	Yes	Yes	Compara, eggNOG, Hieranoid, Homologene, Inparanoid, OMA, OrthoFinder, OrthoInspector, orthoMCL, Panther, Phylome, RoundUp, TreeFam
329	FBgn0035251	CG7967	FastLMM	0	0	0	0	0	1	0	FBGN0035251	Vta1	38204	FBgn0035251	Vta1	Human	51534	20954	VTA1	14	13.8	high	Yes	Yes	Compara, eggNOG, Hieranoid, Homologene, Inparanoid, OMA, OrthoDB, OrthoFinder, OrthoInspector, orthoMCL, Panther, Phylome, RoundUp, TreeFam
330	FBgn0261862	whd	FastLMM	1	0	0	0	0	0	0	FBGN0261862	whd	36109	FBgn0261862	whd	Human	1374	2328	CPT1A	13	12.8	high	Yes	Yes	Compara, eggNOG, Hieranoid, Inparanoid, OMA, OrthoDB, OrthoFinder, OrthoInspector, orthoMCL, Panther, Phylome, RoundUp, TreeFam
331	FBgn0026751	XRCC1	FastLMM	0	1	0	0	0	0	0	FBGN0026751	XRCC1	31451	FBgn0026751	XRCC1	Human	7515	12828	XRCC1	11	10.75	high	Yes	Yes	Compara, eggNOG, OMA, OrthoDB, OrthoFinder, OrthoInspector, orthoMCL, Panther, Phylome, RoundUp, TreeFam
333	FBgn0039747	AdoR	FastEpistasis	0	0	0	0	1	0	0	FBGN0039747	AdoR	43583	FBgn0039747	AdoR	Human	136	264	ADORA2B	8	7.83	high	Yes	Yes	Compara, eggNOG, OrthoFinder, OrthoInspector, Panther, Phylome, RoundUp, TreeFam
334	FBgn0033983	CG10253	FastEpistasis	0	1	0	0	0	0	0	FBGN0033983	ADPS	36669	FBgn0033983	ADPS	Human	8540	327	AGPS	14	13.8	high	Yes	Yes	Compara, eggNOG, Hieranoid, Homologene, Inparanoid, OMA, OrthoDB, OrthoFinder, OrthoInspector, orthoMCL, Panther, Phylome, RoundUp, TreeFam
335	FBgn0250816	AGO3	FastEpistasis	0	0	0	0	0	0	1	FBGN0250816	AGO3	3355150	FBgn0250816	AGO3	Human	55124	17644	PIWIL2	10	9.73	high	Yes	Yes	Compara, eggNOG, Homologene, OrthoFinder, OrthoInspector, orthoMCL, Panther, Phylome, RoundUp, TreeFam
337	FBgn0038893	CG6353	FastEpistasis	0	0	1	0	0	0	0	FBGN0038893	Archease	42551	FBgn0038893	Archease	Human	339487	24094	ZBTB8OS	14	13.8	high	Yes	Yes	Compara, eggNOG, Hieranoid, Homologene, Inparanoid, OMA, OrthoDB, OrthoFinder, OrthoInspector, orthoMCL, Panther, Phylome, RoundUp, TreeFam
338	FBgn0034366	Atg7	FastEpistasis	0	0	1	0	0	0	0	FBGN0034366	Atg7	37141	FBgn0034366	Atg7	Human	10533	16935	ATG7	14	13.8	high	Yes	Yes	Compara, eggNOG, Hieranoid, Homologene, Inparanoid, OMA, OrthoDB, OrthoFinder, OrthoInspector, orthoMCL, Panther, Phylome, RoundUp, TreeFam
339	FBgn0035032	CG4692	FastEpistasis	0	1	0	0	0	0	0	FBGN0035032	ATPsynF	37931	FBgn0035032	ATPsynF	Human	9551	848	ATP5MF	12	11.79	high	Yes	Yes	Compara, eggNOG, Hieranoid, Inparanoid, OMA, OrthoFinder, OrthoInspector, orthoMCL, Panther, Phylome, RoundUp, TreeFam
341	FBgn0261683	CG42730	FastEpistasis	0	0	0	0	0	1	0	FBGN0261683	B9d2	10178891	FBgn0261683	B9d2	Human	80776	28636	B9D2	9	8.9	high	Yes	Yes	Compara, eggNOG, Hieranoid, Homologene, OMA, OrthoFinder, OrthoInspector, Panther, TreeFam
342	FBgn0011300	babo	FastEpistasis	0	0	0	0	0	1	0	FBGN0011300	babo	35900	FBgn0011300	babo	Human	7046	11772	TGFBR1	14	13.82	high	Yes	Yes	eggNOG, Hieranoid, Homologene, Inparanoid, Isobase, OMA, OrthoDB, OrthoFinder, OrthoInspector, orthoMCL, Panther, Phylome, RoundUp, TreeFam
344	FBgn0014135	bnl	FastEpistasis	0	1	1	0	0	0	0	FBGN0014135	bnl	42356	FBgn0014135	bnl	Human	26281	3677	FGF20	7	6.91	high	Yes	Yes	Compara, eggNOG, Isobase, OrthoFinder, OrthoInspector, Panther, RoundUp
345	FBgn0265598	CG15048	FastEpistasis	0	0	0	1	0	0	0	FBGN0265598	Bx	32846	FBgn0265598	Bx	Human	4004	6641	LMO1	8	7.8	high	Yes	Yes	eggNOG, OrthoFinder, OrthoInspector, orthoMCL, Panther, Phylome, RoundUp, TreeFam
346	FBgn0031367	c-cup	FastEpistasis	0	0	1	0	0	0	0	FBGN0031367	c-cup	33360	FBgn0031367	c-cup	Human	29937	30384	NENF	4	3.91	high	Yes	Yes	eggNOG, Isobase, Panther, TreeFam
347	FBgn0034554	CG15227	FastEpistasis	0	1	0	0	0	0	0	FBGN0034554	CG15227	37359	FBgn0034554	CAH14	Human	767	1382	CA8	3	2.93	high	Yes	Yes	Compara, eggNOG, Panther
348	FBgn0013995	Calx	FastEpistasis	0	1	0	0	0	0	0	FBGN0013995	Calx	42481	FBgn0013995	Calx	Human	6547	11070	SLC8A3	13	12.87	high	Yes	Yes	eggNOG, Hieranoid, Homologene, Inparanoid, OMA, OrthoDB, OrthoFinder, OrthoInspector, orthoMCL, Panther, Phylome, RoundUp, TreeFam
348	FBgn0013995	Calx	FastEpistasis	0	1	0	0	0	0	0	FBGN0013995	Calx	42481	FBgn0013995	Calx	Human	6546	11068	SLC8A1	13	12.82	high	Yes	Yes	eggNOG, Hieranoid, Inparanoid, Isobase, OMA, OrthoDB, OrthoFinder, OrthoInspector, orthoMCL, Panther, Phylome, RoundUp, TreeFam
350	FBgn0028509	cenG1A	FastEpistasis	0	0	1	0	0	0	0	FBGN0028509	CenG1A	34803	FBgn0028509	CenG1A	Human	116987	16922	AGAP1	13	12.81	high	Yes	Yes	eggNOG, Hieranoid, Homologene, Inparanoid, Isobase, OMA, OrthoFinder, OrthoInspector, orthoMCL, Panther, Phylome, RoundUp, TreeFam
353	FBgn0034420	CG10737	FastEpistasis	0	1	0	0	0	0	0	FBGN0034420	CG10737	37202	FBgn0034420	CG10737	Human	25966	1266	C2CD2	6	5.87	high	Yes	Yes	Compara, eggNOG, OrthoFinder, Panther, Phylome, RoundUp
354	FBgn0034626	CG10795	FastEpistasis	0	0	0	0	0	0	1	FBGN0034626	CG10795	37443	FBgn0034626	CG10795	Human	83941	24142	TM2D1	13	12.73	high	Yes	Yes	Compara, eggNOG, Hieranoid, Homologene, Inparanoid, Isobase, OrthoFinder, OrthoInspector, orthoMCL, Panther, Phylome, RoundUp, TreeFam
356	FBgn0031835	CG11319	FastEpistasis	1	0	0	0	0	0	0	FBGN0031835	CG11319	33923	FBgn0031835	CG11319	Human	57628	20823	DPP10	9	8.88	high	Yes	Yes	eggNOG, Hieranoid, Homologene, Inparanoid, Isobase, OrthoDB, Panther, Phylome, TreeFam
359	FBgn0033579	CG13229	FastEpistasis	0	1	0	0	0	0	0	FBGN0033579	CG13229	36168	FBgn0033579	CG13229	Human	124274	19995	GPR139	3	2.97	high	Yes	Yes	Inparanoid, OrthoDB, Phylome
367	FBgn0038660	CG14291	FastEpistasis	0	0	0	0	1	0	0	FBGN0038660	CG14291	42266	FBgn0038660	CG14291	Human	6448	10818	SGSH	14	13.8	high	Yes	Yes	Compara, eggNOG, Hieranoid, Homologene, Inparanoid, OMA, OrthoDB, OrthoFinder, OrthoInspector, orthoMCL, Panther, Phylome, RoundUp, TreeFam
379	FBgn0033226	CG1882	FastEpistasis	1	0	0	0	0	0	0	FBGN0033226	CG1882	35733	FBgn0033226	CG1882	Human	63874	20154	ABHD4	15	14.75	high	Yes	Yes	Compara, eggNOG, Hieranoid, Homologene, Inparanoid, Isobase, OMA, OrthoDB, OrthoFinder, OrthoInspector, orthoMCL, Panther, Phylome, RoundUp, TreeFam
381	FBgn0050047	CG30047	FastEpistasis	0	0	1	0	0	0	0	FBGN0050047	CG30047	246414	FBgn0050047	CG30047	Human	79956	23703	ERMP1	14	13.74	high	Yes	Yes	Compara, eggNOG, Hieranoid, Homologene, Inparanoid, Isobase, OrthoDB, OrthoFinder, OrthoInspector, orthoMCL, Panther, Phylome, RoundUp, TreeFam
382	FBgn0051121	CG31121	FastEpistasis	0	0	1	0	0	0	0	FBGN0051121	CG31121	42975	FBgn0051121	CG31121	Human	64241	13887	ABCG8	4	3.94	high	Yes	Yes	Compara, eggNOG, OrthoDB, Panther
385	FBgn0052066	CG32066	FastEpistasis	1	0	0	0	0	0	0	FBGN0052066	CG32066	39206	FBgn0052066	CG32066	Human	81553	25373	FAM49A	12	11.9	high	Yes	Yes	Compara, eggNOG, Hieranoid, Inparanoid, OMA, OrthoDB, OrthoFinder, OrthoInspector, Panther, Phylome, RoundUp, TreeFam
385	FBgn0052066	CG32066	FastEpistasis	1	0	0	0	0	0	0	FBGN0052066	CG32066	39206	FBgn0052066	CG32066	Human	51571	25216	FAM49B	12	11.87	high	Yes	Yes	eggNOG, Hieranoid, Inparanoid, OMA, OrthoDB, OrthoFinder, OrthoInspector, orthoMCL, Panther, Phylome, RoundUp, TreeFam
386	FBgn0052333	CG32333	FastEpistasis	0	0	1	0	0	0	0	FBGN0052333	CG32333	38142	FBgn0052333	CG32333	Human	57579	21084	FAM135A	13	12.8	high	Yes	Yes	Compara, eggNOG, Hieranoid, Inparanoid, OMA, OrthoDB, OrthoFinder, OrthoInspector, orthoMCL, Panther, Phylome, RoundUp, TreeFam
386	FBgn0052333	CG32333	FastEpistasis	0	0	1	0	0	0	0	FBGN0052333	CG32333	38142	FBgn0052333	CG32333	Human	51059	28029	FAM135B	13	12.8	high	Yes	Yes	Compara, eggNOG, Hieranoid, Inparanoid, OMA, OrthoDB, OrthoFinder, OrthoInspector, orthoMCL, Panther, Phylome, RoundUp, TreeFam
387	FBgn0052369	CG32369	FastEpistasis	0	1	0	0	0	0	0	FBGN0052369	CG32369	38873	FBgn0052369	CG32369	Human	79836	21152	LONRF3	12	11.84	high	Yes	Yes	Compara, eggNOG, Hieranoid, Inparanoid, Isobase, OrthoDB, OrthoFinder, OrthoInspector, Panther, Phylome, RoundUp, TreeFam
387	FBgn0052369	CG32369	FastEpistasis	0	1	0	0	0	0	0	FBGN0052369	CG32369	38873	FBgn0052369	CG32369	Human	164832	24788	LONRF2	12	11.79	high	Yes	Yes	Compara, eggNOG, Hieranoid, Inparanoid, OrthoDB, OrthoFinder, OrthoInspector, orthoMCL, Panther, Phylome, RoundUp, TreeFam
389	FBgn0052683	CG32683	FastEpistasis	0	0	0	0	0	1	0	FBGN0052683	CG32683	31970	FBgn0052683	CG32683	Human	6295	10521	SAG	5	4.85	high	Yes	Yes	Compara, eggNOG, OrthoDB, Panther, Phylome
390	FBgn0023531	CG32809	FastEpistasis	0	0	0	0	1	0	0	FBGN0023531	CG32809	31121	FBgn0023531	CG32809	Human	56243	25428	KIAA1217	9	8.88	high	Yes	Yes	Compara, Inparanoid, OrthoFinder, OrthoInspector, orthoMCL, Panther, Phylome, RoundUp, TreeFam
390	FBgn0023531	CG32809	FastEpistasis	0	0	0	0	1	0	0	FBGN0023531	CG32809	31121	FBgn0023531	CG32809	Human	80725	29506	SRCIN1	9	8.8	high	Yes	Yes	Compara, Inparanoid, Isobase, OrthoFinder, OrthoInspector, orthoMCL, Panther, Phylome, TreeFam
397	FBgn0036838	CG3808	FastEpistasis	1	0	0	0	0	0	0	FBGN0036838	CG3808	40074	FBgn0036838	CG3808	Human	27037	24974	TRMT2A	14	13.84	high	Yes	Yes	Compara, eggNOG, Hieranoid, Homologene, Inparanoid, Isobase, OMA, OrthoDB, OrthoFinder, OrthoInspector, orthoMCL, Panther, RoundUp, TreeFam
398	FBgn0259935	CG42458	FastEpistasis	0	1	0	0	0	0	0	FBGN0259935	CG42458	2768945	FBgn0259935	CG42458	Human	3183	5035	HNRNPC	6	5.99	high	Yes	Yes	eggNOG, OrthoFinder, OrthoInspector, Panther, RoundUp, TreeFam
399	FBgn0261545	CG42663	FastEpistasis	0	0	0	1	1	0	1	FBGN0261545	CG42663	36403	FBgn0261545	CG42663	Human	344148	29847	NCKAP5	4	3.86	high	Yes	Yes	Compara, eggNOG, OrthoInspector, RoundUp
400	FBgn0261555	CG42673	FastEpistasis	0	0	0	1	0	0	0	FBGN0261555	CG42673	39111	FBgn0261555	CG42673	Human	9722	16859	NOS1AP	10	9.96	high	Yes	Yes	eggNOG, Hieranoid, Inparanoid, OMA, OrthoFinder, OrthoInspector, Panther, Phylome, RoundUp, TreeFam
405	FBgn0028481	CG4341	FastEpistasis	0	0	0	0	1	0	0	FBGN0028481	CG4341	33276	FBgn0028481	CG4341	Human	160335	25440	TMTC2	14	13.82	high	Yes	Yes	eggNOG, Hieranoid, Homologene, Inparanoid, Isobase, OMA, OrthoDB, OrthoFinder, OrthoInspector, orthoMCL, Panther, Phylome, RoundUp, TreeFam
406	FBgn0263706	CG43658	FastEpistasis	0	1	0	0	0	0	0	FBGN0263706	CG43658	32729	FBgn0263706	CG43658	Human	55160	25540	ARHGEF10L	10	9.83	high	Yes	Yes	Compara, eggNOG, Inparanoid, OrthoDB, OrthoFinder, OrthoInspector, orthoMCL, Panther, Phylome, RoundUp
406	FBgn0263706	CG43658	FastEpistasis	0	1	0	0	0	0	0	FBGN0263706	CG43658	32729	FBgn0263706	CG43658	Human	9639	14103	ARHGEF10	10	9.83	high	Yes	Yes	Compara, eggNOG, Inparanoid, OrthoDB, OrthoFinder, OrthoInspector, orthoMCL, Panther, Phylome, RoundUp
409	FBgn0038750	CG4465	FastEpistasis	1	0	0	0	0	0	0	FBGN0038750	CG4465	42374	FBgn0038750	CG4465	Human	6580	10963	SLC22A1	5	4.94	high	Yes	Yes	Compara, eggNOG, OrthoDB, OrthoFinder, Panther
412	FBgn0027556	CG4928	FastEpistasis	0	0	0	1	0	0	0	FBGN0027556	CG4928	32682	FBgn0027556	CG4928	Human	54346	12570	UNC93A	15	14.75	high	Yes	Yes	Compara, eggNOG, Hieranoid, Homologene, Inparanoid, Isobase, OMA, OrthoDB, OrthoFinder, OrthoInspector, orthoMCL, Panther, Phylome, RoundUp, TreeFam
414	FBgn0028744	CG5033	FastEpistasis	0	0	0	0	0	1	0	FBGN0028744	CG5033	37036	FBgn0028744	CG5033	Human	23246	15519	BOP1	13	12.87	high	Yes	Yes	eggNOG, Hieranoid, Homologene, Inparanoid, OMA, OrthoDB, OrthoFinder, OrthoInspector, orthoMCL, Panther, Phylome, RoundUp, TreeFam
415	FBgn0038868	CG5862	FastEpistasis	0	0	1	0	0	0	0	FBGN0038868	CG5862	42516	FBgn0038868	CG5862	Human	65992	16110	DDRGK1	11	10.78	high	Yes	Yes	Compara, eggNOG, Hieranoid, Inparanoid, OrthoFinder, OrthoInspector, orthoMCL, Panther, Phylome, RoundUp, TreeFam
416	FBgn0037807	CG6293	FastEpistasis	0	1	0	0	0	0	0	FBGN0037807	CG6293	41259	FBgn0037807	CG6293	Human	9962	10973	SLC23A2	14	13.75	high	Yes	Yes	Compara, eggNOG, Hieranoid, Inparanoid, Isobase, OMA, OrthoDB, OrthoFinder, OrthoInspector, orthoMCL, Panther, Phylome, RoundUp, TreeFam
422	FBgn0053696	CG33696	FastEpistasis	0	0	0	0	0	0	1	FBGN0053696	CNMaR	39127	FBgn0053696	CNMaR	Human	350383	20088	GPR142	2	1.94	high	Yes	Yes	Compara, OrthoDB
425	FBgn0004198	ct	FastEpistasis	0	0	1	0	0	0	0	FBGN0004198	ct	44540	FBgn0004198	ct	Human	23316	19347	CUX2	11	10.83	high	Yes	Yes	Compara, eggNOG, Hieranoid, Inparanoid, OrthoDB, OrthoFinder, OrthoInspector, orthoMCL, Panther, Phylome, RoundUp
426	FBgn0039637	CG11880	FastEpistasis	0	1	0	0	0	0	0	FBGN0039637	Ctl2	43440	FBgn0039637	Ctl2	Human	80736	13941	SLC44A4	13	12.87	high	Yes	Yes	eggNOG, Hieranoid, Homologene, Inparanoid, OMA, OrthoDB, OrthoFinder, OrthoInspector, orthoMCL, Panther, Phylome, RoundUp, TreeFam
426	FBgn0039637	CG11880	FastEpistasis	0	1	0	0	0	0	0	FBGN0039637	Ctl2	43440	FBgn0039637	Ctl2	Human	57153	17292	SLC44A2	13	12.82	high	Yes	Yes	eggNOG, Hieranoid, Inparanoid, Isobase, OMA, OrthoDB, OrthoFinder, OrthoInspector, orthoMCL, Panther, Phylome, RoundUp, TreeFam
427	FBgn0032210	CYLD	FastEpistasis	0	0	0	0	0	0	1	FBGN0032210	CYLD	34380	FBgn0032210	CYLD	Human	1540	2584	CYLD	13	12.79	high	Yes	Yes	Compara, eggNOG, Hieranoid, Homologene, Inparanoid, OrthoDB, OrthoFinder, OrthoInspector, orthoMCL, Panther, Phylome, RoundUp, TreeFam
428	FBgn0028382	cyp33	FastEpistasis	0	0	0	0	0	0	1	FBGN0028382	cyp33	36984	FBgn0028382	cyp33	Human	10450	9258	PPIE	11	10.74	high	Yes	Yes	eggNOG, Hieranoid, Homologene, Inparanoid, OMA, OrthoDB, OrthoFinder, OrthoInspector, orthoMCL, Phylome, TreeFam
430	FBgn0031461	daw	FastEpistasis	0	1	0	0	0	0	0	FBGN0031461	daw	33474	FBgn0031461	daw	Human	7040	11766	TGFB1	4	3.97	high	Yes	Yes	eggNOG, OMA, Panther, TreeFam
432	FBgn0013810	Dhc36C	FastEpistasis	0	0	1	0	0	0	0	FBGN0013810	Dhc36C	35061	FBgn0013810	Dhc36C	Human	56171	18661	DNAH7	13	12.8	high	Yes	Yes	Compara, eggNOG, Homologene, Inparanoid, OMA, OrthoDB, OrthoFinder, OrthoInspector, orthoMCL, Panther, Phylome, RoundUp, TreeFam
433	FBgn0011582	DopR	FastEpistasis	0	0	0	0	0	0	1	FBGN0011582	Dop1R1	41726	FBgn0011582	Dop1R1	Human	1816	3026	DRD5	9	8.86	high	Yes	Yes	eggNOG, Hieranoid, Inparanoid, OMA, OrthoDB, OrthoInspector, orthoMCL, RoundUp, TreeFam
438	FBgn0020307	dve	FastEpistasis	0	0	0	0	1	0	0	FBGN0020307	dve	37546	FBgn0020307	dve	Human	6304	10541	SATB1	7	6.91	high	Yes	Yes	Compara, eggNOG, Isobase, OrthoFinder, OrthoInspector, Panther, RoundUp
439	FBgn0039411	dys	FastEpistasis	0	1	0	0	0	0	0	FBGN0039411	dysf	43174	FBgn0039411	dysf	Human	266743	18983	NPAS4	8	7.94	high	Yes	Yes	Compara, eggNOG, Hieranoid, Inparanoid, OrthoFinder, OrthoInspector, Panther, TreeFam
441	FBgn0003731	Egfr	FastEpistasis	0	0	0	0	0	1	0	FBGN0003731	Egfr	37455	FBgn0003731	Egfr	Human	1956	3236	EGFR	11	10.87	high	Yes	Yes	eggNOG, Inparanoid, OMA, OrthoDB, OrthoFinder, OrthoInspector, orthoMCL, Panther, Phylome, RoundUp, TreeFam
442	FBgn0026250	eIF-1A	FastEpistasis	0	0	0	0	0	0	1	FBGN0026250	eIF1A	44260	FBgn0026250	eIF1A	Human	9086	3252	EIF1AY	13	12.9	high	Yes	Yes	Compara, Hieranoid, Homologene, Inparanoid, OMA, OrthoDB, OrthoFinder, OrthoInspector, orthoMCL, Panther, Phylome, RoundUp, TreeFam
443	FBgn0053100	4EHP	FastEpistasis	0	0	0	1	0	0	0	FBGN0053100	eIF4EHP	326255	FBgn0053100	eIF4EHP	Human	9470	3293	EIF4E2	13	12.8	high	Yes	Yes	Compara, eggNOG, Hieranoid, Inparanoid, OMA, OrthoDB, OrthoFinder, OrthoInspector, orthoMCL, Panther, Phylome, RoundUp, TreeFam
444	FBgn0011589	elk	FastEpistasis	0	0	0	0	0	1	0	FBGN0011589	Elk	37047	FBgn0011589	Elk	Human	131096	18864	KCNH8	12	11.83	high	Yes	Yes	Compara, eggNOG, Hieranoid, Inparanoid, Isobase, OrthoDB, OrthoFinder, OrthoInspector, orthoMCL, Panther, RoundUp, TreeFam
445	FBgn0037534	CG2781	FastEpistasis	0	0	0	0	0	1	0	FBGN0037534	CG2781	40943	FBgn0037534	ELOVL	Human	79993	26292	ELOVL7	15	14.75	high	Yes	Yes	Compara, eggNOG, Hieranoid, Homologene, Inparanoid, Isobase, OMA, OrthoDB, OrthoFinder, OrthoInspector, orthoMCL, Panther, Phylome, RoundUp, TreeFam
446	FBgn0264078	Flo-2	FastEpistasis	1	0	0	0	0	0	0	FBGN0264078	Flo2	32425	FBgn0264078	Flo2	Human	2319	3758	FLOT2	14	13.8	high	Yes	Yes	Compara, eggNOG, Hieranoid, Homologene, Inparanoid, OMA, OrthoDB, OrthoFinder, OrthoInspector, orthoMCL, Panther, Phylome, RoundUp, TreeFam
447	FBgn0086675	fne	FastEpistasis	0	0	0	0	0	0	1	FBGN0086675	fne	32245	FBgn0086675	fne	Human	1993	3313	ELAVL2	14	13.8	high	Yes	Yes	Compara, eggNOG, Hieranoid, Homologene, Inparanoid, OMA, OrthoDB, OrthoFinder, OrthoInspector, orthoMCL, Panther, Phylome, RoundUp, TreeFam
448	FBgn0004516	Gad1	FastEpistasis	0	0	0	0	1	0	0	FBGN0004516	Gad1	38484	FBgn0004516	Gad1	Human	2571	4092	GAD1	14	13.8	high	Yes	Yes	Compara, eggNOG, Hieranoid, Homologene, Inparanoid, OMA, OrthoDB, OrthoFinder, OrthoInspector, orthoMCL, Panther, Phylome, RoundUp, TreeFam
449	FBgn0036862	Gbs-76A	FastEpistasis	0	0	0	1	0	0	0	FBGN0036862	Gbs-76A	40102	FBgn0036862	Gbs-76A	Human	5506	9291	PPP1R3A	6	5.92	high	Yes	Yes	eggNOG, Isobase, OrthoDB, OrthoInspector, Panther, TreeFam
449	FBgn0036862	Gbs-76A	FastEpistasis	0	0	0	1	0	0	0	FBGN0036862	Gbs-76A	40102	FBgn0036862	Gbs-76A	Human	5509	9294	PPP1R3D	6	5.8	high	Yes	Yes	eggNOG, Homologene, OrthoFinder, Phylome, RoundUp, TreeFam
450	FBgn0042135	CG18812	FastEpistasis	0	0	0	0	1	0	0	FBGN0042135	CG18812	59173	FBgn0042135	Gdap2	Human	54834	18010	GDAP2	14	13.8	high	Yes	Yes	Compara, eggNOG, Hieranoid, Homologene, Inparanoid, OMA, OrthoDB, OrthoFinder, OrthoInspector, orthoMCL, Panther, Phylome, RoundUp, TreeFam
451	FBgn0262869	mun	FastEpistasis	0	0	0	0	1	0	0	FBGN0262869	Gfrl	3346162	FBgn0262869	Gfrl	Human	389400	32789	GFRAL	6	5.97	high	Yes	Yes	Compara, OrthoFinder, OrthoInspector, Panther, Phylome, RoundUp
453	FBgn0259211	grh	FastEpistasis	0	1	0	0	0	0	0	FBGN0259211	grh	37038	FBgn0259211	grh	Human	29841	17923	GRHL1	8	7.84	high	Yes	Yes	eggNOG, Hieranoid, OrthoFinder, OrthoInspector, orthoMCL, Panther, Phylome, RoundUp
454	FBgn0029830	Grip	FastEpistasis	0	0	0	1	0	0	0	FBGN0029830	Grip	50391	FBgn0029830	Grip	Human	23426	18708	GRIP1	9	8.74	high	Yes	Yes	eggNOG, Inparanoid, OMA, OrthoDB, OrthoFinder, OrthoInspector, orthoMCL, Phylome, TreeFam
455	FBgn0033817	GstE14	FastEpistasis	0	0	0	0	0	1	0	FBGN0033817	GstE14	36467	FBgn0033817	GstE14	Human	100652871	NA	LOC100652871	2	2.01	high	Yes	Yes	OrthoDB, OrthoFinder
456	FBgn0010113	hdc	FastEpistasis	0	0	0	1	0	0	0	FBGN0010113	hdc	43604	FBgn0010113	hdc	Human	51696	21041	HECA	12	11.79	high	Yes	Yes	Compara, eggNOG, Hieranoid, Inparanoid, OMA, OrthoFinder, OrthoInspector, orthoMCL, Panther, Phylome, RoundUp, TreeFam
457	FBgn0011224	heph	FastEpistasis	0	0	0	0	1	0	0	FBGN0011224	heph	48571	FBgn0011224	heph	Human	5725	9583	PTBP1	13	12.81	high	Yes	Yes	eggNOG, Hieranoid, Homologene, Inparanoid, Isobase, OrthoDB, OrthoFinder, OrthoInspector, orthoMCL, Panther, Phylome, RoundUp, TreeFam
457	FBgn0011224	heph	FastEpistasis	0	0	0	0	1	0	0	FBGN0011224	heph	48571	FBgn0011224	heph	Human	58155	17662	PTBP2	13	12.8	high	Yes	Yes	Compara, eggNOG, Hieranoid, Inparanoid, OMA, OrthoDB, OrthoFinder, OrthoInspector, orthoMCL, Panther, Phylome, RoundUp, TreeFam
457	FBgn0011224	heph	FastEpistasis	0	0	0	0	1	0	0	FBGN0011224	heph	48571	FBgn0011224	heph	Human	9991	10253	PTBP3	13	12.8	high	Yes	Yes	Compara, eggNOG, Hieranoid, Inparanoid, OMA, OrthoDB, OrthoFinder, OrthoInspector, orthoMCL, Panther, Phylome, RoundUp, TreeFam
459	FBgn0011276	HLH3B	FastEpistasis	0	1	0	0	0	0	0	FBGN0011276	HLH3B	31249	FBgn0011276	HLH3B	Human	6887	11557	TAL2	7	6.9	high	Yes	Yes	eggNOG, OrthoFinder, OrthoInspector, Panther, Phylome, RoundUp, TreeFam
460	FBgn0004914	Hnf4	FastEpistasis	1	0	0	0	0	0	0	FBGN0004914	Hnf4	44544	FBgn0004914	Hnf4	Human	3174	5026	HNF4G	11	10.8	high	Yes	Yes	eggNOG, Hieranoid, Inparanoid, Isobase, OrthoFinder, OrthoInspector, orthoMCL, Panther, Phylome, RoundUp, TreeFam
461	FBgn0267791	bl	FastEpistasis	1	0	0	0	0	0	0	FBGN0267791	HnRNP-K	43862	FBgn0267791	HnRNP-K	Human	3190	5044	HNRNPK	11	10.9	high	Yes	Yes	eggNOG, Hieranoid, Inparanoid, Isobase, OrthoDB, OrthoFinder, OrthoInspector, orthoMCL, Panther, RoundUp, TreeFam
462	FBgn0264562	Hr4	FastEpistasis	1	0	0	0	0	0	0	FBGN0264562	Hr4	31162	FBgn0264562	Hr4	Human	2649	7985	NR6A1	8	7.78	high	Yes	Yes	Compara, eggNOG, Isobase, OrthoDB, orthoMCL, Panther, RoundUp, TreeFam
463	FBgn0038755	Hs6st	FastEpistasis	0	0	0	0	0	0	1	FBGN0038755	Hs6st	42380	FBgn0038755	Hs6st	Human	9394	5201	HS6ST1	14	13.8	high	Yes	Yes	Compara, eggNOG, Hieranoid, Homologene, Inparanoid, OMA, OrthoDB, OrthoFinder, OrthoInspector, orthoMCL, Panther, Phylome, RoundUp, TreeFam
465	FBgn0031294	IA-2	FastEpistasis	0	0	1	0	0	0	0	FBGN0031294	IA-2	33277	FBgn0031294	IA-2	Human	5798	9676	PTPRN	11	10.91	high	Yes	Yes	eggNOG, Hieranoid, Inparanoid, Isobase, OrthoDB, OrthoFinder, OrthoInspector, Panther, Phylome, RoundUp, TreeFam
466	FBgn0011603	ine	FastEpistasis	0	0	0	0	0	1	0	FBGN0011603	ine	33659	FBgn0011603	ine	Human	6535	11055	SLC6A8	4	3.94	high	Yes	Yes	Compara, eggNOG, OrthoDB, Panther
469	FBgn0031016	kek5	FastEpistasis	0	0	0	0	1	0	0	FBGN0031016	kek5	32930	FBgn0031016	kek5	Human	340745	23443	LRIT2	2	2	high	Yes	Yes	eggNOG, Panther
469	FBgn0031016	kek5	FastEpistasis	0	0	0	0	1	0	0	FBGN0031016	kek5	32930	FBgn0031016	kek5	Human	57622	29290	LRFN1	2	2	high	Yes	Yes	OrthoFinder, OrthoInspector
469	FBgn0031016	kek5	FastEpistasis	0	0	0	0	1	0	0	FBGN0031016	kek5	32930	FBgn0031016	kek5	Human	22865	23501	SLITRK3	2	1.96	high	Yes	Yes	Inparanoid, Phylome
470	FBgn0039862	kek6	FastEpistasis	0	0	0	0	1	0	0	FBGN0039862	kek6	43729	FBgn0039862	kek6	Human	57622	29290	LRFN1	2	2.05	high	Yes	Yes	Inparanoid, OrthoInspector
470	FBgn0039862	kek6	FastEpistasis	0	0	0	0	1	0	0	FBGN0039862	kek6	43729	FBgn0039862	kek6	Human	65078	18601	RTN4R	2	1.91	high	Yes	Yes	Hieranoid, Phylome
472	FBgn0013469	klu	FastEpistasis	0	0	1	0	0	0	0	FBGN0013469	klu	39228	FBgn0013469	klu	Human	51341	18078	ZBTB7A	2	1.98	high	Yes	Yes	Compara, Inparanoid
473	FBgn0010240	Lcch3	FastEpistasis	0	1	0	0	0	0	0	FBGN0010240	Lcch3	32554	FBgn0010240	Lcch3	Human	2562	4083	GABRB3	13	12.87	high	Yes	Yes	eggNOG, Hieranoid, Homologene, Inparanoid, OMA, OrthoDB, OrthoFinder, OrthoInspector, orthoMCL, Panther, Phylome, RoundUp, TreeFam
473	FBgn0010240	Lcch3	FastEpistasis	0	1	0	0	0	0	0	FBGN0010240	Lcch3	32554	FBgn0010240	Lcch3	Human	2560	4081	GABRB1	13	12.82	high	Yes	Yes	eggNOG, Hieranoid, Inparanoid, Isobase, OMA, OrthoDB, OrthoFinder, OrthoInspector, orthoMCL, Panther, Phylome, RoundUp, TreeFam
483	FBgn0028582	lqf	FastEpistasis	0	0	0	1	0	0	0	FBGN0028582	lqf	38846	FBgn0028582	lqf	Human	29924	21604	EPN1	14	13.74	high	Yes	Yes	Compara, eggNOG, Hieranoid, Homologene, Inparanoid, Isobase, OrthoDB, OrthoFinder, OrthoInspector, orthoMCL, Panther, Phylome, RoundUp, TreeFam
484	FBgn0040765	luna	FastEpistasis	1	0	1	1	0	0	0	FBGN0040765	luna	2768719	FBgn0040765	luna	Human	8609	6350	KLF7	8	7.88	high	Yes	Yes	Compara, eggNOG, Isobase, OrthoDB, OrthoInspector, Panther, RoundUp, TreeFam
484	FBgn0040765	luna	FastEpistasis	1	0	1	1	0	0	0	FBGN0040765	luna	2768719	FBgn0040765	luna	Human	1316	2235	KLF6	8	7.83	high	Yes	Yes	Compara, eggNOG, OrthoDB, OrthoInspector, orthoMCL, Panther, RoundUp, TreeFam
485	FBgn0004797	mdy	FastEpistasis	0	0	1	0	0	0	0	FBGN0004797	mdy	44887	FBgn0004797	mdy	Human	8694	2843	DGAT1	13	12.77	high	Yes	Yes	eggNOG, Hieranoid, Homologene, Isobase, OMA, OrthoDB, OrthoFinder, OrthoInspector, orthoMCL, Panther, Phylome, RoundUp, TreeFam
486	FBgn0265140	Meltrin	FastEpistasis	0	0	0	0	0	0	1	FBGN0265140	Meltrin	3772109	FBgn0265140	Meltrin	Human	8038	190	ADAM12	10	10.01	high	Yes	Yes	eggNOG, Hieranoid, Inparanoid, OMA, OrthoDB, OrthoFinder, OrthoInspector, Panther, Phylome, RoundUp
486	FBgn0265140	Meltrin	FastEpistasis	0	0	0	0	0	0	1	FBGN0265140	Meltrin	3772109	FBgn0265140	Meltrin	Human	8728	197	ADAM19	10	9.98	high	Yes	Yes	eggNOG, Hieranoid, Homologene, Inparanoid, OMA, OrthoDB, OrthoFinder, OrthoInspector, Panther, Phylome
488	FBgn0264695	Mhc	FastEpistasis	0	1	0	0	0	0	0	FBGN0264695	Mhc	35007	FBgn0264695	Mhc	Human	4625	7577	MYH7	12	11.86	high	Yes	Yes	eggNOG, Hieranoid, Homologene, Inparanoid, OMA, OrthoFinder, OrthoInspector, orthoMCL, Panther, Phylome, RoundUp, TreeFam
489	FBgn0011661	Moe	FastEpistasis	0	0	0	0	1	0	0	FBGN0011661	Moe	31816	FBgn0011661	Moe	Human	4478	7373	MSN	14	13.8	high	Yes	Yes	Compara, eggNOG, Hieranoid, Homologene, Inparanoid, OMA, OrthoDB, OrthoFinder, OrthoInspector, orthoMCL, Panther, Phylome, RoundUp, TreeFam
490	FBgn0052296	Mrtf	FastEpistasis	0	0	1	0	1	0	0	FBGN0052296	Mrtf	38338	FBgn0052296	Mrtf	Human	57591	14334	MRTFA	10	9.79	high	Yes	Yes	Compara, eggNOG, Hieranoid, Inparanoid, Isobase, OrthoFinder, OrthoInspector, orthoMCL, Panther, TreeFam
494	FBgn0086778	gfA	FastEpistasis	0	0	1	0	0	0	0	FBGN0086778	nAChRalpha7	32928	FBgn0086778	nAChRalpha7	Human	89832	15781	CHRFAM7A	12	11.81	high	Yes	Yes	eggNOG, Hieranoid, Inparanoid, Isobase, OMA, OrthoFinder, OrthoInspector, orthoMCL, Panther, Phylome, RoundUp, TreeFam
495	FBgn0261617	nej	FastEpistasis	0	1	0	0	0	0	0	FBGN0261617	nej	43856	FBgn0261617	nej	Human	2033	3373	EP300	12	11.81	high	Yes	Yes	eggNOG, Hieranoid, Inparanoid, Isobase, OMA, OrthoFinder, OrthoInspector, orthoMCL, Panther, Phylome, RoundUp, TreeFam
495	FBgn0261617	nej	FastEpistasis	0	1	0	0	0	0	0	FBGN0261617	nej	43856	FBgn0261617	nej	Human	1387	2348	CREBBP	12	11.79	high	Yes	Yes	Compara, eggNOG, Hieranoid, Inparanoid, OMA, OrthoFinder, OrthoInspector, orthoMCL, Panther, Phylome, RoundUp, TreeFam
497	FBgn0265416	Neto	FastEpistasis	0	0	0	1	0	0	0	FBGN0265416	Neto	32303	FBgn0265416	Neto	Human	81831	14644	NETO2	6	5.94	high	Yes	Yes	OrthoFinder, OrthoInspector, orthoMCL, Panther, Phylome, RoundUp
498	FBgn0053554	Nipped-A	FastEpistasis	1	0	0	0	0	0	0	FBGN0053554	Nipped-A	35483	FBgn0053554	Nipped-A	Human	8295	12347	TRRAP	13	12.71	high	Yes	Yes	Compara, eggNOG, Hieranoid, Homologene, Inparanoid, Isobase, OMA, OrthoFinder, OrthoInspector, orthoMCL, Panther, Phylome, TreeFam
500	FBgn0266464	Nsf2	FastEpistasis	0	0	0	0	1	0	0	FBGN0266464	Nsf2	41694	FBgn0266464	Nsf2	Human	4905	8016	NSF	14	13.72	high	Yes	Yes	Compara, eggNOG, Hieranoid, Homologene, Inparanoid, Isobase, OMA, OrthoDB, OrthoFinder, OrthoInspector, orthoMCL, Panther, Phylome, TreeFam
503	FBgn0003044	Pcl	FastEpistasis	1	0	0	0	0	0	0	FBGN0003044	Pcl	37069	FBgn0003044	Pcl	Human	26147	24566	PHF19	11	10.88	high	Yes	Yes	Compara, eggNOG, Hieranoid, Homologene, Inparanoid, OrthoFinder, OrthoInspector, Panther, Phylome, RoundUp, TreeFam
503	FBgn0003044	Pcl	FastEpistasis	1	0	0	0	0	0	0	FBGN0003044	Pcl	37069	FBgn0003044	Pcl	Human	22823	29535	MTF2	11	10.78	high	Yes	Yes	Compara, eggNOG, Hieranoid, Inparanoid, OrthoFinder, OrthoInspector, orthoMCL, Panther, Phylome, RoundUp, TreeFam
504	FBgn0085370	Pde11	FastEpistasis	0	0	0	0	0	1	0	FBGN0085370	Pde11	35107	FBgn0085370	Pde11	Human	8654	8784	PDE5A	11	10.75	high	Yes	Yes	Compara, eggNOG, Hieranoid, Homologene, OMA, OrthoDB, orthoMCL, Panther, Phylome, RoundUp, TreeFam
505	FBgn0264815	Pde1c	FastEpistasis	1	0	0	0	0	0	1	FBGN0264815	Pde1c	34594	FBgn0264815	Pde1c	Human	5136	8774	PDE1A	10	9.85	high	Yes	Yes	eggNOG, Hieranoid, Homologene, OMA, OrthoFinder, OrthoInspector, orthoMCL, Panther, Phylome, RoundUp
506	FBgn0259171	Pde9	FastEpistasis	0	0	0	0	0	0	1	FBGN0259171	Pde9	32233	FBgn0259171	Pde9	Human	5152	8795	PDE9A	6	5.84	high	Yes	Yes	eggNOG, OrthoDB, OrthoFinder, OrthoInspector, orthoMCL, RoundUp
507	FBgn0003068	per	FastEpistasis	0	1	0	0	0	0	0	FBGN0003068	per	31251	FBgn0003068	per	Human	8863	8847	PER3	8	8.01	high	Yes	Yes	Compara, eggNOG, Hieranoid, Inparanoid, OrthoFinder, OrthoInspector, Panther, RoundUp
508	FBgn0261811	pico	FastEpistasis	1	0	0	0	0	0	0	FBGN0261811	pico	33003	FBgn0261811	pico	Human	65059	14436	RAPH1	10	9.78	high	Yes	Yes	Compara, eggNOG, Inparanoid, OrthoFinder, OrthoInspector, orthoMCL, Panther, Phylome, RoundUp, TreeFam
509	FBgn0003091	Pkc53E	FastEpistasis	1	0	0	0	0	0	0	FBGN0003091	Pkc53E	48311	FBgn0003091	Pkc53E	Human	5578	9393	PRKCA	15	14.75	high	Yes	Yes	Compara, eggNOG, Hieranoid, Homologene, Inparanoid, Isobase, OMA, OrthoDB, OrthoFinder, OrthoInspector, orthoMCL, Panther, Phylome, RoundUp, TreeFam
510	FBgn0003093	Pkc98E	FastEpistasis	0	0	1	0	0	0	0	FBGN0003093	Pkc98E	43428	FBgn0003093	Pkc98E	Human	5581	9401	PRKCE	14	13.82	high	Yes	Yes	eggNOG, Hieranoid, Homologene, Inparanoid, Isobase, OMA, OrthoDB, OrthoFinder, OrthoInspector, orthoMCL, Panther, Phylome, RoundUp, TreeFam
511	FBgn0003118	pnt	FastEpistasis	0	0	0	0	1	0	0	FBGN0003118	pnt	42757	FBgn0003118	pnt	Human	2113	3488	ETS1	9	8.85	high	Yes	Yes	eggNOG, Inparanoid, OrthoFinder, OrthoInspector, orthoMCL, Panther, Phylome, RoundUp, TreeFam
512	FBgn0036239	Pop2	FastEpistasis	0	0	0	0	0	0	1	FBGN0036239	Pop2	39366	FBgn0036239	Pop2	Human	29883	14101	CNOT7	15	14.75	high	Yes	Yes	Compara, eggNOG, Hieranoid, Homologene, Inparanoid, Isobase, OMA, OrthoDB, OrthoFinder, OrthoInspector, orthoMCL, Panther, Phylome, RoundUp, TreeFam
513	FBgn0052792	CG32792	FastEpistasis	1	0	0	0	0	0	0	FBGN0052792	ppk8	318213	FBgn0052792	ppk8	Human	51802	17537	ASIC5	7	7.05	high	Yes	Yes	eggNOG, OMA, OrthoDB, OrthoFinder, OrthoInspector, Panther, RoundUp
515	FBgn0031814	retm	FastEpistasis	0	0	0	0	1	0	0	FBGN0031814	retm	33899	FBgn0031814	retm	Human	9717	29032	SEC14L5	14	13.72	high	Yes	Yes	Compara, eggNOG, Hieranoid, Homologene, Inparanoid, Isobase, OMA, OrthoDB, OrthoFinder, OrthoInspector, orthoMCL, Panther, Phylome, TreeFam
518	FBgn0036257	RhoGAP68F	FastEpistasis	0	0	0	0	0	1	0	FBGN0036257	RhoGAP68F	39385	FBgn0036257	RhoGAP68F	Human	392	673	ARHGAP1	15	14.75	high	Yes	Yes	Compara, eggNOG, Hieranoid, Homologene, Inparanoid, Isobase, OMA, OrthoDB, OrthoFinder, OrthoInspector, orthoMCL, Panther, Phylome, RoundUp, TreeFam
519	FBgn0083940	CG34104	FastEpistasis	0	0	0	0	0	1	0	FBGN0083940	RhoU	31945	FBgn0083940	RhoU	Human	58480	17794	RHOU	4	3.92	high	Yes	Yes	eggNOG, OrthoDB, Panther, Phylome
519	FBgn0083940	CG34104	FastEpistasis	0	0	0	0	0	1	0	FBGN0083940	RhoU	31945	FBgn0083940	RhoU	Human	171177	18313	RHOV	4	3.92	high	Yes	Yes	eggNOG, OrthoDB, Panther, Phylome
521	FBgn0041096	rols	FastEpistasis	0	0	0	0	0	0	1	FBGN0041096	rols	39368	FBgn0041096	rols	Human	26115	30212	TANC2	11	10.81	high	Yes	Yes	eggNOG, Inparanoid, Isobase, OrthoDB, OrthoFinder, OrthoInspector, orthoMCL, Panther, Phylome, RoundUp, TreeFam
523	FBgn0052103	CG32103	FastEpistasis	0	1	0	0	0	0	0	FBGN0052103	CG32103	39415	FBgn0052103	SCaMC	Human	114789	20663	SLC25A25	13	12.87	high	Yes	Yes	eggNOG, Hieranoid, Homologene, Inparanoid, OMA, OrthoDB, OrthoFinder, OrthoInspector, orthoMCL, Panther, Phylome, RoundUp, TreeFam
524	FBgn0003330	Sce	FastEpistasis	0	0	1	0	0	0	0	FBGN0003330	Sce	43327	FBgn0003330	Sce	Human	6045	10061	RNF2	13	12.87	high	Yes	Yes	eggNOG, Hieranoid, Homologene, Inparanoid, OMA, OrthoDB, OrthoFinder, OrthoInspector, orthoMCL, Panther, Phylome, RoundUp, TreeFam
525	FBgn0021764	sdk	FastEpistasis	0	0	0	1	0	0	1	FBGN0021764	sdk	31017	FBgn0021764	sdk	Human	54549	19308	SDK2	11	10.87	high	Yes	Yes	eggNOG, Hieranoid, Homologene, Inparanoid, OMA, OrthoDB, OrthoFinder, OrthoInspector, Phylome, RoundUp, TreeFam
526	FBgn0003380	Sh	FastEpistasis	0	0	0	0	0	1	1	FBGN0003380	Sh	32780	FBgn0003380	Sh	Human	3736	6218	KCNA1	11	10.85	high	Yes	Yes	eggNOG, Hieranoid, Inparanoid, Isobase, OMA, OrthoFinder, OrthoInspector, orthoMCL, Panther, Phylome, RoundUp
527	FBgn0003386	Shaw	FastEpistasis	0	0	0	0	1	0	0	FBGN0003386	Shaw	33599	FBgn0003386	Shaw	Human	3747	6234	KCNC2	13	12.87	high	Yes	Yes	eggNOG, Hieranoid, Homologene, Inparanoid, OMA, OrthoDB, OrthoFinder, OrthoInspector, orthoMCL, Panther, Phylome, RoundUp, TreeFam
527	FBgn0003386	Shaw	FastEpistasis	0	0	0	0	1	0	0	FBGN0003386	Shaw	33599	FBgn0003386	Shaw	Human	3746	6233	KCNC1	13	12.82	high	Yes	Yes	eggNOG, Hieranoid, Inparanoid, Isobase, OMA, OrthoDB, OrthoFinder, OrthoInspector, orthoMCL, Panther, Phylome, RoundUp, TreeFam
528	FBgn0263873	sick	FastEpistasis	0	0	0	1	0	0	0	FBGN0263873	sick	35277	FBgn0263873	sick	Human	89797	15997	NAV2	9	8.94	high	Yes	Yes	eggNOG, Hieranoid, Inparanoid, Isobase, OrthoFinder, OrthoInspector, Panther, Phylome, RoundUp
530	FBgn0262103	Sik3	FastEpistasis	0	0	1	0	0	0	0	FBGN0262103	Sik3	37152	FBgn0262103	Sik3	Human	23387	29165	SIK3	3	2.84	high	Yes	Yes	eggNOG, Phylome, RoundUp
531	FBgn0051163	SKIP	FastEpistasis	0	0	0	0	0	1	0	FBGN0051163	SKIP	42601	FBgn0051163	SKIP	Human	54440	15975	SASH3	6	5.9	high	Yes	Yes	eggNOG, OrthoInspector, Panther, Phylome, RoundUp, TreeFam
531	FBgn0051163	SKIP	FastEpistasis	0	0	0	0	0	1	0	FBGN0051163	SKIP	42601	FBgn0051163	SKIP	Human	64092	10528	SAMSN1	6	5.9	high	Yes	Yes	eggNOG, OrthoInspector, Panther, Phylome, RoundUp, TreeFam
532	FBgn0037203	slif	FastEpistasis	0	0	0	0	0	1	0	FBGN0037203	slif	40510	FBgn0037203	slif	Human	6541	11057	SLC7A1	13	12.84	high	Yes	Yes	Compara, eggNOG, Hieranoid, Homologene, Inparanoid, OMA, OrthoDB, OrthoFinder, OrthoInspector, orthoMCL, Panther, Phylome, RoundUp
533	FBgn0086906	sls	FastEpistasis	0	0	1	0	0	0	0	FBGN0086906	sls	44013	FBgn0086906	sls	Human	83872	19194	HMCN1	3	2.71	high	Yes	Yes	eggNOG, orthoMCL, Phylome
534	FBgn0003435	sm	FastEpistasis	0	0	1	0	0	0	0	FBGN0003435	sm	37254	FBgn0003435	sm	Human	3191	5045	HNRNPL	12	11.8	high	Yes	Yes	Compara, eggNOG, Hieranoid, Homologene, Inparanoid, OMA, OrthoDB, OrthoFinder, OrthoInspector, Phylome, RoundUp, TreeFam
535	FBgn0265523	Smr	FastEpistasis	0	0	0	0	0	1	0	FBGN0265523	Smr	32225	FBgn0265523	Smr	Human	9611	7672	NCOR1	10	9.89	high	Yes	Yes	eggNOG, Hieranoid, Inparanoid, Isobase, OrthoFinder, OrthoInspector, orthoMCL, Panther, RoundUp, TreeFam
537	FBgn0042630	Sox21b	FastEpistasis	0	1	0	0	0	0	0	FBGN0042630	Sox21b	39569	FBgn0042630	Sox21b	Human	11166	11197	SOX21	8	7.83	high	Yes	Yes	Compara, eggNOG, OrthoFinder, OrthoInspector, Panther, Phylome, RoundUp, TreeFam
537	FBgn0042630	Sox21b	FastEpistasis	0	1	0	0	0	0	0	FBGN0042630	Sox21b	39569	FBgn0042630	Sox21b	Human	8403	11193	SOX14	8	7.8	high	Yes	Yes	eggNOG, OrthoFinder, OrthoInspector, orthoMCL, Panther, Phylome, RoundUp, TreeFam
538	FBgn0003499	sr	FastEpistasis	0	1	0	0	0	0	0	FBGN0003499	sr	42162	FBgn0003499	sr	Human	1959	3239	EGR2	6	5.94	high	Yes	Yes	Isobase, OrthoFinder, orthoMCL, Panther, RoundUp, TreeFam
539	FBgn0286203	laccase2	FastEpistasis	0	0	1	0	0	0	0	FBGN0286203	stw	35494	FBgn0286203	stw	Human	341208	30477	HEPHL1	4	4.04	high	Yes	Yes	eggNOG, OrthoDB, Panther, RoundUp
539	FBgn0286203	laccase2	FastEpistasis	0	0	1	0	0	0	0	FBGN0286203	stw	35494	FBgn0286203	stw	Human	1356	2295	CP	4	4.04	high	Yes	Yes	eggNOG, OrthoDB, Panther, RoundUp
539	FBgn0286203	laccase2	FastEpistasis	0	0	1	0	0	0	0	FBGN0286203	stw	35494	FBgn0286203	stw	Human	9843	4866	HEPH	4	4.04	high	Yes	Yes	eggNOG, OrthoDB, Panther, RoundUp
540	FBgn0034135	Syn2	FastEpistasis	0	0	1	0	0	0	0	FBGN0034135	Syn2	36848	FBgn0034135	Syn2	Human	54212	13740	SNTG1	14	13.8	high	Yes	Yes	Compara, eggNOG, Hieranoid, Homologene, Inparanoid, OMA, OrthoDB, OrthoFinder, OrthoInspector, orthoMCL, Panther, Phylome, RoundUp, TreeFam
541	FBgn0267001	Ten-a	FastEpistasis	0	0	0	0	0	0	1	FBGN0267001	Ten-a	32183	FBgn0267001	Ten-a	Human	55714	29944	TENM3	12	11.77	high	Yes	Yes	Compara, eggNOG, Hieranoid, Homologene, Inparanoid, OMA, OrthoDB, OrthoFinder, orthoMCL, Panther, Phylome, TreeFam
542	FBgn0263392	CG43444	FastEpistasis	1	0	0	0	0	0	0	FBGN0263392	Tet	38347	FBgn0263392	Tet	Human	200424	28313	TET3	8	7.93	high	Yes	Yes	eggNOG, Inparanoid, Isobase, OrthoFinder, OrthoInspector, orthoMCL, Panther, RoundUp
542	FBgn0263392	CG43444	FastEpistasis	1	0	0	0	0	0	0	FBGN0263392	Tet	38347	FBgn0263392	Tet	Human	80312	29484	TET1	8	7.75	high	Yes	Yes	eggNOG, Isobase, OrthoInspector, orthoMCL, Panther, Phylome, RoundUp, TreeFam
545	FBgn0015600	toc	FastEpistasis	0	0	0	0	0	1	0	FBGN0015600	toc	33526	FBgn0015600	toc	Human	23281	20595	MTUS2	5	5.13	high	Yes	Yes	Hieranoid, OrthoFinder, OrthoInspector, Panther, RoundUp
546	FBgn0016041	Tom40	FastEpistasis	1	0	0	0	0	0	0	FBGN0016041	Tom40	44978	FBgn0016041	Tom40	Human	10452	18001	TOMM40	15	14.75	high	Yes	Yes	Compara, eggNOG, Hieranoid, Homologene, Inparanoid, Isobase, OMA, OrthoDB, OrthoFinder, OrthoInspector, orthoMCL, Panther, Phylome, RoundUp, TreeFam
548	FBgn0284408	trol	FastEpistasis	0	0	1	0	0	0	0	FBGN0284408	trol	45320	FBgn0284408	trol	Human	3339	5273	HSPG2	11	10.65	high	Yes	Yes	Compara, eggNOG, Hieranoid, OMA, OrthoDB, OrthoFinder, OrthoInspector, orthoMCL, Phylome, RoundUp, TreeFam
549	FBgn0265974	ttv	FastEpistasis	0	0	0	0	0	1	0	FBGN0265974	ttv	36614	FBgn0265974	ttv	Human	2131	3512	EXT1	13	12.81	high	Yes	Yes	eggNOG, Hieranoid, Homologene, Inparanoid, Isobase, OMA, OrthoFinder, OrthoInspector, orthoMCL, Panther, Phylome, RoundUp, TreeFam
550	FBgn0003896	tup	FastEpistasis	0	0	0	0	1	0	0	FBGN0003896	tup	35147	FBgn0003896	tup	Human	3670	6132	ISL1	14	13.8	high	Yes	Yes	Compara, eggNOG, Hieranoid, Homologene, Inparanoid, OMA, OrthoDB, OrthoFinder, OrthoInspector, orthoMCL, Panther, Phylome, RoundUp, TreeFam
551	FBgn0010473	tutl	FastEpistasis	0	0	0	1	0	0	0	FBGN0010473	tutl	46015	FBgn0010473	tutl	Human	57549	18132	IGSF9	12	11.87	high	Yes	Yes	eggNOG, Hieranoid, Inparanoid, OMA, OrthoDB, OrthoFinder, OrthoInspector, orthoMCL, Panther, Phylome, RoundUp, TreeFam
552	FBgn0036136	Ufd1-like	FastEpistasis	0	0	0	0	0	1	0	FBGN0036136	Ufd1-like	39254	FBgn0036136	Ufd1-like	Human	7353	12520	UFD1	15	14.75	high	Yes	Yes	Compara, eggNOG, Hieranoid, Homologene, Inparanoid, Isobase, OMA, OrthoDB, OrthoFinder, OrthoInspector, orthoMCL, Panther, Phylome, RoundUp, TreeFam
553	FBgn0267002	unc-104	FastEpistasis	0	0	0	0	0	1	0	FBGN0267002	unc-104	36876	FBgn0267002	unc-104	Human	547	888	KIF1A	11	10.78	high	Yes	Yes	eggNOG, Homologene, Inparanoid, Isobase, OMA, OrthoFinder, OrthoInspector, orthoMCL, Panther, Phylome, TreeFam
554	FBgn0035756	unc-13-4A	FastEpistasis	0	0	0	0	0	1	0	FBGN0035756	unc-13-4A	38801	FBgn0035756	unc-13-4A	Human	8938	948	BAIAP3	13	12.89	high	Yes	Yes	Compara, eggNOG, Hieranoid, Homologene, Inparanoid, OMA, OrthoDB, OrthoFinder, OrthoInspector, orthoMCL, Panther, RoundUp, TreeFam
555	FBgn0052479	CG32479	FastEpistasis	0	0	0	0	0	1	0	FBGN0052479	Usp10	38103	FBgn0052479	Usp10	Human	9100	12608	USP10	7	6.7	high	Yes	Yes	eggNOG, OrthoFinder, OrthoInspector, orthoMCL, Phylome, RoundUp, TreeFam
556	FBgn0039269	veli	FastEpistasis	0	0	0	1	0	0	0	FBGN0039269	veli	43003	FBgn0039269	veli	Human	64130	17788	LIN7B	13	12.9	high	Yes	Yes	Compara, eggNOG, Hieranoid, Homologene, Inparanoid, OMA, OrthoDB, OrthoFinder, OrthoInspector, Panther, Phylome, RoundUp, TreeFam
557	FBgn0262511	Vha44	FastEpistasis	0	0	0	0	1	0	0	FBGN0262511	Vha44	36826	FBgn0262511	Vha44	Human	528	856	ATP6V1C1	15	14.75	high	Yes	Yes	Compara, eggNOG, Hieranoid, Homologene, Inparanoid, Isobase, OMA, OrthoDB, OrthoFinder, OrthoInspector, orthoMCL, Panther, Phylome, RoundUp, TreeFam
558	FBgn0033194	Vps13	FastEpistasis	0	0	1	0	0	0	0	FBGN0033194	Vps13	35693	FBgn0033194	Vps13	Human	23230	1908	VPS13A	13	12.87	high	Yes	Yes	eggNOG, Hieranoid, Homologene, Inparanoid, OMA, OrthoDB, OrthoFinder, OrthoInspector, orthoMCL, Panther, Phylome, RoundUp, TreeFam
560	FBgn0036318	Wbp2	FastEpistasis	0	0	0	0	0	1	0	FBGN0036318	Wbp2	39460	FBgn0036318	Wbp2	Human	23558	12738	WBP2	11	10.89	high	Yes	Yes	Compara, Hieranoid, Inparanoid, OMA, OrthoFinder, OrthoInspector, orthoMCL, Panther, Phylome, RoundUp, TreeFam
561	FBgn0028516	ZnT35C	FastEpistasis	1	0	0	0	0	0	0	FBGN0028516	ZnT35C	34890	FBgn0028516	ZnT35C	Human	7780	11013	SLC30A2	11	10.87	high	Yes	Yes	eggNOG, Homologene, Inparanoid, OMA, OrthoDB, OrthoFinder, orthoMCL, Panther, Phylome, RoundUp, TreeFam
562	FBgn0052311	zormin	FastEpistasis	0	0	0	0	0	0	1	FBGN0052311	zormin	2769001	FBgn0052311	zormin	Human	100996693	51251	SPEGNB	2	1.93	high	Yes	Yes	Compara, OrthoFinder
562	FBgn0052311	zormin	FastEpistasis	0	0	0	0	0	0	1	FBGN0052311	zormin	2769001	FBgn0052311	zormin	Human	23022	17068	PALLD	2	1.91	high	Yes	Yes	OrthoFinder, Phylome
562	FBgn0052311	zormin	FastEpistasis	0	0	0	0	0	0	1	FBGN0052311	zormin	2769001	FBgn0052311	zormin	Human	84665	23246	MYPN	2	1.91	high	Yes	Yes	OrthoFinder, Phylome
562	FBgn0052311	zormin	FastEpistasis	0	0	0	0	0	0	1	FBGN0052311	zormin	2769001	FBgn0052311	zormin	Human	285025	26821	CCDC141	2	1.81	high	Yes	Yes	eggNOG, Phylome
3	FBgn0000114	aret	FastLMM_FastEpistasis	0	0	0	0	0	0	1	FBGN0000114	bru1	34648	FBgn0000114	bru1	Human	60680	14058	CELF5	3	2.81	low	No	No	eggNOG, OrthoDB, orthoMCL
7	FBgn0053158	CG33158	FastLMM_FastEpistasis	0	1	0	0	0	0	1	FBGN0053158	CG33158	39834	FBgn0053158	CG33158	Human	1938	3214	EEF2	2	1.91	low	No	No	eggNOG, OrthoDB
7	FBgn0053158	CG33158	FastLMM_FastEpistasis	0	1	0	0	0	0	1	FBGN0053158	CG33158	39834	FBgn0053158	CG33158	Human	9343	30858	EFTUD2	2	1.91	low	No	No	eggNOG, OrthoDB
8	FBgn0263131	CG43373	FastLMM_FastEpistasis	0	0	0	0	0	0	1	FBGN0263131	CG43373	39835	FBgn0263131	CG43373	Human	107	232	ADCY1	2	1.91	low	No	No	eggNOG, OrthoDB
9	FBgn0265595	CG42683	FastLMM_FastEpistasis	1	0	1	0	1	0	0	FBGN0265595	CG44422	32063	FBgn0265595	CG44422	Human	7447	12722	VSNL1	2	1.91	low	No	No	eggNOG, OrthoDB
9	FBgn0265595	CG42683	FastLMM_FastEpistasis	1	0	1	0	1	0	0	FBGN0265595	CG44422	32063	FBgn0265595	CG44422	Human	51440	18212	HPCAL4	2	1.91	low	No	No	eggNOG, OrthoDB
9	FBgn0265595	CG42683	FastLMM_FastEpistasis	1	0	1	0	1	0	0	FBGN0265595	CG44422	32063	FBgn0265595	CG44422	Human	23413	3953	NCS1	2	1.91	low	No	No	eggNOG, OrthoDB
9	FBgn0265595	CG42683	FastLMM_FastEpistasis	1	0	1	0	1	0	0	FBGN0265595	CG44422	32063	FBgn0265595	CG44422	Human	3241	5145	HPCAL1	2	1.91	low	No	No	eggNOG, OrthoDB
12	FBgn0031414	eys	FastLMM_FastEpistasis	0	1	0	1	0	0	0	FBGN0031414	eys	3771890	FBgn0031414	eys	Human	133584	26810	EGFLAM	3	2.86	low	No	No	eggNOG, OrthoFinder, TreeFam
12	FBgn0031414	eys	FastLMM_FastEpistasis	0	1	0	1	0	0	0	FBGN0031414	eys	3771890	FBgn0031414	eys	Human	375790	329	AGRN	2	1.86	low	No	No	eggNOG, TreeFam
13	FBgn0264606	CG43955	FastLMM_FastEpistasis	0	1	0	0	1	0	0	FBGN0264606	Fife	38337	FBgn0264606	Fife	Human	140730	16183	RIMS4	2	2	low	No	No	eggNOG, Panther
13	FBgn0264606	CG43955	FastLMM_FastEpistasis	0	1	0	0	1	0	0	FBGN0264606	Fife	38337	FBgn0264606	Fife	Human	9783	21292	RIMS3	2	2	low	No	No	eggNOG, Panther
13	FBgn0264606	CG43955	FastLMM_FastEpistasis	0	1	0	0	1	0	0	FBGN0264606	Fife	38337	FBgn0264606	Fife	Human	9699	17283	RIMS2	2	2	low	No	No	eggNOG, Panther
17	FBgn0267033	mamo	FastLMM_FastEpistasis	0	0	1	1	0	1	0	FBGN0267033	mamo	32353	FBgn0267033	mamo	Human	84878	23715	ZBTB45	1	1.05	low	Yes	Yes	Inparanoid
17	FBgn0267033	mamo	FastLMM_FastEpistasis	0	0	1	1	0	1	0	FBGN0267033	mamo	32353	FBgn0267033	mamo	Human	6670	11208	SP3	1	1.03	low	Yes	No	RoundUp
17	FBgn0267033	mamo	FastLMM_FastEpistasis	0	0	1	1	0	1	0	FBGN0267033	mamo	32353	FBgn0267033	mamo	Human	7071	11810	KLF10	1	1.03	low	Yes	No	RoundUp
17	FBgn0267033	mamo	FastLMM_FastEpistasis	0	0	1	1	0	1	0	FBGN0267033	mamo	32353	FBgn0267033	mamo	Human	389058	14529	SP5	1	1.03	low	Yes	No	RoundUp
17	FBgn0267033	mamo	FastLMM_FastEpistasis	0	0	1	1	0	1	0	FBGN0267033	mamo	32353	FBgn0267033	mamo	Human	6667	11205	SP1	1	1.03	low	Yes	No	RoundUp
17	FBgn0267033	mamo	FastLMM_FastEpistasis	0	0	1	1	0	1	0	FBGN0267033	mamo	32353	FBgn0267033	mamo	Human	85406	24581	DNAJC14	1	1	low	Yes	No	Hieranoid
17	FBgn0267033	mamo	FastLMM_FastEpistasis	0	0	1	1	0	1	0	FBGN0267033	mamo	32353	FBgn0267033	mamo	Human	643376	37214	BTBD18	1	1	low	Yes	No	OrthoFinder
17	FBgn0267033	mamo	FastLMM_FastEpistasis	0	0	1	1	0	1	0	FBGN0267033	mamo	32353	FBgn0267033	mamo	Human	282890	13847	ZNF311	1	0.96	low	Yes	No	TreeFam
17	FBgn0267033	mamo	FastLMM_FastEpistasis	0	0	1	1	0	1	0	FBGN0267033	mamo	32353	FBgn0267033	mamo	Human	147808	33111	ZNF784	1	0.95	low	Yes	Yes	Isobase
24	FBgn0085407	Pvf3	FastLMM_FastEpistasis	0	0	1	0	0	1	1	FBGN0085407	Pvf3	33995	FBgn0085407	Pvf3	Human	5228	8893	PGF	1	1.01	low	Yes	No	OrthoDB
24	FBgn0085407	Pvf3	FastLMM_FastEpistasis	0	0	1	0	0	1	1	FBGN0085407	Pvf3	33995	FBgn0085407	Pvf3	Human	7424	12682	VEGFC	1	1.01	low	Yes	No	OrthoDB
24	FBgn0085407	Pvf3	FastLMM_FastEpistasis	0	0	1	0	0	1	1	FBGN0085407	Pvf3	33995	FBgn0085407	Pvf3	Human	2277	3708	VEGFD	1	1.01	low	Yes	No	OrthoDB
24	FBgn0085407	Pvf3	FastLMM_FastEpistasis	0	0	1	0	0	1	1	FBGN0085407	Pvf3	33995	FBgn0085407	Pvf3	Human	7422	12680	VEGFA	1	1.01	low	Yes	No	OrthoDB
24	FBgn0085407	Pvf3	FastLMM_FastEpistasis	0	0	1	0	0	1	1	FBGN0085407	Pvf3	33995	FBgn0085407	Pvf3	Human	7423	12681	VEGFB	1	1.01	low	Yes	No	OrthoDB
26	FBgn0260943	Rbp6	FastLMM_FastEpistasis	0	1	0	0	0	1	0	FBGN0260943	Rbp6	39919	FBgn0260943	Rbp6	Human	26528	2683	DAZAP1	3	2.94	low	No	No	eggNOG, OrthoDB, RoundUp
26	FBgn0260943	Rbp6	FastLMM_FastEpistasis	0	1	0	0	0	1	0	FBGN0260943	Rbp6	39919	FBgn0260943	Rbp6	Human	9987	5037	HNRNPDL	2	2.01	low	No	No	OrthoDB, OrthoFinder
32	FBgn0004168	5-HT1A	FastLMM	0	0	0	0	1	0	0	FBGN0004168	5-HT1A	37196	FBgn0004168	5-HT1A	Human	3351	5287	HTR1B	3	2.94	low	No	No	Compara, Panther, Phylome
32	FBgn0004168	5-HT1A	FastLMM	0	0	0	0	1	0	0	FBGN0004168	5-HT1A	37196	FBgn0004168	5-HT1A	Human	3354	5291	HTR1E	3	2.94	low	No	No	Compara, Panther, Phylome
32	FBgn0004168	5-HT1A	FastLMM	0	0	0	0	1	0	0	FBGN0004168	5-HT1A	37196	FBgn0004168	5-HT1A	Human	3355	5292	HTR1F	3	2.94	low	No	No	Compara, Panther, Phylome
32	FBgn0004168	5-HT1A	FastLMM	0	0	0	0	1	0	0	FBGN0004168	5-HT1A	37196	FBgn0004168	5-HT1A	Human	3352	5289	HTR1D	3	2.91	low	No	No	orthoMCL, Panther, Phylome
35	FBgn0260941	app	FastLMM	1	0	0	0	0	0	0	FBGN0260941	app	39399	FBgn0260941	app	Human	25921	18472	ZDHHC5	3	2.94	low	No	No	eggNOG, OrthoDB, RoundUp
35	FBgn0260941	app	FastLMM	1	0	0	0	0	0	0	FBGN0260941	app	39399	FBgn0260941	app	Human	29801	18474	ZDHHC8	2	1.93	low	No	No	eggNOG, RoundUp
35	FBgn0260941	app	FastLMM	1	0	0	0	0	0	0	FBGN0260941	app	39399	FBgn0260941	app	Human	55146	18471	ZDHHC4	2	1.93	low	No	No	eggNOG, RoundUp
36	FBgn0036111	Aps	FastLMM	0	0	0	0	0	1	0	FBGN0036111	Aps	39226	FBgn0036111	Aps	Human	100529239	49181	RPS10-NUDT3	2	1.91	low	No	No	eggNOG, OrthoDB
41	FBgn0020762	Atet	FastLMM	0	0	1	0	0	0	0	FBGN0020762	Atet	33636	FBgn0020762	Atet	Human	9429	74	ABCG2	2	1.9	low	No	No	eggNOG, OrthoFinder
41	FBgn0020762	Atet	FastLMM	0	0	1	0	0	0	0	FBGN0020762	Atet	33636	FBgn0020762	Atet	Human	64241	13887	ABCG8	2	1.83	low	No	No	Compara, eggNOG
45	FBgn0043362	bchs	FastLMM	0	1	0	0	0	0	0	FBGN0043362	bchs	33819	FBgn0043362	bchs	Human	124997	26600	WDR81	2	1.91	low	No	No	eggNOG, OrthoDB
45	FBgn0043362	bchs	FastLMM	0	1	0	0	0	0	0	FBGN0043362	bchs	33819	FBgn0043362	bchs	Human	1130	1968	LYST	2	1.91	low	No	No	eggNOG, OrthoDB
47	FBgn0264001	bru-3	FastLMM	0	1	0	0	0	0	0	FBGN0264001	bru3	39527	FBgn0264001	bru3	Human	10659	2550	CELF2	3	2.81	low	No	No	eggNOG, OrthoDB, orthoMCL
47	FBgn0264001	bru-3	FastLMM	0	1	0	0	0	0	0	FBGN0264001	bru3	39527	FBgn0264001	bru3	Human	10658	2549	CELF1	3	2.81	low	No	No	eggNOG, OrthoDB, orthoMCL
49	FBgn0285896	btl	FastLMM	0	0	1	0	1	0	0	FBGN0285896	btl	39564	FBgn0285896	btl	Human	5156	8803	PDGFRA	2	1.85	low	No	No	eggNOG, Isobase
50	FBgn0266756	btsz	FastLMM	0	1	0	0	0	0	0	FBGN0266756	btsz	3346167	FBgn0266756	btsz	Human	51760	24119	SYT17	2	1.91	low	No	No	eggNOG, OrthoDB
50	FBgn0266756	btsz	FastLMM	0	1	0	0	0	0	0	FBGN0266756	btsz	3346167	FBgn0266756	btsz	Human	91683	18381	SYT12	2	1.91	low	No	No	eggNOG, OrthoDB
50	FBgn0266756	btsz	FastLMM	0	1	0	0	0	0	0	FBGN0266756	btsz	3346167	FBgn0266756	btsz	Human	84258	11511	SYT3	2	1.91	low	No	No	eggNOG, OrthoDB
50	FBgn0266756	btsz	FastLMM	0	1	0	0	0	0	0	FBGN0266756	btsz	3346167	FBgn0266756	btsz	Human	102724488	NA	LOC102724488	2	1.91	low	No	No	eggNOG, OrthoDB
50	FBgn0266756	btsz	FastLMM	0	1	0	0	0	0	0	FBGN0266756	btsz	3346167	FBgn0266756	btsz	Human	341359	19266	SYT10	2	1.91	low	No	No	eggNOG, OrthoDB
50	FBgn0266756	btsz	FastLMM	0	1	0	0	0	0	0	FBGN0266756	btsz	3346167	FBgn0266756	btsz	Human	6857	11509	SYT1	2	1.91	low	No	No	eggNOG, OrthoDB
50	FBgn0266756	btsz	FastLMM	0	1	0	0	0	0	0	FBGN0266756	btsz	3346167	FBgn0266756	btsz	Human	9066	11514	SYT7	2	1.91	low	No	No	eggNOG, OrthoDB
50	FBgn0266756	btsz	FastLMM	0	1	0	0	0	0	0	FBGN0266756	btsz	3346167	FBgn0266756	btsz	Human	6861	11513	SYT5	2	1.91	low	No	No	eggNOG, OrthoDB
50	FBgn0266756	btsz	FastLMM	0	1	0	0	0	0	0	FBGN0266756	btsz	3346167	FBgn0266756	btsz	Human	143425	19265	SYT9	2	1.91	low	No	No	eggNOG, OrthoDB
50	FBgn0266756	btsz	FastLMM	0	1	0	0	0	0	0	FBGN0266756	btsz	3346167	FBgn0266756	btsz	Human	6860	11512	SYT4	2	1.91	low	No	No	eggNOG, OrthoDB
50	FBgn0266756	btsz	FastLMM	0	1	0	0	0	0	0	FBGN0266756	btsz	3346167	FBgn0266756	btsz	Human	57586	14962	SYT13	2	1.91	low	No	No	eggNOG, OrthoDB
50	FBgn0266756	btsz	FastLMM	0	1	0	0	0	0	0	FBGN0266756	btsz	3346167	FBgn0266756	btsz	Human	127833	11510	SYT2	2	1.91	low	No	No	eggNOG, OrthoDB
50	FBgn0266756	btsz	FastLMM	0	1	0	0	0	0	0	FBGN0266756	btsz	3346167	FBgn0266756	btsz	Human	23208	19239	SYT11	2	1.91	low	No	No	eggNOG, OrthoDB
50	FBgn0266756	btsz	FastLMM	0	1	0	0	0	0	0	FBGN0266756	btsz	3346167	FBgn0266756	btsz	Human	90019	19264	SYT8	2	1.91	low	No	No	eggNOG, OrthoDB
52	FBgn0010014	CanB	FastLMM	0	1	0	0	0	0	0	FBGN0010014	CanB	44317	FBgn0010014	CanB	Human	116143	25176	WDR92	2	1.94	low	No	No	Compara, OMA
52	FBgn0010014	CanB	FastLMM	0	1	0	0	0	0	0	FBGN0010014	CanB	44317	FBgn0010014	CanB	Human	10519	16920	CIB1	2	1.91	low	No	No	eggNOG, OrthoDB
52	FBgn0010014	CanB	FastLMM	0	1	0	0	0	0	0	FBGN0010014	CanB	44317	FBgn0010014	CanB	Human	130106	33703	CIB4	2	1.91	low	No	No	eggNOG, OrthoDB
52	FBgn0010014	CanB	FastLMM	0	1	0	0	0	0	0	FBGN0010014	CanB	44317	FBgn0010014	CanB	Human	54997	26065	TESC	2	1.91	low	No	No	eggNOG, OrthoDB
52	FBgn0010014	CanB	FastLMM	0	1	0	0	0	0	0	FBGN0010014	CanB	44317	FBgn0010014	CanB	Human	63928	24927	CHP2	2	1.91	low	No	No	eggNOG, OrthoDB
52	FBgn0010014	CanB	FastLMM	0	1	0	0	0	0	0	FBGN0010014	CanB	44317	FBgn0010014	CanB	Human	11261	17433	CHP1	2	1.91	low	No	No	eggNOG, OrthoDB
53	FBgn0015614	CanB2	FastLMM	0	0	0	0	0	0	1	FBGN0015614	CanB2	46456	FBgn0015614	CanB2	Human	116143	25176	WDR92	2	1.94	low	No	No	Compara, OMA
53	FBgn0015614	CanB2	FastLMM	0	0	0	0	0	0	1	FBGN0015614	CanB2	46456	FBgn0015614	CanB2	Human	10519	16920	CIB1	2	1.91	low	No	No	eggNOG, OrthoDB
53	FBgn0015614	CanB2	FastLMM	0	0	0	0	0	0	1	FBGN0015614	CanB2	46456	FBgn0015614	CanB2	Human	130106	33703	CIB4	2	1.91	low	No	No	eggNOG, OrthoDB
53	FBgn0015614	CanB2	FastLMM	0	0	0	0	0	0	1	FBGN0015614	CanB2	46456	FBgn0015614	CanB2	Human	54997	26065	TESC	2	1.91	low	No	No	eggNOG, OrthoDB
53	FBgn0015614	CanB2	FastLMM	0	0	0	0	0	0	1	FBGN0015614	CanB2	46456	FBgn0015614	CanB2	Human	63928	24927	CHP2	2	1.91	low	No	No	eggNOG, OrthoDB
53	FBgn0015614	CanB2	FastLMM	0	0	0	0	0	0	1	FBGN0015614	CanB2	46456	FBgn0015614	CanB2	Human	11261	17433	CHP1	2	1.91	low	No	No	eggNOG, OrthoDB
57	FBgn0036277	CG10418	FastLMM	0	1	0	0	1	0	0	FBGN0036277	CG10418	39408	FBgn0036277	CG10418	Human	84967	17562	LSM10	2	1.91	low	No	No	eggNOG, OrthoDB
62	FBgn0031620	CG11929	FastLMM	0	0	1	0	0	0	0	FBGN0031620	CG11929	33668	FBgn0031620	CG11929	Human	132200	25190	C3orf49	1	0.93	low	Yes	Yes	Compara
63	FBgn0035285	CG12025	FastLMM	0	0	1	0	0	0	0	FBGN0035285	CG12025	38246	FBgn0035285	CG12025	Human	29058	15876	TMEM230	3	2.84	low	No	No	eggNOG, Phylome, RoundUp
84	FBgn0000633	fas	FastLMM	1	1	0	0	0	0	0	FBGN0000633	CG17716	36521	FBgn0000633	CG17716	Human	4059	6722	BCAM	1	1	low	Yes	Yes	OrthoFinder
90	FBgn0050156	CG30156	FastLMM	0	0	1	0	0	0	0	FBGN0050156	CG30156	246488	FBgn0050156	CG30156	Human	3300	5228	DNAJB2	2	1.83	low	No	No	Compara, eggNOG
90	FBgn0050156	CG30156	FastLMM	0	0	1	0	0	0	0	FBGN0050156	CG30156	246488	FBgn0050156	CG30156	Human	3337	5270	DNAJB1	2	1.83	low	No	No	Compara, eggNOG
90	FBgn0050156	CG30156	FastLMM	0	0	1	0	0	0	0	FBGN0050156	CG30156	246488	FBgn0050156	CG30156	Human	10049	14888	DNAJB6	2	1.83	low	No	No	Compara, eggNOG
90	FBgn0050156	CG30156	FastLMM	0	0	1	0	0	0	0	FBGN0050156	CG30156	246488	FBgn0050156	CG30156	Human	150353	24986	DNAJB7	2	1.83	low	No	No	Compara, eggNOG
90	FBgn0050156	CG30156	FastLMM	0	0	1	0	0	0	0	FBGN0050156	CG30156	246488	FBgn0050156	CG30156	Human	165721	23699	DNAJB8	2	1.83	low	No	No	Compara, eggNOG
90	FBgn0050156	CG30156	FastLMM	0	0	1	0	0	0	0	FBGN0050156	CG30156	246488	FBgn0050156	CG30156	Human	25822	14887	DNAJB5	2	1.83	low	No	No	Compara, eggNOG
90	FBgn0050156	CG30156	FastLMM	0	0	1	0	0	0	0	FBGN0050156	CG30156	246488	FBgn0050156	CG30156	Human	5611	9439	DNAJC3	2	1.81	low	No	No	eggNOG, Phylome
91	FBgn0031645	CG3036	FastLMM	0	0	1	0	0	0	0	FBGN0031645	CG3036	33695	FBgn0031645	CG3036	Human	10050	10932	SLC17A4	3	3	low	No	No	eggNOG, OrthoFinder, Panther
91	FBgn0031645	CG3036	FastLMM	0	0	1	0	0	0	0	FBGN0031645	CG3036	33695	FBgn0031645	CG3036	Human	6568	10929	SLC17A1	3	3	low	No	No	eggNOG, OrthoFinder, Panther
91	FBgn0031645	CG3036	FastLMM	0	0	1	0	0	0	0	FBGN0031645	CG3036	33695	FBgn0031645	CG3036	Human	57084	16703	SLC17A6	3	2.91	low	No	No	eggNOG, OrthoDB, OrthoFinder
91	FBgn0031645	CG3036	FastLMM	0	0	1	0	0	0	0	FBGN0031645	CG3036	33695	FBgn0031645	CG3036	Human	57030	16704	SLC17A7	3	2.91	low	No	No	eggNOG, OrthoDB, OrthoFinder
91	FBgn0031645	CG3036	FastLMM	0	0	1	0	0	0	0	FBGN0031645	CG3036	33695	FBgn0031645	CG3036	Human	246213	20151	SLC17A8	3	2.91	low	No	No	eggNOG, OrthoDB, OrthoFinder
91	FBgn0031645	CG3036	FastLMM	0	0	1	0	0	0	0	FBGN0031645	CG3036	33695	FBgn0031645	CG3036	Human	63910	16192	SLC17A9	2	1.9	low	No	No	eggNOG, OrthoFinder
92	FBgn0050377	CG30377	FastLMM	0	0	0	1	0	0	0	FBGN0050377	CG30377	50252	FBgn0050377	CG30377	Human	8099	14002	CDK2AP1	1	0.96	low	Yes	No	TreeFam
92	FBgn0050377	CG30377	FastLMM	0	0	0	1	0	0	0	FBGN0050377	CG30377	50252	FBgn0050377	CG30377	Human	10263	30833	CDK2AP2	1	0.96	low	Yes	No	TreeFam
96	FBgn0034568	CG3216	FastLMM	0	0	0	0	1	0	0	FBGN0034568	CG3216	37376	FBgn0034568	CG3216	Human	2984	4688	GUCY2C	3	3.01	low	No	No	eggNOG, OrthoDB, Panther
96	FBgn0034568	CG3216	FastLMM	0	0	0	0	1	0	0	FBGN0034568	CG3216	37376	FBgn0034568	CG3216	Human	2986	4691	GUCY2F	3	3.01	low	No	No	eggNOG, OrthoDB, Panther
96	FBgn0034568	CG3216	FastLMM	0	0	0	0	1	0	0	FBGN0034568	CG3216	37376	FBgn0034568	CG3216	Human	3000	4689	GUCY2D	2	2	low	No	No	eggNOG, Panther
96	FBgn0034568	CG3216	FastLMM	0	0	0	0	1	0	0	FBGN0034568	CG3216	37376	FBgn0034568	CG3216	Human	4883	7945	NPR3	2	1.85	low	No	No	eggNOG, Isobase
101	FBgn0053144	CG33144	FastLMM	1	1	0	0	0	0	0	FBGN0053144	CG33144	36131	FBgn0053144	CG33144	Human	54467	22215	ANKIB1	2	1.91	low	No	No	eggNOG, OrthoDB
101	FBgn0053144	CG33144	FastLMM	1	1	0	0	0	0	0	FBGN0053144	CG33144	36131	FBgn0053144	CG33144	Human	25820	689	ARIH1	2	1.91	low	No	No	eggNOG, OrthoDB
111	FBgn0259242	CG42340	FastLMM	0	0	1	0	0	0	0	FBGN0259242	CG42340	7354472	FBgn0259242	CG42340	Human	60598	13814	KCNK15	2	1.83	low	No	No	Compara, eggNOG
111	FBgn0259242	CG42340	FastLMM	0	0	1	0	0	0	0	FBGN0259242	CG42340	7354472	FBgn0259242	CG42340	Human	89822	14465	KCNK17	2	1.83	low	No	No	Compara, eggNOG
111	FBgn0259242	CG42340	FastLMM	0	0	1	0	0	0	0	FBGN0259242	CG42340	7354472	FBgn0259242	CG42340	Human	51305	6283	KCNK9	2	1.83	low	No	No	Compara, eggNOG
111	FBgn0259242	CG42340	FastLMM	0	0	1	0	0	0	0	FBGN0259242	CG42340	7354472	FBgn0259242	CG42340	Human	54207	6273	KCNK10	2	1.83	low	No	No	Compara, eggNOG
111	FBgn0259242	CG42340	FastLMM	0	0	1	0	0	0	0	FBGN0259242	CG42340	7354472	FBgn0259242	CG42340	Human	3775	6272	KCNK1	2	1.83	low	No	No	Compara, eggNOG
111	FBgn0259242	CG42340	FastLMM	0	0	1	0	0	0	0	FBGN0259242	CG42340	7354472	FBgn0259242	CG42340	Human	8645	6280	KCNK5	2	1.83	low	No	No	Compara, eggNOG
111	FBgn0259242	CG42340	FastLMM	0	0	1	0	0	0	0	FBGN0259242	CG42340	7354472	FBgn0259242	CG42340	Human	83795	14464	KCNK16	2	1.83	low	No	No	Compara, eggNOG
111	FBgn0259242	CG42340	FastLMM	0	0	1	0	0	0	0	FBGN0259242	CG42340	7354472	FBgn0259242	CG42340	Human	56660	6274	KCNK12	2	1.83	low	No	No	Compara, eggNOG
111	FBgn0259242	CG42340	FastLMM	0	0	1	0	0	0	0	FBGN0259242	CG42340	7354472	FBgn0259242	CG42340	Human	3776	6277	KCNK2	2	1.83	low	No	No	Compara, eggNOG
111	FBgn0259242	CG42340	FastLMM	0	0	1	0	0	0	0	FBGN0259242	CG42340	7354472	FBgn0259242	CG42340	Human	3777	6278	KCNK3	2	1.83	low	No	No	Compara, eggNOG
111	FBgn0259242	CG42340	FastLMM	0	0	1	0	0	0	0	FBGN0259242	CG42340	7354472	FBgn0259242	CG42340	Human	10089	6282	KCNK7	2	1.83	low	No	No	Compara, eggNOG
111	FBgn0259242	CG42340	FastLMM	0	0	1	0	0	0	0	FBGN0259242	CG42340	7354472	FBgn0259242	CG42340	Human	9424	6281	KCNK6	2	1.83	low	No	No	Compara, eggNOG
112	FBgn0259677	CG42346	FastLMM	0	1	0	0	1	0	0	FBGN0259677	CG42346	3355160	FBgn0259677	CG42346	Human	100130733	35155	LRRC70	1	1.1	low	Yes	No	Panther
112	FBgn0259677	CG42346	FastLMM	0	1	0	0	1	0	0	FBGN0259677	CG42346	3355160	FBgn0259677	CG42346	Human	3483	5468	IGFALS	1	1	low	Yes	No	OrthoInspector
112	FBgn0259677	CG42346	FastLMM	0	1	0	0	1	0	0	FBGN0259677	CG42346	3355160	FBgn0259677	CG42346	Human	114790	19184	STK11IP	1	0.95	low	Yes	No	Isobase
112	FBgn0259677	CG42346	FastLMM	0	1	0	0	1	0	0	FBGN0259677	CG42346	3355160	FBgn0259677	CG42346	Human	80131	26272	LRRC8E	1	0.91	low	Yes	Yes	Phylome
112	FBgn0259677	CG42346	FastLMM	0	1	0	0	1	0	0	FBGN0259677	CG42346	3355160	FBgn0259677	CG42346	Human	84230	25075	LRRC8C	1	0.91	low	Yes	Yes	Phylome
112	FBgn0259677	CG42346	FastLMM	0	1	0	0	1	0	0	FBGN0259677	CG42346	3355160	FBgn0259677	CG42346	Human	55144	16992	LRRC8D	1	0.91	low	Yes	Yes	Phylome
113	FBgn0260388	CG42514	FastLMM	0	0	0	0	0	0	1	FBGN0260388	CG42514	8674108	FBgn0260388	CG42514	Human	84641	23376	MFSD14B	2	1.91	low	No	No	eggNOG, OrthoDB
114	FBgn0261550	CG42668	FastLMM	0	0	0	1	0	0	0	FBGN0261550	CG42668	42412	FBgn0261550	CG42668	Human	114883	16386	OSBPL9	3	2.94	low	No	No	eggNOG, OrthoDB, RoundUp
125	FBgn0285963	sda	FastLMM	0	0	1	0	0	0	0	FBGN0285963	CG46339	44359	FBgn0285963	CG46339	Human	9520	7900	NPEPPS	3	3.01	low	No	No	eggNOG, OrthoDB, Panther
125	FBgn0285963	sda	FastLMM	0	0	1	0	0	0	0	FBGN0285963	CG46339	44359	FBgn0285963	CG46339	Human	29953	30748	TRHDE	3	2.84	low	No	No	Compara, eggNOG, OrthoDB
125	FBgn0285963	sda	FastLMM	0	0	1	0	0	0	0	FBGN0285963	CG46339	44359	FBgn0285963	CG46339	Human	206338	26904	LVRN	3	2.84	low	No	No	Compara, eggNOG, OrthoDB
125	FBgn0285963	sda	FastLMM	0	0	1	0	0	0	0	FBGN0285963	CG46339	44359	FBgn0285963	CG46339	Human	290	500	ANPEP	3	2.84	low	No	No	Compara, eggNOG, OrthoDB
125	FBgn0285963	sda	FastLMM	0	0	1	0	0	0	0	FBGN0285963	CG46339	44359	FBgn0285963	CG46339	Human	2028	3355	ENPEP	2	1.85	low	No	No	eggNOG, Isobase
126	FBgn0030778	CG4678	FastLMM	0	0	0	1	0	0	0	FBGN0030778	CG4678	32652	FBgn0030778	CG4678	Human	1362	2301	CPD	3	2.94	low	No	No	eggNOG, OrthoDB, RoundUp
126	FBgn0030778	CG4678	FastLMM	0	0	0	1	0	0	0	FBGN0030778	CG4678	32652	FBgn0030778	CG4678	Human	1369	2312	CPN1	2	1.93	low	No	No	eggNOG, RoundUp
127	FBgn0039355	CG4730	FastLMM	0	1	0	0	0	0	0	FBGN0039355	CG4730	43099	FBgn0039355	CG4730	Human	79177	28357	ZNF576	1	1.1	low	Yes	Yes	Panther
127	FBgn0039355	CG4730	FastLMM	0	1	0	0	0	0	0	FBGN0039355	CG4730	43099	FBgn0039355	CG4730	Human	7701	12927	ZNF142	1	1.1	low	Yes	Yes	Panther
127	FBgn0039355	CG4730	FastLMM	0	1	0	0	0	0	0	FBGN0039355	CG4730	43099	FBgn0039355	CG4730	Human	149076	18079	ZNF362	1	0.95	low	Yes	No	Isobase
131	FBgn0036186	CG6071	FastLMM	0	0	1	0	0	0	0	FBGN0036186	CG6071	39308	FBgn0036186	CG6071	Human	9520	7900	NPEPPS	3	3.01	low	No	No	eggNOG, OrthoDB, Panther
131	FBgn0036186	CG6071	FastLMM	0	0	1	0	0	0	0	FBGN0036186	CG6071	39308	FBgn0036186	CG6071	Human	29953	30748	TRHDE	3	2.84	low	No	No	Compara, eggNOG, OrthoDB
131	FBgn0036186	CG6071	FastLMM	0	0	1	0	0	0	0	FBGN0036186	CG6071	39308	FBgn0036186	CG6071	Human	206338	26904	LVRN	3	2.84	low	No	No	Compara, eggNOG, OrthoDB
131	FBgn0036186	CG6071	FastLMM	0	0	1	0	0	0	0	FBGN0036186	CG6071	39308	FBgn0036186	CG6071	Human	290	500	ANPEP	3	2.84	low	No	No	Compara, eggNOG, OrthoDB
137	FBgn0030991	CG7453	FastLMM	0	0	0	0	0	0	1	FBGN0030991	CG7453	32903	FBgn0030991	CG7453	Human	100287284	40023	MANSC4	1	1.1	low	Yes	Yes	Panther
137	FBgn0030991	CG7453	FastLMM	0	0	0	0	0	0	1	FBGN0030991	CG7453	32903	FBgn0030991	CG7453	Human	54682	25505	MANSC1	1	1.1	low	Yes	Yes	Panther
137	FBgn0030991	CG7453	FastLMM	0	0	0	0	0	0	1	FBGN0030991	CG7453	32903	FBgn0030991	CG7453	Human	53838	1174	C11orf24	1	1.1	low	Yes	Yes	Panther
140	FBgn0036929	CG7668	FastLMM	0	0	0	0	0	1	0	FBGN0036929	CG7668	40190	FBgn0036929	CG7668	Human	10218	24078	ANGPTL7	2	2	low	No	No	eggNOG, Panther
140	FBgn0036929	CG7668	FastLMM	0	0	0	0	0	1	0	FBGN0036929	CG7668	40190	FBgn0036929	CG7668	Human	10875	3696	FGL2	2	1.91	low	No	No	eggNOG, OMA
140	FBgn0036929	CG7668	FastLMM	0	0	0	0	0	1	0	FBGN0036929	CG7668	40190	FBgn0036929	CG7668	Human	8547	3625	FCN3	2	1.9	low	No	No	eggNOG, OrthoFinder
140	FBgn0036929	CG7668	FastLMM	0	0	0	0	0	1	0	FBGN0036929	CG7668	40190	FBgn0036929	CG7668	Human	4239	7035	MFAP4	2	1.9	low	No	No	eggNOG, OrthoFinder
140	FBgn0036929	CG7668	FastLMM	0	0	0	0	0	1	0	FBGN0036929	CG7668	40190	FBgn0036929	CG7668	Human	2267	3695	FGL1	2	1.9	low	No	No	eggNOG, OrthoFinder
141	FBgn0037552	CG7800	FastLMM	0	0	0	0	1	0	0	FBGN0037552	CG7800	40963	FBgn0037552	CG7800	Human	116844	29480	LRG1	1	1.1	low	Yes	Yes	Panther
141	FBgn0037552	CG7800	FastLMM	0	0	0	0	1	0	0	FBGN0037552	CG7800	40963	FBgn0037552	CG7800	Human	375387	24613	NRROS	1	1.1	low	Yes	No	Panther
141	FBgn0037552	CG7800	FastLMM	0	0	0	0	1	0	0	FBGN0037552	CG7800	40963	FBgn0037552	CG7800	Human	8036	15454	SHOC2	1	1	low	Yes	No	OrthoFinder
141	FBgn0037552	CG7800	FastLMM	0	0	0	0	1	0	0	FBGN0037552	CG7800	40963	FBgn0037552	CG7800	Human	255252	26719	LRRC57	1	1	low	Yes	No	OrthoFinder
143	FBgn0035252	CG7970	FastLMM	0	0	0	0	0	1	0	FBGN0035252	CG7970	38205	FBgn0035252	CG7970	Human	192111	28763	PGAM5	2	1.94	low	No	No	Compara, OMA
144	FBgn0037612	CG8112	FastLMM	0	1	0	0	1	0	0	FBGN0037612	CG8112	41033	FBgn0037612	CG8112	Human	8694	2843	DGAT1	3	2.94	low	No	No	eggNOG, OrthoDB, RoundUp
150	FBgn0028847	CG9014	FastLMM	0	0	0	0	0	1	0	FBGN0028847	CG9014	34777	FBgn0028847	CG9014	Human	7189	12036	TRAF6	2	1.91	low	No	No	eggNOG, OrthoDB
150	FBgn0028847	CG9014	FastLMM	0	0	0	0	0	1	0	FBGN0028847	CG9014	34777	FBgn0028847	CG9014	Human	7185	12031	TRAF1	2	1.91	low	No	No	eggNOG, OrthoDB
150	FBgn0028847	CG9014	FastLMM	0	0	0	0	0	1	0	FBGN0028847	CG9014	34777	FBgn0028847	CG9014	Human	7186	12032	TRAF2	2	1.91	low	No	No	eggNOG, OrthoDB
150	FBgn0028847	CG9014	FastLMM	0	0	0	0	0	1	0	FBGN0028847	CG9014	34777	FBgn0028847	CG9014	Human	7187	12033	TRAF3	2	1.91	low	No	No	eggNOG, OrthoDB
150	FBgn0028847	CG9014	FastLMM	0	0	0	0	0	1	0	FBGN0028847	CG9014	34777	FBgn0028847	CG9014	Human	9618	12034	TRAF4	2	1.91	low	No	No	eggNOG, OrthoDB
155	FBgn0030775	CG9673	FastLMM	0	0	0	1	0	0	0	FBGN0030775	CG9673	32649	FBgn0030775	CG9673	Human	11012	6359	KLK11	2	1.94	low	No	No	Compara, OrthoDB
155	FBgn0030775	CG9673	FastLMM	0	0	0	1	0	0	0	FBGN0030775	CG9673	32649	FBgn0030775	CG9673	Human	9622	6365	KLK4	2	1.94	low	No	No	Compara, OrthoDB
156	FBgn0034490	CG9864	FastLMM	0	0	1	0	0	0	0	FBGN0034490	CG9864	37287	FBgn0034490	CG9864	Human	10050	10932	SLC17A4	3	3	low	No	No	eggNOG, OrthoFinder, Panther
156	FBgn0034490	CG9864	FastLMM	0	0	1	0	0	0	0	FBGN0034490	CG9864	37287	FBgn0034490	CG9864	Human	6568	10929	SLC17A1	3	3	low	No	No	eggNOG, OrthoFinder, Panther
156	FBgn0034490	CG9864	FastLMM	0	0	1	0	0	0	0	FBGN0034490	CG9864	37287	FBgn0034490	CG9864	Human	26503	10933	SLC17A5	3	3	low	No	No	eggNOG, OrthoFinder, Panther
156	FBgn0034490	CG9864	FastLMM	0	0	1	0	0	0	0	FBGN0034490	CG9864	37287	FBgn0034490	CG9864	Human	57084	16703	SLC17A6	3	2.91	low	No	No	eggNOG, OrthoDB, OrthoFinder
156	FBgn0034490	CG9864	FastLMM	0	0	1	0	0	0	0	FBGN0034490	CG9864	37287	FBgn0034490	CG9864	Human	57030	16704	SLC17A7	3	2.91	low	No	No	eggNOG, OrthoDB, OrthoFinder
156	FBgn0034490	CG9864	FastLMM	0	0	1	0	0	0	0	FBGN0034490	CG9864	37287	FBgn0034490	CG9864	Human	246213	20151	SLC17A8	3	2.91	low	No	No	eggNOG, OrthoDB, OrthoFinder
156	FBgn0034490	CG9864	FastLMM	0	0	1	0	0	0	0	FBGN0034490	CG9864	37287	FBgn0034490	CG9864	Human	63910	16192	SLC17A9	2	1.9	low	No	No	eggNOG, OrthoFinder
160	FBgn0034582	Cht9	FastLMM	1	0	0	0	0	0	0	FBGN0034582	Cht9	37392	FBgn0034582	Cht9	Human	1486	2496	CTBS	2	1.91	low	No	No	eggNOG, OrthoDB
161	FBgn0262582	cic	FastLMM	0	0	0	1	0	0	0	FBGN0262582	cic	53560	FBgn0262582	cic	Human	56987	14422	BBX	2	1.91	low	No	No	eggNOG, OrthoDB
163	FBgn0259173	corn	FastLMM	0	0	0	0	0	0	1	FBGN0259173	corn	38786	FBgn0259173	corn	Human	10250	16638	SRRM1	1	0.95	low	Yes	No	Isobase
170	FBgn0025674	CycK	FastLMM	1	0	0	1	0	0	1	FBGN0025674	CycK	49816	FBgn0025674	CycK	Human	905	1600	CCNT2	2	1.91	low	No	No	eggNOG, OrthoDB
170	FBgn0025674	CycK	FastLMM	1	0	0	1	0	0	1	FBGN0025674	CycK	49816	FBgn0025674	CycK	Human	904	1599	CCNT1	2	1.91	low	No	No	eggNOG, OrthoDB
171	FBgn0035790	Cyp316a1	FastLMM	0	0	0	0	1	0	0	FBGN0035790	Cyp316a1	38840	FBgn0035790	Cyp316a1	Human	4051	2646	CYP4F3	2	1.91	low	No	No	eggNOG, OrthoDB
171	FBgn0035790	Cyp316a1	FastLMM	0	0	0	0	1	0	0	FBGN0035790	Cyp316a1	38840	FBgn0035790	Cyp316a1	Human	8529	2645	CYP4F2	2	1.91	low	No	No	eggNOG, OrthoDB
171	FBgn0035790	Cyp316a1	FastLMM	0	0	0	0	1	0	0	FBGN0035790	Cyp316a1	38840	FBgn0035790	Cyp316a1	Human	260293	20244	CYP4X1	2	1.91	low	No	No	eggNOG, OrthoDB
171	FBgn0035790	Cyp316a1	FastLMM	0	0	0	0	1	0	0	FBGN0035790	Cyp316a1	38840	FBgn0035790	Cyp316a1	Human	57834	13265	CYP4F11	2	1.91	low	No	No	eggNOG, OrthoDB
171	FBgn0035790	Cyp316a1	FastLMM	0	0	0	0	1	0	0	FBGN0035790	Cyp316a1	38840	FBgn0035790	Cyp316a1	Human	11283	2648	CYP4F8	2	1.91	low	No	No	eggNOG, OrthoDB
171	FBgn0035790	Cyp316a1	FastLMM	0	0	0	0	1	0	0	FBGN0035790	Cyp316a1	38840	FBgn0035790	Cyp316a1	Human	126410	26820	CYP4F22	2	1.91	low	No	No	eggNOG, OrthoDB
171	FBgn0035790	Cyp316a1	FastLMM	0	0	0	0	1	0	0	FBGN0035790	Cyp316a1	38840	FBgn0035790	Cyp316a1	Human	66002	18857	CYP4F12	2	1.91	low	No	No	eggNOG, OrthoDB
172	FBgn0038194	Cyp6d5	FastLMM	0	1	0	0	1	0	0	FBGN0038194	Cyp6d5	41706	FBgn0038194	Cyp6d5	Human	6916	11609	TBXAS1	3	2.82	low	No	No	eggNOG, OrthoDB, Phylome
173	FBgn0015926	dah	FastLMM	0	0	0	0	1	0	0	FBGN0015926	dah	32459	FBgn0015926	dah	Human	1821	3032	DRP2	2	2	low	No	No	eggNOG, Panther
176	FBgn0051646	CG31646	FastLMM	0	0	0	0	0	0	1	FBGN0051646	DIP-theta	33795	FBgn0051646	DIP-theta	Human	4685	7657	NCAM2	2	2	low	No	No	eggNOG, Panther
176	FBgn0051646	CG31646	FastLMM	0	0	0	0	0	0	1	FBGN0051646	DIP-theta	33795	FBgn0051646	DIP-theta	Human	4684	7656	NCAM1	2	2	low	No	No	eggNOG, Panther
176	FBgn0051646	CG31646	FastLMM	0	0	0	0	0	0	1	FBGN0051646	DIP-theta	33795	FBgn0051646	DIP-theta	Human	22997	32326	IGSF9B	2	2	low	No	No	eggNOG, Panther
177	FBgn0085414	dpr12	FastLMM	0	0	0	0	0	0	1	FBGN0085414	dpr12	50320	FBgn0085414	dpr12	Human	1826	3039	DSCAM	1	0.9	low	Yes	No	eggNOG
177	FBgn0085414	dpr12	FastLMM	0	0	0	0	0	0	1	FBGN0085414	dpr12	50320	FBgn0085414	dpr12	Human	54549	19308	SDK2	1	0.9	low	Yes	No	eggNOG
177	FBgn0085414	dpr12	FastLMM	0	0	0	0	0	0	1	FBGN0085414	dpr12	50320	FBgn0085414	dpr12	Human	402665	34550	IGLON5	1	0.9	low	Yes	No	eggNOG
177	FBgn0085414	dpr12	FastLMM	0	0	0	0	0	0	1	FBGN0085414	dpr12	50320	FBgn0085414	dpr12	Human	84063	18816	KIRREL2	1	0.9	low	Yes	No	eggNOG
177	FBgn0085414	dpr12	FastLMM	0	0	0	0	0	0	1	FBGN0085414	dpr12	50320	FBgn0085414	dpr12	Human	7399	12601	USH2A	1	0.9	low	Yes	Yes	eggNOG
177	FBgn0085414	dpr12	FastLMM	0	0	0	0	0	0	1	FBGN0085414	dpr12	50320	FBgn0085414	dpr12	Human	221935	19307	SDK1	1	0.9	low	Yes	No	eggNOG
177	FBgn0085414	dpr12	FastLMM	0	0	0	0	0	0	1	FBGN0085414	dpr12	50320	FBgn0085414	dpr12	Human	345193	24783	LRIT3	1	0.9	low	Yes	Yes	eggNOG
177	FBgn0085414	dpr12	FastLMM	0	0	0	0	0	0	1	FBGN0085414	dpr12	50320	FBgn0085414	dpr12	Human	257194	17302	NEGR1	1	0.9	low	Yes	No	eggNOG
177	FBgn0085414	dpr12	FastLMM	0	0	0	0	0	0	1	FBGN0085414	dpr12	50320	FBgn0085414	dpr12	Human	89932	19262	PAPLN	1	0.9	low	Yes	No	eggNOG
177	FBgn0085414	dpr12	FastLMM	0	0	0	0	0	0	1	FBGN0085414	dpr12	50320	FBgn0085414	dpr12	Human	57549	18132	IGSF9	1	0.9	low	Yes	No	eggNOG
177	FBgn0085414	dpr12	FastLMM	0	0	0	0	0	0	1	FBGN0085414	dpr12	50320	FBgn0085414	dpr12	Human	374462	9679	PTPRQ	1	0.9	low	Yes	No	eggNOG
177	FBgn0085414	dpr12	FastLMM	0	0	0	0	0	0	1	FBGN0085414	dpr12	50320	FBgn0085414	dpr12	Human	4978	8143	OPCML	1	0.9	low	Yes	No	eggNOG
177	FBgn0085414	dpr12	FastLMM	0	0	0	0	0	0	1	FBGN0085414	dpr12	50320	FBgn0085414	dpr12	Human	4685	7657	NCAM2	1	0.9	low	Yes	No	eggNOG
177	FBgn0085414	dpr12	FastLMM	0	0	0	0	0	0	1	FBGN0085414	dpr12	50320	FBgn0085414	dpr12	Human	26103	23404	LRIT1	1	0.9	low	Yes	Yes	eggNOG
177	FBgn0085414	dpr12	FastLMM	0	0	0	0	0	0	1	FBGN0085414	dpr12	50320	FBgn0085414	dpr12	Human	4684	7656	NCAM1	1	0.9	low	Yes	No	eggNOG
177	FBgn0085414	dpr12	FastLMM	0	0	0	0	0	0	1	FBGN0085414	dpr12	50320	FBgn0085414	dpr12	Human	22997	32326	IGSF9B	1	0.9	low	Yes	No	eggNOG
177	FBgn0085414	dpr12	FastLMM	0	0	0	0	0	0	1	FBGN0085414	dpr12	50320	FBgn0085414	dpr12	Human	57453	14656	DSCAML1	1	0.9	low	Yes	No	eggNOG
177	FBgn0085414	dpr12	FastLMM	0	0	0	0	0	0	1	FBGN0085414	dpr12	50320	FBgn0085414	dpr12	Human	4045	6705	LSAMP	1	0.9	low	Yes	No	eggNOG
177	FBgn0085414	dpr12	FastLMM	0	0	0	0	0	0	1	FBGN0085414	dpr12	50320	FBgn0085414	dpr12	Human	84623	23204	KIRREL3	1	0.9	low	Yes	No	eggNOG
177	FBgn0085414	dpr12	FastLMM	0	0	0	0	0	0	1	FBGN0085414	dpr12	50320	FBgn0085414	dpr12	Human	50863	17941	NTM	1	0.9	low	Yes	No	eggNOG
177	FBgn0085414	dpr12	FastLMM	0	0	0	0	0	0	1	FBGN0085414	dpr12	50320	FBgn0085414	dpr12	Human	55243	15734	KIRREL1	1	0.9	low	Yes	No	eggNOG
178	FBgn0053196	dp	FastLMM	0	0	0	0	0	1	0	FBGN0053196	dpy	318824	FBgn0053196	dpy	Human	84467	18794	FBN3	3	2.91	low	No	No	eggNOG, OrthoDB, OrthoInspector
178	FBgn0053196	dp	FastLMM	0	0	0	0	0	1	0	FBGN0053196	dpy	318824	FBgn0053196	dpy	Human	4054	6716	LTBP3	2	2.01	low	No	No	OrthoDB, OrthoInspector
178	FBgn0053196	dp	FastLMM	0	0	0	0	0	1	0	FBGN0053196	dpy	318824	FBgn0053196	dpy	Human	8785	6910	MATN4	2	1.91	low	No	No	eggNOG, OrthoDB
178	FBgn0053196	dp	FastLMM	0	0	0	0	0	1	0	FBGN0053196	dpy	318824	FBgn0053196	dpy	Human	4147	6908	MATN2	2	1.91	low	No	No	eggNOG, OrthoDB
178	FBgn0053196	dp	FastLMM	0	0	0	0	0	1	0	FBGN0053196	dpy	318824	FBgn0053196	dpy	Human	727897	7516	MUC5B	2	1.91	low	No	No	OMA, orthoMCL
180	FBgn0028407	Drep-3	FastLMM	0	0	0	0	0	1	0	FBGN0028407	Drep3	36292	FBgn0028407	Drep3	Human	1676	2772	DFFA	3	2.85	low	No	No	Compara, OrthoDB, Phylome
182	FBgn0016930	smi35A	FastLMM	0	0	0	0	0	0	1	FBGN0016930	Dyrk2	34831	FBgn0016930	Dyrk2	Human	1859	3091	DYRK1A	3	2.94	low	No	No	eggNOG, OMA, RoundUp
182	FBgn0016930	smi35A	FastLMM	0	0	0	0	0	0	1	FBGN0016930	Dyrk2	34831	FBgn0016930	Dyrk2	Human	9149	3092	DYRK1B	2	1.93	low	No	No	eggNOG, RoundUp
182	FBgn0016930	smi35A	FastLMM	0	0	0	0	0	0	1	FBGN0016930	Dyrk2	34831	FBgn0016930	Dyrk2	Human	28996	14402	HIPK2	2	1.93	low	No	No	eggNOG, RoundUp
182	FBgn0016930	smi35A	FastLMM	0	0	0	0	0	0	1	FBGN0016930	Dyrk2	34831	FBgn0016930	Dyrk2	Human	204851	19006	HIPK1	2	1.93	low	No	No	eggNOG, RoundUp
182	FBgn0016930	smi35A	FastLMM	0	0	0	0	0	0	1	FBGN0016930	Dyrk2	34831	FBgn0016930	Dyrk2	Human	10114	4915	HIPK3	2	1.93	low	No	No	eggNOG, RoundUp
186	FBgn0000536	eas	FastLMM	0	0	0	1	0	0	0	FBGN0000536	eas	32585	FBgn0000536	eas	Human	1119	1937	CHKA	3	2.85	low	No	No	eggNOG, Isobase, OrthoFinder
186	FBgn0000536	eas	FastLMM	0	0	0	1	0	0	0	FBGN0000536	eas	32585	FBgn0000536	eas	Human	1120	1938	CHKB	2	1.9	low	No	No	eggNOG, OrthoFinder
189	FBgn0026259	eIF5B	FastLMM	0	1	0	0	0	0	0	FBGN0026259	eIF5B	44261	FBgn0026259	eIF5B	Human	4528	7441	MTIF2	2	1.91	low	No	No	eggNOG, OrthoDB
190	FBgn0013953	Esp	FastLMM	0	0	0	0	0	1	0	FBGN0013953	Esp	42962	FBgn0013953	Esp	Human	65010	14472	SLC26A6	3	2.83	low	No	No	eggNOG, orthoMCL, RoundUp
190	FBgn0013953	Esp	FastLMM	0	0	0	0	0	1	0	FBGN0013953	Esp	42962	FBgn0013953	Esp	Human	375611	9359	SLC26A5	3	2.83	low	No	No	eggNOG, orthoMCL, RoundUp
190	FBgn0013953	Esp	FastLMM	0	0	0	0	0	1	0	FBGN0013953	Esp	42962	FBgn0013953	Esp	Human	5172	8818	SLC26A4	2	1.93	low	No	No	eggNOG, RoundUp
190	FBgn0013953	Esp	FastLMM	0	0	0	0	0	1	0	FBGN0013953	Esp	42962	FBgn0013953	Esp	Human	116369	14468	SLC26A8	2	1.91	low	No	No	eggNOG, OrthoDB
190	FBgn0013953	Esp	FastLMM	0	0	0	0	0	1	0	FBGN0013953	Esp	42962	FBgn0013953	Esp	Human	115019	14469	SLC26A9	2	1.85	low	No	No	eggNOG, Isobase
193	FBgn0000719	fog	FastLMM	0	1	0	0	1	0	0	FBGN0000719	fog	33148	FBgn0000719	fog	Human	55707	25528	NECAP2	1	0.96	low	Yes	No	TreeFam
194	FBgn0031815	frj	FastLMM	0	1	0	0	0	0	0	FBGN0031815	frj	33900	FBgn0031815	frj	Human	154141	21579	MBOAT1	2	1.91	low	No	No	eggNOG, OrthoDB
194	FBgn0031815	frj	FastLMM	0	1	0	0	0	0	0	FBGN0031815	frj	33900	FBgn0031815	frj	Human	10162	30244	LPCAT3	2	1.91	low	No	No	eggNOG, OrthoDB
194	FBgn0031815	frj	FastLMM	0	1	0	0	0	0	0	FBGN0031815	frj	33900	FBgn0031815	frj	Human	129642	25193	MBOAT2	2	1.91	low	No	No	eggNOG, OrthoDB
194	FBgn0031815	frj	FastLMM	0	1	0	0	0	0	0	FBGN0031815	frj	33900	FBgn0031815	frj	Human	619373	32311	MBOAT4	2	1.91	low	No	No	eggNOG, OrthoDB
195	FBgn0004652	fru	FastLMM	0	0	0	0	0	1	0	FBGN0004652	fru	42226	FBgn0004652	fru	Human	84878	23715	ZBTB45	1	1.05	low	Yes	Yes	Inparanoid
195	FBgn0004652	fru	FastLMM	0	0	0	0	0	1	0	FBGN0004652	fru	42226	FBgn0004652	fru	Human	22890	20259	ZBTB1	1	1.01	low	Yes	Yes	OMA
195	FBgn0004652	fru	FastLMM	0	0	0	0	0	1	0	FBGN0004652	fru	42226	FBgn0004652	fru	Human	85406	24581	DNAJC14	1	1	low	Yes	No	Hieranoid
195	FBgn0004652	fru	FastLMM	0	0	0	0	0	1	0	FBGN0004652	fru	42226	FBgn0004652	fru	Human	643376	37214	BTBD18	1	1	low	Yes	No	OrthoFinder
195	FBgn0004652	fru	FastLMM	0	0	0	0	0	1	0	FBGN0004652	fru	42226	FBgn0004652	fru	Human	9880	29014	ZBTB39	1	0.95	low	Yes	Yes	Isobase
195	FBgn0004652	fru	FastLMM	0	0	0	0	0	1	0	FBGN0004652	fru	42226	FBgn0004652	fru	Human	9841	21143	ZBTB24	1	0.91	low	Yes	No	Phylome
198	FBgn0004509	Fur1	FastLMM	0	0	1	0	0	0	0	FBGN0004509	Fur1	47220	FBgn0004509	Fur1	Human	5125	8747	PCSK5	3	3	low	No	No	eggNOG, OrthoFinder, Panther
198	FBgn0004509	Fur1	FastLMM	0	0	1	0	0	0	0	FBGN0004509	Fur1	47220	FBgn0004509	Fur1	Human	5126	8744	PCSK2	3	2.93	low	No	No	eggNOG, OrthoFinder, RoundUp
200	FBgn0004623	Gbeta76C	FastLMM	0	0	0	0	0	1	0	FBGN0004623	Gbeta76C	40148	FBgn0004623	Gbeta76C	Human	2783	4398	GNB2	3	3	low	No	No	eggNOG, OrthoFinder, Panther
200	FBgn0004623	Gbeta76C	FastLMM	0	0	0	0	0	1	0	FBGN0004623	Gbeta76C	40148	FBgn0004623	Gbeta76C	Human	10681	4401	GNB5	3	2.91	low	No	No	eggNOG, OrthoDB, OrthoFinder
204	FBgn0264000	GluRIB	FastLMM	0	0	0	0	0	1	0	FBGN0264000	GluRIB	44484	FBgn0264000	GluRIB	Human	2898	4580	GRIK2	2	1.83	low	No	No	Compara, eggNOG
204	FBgn0264000	GluRIB	FastLMM	0	0	0	0	0	1	0	FBGN0264000	GluRIB	44484	FBgn0264000	GluRIB	Human	2894	4575	GRID1	2	1.83	low	No	No	Compara, eggNOG
204	FBgn0264000	GluRIB	FastLMM	0	0	0	0	0	1	0	FBGN0264000	GluRIB	44484	FBgn0264000	GluRIB	Human	116443	16767	GRIN3A	2	1.83	low	No	No	Compara, eggNOG
204	FBgn0264000	GluRIB	FastLMM	0	0	0	0	0	1	0	FBGN0264000	GluRIB	44484	FBgn0264000	GluRIB	Human	2897	4579	GRIK1	2	1.83	low	No	No	Compara, eggNOG
204	FBgn0264000	GluRIB	FastLMM	0	0	0	0	0	1	0	FBGN0264000	GluRIB	44484	FBgn0264000	GluRIB	Human	2904	4586	GRIN2B	2	1.83	low	No	No	Compara, eggNOG
204	FBgn0264000	GluRIB	FastLMM	0	0	0	0	0	1	0	FBGN0264000	GluRIB	44484	FBgn0264000	GluRIB	Human	2900	4582	GRIK4	2	1.83	low	No	No	Compara, eggNOG
204	FBgn0264000	GluRIB	FastLMM	0	0	0	0	0	1	0	FBGN0264000	GluRIB	44484	FBgn0264000	GluRIB	Human	2905	4587	GRIN2C	2	1.83	low	No	No	Compara, eggNOG
204	FBgn0264000	GluRIB	FastLMM	0	0	0	0	0	1	0	FBGN0264000	GluRIB	44484	FBgn0264000	GluRIB	Human	2899	4581	GRIK3	2	1.83	low	No	No	Compara, eggNOG
204	FBgn0264000	GluRIB	FastLMM	0	0	0	0	0	1	0	FBGN0264000	GluRIB	44484	FBgn0264000	GluRIB	Human	2901	4583	GRIK5	2	1.83	low	No	No	Compara, eggNOG
205	FBgn0046113	GluRIIC	FastLMM	0	0	0	0	1	0	0	FBGN0046113	GluRIIC	33275	FBgn0046113	GluRIIC	Human	2894	4575	GRID1	3	2.93	low	No	No	Compara, eggNOG, Panther
205	FBgn0046113	GluRIIC	FastLMM	0	0	0	0	1	0	0	FBGN0046113	GluRIIC	33275	FBgn0046113	GluRIIC	Human	2901	4583	GRIK5	3	2.93	low	No	No	Compara, eggNOG, Panther
205	FBgn0046113	GluRIIC	FastLMM	0	0	0	0	1	0	0	FBGN0046113	GluRIIC	33275	FBgn0046113	GluRIIC	Human	116443	16767	GRIN3A	2	1.83	low	No	No	Compara, eggNOG
205	FBgn0046113	GluRIIC	FastLMM	0	0	0	0	1	0	0	FBGN0046113	GluRIIC	33275	FBgn0046113	GluRIIC	Human	2891	4572	GRIA2	2	1.83	low	No	No	Compara, eggNOG
205	FBgn0046113	GluRIIC	FastLMM	0	0	0	0	1	0	0	FBGN0046113	GluRIIC	33275	FBgn0046113	GluRIIC	Human	2892	4573	GRIA3	2	1.83	low	No	No	Compara, eggNOG
205	FBgn0046113	GluRIIC	FastLMM	0	0	0	0	1	0	0	FBGN0046113	GluRIIC	33275	FBgn0046113	GluRIIC	Human	2893	4574	GRIA4	2	1.83	low	No	No	Compara, eggNOG
205	FBgn0046113	GluRIIC	FastLMM	0	0	0	0	1	0	0	FBGN0046113	GluRIIC	33275	FBgn0046113	GluRIIC	Human	2904	4586	GRIN2B	2	1.83	low	No	No	Compara, eggNOG
205	FBgn0046113	GluRIIC	FastLMM	0	0	0	0	1	0	0	FBGN0046113	GluRIIC	33275	FBgn0046113	GluRIIC	Human	2890	4571	GRIA1	2	1.83	low	No	No	Compara, eggNOG
205	FBgn0046113	GluRIIC	FastLMM	0	0	0	0	1	0	0	FBGN0046113	GluRIIC	33275	FBgn0046113	GluRIIC	Human	2905	4587	GRIN2C	2	1.83	low	No	No	Compara, eggNOG
205	FBgn0046113	GluRIIC	FastLMM	0	0	0	0	1	0	0	FBGN0046113	GluRIIC	33275	FBgn0046113	GluRIIC	Human	2906	4588	GRIN2D	2	1.83	low	No	No	Compara, eggNOG
205	FBgn0046113	GluRIIC	FastLMM	0	0	0	0	1	0	0	FBGN0046113	GluRIIC	33275	FBgn0046113	GluRIIC	Human	2903	4585	GRIN2A	2	1.83	low	No	No	Compara, eggNOG
206	FBgn0264574	Glut1	FastLMM	0	0	1	0	0	0	0	FBGN0264574	Glut1	38109	FBgn0264574	Glut1	Human	56606	13446	SLC2A9	3	2.91	low	No	No	eggNOG, OrthoDB, OrthoFinder
206	FBgn0264574	Glut1	FastLMM	0	0	1	0	0	0	0	FBGN0264574	Glut1	38109	FBgn0264574	Glut1	Human	66035	14239	SLC2A11	3	2.91	low	No	No	eggNOG, OrthoDB, OrthoFinder
206	FBgn0264574	Glut1	FastLMM	0	0	1	0	0	0	0	FBGN0264574	Glut1	38109	FBgn0264574	Glut1	Human	155184	13445	SLC2A7	3	2.91	low	No	No	eggNOG, OrthoDB, OrthoFinder
208	FBgn0035142	hipk	FastLMM	0	0	0	0	0	0	1	FBGN0035142	Hipk	38070	FBgn0035142	Hipk	Human	9149	3092	DYRK1B	2	1.93	low	No	No	eggNOG, RoundUp
208	FBgn0035142	hipk	FastLMM	0	0	0	0	0	0	1	FBGN0035142	Hipk	38070	FBgn0035142	Hipk	Human	1859	3091	DYRK1A	2	1.93	low	No	No	eggNOG, RoundUp
208	FBgn0035142	hipk	FastLMM	0	0	0	0	0	0	1	FBGN0035142	Hipk	38070	FBgn0035142	Hipk	Human	8444	3094	DYRK3	2	1.93	low	No	No	eggNOG, RoundUp
208	FBgn0035142	hipk	FastLMM	0	0	0	0	0	0	1	FBGN0035142	Hipk	38070	FBgn0035142	Hipk	Human	8798	3095	DYRK4	2	1.93	low	No	No	eggNOG, RoundUp
208	FBgn0035142	hipk	FastLMM	0	0	0	0	0	0	1	FBGN0035142	Hipk	38070	FBgn0035142	Hipk	Human	8445	3093	DYRK2	2	1.93	low	No	No	eggNOG, RoundUp
209	FBgn0034012	Hr51	FastLMM	0	0	0	0	1	0	0	FBGN0034012	Hr51	36702	FBgn0034012	Hr51	Human	7101	7973	NR2E1	2	2.01	low	No	No	OrthoDB, OrthoFinder
210	FBgn0038922	CG6439	FastLMM	0	0	0	0	0	0	1	FBGN0038922	Idh3b	42586	FBgn0038922	Idh3b	Human	3419	5384	IDH3A	2	1.91	low	No	No	eggNOG, OrthoDB
211	FBgn0027086	Aats-ile	FastLMM	0	0	0	0	0	1	0	FBGN0027086	IleRS	45785	FBgn0027086	IleRS	Human	55699	29685	IARS2	3	2.81	low	No	No	eggNOG, OrthoDB, orthoMCL
212	FBgn0259683	Ir40a	FastLMM	0	0	0	0	1	0	0	FBGN0259683	Ir40a	35449	FBgn0259683	Ir40a	Human	2898	4580	GRIK2	1	0.93	low	Yes	No	Compara
212	FBgn0259683	Ir40a	FastLMM	0	0	0	0	1	0	0	FBGN0259683	Ir40a	35449	FBgn0259683	Ir40a	Human	2894	4575	GRID1	1	0.93	low	Yes	No	Compara
212	FBgn0259683	Ir40a	FastLMM	0	0	0	0	1	0	0	FBGN0259683	Ir40a	35449	FBgn0259683	Ir40a	Human	116443	16767	GRIN3A	1	0.93	low	Yes	No	Compara
212	FBgn0259683	Ir40a	FastLMM	0	0	0	0	1	0	0	FBGN0259683	Ir40a	35449	FBgn0259683	Ir40a	Human	2891	4572	GRIA2	1	0.93	low	Yes	No	Compara
212	FBgn0259683	Ir40a	FastLMM	0	0	0	0	1	0	0	FBGN0259683	Ir40a	35449	FBgn0259683	Ir40a	Human	2897	4579	GRIK1	1	0.93	low	Yes	No	Compara
212	FBgn0259683	Ir40a	FastLMM	0	0	0	0	1	0	0	FBGN0259683	Ir40a	35449	FBgn0259683	Ir40a	Human	2892	4573	GRIA3	1	0.93	low	Yes	No	Compara
212	FBgn0259683	Ir40a	FastLMM	0	0	0	0	1	0	0	FBGN0259683	Ir40a	35449	FBgn0259683	Ir40a	Human	2893	4574	GRIA4	1	0.93	low	Yes	No	Compara
212	FBgn0259683	Ir40a	FastLMM	0	0	0	0	1	0	0	FBGN0259683	Ir40a	35449	FBgn0259683	Ir40a	Human	2904	4586	GRIN2B	1	0.93	low	Yes	No	Compara
212	FBgn0259683	Ir40a	FastLMM	0	0	0	0	1	0	0	FBGN0259683	Ir40a	35449	FBgn0259683	Ir40a	Human	2890	4571	GRIA1	1	0.93	low	Yes	No	Compara
212	FBgn0259683	Ir40a	FastLMM	0	0	0	0	1	0	0	FBGN0259683	Ir40a	35449	FBgn0259683	Ir40a	Human	2900	4582	GRIK4	1	0.93	low	Yes	No	Compara
212	FBgn0259683	Ir40a	FastLMM	0	0	0	0	1	0	0	FBGN0259683	Ir40a	35449	FBgn0259683	Ir40a	Human	2905	4587	GRIN2C	1	0.93	low	Yes	No	Compara
212	FBgn0259683	Ir40a	FastLMM	0	0	0	0	1	0	0	FBGN0259683	Ir40a	35449	FBgn0259683	Ir40a	Human	2895	4576	GRID2	1	0.93	low	Yes	No	Compara
212	FBgn0259683	Ir40a	FastLMM	0	0	0	0	1	0	0	FBGN0259683	Ir40a	35449	FBgn0259683	Ir40a	Human	2899	4581	GRIK3	1	0.93	low	Yes	No	Compara
212	FBgn0259683	Ir40a	FastLMM	0	0	0	0	1	0	0	FBGN0259683	Ir40a	35449	FBgn0259683	Ir40a	Human	2906	4588	GRIN2D	1	0.93	low	Yes	No	Compara
212	FBgn0259683	Ir40a	FastLMM	0	0	0	0	1	0	0	FBGN0259683	Ir40a	35449	FBgn0259683	Ir40a	Human	2901	4583	GRIK5	1	0.93	low	Yes	No	Compara
212	FBgn0259683	Ir40a	FastLMM	0	0	0	0	1	0	0	FBGN0259683	Ir40a	35449	FBgn0259683	Ir40a	Human	2903	4585	GRIN2A	1	0.93	low	Yes	No	Compara
212	FBgn0259683	Ir40a	FastLMM	0	0	0	0	1	0	0	FBGN0259683	Ir40a	35449	FBgn0259683	Ir40a	Human	116444	16768	GRIN3B	1	0.93	low	Yes	No	Compara
212	FBgn0259683	Ir40a	FastLMM	0	0	0	0	1	0	0	FBGN0259683	Ir40a	35449	FBgn0259683	Ir40a	Human	8289	11110	ARID1A	1	0.9	low	Yes	No	eggNOG
212	FBgn0259683	Ir40a	FastLMM	0	0	0	0	1	0	0	FBGN0259683	Ir40a	35449	FBgn0259683	Ir40a	Human	57492	18040	ARID1B	1	0.9	low	Yes	No	eggNOG
221	FBgn0000464	Lar	FastLMM	0	0	0	0	0	0	1	FBGN0000464	Lar	35259	FBgn0000464	Lar	Human	5788	9666	PTPRC	2	2	low	No	No	eggNOG, Panther
236	FBgn0026206	mei-P26	FastLMM	0	0	1	0	0	0	0	FBGN0026206	mei-P26	45775	FBgn0026206	mei-P26	Human	80263	19018	TRIM45	3	3.11	low	No	No	OrthoDB, OrthoFinder, Panther
236	FBgn0026206	mei-P26	FastLMM	0	0	1	0	0	0	0	FBGN0026206	mei-P26	45775	FBgn0026206	mei-P26	Human	23321	15974	TRIM2	2	1.97	low	No	No	OrthoDB, TreeFam
236	FBgn0026206	mei-P26	FastLMM	0	0	1	0	0	0	0	FBGN0026206	mei-P26	45775	FBgn0026206	mei-P26	Human	10612	10064	TRIM3	2	1.97	low	No	No	OrthoDB, TreeFam
246	FBgn0014343	mirr	FastLMM	0	0	0	0	1	0	0	FBGN0014343	mirr	39441	FBgn0014343	mirr	Human	153572	14359	IRX2	3	2.96	low	No	No	eggNOG, Panther, TreeFam
247	FBgn0259481	Mob2	FastLMM	0	0	0	0	1	0	0	FBGN0259481	Mob2	39293	FBgn0259481	Mob2	Human	92597	29801	MOB1B	2	1.91	low	No	No	eggNOG, OrthoDB
247	FBgn0259481	Mob2	FastLMM	0	0	0	0	1	0	0	FBGN0259481	Mob2	39293	FBgn0259481	Mob2	Human	55233	16015	MOB1A	2	1.91	low	No	No	eggNOG, OrthoDB
247	FBgn0259481	Mob2	FastLMM	0	0	0	0	1	0	0	FBGN0259481	Mob2	39293	FBgn0259481	Mob2	Human	79817	23825	MOB3B	2	1.91	low	No	No	eggNOG, OrthoDB
247	FBgn0259481	Mob2	FastLMM	0	0	0	0	1	0	0	FBGN0259481	Mob2	39293	FBgn0259481	Mob2	Human	148932	29800	MOB3C	2	1.91	low	No	No	eggNOG, OrthoDB
250	FBgn0011666	msi	FastLMM	1	0	0	0	0	0	0	FBGN0011666	msi	43087	FBgn0011666	msi	Human	4440	7330	MSI1	3	2.8	low	No	No	eggNOG, OrthoFinder, orthoMCL
250	FBgn0011666	msi	FastLMM	1	0	0	0	0	0	0	FBGN0011666	msi	43087	FBgn0011666	msi	Human	3184	5036	HNRNPD	2	2.01	low	No	No	OrthoDB, OrthoFinder
250	FBgn0011666	msi	FastLMM	1	0	0	0	0	0	0	FBGN0011666	msi	43087	FBgn0011666	msi	Human	3182	5034	HNRNPAB	2	2.01	low	No	No	OrthoDB, OrthoFinder
250	FBgn0011666	msi	FastLMM	1	0	0	0	0	0	0	FBGN0011666	msi	43087	FBgn0011666	msi	Human	9987	5037	HNRNPDL	2	2.01	low	No	No	OrthoDB, OrthoFinder
259	FBgn0083963	CG34127	FastLMM	0	0	1	0	0	0	0	FBGN0083963	Nlg3	40912	FBgn0083963	Nlg3	Human	1066	1863	CES1	3	2.84	low	No	No	Compara, eggNOG, OrthoDB
259	FBgn0083963	CG34127	FastLMM	0	0	1	0	0	0	0	FBGN0083963	Nlg3	40912	FBgn0083963	Nlg3	Human	8824	1864	CES2	3	2.84	low	No	No	Compara, eggNOG, OrthoDB
259	FBgn0083963	CG34127	FastLMM	0	0	1	0	0	0	0	FBGN0083963	Nlg3	40912	FBgn0083963	Nlg3	Human	221223	26459	CES5A	3	2.84	low	No	No	Compara, eggNOG, OrthoDB
259	FBgn0083963	CG34127	FastLMM	0	0	1	0	0	0	0	FBGN0083963	Nlg3	40912	FBgn0083963	Nlg3	Human	23491	1865	CES3	3	2.84	low	No	No	Compara, eggNOG, OrthoDB
259	FBgn0083963	CG34127	FastLMM	0	0	1	0	0	0	0	FBGN0083963	Nlg3	40912	FBgn0083963	Nlg3	Human	283848	26741	CES4A	2	1.91	low	No	No	eggNOG, OrthoDB
259	FBgn0083963	CG34127	FastLMM	0	0	1	0	0	0	0	FBGN0083963	Nlg3	40912	FBgn0083963	Nlg3	Human	590	983	BCHE	2	1.91	low	No	No	eggNOG, OrthoDB
259	FBgn0083963	CG34127	FastLMM	0	0	1	0	0	0	0	FBGN0083963	Nlg3	40912	FBgn0083963	Nlg3	Human	7038	11764	TG	2	1.91	low	No	No	eggNOG, OrthoDB
259	FBgn0083963	CG34127	FastLMM	0	0	1	0	0	0	0	FBGN0083963	Nlg3	40912	FBgn0083963	Nlg3	Human	43	108	ACHE	2	1.91	low	No	No	eggNOG, OrthoDB
260	FBgn0083975	CG34139	FastLMM	0	0	0	1	0	0	0	FBGN0083975	Nlg4	42402	FBgn0083975	Nlg4	Human	1056	1848	CEL	3	3.01	low	No	No	eggNOG, OrthoDB, Panther
260	FBgn0083975	CG34139	FastLMM	0	0	0	1	0	0	0	FBGN0083975	Nlg4	42402	FBgn0083975	Nlg4	Human	283848	26741	CES4A	2	1.91	low	No	No	eggNOG, OrthoDB
260	FBgn0083975	CG34139	FastLMM	0	0	0	1	0	0	0	FBGN0083975	Nlg4	42402	FBgn0083975	Nlg4	Human	1066	1863	CES1	2	1.91	low	No	No	eggNOG, OrthoDB
260	FBgn0083975	CG34139	FastLMM	0	0	0	1	0	0	0	FBGN0083975	Nlg4	42402	FBgn0083975	Nlg4	Human	8824	1864	CES2	2	1.91	low	No	No	eggNOG, OrthoDB
260	FBgn0083975	CG34139	FastLMM	0	0	0	1	0	0	0	FBGN0083975	Nlg4	42402	FBgn0083975	Nlg4	Human	590	983	BCHE	2	1.91	low	No	No	eggNOG, OrthoDB
260	FBgn0083975	CG34139	FastLMM	0	0	0	1	0	0	0	FBGN0083975	Nlg4	42402	FBgn0083975	Nlg4	Human	221223	26459	CES5A	2	1.91	low	No	No	eggNOG, OrthoDB
260	FBgn0083975	CG34139	FastLMM	0	0	0	1	0	0	0	FBGN0083975	Nlg4	42402	FBgn0083975	Nlg4	Human	7038	11764	TG	2	1.91	low	No	No	eggNOG, OrthoDB
260	FBgn0083975	CG34139	FastLMM	0	0	0	1	0	0	0	FBGN0083975	Nlg4	42402	FBgn0083975	Nlg4	Human	43	108	ACHE	2	1.91	low	No	No	eggNOG, OrthoDB
260	FBgn0083975	CG34139	FastLMM	0	0	0	1	0	0	0	FBGN0083975	Nlg4	42402	FBgn0083975	Nlg4	Human	23491	1865	CES3	2	1.91	low	No	No	eggNOG, OrthoDB
261	FBgn0037617	CG8145	FastLMM	0	0	0	0	1	0	0	FBGN0037617	nom	41038	FBgn0037617	nom	Human	342909	13078	ZNF284	1	1.1	low	Yes	Yes	Panther
261	FBgn0037617	CG8145	FastLMM	0	0	0	0	1	0	0	FBGN0037617	nom	41038	FBgn0037617	nom	Human	333929	18411	SNAI3	1	1.1	low	Yes	No	Panther
261	FBgn0037617	CG8145	FastLMM	0	0	0	0	1	0	0	FBGN0037617	nom	41038	FBgn0037617	nom	Human	5324	9045	PLAG1	1	1.1	low	Yes	Yes	Panther
261	FBgn0037617	CG8145	FastLMM	0	0	0	0	1	0	0	FBGN0037617	nom	41038	FBgn0037617	nom	Human	2738	4320	GLI4	1	1.1	low	Yes	Yes	Panther
261	FBgn0037617	CG8145	FastLMM	0	0	0	0	1	0	0	FBGN0037617	nom	41038	FBgn0037617	nom	Human	23090	16762	ZNF423	1	1.1	low	Yes	No	Panther
261	FBgn0037617	CG8145	FastLMM	0	0	0	0	1	0	0	FBGN0037617	nom	41038	FBgn0037617	nom	Human	57623	19899	ZFAT	1	1.1	low	Yes	Yes	Panther
261	FBgn0037617	CG8145	FastLMM	0	0	0	0	1	0	0	FBGN0037617	nom	41038	FBgn0037617	nom	Human	6591	11094	SNAI2	1	1.1	low	Yes	No	Panther
261	FBgn0037617	CG8145	FastLMM	0	0	0	0	1	0	0	FBGN0037617	nom	41038	FBgn0037617	nom	Human	23528	13075	ZNF281	1	1.1	low	Yes	No	Panther
261	FBgn0037617	CG8145	FastLMM	0	0	0	0	1	0	0	FBGN0037617	nom	41038	FBgn0037617	nom	Human	7638	13014	ZNF221	1	1.1	low	Yes	Yes	Panther
261	FBgn0037617	CG8145	FastLMM	0	0	0	0	1	0	0	FBGN0037617	nom	41038	FBgn0037617	nom	Human	127665	18190	ZNF648	1	1.1	low	Yes	Yes	Panther
261	FBgn0037617	CG8145	FastLMM	0	0	0	0	1	0	0	FBGN0037617	nom	41038	FBgn0037617	nom	Human	9726	29004	ZNF646	1	1.1	low	Yes	Yes	Panther
261	FBgn0037617	CG8145	FastLMM	0	0	0	0	1	0	0	FBGN0037617	nom	41038	FBgn0037617	nom	Human	147808	33111	ZNF784	1	1.05	low	Yes	Yes	Inparanoid
261	FBgn0037617	CG8145	FastLMM	0	0	0	0	1	0	0	FBGN0037617	nom	41038	FBgn0037617	nom	Human	84905	15992	ZNF341	1	0.93	low	Yes	Yes	Compara
261	FBgn0037617	CG8145	FastLMM	0	0	0	0	1	0	0	FBGN0037617	nom	41038	FBgn0037617	nom	Human	7554	13154	ZNF8	1	0.91	low	Yes	No	Phylome
261	FBgn0037617	CG8145	FastLMM	0	0	0	0	1	0	0	FBGN0037617	nom	41038	FBgn0037617	nom	Human	147741	26484	ZNF560	1	0.91	low	Yes	No	Phylome
263	FBgn0085424	nub	FastLMM	0	0	1	0	0	0	0	FBGN0085424	nub	34669	FBgn0085424	nub	Human	5456	9217	POU3F4	3	2.93	low	No	No	Compara, eggNOG, Panther
263	FBgn0085424	nub	FastLMM	0	0	1	0	0	0	0	FBGN0085424	nub	34669	FBgn0085424	nub	Human	5453	9214	POU3F1	3	2.93	low	No	No	Compara, eggNOG, Panther
263	FBgn0085424	nub	FastLMM	0	0	1	0	0	0	0	FBGN0085424	nub	34669	FBgn0085424	nub	Human	5455	9216	POU3F3	3	2.93	low	No	No	Compara, eggNOG, Panther
263	FBgn0085424	nub	FastLMM	0	0	1	0	0	0	0	FBGN0085424	nub	34669	FBgn0085424	nub	Human	5454	9215	POU3F2	2	2	low	No	No	eggNOG, Panther
263	FBgn0085424	nub	FastLMM	0	0	1	0	0	0	0	FBGN0085424	nub	34669	FBgn0085424	nub	Human	5449	9210	POU1F1	2	2	low	No	No	eggNOG, Panther
263	FBgn0085424	nub	FastLMM	0	0	1	0	0	0	0	FBGN0085424	nub	34669	FBgn0085424	nub	Human	5463	9224	POU6F1	2	1.83	low	No	No	Compara, eggNOG
263	FBgn0085424	nub	FastLMM	0	0	1	0	0	0	0	FBGN0085424	nub	34669	FBgn0085424	nub	Human	5459	9220	POU4F3	2	1.83	low	No	No	Compara, eggNOG
267	FBgn0037153	olf413	FastLMM	0	0	0	0	0	1	0	FBGN0037153	olf413	40453	FBgn0037153	olf413	Human	1621	2689	DBH	2	1.91	low	No	No	eggNOG, OrthoDB
271	FBgn0260753	Pdfr	FastLMM	0	0	0	1	0	0	0	FBGN0260753	Pdfr	31234	FBgn0260753	Pdfr	Human	1395	2358	CRHR2	3	3.03	low	No	No	eggNOG, Panther, RoundUp
271	FBgn0260753	Pdfr	FastLMM	0	0	0	1	0	0	0	FBGN0260753	Pdfr	31234	FBgn0260753	Pdfr	Human	10203	16709	CALCRL	3	2.93	low	No	No	eggNOG, OrthoFinder, RoundUp
271	FBgn0260753	Pdfr	FastLMM	0	0	0	1	0	0	0	FBGN0260753	Pdfr	31234	FBgn0260753	Pdfr	Human	1394	2357	CRHR1	2	2	low	No	No	eggNOG, Panther
272	FBgn0033564	Pex6	FastLMM	1	0	0	0	0	0	0	FBGN0033564	Pex6	3772165	FBgn0033564	Pex6	Human	4931	8070	NVL	2	1.9	low	No	No	eggNOG, OrthoFinder
272	FBgn0033564	Pex6	FastLMM	1	0	0	0	0	0	0	FBGN0033564	Pex6	3772165	FBgn0033564	Pex6	Human	79029	28762	SPATA5L1	2	1.9	low	No	No	eggNOG, OrthoFinder
272	FBgn0033564	Pex6	FastLMM	1	0	0	0	0	0	0	FBGN0033564	Pex6	3772165	FBgn0033564	Pex6	Human	166378	18119	SPATA5	2	1.9	low	No	No	eggNOG, OrthoFinder
272	FBgn0033564	Pex6	FastLMM	1	0	0	0	0	0	0	FBGN0033564	Pex6	3772165	FBgn0033564	Pex6	Human	7415	12666	VCP	2	1.9	low	No	No	eggNOG, OrthoFinder
273	FBgn0050463	CG30463	FastLMM	0	0	1	0	0	0	0	FBGN0050463	CG30463	246627	FBgn0050463	Pgant9	Human	2589	4123	GALNT1	3	2.8	low	No	No	eggNOG, OrthoFinder, orthoMCL
273	FBgn0050463	CG30463	FastLMM	0	0	1	0	0	0	0	FBGN0050463	CG30463	246627	FBgn0050463	Pgant9	Human	57452	23233	GALNT16	2	1.83	low	No	No	Compara, eggNOG
273	FBgn0050463	CG30463	FastLMM	0	0	1	0	0	0	0	FBGN0050463	CG30463	246627	FBgn0050463	Pgant9	Human	168391	21725	GALNTL5	2	1.83	low	No	No	Compara, eggNOG
273	FBgn0050463	CG30463	FastLMM	0	0	1	0	0	0	0	FBGN0050463	CG30463	246627	FBgn0050463	Pgant9	Human	63917	19875	GALNT11	2	1.83	low	No	No	Compara, eggNOG
273	FBgn0050463	CG30463	FastLMM	0	0	1	0	0	0	0	FBGN0050463	CG30463	246627	FBgn0050463	Pgant9	Human	51809	4129	GALNT7	2	1.83	low	No	No	Compara, eggNOG
273	FBgn0050463	CG30463	FastLMM	0	0	1	0	0	0	0	FBGN0050463	CG30463	246627	FBgn0050463	Pgant9	Human	79623	22946	GALNT14	2	1.83	low	No	No	Compara, eggNOG
273	FBgn0050463	CG30463	FastLMM	0	0	1	0	0	0	0	FBGN0050463	CG30463	246627	FBgn0050463	Pgant9	Human	442117	33844	GALNTL6	2	1.83	low	No	No	Compara, eggNOG
273	FBgn0050463	CG30463	FastLMM	0	0	1	0	0	0	0	FBGN0050463	CG30463	246627	FBgn0050463	Pgant9	Human	55568	19873	GALNT10	2	1.83	low	No	No	Compara, eggNOG
275	FBgn0003089	pip	FastLMM	1	0	0	0	0	0	0	FBGN0003089	pip	40104	FBgn0003089	pip	Human	9653	5193	HS2ST1	2	1.85	low	No	No	eggNOG, Isobase
279	FBgn0032358	Ppt2	FastLMM	0	0	0	0	1	0	0	FBGN0032358	Ppt2	34564	FBgn0032358	Ppt2	Human	80864	13944	EGFL8	2	1.94	low	No	No	Compara, OMA
281	FBgn0003169	put	FastLMM	0	0	1	0	0	0	0	FBGN0003169	put	41772	FBgn0003169	put	Human	659	1078	BMPR2	2	1.83	low	No	No	Compara, eggNOG
286	FBgn0004244	Rdl	FastLMM	0	0	0	1	0	0	1	FBGN0004244	Rdl	39054	FBgn0004244	Rdl	Human	2561	4082	GABRB2	3	3.01	low	No	No	eggNOG, OrthoDB, Panther
286	FBgn0004244	Rdl	FastLMM	0	0	0	1	0	0	1	FBGN0004244	Rdl	39054	FBgn0004244	Rdl	Human	55879	14454	GABRQ	3	3.01	low	No	No	eggNOG, OrthoDB, Panther
286	FBgn0004244	Rdl	FastLMM	0	0	0	1	0	0	1	FBGN0004244	Rdl	39054	FBgn0004244	Rdl	Human	2562	4083	GABRB3	3	3.01	low	No	No	eggNOG, OrthoDB, Panther
286	FBgn0004244	Rdl	FastLMM	0	0	0	1	0	0	1	FBGN0004244	Rdl	39054	FBgn0004244	Rdl	Human	2560	4081	GABRB1	3	3.01	low	No	No	eggNOG, OrthoDB, Panther
286	FBgn0004244	Rdl	FastLMM	0	0	0	1	0	0	1	FBGN0004244	Rdl	39054	FBgn0004244	Rdl	Human	8001	4328	GLRA3	3	2.8	low	No	No	eggNOG, OrthoFinder, orthoMCL
286	FBgn0004244	Rdl	FastLMM	0	0	0	1	0	0	1	FBGN0004244	Rdl	39054	FBgn0004244	Rdl	Human	2742	4327	GLRA2	3	2.8	low	No	No	eggNOG, OrthoFinder, orthoMCL
286	FBgn0004244	Rdl	FastLMM	0	0	0	1	0	0	1	FBGN0004244	Rdl	39054	FBgn0004244	Rdl	Human	2741	4326	GLRA1	3	2.8	low	No	No	eggNOG, OrthoFinder, orthoMCL
291	FBgn0031118	RhoGAP19D	FastLMM	0	0	0	0	0	0	1	FBGN0031118	RhoGAP19D	33048	FBgn0031118	RhoGAP19D	Human	64333	14130	ARHGAP9	2	2.13	low	No	No	Panther, RoundUp
291	FBgn0031118	RhoGAP19D	FastLMM	0	0	0	0	0	0	1	FBGN0031118	RhoGAP19D	33048	FBgn0031118	RhoGAP19D	Human	201176	31813	ARHGAP27	2	2.13	low	No	No	Panther, RoundUp
292	FBgn0035574	Gef64C	FastLMM	0	1	0	0	0	0	0	FBGN0035574	RhoGEF64C	38578	FBgn0035574	RhoGEF64C	Human	27237	15515	ARHGEF16	2	1.93	low	No	No	eggNOG, RoundUp
292	FBgn0035574	Gef64C	FastLMM	0	1	0	0	0	0	0	FBGN0035574	RhoGEF64C	38578	FBgn0035574	RhoGEF64C	Human	9138	681	ARHGEF1	2	1.93	low	No	No	eggNOG, RoundUp
292	FBgn0035574	Gef64C	FastLMM	0	1	0	0	0	0	0	FBGN0035574	RhoGEF64C	38578	FBgn0035574	RhoGEF64C	Human	22899	15590	ARHGEF15	2	1.93	low	No	No	eggNOG, RoundUp
292	FBgn0035574	Gef64C	FastLMM	0	1	0	0	0	0	0	FBGN0035574	RhoGEF64C	38578	FBgn0035574	RhoGEF64C	Human	25791	7807	NGEF	2	1.93	low	No	No	eggNOG, RoundUp
292	FBgn0035574	Gef64C	FastLMM	0	1	0	0	0	0	0	FBGN0035574	RhoGEF64C	38578	FBgn0035574	RhoGEF64C	Human	23370	17090	ARHGEF18	2	1.85	low	No	No	eggNOG, Isobase
293	FBgn0003255	rk	FastLMM	0	0	0	1	0	0	0	FBGN0003255	rk	34819	FBgn0003255	rk	Human	3973	6585	LHCGR	2	1.9	low	No	No	eggNOG, OrthoFinder
293	FBgn0003255	rk	FastLMM	0	0	0	1	0	0	0	FBGN0003255	rk	34819	FBgn0003255	rk	Human	2492	3969	FSHR	2	1.9	low	No	No	eggNOG, OrthoFinder
293	FBgn0003255	rk	FastLMM	0	0	0	1	0	0	0	FBGN0003255	rk	34819	FBgn0003255	rk	Human	7253	12373	TSHR	2	1.9	low	No	No	eggNOG, OrthoFinder
299	FBgn0011260	Sema-2a	FastLMM	0	0	0	0	0	1	0	FBGN0011260	Sema2a	36846	FBgn0011260	Sema2a	Human	10501	10739	SEMA6B	3	2.93	low	No	No	Compara, eggNOG, Panther
299	FBgn0011260	Sema-2a	FastLMM	0	0	0	0	0	1	0	FBGN0011260	Sema2a	36846	FBgn0011260	Sema2a	Human	80031	16770	SEMA6D	3	2.93	low	No	No	Compara, eggNOG, Panther
299	FBgn0011260	Sema-2a	FastLMM	0	0	0	0	0	1	0	FBGN0011260	Sema2a	36846	FBgn0011260	Sema2a	Human	57556	10738	SEMA6A	3	2.93	low	No	No	Compara, eggNOG, Panther
299	FBgn0011260	Sema-2a	FastLMM	0	0	0	0	0	1	0	FBGN0011260	Sema2a	36846	FBgn0011260	Sema2a	Human	10500	10740	SEMA6C	3	2.93	low	No	No	Compara, eggNOG, Panther
299	FBgn0011260	Sema-2a	FastLMM	0	0	0	0	0	1	0	FBGN0011260	Sema2a	36846	FBgn0011260	Sema2a	Human	9037	10736	SEMA5A	3	2.86	low	No	No	Compara, eggNOG, RoundUp
299	FBgn0011260	Sema-2a	FastLMM	0	0	0	0	0	1	0	FBGN0011260	Sema2a	36846	FBgn0011260	Sema2a	Human	54437	10737	SEMA5B	3	2.86	low	No	No	Compara, eggNOG, RoundUp
302	FBgn0261698	CG42732	FastLMM	1	0	0	0	0	0	0	FBGN0261698	SLO2	5740325	FBgn0261698	SLO2	Human	157855	18867	KCNU1	2	1.94	low	No	No	Compara, OrthoDB
303	FBgn0085450	Snoo	FastLMM	0	1	1	0	0	0	0	FBGN0085450	Snoo	5740414	FBgn0085450	Snoo	Human	652991	32695	SKOR2	2	1.96	low	No	No	Inparanoid, Phylome
307	FBgn0036411	Sox21a	FastLMM	0	0	1	0	0	0	0	FBGN0036411	Sox21a	39567	FBgn0036411	Sox21a	Human	6656	11189	SOX1	3	3	low	No	No	eggNOG, OrthoFinder, Panther
307	FBgn0036411	Sox21a	FastLMM	0	0	1	0	0	0	0	FBGN0036411	Sox21a	39567	FBgn0036411	Sox21a	Human	6662	11204	SOX9	2	1.83	low	No	No	Compara, eggNOG
307	FBgn0036411	Sox21a	FastLMM	0	0	1	0	0	0	0	FBGN0036411	Sox21a	39567	FBgn0036411	Sox21a	Human	6663	11190	SOX10	2	1.83	low	No	No	Compara, eggNOG
307	FBgn0036411	Sox21a	FastLMM	0	0	1	0	0	0	0	FBGN0036411	Sox21a	39567	FBgn0036411	Sox21a	Human	9580	11192	SOX13	2	1.83	low	No	No	Compara, eggNOG
307	FBgn0036411	Sox21a	FastLMM	0	0	1	0	0	0	0	FBGN0036411	Sox21a	39567	FBgn0036411	Sox21a	Human	30812	11203	SOX8	2	1.83	low	No	No	Compara, eggNOG
307	FBgn0036411	Sox21a	FastLMM	0	0	1	0	0	0	0	FBGN0036411	Sox21a	39567	FBgn0036411	Sox21a	Human	6660	11201	SOX5	2	1.83	low	No	No	Compara, eggNOG
310	FBgn0265045	Strn-Mlck	FastLMM	0	0	0	0	1	0	0	FBGN0265045	Strn-Mlck	36753	FBgn0265045	Strn-Mlck	Human	83872	19194	HMCN1	2	1.81	low	No	No	eggNOG, Phylome
310	FBgn0265045	Strn-Mlck	FastLMM	0	0	0	0	1	0	0	FBGN0265045	Strn-Mlck	36753	FBgn0265045	Strn-Mlck	Human	256158	21293	HMCN2	2	1.81	low	No	No	eggNOG, Phylome
310	FBgn0265045	Strn-Mlck	FastLMM	0	0	0	0	1	0	0	FBGN0265045	Strn-Mlck	36753	FBgn0265045	Strn-Mlck	Human	84033	15719	OBSCN	2	1.81	low	No	No	eggNOG, Phylome
311	FBgn0026427	Su(var)2-HP2	FastLMM	0	1	0	0	0	0	0	FBGN0026427	Su(var)2-HP2	36621	FBgn0026427	Su(var)2-HP2	Human	10071	7510	MUC12	1	0.91	low	Yes	Yes	Phylome
311	FBgn0026427	Su(var)2-HP2	FastLMM	0	1	0	0	0	0	0	FBGN0026427	Su(var)2-HP2	36621	FBgn0026427	Su(var)2-HP2	Human	55183	23207	RIF1	1	0.91	low	Yes	No	Phylome
311	FBgn0026427	Su(var)2-HP2	FastLMM	0	1	0	0	0	0	0	FBGN0026427	Su(var)2-HP2	36621	FBgn0026427	Su(var)2-HP2	Human	135656	21666	MUCL3	1	0.9	low	Yes	Yes	eggNOG
311	FBgn0026427	Su(var)2-HP2	FastLMM	0	1	0	0	0	0	0	FBGN0026427	Su(var)2-HP2	36621	FBgn0026427	Su(var)2-HP2	Human	6101	10263	RP1	1	0.9	low	Yes	Yes	eggNOG
311	FBgn0026427	Su(var)2-HP2	FastLMM	0	1	0	0	0	0	0	FBGN0026427	Su(var)2-HP2	36621	FBgn0026427	Su(var)2-HP2	Human	123169	30401	LEO1	1	0.9	low	Yes	No	eggNOG
311	FBgn0026427	Su(var)2-HP2	FastLMM	0	1	0	0	0	0	0	FBGN0026427	Su(var)2-HP2	36621	FBgn0026427	Su(var)2-HP2	Human	1758	2932	DMP1	1	0.9	low	Yes	Yes	eggNOG
311	FBgn0026427	Su(var)2-HP2	FastLMM	0	1	0	0	0	0	0	FBGN0026427	Su(var)2-HP2	36621	FBgn0026427	Su(var)2-HP2	Human	3381	5341	IBSP	1	0.9	low	Yes	Yes	eggNOG
312	FBgn0261090	Sytbeta	FastLMM	0	0	1	0	0	0	0	FBGN0261090	Sytbeta	39630	FBgn0261090	Sytbeta	Human	91683	18381	SYT12	3	3.01	low	No	No	eggNOG, OrthoDB, Panther
312	FBgn0261090	Sytbeta	FastLMM	0	0	1	0	0	0	0	FBGN0261090	Sytbeta	39630	FBgn0261090	Sytbeta	Human	6857	11509	SYT1	3	2.91	low	No	No	eggNOG, OrthoDB, OrthoFinder
312	FBgn0261090	Sytbeta	FastLMM	0	0	1	0	0	0	0	FBGN0261090	Sytbeta	39630	FBgn0261090	Sytbeta	Human	9066	11514	SYT7	3	2.91	low	No	No	eggNOG, OrthoDB, OrthoFinder
312	FBgn0261090	Sytbeta	FastLMM	0	0	1	0	0	0	0	FBGN0261090	Sytbeta	39630	FBgn0261090	Sytbeta	Human	6861	11513	SYT5	3	2.91	low	No	No	eggNOG, OrthoDB, OrthoFinder
312	FBgn0261090	Sytbeta	FastLMM	0	0	1	0	0	0	0	FBGN0261090	Sytbeta	39630	FBgn0261090	Sytbeta	Human	6860	11512	SYT4	3	2.91	low	No	No	eggNOG, OrthoDB, OrthoFinder
312	FBgn0261090	Sytbeta	FastLMM	0	0	1	0	0	0	0	FBGN0261090	Sytbeta	39630	FBgn0261090	Sytbeta	Human	127833	11510	SYT2	3	2.91	low	No	No	eggNOG, OrthoDB, OrthoFinder
312	FBgn0261090	Sytbeta	FastLMM	0	0	1	0	0	0	0	FBGN0261090	Sytbeta	39630	FBgn0261090	Sytbeta	Human	23208	19239	SYT11	3	2.91	low	No	No	eggNOG, OrthoDB, OrthoFinder
312	FBgn0261090	Sytbeta	FastLMM	0	0	1	0	0	0	0	FBGN0261090	Sytbeta	39630	FBgn0261090	Sytbeta	Human	90019	19264	SYT8	3	2.91	low	No	No	eggNOG, OrthoDB, OrthoFinder
312	FBgn0261090	Sytbeta	FastLMM	0	0	1	0	0	0	0	FBGN0261090	Sytbeta	39630	FBgn0261090	Sytbeta	Human	51760	24119	SYT17	2	1.91	low	No	No	eggNOG, OrthoDB
316	FBgn0026160	tna	FastLMM	0	1	0	1	0	1	1	FBGN0026160	tna	39217	FBgn0026160	tna	Human	10401	16861	PIAS3	2	1.93	low	No	No	eggNOG, RoundUp
316	FBgn0026160	tna	FastLMM	0	1	0	1	0	1	1	FBGN0026160	tna	39217	FBgn0026160	tna	Human	51588	17002	PIAS4	2	1.93	low	No	No	eggNOG, RoundUp
316	FBgn0026160	tna	FastLMM	0	1	0	1	0	1	1	FBGN0026160	tna	39217	FBgn0026160	tna	Human	8554	2752	PIAS1	2	1.93	low	No	No	eggNOG, RoundUp
316	FBgn0026160	tna	FastLMM	0	1	0	1	0	1	1	FBGN0026160	tna	39217	FBgn0026160	tna	Human	9063	17311	PIAS2	2	1.93	low	No	No	eggNOG, RoundUp
318	FBgn0032586	Tpr2	FastLMM	0	1	0	0	0	0	0	FBGN0032586	Tpr2	34984	FBgn0032586	Tpr2	Human	5611	9439	DNAJC3	2	1.93	low	No	No	eggNOG, RoundUp
318	FBgn0032586	Tpr2	FastLMM	0	1	0	0	0	0	0	FBGN0032586	Tpr2	34984	FBgn0032586	Tpr2	Human	285126	24844	DNAJC5G	2	1.83	low	No	No	Compara, eggNOG
318	FBgn0032586	Tpr2	FastLMM	0	1	0	0	0	0	0	FBGN0032586	Tpr2	34984	FBgn0032586	Tpr2	Human	134218	27030	DNAJC21	2	1.83	low	No	No	Compara, eggNOG
319	FBgn0262139	trh	FastLMM	0	0	0	0	1	0	0	FBGN0262139	trh	38065	FBgn0262139	trh	Human	6493	10883	SIM2	3	2.86	low	No	No	Compara, eggNOG, RoundUp
319	FBgn0262139	trh	FastLMM	0	0	0	0	1	0	0	FBGN0262139	trh	38065	FBgn0262139	trh	Human	6492	10882	SIM1	3	2.86	low	No	No	Compara, eggNOG, RoundUp
319	FBgn0262139	trh	FastLMM	0	0	0	0	1	0	0	FBGN0262139	trh	38065	FBgn0262139	trh	Human	2034	3374	EPAS1	2	1.83	low	No	No	Compara, eggNOG
319	FBgn0262139	trh	FastLMM	0	0	0	0	1	0	0	FBGN0262139	trh	38065	FBgn0262139	trh	Human	3091	4910	HIF1A	2	1.83	low	No	No	Compara, eggNOG
319	FBgn0262139	trh	FastLMM	0	0	0	0	1	0	0	FBGN0262139	trh	38065	FBgn0262139	trh	Human	64344	15825	HIF3A	2	1.83	low	No	No	Compara, eggNOG
324	FBgn0003944	Ubx	FastLMM	0	0	1	0	0	0	0	FBGN0003944	Ubx	42034	FBgn0003944	Ubx	Human	3204	5108	HOXA7	2	2	low	No	No	eggNOG, Panther
324	FBgn0003944	Ubx	FastLMM	0	0	1	0	0	0	0	FBGN0003944	Ubx	42034	FBgn0003944	Ubx	Human	3217	5118	HOXB7	2	2	low	No	No	eggNOG, Panther
324	FBgn0003944	Ubx	FastLMM	0	0	1	0	0	0	0	FBGN0003944	Ubx	42034	FBgn0003944	Ubx	Human	3223	5128	HOXC6	2	2	low	No	No	eggNOG, Panther
324	FBgn0003944	Ubx	FastLMM	0	0	1	0	0	0	0	FBGN0003944	Ubx	42034	FBgn0003944	Ubx	Human	3215	5116	HOXB5	2	2	low	No	No	eggNOG, Panther
324	FBgn0003944	Ubx	FastLMM	0	0	1	0	0	0	0	FBGN0003944	Ubx	42034	FBgn0003944	Ubx	Human	3222	5127	HOXC5	2	2	low	No	No	eggNOG, Panther
324	FBgn0003944	Ubx	FastLMM	0	0	1	0	0	0	0	FBGN0003944	Ubx	42034	FBgn0003944	Ubx	Human	3202	5106	HOXA5	2	2	low	No	No	eggNOG, Panther
324	FBgn0003944	Ubx	FastLMM	0	0	1	0	0	0	0	FBGN0003944	Ubx	42034	FBgn0003944	Ubx	Human	3203	5107	HOXA6	2	2	low	No	No	eggNOG, Panther
325	FBgn0028476	CG15817	FastLMM	1	0	0	0	0	0	0	FBGN0028476	Usp1	43462	FBgn0028476	Usp1	Human	64854	20075	USP46	2	2	low	No	No	eggNOG, Panther
325	FBgn0028476	CG15817	FastLMM	1	0	0	0	0	0	0	FBGN0028476	Usp1	43462	FBgn0028476	Usp1	Human	219333	20485	USP12	2	2	low	No	No	eggNOG, Panther
326	FBgn0040068	vav	FastLMM	0	0	0	1	0	0	0	FBGN0040068	Vav	32920	FBgn0040068	Vav	Human	57480	20884	PLEKHG1	2	1.96	low	No	No	Compara, RoundUp
326	FBgn0040068	vav	FastLMM	0	0	0	1	0	0	0	FBGN0040068	Vav	32920	FBgn0040068	Vav	Human	64857	29515	PLEKHG2	2	1.96	low	No	No	Compara, RoundUp
326	FBgn0040068	vav	FastLMM	0	0	0	1	0	0	0	FBGN0040068	Vav	32920	FBgn0040068	Vav	Human	50649	684	ARHGEF4	2	1.96	low	No	No	Compara, RoundUp
330	FBgn0261862	whd	FastLMM	1	0	0	0	0	0	0	FBGN0261862	whd	36109	FBgn0261862	whd	Human	1120	1938	CHKB	2	1.94	low	No	No	Compara, OMA
332	FBgn0051860	CG31860	FastLMM	0	0	1	0	0	0	0	FBGN0051860	ZnT33D	326167	FBgn0051860	ZnT33D	Human	7782	11015	SLC30A4	3	3.01	low	No	No	eggNOG, OrthoDB, Panther
334	FBgn0033983	CG10253	FastEpistasis	0	1	0	0	0	0	0	FBGN0033983	ADPS	36669	FBgn0033983	ADPS	Human	197257	19708	LDHD	2	1.91	low	No	No	eggNOG, OrthoDB
342	FBgn0011300	babo	FastEpistasis	0	0	0	0	0	1	0	FBGN0011300	babo	35900	FBgn0011300	babo	Human	657	1076	BMPR1A	3	2.91	low	No	No	eggNOG, OrthoDB, OrthoFinder
342	FBgn0011300	babo	FastEpistasis	0	0	0	0	0	1	0	FBGN0011300	babo	35900	FBgn0011300	babo	Human	658	1077	BMPR1B	3	2.91	low	No	No	eggNOG, OrthoDB, OrthoFinder
343	FBgn0028645	beat-Ib	FastEpistasis	0	0	0	0	0	0	1	FBGN0028645	beat-Ib	34939	FBgn0028645	beat-Ib	Human	253559	29849	CADM2	1	0.91	low	Yes	Yes	Phylome
346	FBgn0031367	c-cup	FastEpistasis	0	0	1	0	0	0	0	FBGN0031367	c-cup	33360	FBgn0031367	c-cup	Human	10424	16089	PGRMC2	2	2	low	No	No	eggNOG, Panther
346	FBgn0031367	c-cup	FastEpistasis	0	0	1	0	0	0	0	FBGN0031367	c-cup	33360	FBgn0031367	c-cup	Human	10857	16090	PGRMC1	2	2	low	No	No	eggNOG, Panther
347	FBgn0034554	CG15227	FastEpistasis	0	1	0	0	0	0	0	FBGN0034554	CG15227	37359	FBgn0034554	CAH14	Human	766	1381	CA7	2	1.83	low	No	No	Compara, eggNOG
350	FBgn0028509	cenG1A	FastEpistasis	0	0	1	0	0	0	0	FBGN0028509	CenG1A	34803	FBgn0028509	CenG1A	Human	9744	16467	ACAP1	2	1.93	low	No	No	eggNOG, RoundUp
350	FBgn0028509	cenG1A	FastEpistasis	0	0	1	0	0	0	0	FBGN0028509	CenG1A	34803	FBgn0028509	CenG1A	Human	23527	16469	ACAP2	2	1.93	low	No	No	eggNOG, RoundUp
350	FBgn0028509	cenG1A	FastEpistasis	0	0	1	0	0	0	0	FBGN0028509	CenG1A	34803	FBgn0028509	CenG1A	Human	116983	16754	ACAP3	2	1.93	low	No	No	eggNOG, RoundUp
351	FBgn0031568	CG10019	FastEpistasis	0	1	0	0	0	0	0	FBGN0031568	CG10019	33600	FBgn0031568	CG10019	Human	6567	10923	SLC16A2	3	3.01	low	No	No	eggNOG, OrthoDB, Panther
351	FBgn0031568	CG10019	FastEpistasis	0	1	0	0	0	0	0	FBGN0031568	CG10019	33600	FBgn0031568	CG10019	Human	117247	17027	SLC16A10	3	3.01	low	No	No	eggNOG, OrthoDB, Panther
351	FBgn0031568	CG10019	FastEpistasis	0	1	0	0	0	0	0	FBGN0031568	CG10019	33600	FBgn0031568	CG10019	Human	387700	23094	SLC16A12	3	2.91	low	No	No	eggNOG, OrthoDB, OrthoFinder
351	FBgn0031568	CG10019	FastEpistasis	0	1	0	0	0	0	0	FBGN0031568	CG10019	33600	FBgn0031568	CG10019	Human	201232	31037	SLC16A13	3	2.91	low	No	No	eggNOG, OrthoDB, OrthoFinder
351	FBgn0031568	CG10019	FastEpistasis	0	1	0	0	0	0	0	FBGN0031568	CG10019	33600	FBgn0031568	CG10019	Human	9123	10924	SLC16A3	3	2.91	low	No	No	eggNOG, OrthoDB, OrthoFinder
351	FBgn0031568	CG10019	FastEpistasis	0	1	0	0	0	0	0	FBGN0031568	CG10019	33600	FBgn0031568	CG10019	Human	9194	10928	SLC16A7	3	2.91	low	No	No	eggNOG, OrthoDB, OrthoFinder
351	FBgn0031568	CG10019	FastEpistasis	0	1	0	0	0	0	0	FBGN0031568	CG10019	33600	FBgn0031568	CG10019	Human	6566	10922	SLC16A1	3	2.91	low	No	No	eggNOG, OrthoDB, OrthoFinder
351	FBgn0031568	CG10019	FastEpistasis	0	1	0	0	0	0	0	FBGN0031568	CG10019	33600	FBgn0031568	CG10019	Human	9121	10926	SLC16A5	3	2.91	low	No	No	eggNOG, OrthoDB, OrthoFinder
351	FBgn0031568	CG10019	FastEpistasis	0	1	0	0	0	0	0	FBGN0031568	CG10019	33600	FBgn0031568	CG10019	Human	23539	16270	SLC16A8	3	2.91	low	No	No	eggNOG, OrthoDB, OrthoFinder
351	FBgn0031568	CG10019	FastEpistasis	0	1	0	0	0	0	0	FBGN0031568	CG10019	33600	FBgn0031568	CG10019	Human	220963	23520	SLC16A9	3	2.87	low	No	No	eggNOG, OrthoDB, TreeFam
351	FBgn0031568	CG10019	FastEpistasis	0	1	0	0	0	0	0	FBGN0031568	CG10019	33600	FBgn0031568	CG10019	Human	162515	23093	SLC16A11	2	1.91	low	No	No	eggNOG, OrthoDB
351	FBgn0031568	CG10019	FastEpistasis	0	1	0	0	0	0	0	FBGN0031568	CG10019	33600	FBgn0031568	CG10019	Human	9122	10925	SLC16A4	2	1.91	low	No	No	eggNOG, OrthoDB
351	FBgn0031568	CG10019	FastEpistasis	0	1	0	0	0	0	0	FBGN0031568	CG10019	33600	FBgn0031568	CG10019	Human	9120	10927	SLC16A6	2	1.9	low	No	No	eggNOG, OrthoFinder
356	FBgn0031835	CG11319	FastEpistasis	1	0	0	0	0	0	0	FBGN0031835	CG11319	33923	FBgn0031835	CG11319	Human	1803	3009	DPP4	3	2.91	low	No	No	eggNOG, Panther, Phylome
365	FBgn0250847	CG14034	FastEpistasis	0	0	0	0	0	0	1	FBGN0250847	CG14034	33751	FBgn0250847	CG14034	Human	5408	9157	PNLIPRP2	2	2.1	low	No	No	OrthoFinder, Panther
374	FBgn0035003	CG15873	FastEpistasis	0	0	0	0	1	0	0	FBGN0035003	CG15873	37898	FBgn0035003	CG15873	Human	5655	6358	KLK10	1	0.91	low	Yes	No	Phylome
374	FBgn0035003	CG15873	FastEpistasis	0	0	0	0	1	0	0	FBGN0035003	CG15873	37898	FBgn0035003	CG15873	Human	566	913	AZU1	1	0.91	low	Yes	No	Phylome
374	FBgn0035003	CG15873	FastEpistasis	0	0	0	0	1	0	0	FBGN0035003	CG15873	37898	FBgn0035003	CG15873	Human	3003	4711	GZMK	1	0.91	low	Yes	Yes	Phylome
374	FBgn0035003	CG15873	FastEpistasis	0	0	0	0	1	0	0	FBGN0035003	CG15873	37898	FBgn0035003	CG15873	Human	203074	30824	PRSS55	1	0.91	low	Yes	No	Phylome
374	FBgn0035003	CG15873	FastEpistasis	0	0	0	0	1	0	0	FBGN0035003	CG15873	37898	FBgn0035003	CG15873	Human	1675	2771	CFD	1	0.91	low	Yes	Yes	Phylome
377	FBgn0032775	CG17544	FastEpistasis	0	0	0	0	1	0	0	FBGN0032775	CG17544	35213	FBgn0032775	CG17544	Human	55289	25621	ACOXL	3	2.81	low	No	No	eggNOG, OrthoDB, orthoMCL
382	FBgn0051121	CG31121	FastEpistasis	0	0	1	0	0	0	0	FBGN0051121	CG31121	42975	FBgn0051121	CG31121	Human	64240	13886	ABCG5	3	3.01	low	No	No	eggNOG, OrthoDB, Panther
382	FBgn0051121	CG31121	FastEpistasis	0	0	1	0	0	0	0	FBGN0051121	CG31121	42975	FBgn0051121	CG31121	Human	9429	74	ABCG2	3	2.84	low	No	No	Compara, eggNOG, OrthoDB
382	FBgn0051121	CG31121	FastEpistasis	0	0	1	0	0	0	0	FBGN0051121	CG31121	42975	FBgn0051121	CG31121	Human	9619	73	ABCG1	3	2.84	low	No	No	Compara, eggNOG, OrthoDB
382	FBgn0051121	CG31121	FastEpistasis	0	0	1	0	0	0	0	FBGN0051121	CG31121	42975	FBgn0051121	CG31121	Human	64137	13884	ABCG4	2	1.83	low	No	No	Compara, eggNOG
383	FBgn0051205	CG31205	FastEpistasis	0	0	0	0	1	0	0	FBGN0051205	CG31205	318626	FBgn0051205	CG31205	Human	377047	30717	PRSS45P	1	0.93	low	Yes	No	Compara
383	FBgn0051205	CG31205	FastEpistasis	0	0	0	0	1	0	0	FBGN0051205	CG31205	318626	FBgn0051205	CG31205	Human	3001	4708	GZMA	1	0.93	low	Yes	Yes	Compara
383	FBgn0051205	CG31205	FastEpistasis	0	0	0	0	1	0	0	FBGN0051205	CG31205	318626	FBgn0051205	CG31205	Human	3082	4893	HGF	1	0.93	low	Yes	No	Compara
383	FBgn0051205	CG31205	FastEpistasis	0	0	0	0	1	0	0	FBGN0051205	CG31205	318626	FBgn0051205	CG31205	Human	113791	24942	PIK3IP1	1	0.93	low	Yes	Yes	Compara
383	FBgn0051205	CG31205	FastEpistasis	0	0	0	0	1	0	0	FBGN0051205	CG31205	318626	FBgn0051205	CG31205	Human	3003	4711	GZMK	1	0.93	low	Yes	Yes	Compara
383	FBgn0051205	CG31205	FastEpistasis	0	0	0	0	1	0	0	FBGN0051205	CG31205	318626	FBgn0051205	CG31205	Human	3026	4798	HABP2	1	0.93	low	Yes	Yes	Compara
383	FBgn0051205	CG31205	FastEpistasis	0	0	0	0	1	0	0	FBGN0051205	CG31205	318626	FBgn0051205	CG31205	Human	4485	7380	MST1	1	0.93	low	Yes	Yes	Compara
383	FBgn0051205	CG31205	FastEpistasis	0	0	0	0	1	0	0	FBGN0051205	CG31205	318626	FBgn0051205	CG31205	Human	25891	24554	PAMR1	1	0.91	low	Yes	No	Phylome
383	FBgn0051205	CG31205	FastEpistasis	0	0	0	0	1	0	0	FBGN0051205	CG31205	318626	FBgn0051205	CG31205	Human	345062	24635	PRSS48	1	0.91	low	Yes	No	Phylome
392	FBgn0052982	CG32982	FastEpistasis	0	1	0	0	0	0	0	FBGN0052982	CG32982	34237	FBgn0052982	CG32982	Human	5341	9070	PLEK	1	1.1	low	Yes	Yes	Panther
392	FBgn0052982	CG32982	FastEpistasis	0	1	0	0	0	0	0	FBGN0052982	CG32982	34237	FBgn0052982	CG32982	Human	26499	19238	PLEK2	1	1.1	low	Yes	Yes	Panther
394	FBgn0085405	CG34376	FastEpistasis	0	1	0	0	0	0	0	FBGN0085405	CG34376	42638	FBgn0085405	CG34376	Human	112939	20967	NACC1	1	1.05	low	Yes	No	Inparanoid
394	FBgn0085405	CG34376	FastEpistasis	0	1	0	0	0	0	0	FBGN0085405	CG34376	42638	FBgn0085405	CG34376	Human	138151	23846	NACC2	1	1.05	low	Yes	Yes	Inparanoid
394	FBgn0085405	CG34376	FastEpistasis	0	1	0	0	0	0	0	FBGN0085405	CG34376	42638	FBgn0085405	CG34376	Human	643376	37214	BTBD18	1	1	low	Yes	No	OrthoFinder
394	FBgn0085405	CG34376	FastEpistasis	0	1	0	0	0	0	0	FBGN0085405	CG34376	42638	FBgn0085405	CG34376	Human	221504	28323	ZBTB9	1	0.91	low	Yes	Yes	Phylome
404	FBgn0263077	CG43340	FastEpistasis	0	0	0	1	0	0	0	FBGN0263077	CG43340	35698	FBgn0263077	CG43340	Human	135656	21666	MUCL3	1	0.9	low	Yes	Yes	eggNOG
404	FBgn0263077	CG43340	FastEpistasis	0	0	0	1	0	0	0	FBGN0263077	CG43340	35698	FBgn0263077	CG43340	Human	6101	10263	RP1	1	0.9	low	Yes	Yes	eggNOG
404	FBgn0263077	CG43340	FastEpistasis	0	0	0	1	0	0	0	FBGN0263077	CG43340	35698	FBgn0263077	CG43340	Human	123169	30401	LEO1	1	0.9	low	Yes	No	eggNOG
404	FBgn0263077	CG43340	FastEpistasis	0	0	0	1	0	0	0	FBGN0263077	CG43340	35698	FBgn0263077	CG43340	Human	1758	2932	DMP1	1	0.9	low	Yes	Yes	eggNOG
404	FBgn0263077	CG43340	FastEpistasis	0	0	0	1	0	0	0	FBGN0263077	CG43340	35698	FBgn0263077	CG43340	Human	3381	5341	IBSP	1	0.9	low	Yes	Yes	eggNOG
405	FBgn0028481	CG4341	FastEpistasis	0	0	0	0	1	0	0	FBGN0028481	CG4341	33276	FBgn0028481	CG4341	Human	160418	26899	TMTC3	2	1.91	low	No	No	eggNOG, OrthoDB
405	FBgn0028481	CG4341	FastEpistasis	0	0	0	0	1	0	0	FBGN0028481	CG4341	33276	FBgn0028481	CG4341	Human	84899	25904	TMTC4	2	1.91	low	No	No	eggNOG, OrthoDB
406	FBgn0263706	CG43658	FastEpistasis	0	1	0	0	0	0	0	FBGN0263706	CG43658	32729	FBgn0263706	CG43658	Human	9828	21726	ARHGEF17	3	2.94	low	No	No	eggNOG, OrthoDB, RoundUp
407	FBgn0263846	CG43707	FastEpistasis	0	0	0	0	0	1	0	FBGN0263846	CG43707	33601	FBgn0263846	CG43707	Human	84687	9298	PPP1R9B	1	1.03	low	Yes	No	RoundUp
407	FBgn0263846	CG43707	FastEpistasis	0	0	0	0	0	1	0	FBGN0263846	CG43707	33601	FBgn0263846	CG43707	Human	54477	30036	PLEKHA5	1	1.03	low	Yes	No	RoundUp
407	FBgn0263846	CG43707	FastEpistasis	0	0	0	0	0	1	0	FBGN0263846	CG43707	33601	FBgn0263846	CG43707	Human	10256	19700	CNKSR1	1	1.03	low	Yes	No	RoundUp
407	FBgn0263846	CG43707	FastEpistasis	0	0	0	0	0	1	0	FBGN0263846	CG43707	33601	FBgn0263846	CG43707	Human	55607	14946	PPP1R9A	1	1.03	low	Yes	No	RoundUp
407	FBgn0263846	CG43707	FastEpistasis	0	0	0	0	0	1	0	FBGN0263846	CG43707	33601	FBgn0263846	CG43707	Human	160622	18707	GRASP	1	0.9	low	Yes	No	eggNOG
407	FBgn0263846	CG43707	FastEpistasis	0	0	0	0	0	1	0	FBGN0263846	CG43707	33601	FBgn0263846	CG43707	Human	9595	9506	CYTIP	1	0.9	low	Yes	No	eggNOG
407	FBgn0263846	CG43707	FastEpistasis	0	0	0	0	0	1	0	FBGN0263846	CG43707	33601	FBgn0263846	CG43707	Human	10083	12597	USH1C	1	0.9	low	Yes	No	eggNOG
407	FBgn0263846	CG43707	FastEpistasis	0	0	0	0	0	1	0	FBGN0263846	CG43707	33601	FBgn0263846	CG43707	Human	51248	28034	PDZD11	1	0.9	low	Yes	No	eggNOG
407	FBgn0263846	CG43707	FastEpistasis	0	0	0	0	0	1	0	FBGN0263846	CG43707	33601	FBgn0263846	CG43707	Human	57120	17643	GOPC	1	0.9	low	Yes	Yes	eggNOG
407	FBgn0263846	CG43707	FastEpistasis	0	0	0	0	0	1	0	FBGN0263846	CG43707	33601	FBgn0263846	CG43707	Human	117583	14446	PARD3B	1	0.9	low	Yes	No	eggNOG
407	FBgn0263846	CG43707	FastEpistasis	0	0	0	0	0	1	0	FBGN0263846	CG43707	33601	FBgn0263846	CG43707	Human	84708	6657	LNX1	1	0.9	low	Yes	No	eggNOG
407	FBgn0263846	CG43707	FastEpistasis	0	0	0	0	0	1	0	FBGN0263846	CG43707	33601	FBgn0263846	CG43707	Human	222484	20421	LNX2	1	0.9	low	Yes	No	eggNOG
407	FBgn0263846	CG43707	FastEpistasis	0	0	0	0	0	1	0	FBGN0263846	CG43707	33601	FBgn0263846	CG43707	Human	143162	28572	FRMPD2	1	0.9	low	Yes	No	eggNOG
407	FBgn0263846	CG43707	FastEpistasis	0	0	0	0	0	1	0	FBGN0263846	CG43707	33601	FBgn0263846	CG43707	Human	55333	18955	SYNJ2BP	1	0.9	low	Yes	No	eggNOG
407	FBgn0263846	CG43707	FastEpistasis	0	0	0	0	0	1	0	FBGN0263846	CG43707	33601	FBgn0263846	CG43707	Human	25861	16361	WHRN	1	0.9	low	Yes	No	eggNOG
407	FBgn0263846	CG43707	FastEpistasis	0	0	0	0	0	1	0	FBGN0263846	CG43707	33601	FBgn0263846	CG43707	Human	100529257	48350	SYNJ2BP-COX16	1	0.9	low	Yes	No	eggNOG
407	FBgn0263846	CG43707	FastEpistasis	0	0	0	0	0	1	0	FBGN0263846	CG43707	33601	FBgn0263846	CG43707	Human	9351	11076	SLC9A3R2	1	0.9	low	Yes	No	eggNOG
407	FBgn0263846	CG43707	FastEpistasis	0	0	0	0	0	1	0	FBGN0263846	CG43707	33601	FBgn0263846	CG43707	Human	10207	28881	PATJ	1	0.9	low	Yes	No	eggNOG
407	FBgn0263846	CG43707	FastEpistasis	0	0	0	0	0	1	0	FBGN0263846	CG43707	33601	FBgn0263846	CG43707	Human	9231	2904	DLG5	1	0.9	low	Yes	No	eggNOG
407	FBgn0263846	CG43707	FastEpistasis	0	0	0	0	0	1	0	FBGN0263846	CG43707	33601	FBgn0263846	CG43707	Human	3603	5980	IL16	1	0.9	low	Yes	No	eggNOG
407	FBgn0263846	CG43707	FastEpistasis	0	0	0	0	0	1	0	FBGN0263846	CG43707	33601	FBgn0263846	CG43707	Human	23037	18486	PDZD2	1	0.9	low	Yes	No	eggNOG
407	FBgn0263846	CG43707	FastEpistasis	0	0	0	0	0	1	0	FBGN0263846	CG43707	33601	FBgn0263846	CG43707	Human	392862	18464	GRID2IP	1	0.9	low	Yes	No	eggNOG
407	FBgn0263846	CG43707	FastEpistasis	0	0	0	0	0	1	0	FBGN0263846	CG43707	33601	FBgn0263846	CG43707	Human	9368	11075	SLC9A3R1	1	0.9	low	Yes	No	eggNOG
407	FBgn0263846	CG43707	FastEpistasis	0	0	0	0	0	1	0	FBGN0263846	CG43707	33601	FBgn0263846	CG43707	Human	79955	26257	PDZD7	1	0.9	low	Yes	No	eggNOG
407	FBgn0263846	CG43707	FastEpistasis	0	0	0	0	0	1	0	FBGN0263846	CG43707	33601	FBgn0263846	CG43707	Human	5174	8821	PDZK1	1	0.9	low	Yes	No	eggNOG
407	FBgn0263846	CG43707	FastEpistasis	0	0	0	0	0	1	0	FBGN0263846	CG43707	33601	FBgn0263846	CG43707	Human	23426	18708	GRIP1	1	0.9	low	Yes	No	eggNOG
407	FBgn0263846	CG43707	FastEpistasis	0	0	0	0	0	1	0	FBGN0263846	CG43707	33601	FBgn0263846	CG43707	Human	8777	7208	MPDZ	1	0.9	low	Yes	No	eggNOG
407	FBgn0263846	CG43707	FastEpistasis	0	0	0	0	0	1	0	FBGN0263846	CG43707	33601	FBgn0263846	CG43707	Human	79849	19891	PDZD3	1	0.9	low	Yes	No	eggNOG
407	FBgn0263846	CG43707	FastEpistasis	0	0	0	0	0	1	0	FBGN0263846	CG43707	33601	FBgn0263846	CG43707	Human	56288	16051	PARD3	1	0.9	low	Yes	No	eggNOG
408	FBgn0265002	CG44153	FastEpistasis	0	0	1	0	1	1	1	FBGN0265002	CG44153	34341	FBgn0265002	CG44153	Human	27255	2176	CNTN6	1	1.1	low	Yes	No	Panther
408	FBgn0265002	CG44153	FastEpistasis	0	0	1	0	1	1	1	FBGN0265002	CG44153	34341	FBgn0265002	CG44153	Human	1826	3039	DSCAM	1	1.1	low	Yes	No	Panther
408	FBgn0265002	CG44153	FastEpistasis	0	0	1	0	1	1	1	FBGN0265002	CG44153	34341	FBgn0265002	CG44153	Human	152330	2174	CNTN4	1	1.1	low	Yes	No	Panther
408	FBgn0265002	CG44153	FastEpistasis	0	0	1	0	1	1	1	FBGN0265002	CG44153	34341	FBgn0265002	CG44153	Human	6900	2172	CNTN2	1	1.1	low	Yes	No	Panther
408	FBgn0265002	CG44153	FastEpistasis	0	0	1	0	1	1	1	FBGN0265002	CG44153	34341	FBgn0265002	CG44153	Human	57453	14656	DSCAML1	1	1.1	low	Yes	No	Panther
408	FBgn0265002	CG44153	FastEpistasis	0	0	1	0	1	1	1	FBGN0265002	CG44153	34341	FBgn0265002	CG44153	Human	23022	17068	PALLD	1	1.1	low	Yes	No	Panther
408	FBgn0265002	CG44153	FastEpistasis	0	0	1	0	1	1	1	FBGN0265002	CG44153	34341	FBgn0265002	CG44153	Human	84665	23246	MYPN	1	1.1	low	Yes	No	Panther
408	FBgn0265002	CG44153	FastEpistasis	0	0	1	0	1	1	1	FBGN0265002	CG44153	34341	FBgn0265002	CG44153	Human	577	945	ADGRB3	1	0.91	low	Yes	Yes	Phylome
409	FBgn0038750	CG4465	FastEpistasis	1	0	0	0	0	0	0	FBGN0038750	CG4465	42374	FBgn0038750	CG4465	Human	55530	25417	SVOP	2	1.9	low	No	No	eggNOG, OrthoFinder
409	FBgn0038750	CG4465	FastEpistasis	1	0	0	0	0	0	0	FBGN0038750	CG4465	42374	FBgn0038750	CG4465	Human	55356	20301	SLC22A15	2	1.83	low	No	No	Compara, eggNOG
412	FBgn0027556	CG4928	FastEpistasis	0	0	0	1	0	0	0	FBGN0027556	CG4928	32682	FBgn0027556	CG4928	Human	81622	13481	UNC93B1	2	1.83	low	No	No	Compara, eggNOG
419	FBgn0038127	CG8476	FastEpistasis	0	0	0	0	1	1	0	FBGN0038127	CG8476	41624	FBgn0038127	CG8476	Human	11080	14886	DNAJB4	2	1.9	low	No	No	eggNOG, OrthoFinder
419	FBgn0038127	CG8476	FastEpistasis	0	0	0	0	1	1	0	FBGN0038127	CG8476	41624	FBgn0038127	CG8476	Human	374407	30718	DNAJB13	2	1.9	low	No	No	eggNOG, OrthoFinder
419	FBgn0038127	CG8476	FastEpistasis	0	0	0	0	1	1	0	FBGN0038127	CG8476	41624	FBgn0038127	CG8476	Human	3337	5270	DNAJB1	2	1.9	low	No	No	eggNOG, OrthoFinder
419	FBgn0038127	CG8476	FastEpistasis	0	0	0	0	1	1	0	FBGN0038127	CG8476	41624	FBgn0038127	CG8476	Human	25822	14887	DNAJB5	2	1.9	low	No	No	eggNOG, OrthoFinder
421	FBgn0263132	Cht6	FastEpistasis	0	0	0	0	0	0	1	FBGN0263132	Cht6	31935	FBgn0263132	Cht6	Human	1117	1933	CHI3L2	3	3.11	low	No	No	OrthoDB, OrthoFinder, Panther
424	FBgn0005775	Con	FastEpistasis	0	0	0	0	1	0	0	FBGN0005775	Con	38590	FBgn0005775	Con	Human	100130733	35155	LRRC70	1	1.1	low	Yes	No	Panther
424	FBgn0005775	Con	FastEpistasis	0	0	0	0	1	0	0	FBGN0005775	Con	38590	FBgn0005775	Con	Human	60506	8082	NYX	1	1.01	low	Yes	No	OrthoDB
424	FBgn0005775	Con	FastEpistasis	0	0	0	0	1	0	0	FBGN0005775	Con	38590	FBgn0005775	Con	Human	105373381	NA	LOC105373381	1	1.01	low	Yes	Yes	OrthoDB
424	FBgn0005775	Con	FastEpistasis	0	0	0	0	1	0	0	FBGN0005775	Con	38590	FBgn0005775	Con	Human	339398	31814	LINGO4	1	1	low	Yes	Yes	OrthoFinder
424	FBgn0005775	Con	FastEpistasis	0	0	0	0	1	0	0	FBGN0005775	Con	38590	FBgn0005775	Con	Human	645191	21206	LINGO3	1	1	low	Yes	No	OrthoFinder
424	FBgn0005775	Con	FastEpistasis	0	0	0	0	1	0	0	FBGN0005775	Con	38590	FBgn0005775	Con	Human	158038	21207	LINGO2	1	1	low	Yes	No	OrthoFinder
424	FBgn0005775	Con	FastEpistasis	0	0	0	0	1	0	0	FBGN0005775	Con	38590	FBgn0005775	Con	Human	84894	21205	LINGO1	1	1	low	Yes	No	OrthoFinder
424	FBgn0005775	Con	FastEpistasis	0	0	0	0	1	0	0	FBGN0005775	Con	38590	FBgn0005775	Con	Human	9211	6572	LGI1	1	0.93	low	Yes	No	Compara
424	FBgn0005775	Con	FastEpistasis	0	0	0	0	1	0	0	FBGN0005775	Con	38590	FBgn0005775	Con	Human	8549	4504	LGR5	1	0.93	low	Yes	No	Compara
424	FBgn0005775	Con	FastEpistasis	0	0	0	0	1	0	0	FBGN0005775	Con	38590	FBgn0005775	Con	Human	55366	13299	LGR4	1	0.93	low	Yes	No	Compara
424	FBgn0005775	Con	FastEpistasis	0	0	0	0	1	0	0	FBGN0005775	Con	38590	FBgn0005775	Con	Human	389816	31409	LRRC26	1	0.93	low	Yes	Yes	Compara
424	FBgn0005775	Con	FastEpistasis	0	0	0	0	1	0	0	FBGN0005775	Con	38590	FBgn0005775	Con	Human	203190	18711	LGI3	1	0.93	low	Yes	Yes	Compara
424	FBgn0005775	Con	FastEpistasis	0	0	0	0	1	0	0	FBGN0005775	Con	38590	FBgn0005775	Con	Human	150356	25165	CHADL	1	0.93	low	Yes	No	Compara
424	FBgn0005775	Con	FastEpistasis	0	0	0	0	1	0	0	FBGN0005775	Con	38590	FBgn0005775	Con	Human	9865	22200	TRIL	1	0.93	low	Yes	No	Compara
424	FBgn0005775	Con	FastEpistasis	0	0	0	0	1	0	0	FBGN0005775	Con	38590	FBgn0005775	Con	Human	345193	24783	LRIT3	1	0.93	low	Yes	Yes	Compara
424	FBgn0005775	Con	FastEpistasis	0	0	0	0	1	0	0	FBGN0005775	Con	38590	FBgn0005775	Con	Human	121227	30991	LRIG3	1	0.93	low	Yes	No	Compara
424	FBgn0005775	Con	FastEpistasis	0	0	0	0	1	0	0	FBGN0005775	Con	38590	FBgn0005775	Con	Human	440699	32156	LRRC52	1	0.93	low	Yes	Yes	Compara
424	FBgn0005775	Con	FastEpistasis	0	0	0	0	1	0	0	FBGN0005775	Con	38590	FBgn0005775	Con	Human	55203	18710	LGI2	1	0.93	low	Yes	Yes	Compara
424	FBgn0005775	Con	FastEpistasis	0	0	0	0	1	0	0	FBGN0005775	Con	38590	FBgn0005775	Con	Human	392617	33154	ELFN1	1	0.93	low	Yes	Yes	Compara
424	FBgn0005775	Con	FastEpistasis	0	0	0	0	1	0	0	FBGN0005775	Con	38590	FBgn0005775	Con	Human	1101	1909	CHAD	1	0.93	low	Yes	No	Compara
424	FBgn0005775	Con	FastEpistasis	0	0	0	0	1	0	0	FBGN0005775	Con	38590	FBgn0005775	Con	Human	26045	19409	LRRTM2	1	0.93	low	Yes	Yes	Compara
424	FBgn0005775	Con	FastEpistasis	0	0	0	0	1	0	0	FBGN0005775	Con	38590	FBgn0005775	Con	Human	26103	23404	LRIT1	1	0.93	low	Yes	Yes	Compara
424	FBgn0005775	Con	FastEpistasis	0	0	0	0	1	0	0	FBGN0005775	Con	38590	FBgn0005775	Con	Human	163175	18712	LGI4	1	0.93	low	Yes	No	Compara
424	FBgn0005775	Con	FastEpistasis	0	0	0	0	1	0	0	FBGN0005775	Con	38590	FBgn0005775	Con	Human	114794	29396	ELFN2	1	0.93	low	Yes	Yes	Compara
424	FBgn0005775	Con	FastEpistasis	0	0	0	0	1	0	0	FBGN0005775	Con	38590	FBgn0005775	Con	Human	116844	29480	LRG1	1	0.93	low	Yes	Yes	Compara
424	FBgn0005775	Con	FastEpistasis	0	0	0	0	1	0	0	FBGN0005775	Con	38590	FBgn0005775	Con	Human	1370	2313	CPN2	1	0.93	low	Yes	No	Compara
424	FBgn0005775	Con	FastEpistasis	0	0	0	0	1	0	0	FBGN0005775	Con	38590	FBgn0005775	Con	Human	9860	20889	LRIG2	1	0.93	low	Yes	No	Compara
424	FBgn0005775	Con	FastEpistasis	0	0	0	0	1	0	0	FBGN0005775	Con	38590	FBgn0005775	Con	Human	59352	19719	LGR6	1	0.93	low	Yes	No	Compara
424	FBgn0005775	Con	FastEpistasis	0	0	0	0	1	0	0	FBGN0005775	Con	38590	FBgn0005775	Con	Human	441381	28947	LRRC24	1	0.93	low	Yes	No	Compara
426	FBgn0039637	CG11880	FastEpistasis	0	1	0	0	0	0	0	FBGN0039637	Ctl2	43440	FBgn0039637	Ctl2	Human	126969	28689	SLC44A3	3	2.84	low	No	No	Compara, eggNOG, OrthoDB
426	FBgn0039637	CG11880	FastEpistasis	0	1	0	0	0	0	0	FBGN0039637	Ctl2	43440	FBgn0039637	Ctl2	Human	23446	18798	SLC44A1	2	1.91	low	No	No	eggNOG, OrthoDB
428	FBgn0028382	cyp33	FastEpistasis	0	0	0	0	0	0	1	FBGN0028382	cyp33	36984	FBgn0028382	cyp33	Human	10105	9259	PPIF	3	3.01	low	No	No	eggNOG, OrthoDB, Panther
428	FBgn0028382	cyp33	FastEpistasis	0	0	0	0	0	0	1	FBGN0028382	cyp33	36984	FBgn0028382	cyp33	Human	644591	33996	PPIAL4G	3	3.01	low	No	No	eggNOG, OrthoDB, Panther
428	FBgn0028382	cyp33	FastEpistasis	0	0	0	0	0	0	1	FBGN0028382	cyp33	36984	FBgn0028382	cyp33	Human	653598	33995	PPIAL4C	3	3.01	low	No	No	eggNOG, OrthoDB, Panther
428	FBgn0028382	cyp33	FastEpistasis	0	0	0	0	0	0	1	FBGN0028382	cyp33	36984	FBgn0028382	cyp33	Human	5478	9253	PPIA	3	3.01	low	No	No	eggNOG, OrthoDB, Panther
428	FBgn0028382	cyp33	FastEpistasis	0	0	0	0	0	0	1	FBGN0028382	cyp33	36984	FBgn0028382	cyp33	Human	105371242	53889	PPIAL4H	3	3.01	low	No	No	eggNOG, OrthoDB, Panther
428	FBgn0028382	cyp33	FastEpistasis	0	0	0	0	0	0	1	FBGN0028382	cyp33	36984	FBgn0028382	cyp33	Human	728945	33999	PPIAL4F	3	3.01	low	No	No	eggNOG, OrthoDB, Panther
428	FBgn0028382	cyp33	FastEpistasis	0	0	0	0	0	0	1	FBGN0028382	cyp33	36984	FBgn0028382	cyp33	Human	645142	33998	PPIAL4D	2	2	low	No	No	eggNOG, Panther
428	FBgn0028382	cyp33	FastEpistasis	0	0	0	0	0	0	1	FBGN0028382	cyp33	36984	FBgn0028382	cyp33	Human	730262	33997	PPIAL4E	2	2	low	No	No	eggNOG, Panther
428	FBgn0028382	cyp33	FastEpistasis	0	0	0	0	0	0	1	FBGN0028382	cyp33	36984	FBgn0028382	cyp33	Human	653505	24369	PPIAL4A	2	2	low	No	No	eggNOG, Panther
429	FBgn0034053	Cyp4aa1	FastEpistasis	0	0	0	1	0	0	0	FBGN0034053	Cyp4aa1	36752	FBgn0034053	Cyp4aa1	Human	1588	2594	CYP19A1	3	2.93	low	No	No	Compara, eggNOG, Panther
429	FBgn0034053	Cyp4aa1	FastEpistasis	0	0	0	1	0	0	0	FBGN0034053	Cyp4aa1	36752	FBgn0034053	Cyp4aa1	Human	1579	2642	CYP4A11	2	1.83	low	No	No	Compara, eggNOG
429	FBgn0034053	Cyp4aa1	FastEpistasis	0	0	0	1	0	0	0	FBGN0034053	Cyp4aa1	36752	FBgn0034053	Cyp4aa1	Human	199974	20583	CYP4Z1	2	1.83	low	No	No	Compara, eggNOG
429	FBgn0034053	Cyp4aa1	FastEpistasis	0	0	0	1	0	0	0	FBGN0034053	Cyp4aa1	36752	FBgn0034053	Cyp4aa1	Human	4051	2646	CYP4F3	2	1.83	low	No	No	Compara, eggNOG
429	FBgn0034053	Cyp4aa1	FastEpistasis	0	0	0	1	0	0	0	FBGN0034053	Cyp4aa1	36752	FBgn0034053	Cyp4aa1	Human	1580	2644	CYP4B1	2	1.83	low	No	No	Compara, eggNOG
429	FBgn0034053	Cyp4aa1	FastEpistasis	0	0	0	1	0	0	0	FBGN0034053	Cyp4aa1	36752	FBgn0034053	Cyp4aa1	Human	57834	13265	CYP4F11	2	1.83	low	No	No	Compara, eggNOG
429	FBgn0034053	Cyp4aa1	FastEpistasis	0	0	0	1	0	0	0	FBGN0034053	Cyp4aa1	36752	FBgn0034053	Cyp4aa1	Human	8529	2645	CYP4F2	2	1.83	low	No	No	Compara, eggNOG
429	FBgn0034053	Cyp4aa1	FastEpistasis	0	0	0	1	0	0	0	FBGN0034053	Cyp4aa1	36752	FBgn0034053	Cyp4aa1	Human	260293	20244	CYP4X1	2	1.83	low	No	No	Compara, eggNOG
429	FBgn0034053	Cyp4aa1	FastEpistasis	0	0	0	1	0	0	0	FBGN0034053	Cyp4aa1	36752	FBgn0034053	Cyp4aa1	Human	11283	2648	CYP4F8	2	1.83	low	No	No	Compara, eggNOG
429	FBgn0034053	Cyp4aa1	FastEpistasis	0	0	0	1	0	0	0	FBGN0034053	Cyp4aa1	36752	FBgn0034053	Cyp4aa1	Human	126410	26820	CYP4F22	2	1.83	low	No	No	Compara, eggNOG
429	FBgn0034053	Cyp4aa1	FastEpistasis	0	0	0	1	0	0	0	FBGN0034053	Cyp4aa1	36752	FBgn0034053	Cyp4aa1	Human	66002	18857	CYP4F12	2	1.83	low	No	No	Compara, eggNOG
429	FBgn0034053	Cyp4aa1	FastEpistasis	0	0	0	1	0	0	0	FBGN0034053	Cyp4aa1	36752	FBgn0034053	Cyp4aa1	Human	284541	20575	CYP4A22	2	1.83	low	No	No	Compara, eggNOG
430	FBgn0031461	daw	FastEpistasis	0	1	0	0	0	0	0	FBGN0031461	daw	33474	FBgn0031461	daw	Human	3625	6067	INHBB	3	2.91	low	No	No	eggNOG, OrthoDB, OrthoFinder
430	FBgn0031461	daw	FastEpistasis	0	1	0	0	0	0	0	FBGN0031461	daw	33474	FBgn0031461	daw	Human	3624	6066	INHBA	3	2.91	low	No	No	eggNOG, OrthoDB, OrthoFinder
430	FBgn0031461	daw	FastEpistasis	0	1	0	0	0	0	0	FBGN0031461	daw	33474	FBgn0031461	daw	Human	2657	4214	GDF1	2	2	low	No	No	eggNOG, Panther
430	FBgn0031461	daw	FastEpistasis	0	1	0	0	0	0	0	FBGN0031461	daw	33474	FBgn0031461	daw	Human	9518	30142	GDF15	2	2	low	No	No	eggNOG, Panther
430	FBgn0031461	daw	FastEpistasis	0	1	0	0	0	0	0	FBGN0031461	daw	33474	FBgn0031461	daw	Human	650	1069	BMP2	2	2	low	No	No	eggNOG, Panther
430	FBgn0031461	daw	FastEpistasis	0	1	0	0	0	0	0	FBGN0031461	daw	33474	FBgn0031461	daw	Human	7043	11769	TGFB3	2	2	low	No	No	eggNOG, Panther
430	FBgn0031461	daw	FastEpistasis	0	1	0	0	0	0	0	FBGN0031461	daw	33474	FBgn0031461	daw	Human	9573	4218	GDF3	2	2	low	No	No	eggNOG, Panther
430	FBgn0031461	daw	FastEpistasis	0	1	0	0	0	0	0	FBGN0031461	daw	33474	FBgn0031461	daw	Human	652	1071	BMP4	2	2	low	No	No	eggNOG, Panther
432	FBgn0013810	Dhc36C	FastEpistasis	0	0	1	0	0	0	0	FBGN0013810	Dhc36C	35061	FBgn0013810	Dhc36C	Human	1769	2952	DNAH8	3	2.8	low	No	No	eggNOG, OrthoFinder, orthoMCL
432	FBgn0013810	Dhc36C	FastEpistasis	0	0	1	0	0	0	0	FBGN0013810	Dhc36C	35061	FBgn0013810	Dhc36C	Human	1768	2951	DNAH6	3	2.8	low	No	No	eggNOG, OrthoFinder, orthoMCL
432	FBgn0013810	Dhc36C	FastEpistasis	0	0	1	0	0	0	0	FBGN0013810	Dhc36C	35061	FBgn0013810	Dhc36C	Human	8701	2942	DNAH11	3	2.8	low	No	No	eggNOG, OrthoFinder, orthoMCL
432	FBgn0013810	Dhc36C	FastEpistasis	0	0	1	0	0	0	0	FBGN0013810	Dhc36C	35061	FBgn0013810	Dhc36C	Human	196385	2941	DNAH10	3	2.8	low	No	No	eggNOG, OrthoFinder, orthoMCL
432	FBgn0013810	Dhc36C	FastEpistasis	0	0	1	0	0	0	0	FBGN0013810	Dhc36C	35061	FBgn0013810	Dhc36C	Human	8632	2946	DNAH17	3	2.8	low	No	No	eggNOG, OrthoFinder, orthoMCL
432	FBgn0013810	Dhc36C	FastEpistasis	0	0	1	0	0	0	0	FBGN0013810	Dhc36C	35061	FBgn0013810	Dhc36C	Human	146754	2948	DNAH2	3	2.8	low	No	No	eggNOG, OrthoFinder, orthoMCL
432	FBgn0013810	Dhc36C	FastEpistasis	0	0	1	0	0	0	0	FBGN0013810	Dhc36C	35061	FBgn0013810	Dhc36C	Human	1767	2950	DNAH5	3	2.8	low	No	No	eggNOG, OrthoFinder, orthoMCL
432	FBgn0013810	Dhc36C	FastEpistasis	0	0	1	0	0	0	0	FBGN0013810	Dhc36C	35061	FBgn0013810	Dhc36C	Human	25981	2940	DNAH1	3	2.8	low	No	No	eggNOG, OrthoFinder, orthoMCL
432	FBgn0013810	Dhc36C	FastEpistasis	0	0	1	0	0	0	0	FBGN0013810	Dhc36C	35061	FBgn0013810	Dhc36C	Human	1770	2953	DNAH9	3	2.8	low	No	No	eggNOG, OrthoFinder, orthoMCL
432	FBgn0013810	Dhc36C	FastEpistasis	0	0	1	0	0	0	0	FBGN0013810	Dhc36C	35061	FBgn0013810	Dhc36C	Human	127602	2945	DNAH14	2	1.9	low	No	No	OrthoFinder, orthoMCL
432	FBgn0013810	Dhc36C	FastEpistasis	0	0	1	0	0	0	0	FBGN0013810	Dhc36C	35061	FBgn0013810	Dhc36C	Human	1778	2961	DYNC1H1	2	1.8	low	No	No	eggNOG, orthoMCL
432	FBgn0013810	Dhc36C	FastEpistasis	0	0	1	0	0	0	0	FBGN0013810	Dhc36C	35061	FBgn0013810	Dhc36C	Human	79659	2962	DYNC2H1	2	1.8	low	No	No	eggNOG, orthoMCL
434	FBgn0261871	dpr2	FastEpistasis	0	0	0	1	0	0	0	FBGN0261871	dpr2	3346227	FBgn0261871	dpr2	Human	284759	16247	SIRPB2	1	0.91	low	Yes	Yes	Phylome
434	FBgn0261871	dpr2	FastEpistasis	0	0	0	1	0	0	0	FBGN0261871	dpr2	3346227	FBgn0261871	dpr2	Human	1826	3039	DSCAM	1	0.9	low	Yes	No	eggNOG
434	FBgn0261871	dpr2	FastEpistasis	0	0	0	1	0	0	0	FBGN0261871	dpr2	3346227	FBgn0261871	dpr2	Human	54549	19308	SDK2	1	0.9	low	Yes	No	eggNOG
434	FBgn0261871	dpr2	FastEpistasis	0	0	0	1	0	0	0	FBGN0261871	dpr2	3346227	FBgn0261871	dpr2	Human	402665	34550	IGLON5	1	0.9	low	Yes	No	eggNOG
434	FBgn0261871	dpr2	FastEpistasis	0	0	0	1	0	0	0	FBGN0261871	dpr2	3346227	FBgn0261871	dpr2	Human	84063	18816	KIRREL2	1	0.9	low	Yes	No	eggNOG
434	FBgn0261871	dpr2	FastEpistasis	0	0	0	1	0	0	0	FBGN0261871	dpr2	3346227	FBgn0261871	dpr2	Human	7399	12601	USH2A	1	0.9	low	Yes	Yes	eggNOG
434	FBgn0261871	dpr2	FastEpistasis	0	0	0	1	0	0	0	FBGN0261871	dpr2	3346227	FBgn0261871	dpr2	Human	221935	19307	SDK1	1	0.9	low	Yes	No	eggNOG
434	FBgn0261871	dpr2	FastEpistasis	0	0	0	1	0	0	0	FBGN0261871	dpr2	3346227	FBgn0261871	dpr2	Human	345193	24783	LRIT3	1	0.9	low	Yes	Yes	eggNOG
434	FBgn0261871	dpr2	FastEpistasis	0	0	0	1	0	0	0	FBGN0261871	dpr2	3346227	FBgn0261871	dpr2	Human	257194	17302	NEGR1	1	0.9	low	Yes	No	eggNOG
434	FBgn0261871	dpr2	FastEpistasis	0	0	0	1	0	0	0	FBGN0261871	dpr2	3346227	FBgn0261871	dpr2	Human	89932	19262	PAPLN	1	0.9	low	Yes	No	eggNOG
434	FBgn0261871	dpr2	FastEpistasis	0	0	0	1	0	0	0	FBGN0261871	dpr2	3346227	FBgn0261871	dpr2	Human	57549	18132	IGSF9	1	0.9	low	Yes	No	eggNOG
434	FBgn0261871	dpr2	FastEpistasis	0	0	0	1	0	0	0	FBGN0261871	dpr2	3346227	FBgn0261871	dpr2	Human	374462	9679	PTPRQ	1	0.9	low	Yes	No	eggNOG
434	FBgn0261871	dpr2	FastEpistasis	0	0	0	1	0	0	0	FBGN0261871	dpr2	3346227	FBgn0261871	dpr2	Human	4978	8143	OPCML	1	0.9	low	Yes	No	eggNOG
434	FBgn0261871	dpr2	FastEpistasis	0	0	0	1	0	0	0	FBGN0261871	dpr2	3346227	FBgn0261871	dpr2	Human	4685	7657	NCAM2	1	0.9	low	Yes	No	eggNOG
434	FBgn0261871	dpr2	FastEpistasis	0	0	0	1	0	0	0	FBGN0261871	dpr2	3346227	FBgn0261871	dpr2	Human	26103	23404	LRIT1	1	0.9	low	Yes	Yes	eggNOG
434	FBgn0261871	dpr2	FastEpistasis	0	0	0	1	0	0	0	FBGN0261871	dpr2	3346227	FBgn0261871	dpr2	Human	4684	7656	NCAM1	1	0.9	low	Yes	No	eggNOG
434	FBgn0261871	dpr2	FastEpistasis	0	0	0	1	0	0	0	FBGN0261871	dpr2	3346227	FBgn0261871	dpr2	Human	22997	32326	IGSF9B	1	0.9	low	Yes	No	eggNOG
434	FBgn0261871	dpr2	FastEpistasis	0	0	0	1	0	0	0	FBGN0261871	dpr2	3346227	FBgn0261871	dpr2	Human	57453	14656	DSCAML1	1	0.9	low	Yes	No	eggNOG
434	FBgn0261871	dpr2	FastEpistasis	0	0	0	1	0	0	0	FBGN0261871	dpr2	3346227	FBgn0261871	dpr2	Human	4045	6705	LSAMP	1	0.9	low	Yes	No	eggNOG
434	FBgn0261871	dpr2	FastEpistasis	0	0	0	1	0	0	0	FBGN0261871	dpr2	3346227	FBgn0261871	dpr2	Human	84623	23204	KIRREL3	1	0.9	low	Yes	No	eggNOG
434	FBgn0261871	dpr2	FastEpistasis	0	0	0	1	0	0	0	FBGN0261871	dpr2	3346227	FBgn0261871	dpr2	Human	50863	17941	NTM	1	0.9	low	Yes	No	eggNOG
434	FBgn0261871	dpr2	FastEpistasis	0	0	0	1	0	0	0	FBGN0261871	dpr2	3346227	FBgn0261871	dpr2	Human	55243	15734	KIRREL1	1	0.9	low	Yes	No	eggNOG
435	FBgn0053516	dpr3	FastEpistasis	0	0	0	0	0	0	1	FBGN0053516	dpr3	3346208	FBgn0053516	dpr3	Human	1826	3039	DSCAM	1	0.9	low	Yes	No	eggNOG
435	FBgn0053516	dpr3	FastEpistasis	0	0	0	0	0	0	1	FBGN0053516	dpr3	3346208	FBgn0053516	dpr3	Human	54549	19308	SDK2	1	0.9	low	Yes	No	eggNOG
435	FBgn0053516	dpr3	FastEpistasis	0	0	0	0	0	0	1	FBGN0053516	dpr3	3346208	FBgn0053516	dpr3	Human	402665	34550	IGLON5	1	0.9	low	Yes	No	eggNOG
435	FBgn0053516	dpr3	FastEpistasis	0	0	0	0	0	0	1	FBGN0053516	dpr3	3346208	FBgn0053516	dpr3	Human	84063	18816	KIRREL2	1	0.9	low	Yes	No	eggNOG
435	FBgn0053516	dpr3	FastEpistasis	0	0	0	0	0	0	1	FBGN0053516	dpr3	3346208	FBgn0053516	dpr3	Human	7399	12601	USH2A	1	0.9	low	Yes	Yes	eggNOG
435	FBgn0053516	dpr3	FastEpistasis	0	0	0	0	0	0	1	FBGN0053516	dpr3	3346208	FBgn0053516	dpr3	Human	221935	19307	SDK1	1	0.9	low	Yes	No	eggNOG
435	FBgn0053516	dpr3	FastEpistasis	0	0	0	0	0	0	1	FBGN0053516	dpr3	3346208	FBgn0053516	dpr3	Human	345193	24783	LRIT3	1	0.9	low	Yes	Yes	eggNOG
435	FBgn0053516	dpr3	FastEpistasis	0	0	0	0	0	0	1	FBGN0053516	dpr3	3346208	FBgn0053516	dpr3	Human	257194	17302	NEGR1	1	0.9	low	Yes	No	eggNOG
435	FBgn0053516	dpr3	FastEpistasis	0	0	0	0	0	0	1	FBGN0053516	dpr3	3346208	FBgn0053516	dpr3	Human	89932	19262	PAPLN	1	0.9	low	Yes	No	eggNOG
435	FBgn0053516	dpr3	FastEpistasis	0	0	0	0	0	0	1	FBGN0053516	dpr3	3346208	FBgn0053516	dpr3	Human	57549	18132	IGSF9	1	0.9	low	Yes	No	eggNOG
435	FBgn0053516	dpr3	FastEpistasis	0	0	0	0	0	0	1	FBGN0053516	dpr3	3346208	FBgn0053516	dpr3	Human	374462	9679	PTPRQ	1	0.9	low	Yes	No	eggNOG
435	FBgn0053516	dpr3	FastEpistasis	0	0	0	0	0	0	1	FBGN0053516	dpr3	3346208	FBgn0053516	dpr3	Human	4978	8143	OPCML	1	0.9	low	Yes	No	eggNOG
435	FBgn0053516	dpr3	FastEpistasis	0	0	0	0	0	0	1	FBGN0053516	dpr3	3346208	FBgn0053516	dpr3	Human	4685	7657	NCAM2	1	0.9	low	Yes	No	eggNOG
435	FBgn0053516	dpr3	FastEpistasis	0	0	0	0	0	0	1	FBGN0053516	dpr3	3346208	FBgn0053516	dpr3	Human	26103	23404	LRIT1	1	0.9	low	Yes	Yes	eggNOG
435	FBgn0053516	dpr3	FastEpistasis	0	0	0	0	0	0	1	FBGN0053516	dpr3	3346208	FBgn0053516	dpr3	Human	4684	7656	NCAM1	1	0.9	low	Yes	No	eggNOG
435	FBgn0053516	dpr3	FastEpistasis	0	0	0	0	0	0	1	FBGN0053516	dpr3	3346208	FBgn0053516	dpr3	Human	22997	32326	IGSF9B	1	0.9	low	Yes	No	eggNOG
435	FBgn0053516	dpr3	FastEpistasis	0	0	0	0	0	0	1	FBGN0053516	dpr3	3346208	FBgn0053516	dpr3	Human	57453	14656	DSCAML1	1	0.9	low	Yes	No	eggNOG
435	FBgn0053516	dpr3	FastEpistasis	0	0	0	0	0	0	1	FBGN0053516	dpr3	3346208	FBgn0053516	dpr3	Human	4045	6705	LSAMP	1	0.9	low	Yes	No	eggNOG
435	FBgn0053516	dpr3	FastEpistasis	0	0	0	0	0	0	1	FBGN0053516	dpr3	3346208	FBgn0053516	dpr3	Human	84623	23204	KIRREL3	1	0.9	low	Yes	No	eggNOG
435	FBgn0053516	dpr3	FastEpistasis	0	0	0	0	0	0	1	FBGN0053516	dpr3	3346208	FBgn0053516	dpr3	Human	50863	17941	NTM	1	0.9	low	Yes	No	eggNOG
435	FBgn0053516	dpr3	FastEpistasis	0	0	0	0	0	0	1	FBGN0053516	dpr3	3346208	FBgn0053516	dpr3	Human	55243	15734	KIRREL1	1	0.9	low	Yes	No	eggNOG
437	FBgn0038282	dpr9	FastEpistasis	0	1	0	0	0	0	0	FBGN0038282	dpr9	2768670	FBgn0038282	dpr9	Human	1826	3039	DSCAM	1	0.9	low	Yes	No	eggNOG
437	FBgn0038282	dpr9	FastEpistasis	0	1	0	0	0	0	0	FBGN0038282	dpr9	2768670	FBgn0038282	dpr9	Human	54549	19308	SDK2	1	0.9	low	Yes	No	eggNOG
437	FBgn0038282	dpr9	FastEpistasis	0	1	0	0	0	0	0	FBGN0038282	dpr9	2768670	FBgn0038282	dpr9	Human	402665	34550	IGLON5	1	0.9	low	Yes	No	eggNOG
437	FBgn0038282	dpr9	FastEpistasis	0	1	0	0	0	0	0	FBGN0038282	dpr9	2768670	FBgn0038282	dpr9	Human	84063	18816	KIRREL2	1	0.9	low	Yes	No	eggNOG
437	FBgn0038282	dpr9	FastEpistasis	0	1	0	0	0	0	0	FBGN0038282	dpr9	2768670	FBgn0038282	dpr9	Human	7399	12601	USH2A	1	0.9	low	Yes	Yes	eggNOG
437	FBgn0038282	dpr9	FastEpistasis	0	1	0	0	0	0	0	FBGN0038282	dpr9	2768670	FBgn0038282	dpr9	Human	221935	19307	SDK1	1	0.9	low	Yes	No	eggNOG
437	FBgn0038282	dpr9	FastEpistasis	0	1	0	0	0	0	0	FBGN0038282	dpr9	2768670	FBgn0038282	dpr9	Human	345193	24783	LRIT3	1	0.9	low	Yes	Yes	eggNOG
437	FBgn0038282	dpr9	FastEpistasis	0	1	0	0	0	0	0	FBGN0038282	dpr9	2768670	FBgn0038282	dpr9	Human	257194	17302	NEGR1	1	0.9	low	Yes	No	eggNOG
437	FBgn0038282	dpr9	FastEpistasis	0	1	0	0	0	0	0	FBGN0038282	dpr9	2768670	FBgn0038282	dpr9	Human	89932	19262	PAPLN	1	0.9	low	Yes	No	eggNOG
437	FBgn0038282	dpr9	FastEpistasis	0	1	0	0	0	0	0	FBGN0038282	dpr9	2768670	FBgn0038282	dpr9	Human	57549	18132	IGSF9	1	0.9	low	Yes	No	eggNOG
437	FBgn0038282	dpr9	FastEpistasis	0	1	0	0	0	0	0	FBGN0038282	dpr9	2768670	FBgn0038282	dpr9	Human	374462	9679	PTPRQ	1	0.9	low	Yes	No	eggNOG
437	FBgn0038282	dpr9	FastEpistasis	0	1	0	0	0	0	0	FBGN0038282	dpr9	2768670	FBgn0038282	dpr9	Human	4978	8143	OPCML	1	0.9	low	Yes	No	eggNOG
437	FBgn0038282	dpr9	FastEpistasis	0	1	0	0	0	0	0	FBGN0038282	dpr9	2768670	FBgn0038282	dpr9	Human	4685	7657	NCAM2	1	0.9	low	Yes	No	eggNOG
437	FBgn0038282	dpr9	FastEpistasis	0	1	0	0	0	0	0	FBGN0038282	dpr9	2768670	FBgn0038282	dpr9	Human	26103	23404	LRIT1	1	0.9	low	Yes	Yes	eggNOG
437	FBgn0038282	dpr9	FastEpistasis	0	1	0	0	0	0	0	FBGN0038282	dpr9	2768670	FBgn0038282	dpr9	Human	4684	7656	NCAM1	1	0.9	low	Yes	No	eggNOG
437	FBgn0038282	dpr9	FastEpistasis	0	1	0	0	0	0	0	FBGN0038282	dpr9	2768670	FBgn0038282	dpr9	Human	22997	32326	IGSF9B	1	0.9	low	Yes	No	eggNOG
437	FBgn0038282	dpr9	FastEpistasis	0	1	0	0	0	0	0	FBGN0038282	dpr9	2768670	FBgn0038282	dpr9	Human	57453	14656	DSCAML1	1	0.9	low	Yes	No	eggNOG
437	FBgn0038282	dpr9	FastEpistasis	0	1	0	0	0	0	0	FBGN0038282	dpr9	2768670	FBgn0038282	dpr9	Human	4045	6705	LSAMP	1	0.9	low	Yes	No	eggNOG
437	FBgn0038282	dpr9	FastEpistasis	0	1	0	0	0	0	0	FBGN0038282	dpr9	2768670	FBgn0038282	dpr9	Human	84623	23204	KIRREL3	1	0.9	low	Yes	No	eggNOG
437	FBgn0038282	dpr9	FastEpistasis	0	1	0	0	0	0	0	FBGN0038282	dpr9	2768670	FBgn0038282	dpr9	Human	50863	17941	NTM	1	0.9	low	Yes	No	eggNOG
437	FBgn0038282	dpr9	FastEpistasis	0	1	0	0	0	0	0	FBGN0038282	dpr9	2768670	FBgn0038282	dpr9	Human	55243	15734	KIRREL1	1	0.9	low	Yes	No	eggNOG
443	FBgn0053100	4EHP	FastEpistasis	0	0	0	1	0	0	0	FBGN0053100	eIF4EHP	326255	FBgn0053100	eIF4EHP	Human	253314	33179	EIF4E1B	3	2.84	low	No	No	Compara, eggNOG, OrthoDB
443	FBgn0053100	4EHP	FastEpistasis	0	0	0	1	0	0	0	FBGN0053100	eIF4EHP	326255	FBgn0053100	eIF4EHP	Human	317649	31837	EIF4E3	3	2.84	low	No	No	Compara, eggNOG, OrthoDB
443	FBgn0053100	4EHP	FastEpistasis	0	0	0	1	0	0	0	FBGN0053100	eIF4EHP	326255	FBgn0053100	eIF4EHP	Human	1977	3287	EIF4E	3	2.84	low	No	No	Compara, eggNOG, OrthoDB
444	FBgn0011589	elk	FastEpistasis	0	0	0	0	0	1	0	FBGN0011589	Elk	37047	FBgn0011589	Elk	Human	90134	18863	KCNH7	3	2.84	low	No	No	Compara, eggNOG, OrthoDB
444	FBgn0011589	elk	FastEpistasis	0	0	0	0	0	1	0	FBGN0011589	Elk	37047	FBgn0011589	Elk	Human	3757	6251	KCNH2	3	2.84	low	No	No	Compara, eggNOG, OrthoDB
444	FBgn0011589	elk	FastEpistasis	0	0	0	0	0	1	0	FBGN0011589	Elk	37047	FBgn0011589	Elk	Human	81033	18862	KCNH6	2	1.91	low	No	No	eggNOG, OrthoDB
444	FBgn0011589	elk	FastEpistasis	0	0	0	0	0	1	0	FBGN0011589	Elk	37047	FBgn0011589	Elk	Human	10021	16882	HCN4	2	1.83	low	No	No	Compara, eggNOG
444	FBgn0011589	elk	FastEpistasis	0	0	0	0	0	1	0	FBGN0011589	Elk	37047	FBgn0011589	Elk	Human	348980	4845	HCN1	2	1.83	low	No	No	Compara, eggNOG
444	FBgn0011589	elk	FastEpistasis	0	0	0	0	0	1	0	FBGN0011589	Elk	37047	FBgn0011589	Elk	Human	57657	19183	HCN3	2	1.83	low	No	No	Compara, eggNOG
445	FBgn0037534	CG2781	FastEpistasis	0	0	0	0	0	1	0	FBGN0037534	CG2781	40943	FBgn0037534	ELOVL	Human	79071	15829	ELOVL6	2	1.91	low	No	No	eggNOG, OrthoDB
445	FBgn0037534	CG2781	FastEpistasis	0	0	0	0	0	1	0	FBGN0037534	CG2781	40943	FBgn0037534	ELOVL	Human	83401	18047	ELOVL3	2	1.91	low	No	No	eggNOG, OrthoDB
446	FBgn0264078	Flo-2	FastEpistasis	1	0	0	0	0	0	0	FBGN0264078	Flo2	32425	FBgn0264078	Flo2	Human	10211	3757	FLOT1	3	2.86	low	No	No	eggNOG, Isobase, OrthoDB
449	FBgn0036862	Gbs-76A	FastEpistasis	0	0	0	1	0	0	0	FBGN0036862	Gbs-76A	40102	FBgn0036862	Gbs-76A	Human	89801	14944	PPP1R3F	3	3.01	low	No	No	eggNOG, OrthoDB, Panther
458	FBgn0010114	hig	FastEpistasis	0	1	0	0	0	0	0	FBGN0010114	hig	35949	FBgn0010114	hig	Human	6402	10720	SELL	1	1.1	low	Yes	Yes	Panther
458	FBgn0010114	hig	FastEpistasis	0	1	0	0	0	0	0	FBGN0010114	hig	35949	FBgn0010114	hig	Human	6403	10721	SELP	1	1.1	low	Yes	No	Panther
458	FBgn0010114	hig	FastEpistasis	0	1	0	0	0	0	0	FBGN0010114	hig	35949	FBgn0010114	hig	Human	6401	10718	SELE	1	1.1	low	Yes	Yes	Panther
458	FBgn0010114	hig	FastEpistasis	0	1	0	0	0	0	0	FBGN0010114	hig	35949	FBgn0010114	hig	Human	79987	15985	SVEP1	1	1	low	Yes	No	OrthoFinder
458	FBgn0010114	hig	FastEpistasis	0	1	0	0	0	0	0	FBGN0010114	hig	35949	FBgn0010114	hig	Human	350	616	APOH	1	0.95	low	Yes	Yes	Isobase
466	FBgn0011603	ine	FastEpistasis	0	0	0	0	0	1	0	FBGN0011603	ine	33659	FBgn0011603	ine	Human	28968	13622	SLC6A16	3	2.84	low	No	No	Compara, eggNOG, OrthoDB
466	FBgn0011603	ine	FastEpistasis	0	0	0	0	0	1	0	FBGN0011603	ine	33659	FBgn0011603	ine	Human	6536	11056	SLC6A9	3	2.84	low	No	No	Compara, eggNOG, OrthoDB
466	FBgn0011603	ine	FastEpistasis	0	0	0	0	0	1	0	FBGN0011603	ine	33659	FBgn0011603	ine	Human	9152	11051	SLC6A5	3	2.84	low	No	No	Compara, eggNOG, OrthoDB
466	FBgn0011603	ine	FastEpistasis	0	0	0	0	0	1	0	FBGN0011603	ine	33659	FBgn0011603	ine	Human	6531	11049	SLC6A3	3	2.84	low	No	No	Compara, eggNOG, OrthoDB
466	FBgn0011603	ine	FastEpistasis	0	0	0	0	0	1	0	FBGN0011603	ine	33659	FBgn0011603	ine	Human	388662	31399	SLC6A17	3	2.84	low	No	No	Compara, eggNOG, OrthoDB
466	FBgn0011603	ine	FastEpistasis	0	0	0	0	0	1	0	FBGN0011603	ine	33659	FBgn0011603	ine	Human	6538	11044	SLC6A11	3	2.84	low	No	No	Compara, eggNOG, OrthoDB
466	FBgn0011603	ine	FastEpistasis	0	0	0	0	0	1	0	FBGN0011603	ine	33659	FBgn0011603	ine	Human	6534	11054	SLC6A7	3	2.84	low	No	No	Compara, eggNOG, OrthoDB
466	FBgn0011603	ine	FastEpistasis	0	0	0	0	0	1	0	FBGN0011603	ine	33659	FBgn0011603	ine	Human	6539	11045	SLC6A12	3	2.84	low	No	No	Compara, eggNOG, OrthoDB
466	FBgn0011603	ine	FastEpistasis	0	0	0	0	0	1	0	FBGN0011603	ine	33659	FBgn0011603	ine	Human	6532	11050	SLC6A4	3	2.84	low	No	No	Compara, eggNOG, OrthoDB
466	FBgn0011603	ine	FastEpistasis	0	0	0	0	0	1	0	FBGN0011603	ine	33659	FBgn0011603	ine	Human	11254	11047	SLC6A14	3	2.84	low	No	No	Compara, eggNOG, OrthoDB
466	FBgn0011603	ine	FastEpistasis	0	0	0	0	0	1	0	FBGN0011603	ine	33659	FBgn0011603	ine	Human	6529	11042	SLC6A1	3	2.84	low	No	No	Compara, eggNOG, OrthoDB
466	FBgn0011603	ine	FastEpistasis	0	0	0	0	0	1	0	FBGN0011603	ine	33659	FBgn0011603	ine	Human	55117	13621	SLC6A15	3	2.84	low	No	No	Compara, eggNOG, OrthoDB
466	FBgn0011603	ine	FastEpistasis	0	0	0	0	0	1	0	FBGN0011603	ine	33659	FBgn0011603	ine	Human	6530	11048	SLC6A2	3	2.84	low	No	No	Compara, eggNOG, OrthoDB
466	FBgn0011603	ine	FastEpistasis	0	0	0	0	0	1	0	FBGN0011603	ine	33659	FBgn0011603	ine	Human	348932	26441	SLC6A18	2	1.83	low	No	No	Compara, eggNOG
466	FBgn0011603	ine	FastEpistasis	0	0	0	0	0	1	0	FBGN0011603	ine	33659	FBgn0011603	ine	Human	54716	30927	SLC6A20	2	1.83	low	No	No	Compara, eggNOG
466	FBgn0011603	ine	FastEpistasis	0	0	0	0	0	1	0	FBGN0011603	ine	33659	FBgn0011603	ine	Human	340024	27960	SLC6A19	2	1.83	low	No	No	Compara, eggNOG
473	FBgn0010240	Lcch3	FastEpistasis	0	1	0	0	0	0	0	FBGN0010240	Lcch3	32554	FBgn0010240	Lcch3	Human	2568	4089	GABRP	3	3.01	low	No	No	eggNOG, OrthoDB, Panther
473	FBgn0010240	Lcch3	FastEpistasis	0	1	0	0	0	0	0	FBGN0010240	Lcch3	32554	FBgn0010240	Lcch3	Human	2570	4091	GABRR2	2	2	low	No	No	eggNOG, Panther
473	FBgn0010240	Lcch3	FastEpistasis	0	1	0	0	0	0	0	FBGN0010240	Lcch3	32554	FBgn0010240	Lcch3	Human	2569	4090	GABRR1	2	2	low	No	No	eggNOG, Panther
483	FBgn0028582	lqf	FastEpistasis	0	0	0	1	0	0	0	FBGN0028582	lqf	38846	FBgn0028582	lqf	Human	9685	23186	CLINT1	2	2.04	low	No	No	OrthoDB, RoundUp
484	FBgn0040765	luna	FastEpistasis	1	0	1	1	0	0	0	FBGN0040765	luna	2768719	FBgn0040765	luna	Human	11279	6351	KLF8	2	2.03	low	No	No	Compara, Panther
484	FBgn0040765	luna	FastEpistasis	1	0	1	1	0	0	0	FBGN0040765	luna	2768719	FBgn0040765	luna	Human	11278	6346	KLF12	2	2.03	low	No	No	Compara, Panther
484	FBgn0040765	luna	FastEpistasis	1	0	1	1	0	0	0	FBGN0040765	luna	2768719	FBgn0040765	luna	Human	128209	18830	KLF17	2	2.03	low	No	No	Compara, Panther
484	FBgn0040765	luna	FastEpistasis	1	0	1	1	0	0	0	FBGN0040765	luna	2768719	FBgn0040765	luna	Human	51274	16516	KLF3	2	2.03	low	No	No	Compara, Panther
485	FBgn0004797	mdy	FastEpistasis	0	0	1	0	0	0	0	FBGN0004797	mdy	44887	FBgn0004797	mdy	Human	6646	11177	SOAT1	3	2.94	low	No	No	eggNOG, OrthoDB, RoundUp
485	FBgn0004797	mdy	FastEpistasis	0	0	1	0	0	0	0	FBGN0004797	mdy	44887	FBgn0004797	mdy	Human	8435	11178	SOAT2	3	2.94	low	No	No	eggNOG, OrthoDB, RoundUp
486	FBgn0265140	Meltrin	FastEpistasis	0	0	0	0	0	0	1	FBGN0265140	Meltrin	3772109	FBgn0265140	Meltrin	Human	8748	199	ADAM20	3	3.01	low	No	No	eggNOG, OrthoDB, Panther
486	FBgn0265140	Meltrin	FastEpistasis	0	0	0	0	0	0	1	FBGN0265140	Meltrin	3772109	FBgn0265140	Meltrin	Human	203102	15479	ADAM32	3	3.01	low	No	No	eggNOG, OrthoDB, Panther
486	FBgn0265140	Meltrin	FastEpistasis	0	0	0	0	0	0	1	FBGN0265140	Meltrin	3772109	FBgn0265140	Meltrin	Human	11086	207	ADAM29	3	3.01	low	No	No	eggNOG, OrthoDB, Panther
486	FBgn0265140	Meltrin	FastEpistasis	0	0	0	0	0	0	1	FBGN0265140	Meltrin	3772109	FBgn0265140	Meltrin	Human	2515	198	ADAM2	3	3.01	low	No	No	eggNOG, OrthoDB, Panther
486	FBgn0265140	Meltrin	FastEpistasis	0	0	0	0	0	0	1	FBGN0265140	Meltrin	3772109	FBgn0265140	Meltrin	Human	8749	196	ADAM18	3	3.01	low	No	No	eggNOG, OrthoDB, Panther
486	FBgn0265140	Meltrin	FastEpistasis	0	0	0	0	0	0	1	FBGN0265140	Meltrin	3772109	FBgn0265140	Meltrin	Human	8747	200	ADAM21	3	3.01	low	No	No	eggNOG, OrthoDB, Panther
486	FBgn0265140	Meltrin	FastEpistasis	0	0	0	0	0	0	1	FBGN0265140	Meltrin	3772109	FBgn0265140	Meltrin	Human	8745	202	ADAM23	3	3.01	low	No	No	eggNOG, OrthoDB, Panther
486	FBgn0265140	Meltrin	FastEpistasis	0	0	0	0	0	0	1	FBGN0265140	Meltrin	3772109	FBgn0265140	Meltrin	Human	11085	208	ADAM30	3	3.01	low	No	No	eggNOG, OrthoDB, Panther
486	FBgn0265140	Meltrin	FastEpistasis	0	0	0	0	0	0	1	FBGN0265140	Meltrin	3772109	FBgn0265140	Meltrin	Human	6868	195	ADAM17	2	2.04	low	No	No	OrthoDB, RoundUp
487	FBgn0050272	CG30272	FastEpistasis	0	0	0	0	1	0	0	FBGN0050272	MFS1	246519	FBgn0050272	MFS1	Human	57084	16703	SLC17A6	3	2.91	low	No	No	eggNOG, OrthoDB, OrthoFinder
487	FBgn0050272	CG30272	FastEpistasis	0	0	0	0	1	0	0	FBGN0050272	MFS1	246519	FBgn0050272	MFS1	Human	63910	16192	SLC17A9	3	2.85	low	No	No	eggNOG, Isobase, OrthoFinder
488	FBgn0264695	Mhc	FastEpistasis	0	1	0	0	0	0	0	FBGN0264695	Mhc	35007	FBgn0264695	Mhc	Human	4627	7579	MYH9	3	2.8	low	No	No	eggNOG, OrthoFinder, orthoMCL
488	FBgn0264695	Mhc	FastEpistasis	0	1	0	0	0	0	0	FBGN0264695	Mhc	35007	FBgn0264695	Mhc	Human	4628	7568	MYH10	3	2.8	low	No	No	eggNOG, OrthoFinder, orthoMCL
488	FBgn0264695	Mhc	FastEpistasis	0	1	0	0	0	0	0	FBGN0264695	Mhc	35007	FBgn0264695	Mhc	Human	4629	7569	MYH11	3	2.8	low	No	No	eggNOG, OrthoFinder, orthoMCL
488	FBgn0264695	Mhc	FastEpistasis	0	1	0	0	0	0	0	FBGN0264695	Mhc	35007	FBgn0264695	Mhc	Human	79784	23212	MYH14	3	2.8	low	No	No	eggNOG, OrthoFinder, orthoMCL
488	FBgn0264695	Mhc	FastEpistasis	0	1	0	0	0	0	0	FBGN0264695	Mhc	35007	FBgn0264695	Mhc	Human	4645	7603	MYO5B	2	1.9	low	No	No	OrthoFinder, orthoMCL
488	FBgn0264695	Mhc	FastEpistasis	0	1	0	0	0	0	0	FBGN0264695	Mhc	35007	FBgn0264695	Mhc	Human	55930	7604	MYO5C	2	1.9	low	No	No	OrthoFinder, orthoMCL
488	FBgn0264695	Mhc	FastEpistasis	0	1	0	0	0	0	0	FBGN0264695	Mhc	35007	FBgn0264695	Mhc	Human	4644	7602	MYO5A	2	1.9	low	No	No	OrthoFinder, orthoMCL
489	FBgn0011661	Moe	FastEpistasis	0	0	0	0	1	0	0	FBGN0011661	Moe	31816	FBgn0011661	Moe	Human	4771	7773	NF2	2	1.91	low	No	No	eggNOG, OrthoDB
491	FBgn0038642	Muc91C	FastEpistasis	0	0	0	0	0	1	0	FBGN0038642	Muc91C	42246	FBgn0038642	Muc91C	Human	4582	7508	MUC1	1	1.01	low	Yes	No	OMA
491	FBgn0038642	Muc91C	FastEpistasis	0	0	0	0	0	1	0	FBGN0038642	Muc91C	42246	FBgn0038642	Muc91C	Human	100101267	34005	POM121C	1	1.01	low	Yes	No	OMA
491	FBgn0038642	Muc91C	FastEpistasis	0	0	0	0	0	1	0	FBGN0038642	Muc91C	42246	FBgn0038642	Muc91C	Human	57055	15964	DAZ2	1	0.91	low	Yes	No	Phylome
491	FBgn0038642	Muc91C	FastEpistasis	0	0	0	0	0	1	0	FBGN0038642	Muc91C	42246	FBgn0038642	Muc91C	Human	1297	2217	COL9A1	1	0.91	low	Yes	Yes	Phylome
492	FBgn0266347	nAcRalpha-80B	FastEpistasis	0	0	1	0	0	0	0	FBGN0266347	nAChRalpha4	40521	FBgn0266347	nAChRalpha4	Human	1141	1962	CHRNB2	3	3.01	low	No	No	eggNOG, OrthoDB, Panther
492	FBgn0266347	nAcRalpha-80B	FastEpistasis	0	0	1	0	0	0	0	FBGN0266347	nAChRalpha4	40521	FBgn0266347	nAChRalpha4	Human	1134	1955	CHRNA1	3	3.01	low	No	No	eggNOG, OrthoDB, Panther
492	FBgn0266347	nAcRalpha-80B	FastEpistasis	0	0	1	0	0	0	0	FBGN0266347	nAChRalpha4	40521	FBgn0266347	nAChRalpha4	Human	1138	1959	CHRNA5	3	3.01	low	No	No	eggNOG, OrthoDB, Panther
492	FBgn0266347	nAcRalpha-80B	FastEpistasis	0	0	1	0	0	0	0	FBGN0266347	nAChRalpha4	40521	FBgn0266347	nAChRalpha4	Human	1142	1963	CHRNB3	3	3.01	low	No	No	eggNOG, OrthoDB, Panther
492	FBgn0266347	nAcRalpha-80B	FastEpistasis	0	0	1	0	0	0	0	FBGN0266347	nAChRalpha4	40521	FBgn0266347	nAChRalpha4	Human	1143	1964	CHRNB4	3	3.01	low	No	No	eggNOG, OrthoDB, Panther
492	FBgn0266347	nAcRalpha-80B	FastEpistasis	0	0	1	0	0	0	0	FBGN0266347	nAChRalpha4	40521	FBgn0266347	nAChRalpha4	Human	1144	1965	CHRND	2	2	low	No	No	eggNOG, Panther
492	FBgn0266347	nAcRalpha-80B	FastEpistasis	0	0	1	0	0	0	0	FBGN0266347	nAChRalpha4	40521	FBgn0266347	nAChRalpha4	Human	1140	1961	CHRNB1	2	2	low	No	No	eggNOG, Panther
492	FBgn0266347	nAcRalpha-80B	FastEpistasis	0	0	1	0	0	0	0	FBGN0266347	nAChRalpha4	40521	FBgn0266347	nAChRalpha4	Human	1146	1967	CHRNG	2	2	low	No	No	eggNOG, Panther
492	FBgn0266347	nAcRalpha-80B	FastEpistasis	0	0	1	0	0	0	0	FBGN0266347	nAChRalpha4	40521	FBgn0266347	nAChRalpha4	Human	1145	1966	CHRNE	2	2	low	No	No	eggNOG, Panther
499	FBgn0262509	nrm	FastEpistasis	0	1	0	0	0	0	0	FBGN0262509	nrm	40515	FBgn0262509	nrm	Human	84033	15719	OBSCN	1	1.1	low	Yes	No	Panther
499	FBgn0262509	nrm	FastEpistasis	0	1	0	0	0	0	0	FBGN0262509	nrm	40515	FBgn0262509	nrm	Human	3503	5528	IGHG4	1	0.91	low	Yes	Yes	Phylome
499	FBgn0262509	nrm	FastEpistasis	0	1	0	0	0	0	0	FBGN0262509	nrm	40515	FBgn0262509	nrm	Human	80381	19137	CD276	1	0.91	low	Yes	Yes	Phylome
499	FBgn0262509	nrm	FastEpistasis	0	1	0	0	0	0	0	FBGN0262509	nrm	40515	FBgn0262509	nrm	Human	10326	15928	SIRPB1	1	0.91	low	Yes	Yes	Phylome
499	FBgn0262509	nrm	FastEpistasis	0	1	0	0	0	0	0	FBGN0262509	nrm	40515	FBgn0262509	nrm	Human	56253	24313	CRTAM	1	0.91	low	Yes	Yes	Phylome
499	FBgn0262509	nrm	FastEpistasis	0	1	0	0	0	0	0	FBGN0262509	nrm	40515	FBgn0262509	nrm	Human	253012	27364	HEPACAM2	1	0.91	low	Yes	Yes	Phylome
499	FBgn0262509	nrm	FastEpistasis	0	1	0	0	0	0	0	FBGN0262509	nrm	40515	FBgn0262509	nrm	Human	55423	15757	SIRPG	1	0.91	low	Yes	Yes	Phylome
499	FBgn0262509	nrm	FastEpistasis	0	1	0	0	0	0	0	FBGN0262509	nrm	40515	FBgn0262509	nrm	Human	140885	9662	SIRPA	1	0.91	low	Yes	Yes	Phylome
499	FBgn0262509	nrm	FastEpistasis	0	1	0	0	0	0	0	FBGN0262509	nrm	40515	FBgn0262509	nrm	Human	4868	7908	NPHS1	1	0.9	low	Yes	No	eggNOG
504	FBgn0085370	Pde11	FastEpistasis	0	0	0	0	0	1	0	FBGN0085370	Pde11	35107	FBgn0085370	Pde11	Human	5141	8780	PDE4A	3	2.84	low	No	No	Compara, eggNOG, OrthoDB
504	FBgn0085370	Pde11	FastEpistasis	0	0	0	0	0	1	0	FBGN0085370	Pde11	35107	FBgn0085370	Pde11	Human	5144	8783	PDE4D	3	2.84	low	No	No	Compara, eggNOG, OrthoDB
504	FBgn0085370	Pde11	FastEpistasis	0	0	0	0	0	1	0	FBGN0085370	Pde11	35107	FBgn0085370	Pde11	Human	5153	8775	PDE1B	2	1.94	low	No	No	Compara, OrthoDB
504	FBgn0085370	Pde11	FastEpistasis	0	0	0	0	0	1	0	FBGN0085370	Pde11	35107	FBgn0085370	Pde11	Human	5151	8793	PDE8A	2	1.94	low	No	No	Compara, OrthoDB
504	FBgn0085370	Pde11	FastEpistasis	0	0	0	0	0	1	0	FBGN0085370	Pde11	35107	FBgn0085370	Pde11	Human	8622	8794	PDE8B	2	1.94	low	No	No	Compara, OrthoDB
504	FBgn0085370	Pde11	FastEpistasis	0	0	0	0	0	1	0	FBGN0085370	Pde11	35107	FBgn0085370	Pde11	Human	5142	8781	PDE4B	2	1.91	low	No	No	eggNOG, OrthoDB
504	FBgn0085370	Pde11	FastEpistasis	0	0	0	0	0	1	0	FBGN0085370	Pde11	35107	FBgn0085370	Pde11	Human	5143	8782	PDE4C	2	1.91	low	No	No	eggNOG, OrthoDB
504	FBgn0085370	Pde11	FastEpistasis	0	0	0	0	0	1	0	FBGN0085370	Pde11	35107	FBgn0085370	Pde11	Human	5152	8795	PDE9A	2	1.91	low	No	No	eggNOG, OrthoDB
506	FBgn0259171	Pde9	FastEpistasis	0	0	0	0	0	0	1	FBGN0259171	Pde9	32233	FBgn0259171	Pde9	Human	5141	8780	PDE4A	3	2.91	low	No	No	eggNOG, OrthoDB, OrthoFinder
506	FBgn0259171	Pde9	FastEpistasis	0	0	0	0	0	0	1	FBGN0259171	Pde9	32233	FBgn0259171	Pde9	Human	5142	8781	PDE4B	3	2.91	low	No	No	eggNOG, OrthoDB, OrthoFinder
506	FBgn0259171	Pde9	FastEpistasis	0	0	0	0	0	0	1	FBGN0259171	Pde9	32233	FBgn0259171	Pde9	Human	5143	8782	PDE4C	3	2.91	low	No	No	eggNOG, OrthoDB, OrthoFinder
506	FBgn0259171	Pde9	FastEpistasis	0	0	0	0	0	0	1	FBGN0259171	Pde9	32233	FBgn0259171	Pde9	Human	5144	8783	PDE4D	3	2.91	low	No	No	eggNOG, OrthoDB, OrthoFinder
506	FBgn0259171	Pde9	FastEpistasis	0	0	0	0	0	0	1	FBGN0259171	Pde9	32233	FBgn0259171	Pde9	Human	50940	8773	PDE11A	3	2.84	low	No	No	Compara, eggNOG, OrthoDB
506	FBgn0259171	Pde9	FastEpistasis	0	0	0	0	0	0	1	FBGN0259171	Pde9	32233	FBgn0259171	Pde9	Human	5151	8793	PDE8A	2	2.04	low	No	No	OrthoDB, RoundUp
506	FBgn0259171	Pde9	FastEpistasis	0	0	0	0	0	0	1	FBGN0259171	Pde9	32233	FBgn0259171	Pde9	Human	8622	8794	PDE8B	2	2.04	low	No	No	OrthoDB, RoundUp
506	FBgn0259171	Pde9	FastEpistasis	0	0	0	0	0	0	1	FBGN0259171	Pde9	32233	FBgn0259171	Pde9	Human	8654	8784	PDE5A	2	1.91	low	No	No	eggNOG, OrthoDB
506	FBgn0259171	Pde9	FastEpistasis	0	0	0	0	0	0	1	FBGN0259171	Pde9	32233	FBgn0259171	Pde9	Human	27115	8792	PDE7B	2	1.91	low	No	No	eggNOG, OrthoDB
506	FBgn0259171	Pde9	FastEpistasis	0	0	0	0	0	0	1	FBGN0259171	Pde9	32233	FBgn0259171	Pde9	Human	5138	8777	PDE2A	2	1.91	low	No	No	eggNOG, OrthoDB
506	FBgn0259171	Pde9	FastEpistasis	0	0	0	0	0	0	1	FBGN0259171	Pde9	32233	FBgn0259171	Pde9	Human	5146	8787	PDE6C	2	1.91	low	No	No	eggNOG, OrthoDB
506	FBgn0259171	Pde9	FastEpistasis	0	0	0	0	0	0	1	FBGN0259171	Pde9	32233	FBgn0259171	Pde9	Human	5145	8785	PDE6A	2	1.91	low	No	No	eggNOG, OrthoDB
506	FBgn0259171	Pde9	FastEpistasis	0	0	0	0	0	0	1	FBGN0259171	Pde9	32233	FBgn0259171	Pde9	Human	10846	8772	PDE10A	2	1.91	low	No	No	eggNOG, OrthoDB
506	FBgn0259171	Pde9	FastEpistasis	0	0	0	0	0	0	1	FBGN0259171	Pde9	32233	FBgn0259171	Pde9	Human	5150	8791	PDE7A	2	1.91	low	No	No	eggNOG, OrthoDB
506	FBgn0259171	Pde9	FastEpistasis	0	0	0	0	0	0	1	FBGN0259171	Pde9	32233	FBgn0259171	Pde9	Human	5158	8786	PDE6B	2	1.91	low	No	No	eggNOG, OrthoDB
509	FBgn0003091	Pkc53E	FastEpistasis	1	0	0	0	0	0	0	FBGN0003091	Pkc53E	48311	FBgn0003091	Pkc53E	Human	5581	9401	PRKCE	3	2.96	low	No	No	Compara, OrthoFinder, RoundUp
509	FBgn0003091	Pkc53E	FastEpistasis	1	0	0	0	0	0	0	FBGN0003091	Pkc53E	48311	FBgn0003091	Pkc53E	Human	5583	9403	PRKCH	3	2.96	low	No	No	Compara, OrthoFinder, RoundUp
509	FBgn0003091	Pkc53E	FastEpistasis	1	0	0	0	0	0	0	FBGN0003091	Pkc53E	48311	FBgn0003091	Pkc53E	Human	5584	9404	PRKCI	3	2.94	low	No	No	Compara, OrthoDB, OrthoFinder
509	FBgn0003091	Pkc53E	FastEpistasis	1	0	0	0	0	0	0	FBGN0003091	Pkc53E	48311	FBgn0003091	Pkc53E	Human	5590	9412	PRKCZ	3	2.94	low	No	No	Compara, OrthoDB, OrthoFinder
509	FBgn0003091	Pkc53E	FastEpistasis	1	0	0	0	0	0	0	FBGN0003091	Pkc53E	48311	FBgn0003091	Pkc53E	Human	5588	9410	PRKCQ	2	2.03	low	No	No	OrthoFinder, RoundUp
509	FBgn0003091	Pkc53E	FastEpistasis	1	0	0	0	0	0	0	FBGN0003091	Pkc53E	48311	FBgn0003091	Pkc53E	Human	5580	9399	PRKCD	2	2.03	low	No	No	OrthoFinder, RoundUp
509	FBgn0003091	Pkc53E	FastEpistasis	1	0	0	0	0	0	0	FBGN0003091	Pkc53E	48311	FBgn0003091	Pkc53E	Human	207	391	AKT1	2	2.01	low	No	No	OrthoDB, OrthoFinder
509	FBgn0003091	Pkc53E	FastEpistasis	1	0	0	0	0	0	0	FBGN0003091	Pkc53E	48311	FBgn0003091	Pkc53E	Human	208	392	AKT2	2	2.01	low	No	No	OrthoDB, OrthoFinder
509	FBgn0003091	Pkc53E	FastEpistasis	1	0	0	0	0	0	0	FBGN0003091	Pkc53E	48311	FBgn0003091	Pkc53E	Human	10110	13900	SGK2	2	2.01	low	No	No	OrthoDB, OrthoFinder
509	FBgn0003091	Pkc53E	FastEpistasis	1	0	0	0	0	0	0	FBGN0003091	Pkc53E	48311	FBgn0003091	Pkc53E	Human	10000	393	AKT3	2	2.01	low	No	No	OrthoDB, OrthoFinder
509	FBgn0003091	Pkc53E	FastEpistasis	1	0	0	0	0	0	0	FBGN0003091	Pkc53E	48311	FBgn0003091	Pkc53E	Human	6446	10810	SGK1	2	2.01	low	No	No	OrthoDB, OrthoFinder
509	FBgn0003091	Pkc53E	FastEpistasis	1	0	0	0	0	0	0	FBGN0003091	Pkc53E	48311	FBgn0003091	Pkc53E	Human	5585	9405	PKN1	2	1.96	low	No	No	Compara, RoundUp
509	FBgn0003091	Pkc53E	FastEpistasis	1	0	0	0	0	0	0	FBGN0003091	Pkc53E	48311	FBgn0003091	Pkc53E	Human	5586	9406	PKN2	2	1.96	low	No	No	Compara, RoundUp
509	FBgn0003091	Pkc53E	FastEpistasis	1	0	0	0	0	0	0	FBGN0003091	Pkc53E	48311	FBgn0003091	Pkc53E	Human	29941	17999	PKN3	2	1.96	low	No	No	Compara, RoundUp
510	FBgn0003093	Pkc98E	FastEpistasis	0	0	1	0	0	0	0	FBGN0003093	Pkc98E	43428	FBgn0003093	Pkc98E	Human	5578	9393	PRKCA	2	2.03	low	No	No	OrthoFinder, RoundUp
510	FBgn0003093	Pkc98E	FastEpistasis	0	0	1	0	0	0	0	FBGN0003093	Pkc98E	43428	FBgn0003093	Pkc98E	Human	5579	9395	PRKCB	2	2.03	low	No	No	OrthoFinder, RoundUp
510	FBgn0003093	Pkc98E	FastEpistasis	0	0	1	0	0	0	0	FBGN0003093	Pkc98E	43428	FBgn0003093	Pkc98E	Human	5585	9405	PKN1	2	1.93	low	No	No	eggNOG, RoundUp
510	FBgn0003093	Pkc98E	FastEpistasis	0	0	1	0	0	0	0	FBGN0003093	Pkc98E	43428	FBgn0003093	Pkc98E	Human	5586	9406	PKN2	2	1.93	low	No	No	eggNOG, RoundUp
510	FBgn0003093	Pkc98E	FastEpistasis	0	0	1	0	0	0	0	FBGN0003093	Pkc98E	43428	FBgn0003093	Pkc98E	Human	29941	17999	PKN3	2	1.93	low	No	No	eggNOG, RoundUp
511	FBgn0003118	pnt	FastEpistasis	0	0	0	0	1	0	0	FBGN0003118	pnt	42757	FBgn0003118	pnt	Human	2116	3491	ETV2	2	2	low	No	No	eggNOG, Panther
513	FBgn0052792	CG32792	FastEpistasis	1	0	0	0	0	0	0	FBGN0052792	ppk8	318213	FBgn0052792	ppk8	Human	6340	10602	SCNN1G	3	2.84	low	No	No	Compara, eggNOG, OrthoDB
514	FBgn0028622	qsm	FastEpistasis	0	0	0	0	0	1	0	FBGN0028622	qsm	47065	FBgn0028622	qsm	Human	170392	29953	OIT3	1	1	low	Yes	Yes	Hieranoid
515	FBgn0031814	retm	FastEpistasis	0	0	0	0	1	0	0	FBGN0031814	retm	33899	FBgn0031814	retm	Human	730005	40047	SEC14L6	3	2.84	low	No	No	Compara, eggNOG, OrthoDB
515	FBgn0031814	retm	FastEpistasis	0	0	0	0	1	0	0	FBGN0031814	retm	33899	FBgn0031814	retm	Human	284904	20627	SEC14L4	3	2.84	low	No	No	Compara, eggNOG, OrthoDB
515	FBgn0031814	retm	FastEpistasis	0	0	0	0	1	0	0	FBGN0031814	retm	33899	FBgn0031814	retm	Human	6017	10024	RLBP1	2	1.91	low	No	No	eggNOG, OrthoDB
516	FBgn0085426	Rgk3	FastEpistasis	0	0	0	0	0	1	0	FBGN0085426	Rgk3	5740446	FBgn0085426	Rgk3	Human	28954	15922	REM1	3	3.02	low	No	No	OrthoDB, Panther, Phylome
516	FBgn0085426	Rgk3	FastEpistasis	0	0	0	0	0	1	0	FBGN0085426	Rgk3	5740446	FBgn0085426	Rgk3	Human	2669	4234	GEM	3	3.02	low	No	No	OrthoDB, Panther, Phylome
516	FBgn0085426	Rgk3	FastEpistasis	0	0	0	0	0	1	0	FBGN0085426	Rgk3	5740446	FBgn0085426	Rgk3	Human	161253	20248	REM2	3	3.02	low	No	No	OrthoDB, Panther, Phylome
517	FBgn0032415	rho-6	FastEpistasis	0	0	1	0	0	0	0	FBGN0032415	rho-6	34640	FBgn0032415	rho-6	Human	54933	16083	RHBDL2	3	3.01	low	No	No	eggNOG, OrthoDB, Panther
517	FBgn0032415	rho-6	FastEpistasis	0	0	1	0	0	0	0	FBGN0032415	rho-6	34640	FBgn0032415	rho-6	Human	64285	20561	RHBDF1	3	2.86	low	No	No	eggNOG, Isobase, OrthoDB
519	FBgn0083940	CG34104	FastEpistasis	0	0	0	0	0	1	0	FBGN0083940	RhoU	31945	FBgn0083940	RhoU	Human	391	672	RHOG	2	1.91	low	No	No	eggNOG, OrthoDB
519	FBgn0083940	CG34104	FastEpistasis	0	0	0	0	0	1	0	FBGN0083940	RhoU	31945	FBgn0083940	RhoU	Human	23433	17736	RHOQ	2	1.91	low	No	No	eggNOG, OrthoDB
519	FBgn0083940	CG34104	FastEpistasis	0	0	0	0	0	1	0	FBGN0083940	RhoU	31945	FBgn0083940	RhoU	Human	5879	9801	RAC1	2	1.91	low	No	No	eggNOG, OrthoDB
519	FBgn0083940	CG34104	FastEpistasis	0	0	0	0	0	1	0	FBGN0083940	RhoU	31945	FBgn0083940	RhoU	Human	5881	9803	RAC3	2	1.91	low	No	No	eggNOG, OrthoDB
519	FBgn0083940	CG34104	FastEpistasis	0	0	0	0	0	1	0	FBGN0083940	RhoU	31945	FBgn0083940	RhoU	Human	5880	9802	RAC2	2	1.91	low	No	No	eggNOG, OrthoDB
519	FBgn0083940	CG34104	FastEpistasis	0	0	0	0	0	1	0	FBGN0083940	RhoU	31945	FBgn0083940	RhoU	Human	998	1736	CDC42	2	1.91	low	No	No	eggNOG, OrthoDB
519	FBgn0083940	CG34104	FastEpistasis	0	0	0	0	0	1	0	FBGN0083940	RhoU	31945	FBgn0083940	RhoU	Human	57381	688	RHOJ	2	1.91	low	No	No	eggNOG, OrthoDB
522	FBgn0002306	sas	FastEpistasis	0	1	0	0	0	0	0	FBGN0002306	sas	40861	FBgn0002306	sas	Human	8840	12769	CCN4	1	1.1	low	Yes	No	Panther
522	FBgn0002306	sas	FastEpistasis	0	1	0	0	0	0	0	FBGN0002306	sas	40861	FBgn0002306	sas	Human	4856	7885	CCN3	1	1.1	low	Yes	No	Panther
522	FBgn0002306	sas	FastEpistasis	0	1	0	0	0	0	0	FBGN0002306	sas	40861	FBgn0002306	sas	Human	1490	2500	CCN2	1	1.1	low	Yes	No	Panther
522	FBgn0002306	sas	FastEpistasis	0	1	0	0	0	0	0	FBGN0002306	sas	40861	FBgn0002306	sas	Human	3491	2654	CCN1	1	1.1	low	Yes	No	Panther
522	FBgn0002306	sas	FastEpistasis	0	1	0	0	0	0	0	FBGN0002306	sas	40861	FBgn0002306	sas	Human	8838	12771	CCN6	1	1.1	low	Yes	No	Panther
522	FBgn0002306	sas	FastEpistasis	0	1	0	0	0	0	0	FBGN0002306	sas	40861	FBgn0002306	sas	Human	8839	12770	CCN5	1	1.1	low	Yes	No	Panther
523	FBgn0052103	CG32103	FastEpistasis	0	1	0	0	0	0	0	FBGN0052103	CG32103	39415	FBgn0052103	SCaMC	Human	8034	10986	SLC25A16	2	2.03	low	No	No	OrthoFinder, RoundUp
523	FBgn0052103	CG32103	FastEpistasis	0	1	0	0	0	0	0	FBGN0052103	CG32103	39415	FBgn0052103	SCaMC	Human	284439	28380	SLC25A42	2	2.03	low	No	No	OrthoFinder, RoundUp
525	FBgn0021764	sdk	FastEpistasis	0	0	0	1	0	0	1	FBGN0021764	sdk	31017	FBgn0021764	sdk	Human	1826	3039	DSCAM	2	1.86	low	No	No	eggNOG, TreeFam
525	FBgn0021764	sdk	FastEpistasis	0	0	0	1	0	0	1	FBGN0021764	sdk	31017	FBgn0021764	sdk	Human	57453	14656	DSCAML1	2	1.86	low	No	No	eggNOG, TreeFam
527	FBgn0003386	Shaw	FastEpistasis	0	0	0	0	1	0	0	FBGN0003386	Shaw	33599	FBgn0003386	Shaw	Human	27012	18861	KCNV1	2	1.91	low	No	No	eggNOG, OrthoDB
527	FBgn0003386	Shaw	FastEpistasis	0	0	0	0	1	0	0	FBGN0003386	Shaw	33599	FBgn0003386	Shaw	Human	3754	6246	KCNF1	2	1.91	low	No	No	eggNOG, OrthoDB
527	FBgn0003386	Shaw	FastEpistasis	0	0	0	0	1	0	0	FBGN0003386	Shaw	33599	FBgn0003386	Shaw	Human	3790	6302	KCNS3	2	1.91	low	No	No	eggNOG, OrthoDB
527	FBgn0003386	Shaw	FastEpistasis	0	0	0	0	1	0	0	FBGN0003386	Shaw	33599	FBgn0003386	Shaw	Human	3743	6226	KCNA7	2	1.91	low	No	No	eggNOG, OrthoDB
527	FBgn0003386	Shaw	FastEpistasis	0	0	0	0	1	0	0	FBGN0003386	Shaw	33599	FBgn0003386	Shaw	Human	3787	6300	KCNS1	2	1.91	low	No	No	eggNOG, OrthoDB
527	FBgn0003386	Shaw	FastEpistasis	0	0	0	0	1	0	0	FBGN0003386	Shaw	33599	FBgn0003386	Shaw	Human	26251	6249	KCNG2	2	1.91	low	No	No	eggNOG, OrthoDB
527	FBgn0003386	Shaw	FastEpistasis	0	0	0	0	1	0	0	FBGN0003386	Shaw	33599	FBgn0003386	Shaw	Human	170850	18306	KCNG3	2	1.91	low	No	No	eggNOG, OrthoDB
527	FBgn0003386	Shaw	FastEpistasis	0	0	0	0	1	0	0	FBGN0003386	Shaw	33599	FBgn0003386	Shaw	Human	169522	19698	KCNV2	2	1.91	low	No	No	eggNOG, OrthoDB
527	FBgn0003386	Shaw	FastEpistasis	0	0	0	0	1	0	0	FBGN0003386	Shaw	33599	FBgn0003386	Shaw	Human	3788	6301	KCNS2	2	1.91	low	No	No	eggNOG, OrthoDB
529	FBgn0086604	CG12484	FastEpistasis	1	0	0	0	0	0	0	FBGN0086604	side-VIII	37310	FBgn0086604	side-VIII	Human	10461	7027	MERTK	1	0.91	low	Yes	Yes	Phylome
529	FBgn0086604	CG12484	FastEpistasis	1	0	0	0	0	0	0	FBGN0086604	side-VIII	37310	FBgn0086604	side-VIII	Human	4868	7908	NPHS1	1	0.9	low	Yes	No	eggNOG
530	FBgn0262103	Sik3	FastEpistasis	0	0	1	0	0	0	0	FBGN0262103	Sik3	37152	FBgn0262103	Sik3	Human	57787	13538	MARK4	2	1.93	low	No	No	eggNOG, RoundUp
530	FBgn0262103	Sik3	FastEpistasis	0	0	1	0	0	0	0	FBGN0262103	Sik3	37152	FBgn0262103	Sik3	Human	4140	6897	MARK3	2	1.93	low	No	No	eggNOG, RoundUp
530	FBgn0262103	Sik3	FastEpistasis	0	0	1	0	0	0	0	FBGN0262103	Sik3	37152	FBgn0262103	Sik3	Human	2011	3332	MARK2	2	1.93	low	No	No	eggNOG, RoundUp
532	FBgn0037203	slif	FastEpistasis	0	0	0	0	0	1	0	FBGN0037203	slif	40510	FBgn0037203	slif	Human	9056	11065	SLC7A7	2	1.83	low	No	No	Compara, eggNOG
532	FBgn0037203	slif	FastEpistasis	0	0	0	0	0	1	0	FBGN0037203	slif	40510	FBgn0037203	slif	Human	9057	11064	SLC7A6	2	1.83	low	No	No	Compara, eggNOG
532	FBgn0037203	slif	FastEpistasis	0	0	0	0	0	1	0	FBGN0037203	slif	40510	FBgn0037203	slif	Human	23657	11059	SLC7A11	2	1.83	low	No	No	Compara, eggNOG
532	FBgn0037203	slif	FastEpistasis	0	0	0	0	0	1	0	FBGN0037203	slif	40510	FBgn0037203	slif	Human	11136	11067	SLC7A9	2	1.83	low	No	No	Compara, eggNOG
532	FBgn0037203	slif	FastEpistasis	0	0	0	0	0	1	0	FBGN0037203	slif	40510	FBgn0037203	slif	Human	8140	11063	SLC7A5	2	1.83	low	No	No	Compara, eggNOG
532	FBgn0037203	slif	FastEpistasis	0	0	0	0	0	1	0	FBGN0037203	slif	40510	FBgn0037203	slif	Human	157724	23092	SLC7A13	2	1.83	low	No	No	Compara, eggNOG
532	FBgn0037203	slif	FastEpistasis	0	0	0	0	0	1	0	FBGN0037203	slif	40510	FBgn0037203	slif	Human	56301	11058	SLC7A10	2	1.83	low	No	No	Compara, eggNOG
532	FBgn0037203	slif	FastEpistasis	0	0	0	0	0	1	0	FBGN0037203	slif	40510	FBgn0037203	slif	Human	23428	11066	SLC7A8	2	1.83	low	No	No	Compara, eggNOG
533	FBgn0086906	sls	FastEpistasis	0	0	1	0	0	0	0	FBGN0086906	sls	44013	FBgn0086906	sls	Human	7273	12403	TTN	2	1.8	low	No	No	eggNOG, orthoMCL
533	FBgn0086906	sls	FastEpistasis	0	0	1	0	0	0	0	FBGN0086906	sls	44013	FBgn0086906	sls	Human	10290	16901	SPEG	2	1.8	low	No	No	eggNOG, orthoMCL
533	FBgn0086906	sls	FastEpistasis	0	0	1	0	0	0	0	FBGN0086906	sls	44013	FBgn0086906	sls	Human	256158	21293	HMCN2	2	1.8	low	No	No	eggNOG, orthoMCL
537	FBgn0042630	Sox21b	FastEpistasis	0	1	0	0	0	0	0	FBGN0042630	Sox21b	39569	FBgn0042630	Sox21b	Human	6665	11196	SOX15	3	3	low	No	No	eggNOG, OrthoFinder, Panther
537	FBgn0042630	Sox21b	FastEpistasis	0	1	0	0	0	0	0	FBGN0042630	Sox21b	39569	FBgn0042630	Sox21b	Human	6736	11311	SRY	2	2.1	low	No	No	OrthoFinder, Panther
537	FBgn0042630	Sox21b	FastEpistasis	0	1	0	0	0	0	0	FBGN0042630	Sox21b	39569	FBgn0042630	Sox21b	Human	6664	11191	SOX11	2	2	low	No	No	eggNOG, Panther
543	FBgn0033652	ths	FastEpistasis	0	0	1	0	0	0	0	FBGN0033652	ths	36258	FBgn0033652	ths	Human	2254	3687	FGF9	1	0.9	low	Yes	No	eggNOG
543	FBgn0033652	ths	FastEpistasis	0	0	1	0	0	0	0	FBGN0033652	ths	36258	FBgn0033652	ths	Human	2258	3670	FGF13	1	0.9	low	Yes	No	eggNOG
543	FBgn0033652	ths	FastEpistasis	0	0	1	0	0	0	0	FBGN0033652	ths	36258	FBgn0033652	ths	Human	2255	3666	FGF10	1	0.9	low	Yes	No	eggNOG
543	FBgn0033652	ths	FastEpistasis	0	0	1	0	0	0	0	FBGN0033652	ths	36258	FBgn0033652	ths	Human	2247	3676	FGF2	1	0.9	low	Yes	No	eggNOG
543	FBgn0033652	ths	FastEpistasis	0	0	1	0	0	0	0	FBGN0033652	ths	36258	FBgn0033652	ths	Human	2249	3682	FGF4	1	0.9	low	Yes	No	eggNOG
543	FBgn0033652	ths	FastEpistasis	0	0	1	0	0	0	0	FBGN0033652	ths	36258	FBgn0033652	ths	Human	2251	3684	FGF6	1	0.9	low	Yes	No	eggNOG
543	FBgn0033652	ths	FastEpistasis	0	0	1	0	0	0	0	FBGN0033652	ths	36258	FBgn0033652	ths	Human	27006	3679	FGF22	1	0.9	low	Yes	No	eggNOG
543	FBgn0033652	ths	FastEpistasis	0	0	1	0	0	0	0	FBGN0033652	ths	36258	FBgn0033652	ths	Human	2257	3668	FGF12	1	0.9	low	Yes	No	eggNOG
543	FBgn0033652	ths	FastEpistasis	0	0	1	0	0	0	0	FBGN0033652	ths	36258	FBgn0033652	ths	Human	26291	3678	FGF21	1	0.9	low	Yes	No	eggNOG
543	FBgn0033652	ths	FastEpistasis	0	0	1	0	0	0	0	FBGN0033652	ths	36258	FBgn0033652	ths	Human	8822	3673	FGF17	1	0.9	low	Yes	No	eggNOG
543	FBgn0033652	ths	FastEpistasis	0	0	1	0	0	0	0	FBGN0033652	ths	36258	FBgn0033652	ths	Human	2250	3683	FGF5	1	0.9	low	Yes	No	eggNOG
543	FBgn0033652	ths	FastEpistasis	0	0	1	0	0	0	0	FBGN0033652	ths	36258	FBgn0033652	ths	Human	9965	3675	FGF19	1	0.9	low	Yes	No	eggNOG
543	FBgn0033652	ths	FastEpistasis	0	0	1	0	0	0	0	FBGN0033652	ths	36258	FBgn0033652	ths	Human	8823	3672	FGF16	1	0.9	low	Yes	No	eggNOG
543	FBgn0033652	ths	FastEpistasis	0	0	1	0	0	0	0	FBGN0033652	ths	36258	FBgn0033652	ths	Human	2248	3681	FGF3	1	0.9	low	Yes	No	eggNOG
543	FBgn0033652	ths	FastEpistasis	0	0	1	0	0	0	0	FBGN0033652	ths	36258	FBgn0033652	ths	Human	2246	3665	FGF1	1	0.9	low	Yes	No	eggNOG
543	FBgn0033652	ths	FastEpistasis	0	0	1	0	0	0	0	FBGN0033652	ths	36258	FBgn0033652	ths	Human	2259	3671	FGF14	1	0.9	low	Yes	No	eggNOG
543	FBgn0033652	ths	FastEpistasis	0	0	1	0	0	0	0	FBGN0033652	ths	36258	FBgn0033652	ths	Human	26281	3677	FGF20	1	0.9	low	Yes	No	eggNOG
543	FBgn0033652	ths	FastEpistasis	0	0	1	0	0	0	0	FBGN0033652	ths	36258	FBgn0033652	ths	Human	8817	3674	FGF18	1	0.9	low	Yes	No	eggNOG
543	FBgn0033652	ths	FastEpistasis	0	0	1	0	0	0	0	FBGN0033652	ths	36258	FBgn0033652	ths	Human	2252	3685	FGF7	1	0.9	low	Yes	No	eggNOG
543	FBgn0033652	ths	FastEpistasis	0	0	1	0	0	0	0	FBGN0033652	ths	36258	FBgn0033652	ths	Human	8074	3680	FGF23	1	0.9	low	Yes	No	eggNOG
543	FBgn0033652	ths	FastEpistasis	0	0	1	0	0	0	0	FBGN0033652	ths	36258	FBgn0033652	ths	Human	2253	3686	FGF8	1	0.9	low	Yes	No	eggNOG
543	FBgn0033652	ths	FastEpistasis	0	0	1	0	0	0	0	FBGN0033652	ths	36258	FBgn0033652	ths	Human	2256	3667	FGF11	1	0.9	low	Yes	No	eggNOG
544	FBgn0039257	tnc	FastEpistasis	0	0	1	0	0	0	0	FBGN0039257	tnc	42990	FBgn0039257	tnc	Human	375616	17585	KCP	1	1.1	low	Yes	No	Panther
544	FBgn0039257	tnc	FastEpistasis	0	0	1	0	0	0	0	FBGN0039257	tnc	42990	FBgn0039257	tnc	Human	114787	24835	GPRIN1	1	0.91	low	Yes	Yes	Phylome
544	FBgn0039257	tnc	FastEpistasis	0	0	1	0	0	0	0	FBGN0039257	tnc	42990	FBgn0039257	tnc	Human	4133	6839	MAP2	1	0.91	low	Yes	No	Phylome
544	FBgn0039257	tnc	FastEpistasis	0	0	1	0	0	0	0	FBGN0039257	tnc	42990	FBgn0039257	tnc	Human	4135	6868	MAP6	1	0.91	low	Yes	Yes	Phylome
544	FBgn0039257	tnc	FastEpistasis	0	0	1	0	0	0	0	FBGN0039257	tnc	42990	FBgn0039257	tnc	Human	9590	370	AKAP12	1	0.91	low	Yes	Yes	Phylome
544	FBgn0039257	tnc	FastEpistasis	0	0	1	0	0	0	0	FBGN0039257	tnc	42990	FBgn0039257	tnc	Human	254102	30682	EHBP1L1	1	0.91	low	Yes	No	Phylome
544	FBgn0039257	tnc	FastEpistasis	0	0	1	0	0	0	0	FBGN0039257	tnc	42990	FBgn0039257	tnc	Human	57142	14085	RTN4	1	0.91	low	Yes	No	Phylome
544	FBgn0039257	tnc	FastEpistasis	0	0	1	0	0	0	0	FBGN0039257	tnc	42990	FBgn0039257	tnc	Human	10313	10469	RTN3	1	0.91	low	Yes	No	Phylome
544	FBgn0039257	tnc	FastEpistasis	0	0	1	0	0	0	0	FBGN0039257	tnc	42990	FBgn0039257	tnc	Human	9859	28920	CEP170	1	0.91	low	Yes	Yes	Phylome
544	FBgn0039257	tnc	FastEpistasis	0	0	1	0	0	0	0	FBGN0039257	tnc	42990	FBgn0039257	tnc	Human	135656	21666	MUCL3	1	0.9	low	Yes	Yes	eggNOG
544	FBgn0039257	tnc	FastEpistasis	0	0	1	0	0	0	0	FBGN0039257	tnc	42990	FBgn0039257	tnc	Human	6101	10263	RP1	1	0.9	low	Yes	Yes	eggNOG
544	FBgn0039257	tnc	FastEpistasis	0	0	1	0	0	0	0	FBGN0039257	tnc	42990	FBgn0039257	tnc	Human	123169	30401	LEO1	1	0.9	low	Yes	No	eggNOG
544	FBgn0039257	tnc	FastEpistasis	0	0	1	0	0	0	0	FBGN0039257	tnc	42990	FBgn0039257	tnc	Human	1758	2932	DMP1	1	0.9	low	Yes	Yes	eggNOG
544	FBgn0039257	tnc	FastEpistasis	0	0	1	0	0	0	0	FBGN0039257	tnc	42990	FBgn0039257	tnc	Human	3381	5341	IBSP	1	0.9	low	Yes	Yes	eggNOG
548	FBgn0284408	trol	FastEpistasis	0	0	1	0	0	0	0	FBGN0284408	trol	45320	FBgn0284408	trol	Human	133584	26810	EGFLAM	2	1.91	low	No	No	eggNOG, OrthoDB
553	FBgn0267002	unc-104	FastEpistasis	0	0	0	0	0	1	0	FBGN0267002	unc-104	36876	FBgn0267002	unc-104	Human	23303	14405	KIF13B	2	1.93	low	No	No	orthoMCL, RoundUp
553	FBgn0267002	unc-104	FastEpistasis	0	0	0	0	0	1	0	FBGN0267002	unc-104	36876	FBgn0267002	unc-104	Human	63971	14566	KIF13A	2	1.93	low	No	No	orthoMCL, RoundUp
558	FBgn0033194	Vps13	FastEpistasis	0	0	1	0	0	0	0	FBGN0033194	Vps13	35693	FBgn0033194	Vps13	Human	55187	23595	VPS13D	3	2.94	low	No	No	eggNOG, OrthoDB, RoundUp
558	FBgn0033194	Vps13	FastEpistasis	0	0	1	0	0	0	0	FBGN0033194	Vps13	35693	FBgn0033194	Vps13	Human	157680	2183	VPS13B	2	1.93	low	No	No	eggNOG, RoundUp
561	FBgn0028516	ZnT35C	FastEpistasis	1	0	0	0	0	0	0	FBGN0028516	ZnT35C	34890	FBgn0028516	ZnT35C	Human	55532	25355	SLC30A10	2	1.8	low	No	No	eggNOG, orthoMCL
561	FBgn0028516	ZnT35C	FastEpistasis	1	0	0	0	0	0	0	FBGN0028516	ZnT35C	34890	FBgn0028516	ZnT35C	Human	7779	11012	SLC30A1	2	1.8	low	No	No	eggNOG, orthoMCL
1	FBgn0031571	CG3921	FastLMM_FastEpistasis	0	0	0	1	1	0	0	FBGN0031571	bark	33604	FBgn0031571	bark	Human	84695	13869	LOXL3	2	1.98	moderate	Yes	No	Isobase, RoundUp
2	FBgn0040388	boi	FastLMM_FastEpistasis	1	0	0	1	0	0	0	FBGN0040388	boi	31229	FBgn0040388	boi	Human	50937	17104	CDON	5	5.03	moderate	No	Yes	Inparanoid, OrthoDB, Panther, Phylome, TreeFam
3	FBgn0000114	aret	FastLMM_FastEpistasis	0	0	0	0	0	0	1	FBGN0000114	bru1	34648	FBgn0000114	bru1	Human	60677	14059	CELF6	4	3.84	moderate	No	No	eggNOG, OrthoDB, orthoMCL, RoundUp
3	FBgn0000114	aret	FastLMM_FastEpistasis	0	0	0	0	0	0	1	FBGN0000114	bru1	34648	FBgn0000114	bru1	Human	56853	14015	CELF4	4	3.74	moderate	No	No	Compara, eggNOG, OrthoDB, orthoMCL
3	FBgn0000114	aret	FastLMM_FastEpistasis	0	0	0	0	0	0	1	FBGN0000114	bru1	34648	FBgn0000114	bru1	Human	11189	11967	CELF3	4	3.74	moderate	No	No	Compara, eggNOG, OrthoDB, orthoMCL
4	FBgn0259176	bun	FastLMM_FastEpistasis	0	0	0	0	0	1	0	FBGN0259176	bun	34665	FBgn0259176	bun	Human	9819	29095	TSC22D2	7	6.85	moderate	No	Yes	Compara, eggNOG, Hieranoid, Inparanoid, OMA, OrthoInspector, TreeFam
4	FBgn0259176	bun	FastLMM_FastEpistasis	0	0	0	0	0	1	0	FBGN0259176	bun	34665	FBgn0259176	bun	Human	81628	21696	TSC22D4	5	4.86	moderate	No	Yes	Compara, eggNOG, Hieranoid, OrthoInspector, RoundUp
4	FBgn0259176	bun	FastLMM_FastEpistasis	0	0	0	0	0	1	0	FBGN0259176	bun	34665	FBgn0259176	bun	Human	1831	3051	TSC22D3	5	4.86	moderate	No	Yes	Compara, eggNOG, OrthoFinder, OrthoInspector, RoundUp
5	FBgn0039633	CG11873	FastLMM_FastEpistasis	1	0	1	0	1	0	0	FBGN0039633	CG11873	43435	FBgn0039633	CG11873	Human	23506	21111	BICRAL	3	3.15	moderate	No	Yes	Inparanoid, OrthoInspector, Panther
6	FBgn0052264	CG32264	FastLMM_FastEpistasis	0	0	0	1	0	0	0	FBGN0052264	CG32264	38438	FBgn0052264	CG32264	Human	116154	15833	PHACTR3	7	6.94	moderate	No	Yes	Compara, eggNOG, Hieranoid, Inparanoid, OrthoInspector, Panther, TreeFam
6	FBgn0052264	CG32264	FastLMM_FastEpistasis	0	0	0	1	0	0	0	FBGN0052264	CG32264	38438	FBgn0052264	CG32264	Human	65979	25793	PHACTR4	7	6.92	moderate	No	Yes	Compara, eggNOG, Hieranoid, OrthoInspector, Panther, RoundUp, TreeFam
8	FBgn0263131	CG43373	FastLMM_FastEpistasis	0	0	0	0	0	0	1	FBGN0263131	CG43373	39835	FBgn0263131	CG43373	Human	112	237	ADCY6	9	8.95	moderate	No	Yes	eggNOG, Hieranoid, Inparanoid, OrthoFinder, OrthoInspector, Panther, Phylome, RoundUp, TreeFam
9	FBgn0265595	CG42683	FastLMM_FastEpistasis	1	0	1	0	1	0	0	FBGN0265595	CG44422	32063	FBgn0265595	CG44422	Human	80333	30083	KCNIP4	7	6.95	moderate	Yes	No	eggNOG, Homologene, OrthoDB, OrthoInspector, Panther, Phylome, RoundUp
9	FBgn0265595	CG42683	FastLMM_FastEpistasis	1	0	1	0	1	0	0	FBGN0265595	CG44422	32063	FBgn0265595	CG44422	Human	30818	15523	KCNIP3	7	6.9	moderate	Yes	No	eggNOG, Isobase, OrthoDB, OrthoInspector, Panther, Phylome, RoundUp
9	FBgn0265595	CG42683	FastLMM_FastEpistasis	1	0	1	0	1	0	0	FBGN0265595	CG44422	32063	FBgn0265595	CG44422	Human	30820	15521	KCNIP1	6	5.95	moderate	No	No	eggNOG, OrthoDB, OrthoInspector, Panther, Phylome, RoundUp
9	FBgn0265595	CG42683	FastLMM_FastEpistasis	1	0	1	0	1	0	0	FBGN0265595	CG44422	32063	FBgn0265595	CG44422	Human	30819	15522	KCNIP2	5	4.92	moderate	No	No	eggNOG, OrthoDB, OrthoInspector, Panther, Phylome
10	FBgn0053531	Ddr	FastLMM_FastEpistasis	0	1	0	0	0	1	0	FBGN0053531	Ddr	3346209	FBgn0053531	Ddr	Human	780	2730	DDR1	10	9.83	moderate	No	Yes	eggNOG, Hieranoid, Inparanoid, OrthoDB, OrthoFinder, OrthoInspector, orthoMCL, Panther, Phylome, TreeFam
11	FBgn0000568	Eip75B	FastLMM_FastEpistasis	1	0	1	0	0	0	0	FBGN0000568	Eip75B	39999	FBgn0000568	Eip75B	Human	9975	7963	NR1D2	4	4	moderate	Yes	No	Panther, Phylome, RoundUp, TreeFam
11	FBgn0000568	Eip75B	FastLMM_FastEpistasis	1	0	1	0	0	0	0	FBGN0000568	Eip75B	39999	FBgn0000568	Eip75B	Human	9572	7962	NR1D1	3	2.97	moderate	No	Yes	Panther, Phylome, TreeFam
13	FBgn0264606	CG43955	FastLMM_FastEpistasis	0	1	0	0	1	0	0	FBGN0264606	Fife	38337	FBgn0264606	Fife	Human	22999	17282	RIMS1	3	2.95	moderate	Yes	No	eggNOG, Isobase, Panther
14	FBgn0051774	fred	FastLMM_FastEpistasis	0	0	0	0	0	1	1	FBGN0051774	fred	33613	FBgn0051774	fred	Human	4868	7908	NPHS1	2	2	moderate	Yes	No	eggNOG, Panther
16	FBgn0028369	kirre	FastLMM_FastEpistasis	0	1	0	0	0	1	0	FBGN0028369	kirre	31292	FBgn0028369	kirre	Human	84623	23204	KIRREL3	11	10.88	moderate	Yes	No	Compara, eggNOG, Hieranoid, Inparanoid, OrthoDB, OrthoFinder, OrthoInspector, orthoMCL, Panther, RoundUp, TreeFam
16	FBgn0028369	kirre	FastLMM_FastEpistasis	0	1	0	0	0	1	0	FBGN0028369	kirre	31292	FBgn0028369	kirre	Human	55243	15734	KIRREL1	11	10.88	moderate	Yes	No	Compara, eggNOG, Hieranoid, Inparanoid, OrthoDB, OrthoFinder, OrthoInspector, orthoMCL, Panther, RoundUp, TreeFam
16	FBgn0028369	kirre	FastLMM_FastEpistasis	0	1	0	0	0	1	0	FBGN0028369	kirre	31292	FBgn0028369	kirre	Human	84063	18816	KIRREL2	10	9.98	moderate	No	No	Compara, eggNOG, Hieranoid, Inparanoid, OrthoDB, OrthoFinder, OrthoInspector, Panther, RoundUp, TreeFam
18	FBgn0043070	MESK2	FastLMM_FastEpistasis	1	0	0	0	0	1	0	FBGN0043070	MESK2	37451	FBgn0043070	MESK2	Human	10397	7679	NDRG1	12	11.84	moderate	No	Yes	Compara, eggNOG, Hieranoid, Inparanoid, OMA, OrthoDB, OrthoFinder, OrthoInspector, orthoMCL, Panther, Phylome, RoundUp
18	FBgn0043070	MESK2	FastLMM_FastEpistasis	1	0	0	0	0	1	0	FBGN0043070	MESK2	37451	FBgn0043070	MESK2	Human	57447	14460	NDRG2	10	10.01	moderate	No	Yes	eggNOG, Hieranoid, Inparanoid, OMA, OrthoDB, OrthoFinder, OrthoInspector, Panther, Phylome, RoundUp
18	FBgn0043070	MESK2	FastLMM_FastEpistasis	1	0	0	0	0	1	0	FBGN0043070	MESK2	37451	FBgn0043070	MESK2	Human	65009	14466	NDRG4	10	9.91	moderate	No	Yes	Compara, eggNOG, Hieranoid, Inparanoid, OMA, OrthoDB, OrthoFinder, OrthoInspector, Panther, Phylome
18	FBgn0043070	MESK2	FastLMM_FastEpistasis	1	0	0	0	0	1	0	FBGN0043070	MESK2	37451	FBgn0043070	MESK2	Human	102465428	50000	MIR6717	2	1.94	moderate	No	Yes	Compara, OMA
20	FBgn0029881	pigs	FastLMM_FastEpistasis	1	0	0	0	0	0	1	FBGN0029881	pigs	31596	FBgn0029881	pigs	Human	246176	24846	GAS2L2	7	6.88	moderate	No	Yes	eggNOG, Hieranoid, OrthoDB, OrthoFinder, Panther, Phylome, TreeFam
20	FBgn0029881	pigs	FastLMM_FastEpistasis	1	0	0	0	0	0	1	FBGN0029881	pigs	31596	FBgn0029881	pigs	Human	283431	27475	GAS2L3	3	2.82	moderate	No	Yes	eggNOG, OrthoDB, Phylome
20	FBgn0029881	pigs	FastLMM_FastEpistasis	1	0	0	0	0	0	1	FBGN0029881	pigs	31596	FBgn0029881	pigs	Human	2620	4167	GAS2	3	2.82	moderate	No	Yes	eggNOG, OrthoDB, Phylome
22	FBgn0040752	Prosap	FastLMM_FastEpistasis	0	1	0	0	0	0	1	FBGN0040752	Prosap	50225	FBgn0040752	Prosap	Human	22941	14295	SHANK2	10	9.87	moderate	No	Yes	Compara, eggNOG, Hieranoid, Inparanoid, OrthoFinder, OrthoInspector, orthoMCL, Panther, RoundUp, TreeFam
22	FBgn0040752	Prosap	FastLMM_FastEpistasis	0	1	0	0	0	0	1	FBGN0040752	Prosap	50225	FBgn0040752	Prosap	Human	85358	14294	SHANK3	8	8.02	moderate	No	Yes	Compara, Hieranoid, Inparanoid, OrthoFinder, OrthoInspector, Panther, Phylome, RoundUp
23	FBgn0004369	Ptp99A	FastLMM_FastEpistasis	0	0	0	1	0	0	0	FBGN0004369	Ptp99A	43469	FBgn0004369	Ptp99A	Human	5803	9685	PTPRZ1	7	6.97	moderate	No	Yes	eggNOG, Hieranoid, Inparanoid, OrthoDB, OrthoInspector, Panther, Phylome
25	FBgn0011828	Pxn	FastLMM_FastEpistasis	1	0	0	0	0	1	0	FBGN0011828	Pxn	38326	FBgn0011828	Pxn	Human	137902	26359	PXDNL	11	10.76	moderate	No	Yes	Compara, eggNOG, Hieranoid, Inparanoid, OrthoDB, OrthoFinder, OrthoInspector, orthoMCL, Panther, Phylome, TreeFam
25	FBgn0011828	Pxn	FastLMM_FastEpistasis	1	0	0	0	0	1	0	FBGN0011828	Pxn	38326	FBgn0011828	Pxn	Human	7173	12015	TPO	5	5.04	moderate	No	Yes	eggNOG, OrthoDB, OrthoFinder, Panther, RoundUp
25	FBgn0011828	Pxn	FastLMM_FastEpistasis	1	0	0	0	0	1	0	FBGN0011828	Pxn	38326	FBgn0011828	Pxn	Human	8288	3423	EPX	5	4.97	moderate	No	Yes	Compara, eggNOG, OrthoDB, Panther, RoundUp
25	FBgn0011828	Pxn	FastLMM_FastEpistasis	1	0	0	0	0	1	0	FBGN0011828	Pxn	38326	FBgn0011828	Pxn	Human	4353	7218	MPO	5	4.97	moderate	No	Yes	Compara, eggNOG, OrthoDB, Panther, RoundUp
25	FBgn0011828	Pxn	FastLMM_FastEpistasis	1	0	0	0	0	1	0	FBGN0011828	Pxn	38326	FBgn0011828	Pxn	Human	4025	6678	LPO	4	3.94	moderate	No	Yes	Compara, eggNOG, OrthoDB, Panther
26	FBgn0260943	Rbp6	FastLMM_FastEpistasis	0	1	0	0	0	1	0	FBGN0260943	Rbp6	39919	FBgn0260943	Rbp6	Human	4440	7330	MSI1	11	10.87	moderate	No	Yes	eggNOG, Inparanoid, OMA, OrthoDB, OrthoFinder, OrthoInspector, orthoMCL, Panther, Phylome, RoundUp, TreeFam
29	FBgn0004449	Ten-m	FastLMM_FastEpistasis	0	1	0	0	0	1	0	FBGN0004449	Ten-m	40464	FBgn0004449	Ten-m	Human	55714	29944	TENM3	12	11.79	moderate	No	Yes	Compara, eggNOG, Hieranoid, Inparanoid, OMA, OrthoFinder, OrthoInspector, orthoMCL, Panther, Phylome, RoundUp, TreeFam
29	FBgn0004449	Ten-m	FastLMM_FastEpistasis	0	1	0	0	0	1	0	FBGN0004449	Ten-m	40464	FBgn0004449	Ten-m	Human	26011	29945	TENM4	12	11.79	moderate	No	Yes	Compara, eggNOG, Hieranoid, Inparanoid, OMA, OrthoFinder, OrthoInspector, orthoMCL, Panther, Phylome, RoundUp, TreeFam
30	FBgn0283657	tlk	FastLMM_FastEpistasis	0	1	0	1	0	0	0	FBGN0283657	Tlk	318206	FBgn0283657	Tlk	Human	9874	11841	TLK1	8	7.7	moderate	No	Yes	Compara, eggNOG, OrthoFinder, OrthoInspector, orthoMCL, Panther, Phylome, TreeFam
31	FBgn0051721	Trim9	FastLMM_FastEpistasis	0	0	0	0	1	1	0	FBGN0051721	Trim9	34453	FBgn0051721	Trim9	Human	440730	31859	TRIM67	11	10.86	moderate	No	Yes	eggNOG, Hieranoid, Inparanoid, OMA, OrthoFinder, OrthoInspector, orthoMCL, Panther, Phylome, RoundUp, TreeFam
31	FBgn0051721	Trim9	FastLMM_FastEpistasis	0	0	0	0	1	1	0	FBGN0051721	Trim9	34453	FBgn0051721	Trim9	Human	123722	18024	FSD2	2	2.01	moderate	No	Yes	Panther, Phylome
31	FBgn0051721	Trim9	FastLMM_FastEpistasis	0	0	0	0	1	1	0	FBGN0051721	Trim9	34453	FBgn0051721	Trim9	Human	79187	13745	FSD1	2	2.01	moderate	No	Yes	Panther, Phylome
31	FBgn0051721	Trim9	FastLMM_FastEpistasis	0	0	0	0	1	1	0	FBGN0051721	Trim9	34453	FBgn0051721	Trim9	Human	11043	7096	MID2	2	2.01	moderate	No	Yes	Panther, Phylome
31	FBgn0051721	Trim9	FastLMM_FastEpistasis	0	0	0	0	1	1	0	FBGN0051721	Trim9	34453	FBgn0051721	Trim9	Human	83856	13753	FSD1L	2	2.01	moderate	No	Yes	Panther, Phylome
31	FBgn0051721	Trim9	FastLMM_FastEpistasis	0	0	0	0	1	1	0	FBGN0051721	Trim9	34453	FBgn0051721	Trim9	Human	4281	7095	MID1	2	2.01	moderate	No	Yes	Panther, Phylome
31	FBgn0051721	Trim9	FastLMM_FastEpistasis	0	0	0	0	1	1	0	FBGN0051721	Trim9	34453	FBgn0051721	Trim9	Human	80128	19019	TRIM46	2	2.01	moderate	No	Yes	Panther, Phylome
31	FBgn0051721	Trim9	FastLMM_FastEpistasis	0	0	0	0	1	1	0	FBGN0051721	Trim9	34453	FBgn0051721	Trim9	Human	55521	16280	TRIM36	2	2.01	moderate	No	Yes	Panther, Phylome
33	FBgn0261929	CG42796	FastLMM	0	0	0	0	0	1	0	FBGN0261929	5-HT2B	41017	FBgn0261929	5-HT2B	Human	3358	5295	HTR2C	5	5.02	moderate	Yes	No	Hieranoid, OrthoDB, OrthoInspector, Panther, Phylome
33	FBgn0261929	CG42796	FastLMM	0	0	0	0	0	1	0	FBGN0261929	5-HT2B	41017	FBgn0261929	5-HT2B	Human	3356	5293	HTR2A	5	5.02	moderate	Yes	No	Hieranoid, OrthoDB, OrthoInspector, Panther, Phylome
33	FBgn0261929	CG42796	FastLMM	0	0	0	0	0	1	0	FBGN0261929	5-HT2B	41017	FBgn0261929	5-HT2B	Human	3357	5294	HTR2B	5	5.02	moderate	Yes	No	Hieranoid, OrthoDB, OrthoInspector, Panther, Phylome
34	FBgn0000097	aop	FastLMM	0	0	0	0	0	1	0	FBGN0000097	aop	33392	FBgn0000097	aop	Human	51513	18160	ETV7	8	7.93	moderate	No	Yes	eggNOG, Inparanoid, OrthoDB, OrthoFinder, OrthoInspector, Panther, Phylome, TreeFam
34	FBgn0000097	aop	FastLMM	0	0	0	0	0	1	0	FBGN0000097	aop	33392	FBgn0000097	aop	Human	26298	3246	EHF	2	2	moderate	No	Yes	eggNOG, Panther
34	FBgn0000097	aop	FastLMM	0	0	0	0	0	1	0	FBGN0000097	aop	33392	FBgn0000097	aop	Human	2001	3320	ELF5	2	2	moderate	No	Yes	eggNOG, Panther
34	FBgn0000097	aop	FastLMM	0	0	0	0	0	1	0	FBGN0000097	aop	33392	FBgn0000097	aop	Human	1999	3318	ELF3	2	2	moderate	No	Yes	eggNOG, Panther
35	FBgn0260941	app	FastLMM	1	0	0	0	0	0	0	FBGN0260941	app	39399	FBgn0260941	app	Human	84243	20712	ZDHHC18	8	7.92	moderate	No	Yes	eggNOG, OMA, OrthoDB, OrthoFinder, Panther, Phylome, RoundUp, TreeFam
35	FBgn0260941	app	FastLMM	1	0	0	0	0	0	0	FBGN0260941	app	39399	FBgn0260941	app	Human	51114	18475	ZDHHC9	6	5.9	moderate	No	Yes	eggNOG, OrthoDB, OrthoFinder, OrthoInspector, RoundUp, TreeFam
35	FBgn0260941	app	FastLMM	1	0	0	0	0	0	0	FBGN0260941	app	39399	FBgn0260941	app	Human	131540	20713	ZDHHC19	2	1.91	moderate	No	Yes	eggNOG, OrthoDB
36	FBgn0036111	Aps	FastLMM	0	0	0	0	0	1	0	FBGN0036111	Aps	39226	FBgn0036111	Aps	Human	170685	17621	NUDT10	12	11.87	moderate	No	Yes	eggNOG, Hieranoid, Inparanoid, OMA, OrthoDB, OrthoFinder, OrthoInspector, orthoMCL, Panther, Phylome, RoundUp, TreeFam
36	FBgn0036111	Aps	FastLMM	0	0	0	0	0	1	0	FBGN0036111	Aps	39226	FBgn0036111	Aps	Human	11165	8050	NUDT3	12	11.86	moderate	No	Yes	eggNOG, Hieranoid, Homologene, Inparanoid, OMA, OrthoFinder, OrthoInspector, orthoMCL, Panther, Phylome, RoundUp, TreeFam
36	FBgn0036111	Aps	FastLMM	0	0	0	0	0	1	0	FBGN0036111	Aps	39226	FBgn0036111	Aps	Human	440672	18012	NUDT4B	4	3.95	moderate	No	Yes	Compara, OMA, OrthoDB, OrthoFinder
37	FBgn0034606	ASPP	FastLMM	0	0	1	0	0	0	1	FBGN0034606	ASPP	37422	FBgn0034606	ASPP	Human	7159	12000	TP53BP2	13	12.8	moderate	No	Yes	Compara, eggNOG, Hieranoid, Inparanoid, OMA, OrthoDB, OrthoFinder, OrthoInspector, orthoMCL, Panther, Phylome, RoundUp, TreeFam
37	FBgn0034606	ASPP	FastLMM	0	0	1	0	0	0	1	FBGN0034606	ASPP	37422	FBgn0034606	ASPP	Human	10848	18838	PPP1R13L	3	2.87	moderate	No	Yes	eggNOG, OrthoDB, TreeFam
41	FBgn0020762	Atet	FastLMM	0	0	1	0	0	0	0	FBGN0020762	Atet	33636	FBgn0020762	Atet	Human	9619	73	ABCG1	10	9.87	moderate	No	Yes	Compara, eggNOG, Hieranoid, Inparanoid, OMA, OrthoDB, OrthoFinder, Panther, Phylome, TreeFam
42	FBgn0051477	CG31477	FastLMM	0	1	0	0	0	0	0	FBGN0051477	ATPsynepsilonL	326144	FBgn0051477	ATPsynepsilonL	Human	432369	34026	ATP5F1EP2	5	5.06	moderate	No	No	Hieranoid, Inparanoid, OrthoInspector, Panther, Phylome
43	FBgn0004854	B-H2	FastLMM	0	0	1	0	0	0	0	FBGN0004854	B-H2	32723	FBgn0004854	B-H2	Human	56751	953	BARHL1	9	8.78	moderate	Yes	No	Compara, eggNOG, Inparanoid, OrthoInspector, orthoMCL, Panther, Phylome, RoundUp, TreeFam
43	FBgn0004854	B-H2	FastLMM	0	0	1	0	0	0	0	FBGN0004854	B-H2	32723	FBgn0004854	B-H2	Human	343472	954	BARHL2	8	7.88	moderate	No	No	Compara, eggNOG, Inparanoid, OrthoInspector, Panther, Phylome, RoundUp, TreeFam
43	FBgn0004854	B-H2	FastLMM	0	0	1	0	0	0	0	FBGN0004854	B-H2	32723	FBgn0004854	B-H2	Human	8538	956	BARX2	3	2.93	moderate	No	Yes	Compara, eggNOG, Panther
43	FBgn0004854	B-H2	FastLMM	0	0	1	0	0	0	0	FBGN0004854	B-H2	32723	FBgn0004854	B-H2	Human	56033	955	BARX1	3	2.93	moderate	No	Yes	Compara, eggNOG, Panther
45	FBgn0043362	bchs	FastLMM	0	1	0	0	0	0	0	FBGN0043362	bchs	33819	FBgn0043362	bchs	Human	57705	29323	WDFY4	7	6.9	moderate	No	Yes	eggNOG, OrthoDB, OrthoFinder, orthoMCL, Panther, RoundUp, TreeFam
45	FBgn0043362	bchs	FastLMM	0	1	0	0	0	0	0	FBGN0043362	bchs	33819	FBgn0043362	bchs	Human	8439	8017	NSMAF	2	1.91	moderate	No	Yes	eggNOG, OrthoDB
47	FBgn0264001	bru-3	FastLMM	0	1	0	0	0	0	0	FBGN0264001	bru3	39527	FBgn0264001	bru3	Human	56853	14015	CELF4	10	9.84	moderate	No	Yes	eggNOG, Hieranoid, Inparanoid, OMA, OrthoDB, OrthoFinder, orthoMCL, Panther, Phylome, TreeFam
47	FBgn0264001	bru-3	FastLMM	0	1	0	0	0	0	0	FBGN0264001	bru3	39527	FBgn0264001	bru3	Human	60677	14059	CELF6	10	9.84	moderate	No	Yes	eggNOG, Hieranoid, Inparanoid, OMA, OrthoDB, OrthoFinder, orthoMCL, Panther, Phylome, TreeFam
47	FBgn0264001	bru-3	FastLMM	0	1	0	0	0	0	0	FBGN0264001	bru3	39527	FBgn0264001	bru3	Human	11189	11967	CELF3	10	9.83	moderate	No	Yes	eggNOG, Hieranoid, Inparanoid, OrthoDB, OrthoFinder, OrthoInspector, orthoMCL, Panther, Phylome, TreeFam
49	FBgn0285896	btl	FastLMM	0	0	1	0	1	0	0	FBGN0285896	btl	39564	FBgn0285896	btl	Human	2261	3690	FGFR3	11	10.86	moderate	No	No	eggNOG, Hieranoid, Inparanoid, OrthoDB, OrthoFinder, OrthoInspector, orthoMCL, Panther, Phylome, RoundUp, TreeFam
49	FBgn0285896	btl	FastLMM	0	0	1	0	1	0	0	FBGN0285896	btl	39564	FBgn0285896	btl	Human	2263	3689	FGFR2	11	10.83	moderate	No	Yes	eggNOG, Hieranoid, Homologene, Inparanoid, OrthoDB, OrthoFinder, OrthoInspector, orthoMCL, Panther, Phylome, TreeFam
49	FBgn0285896	btl	FastLMM	0	0	1	0	1	0	0	FBGN0285896	btl	39564	FBgn0285896	btl	Human	2264	3691	FGFR4	10	9.76	moderate	No	No	eggNOG, Hieranoid, Inparanoid, OrthoDB, OrthoFinder, OrthoInspector, orthoMCL, Phylome, RoundUp, TreeFam
50	FBgn0266756	btsz	FastLMM	0	1	0	0	0	0	0	FBGN0266756	btsz	3346167	FBgn0266756	btsz	Human	94122	15589	SYTL5	8	7.8	moderate	No	Yes	eggNOG, OrthoFinder, OrthoInspector, orthoMCL, Panther, Phylome, RoundUp, TreeFam
50	FBgn0266756	btsz	FastLMM	0	1	0	0	0	0	0	FBGN0266756	btsz	3346167	FBgn0266756	btsz	Human	84958	15584	SYTL1	3	2.96	moderate	No	Yes	eggNOG, Panther, TreeFam
50	FBgn0266756	btsz	FastLMM	0	1	0	0	0	0	0	FBGN0266756	btsz	3346167	FBgn0266756	btsz	Human	54843	15585	SYTL2	3	2.96	moderate	No	Yes	eggNOG, Panther, TreeFam
50	FBgn0266756	btsz	FastLMM	0	1	0	0	0	0	0	FBGN0266756	btsz	3346167	FBgn0266756	btsz	Human	94120	15587	SYTL3	3	2.96	moderate	No	Yes	eggNOG, Panther, TreeFam
51	FBgn0259822	Ca-beta	FastLMM	0	0	1	0	0	0	0	FBGN0259822	Ca-beta	34557	FBgn0259822	Ca-beta	Human	783	1402	CACNB2	11	10.78	moderate	No	Yes	Compara, eggNOG, Hieranoid, Inparanoid, OrthoFinder, OrthoInspector, orthoMCL, Panther, Phylome, RoundUp, TreeFam
51	FBgn0259822	Ca-beta	FastLMM	0	0	1	0	0	0	0	FBGN0259822	Ca-beta	34557	FBgn0259822	Ca-beta	Human	784	1403	CACNB3	8	7.81	moderate	No	Yes	Compara, eggNOG, Hieranoid, OMA, OrthoFinder, Panther, Phylome, TreeFam
52	FBgn0010014	CanB	FastLMM	0	1	0	0	0	0	0	FBGN0010014	CanB	44317	FBgn0010014	CanB	Human	5535	9318	PPP3R2	7	6.78	moderate	No	No	eggNOG, OrthoDB, OrthoFinder, orthoMCL, Panther, Phylome, TreeFam
53	FBgn0015614	CanB2	FastLMM	0	0	0	0	0	0	1	FBGN0015614	CanB2	46456	FBgn0015614	CanB2	Human	5535	9318	PPP3R2	8	7.73	moderate	No	Yes	eggNOG, Isobase, OrthoDB, OrthoFinder, orthoMCL, Panther, Phylome, TreeFam
54	FBgn0000256	capu	FastLMM	0	0	0	0	0	1	0	FBGN0000256	capu	33611	FBgn0000256	capu	Human	342184	3768	FMN1	4	3.99	moderate	No	Yes	eggNOG, Panther, RoundUp, TreeFam
56	FBgn0034439	CG10062	FastLMM	0	1	0	0	0	0	0	FBGN0034439	CG10062	37224	FBgn0034439	CG10062	Human	79956	23703	ERMP1	13	12.79	moderate	Yes	No	Compara, eggNOG, Hieranoid, Homologene, Inparanoid, OrthoDB, OrthoFinder, OrthoInspector, orthoMCL, Panther, Phylome, RoundUp, TreeFam
59	FBgn0036170	CG11714	FastLMM	0	0	1	0	0	0	0	FBGN0036170	CG11714	3772566	FBgn0036170	CG11714	Human	55643	15504	BTBD2	2	2	moderate	Yes	No	eggNOG, Panther
59	FBgn0036170	CG11714	FastLMM	0	0	1	0	0	0	0	FBGN0036170	CG11714	3772566	FBgn0036170	CG11714	Human	53339	1120	BTBD1	2	2	moderate	Yes	No	eggNOG, Panther
61	FBgn0033538	CG11883	FastLMM	0	1	0	0	0	0	0	FBGN0033538	CG11883	36121	FBgn0033538	CG11883	Human	4907	8021	NT5E	2	1.8	moderate	Yes	No	eggNOG, orthoMCL
74	FBgn0031045	CG14212	FastLMM	0	0	0	1	0	0	0	FBGN0031045	CG14212	32964	FBgn0031045	CG14212	Human	162466	16815	PHOSPHO1	7	6.88	moderate	Yes	No	Compara, eggNOG, Isobase, OrthoDB, Panther, RoundUp, TreeFam
74	FBgn0031045	CG14212	FastLMM	0	0	0	1	0	0	0	FBGN0031045	CG14212	32964	FBgn0031045	CG14212	Human	493911	28316	PHOSPHO2	6	5.8	moderate	No	No	Compara, eggNOG, OrthoDB, orthoMCL, Panther, TreeFam
79	FBgn0034651	CG15676	FastLMM	0	0	0	0	0	0	1	FBGN0034651	CG15676	37472	FBgn0034651	CG15676	Human	7411	12662	VBP1	4	3.89	moderate	Yes	No	Compara, eggNOG, Panther, TreeFam
83	FBgn0265264	CG17097	FastLMM	0	0	0	1	0	0	0	FBGN0265264	CG17097	34461	FBgn0265264	CG17097	Human	8513	6622	LIPF	6	5.85	moderate	Yes	No	Compara, eggNOG, OrthoDB, OrthoFinder, Panther, Phylome
83	FBgn0265264	CG17097	FastLMM	0	0	0	1	0	0	0	FBGN0265264	CG17097	34461	FBgn0265264	CG17097	Human	643414	23444	LIPK	6	5.85	moderate	Yes	No	Compara, eggNOG, OrthoDB, OrthoFinder, Panther, Phylome
83	FBgn0265264	CG17097	FastLMM	0	0	0	1	0	0	0	FBGN0265264	CG17097	34461	FBgn0265264	CG17097	Human	3988	6617	LIPA	6	5.85	moderate	Yes	No	Compara, eggNOG, OrthoDB, OrthoFinder, Panther, Phylome
83	FBgn0265264	CG17097	FastLMM	0	0	0	1	0	0	0	FBGN0265264	CG17097	34461	FBgn0265264	CG17097	Human	643418	23452	LIPN	6	5.85	moderate	Yes	No	Compara, eggNOG, OrthoDB, OrthoFinder, Panther, Phylome
83	FBgn0265264	CG17097	FastLMM	0	0	0	1	0	0	0	FBGN0265264	CG17097	34461	FBgn0265264	CG17097	Human	340654	23455	LIPM	6	5.85	moderate	Yes	No	Compara, eggNOG, OrthoDB, OrthoFinder, Panther, Phylome
83	FBgn0265264	CG17097	FastLMM	0	0	0	1	0	0	0	FBGN0265264	CG17097	34461	FBgn0265264	CG17097	Human	142910	21773	LIPJ	5	4.84	moderate	No	No	Compara, eggNOG, OrthoFinder, Panther, Phylome
85	FBgn0061356	CG18003	FastLMM	1	0	0	0	0	0	0	FBGN0061356	CG18003	3771779	FBgn0061356	CG18003	Human	51179	4810	HAO2	7	6.88	moderate	No	Yes	Compara, OrthoDB, OrthoFinder, orthoMCL, Panther, Phylome, RoundUp
85	FBgn0061356	CG18003	FastLMM	1	0	0	0	0	0	0	FBGN0061356	CG18003	3771779	FBgn0061356	CG18003	Human	57571	29268	CARNS1	2	2.03	moderate	No	Yes	Compara, Panther
87	FBgn0035384	CG2113	FastLMM	0	0	0	0	1	0	0	FBGN0035384	CG2113	38356	FBgn0035384	CG2113	Human	137735	30655	ABRA	6	5.84	moderate	Yes	No	Compara, eggNOG, OrthoFinder, OrthoInspector, Panther, Phylome
87	FBgn0035384	CG2113	FastLMM	0	0	0	0	1	0	0	FBGN0035384	CG2113	38356	FBgn0035384	CG2113	Human	58527	21230	ABRACL	3	2.71	moderate	No	Yes	eggNOG, orthoMCL, Phylome
90	FBgn0050156	CG30156	FastLMM	0	0	1	0	0	0	0	FBGN0050156	CG30156	246488	FBgn0050156	CG30156	Human	79982	25881	DNAJB14	7	6.81	moderate	Yes	No	Compara, eggNOG, OrthoDB, OrthoFinder, Panther, Phylome, TreeFam
90	FBgn0050156	CG30156	FastLMM	0	0	1	0	0	0	0	FBGN0050156	CG30156	246488	FBgn0050156	CG30156	Human	54788	14891	DNAJB12	7	6.81	moderate	Yes	No	Compara, eggNOG, OrthoDB, OrthoFinder, Panther, Phylome, TreeFam
90	FBgn0050156	CG30156	FastLMM	0	0	1	0	0	0	0	FBGN0050156	CG30156	246488	FBgn0050156	CG30156	Human	202052	28429	DNAJC18	6	5.88	moderate	No	No	eggNOG, OrthoDB, OrthoFinder, Panther, Phylome, TreeFam
90	FBgn0050156	CG30156	FastLMM	0	0	1	0	0	0	0	FBGN0050156	CG30156	246488	FBgn0050156	CG30156	Human	4189	6968	DNAJB9	2	1.91	moderate	No	Yes	eggNOG, OrthoDB
91	FBgn0031645	CG3036	FastLMM	0	0	1	0	0	0	0	FBGN0031645	CG3036	33695	FBgn0031645	CG3036	Human	10246	10930	SLC17A2	4	4.01	moderate	Yes	No	eggNOG, OrthoDB, OrthoFinder, Panther
91	FBgn0031645	CG3036	FastLMM	0	0	1	0	0	0	0	FBGN0031645	CG3036	33695	FBgn0031645	CG3036	Human	10786	10931	SLC17A3	4	4.01	moderate	Yes	No	eggNOG, OrthoDB, OrthoFinder, Panther
91	FBgn0031645	CG3036	FastLMM	0	0	1	0	0	0	0	FBGN0031645	CG3036	33695	FBgn0031645	CG3036	Human	26503	10933	SLC17A5	4	4.01	moderate	Yes	No	eggNOG, OrthoDB, OrthoFinder, Panther
93	FBgn0051267	CG31267	FastLMM	0	0	0	0	1	0	0	FBGN0051267	CG31267	318651	FBgn0051267	CG31267	Human	5655	6358	KLK10	2	1.94	moderate	Yes	No	Compara, OrthoDB
94	FBgn0051495	CG31495	FastLMM	0	1	0	0	0	0	0	FBGN0051495	CG31495	261626	FBgn0051495	CG31495	Human	4905	8016	NSF	6	5.8	moderate	Yes	No	Compara, eggNOG, Isobase, OrthoDB, Panther, Phylome
95	FBgn0051760	CG31760	FastLMM	0	0	1	0	0	0	0	FBGN0051760	CG31760	34642	FBgn0051760	CG31760	Human	57512	23689	GPR158	6	5.81	moderate	No	No	eggNOG, OrthoFinder, OrthoInspector, orthoMCL, Panther, Phylome
96	FBgn0034568	CG3216	FastLMM	0	0	0	0	1	0	0	FBGN0034568	CG3216	37376	FBgn0034568	CG3216	Human	4881	7943	NPR1	7	6.87	moderate	Yes	No	eggNOG, Homologene, OrthoDB, OrthoFinder, orthoMCL, Panther, TreeFam
96	FBgn0034568	CG3216	FastLMM	0	0	0	0	1	0	0	FBGN0034568	CG3216	37376	FBgn0034568	CG3216	Human	4882	7944	NPR2	6	5.87	moderate	No	No	eggNOG, OrthoDB, OrthoFinder, orthoMCL, Panther, TreeFam
97	FBgn0052506	CG32506	FastLMM	0	0	0	1	0	0	1	FBGN0052506	CG32506	318059	FBgn0052506	CG32506	Human	9905	29026	SGSM2	11	10.82	moderate	No	No	eggNOG, Hieranoid, OMA, OrthoDB, OrthoFinder, OrthoInspector, orthoMCL, Panther, Phylome, RoundUp, TreeFam
101	FBgn0053144	CG33144	FastLMM	1	1	0	0	0	0	0	FBGN0053144	CG33144	36131	FBgn0053144	CG33144	Human	255488	21578	RNF144B	5	4.96	moderate	No	Yes	eggNOG, OrthoFinder, OrthoInspector, Panther, TreeFam
101	FBgn0053144	CG33144	FastLMM	1	1	0	0	0	0	0	FBGN0053144	CG33144	36131	FBgn0053144	CG33144	Human	23113	15982	CUL9	2	1.91	moderate	No	Yes	eggNOG, OrthoDB
104	FBgn0083970	CG34134	FastLMM	0	0	0	1	0	0	0	FBGN0083970	CG34134	4379889	FBgn0083970	CG34134	Human	5257	8927	PHKB	2	1.85	moderate	Yes	No	eggNOG, Isobase
105	FBgn0085371	CG34342	FastLMM	0	0	0	1	0	0	0	FBGN0085371	CG34342	5740152	FBgn0085371	CG34342	Human	84188	26222	FAR1	6	5.85	moderate	Yes	No	Compara, eggNOG, OrthoDB, OrthoFinder, Panther, Phylome
105	FBgn0085371	CG34342	FastLMM	0	0	0	1	0	0	0	FBGN0085371	CG34342	5740152	FBgn0085371	CG34342	Human	55711	25531	FAR2	5	4.94	moderate	No	No	Compara, eggNOG, OrthoDB, OrthoFinder, Panther
109	FBgn0028888	CG4168	FastLMM	0	0	1	0	0	0	0	FBGN0028888	CG4168	34889	FBgn0028888	CG4168	Human	3483	5468	IGFALS	2	2.04	moderate	Yes	No	OrthoDB, RoundUp
111	FBgn0259242	CG42340	FastLMM	0	0	1	0	0	0	0	FBGN0259242	CG42340	7354472	FBgn0259242	CG42340	Human	338567	19439	KCNK18	5	4.85	moderate	Yes	No	Compara, eggNOG, OrthoDB, Panther, Phylome
111	FBgn0259242	CG42340	FastLMM	0	0	1	0	0	0	0	FBGN0259242	CG42340	7354472	FBgn0259242	CG42340	Human	56659	6275	KCNK13	2	1.83	moderate	No	Yes	Compara, eggNOG
113	FBgn0260388	CG42514	FastLMM	0	0	0	0	0	0	1	FBGN0260388	CG42514	8674108	FBgn0260388	CG42514	Human	283537	27501	SLC46A3	7	6.88	moderate	Yes	No	Compara, eggNOG, OrthoDB, OrthoInspector, Panther, Phylome, RoundUp
113	FBgn0260388	CG42514	FastLMM	0	0	0	0	0	0	1	FBGN0260388	CG42514	8674108	FBgn0260388	CG42514	Human	113235	30521	SLC46A1	7	6.88	moderate	Yes	No	Compara, eggNOG, OrthoDB, OrthoInspector, Panther, Phylome, RoundUp
114	FBgn0261550	CG42668	FastLMM	0	0	0	1	0	0	0	FBGN0261550	CG42668	42412	FBgn0261550	CG42668	Human	114885	16397	OSBPL11	3	2.94	moderate	No	Yes	eggNOG, OrthoDB, RoundUp
114	FBgn0261550	CG42668	FastLMM	0	0	0	1	0	0	0	FBGN0261550	CG42668	42412	FBgn0261550	CG42668	Human	114884	16395	OSBPL10	2	1.93	moderate	No	Yes	eggNOG, RoundUp
118	FBgn0036274	CG4328	FastLMM	0	0	1	0	0	0	0	FBGN0036274	CG4328	39405	FBgn0036274	CG4328	Human	4010	6654	LMX1B	10	9.91	moderate	Yes	No	eggNOG, Hieranoid, Inparanoid, Isobase, OrthoDB, OrthoFinder, Panther, Phylome, RoundUp, TreeFam
118	FBgn0036274	CG4328	FastLMM	0	0	1	0	0	0	0	FBGN0036274	CG4328	39405	FBgn0036274	CG4328	Human	4009	6653	LMX1A	9	8.96	moderate	No	No	eggNOG, Hieranoid, Inparanoid, OrthoDB, OrthoFinder, Panther, Phylome, RoundUp, TreeFam
125	FBgn0285963	sda	FastLMM	0	0	1	0	0	0	0	FBGN0285963	CG46339	44359	FBgn0285963	CG46339	Human	4012	6656	LNPEP	4	3.94	moderate	Yes	No	Compara, eggNOG, OrthoDB, Panther
125	FBgn0285963	sda	FastLMM	0	0	1	0	0	0	0	FBGN0285963	CG46339	44359	FBgn0285963	CG46339	Human	51752	18173	ERAP1	4	3.94	moderate	Yes	No	Compara, eggNOG, OrthoDB, Panther
125	FBgn0285963	sda	FastLMM	0	0	1	0	0	0	0	FBGN0285963	CG46339	44359	FBgn0285963	CG46339	Human	64167	29499	ERAP2	4	3.94	moderate	Yes	No	Compara, eggNOG, OrthoDB, Panther
125	FBgn0285963	sda	FastLMM	0	0	1	0	0	0	0	FBGN0285963	CG46339	44359	FBgn0285963	CG46339	Human	57140	10079	RNPEPL1	2	1.83	moderate	No	Yes	Compara, eggNOG
126	FBgn0030778	CG4678	FastLMM	0	0	0	1	0	0	0	FBGN0030778	CG4678	32652	FBgn0030778	CG4678	Human	1363	2303	CPE	4	3.89	moderate	No	Yes	eggNOG, Isobase, OrthoDB, RoundUp
126	FBgn0030778	CG4678	FastLMM	0	0	0	1	0	0	0	FBGN0030778	CG4678	32652	FBgn0030778	CG4678	Human	56265	15771	CPXM1	2	1.91	moderate	No	Yes	eggNOG, OrthoDB
126	FBgn0030778	CG4678	FastLMM	0	0	0	1	0	0	0	FBGN0030778	CG4678	32652	FBgn0030778	CG4678	Human	119587	26977	CPXM2	2	1.91	moderate	No	Yes	eggNOG, OrthoDB
126	FBgn0030778	CG4678	FastLMM	0	0	0	1	0	0	0	FBGN0030778	CG4678	32652	FBgn0030778	CG4678	Human	8532	2333	CPZ	2	1.91	moderate	No	Yes	eggNOG, OrthoDB
130	FBgn0038484	CG5246	FastLMM	0	0	0	0	1	0	0	FBGN0038484	CG5246	42072	FBgn0038484	CG5246	Human	5646	9486	PRSS3	2	1.92	moderate	Yes	No	OrthoDB, Phylome
131	FBgn0036186	CG6071	FastLMM	0	0	1	0	0	0	0	FBGN0036186	CG6071	39308	FBgn0036186	CG6071	Human	4012	6656	LNPEP	4	3.94	moderate	Yes	No	Compara, eggNOG, OrthoDB, Panther
131	FBgn0036186	CG6071	FastLMM	0	0	1	0	0	0	0	FBGN0036186	CG6071	39308	FBgn0036186	CG6071	Human	51752	18173	ERAP1	4	3.94	moderate	Yes	No	Compara, eggNOG, OrthoDB, Panther
131	FBgn0036186	CG6071	FastLMM	0	0	1	0	0	0	0	FBGN0036186	CG6071	39308	FBgn0036186	CG6071	Human	64167	29499	ERAP2	4	3.94	moderate	Yes	No	Compara, eggNOG, OrthoDB, Panther
131	FBgn0036186	CG6071	FastLMM	0	0	1	0	0	0	0	FBGN0036186	CG6071	39308	FBgn0036186	CG6071	Human	57140	10079	RNPEPL1	2	1.83	moderate	No	Yes	Compara, eggNOG
131	FBgn0036186	CG6071	FastLMM	0	0	1	0	0	0	0	FBGN0036186	CG6071	39308	FBgn0036186	CG6071	Human	6051	10078	RNPEP	2	1.83	moderate	No	Yes	Compara, eggNOG
135	FBgn0038921	CG6332	FastLMM	0	0	0	0	0	0	1	FBGN0038921	CG6332	42585	FBgn0038921	CG6332	Human	100506564	43771	THEGL	3	2.99	moderate	No	Yes	Compara, Panther, TreeFam
136	FBgn0037860	CG6629	FastLMM	0	0	0	0	0	1	0	FBGN0037860	CG6629	41324	FBgn0037860	CG6629	Human	6391	10682	SDHC	10	9.66	moderate	Yes	No	Compara, eggNOG, Hieranoid, Isobase, OrthoDB, OrthoFinder, orthoMCL, Panther, Phylome, TreeFam
138	FBgn0036168	CG7512	FastLMM	0	1	1	0	0	0	0	FBGN0036168	CG7512	39289	FBgn0036168	CG7512	Human	54897	26002	CASZ1	6	5.86	moderate	Yes	No	Compara, eggNOG, OrthoFinder, orthoMCL, Panther, RoundUp
139	FBgn0032026	CG7627	FastLMM	0	0	0	1	0	0	1	FBGN0032026	CG7627	34148	FBgn0032026	CG7627	Human	10257	55	ABCC4	13	12.84	moderate	Yes	No	Compara, eggNOG, Hieranoid, Homologene, Inparanoid, OMA, OrthoDB, OrthoFinder, OrthoInspector, orthoMCL, Panther, Phylome, RoundUp
139	FBgn0032026	CG7627	FastLMM	0	0	0	1	0	0	1	FBGN0032026	CG7627	34148	FBgn0032026	CG7627	Human	94160	14640	ABCC12	6	5.69	moderate	No	Yes	Compara, eggNOG, Isobase, OrthoDB, OrthoFinder, orthoMCL
139	FBgn0032026	CG7627	FastLMM	0	0	0	1	0	0	1	FBGN0032026	CG7627	34148	FBgn0032026	CG7627	Human	85320	14639	ABCC11	6	5.69	moderate	No	Yes	Compara, eggNOG, Isobase, OrthoDB, OrthoFinder, orthoMCL
139	FBgn0032026	CG7627	FastLMM	0	0	0	1	0	0	1	FBGN0032026	CG7627	34148	FBgn0032026	CG7627	Human	1080	1884	CFTR	5	4.85	moderate	No	Yes	Compara, eggNOG, OrthoDB, Panther, Phylome
139	FBgn0032026	CG7627	FastLMM	0	0	0	1	0	0	1	FBGN0032026	CG7627	34148	FBgn0032026	CG7627	Human	89845	52	ABCC10	5	4.74	moderate	No	No	Compara, eggNOG, OrthoDB, OrthoFinder, orthoMCL
139	FBgn0032026	CG7627	FastLMM	0	0	0	1	0	0	1	FBGN0032026	CG7627	34148	FBgn0032026	CG7627	Human	1244	53	ABCC2	5	4.74	moderate	No	No	Compara, eggNOG, OrthoDB, OrthoFinder, orthoMCL
139	FBgn0032026	CG7627	FastLMM	0	0	0	1	0	0	1	FBGN0032026	CG7627	34148	FBgn0032026	CG7627	Human	6833	59	ABCC8	5	4.74	moderate	No	No	Compara, eggNOG, OrthoDB, OrthoFinder, orthoMCL
139	FBgn0032026	CG7627	FastLMM	0	0	0	1	0	0	1	FBGN0032026	CG7627	34148	FBgn0032026	CG7627	Human	10060	60	ABCC9	5	4.74	moderate	No	No	Compara, eggNOG, OrthoDB, OrthoFinder, orthoMCL
139	FBgn0032026	CG7627	FastLMM	0	0	0	1	0	0	1	FBGN0032026	CG7627	34148	FBgn0032026	CG7627	Human	368	57	ABCC6	5	4.74	moderate	No	No	Compara, eggNOG, OrthoDB, OrthoFinder, orthoMCL
139	FBgn0032026	CG7627	FastLMM	0	0	0	1	0	0	1	FBGN0032026	CG7627	34148	FBgn0032026	CG7627	Human	8714	54	ABCC3	5	4.74	moderate	No	No	Compara, eggNOG, OrthoDB, OrthoFinder, orthoMCL
139	FBgn0032026	CG7627	FastLMM	0	0	0	1	0	0	1	FBGN0032026	CG7627	34148	FBgn0032026	CG7627	Human	4363	51	ABCC1	5	4.74	moderate	No	No	Compara, eggNOG, OrthoDB, OrthoFinder, orthoMCL
139	FBgn0032026	CG7627	FastLMM	0	0	0	1	0	0	1	FBGN0032026	CG7627	34148	FBgn0032026	CG7627	Human	10057	56	ABCC5	5	4.74	moderate	No	No	Compara, eggNOG, OrthoDB, OrthoFinder, orthoMCL
140	FBgn0036929	CG7668	FastLMM	0	0	0	0	0	1	0	FBGN0036929	CG7668	40190	FBgn0036929	CG7668	Human	84929	25922	FIBCD1	3	3	moderate	Yes	No	eggNOG, OrthoFinder, Panther
140	FBgn0036929	CG7668	FastLMM	0	0	0	0	0	1	0	FBGN0036929	CG7668	40190	FBgn0036929	CG7668	Human	2219	3623	FCN1	3	2.86	moderate	Yes	No	eggNOG, OrthoFinder, TreeFam
140	FBgn0036929	CG7668	FastLMM	0	0	0	0	0	1	0	FBGN0036929	CG7668	40190	FBgn0036929	CG7668	Human	2220	3624	FCN2	3	2.86	moderate	Yes	No	eggNOG, OrthoFinder, TreeFam
140	FBgn0036929	CG7668	FastLMM	0	0	0	0	0	1	0	FBGN0036929	CG7668	40190	FBgn0036929	CG7668	Human	253935	19705	ANGPTL5	2	2	moderate	No	Yes	eggNOG, Panther
140	FBgn0036929	CG7668	FastLMM	0	0	0	0	0	1	0	FBGN0036929	CG7668	40190	FBgn0036929	CG7668	Human	2244	3662	FGB	2	2	moderate	No	Yes	eggNOG, Panther
143	FBgn0035252	CG7970	FastLMM	0	0	0	0	0	1	0	FBGN0035252	CG7970	38205	FBgn0035252	CG7970	Human	84769	28177	MPV17L2	4	3.94	moderate	No	No	eggNOG, OrthoDB, OrthoFinder, RoundUp
143	FBgn0035252	CG7970	FastLMM	0	0	0	0	0	1	0	FBGN0035252	CG7970	38205	FBgn0035252	CG7970	Human	4358	7224	MPV17	4	3.94	moderate	No	No	eggNOG, OrthoDB, OrthoFinder, RoundUp
144	FBgn0037612	CG8112	FastLMM	0	1	0	0	1	0	0	FBGN0037612	CG8112	41033	FBgn0037612	CG8112	Human	8435	11178	SOAT2	11	10.94	moderate	No	Yes	Compara, eggNOG, Hieranoid, Inparanoid, OMA, OrthoDB, OrthoFinder, OrthoInspector, Panther, Phylome, RoundUp
146	FBgn0037720	CG8312	FastLMM	0	0	0	0	0	1	0	FBGN0037720	CG8312	41163	FBgn0037720	CG8312	Human	163933	31791	FAM43B	7	6.87	moderate	No	Yes	Compara, eggNOG, OrthoFinder, OrthoInspector, Panther, Phylome, RoundUp
146	FBgn0037720	CG8312	FastLMM	0	0	0	0	0	1	0	FBGN0037720	CG8312	41163	FBgn0037720	CG8312	Human	55022	26084	PID1	2	1.81	moderate	No	Yes	eggNOG, Phylome
149	FBgn0033638	CG9005	FastLMM	0	0	0	0	1	0	0	FBGN0033638	CG9005	36243	FBgn0033638	CG9005	Human	80256	25666	FAM214B	5	5.03	moderate	No	Yes	eggNOG, OrthoFinder, OrthoInspector, Panther, RoundUp
150	FBgn0028847	CG9014	FastLMM	0	0	0	0	0	1	0	FBGN0028847	CG9014	34777	FBgn0028847	CG9014	Human	10193	18401	RNF41	5	4.97	moderate	Yes	No	eggNOG, OrthoDB, OrthoFinder, Panther, TreeFam
150	FBgn0028847	CG9014	FastLMM	0	0	0	0	0	1	0	FBGN0028847	CG9014	34777	FBgn0028847	CG9014	Human	7188	12035	TRAF5	2	1.91	moderate	No	Yes	eggNOG, OrthoDB
154	FBgn0029939	CG9650	FastLMM	0	0	1	0	0	0	0	FBGN0029939	CG9650	31660	FBgn0029939	CG9650	Human	53335	13221	BCL11A	11	10.89	moderate	No	Yes	Compara, eggNOG, Hieranoid, Inparanoid, OrthoDB, OrthoFinder, OrthoInspector, Panther, Phylome, RoundUp, TreeFam
154	FBgn0029939	CG9650	FastLMM	0	0	1	0	0	0	0	FBGN0029939	CG9650	31660	FBgn0029939	CG9650	Human	162979	15981	ZNF296	3	2.97	moderate	No	Yes	Panther, Phylome, TreeFam
155	FBgn0030775	CG9673	FastLMM	0	0	0	1	0	0	0	FBGN0030775	CG9673	32649	FBgn0030775	CG9673	Human	221191	26336	PRSS54	2	2.03	moderate	No	Yes	Compara, Panther
155	FBgn0030775	CG9673	FastLMM	0	0	0	1	0	0	0	FBGN0030775	CG9673	32649	FBgn0030775	CG9673	Human	284366	6370	KLK9	2	1.91	moderate	No	Yes	eggNOG, OrthoDB
156	FBgn0034490	CG9864	FastLMM	0	0	1	0	0	0	0	FBGN0034490	CG9864	37287	FBgn0034490	CG9864	Human	10246	10930	SLC17A2	4	4.01	moderate	Yes	No	eggNOG, OrthoDB, OrthoFinder, Panther
156	FBgn0034490	CG9864	FastLMM	0	0	1	0	0	0	0	FBGN0034490	CG9864	37287	FBgn0034490	CG9864	Human	10786	10931	SLC17A3	4	4.01	moderate	Yes	No	eggNOG, OrthoDB, OrthoFinder, Panther
160	FBgn0034582	Cht9	FastLMM	1	0	0	0	0	0	0	FBGN0034582	Cht9	37392	FBgn0034582	Cht9	Human	27159	17432	CHIA	6	5.95	moderate	Yes	No	Compara, eggNOG, OMA, OrthoDB, OrthoFinder, Panther
160	FBgn0034582	Cht9	FastLMM	1	0	0	0	0	0	0	FBGN0034582	Cht9	37392	FBgn0034582	Cht9	Human	1118	1936	CHIT1	6	5.8	moderate	Yes	No	Compara, eggNOG, Isobase, OMA, OrthoDB, OrthoFinder
160	FBgn0034582	Cht9	FastLMM	1	0	0	0	0	0	0	FBGN0034582	Cht9	37392	FBgn0034582	Cht9	Human	1116	1932	CHI3L1	5	4.85	moderate	No	No	Compara, eggNOG, OMA, OrthoDB, OrthoFinder
160	FBgn0034582	Cht9	FastLMM	1	0	0	0	0	0	0	FBGN0034582	Cht9	37392	FBgn0034582	Cht9	Human	1117	1933	CHI3L2	4	3.95	moderate	No	No	Compara, OMA, OrthoDB, OrthoFinder
160	FBgn0034582	Cht9	FastLMM	1	0	0	0	0	0	0	FBGN0034582	Cht9	37392	FBgn0034582	Cht9	Human	5016	8524	OVGP1	4	3.84	moderate	No	No	Compara, eggNOG, OrthoDB, OrthoFinder
162	FBgn0037613	Cks85A	FastLMM	0	1	0	0	1	0	0	FBGN0037613	Cks85A	41034	FBgn0037613	Cks85A	Human	1164	2000	CKS2	9	8.81	moderate	Yes	No	Compara, eggNOG, Hieranoid, OMA, OrthoDB, OrthoFinder, orthoMCL, Panther, TreeFam
162	FBgn0037613	Cks85A	FastLMM	0	1	0	0	1	0	0	FBGN0037613	Cks85A	41034	FBgn0037613	Cks85A	Human	1163	19083	CKS1B	9	8.73	moderate	Yes	No	eggNOG, Hieranoid, Homologene, Isobase, OMA, OrthoDB, OrthoFinder, orthoMCL, TreeFam
165	FBgn0031066	CoVIb	FastLMM	1	0	0	0	0	0	0	FBGN0031066	COX6B	32989	FBgn0031066	COX6B	Human	125965	24380	COX6B2	8	7.88	moderate	No	Yes	Compara, Hieranoid, OMA, OrthoFinder, orthoMCL, Panther, Phylome, RoundUp
171	FBgn0035790	Cyp316a1	FastLMM	0	0	0	0	1	0	0	FBGN0035790	Cyp316a1	38840	FBgn0035790	Cyp316a1	Human	1588	2594	CYP19A1	3	3.01	moderate	Yes	No	eggNOG, OrthoDB, Panther
171	FBgn0035790	Cyp316a1	FastLMM	0	0	0	0	1	0	0	FBGN0035790	Cyp316a1	38840	FBgn0035790	Cyp316a1	Human	285440	23198	CYP4V2	3	3.01	moderate	Yes	No	eggNOG, OrthoDB, Panther
171	FBgn0035790	Cyp316a1	FastLMM	0	0	0	0	1	0	0	FBGN0035790	Cyp316a1	38840	FBgn0035790	Cyp316a1	Human	1580	2644	CYP4B1	3	2.86	moderate	Yes	No	eggNOG, Isobase, OrthoDB
172	FBgn0038194	Cyp6d5	FastLMM	0	1	0	0	1	0	0	FBGN0038194	Cyp6d5	41706	FBgn0038194	Cyp6d5	Human	64816	17450	CYP3A43	4	3.82	moderate	Yes	No	eggNOG, Hieranoid, OrthoDB, Phylome
172	FBgn0038194	Cyp6d5	FastLMM	0	1	0	0	1	0	0	FBGN0038194	Cyp6d5	41706	FBgn0038194	Cyp6d5	Human	100861540	51504	CYP3A7-CYP3A51P	4	3.82	moderate	Yes	No	eggNOG, Hieranoid, OrthoDB, Phylome
172	FBgn0038194	Cyp6d5	FastLMM	0	1	0	0	1	0	0	FBGN0038194	Cyp6d5	41706	FBgn0038194	Cyp6d5	Human	1576	2637	CYP3A4	4	3.82	moderate	Yes	No	eggNOG, Hieranoid, OrthoDB, Phylome
172	FBgn0038194	Cyp6d5	FastLMM	0	1	0	0	1	0	0	FBGN0038194	Cyp6d5	41706	FBgn0038194	Cyp6d5	Human	1577	2638	CYP3A5	4	3.82	moderate	Yes	No	eggNOG, Hieranoid, OrthoDB, Phylome
174	FBgn0263930	dally	FastLMM	0	1	0	0	0	0	0	FBGN0263930	dally	39013	FBgn0263930	dally	Human	2719	4451	GPC3	9	8.86	moderate	No	Yes	Compara, eggNOG, Hieranoid, Inparanoid, OrthoDB, OrthoFinder, Panther, Phylome, TreeFam
176	FBgn0051646	CG31646	FastLMM	0	0	0	0	0	0	1	FBGN0051646	DIP-theta	33795	FBgn0051646	DIP-theta	Human	4978	8143	OPCML	8	7.99	moderate	Yes	No	eggNOG, Hieranoid, Homologene, Inparanoid, OrthoDB, OrthoFinder, OrthoInspector, RoundUp
176	FBgn0051646	CG31646	FastLMM	0	0	0	0	0	0	1	FBGN0051646	DIP-theta	33795	FBgn0051646	DIP-theta	Human	402665	34550	IGLON5	6	5.96	moderate	No	No	eggNOG, Hieranoid, Inparanoid, OrthoDB, OrthoFinder, OrthoInspector
176	FBgn0051646	CG31646	FastLMM	0	0	0	0	0	0	1	FBGN0051646	DIP-theta	33795	FBgn0051646	DIP-theta	Human	4045	6705	LSAMP	6	5.94	moderate	No	No	eggNOG, Hieranoid, OrthoDB, OrthoFinder, OrthoInspector, RoundUp
176	FBgn0051646	CG31646	FastLMM	0	0	0	0	0	0	1	FBGN0051646	DIP-theta	33795	FBgn0051646	DIP-theta	Human	257194	17302	NEGR1	5	4.91	moderate	No	No	eggNOG, Hieranoid, OrthoDB, OrthoFinder, OrthoInspector
178	FBgn0053196	dp	FastLMM	0	0	0	0	0	1	0	FBGN0053196	dpy	318824	FBgn0053196	dpy	Human	2200	3603	FBN1	3	2.91	moderate	No	Yes	eggNOG, OrthoDB, OrthoInspector
178	FBgn0053196	dp	FastLMM	0	0	0	0	0	1	0	FBGN0053196	dpy	318824	FBgn0053196	dpy	Human	4052	6714	LTBP1	2	2.01	moderate	No	Yes	OrthoDB, OrthoInspector
178	FBgn0053196	dp	FastLMM	0	0	0	0	0	1	0	FBGN0053196	dpy	318824	FBgn0053196	dpy	Human	8425	6717	LTBP4	2	2.01	moderate	No	Yes	OrthoDB, OrthoInspector
178	FBgn0053196	dp	FastLMM	0	0	0	0	0	1	0	FBGN0053196	dpy	318824	FBgn0053196	dpy	Human	4053	6715	LTBP2	2	2.01	moderate	No	Yes	OrthoDB, OrthoInspector
179	FBgn0024732	Drep-1	FastLMM	0	0	0	0	0	1	0	FBGN0024732	Drep1	36290	FBgn0024732	Drep1	Human	27141	1977	CIDEB	6	6.02	moderate	No	Yes	Compara, OrthoFinder, OrthoInspector, Panther, RoundUp, TreeFam
179	FBgn0024732	Drep-1	FastLMM	0	0	0	0	0	1	0	FBGN0024732	Drep1	36290	FBgn0024732	Drep1	Human	1676	2772	DFFA	4	3.87	moderate	No	Yes	Compara, OrthoDB, orthoMCL, RoundUp
180	FBgn0028407	Drep-3	FastLMM	0	0	0	0	0	1	0	FBGN0028407	Drep3	36292	FBgn0028407	Drep3	Human	27141	1977	CIDEB	6	5.99	moderate	No	Yes	Compara, Hieranoid, OrthoFinder, OrthoInspector, Panther, TreeFam
181	FBgn0033159	Dscam	FastLMM	0	0	0	0	0	0	1	FBGN0033159	Dscam1	35652	FBgn0033159	Dscam1	Human	1826	3039	DSCAM	11	10.84	moderate	No	No	eggNOG, Hieranoid, Inparanoid, OMA, OrthoDB, OrthoFinder, OrthoInspector, orthoMCL, Panther, Phylome, TreeFam
182	FBgn0016930	smi35A	FastLMM	0	0	0	0	0	0	1	FBGN0016930	Dyrk2	34831	FBgn0016930	Dyrk2	Human	8444	3094	DYRK3	6	5.84	moderate	No	No	eggNOG, Hieranoid, OrthoDB, OrthoFinder, orthoMCL, RoundUp
182	FBgn0016930	smi35A	FastLMM	0	0	0	0	0	0	1	FBGN0016930	Dyrk2	34831	FBgn0016930	Dyrk2	Human	8445	3093	DYRK2	6	5.84	moderate	No	No	eggNOG, Hieranoid, OrthoDB, OrthoFinder, orthoMCL, RoundUp
183	FBgn0260003	Dys	FastLMM	0	0	0	0	1	0	0	FBGN0260003	Dys	42327	FBgn0260003	Dys	Human	7402	12635	UTRN	9	8.73	moderate	No	Yes	eggNOG, Hieranoid, Inparanoid, OMA, OrthoFinder, OrthoInspector, orthoMCL, Phylome, TreeFam
183	FBgn0260003	Dys	FastLMM	0	0	0	0	1	0	0	FBGN0260003	Dys	42327	FBgn0260003	Dys	Human	1821	3032	DRP2	5	4.83	moderate	No	Yes	eggNOG, OrthoFinder, OrthoInspector, orthoMCL, RoundUp
184	FBgn0264006	dysc	FastLMM	0	0	0	0	1	0	0	FBGN0264006	dysc	39533	FBgn0264006	dysc	Human	79955	26257	PDZD7	3	3.01	moderate	No	Yes	eggNOG, OrthoDB, Panther
186	FBgn0000536	eas	FastLMM	0	0	0	1	0	0	0	FBGN0000536	eas	32585	FBgn0000536	eas	Human	55224	25575	ETNK2	11	10.76	moderate	No	Yes	Compara, eggNOG, Hieranoid, Inparanoid, OrthoDB, OrthoFinder, OrthoInspector, orthoMCL, Panther, Phylome, TreeFam
187	FBgn0000542	ec	FastLMM	0	1	0	0	0	0	0	FBGN0000542	ec	31339	FBgn0000542	ec	Human	54532	29255	USP53	4	3.91	moderate	No	Yes	eggNOG, Isobase, Panther, TreeFam
190	FBgn0013953	Esp	FastLMM	0	0	0	0	0	1	0	FBGN0013953	Esp	42962	FBgn0013953	Esp	Human	284129	14471	SLC26A11	10	9.74	moderate	Yes	No	Compara, eggNOG, Hieranoid, OrthoDB, OrthoFinder, orthoMCL, Panther, Phylome, RoundUp, TreeFam
191	FBgn0039225	Ets96B	FastLMM	0	0	1	0	0	0	0	FBGN0039225	Ets96B	42952	FBgn0039225	Ets96B	Human	2119	3494	ETV5	6	5.99	moderate	No	Yes	eggNOG, OrthoFinder, OrthoInspector, Panther, RoundUp, TreeFam
191	FBgn0039225	Ets96B	FastLMM	0	0	1	0	0	0	0	FBGN0039225	Ets96B	42952	FBgn0039225	Ets96B	Human	2118	3493	ETV4	6	5.89	moderate	No	Yes	Compara, eggNOG, OrthoFinder, OrthoInspector, Panther, TreeFam
197	FBgn0285958	Fuca	FastLMM	0	0	1	0	0	0	0	FBGN0285958	Fuca	3772574	FBgn0285958	Fuca	Human	2517	4006	FUCA1	8	7.77	moderate	No	Yes	Compara, eggNOG, Inparanoid, OrthoFinder, OrthoInspector, orthoMCL, RoundUp, TreeFam
198	FBgn0004509	Fur1	FastLMM	0	0	1	0	0	0	0	FBGN0004509	Fur1	47220	FBgn0004509	Fur1	Human	54760	8746	PCSK4	6	5.77	moderate	No	Yes	eggNOG, OrthoFinder, orthoMCL, Panther, Phylome, TreeFam
198	FBgn0004509	Fur1	FastLMM	0	0	1	0	0	0	0	FBGN0004509	Fur1	47220	FBgn0004509	Fur1	Human	5122	8743	PCSK1	4	3.98	moderate	No	Yes	eggNOG, Inparanoid, OrthoFinder, RoundUp
198	FBgn0004509	Fur1	FastLMM	0	0	1	0	0	0	0	FBGN0004509	Fur1	47220	FBgn0004509	Fur1	Human	5046	8569	PCSK6	4	3.9	moderate	No	No	eggNOG, OrthoFinder, orthoMCL, Panther
198	FBgn0004509	Fur1	FastLMM	0	0	1	0	0	0	0	FBGN0004509	Fur1	47220	FBgn0004509	Fur1	Human	9159	8748	PCSK7	4	3.83	moderate	No	Yes	eggNOG, OrthoFinder, orthoMCL, RoundUp
199	FBgn0266721	CG6208	FastLMM	0	1	0	0	0	0	0	FBGN0266721	gammaSnap2	41239	FBgn0266721	gammaSnap2	Human	8774	7642	NAPG	13	12.77	moderate	Yes	No	Compara, eggNOG, Hieranoid, Homologene, Inparanoid, OMA, OrthoDB, OrthoFinder, OrthoInspector, orthoMCL, Panther, Phylome, TreeFam
200	FBgn0004623	Gbeta76C	FastLMM	0	0	0	0	0	1	0	FBGN0004623	Gbeta76C	40148	FBgn0004623	Gbeta76C	Human	2782	4396	GNB1	5	4.96	moderate	Yes	No	eggNOG, Isobase, OrthoDB, OrthoFinder, Panther
200	FBgn0004623	Gbeta76C	FastLMM	0	0	0	0	0	1	0	FBGN0004623	Gbeta76C	40148	FBgn0004623	Gbeta76C	Human	2784	4400	GNB3	4	4.01	moderate	No	No	eggNOG, OrthoDB, OrthoFinder, Panther
200	FBgn0004623	Gbeta76C	FastLMM	0	0	0	0	0	1	0	FBGN0004623	Gbeta76C	40148	FBgn0004623	Gbeta76C	Human	59345	20731	GNB4	4	4.01	moderate	No	No	eggNOG, OrthoDB, OrthoFinder, Panther
201	FBgn0001098	Gdh	FastLMM	0	0	0	1	0	0	0	FBGN0001098	Gdh	42832	FBgn0001098	Gdh	Human	2747	4336	GLUD2	13	12.8	moderate	No	Yes	Compara, eggNOG, Hieranoid, Inparanoid, OMA, OrthoDB, OrthoFinder, OrthoInspector, orthoMCL, Panther, Phylome, RoundUp, TreeFam
202	FBgn0027657	glob1	FastLMM	1	0	0	0	0	0	0	FBGN0027657	glob1	41930	FBgn0027657	glob1	Human	3048	4832	HBG2	5	4.79	moderate	No	Yes	Compara, eggNOG, Inparanoid, OrthoFinder, Phylome
202	FBgn0027657	glob1	FastLMM	1	0	0	0	0	0	0	FBGN0027657	glob1	41930	FBgn0027657	glob1	Human	3046	4830	HBE1	5	4.79	moderate	No	Yes	Compara, eggNOG, Inparanoid, OrthoFinder, Phylome
202	FBgn0027657	glob1	FastLMM	1	0	0	0	0	0	0	FBGN0027657	glob1	41930	FBgn0027657	glob1	Human	3047	4831	HBG1	5	4.79	moderate	No	Yes	Compara, eggNOG, Inparanoid, OrthoFinder, Phylome
202	FBgn0027657	glob1	FastLMM	1	0	0	0	0	0	0	FBGN0027657	glob1	41930	FBgn0027657	glob1	Human	3043	4827	HBB	4	3.88	moderate	No	Yes	Compara, eggNOG, Inparanoid, OrthoFinder
202	FBgn0027657	glob1	FastLMM	1	0	0	0	0	0	0	FBGN0027657	glob1	41930	FBgn0027657	glob1	Human	3040	4824	HBA2	4	3.79	moderate	No	Yes	Compara, eggNOG, Inparanoid, Phylome
202	FBgn0027657	glob1	FastLMM	1	0	0	0	0	0	0	FBGN0027657	glob1	41930	FBgn0027657	glob1	Human	3050	4835	HBZ	4	3.79	moderate	No	Yes	Compara, eggNOG, Inparanoid, Phylome
202	FBgn0027657	glob1	FastLMM	1	0	0	0	0	0	0	FBGN0027657	glob1	41930	FBgn0027657	glob1	Human	4151	6915	MB	4	3.79	moderate	No	Yes	Compara, eggNOG, Inparanoid, Phylome
202	FBgn0027657	glob1	FastLMM	1	0	0	0	0	0	0	FBGN0027657	glob1	41930	FBgn0027657	glob1	Human	3049	4833	HBQ1	4	3.79	moderate	No	Yes	Compara, eggNOG, Inparanoid, Phylome
202	FBgn0027657	glob1	FastLMM	1	0	0	0	0	0	0	FBGN0027657	glob1	41930	FBgn0027657	glob1	Human	3042	4826	HBM	4	3.75	moderate	No	Yes	Compara, eggNOG, OrthoDB, Phylome
202	FBgn0027657	glob1	FastLMM	1	0	0	0	0	0	0	FBGN0027657	glob1	41930	FBgn0027657	glob1	Human	3045	4829	HBD	3	2.95	moderate	No	Yes	eggNOG, Inparanoid, OrthoFinder
202	FBgn0027657	glob1	FastLMM	1	0	0	0	0	0	0	FBGN0027657	glob1	41930	FBgn0027657	glob1	Human	3039	4823	HBA1	2	1.83	moderate	No	Yes	Compara, eggNOG
204	FBgn0264000	GluRIB	FastLMM	0	0	0	0	0	1	0	FBGN0264000	GluRIB	44484	FBgn0264000	GluRIB	Human	2892	4573	GRIA3	12	11.86	moderate	Yes	No	Compara, eggNOG, Hieranoid, Homologene, Inparanoid, OMA, OrthoDB, OrthoFinder, OrthoInspector, orthoMCL, Panther, TreeFam
204	FBgn0264000	GluRIB	FastLMM	0	0	0	0	0	1	0	FBGN0264000	GluRIB	44484	FBgn0264000	GluRIB	Human	2890	4571	GRIA1	11	10.86	moderate	No	No	Compara, eggNOG, Hieranoid, Inparanoid, OMA, OrthoDB, OrthoFinder, OrthoInspector, orthoMCL, Panther, TreeFam
204	FBgn0264000	GluRIB	FastLMM	0	0	0	0	0	1	0	FBGN0264000	GluRIB	44484	FBgn0264000	GluRIB	Human	2891	4572	GRIA2	10	9.85	moderate	No	No	Compara, eggNOG, Hieranoid, Inparanoid, OMA, OrthoFinder, OrthoInspector, orthoMCL, Panther, TreeFam
204	FBgn0264000	GluRIB	FastLMM	0	0	0	0	0	1	0	FBGN0264000	GluRIB	44484	FBgn0264000	GluRIB	Human	116444	16768	GRIN3B	2	1.83	moderate	No	Yes	Compara, eggNOG
205	FBgn0046113	GluRIIC	FastLMM	0	0	0	0	1	0	0	FBGN0046113	GluRIIC	33275	FBgn0046113	GluRIIC	Human	2898	4580	GRIK2	4	3.94	moderate	Yes	No	Compara, eggNOG, OrthoDB, Panther
205	FBgn0046113	GluRIIC	FastLMM	0	0	0	0	1	0	0	FBGN0046113	GluRIIC	33275	FBgn0046113	GluRIIC	Human	2897	4579	GRIK1	4	3.94	moderate	Yes	No	Compara, eggNOG, OrthoDB, Panther
205	FBgn0046113	GluRIIC	FastLMM	0	0	0	0	1	0	0	FBGN0046113	GluRIIC	33275	FBgn0046113	GluRIIC	Human	2900	4582	GRIK4	4	3.94	moderate	Yes	No	Compara, eggNOG, OrthoDB, Panther
205	FBgn0046113	GluRIIC	FastLMM	0	0	0	0	1	0	0	FBGN0046113	GluRIIC	33275	FBgn0046113	GluRIIC	Human	2899	4581	GRIK3	4	3.94	moderate	Yes	No	Compara, eggNOG, OrthoDB, Panther
205	FBgn0046113	GluRIIC	FastLMM	0	0	0	0	1	0	0	FBGN0046113	GluRIIC	33275	FBgn0046113	GluRIIC	Human	116444	16768	GRIN3B	2	1.83	moderate	No	Yes	Compara, eggNOG
206	FBgn0264574	Glut1	FastLMM	0	0	1	0	0	0	0	FBGN0264574	Glut1	38109	FBgn0264574	Glut1	Human	6517	11009	SLC2A4	9	9.01	moderate	No	Yes	eggNOG, Inparanoid, OMA, OrthoDB, OrthoFinder, OrthoInspector, Panther, Phylome, RoundUp
206	FBgn0264574	Glut1	FastLMM	0	0	1	0	0	0	0	FBGN0264574	Glut1	38109	FBgn0264574	Glut1	Human	144195	18301	SLC2A14	8	7.98	moderate	No	Yes	eggNOG, Inparanoid, OMA, OrthoDB, OrthoFinder, OrthoInspector, Panther, Phylome
206	FBgn0264574	Glut1	FastLMM	0	0	1	0	0	0	0	FBGN0264574	Glut1	38109	FBgn0264574	Glut1	Human	6514	11006	SLC2A2	7	6.97	moderate	No	Yes	eggNOG, Inparanoid, OrthoDB, OrthoFinder, OrthoInspector, Panther, Phylome
206	FBgn0264574	Glut1	FastLMM	0	0	1	0	0	0	0	FBGN0264574	Glut1	38109	FBgn0264574	Glut1	Human	6518	11010	SLC2A5	4	3.96	moderate	No	No	eggNOG, Inparanoid, OrthoDB, OrthoFinder
208	FBgn0035142	hipk	FastLMM	0	0	0	0	0	0	1	FBGN0035142	Hipk	38070	FBgn0035142	Hipk	Human	204851	19006	HIPK1	11	10.86	moderate	No	Yes	eggNOG, Hieranoid, Inparanoid, OrthoDB, OrthoFinder, OrthoInspector, orthoMCL, Panther, Phylome, RoundUp, TreeFam
208	FBgn0035142	hipk	FastLMM	0	0	0	0	0	0	1	FBGN0035142	Hipk	38070	FBgn0035142	Hipk	Human	147746	19007	HIPK4	3	3.01	moderate	No	Yes	eggNOG, OrthoDB, Panther
210	FBgn0038922	CG6439	FastLMM	0	0	0	0	0	0	1	FBGN0038922	Idh3b	42586	FBgn0038922	Idh3b	Human	3421	5386	IDH3G	4	3.81	moderate	No	No	eggNOG, OrthoDB, OrthoFinder, orthoMCL
213	FBgn0052082	CG32082	FastLMM	0	0	0	1	0	0	0	FBGN0052082	IRSp53	39258	FBgn0052082	IRSp53	Human	55971	21649	BAIAP2L1	8	7.96	moderate	No	Yes	Compara, Inparanoid, OMA, OrthoFinder, OrthoInspector, Panther, Phylome, TreeFam
213	FBgn0052082	CG32082	FastLMM	0	0	0	1	0	0	0	FBGN0052082	IRSp53	39258	FBgn0052082	IRSp53	Human	80115	26203	BAIAP2L2	6	5.95	moderate	No	Yes	Compara, Inparanoid, OrthoInspector, Panther, Phylome, TreeFam
215	FBgn0015396	jumu	FastLMM	0	0	0	1	0	0	1	FBGN0015396	jumu	41265	FBgn0015396	jumu	Human	8456	12765	FOXN1	5	4.92	moderate	No	Yes	Compara, Hieranoid, OrthoInspector, RoundUp, TreeFam
217	FBgn0027596	CG10249	FastLMM	0	0	0	0	0	0	1	FBGN0027596	Kank	36668	FBgn0027596	Kank	Human	163782	27263	KANK4	7	6.95	moderate	No	Yes	Compara, eggNOG, Inparanoid, OrthoDB, OrthoInspector, Panther, TreeFam
217	FBgn0027596	CG10249	FastLMM	0	0	0	0	0	0	1	FBGN0027596	Kank	36668	FBgn0027596	Kank	Human	256949	24796	KANK3	7	6.93	moderate	No	Yes	Compara, eggNOG, OrthoDB, OrthoInspector, Panther, RoundUp, TreeFam
219	FBgn0285943	CG7813	FastLMM	0	0	0	0	0	1	0	FBGN0285943	knon	36845	FBgn0285943	knon	Human	10476	845	ATP5PD	7	6.85	moderate	Yes	No	Compara, eggNOG, Isobase, OrthoDB, OrthoFinder, Panther, TreeFam
220	FBgn0086372	lap	FastLMM	0	0	0	0	0	0	1	FBGN0086372	lap	40863	FBgn0086372	lap	Human	9892	14986	SNAP91	12	11.79	moderate	No	Yes	Compara, eggNOG, Hieranoid, Inparanoid, OrthoDB, OrthoFinder, OrthoInspector, orthoMCL, Panther, Phylome, RoundUp, TreeFam
221	FBgn0000464	Lar	FastLMM	0	0	0	0	0	0	1	FBGN0000464	Lar	35259	FBgn0000464	Lar	Human	5792	9670	PTPRF	11	10.86	moderate	No	Yes	eggNOG, Hieranoid, Inparanoid, OMA, OrthoFinder, OrthoInspector, orthoMCL, Panther, Phylome, RoundUp, TreeFam
221	FBgn0000464	Lar	FastLMM	0	0	0	0	0	0	1	FBGN0000464	Lar	35259	FBgn0000464	Lar	Human	5802	9681	PTPRS	10	9.76	moderate	No	Yes	eggNOG, Hieranoid, Inparanoid, OMA, OrthoFinder, OrthoInspector, orthoMCL, Phylome, RoundUp, TreeFam
221	FBgn0000464	Lar	FastLMM	0	0	0	0	0	0	1	FBGN0000464	Lar	35259	FBgn0000464	Lar	Human	5786	9664	PTPRA	2	2	moderate	No	Yes	eggNOG, Panther
221	FBgn0000464	Lar	FastLMM	0	0	0	0	0	0	1	FBGN0000464	Lar	35259	FBgn0000464	Lar	Human	5791	9669	PTPRE	2	2	moderate	No	Yes	eggNOG, Panther
223	FBgn0052105	CG32105	FastLMM	0	1	0	0	1	0	0	FBGN0052105	Lmx1a	39406	FBgn0052105	Lmx1a	Human	4009	6653	LMX1A	11	10.86	moderate	No	Yes	eggNOG, Hieranoid, Inparanoid, OrthoDB, OrthoFinder, OrthoInspector, orthoMCL, Panther, Phylome, RoundUp, TreeFam
234	FBgn0015513	mbc	FastLMM	0	0	0	1	0	0	0	FBGN0015513	mbc	42817	FBgn0015513	mbc	Human	1794	2988	DOCK2	12	11.71	moderate	No	Yes	Compara, eggNOG, Hieranoid, Inparanoid, Isobase, OMA, OrthoFinder, OrthoInspector, orthoMCL, Panther, Phylome, TreeFam
234	FBgn0015513	mbc	FastLMM	0	0	0	1	0	0	0	FBGN0015513	mbc	42817	FBgn0015513	mbc	Human	80005	23476	DOCK5	11	10.84	moderate	No	Yes	eggNOG, Hieranoid, Inparanoid, OMA, OrthoDB, OrthoFinder, OrthoInspector, orthoMCL, Panther, Phylome, TreeFam
234	FBgn0015513	mbc	FastLMM	0	0	0	1	0	0	0	FBGN0015513	mbc	42817	FBgn0015513	mbc	Human	1795	2989	DOCK3	5	4.84	moderate	No	No	eggNOG, OrthoDB, OrthoFinder, orthoMCL, RoundUp
234	FBgn0015513	mbc	FastLMM	0	0	0	1	0	0	0	FBGN0015513	mbc	42817	FBgn0015513	mbc	Human	9732	19192	DOCK4	4	3.94	moderate	No	No	eggNOG, OrthoDB, OrthoFinder, RoundUp
235	FBgn0011656	Mef2	FastLMM	0	0	0	0	0	1	0	FBGN0011656	Mef2	36032	FBgn0011656	Mef2	Human	4209	6997	MEF2D	10	9.9	moderate	No	Yes	eggNOG, Hieranoid, Inparanoid, Isobase, OrthoFinder, OrthoInspector, Panther, Phylome, RoundUp, TreeFam
235	FBgn0011656	Mef2	FastLMM	0	0	0	0	0	1	0	FBGN0011656	Mef2	36032	FBgn0011656	Mef2	Human	100271849	6995	MEF2B	5	4.94	moderate	No	Yes	eggNOG, OrthoFinder, Panther, Phylome, RoundUp
235	FBgn0011656	Mef2	FastLMM	0	0	0	0	0	1	0	FBGN0011656	Mef2	36032	FBgn0011656	Mef2	Human	4207	39979	BORCS8-MEF2B	3	3	moderate	No	Yes	eggNOG, OrthoFinder, Panther
237	FBgn0051004	CG31004	FastLMM	0	0	1	0	0	0	0	FBGN0051004	mesh	43688	FBgn0051004	mesh	Human	4585	7514	MUC4	3	2.94	moderate	No	Yes	Compara, Panther, Phylome
238	FBgn0266757	mfr	FastLMM	0	0	0	0	0	0	1	FBGN0266757	mfr	39016	FBgn0266757	mfr	Human	9381	8515	OTOF	11	10.77	moderate	No	Yes	Compara, eggNOG, Hieranoid, Inparanoid, OMA, OrthoDB, OrthoInspector, orthoMCL, Panther, Phylome, TreeFam
238	FBgn0266757	mfr	FastLMM	0	0	0	0	0	0	1	FBGN0266757	mfr	39016	FBgn0266757	mfr	Human	8291	3097	DYSF	8	7.82	moderate	No	Yes	Compara, eggNOG, Inparanoid, OrthoDB, OrthoFinder, OrthoInspector, orthoMCL, RoundUp
238	FBgn0266757	mfr	FastLMM	0	0	0	0	0	0	1	FBGN0266757	mfr	39016	FBgn0266757	mfr	Human	26509	3656	MYOF	8	7.82	moderate	No	Yes	Compara, eggNOG, Inparanoid, OrthoDB, OrthoFinder, OrthoInspector, orthoMCL, RoundUp
238	FBgn0266757	mfr	FastLMM	0	0	0	0	0	0	1	FBGN0266757	mfr	39016	FBgn0266757	mfr	Human	90342	19044	FER1L5	5	4.99	moderate	No	Yes	Compara, Inparanoid, OrthoDB, OrthoFinder, OrthoInspector
238	FBgn0266757	mfr	FastLMM	0	0	0	0	0	0	1	FBGN0266757	mfr	39016	FBgn0266757	mfr	Human	80307	15801	FER1L4	4	4.06	moderate	No	Yes	Inparanoid, OrthoInspector, Panther, Phylome
246	FBgn0014343	mirr	FastLMM	0	0	0	0	1	0	0	FBGN0014343	mirr	39441	FBgn0014343	mirr	Human	79190	14675	IRX6	9	9.05	moderate	Yes	No	eggNOG, Hieranoid, Inparanoid, OrthoDB, OrthoFinder, OrthoInspector, Panther, RoundUp, TreeFam
246	FBgn0014343	mirr	FastLMM	0	0	0	0	1	0	0	FBGN0014343	mirr	39441	FBgn0014343	mirr	Human	50805	6129	IRX4	8	8.09	moderate	No	No	eggNOG, Hieranoid, Inparanoid, OrthoDB, OrthoFinder, OrthoInspector, Panther, RoundUp
246	FBgn0014343	mirr	FastLMM	0	0	0	0	1	0	0	FBGN0014343	mirr	39441	FBgn0014343	mirr	Human	79192	14358	IRX1	5	5	moderate	No	Yes	eggNOG, OrthoDB, Panther, RoundUp, TreeFam
246	FBgn0014343	mirr	FastLMM	0	0	0	0	1	0	0	FBGN0014343	mirr	39441	FBgn0014343	mirr	Human	79191	14360	IRX3	5	5	moderate	No	Yes	eggNOG, OrthoDB, Panther, RoundUp, TreeFam
246	FBgn0014343	mirr	FastLMM	0	0	0	0	1	0	0	FBGN0014343	mirr	39441	FBgn0014343	mirr	Human	10265	14361	IRX5	5	4.89	moderate	No	Yes	eggNOG, orthoMCL, Panther, RoundUp, TreeFam
248	FBgn0259483	Mob4	FastLMM	0	0	1	0	0	0	0	FBGN0259483	Mob4	35576	FBgn0259483	Mob4	Human	100529241	49184	HSPE1-MOB4	7	6.94	moderate	No	Yes	Compara, eggNOG, Hieranoid, OMA, OrthoFinder, OrthoInspector, Panther
249	FBgn0260660	mp	FastLMM	0	0	0	1	0	0	0	FBGN0260660	Mp	38769	FBgn0260660	Mp	Human	80781	2195	COL18A1	6	5.78	moderate	No	Yes	eggNOG, Hieranoid, OrthoDB, OrthoInspector, Phylome, TreeFam
250	FBgn0011666	msi	FastLMM	1	0	0	0	0	0	0	FBGN0011666	msi	43087	FBgn0011666	msi	Human	124540	18585	MSI2	5	4.68	moderate	Yes	No	Compara, eggNOG, Isobase, OrthoFinder, orthoMCL
251	FBgn0035331	DmsR-1	FastLMM	0	0	1	0	0	0	0	FBGN0035331	MsR1	38298	FBgn0035331	MsR1	Human	124274	19995	GPR139	2	2.06	moderate	Yes	No	Inparanoid, OrthoDB
252	FBgn0259735	CG42389	FastLMM	0	0	0	0	0	0	1	FBGN0259735	CG42389	34987	FBgn0259735	mtgo	Human	64778	24670	FNDC3B	9	8.85	moderate	No	Yes	Compara, Hieranoid, Inparanoid, OrthoFinder, OrthoInspector, orthoMCL, Panther, Phylome, TreeFam
253	FBgn0028956	mthl3	FastLMM	0	1	0	0	1	0	0	FBGN0028956	mthl3	36961	FBgn0028956	mthl3	Human	84873	19241	ADGRG7	2	1.85	moderate	Yes	No	eggNOG, Isobase
258	FBgn0028875	nAcRalpha-34E	FastLMM	0	0	0	0	0	0	1	FBGN0028875	nAChRalpha5	34826	FBgn0028875	nAChRalpha5	Human	89832	15781	CHRFAM7A	11	10.8	moderate	Yes	No	eggNOG, Hieranoid, Inparanoid, Isobase, OrthoFinder, OrthoInspector, orthoMCL, Panther, Phylome, RoundUp, TreeFam
258	FBgn0028875	nAcRalpha-34E	FastLMM	0	0	0	0	0	0	1	FBGN0028875	nAChRalpha5	34826	FBgn0028875	nAChRalpha5	Human	1139	1960	CHRNA7	8	7.82	moderate	No	Yes	eggNOG, Homologene, Isobase, OrthoDB, OrthoFinder, orthoMCL, Panther, TreeFam
259	FBgn0083963	CG34127	FastLMM	0	0	1	0	0	0	0	FBGN0083963	Nlg3	40912	FBgn0083963	Nlg3	Human	57502	14287	NLGN4X	11	10.89	moderate	No	Yes	Compara, eggNOG, Hieranoid, Inparanoid, OrthoDB, OrthoFinder, OrthoInspector, Panther, Phylome, RoundUp, TreeFam
259	FBgn0083963	CG34127	FastLMM	0	0	1	0	0	0	0	FBGN0083963	Nlg3	40912	FBgn0083963	Nlg3	Human	22871	14291	NLGN1	11	10.89	moderate	No	Yes	Compara, eggNOG, Hieranoid, Inparanoid, OrthoDB, OrthoFinder, OrthoInspector, Panther, Phylome, RoundUp, TreeFam
259	FBgn0083963	CG34127	FastLMM	0	0	1	0	0	0	0	FBGN0083963	Nlg3	40912	FBgn0083963	Nlg3	Human	22829	15529	NLGN4Y	10	9.97	moderate	No	Yes	Compara, Hieranoid, Inparanoid, OMA, OrthoDB, OrthoFinder, OrthoInspector, Panther, Phylome, TreeFam
259	FBgn0083963	CG34127	FastLMM	0	0	1	0	0	0	0	FBGN0083963	Nlg3	40912	FBgn0083963	Nlg3	Human	57555	14290	NLGN2	10	9.9	moderate	No	Yes	Compara, eggNOG, Hieranoid, Homologene, Inparanoid, OrthoDB, OrthoFinder, OrthoInspector, Panther, Phylome
259	FBgn0083963	CG34127	FastLMM	0	0	1	0	0	0	0	FBGN0083963	Nlg3	40912	FBgn0083963	Nlg3	Human	1056	1848	CEL	4	3.94	moderate	No	Yes	Compara, eggNOG, OrthoDB, Panther
260	FBgn0083975	CG34139	FastLMM	0	0	0	1	0	0	0	FBGN0083975	Nlg4	42402	FBgn0083975	Nlg4	Human	54413	14289	NLGN3	9	8.93	moderate	Yes	No	eggNOG, Hieranoid, Homologene, Inparanoid, OrthoDB, OrthoFinder, Panther, Phylome, TreeFam
260	FBgn0083975	CG34139	FastLMM	0	0	0	1	0	0	0	FBGN0083975	Nlg4	42402	FBgn0083975	Nlg4	Human	57502	14287	NLGN4X	8	7.93	moderate	No	No	eggNOG, Hieranoid, Inparanoid, OrthoDB, OrthoFinder, Panther, Phylome, TreeFam
260	FBgn0083975	CG34139	FastLMM	0	0	0	1	0	0	0	FBGN0083975	Nlg4	42402	FBgn0083975	Nlg4	Human	22871	14291	NLGN1	8	7.93	moderate	No	No	eggNOG, Hieranoid, Inparanoid, OrthoDB, OrthoFinder, Panther, Phylome, TreeFam
260	FBgn0083975	CG34139	FastLMM	0	0	0	1	0	0	0	FBGN0083975	Nlg4	42402	FBgn0083975	Nlg4	Human	22829	15529	NLGN4Y	7	7.03	moderate	No	No	Hieranoid, Inparanoid, OrthoDB, OrthoFinder, Panther, Phylome, TreeFam
260	FBgn0083975	CG34139	FastLMM	0	0	0	1	0	0	0	FBGN0083975	Nlg4	42402	FBgn0083975	Nlg4	Human	57555	14290	NLGN2	7	6.97	moderate	No	No	eggNOG, Hieranoid, Inparanoid, OrthoDB, OrthoFinder, Panther, Phylome
263	FBgn0085424	nub	FastLMM	0	0	1	0	0	0	0	FBGN0085424	nub	34669	FBgn0085424	nub	Human	25833	19864	POU2F3	6	5.93	moderate	No	No	Compara, eggNOG, Hieranoid, OrthoFinder, OrthoInspector, Panther
263	FBgn0085424	nub	FastLMM	0	0	1	0	0	0	0	FBGN0085424	nub	34669	FBgn0085424	nub	Human	134187	26367	POU5F2	3	2.93	moderate	No	Yes	Compara, eggNOG, Panther
263	FBgn0085424	nub	FastLMM	0	0	1	0	0	0	0	FBGN0085424	nub	34669	FBgn0085424	nub	Human	5460	9221	POU5F1	3	2.93	moderate	No	Yes	Compara, eggNOG, Panther
263	FBgn0085424	nub	FastLMM	0	0	1	0	0	0	0	FBGN0085424	nub	34669	FBgn0085424	nub	Human	5462	9223	POU5F1B	3	2.93	moderate	No	Yes	Compara, eggNOG, Panther
265	FBgn0283508	CG43164	FastLMM	0	0	0	0	0	1	0	FBGN0283508	nw	3772015	FBgn0283508	nw	Human	5967	9951	REG1A	2	1.92	moderate	Yes	No	OrthoDB, Phylome
266	FBgn0038653	CG18208	FastLMM	0	1	0	0	1	0	0	FBGN0038653	Octalpha2R	42258	FBgn0038653	Octalpha2R	Human	151	282	ADRA2B	6	5.98	moderate	No	Yes	eggNOG, Inparanoid, OMA, OrthoDB, Panther, Phylome
266	FBgn0038653	CG18208	FastLMM	0	1	0	0	1	0	0	FBGN0038653	Octalpha2R	42258	FBgn0038653	Octalpha2R	Human	152	283	ADRA2C	5	4.97	moderate	No	Yes	eggNOG, Inparanoid, OrthoDB, Panther, Phylome
267	FBgn0037153	olf413	FastLMM	0	0	0	0	0	1	0	FBGN0037153	olf413	40453	FBgn0037153	olf413	Human	26002	21063	MOXD1	10	9.79	moderate	Yes	No	Compara, eggNOG, Homologene, Isobase, OrthoDB, OrthoFinder, Panther, Phylome, RoundUp, TreeFam
267	FBgn0037153	olf413	FastLMM	0	0	0	0	0	1	0	FBGN0037153	olf413	40453	FBgn0037153	olf413	Human	100289017	33605	MOXD2P	2	2.01	moderate	No	Yes	Panther, Phylome
271	FBgn0260753	Pdfr	FastLMM	0	0	0	1	0	0	0	FBGN0260753	Pdfr	31234	FBgn0260753	Pdfr	Human	799	1440	CALCR	5	4.78	moderate	Yes	No	eggNOG, Isobase, OrthoFinder, orthoMCL, RoundUp
271	FBgn0260753	Pdfr	FastLMM	0	0	0	1	0	0	0	FBGN0260753	Pdfr	31234	FBgn0260753	Pdfr	Human	7433	12694	VIPR1	3	3.01	moderate	No	Yes	eggNOG, OrthoDB, Panther
271	FBgn0260753	Pdfr	FastLMM	0	0	0	1	0	0	0	FBGN0260753	Pdfr	31234	FBgn0260753	Pdfr	Human	2740	4324	GLP1R	3	3.01	moderate	No	Yes	eggNOG, OrthoDB, Panther
271	FBgn0260753	Pdfr	FastLMM	0	0	0	1	0	0	0	FBGN0260753	Pdfr	31234	FBgn0260753	Pdfr	Human	5745	9608	PTH1R	3	3.01	moderate	No	Yes	eggNOG, OrthoDB, Panther
271	FBgn0260753	Pdfr	FastLMM	0	0	0	1	0	0	0	FBGN0260753	Pdfr	31234	FBgn0260753	Pdfr	Human	6344	10608	SCTR	3	3.01	moderate	No	Yes	eggNOG, OrthoDB, Panther
271	FBgn0260753	Pdfr	FastLMM	0	0	0	1	0	0	0	FBGN0260753	Pdfr	31234	FBgn0260753	Pdfr	Human	2696	4271	GIPR	3	3.01	moderate	No	Yes	eggNOG, OrthoDB, Panther
271	FBgn0260753	Pdfr	FastLMM	0	0	0	1	0	0	0	FBGN0260753	Pdfr	31234	FBgn0260753	Pdfr	Human	9340	4325	GLP2R	3	3.01	moderate	No	Yes	eggNOG, OrthoDB, Panther
271	FBgn0260753	Pdfr	FastLMM	0	0	0	1	0	0	0	FBGN0260753	Pdfr	31234	FBgn0260753	Pdfr	Human	5746	9609	PTH2R	3	3.01	moderate	No	Yes	eggNOG, OrthoDB, Panther
271	FBgn0260753	Pdfr	FastLMM	0	0	0	1	0	0	0	FBGN0260753	Pdfr	31234	FBgn0260753	Pdfr	Human	2692	4266	GHRHR	3	3.01	moderate	No	Yes	eggNOG, OrthoDB, Panther
271	FBgn0260753	Pdfr	FastLMM	0	0	0	1	0	0	0	FBGN0260753	Pdfr	31234	FBgn0260753	Pdfr	Human	117	242	ADCYAP1R1	3	3.01	moderate	No	Yes	eggNOG, OrthoDB, Panther
271	FBgn0260753	Pdfr	FastLMM	0	0	0	1	0	0	0	FBGN0260753	Pdfr	31234	FBgn0260753	Pdfr	Human	7434	12695	VIPR2	3	3.01	moderate	No	Yes	eggNOG, OrthoDB, Panther
271	FBgn0260753	Pdfr	FastLMM	0	0	0	1	0	0	0	FBGN0260753	Pdfr	31234	FBgn0260753	Pdfr	Human	2642	4192	GCGR	2	2	moderate	No	Yes	eggNOG, Panther
273	FBgn0050463	CG30463	FastLMM	0	0	1	0	0	0	0	FBGN0050463	CG30463	246627	FBgn0050463	Pgant9	Human	11227	4127	GALNT5	5	4.89	moderate	No	Yes	Compara, eggNOG, OrthoFinder, Panther, TreeFam
273	FBgn0050463	CG30463	FastLMM	0	0	1	0	0	0	0	FBGN0050463	CG30463	246627	FBgn0050463	Pgant9	Human	100528030	42957	POC1B-GALNT4	5	4.84	moderate	No	Yes	Compara, eggNOG, Hieranoid, Panther, Phylome
273	FBgn0050463	CG30463	FastLMM	0	0	1	0	0	0	0	FBGN0050463	CG30463	246627	FBgn0050463	Pgant9	Human	11226	4128	GALNT6	4	3.84	moderate	No	Yes	Compara, eggNOG, Panther, Phylome
273	FBgn0050463	CG30463	FastLMM	0	0	1	0	0	0	0	FBGN0050463	CG30463	246627	FBgn0050463	Pgant9	Human	2591	4125	GALNT3	4	3.84	moderate	No	Yes	Compara, eggNOG, Panther, Phylome
273	FBgn0050463	CG30463	FastLMM	0	0	1	0	0	0	0	FBGN0050463	CG30463	246627	FBgn0050463	Pgant9	Human	117248	21531	GALNT15	4	3.84	moderate	No	Yes	Compara, eggNOG, Panther, Phylome
273	FBgn0050463	CG30463	FastLMM	0	0	1	0	0	0	0	FBGN0050463	CG30463	246627	FBgn0050463	Pgant9	Human	114805	23242	GALNT13	4	3.73	moderate	No	No	Compara, eggNOG, OrthoFinder, orthoMCL
273	FBgn0050463	CG30463	FastLMM	0	0	1	0	0	0	0	FBGN0050463	CG30463	246627	FBgn0050463	Pgant9	Human	64409	16347	GALNT17	3	2.93	moderate	No	Yes	Compara, eggNOG, Panther
273	FBgn0050463	CG30463	FastLMM	0	0	1	0	0	0	0	FBGN0050463	CG30463	246627	FBgn0050463	Pgant9	Human	50614	4131	GALNT9	3	2.93	moderate	No	Yes	Compara, eggNOG, Panther
273	FBgn0050463	CG30463	FastLMM	0	0	1	0	0	0	0	FBGN0050463	CG30463	246627	FBgn0050463	Pgant9	Human	26290	4130	GALNT8	3	2.93	moderate	No	Yes	Compara, eggNOG, Panther
273	FBgn0050463	CG30463	FastLMM	0	0	1	0	0	0	0	FBGN0050463	CG30463	246627	FBgn0050463	Pgant9	Human	8693	4126	GALNT4	3	2.93	moderate	No	Yes	Compara, eggNOG, Panther
273	FBgn0050463	CG30463	FastLMM	0	0	1	0	0	0	0	FBGN0050463	CG30463	246627	FBgn0050463	Pgant9	Human	374378	30488	GALNT18	3	2.93	moderate	No	Yes	Compara, eggNOG, Panther
274	FBgn0264953	Piezo	FastLMM	1	0	0	0	0	0	0	FBGN0264953	Piezo	34112	FBgn0264953	Piezo	Human	9780	28993	PIEZO1	10	9.97	moderate	No	Yes	eggNOG, Hieranoid, Inparanoid, OMA, OrthoDB, OrthoInspector, Panther, Phylome, RoundUp, TreeFam
274	FBgn0264953	Piezo	FastLMM	1	0	0	0	0	0	0	FBGN0264953	Piezo	34112	FBgn0264953	Piezo	Human	100616167	41782	MIR4722	2	1.94	moderate	No	Yes	Compara, OMA
276	FBgn0031069	Pmp70	FastLMM	0	1	0	0	0	0	0	FBGN0031069	Pmp70	32992	FBgn0031069	Pmp70	Human	215	61	ABCD1	4	3.83	moderate	No	No	eggNOG, OrthoFinder, orthoMCL, RoundUp
276	FBgn0031069	Pmp70	FastLMM	0	1	0	0	0	0	0	FBGN0031069	Pmp70	32992	FBgn0031069	Pmp70	Human	225	66	ABCD2	4	3.83	moderate	No	No	eggNOG, OrthoFinder, orthoMCL, RoundUp
276	FBgn0031069	Pmp70	FastLMM	0	1	0	0	0	0	0	FBGN0031069	Pmp70	32992	FBgn0031069	Pmp70	Human	5826	68	ABCD4	3	2.81	moderate	No	Yes	eggNOG, OrthoDB, orthoMCL
277	FBgn0029903	pod1	FastLMM	0	0	0	0	0	1	0	FBGN0029903	pod1	31620	FBgn0029903	pod1	Human	79585	26161	CORO7	9	8.75	moderate	No	Yes	Compara, eggNOG, Homologene, Isobase, OMA, OrthoFinder, orthoMCL, Panther, TreeFam
280	FBgn0004595	pros	FastLMM	0	0	0	0	0	1	0	FBGN0004595	pros	41363	FBgn0004595	pros	Human	283571	26715	PROX2	8	7.92	moderate	No	Yes	Compara, eggNOG, Hieranoid, OrthoFinder, OrthoInspector, Panther, RoundUp, TreeFam
281	FBgn0003169	put	FastLMM	0	0	1	0	0	0	0	FBGN0003169	put	41772	FBgn0003169	put	Human	7048	11773	TGFBR2	3	2.93	moderate	No	Yes	Compara, eggNOG, Panther
281	FBgn0003169	put	FastLMM	0	0	1	0	0	0	0	FBGN0003169	put	41772	FBgn0003169	put	Human	269	465	AMHR2	2	1.83	moderate	No	Yes	Compara, eggNOG
283	FBgn0014009	Rab2	FastLMM	0	0	1	0	0	0	0	FBGN0014009	Rab2	35577	FBgn0014009	Rab2	Human	84932	20246	RAB2B	9	8.71	moderate	No	Yes	Compara, eggNOG, Hieranoid, OrthoDB, OrthoFinder, orthoMCL, Panther, Phylome, TreeFam
284	FBgn0015286	Rala	FastLMM	0	1	0	0	0	0	0	FBGN0015286	Rala	31332	FBgn0015286	Rala	Human	5899	9840	RALB	9	8.93	moderate	No	Yes	eggNOG, Hieranoid, Inparanoid, OrthoDB, OrthoFinder, OrthoInspector, Panther, Phylome, TreeFam
286	FBgn0004244	Rdl	FastLMM	0	0	0	1	0	0	1	FBGN0004244	Rdl	39054	FBgn0004244	Rdl	Human	441509	31715	GLRA4	4	3.8	moderate	Yes	No	eggNOG, Homologene, OrthoFinder, orthoMCL
286	FBgn0004244	Rdl	FastLMM	0	0	0	1	0	0	1	FBGN0004244	Rdl	39054	FBgn0004244	Rdl	Human	200959	17969	GABRR3	3	3.01	moderate	No	Yes	eggNOG, OrthoDB, Panther
286	FBgn0004244	Rdl	FastLMM	0	0	0	1	0	0	1	FBGN0004244	Rdl	39054	FBgn0004244	Rdl	Human	2563	4084	GABRD	3	3.01	moderate	No	Yes	eggNOG, OrthoDB, Panther
286	FBgn0004244	Rdl	FastLMM	0	0	0	1	0	0	1	FBGN0004244	Rdl	39054	FBgn0004244	Rdl	Human	2570	4091	GABRR2	3	2.96	moderate	No	Yes	eggNOG, Panther, TreeFam
286	FBgn0004244	Rdl	FastLMM	0	0	0	1	0	0	1	FBGN0004244	Rdl	39054	FBgn0004244	Rdl	Human	2569	4090	GABRR1	3	2.96	moderate	No	Yes	eggNOG, Panther, TreeFam
287	FBgn0264493	rdx	FastLMM	1	1	0	0	1	0	0	FBGN0264493	rdx	41704	FBgn0264493	rdx	Human	339745	27934	SPOPL	9	8.81	moderate	No	Yes	eggNOG, OMA, OrthoFinder, OrthoInspector, orthoMCL, Panther, Phylome, RoundUp, TreeFam
288	FBgn0285913	CG12207	FastLMM	0	0	0	0	0	0	1	FBGN0285913	red	41738	FBgn0285913	red	Human	388695	32070	LYSMD1	6	6	moderate	No	Yes	OrthoFinder, OrthoInspector, Panther, Phylome, RoundUp, TreeFam
289	FBgn0020379	Rfx	FastLMM	0	1	0	1	0	0	1	FBGN0020379	Rfx	41266	FBgn0020379	Rfx	Human	5989	9982	RFX1	12	11.79	moderate	No	Yes	Compara, eggNOG, Hieranoid, Inparanoid, OrthoDB, OrthoFinder, OrthoInspector, orthoMCL, Panther, Phylome, RoundUp, TreeFam
289	FBgn0020379	Rfx	FastLMM	0	1	0	1	0	0	1	FBGN0020379	Rfx	41266	FBgn0020379	Rfx	Human	5990	9983	RFX2	12	11.79	moderate	No	Yes	Compara, eggNOG, Hieranoid, Inparanoid, OrthoDB, OrthoFinder, OrthoInspector, orthoMCL, Panther, Phylome, RoundUp, TreeFam
289	FBgn0020379	Rfx	FastLMM	0	1	0	1	0	0	1	FBGN0020379	Rfx	41266	FBgn0020379	Rfx	Human	5992	9985	RFX4	4	3.94	moderate	No	Yes	eggNOG, OrthoDB, OrthoFinder, RoundUp
289	FBgn0020379	Rfx	FastLMM	0	1	0	1	0	0	1	FBGN0020379	Rfx	41266	FBgn0020379	Rfx	Human	222546	21478	RFX6	2	1.91	moderate	No	Yes	eggNOG, OrthoDB
289	FBgn0020379	Rfx	FastLMM	0	1	0	1	0	0	1	FBGN0020379	Rfx	41266	FBgn0020379	Rfx	Human	731220	37253	RFX8	2	1.91	moderate	No	Yes	eggNOG, OrthoDB
290	FBgn0028699	Rh50	FastLMM	0	0	0	0	1	0	0	FBGN0028699	Rh50	38589	FBgn0028699	Rh50	Human	6005	10006	RHAG	12	11.75	moderate	No	Yes	Compara, eggNOG, Hieranoid, OMA, OrthoDB, OrthoFinder, OrthoInspector, orthoMCL, Panther, Phylome, RoundUp, TreeFam
290	FBgn0028699	Rh50	FastLMM	0	0	0	0	1	0	0	FBGN0028699	Rh50	38589	FBgn0028699	Rh50	Human	51458	18140	RHCG	11	10.76	moderate	No	Yes	Compara, eggNOG, Hieranoid, Inparanoid, OrthoDB, OrthoFinder, OrthoInspector, orthoMCL, Panther, Phylome, TreeFam
290	FBgn0028699	Rh50	FastLMM	0	0	0	0	1	0	0	FBGN0028699	Rh50	38589	FBgn0028699	Rh50	Human	6006	10008	RHCE	6	5.85	moderate	No	Yes	Compara, eggNOG, OrthoDB, OrthoFinder, Panther, Phylome
290	FBgn0028699	Rh50	FastLMM	0	0	0	0	1	0	0	FBGN0028699	Rh50	38589	FBgn0028699	Rh50	Human	6007	10009	RHD	6	5.85	moderate	No	Yes	Compara, eggNOG, OrthoDB, OrthoFinder, Panther, Phylome
291	FBgn0031118	RhoGAP19D	FastLMM	0	0	0	0	0	0	1	FBGN0031118	RhoGAP19D	33048	FBgn0031118	RhoGAP19D	Human	57584	23725	ARHGAP21	7	6.84	moderate	No	Yes	eggNOG, Inparanoid, OrthoFinder, OrthoInspector, orthoMCL, RoundUp, TreeFam
293	FBgn0003255	rk	FastLMM	0	0	0	1	0	0	0	FBGN0003255	rk	34819	FBgn0003255	rk	Human	55366	13299	LGR4	7	7.02	moderate	No	Yes	eggNOG, Hieranoid, Inparanoid, OrthoDB, OrthoInspector, Panther, TreeFam
293	FBgn0003255	rk	FastLMM	0	0	0	1	0	0	0	FBGN0003255	rk	34819	FBgn0003255	rk	Human	59352	19719	LGR6	6	5.92	moderate	No	Yes	eggNOG, Hieranoid, Inparanoid, OrthoDB, OrthoInspector, TreeFam
296	FBgn0259162	RunxB	FastLMM	0	0	0	0	0	0	1	FBGN0259162	RunxB	33051	FBgn0259162	RunxB	Human	864	10473	RUNX3	5	5.05	moderate	Yes	No	eggNOG, Inparanoid, OrthoFinder, OrthoInspector, Panther
296	FBgn0259162	RunxB	FastLMM	0	0	0	0	0	0	1	FBGN0259162	RunxB	33051	FBgn0259162	RunxB	Human	860	10472	RUNX2	5	5.03	moderate	Yes	No	eggNOG, OrthoFinder, OrthoInspector, Panther, RoundUp
296	FBgn0259162	RunxB	FastLMM	0	0	0	0	0	0	1	FBGN0259162	RunxB	33051	FBgn0259162	RunxB	Human	861	10471	RUNX1	5	5.03	moderate	Yes	No	eggNOG, OrthoFinder, OrthoInspector, Panther, RoundUp
297	FBgn0003345	sd	FastLMM	0	0	0	1	0	0	0	FBGN0003345	sd	32536	FBgn0003345	sd	Human	7005	11716	TEAD3	12	11.79	moderate	No	Yes	Compara, eggNOG, Hieranoid, Inparanoid, OrthoDB, OrthoFinder, OrthoInspector, orthoMCL, Panther, Phylome, RoundUp, TreeFam
297	FBgn0003345	sd	FastLMM	0	0	0	1	0	0	0	FBGN0003345	sd	32536	FBgn0003345	sd	Human	8463	11715	TEAD2	11	10.69	moderate	No	Yes	Compara, eggNOG, Hieranoid, Inparanoid, OrthoDB, OrthoFinder, OrthoInspector, orthoMCL, Phylome, RoundUp, TreeFam
297	FBgn0003345	sd	FastLMM	0	0	0	1	0	0	0	FBGN0003345	sd	32536	FBgn0003345	sd	Human	7004	11717	TEAD4	11	10.69	moderate	No	Yes	Compara, eggNOG, Hieranoid, Inparanoid, OrthoDB, OrthoFinder, OrthoInspector, orthoMCL, Phylome, RoundUp, TreeFam
298	FBgn0010415	Sdc	FastLMM	1	1	0	0	0	0	0	FBGN0010415	Sdc	37447	FBgn0010415	Sdc	Human	9672	10660	SDC3	5	5.07	moderate	No	Yes	Compara, Inparanoid, Panther, RoundUp, TreeFam
299	FBgn0011260	Sema-2a	FastLMM	0	0	0	0	0	1	0	FBGN0011260	Sema2a	36846	FBgn0011260	Sema2a	Human	6405	10728	SEMA3F	7	6.85	moderate	No	Yes	Compara, eggNOG, Hieranoid, OMA, OrthoFinder, Panther, Phylome
299	FBgn0011260	Sema-2a	FastLMM	0	0	0	0	0	1	0	FBGN0011260	Sema2a	36846	FBgn0011260	Sema2a	Human	223117	10726	SEMA3D	7	6.85	moderate	No	Yes	Compara, eggNOG, Hieranoid, OMA, OrthoFinder, Panther, Phylome
299	FBgn0011260	Sema-2a	FastLMM	0	0	0	0	0	1	0	FBGN0011260	Sema2a	36846	FBgn0011260	Sema2a	Human	10512	10725	SEMA3C	7	6.85	moderate	No	Yes	Compara, eggNOG, Hieranoid, OMA, OrthoFinder, Panther, Phylome
299	FBgn0011260	Sema-2a	FastLMM	0	0	0	0	0	1	0	FBGN0011260	Sema2a	36846	FBgn0011260	Sema2a	Human	10507	10732	SEMA4D	7	6.81	moderate	No	Yes	Compara, eggNOG, Hieranoid, OMA, Panther, Phylome, TreeFam
299	FBgn0011260	Sema-2a	FastLMM	0	0	0	0	0	1	0	FBGN0011260	Sema2a	36846	FBgn0011260	Sema2a	Human	7869	10724	SEMA3B	6	5.92	moderate	No	Yes	eggNOG, Hieranoid, OMA, OrthoFinder, Panther, Phylome
299	FBgn0011260	Sema-2a	FastLMM	0	0	0	0	0	1	0	FBGN0011260	Sema2a	36846	FBgn0011260	Sema2a	Human	9723	10727	SEMA3E	6	5.84	moderate	No	Yes	Compara, eggNOG, Hieranoid, OrthoFinder, Panther, Phylome
299	FBgn0011260	Sema-2a	FastLMM	0	0	0	0	0	1	0	FBGN0011260	Sema2a	36846	FBgn0011260	Sema2a	Human	56920	30400	SEMA3G	6	5.84	moderate	No	Yes	Compara, eggNOG, Hieranoid, OrthoFinder, Panther, Phylome
299	FBgn0011260	Sema-2a	FastLMM	0	0	0	0	0	1	0	FBGN0011260	Sema2a	36846	FBgn0011260	Sema2a	Human	54910	10731	SEMA4C	5	4.8	moderate	No	Yes	Compara, eggNOG, Panther, Phylome, TreeFam
299	FBgn0011260	Sema-2a	FastLMM	0	0	0	0	0	1	0	FBGN0011260	Sema2a	36846	FBgn0011260	Sema2a	Human	64218	10729	SEMA4A	5	4.8	moderate	No	Yes	Compara, eggNOG, Panther, Phylome, TreeFam
299	FBgn0011260	Sema-2a	FastLMM	0	0	0	0	0	1	0	FBGN0011260	Sema2a	36846	FBgn0011260	Sema2a	Human	57715	10735	SEMA4G	5	4.8	moderate	No	Yes	Compara, eggNOG, Panther, Phylome, TreeFam
299	FBgn0011260	Sema-2a	FastLMM	0	0	0	0	0	1	0	FBGN0011260	Sema2a	36846	FBgn0011260	Sema2a	Human	10505	10734	SEMA4F	4	3.84	moderate	No	Yes	Compara, eggNOG, Panther, Phylome
299	FBgn0011260	Sema-2a	FastLMM	0	0	0	0	0	1	0	FBGN0011260	Sema2a	36846	FBgn0011260	Sema2a	Human	10509	10730	SEMA4B	4	3.84	moderate	No	Yes	Compara, eggNOG, Panther, Phylome
299	FBgn0011260	Sema-2a	FastLMM	0	0	0	0	0	1	0	FBGN0011260	Sema2a	36846	FBgn0011260	Sema2a	Human	8482	10741	SEMA7A	3	2.93	moderate	No	Yes	Compara, eggNOG, Panther
299	FBgn0011260	Sema-2a	FastLMM	0	0	0	0	0	1	0	FBGN0011260	Sema2a	36846	FBgn0011260	Sema2a	Human	102465526	50037	MIR6872	2	1.94	moderate	No	Yes	Compara, OMA
300	FBgn0036544	sff	FastLMM	0	0	0	0	0	1	0	FBGN0036544	sff	39732	FBgn0036544	sff	Human	9024	11405	BRSK2	12	11.77	moderate	No	Yes	Compara, eggNOG, Homologene, Inparanoid, OMA, OrthoDB, OrthoFinder, OrthoInspector, orthoMCL, Panther, Phylome, TreeFam
301	FBgn0052423	shep	FastLMM	0	0	0	0	0	1	0	FBGN0052423	shep	38605	FBgn0052423	shep	Human	5939	9909	RBMS2	10	9.88	moderate	No	Yes	Compara, eggNOG, Hieranoid, Inparanoid, OrthoFinder, OrthoInspector, Panther, Phylome, RoundUp, TreeFam
301	FBgn0052423	shep	FastLMM	0	0	0	0	0	1	0	FBGN0052423	shep	38605	FBgn0052423	shep	Human	5937	9907	RBMS1	10	9.85	moderate	No	Yes	eggNOG, Hieranoid, Inparanoid, OrthoFinder, OrthoInspector, orthoMCL, Panther, Phylome, RoundUp, TreeFam
302	FBgn0261698	CG42732	FastLMM	1	0	0	0	0	0	0	FBGN0261698	SLO2	5740325	FBgn0261698	SLO2	Human	343450	18866	KCNT2	13	12.8	moderate	No	Yes	Compara, eggNOG, Hieranoid, Inparanoid, OMA, OrthoDB, OrthoFinder, OrthoInspector, orthoMCL, Panther, Phylome, RoundUp, TreeFam
303	FBgn0085450	Snoo	FastLMM	0	1	1	0	0	0	0	FBGN0085450	Snoo	5740414	FBgn0085450	Snoo	Human	6498	10897	SKIL	5	4.91	moderate	No	Yes	eggNOG, OrthoFinder, OrthoInspector, Panther, Phylome
307	FBgn0036411	Sox21a	FastLMM	0	0	1	0	0	0	0	FBGN0036411	Sox21a	39567	FBgn0036411	Sox21a	Human	8403	11193	SOX14	7	6.92	moderate	Yes	No	Compara, eggNOG, OrthoFinder, OrthoInspector, Panther, RoundUp, TreeFam
307	FBgn0036411	Sox21a	FastLMM	0	0	1	0	0	0	0	FBGN0036411	Sox21a	39567	FBgn0036411	Sox21a	Human	11166	11197	SOX21	6	5.99	moderate	No	No	eggNOG, OrthoFinder, OrthoInspector, Panther, RoundUp, TreeFam
307	FBgn0036411	Sox21a	FastLMM	0	0	1	0	0	0	0	FBGN0036411	Sox21a	39567	FBgn0036411	Sox21a	Human	6666	11198	SOX12	6	5.91	moderate	No	No	Compara, eggNOG, Isobase, OrthoFinder, Panther, RoundUp
307	FBgn0036411	Sox21a	FastLMM	0	0	1	0	0	0	0	FBGN0036411	Sox21a	39567	FBgn0036411	Sox21a	Human	54345	11194	SOX18	5	4.96	moderate	No	No	Compara, eggNOG, OrthoFinder, Panther, RoundUp
307	FBgn0036411	Sox21a	FastLMM	0	0	1	0	0	0	0	FBGN0036411	Sox21a	39567	FBgn0036411	Sox21a	Human	64321	18122	SOX17	5	4.96	moderate	No	Yes	Compara, eggNOG, OrthoFinder, Panther, RoundUp
307	FBgn0036411	Sox21a	FastLMM	0	0	1	0	0	0	0	FBGN0036411	Sox21a	39567	FBgn0036411	Sox21a	Human	6657	11195	SOX2	5	4.93	moderate	No	No	Compara, eggNOG, OrthoFinder, OrthoInspector, Panther
307	FBgn0036411	Sox21a	FastLMM	0	0	1	0	0	0	0	FBGN0036411	Sox21a	39567	FBgn0036411	Sox21a	Human	6659	11200	SOX4	5	4.88	moderate	No	No	Compara, eggNOG, Isobase, OrthoFinder, Panther
307	FBgn0036411	Sox21a	FastLMM	0	0	1	0	0	0	0	FBGN0036411	Sox21a	39567	FBgn0036411	Sox21a	Human	83595	18196	SOX7	4	4.03	moderate	No	No	eggNOG, OrthoFinder, Panther, RoundUp
307	FBgn0036411	Sox21a	FastLMM	0	0	1	0	0	0	0	FBGN0036411	Sox21a	39567	FBgn0036411	Sox21a	Human	6658	11199	SOX3	4	3.93	moderate	No	No	Compara, eggNOG, OrthoFinder, Panther
307	FBgn0036411	Sox21a	FastLMM	0	0	1	0	0	0	0	FBGN0036411	Sox21a	39567	FBgn0036411	Sox21a	Human	6665	11196	SOX15	4	3.93	moderate	No	Yes	Compara, eggNOG, OrthoFinder, Panther
307	FBgn0036411	Sox21a	FastLMM	0	0	1	0	0	0	0	FBGN0036411	Sox21a	39567	FBgn0036411	Sox21a	Human	6736	11311	SRY	3	3.03	moderate	No	Yes	Compara, OrthoFinder, Panther
307	FBgn0036411	Sox21a	FastLMM	0	0	1	0	0	0	0	FBGN0036411	Sox21a	39567	FBgn0036411	Sox21a	Human	6664	11191	SOX11	3	2.93	moderate	No	Yes	Compara, eggNOG, Panther
307	FBgn0036411	Sox21a	FastLMM	0	0	1	0	0	0	0	FBGN0036411	Sox21a	39567	FBgn0036411	Sox21a	Human	11063	30635	SOX30	2	1.83	moderate	No	Yes	Compara, eggNOG
309	FBgn0003507	srp	FastLMM	0	0	1	0	0	0	0	FBGN0003507	srp	41944	FBgn0003507	srp	Human	2623	4170	GATA1	5	4.96	moderate	Yes	No	Compara, eggNOG, OrthoFinder, Panther, RoundUp
309	FBgn0003507	srp	FastLMM	0	0	1	0	0	0	0	FBGN0003507	srp	41944	FBgn0003507	srp	Human	2627	4174	GATA6	5	4.96	moderate	Yes	No	Compara, eggNOG, OrthoFinder, Panther, RoundUp
309	FBgn0003507	srp	FastLMM	0	0	1	0	0	0	0	FBGN0003507	srp	41944	FBgn0003507	srp	Human	2624	4171	GATA2	5	4.96	moderate	Yes	No	Compara, eggNOG, OrthoFinder, Panther, RoundUp
309	FBgn0003507	srp	FastLMM	0	0	1	0	0	0	0	FBGN0003507	srp	41944	FBgn0003507	srp	Human	2625	4172	GATA3	5	4.96	moderate	Yes	No	Compara, eggNOG, OrthoFinder, Panther, RoundUp
309	FBgn0003507	srp	FastLMM	0	0	1	0	0	0	0	FBGN0003507	srp	41944	FBgn0003507	srp	Human	2626	4173	GATA4	4	4.03	moderate	No	No	eggNOG, OrthoFinder, Panther, RoundUp
309	FBgn0003507	srp	FastLMM	0	0	1	0	0	0	0	FBGN0003507	srp	41944	FBgn0003507	srp	Human	140628	15802	GATA5	4	4.03	moderate	No	No	eggNOG, OrthoFinder, Panther, RoundUp
309	FBgn0003507	srp	FastLMM	0	0	1	0	0	0	0	FBGN0003507	srp	41944	FBgn0003507	srp	Human	7227	12340	TRPS1	3	2.78	moderate	No	Yes	Compara, eggNOG, Isobase
309	FBgn0003507	srp	FastLMM	0	0	1	0	0	0	0	FBGN0003507	srp	41944	FBgn0003507	srp	Human	100125288	37245	ZGLP1	2	1.83	moderate	No	Yes	Compara, eggNOG
310	FBgn0265045	Strn-Mlck	FastLMM	0	0	0	0	1	0	0	FBGN0265045	Strn-Mlck	36753	FBgn0265045	Strn-Mlck	Human	23363	29092	OBSL1	2	1.91	moderate	No	Yes	eggNOG, OMA
312	FBgn0261090	Sytbeta	FastLMM	0	0	1	0	0	0	0	FBGN0261090	Sytbeta	39630	FBgn0261090	Sytbeta	Human	148281	18638	SYT6	4	4.07	moderate	No	Yes	OrthoDB, OrthoFinder, Panther, TreeFam
312	FBgn0261090	Sytbeta	FastLMM	0	0	1	0	0	0	0	FBGN0261090	Sytbeta	39630	FBgn0261090	Sytbeta	Human	102724488	NA	LOC102724488	3	2.91	moderate	No	Yes	eggNOG, OrthoDB, OrthoFinder
312	FBgn0261090	Sytbeta	FastLMM	0	0	1	0	0	0	0	FBGN0261090	Sytbeta	39630	FBgn0261090	Sytbeta	Human	57586	14962	SYT13	3	2.84	moderate	No	Yes	Compara, eggNOG, OrthoDB
312	FBgn0261090	Sytbeta	FastLMM	0	0	1	0	0	0	0	FBGN0261090	Sytbeta	39630	FBgn0261090	Sytbeta	Human	83849	17167	SYT15	2	1.9	moderate	No	Yes	eggNOG, OrthoFinder
313	FBgn0041181	Tep3	FastLMM	0	0	0	0	1	0	0	FBGN0041181	Tep3	34045	FBgn0041181	Tep3	Human	135228	21685	CD109	11	10.8	moderate	Yes	No	Compara, eggNOG, Hieranoid, Homologene, Inparanoid, OrthoDB, OrthoFinder, OrthoInspector, orthoMCL, Panther, Phylome
313	FBgn0041181	Tep3	FastLMM	0	0	0	0	1	0	0	FBGN0041181	Tep3	34045	FBgn0041181	Tep3	Human	5858	9750	PZP	6	5.89	moderate	No	Yes	Compara, eggNOG, Isobase, OrthoDB, OrthoFinder, Panther
313	FBgn0041181	Tep3	FastLMM	0	0	0	0	1	0	0	FBGN0041181	Tep3	34045	FBgn0041181	Tep3	Human	2	7	A2M	6	5.89	moderate	No	Yes	Compara, eggNOG, Isobase, OrthoDB, OrthoFinder, Panther
313	FBgn0041181	Tep3	FastLMM	0	0	0	0	1	0	0	FBGN0041181	Tep3	34045	FBgn0041181	Tep3	Human	144568	23336	A2ML1	5	4.94	moderate	No	Yes	Compara, eggNOG, OrthoDB, OrthoFinder, Panther
313	FBgn0041181	Tep3	FastLMM	0	0	0	0	1	0	0	FBGN0041181	Tep3	34045	FBgn0041181	Tep3	Human	727	1331	C5	5	4.9	moderate	No	Yes	Compara, eggNOG, OrthoDB, Panther, TreeFam
313	FBgn0041181	Tep3	FastLMM	0	0	0	0	1	0	0	FBGN0041181	Tep3	34045	FBgn0041181	Tep3	Human	721	1324	C4B	4	3.97	moderate	No	Yes	eggNOG, OrthoDB, Panther, TreeFam
313	FBgn0041181	Tep3	FastLMM	0	0	0	0	1	0	0	FBGN0041181	Tep3	34045	FBgn0041181	Tep3	Human	718	1318	C3	4	3.89	moderate	No	Yes	Compara, eggNOG, Panther, TreeFam
313	FBgn0041181	Tep3	FastLMM	0	0	0	0	1	0	0	FBGN0041181	Tep3	34045	FBgn0041181	Tep3	Human	720	1323	C4A	4	3.89	moderate	No	Yes	Compara, eggNOG, Panther, TreeFam
313	FBgn0041181	Tep3	FastLMM	0	0	0	0	1	0	0	FBGN0041181	Tep3	34045	FBgn0041181	Tep3	Human	27151	23228	CPAMD8	3	3.01	moderate	No	Yes	eggNOG, OrthoDB, Panther
316	FBgn0026160	tna	FastLMM	0	1	0	1	0	1	1	FBGN0026160	tna	39217	FBgn0026160	tna	Human	57178	16493	ZMIZ1	12	11.79	moderate	No	Yes	Compara, eggNOG, Hieranoid, Inparanoid, OrthoDB, OrthoFinder, OrthoInspector, orthoMCL, Panther, Phylome, RoundUp, TreeFam
317	FBgn0004924	Top1	FastLMM	0	1	0	0	1	0	0	FBGN0004924	Top1	32458	FBgn0004924	Top1	Human	116447	29787	TOP1MT	10	9.81	moderate	No	Yes	eggNOG, Hieranoid, OrthoDB, OrthoFinder, OrthoInspector, orthoMCL, Panther, Phylome, RoundUp, TreeFam
324	FBgn0003944	Ubx	FastLMM	0	0	1	0	0	0	0	FBGN0003944	Ubx	42034	FBgn0003944	Ubx	Human	3216	5117	HOXB6	3	2.91	moderate	Yes	No	eggNOG, Panther, Phylome
326	FBgn0040068	vav	FastLMM	0	0	0	1	0	0	0	FBGN0040068	Vav	32920	FBgn0040068	Vav	Human	10451	12659	VAV3	12	11.79	moderate	No	Yes	Compara, eggNOG, Hieranoid, Inparanoid, OMA, OrthoFinder, OrthoInspector, orthoMCL, Panther, Phylome, RoundUp, TreeFam
326	FBgn0040068	vav	FastLMM	0	0	0	1	0	0	0	FBGN0040068	Vav	32920	FBgn0040068	Vav	Human	7410	12658	VAV2	12	11.79	moderate	No	Yes	Compara, eggNOG, Hieranoid, Inparanoid, OMA, OrthoFinder, OrthoInspector, orthoMCL, Panther, Phylome, RoundUp, TreeFam
330	FBgn0261862	whd	FastLMM	1	0	0	0	0	0	0	FBGN0261862	whd	36109	FBgn0261862	whd	Human	1375	2329	CPT1B	12	11.87	moderate	No	Yes	eggNOG, Hieranoid, Inparanoid, OMA, OrthoDB, OrthoFinder, OrthoInspector, orthoMCL, Panther, Phylome, RoundUp, TreeFam
330	FBgn0261862	whd	FastLMM	1	0	0	0	0	0	0	FBGN0261862	whd	36109	FBgn0261862	whd	Human	126129	18540	CPT1C	11	10.76	moderate	No	Yes	Compara, eggNOG, Hieranoid, Inparanoid, OrthoDB, OrthoFinder, OrthoInspector, orthoMCL, Panther, Phylome, TreeFam
332	FBgn0051860	CG31860	FastLMM	0	0	1	0	0	0	0	FBGN0051860	ZnT33D	326167	FBgn0051860	ZnT33D	Human	7780	11013	SLC30A2	10	9.88	moderate	Yes	No	eggNOG, Hieranoid, Inparanoid, Isobase, OrthoDB, OrthoFinder, OrthoInspector, Panther, Phylome, TreeFam
332	FBgn0051860	CG31860	FastLMM	0	0	1	0	0	0	0	FBGN0051860	ZnT33D	326167	FBgn0051860	ZnT33D	Human	7781	11014	SLC30A3	9	8.93	moderate	No	Yes	eggNOG, Hieranoid, Homologene, Inparanoid, OrthoDB, OrthoInspector, Panther, Phylome, TreeFam
332	FBgn0051860	CG31860	FastLMM	0	0	1	0	0	0	0	FBGN0051860	ZnT33D	326167	FBgn0051860	ZnT33D	Human	169026	20303	SLC30A8	8	7.93	moderate	No	Yes	eggNOG, Hieranoid, Inparanoid, OrthoDB, OrthoInspector, Panther, Phylome, TreeFam
333	FBgn0039747	AdoR	FastEpistasis	0	0	0	0	1	0	0	FBGN0039747	AdoR	43583	FBgn0039747	AdoR	Human	134	262	ADORA1	7	6.85	moderate	No	Yes	Compara, Isobase, OrthoFinder, OrthoInspector, Panther, Phylome, TreeFam
333	FBgn0039747	AdoR	FastEpistasis	0	0	0	0	1	0	0	FBGN0039747	AdoR	43583	FBgn0039747	AdoR	Human	135	263	ADORA2A	6	5.83	moderate	No	Yes	Compara, eggNOG, OrthoFinder, OrthoInspector, orthoMCL, Panther
333	FBgn0039747	AdoR	FastEpistasis	0	0	0	0	1	0	0	FBGN0039747	AdoR	43583	FBgn0039747	AdoR	Human	140	268	ADORA3	5	4.94	moderate	No	Yes	Compara, OrthoFinder, OrthoInspector, Panther, Phylome
335	FBgn0250816	AGO3	FastEpistasis	0	0	0	0	0	0	1	FBGN0250816	AGO3	3355150	FBgn0250816	AGO3	Human	9271	9007	PIWIL1	9	8.99	moderate	No	Yes	eggNOG, Hieranoid, Inparanoid, OMA, OrthoFinder, OrthoInspector, orthoMCL, Panther, RoundUp
335	FBgn0250816	AGO3	FastEpistasis	0	0	0	0	0	0	1	FBGN0250816	AGO3	3355150	FBgn0250816	AGO3	Human	440822	18443	PIWIL3	6	5.95	moderate	No	No	eggNOG, Hieranoid, Inparanoid, OrthoFinder, orthoMCL, Panther
335	FBgn0250816	AGO3	FastEpistasis	0	0	0	0	0	0	1	FBGN0250816	AGO3	3355150	FBgn0250816	AGO3	Human	143689	18444	PIWIL4	5	4.95	moderate	No	No	eggNOG, Inparanoid, OrthoInspector, orthoMCL, Panther
336	FBgn0004372	aly	FastEpistasis	0	0	0	0	0	0	1	FBGN0004372	aly	45960	FBgn0004372	aly	Human	286826	30830	LIN9	7	6.86	moderate	Yes	No	Compara, eggNOG, Inparanoid, OMA, Panther, Phylome, TreeFam
340	FBgn0262870	axo	FastEpistasis	0	0	0	0	0	0	1	FBGN0262870	axo	43923	FBgn0262870	axo	Human	26047	13830	CNTNAP2	5	4.82	moderate	Yes	No	eggNOG, Isobase, OrthoDB, OrthoFinder, TreeFam
340	FBgn0262870	axo	FastEpistasis	0	0	0	0	0	0	1	FBGN0262870	axo	43923	FBgn0262870	axo	Human	85445	18747	CNTNAP4	4	3.87	moderate	No	No	eggNOG, OrthoDB, OrthoFinder, TreeFam
340	FBgn0262870	axo	FastEpistasis	0	0	0	0	0	0	1	FBGN0262870	axo	43923	FBgn0262870	axo	Human	79937	13834	CNTNAP3	4	3.87	moderate	No	No	eggNOG, OrthoDB, OrthoFinder, TreeFam
340	FBgn0262870	axo	FastEpistasis	0	0	0	0	0	0	1	FBGN0262870	axo	43923	FBgn0262870	axo	Human	129684	18748	CNTNAP5	4	3.87	moderate	No	No	eggNOG, OrthoDB, OrthoFinder, TreeFam
340	FBgn0262870	axo	FastEpistasis	0	0	0	0	0	0	1	FBGN0262870	axo	43923	FBgn0262870	axo	Human	8506	8011	CNTNAP1	4	3.87	moderate	No	No	eggNOG, OrthoDB, OrthoFinder, TreeFam
340	FBgn0262870	axo	FastEpistasis	0	0	0	0	0	0	1	FBGN0262870	axo	43923	FBgn0262870	axo	Human	728577	32035	CNTNAP3B	4	3.87	moderate	No	No	eggNOG, OrthoDB, OrthoFinder, TreeFam
342	FBgn0011300	babo	FastEpistasis	0	0	0	0	0	1	0	FBGN0011300	babo	35900	FBgn0011300	babo	Human	130399	18123	ACVR1C	12	11.79	moderate	No	Yes	Compara, eggNOG, Hieranoid, Inparanoid, OrthoDB, OrthoFinder, OrthoInspector, orthoMCL, Panther, Phylome, RoundUp, TreeFam
342	FBgn0011300	babo	FastEpistasis	0	0	0	0	0	1	0	FBGN0011300	babo	35900	FBgn0011300	babo	Human	91	172	ACVR1B	10	9.75	moderate	No	Yes	Compara, eggNOG, Hieranoid, Inparanoid, OrthoFinder, OrthoInspector, orthoMCL, Panther, Phylome, TreeFam
342	FBgn0011300	babo	FastEpistasis	0	0	0	0	0	1	0	FBGN0011300	babo	35900	FBgn0011300	babo	Human	90	171	ACVR1	4	3.84	moderate	No	No	Compara, eggNOG, OrthoDB, OrthoFinder
342	FBgn0011300	babo	FastEpistasis	0	0	0	0	0	1	0	FBGN0011300	babo	35900	FBgn0011300	babo	Human	94	175	ACVRL1	4	3.84	moderate	No	No	Compara, eggNOG, OrthoDB, OrthoFinder
344	FBgn0014135	bnl	FastEpistasis	0	1	1	0	0	0	0	FBGN0014135	bnl	42356	FBgn0014135	bnl	Human	8823	3672	FGF16	6	5.83	moderate	No	Yes	Compara, eggNOG, OrthoFinder, OrthoInspector, orthoMCL, Panther
344	FBgn0014135	bnl	FastEpistasis	0	1	1	0	0	0	0	FBGN0014135	bnl	42356	FBgn0014135	bnl	Human	2254	3687	FGF9	5	4.93	moderate	No	Yes	Compara, eggNOG, OrthoFinder, OrthoInspector, Panther
344	FBgn0014135	bnl	FastEpistasis	0	1	1	0	0	0	0	FBGN0014135	bnl	42356	FBgn0014135	bnl	Human	2255	3666	FGF10	5	4.93	moderate	No	Yes	Compara, eggNOG, OrthoFinder, OrthoInspector, Panther
344	FBgn0014135	bnl	FastEpistasis	0	1	1	0	0	0	0	FBGN0014135	bnl	42356	FBgn0014135	bnl	Human	27006	3679	FGF22	5	4.93	moderate	No	Yes	Compara, eggNOG, OrthoFinder, OrthoInspector, Panther
344	FBgn0014135	bnl	FastEpistasis	0	1	1	0	0	0	0	FBGN0014135	bnl	42356	FBgn0014135	bnl	Human	2258	3670	FGF13	5	4.89	moderate	No	Yes	Compara, eggNOG, OrthoInspector, Panther, TreeFam
344	FBgn0014135	bnl	FastEpistasis	0	1	1	0	0	0	0	FBGN0014135	bnl	42356	FBgn0014135	bnl	Human	2249	3682	FGF4	5	4.89	moderate	No	Yes	Compara, eggNOG, OrthoInspector, Panther, TreeFam
344	FBgn0014135	bnl	FastEpistasis	0	1	1	0	0	0	0	FBGN0014135	bnl	42356	FBgn0014135	bnl	Human	2251	3684	FGF6	5	4.89	moderate	No	Yes	Compara, eggNOG, OrthoInspector, Panther, TreeFam
344	FBgn0014135	bnl	FastEpistasis	0	1	1	0	0	0	0	FBGN0014135	bnl	42356	FBgn0014135	bnl	Human	2250	3683	FGF5	5	4.89	moderate	No	Yes	Compara, eggNOG, OrthoInspector, Panther, TreeFam
344	FBgn0014135	bnl	FastEpistasis	0	1	1	0	0	0	0	FBGN0014135	bnl	42356	FBgn0014135	bnl	Human	2256	3667	FGF11	5	4.89	moderate	No	Yes	Compara, eggNOG, OrthoInspector, Panther, TreeFam
344	FBgn0014135	bnl	FastEpistasis	0	1	1	0	0	0	0	FBGN0014135	bnl	42356	FBgn0014135	bnl	Human	2259	3671	FGF14	4	3.96	moderate	No	Yes	eggNOG, OrthoInspector, Panther, TreeFam
344	FBgn0014135	bnl	FastEpistasis	0	1	1	0	0	0	0	FBGN0014135	bnl	42356	FBgn0014135	bnl	Human	2257	3668	FGF12	4	3.93	moderate	No	Yes	Compara, eggNOG, OrthoInspector, Panther
344	FBgn0014135	bnl	FastEpistasis	0	1	1	0	0	0	0	FBGN0014135	bnl	42356	FBgn0014135	bnl	Human	2248	3681	FGF3	4	3.93	moderate	No	Yes	Compara, eggNOG, OrthoInspector, Panther
344	FBgn0014135	bnl	FastEpistasis	0	1	1	0	0	0	0	FBGN0014135	bnl	42356	FBgn0014135	bnl	Human	2246	3665	FGF1	4	3.93	moderate	No	Yes	Compara, eggNOG, OrthoInspector, Panther
344	FBgn0014135	bnl	FastEpistasis	0	1	1	0	0	0	0	FBGN0014135	bnl	42356	FBgn0014135	bnl	Human	2252	3685	FGF7	4	3.93	moderate	No	Yes	Compara, eggNOG, OrthoInspector, Panther
344	FBgn0014135	bnl	FastEpistasis	0	1	1	0	0	0	0	FBGN0014135	bnl	42356	FBgn0014135	bnl	Human	2247	3676	FGF2	3	2.93	moderate	No	Yes	Compara, eggNOG, Panther
344	FBgn0014135	bnl	FastEpistasis	0	1	1	0	0	0	0	FBGN0014135	bnl	42356	FBgn0014135	bnl	Human	8822	3673	FGF17	3	2.93	moderate	No	Yes	Compara, eggNOG, Panther
344	FBgn0014135	bnl	FastEpistasis	0	1	1	0	0	0	0	FBGN0014135	bnl	42356	FBgn0014135	bnl	Human	26291	3678	FGF21	3	2.93	moderate	No	Yes	Compara, eggNOG, Panther
344	FBgn0014135	bnl	FastEpistasis	0	1	1	0	0	0	0	FBGN0014135	bnl	42356	FBgn0014135	bnl	Human	9965	3675	FGF19	3	2.93	moderate	No	Yes	Compara, eggNOG, Panther
344	FBgn0014135	bnl	FastEpistasis	0	1	1	0	0	0	0	FBGN0014135	bnl	42356	FBgn0014135	bnl	Human	8817	3674	FGF18	3	2.93	moderate	No	Yes	Compara, eggNOG, Panther
344	FBgn0014135	bnl	FastEpistasis	0	1	1	0	0	0	0	FBGN0014135	bnl	42356	FBgn0014135	bnl	Human	2253	3686	FGF8	3	2.93	moderate	No	Yes	Compara, eggNOG, Panther
344	FBgn0014135	bnl	FastEpistasis	0	1	1	0	0	0	0	FBGN0014135	bnl	42356	FBgn0014135	bnl	Human	8074	3680	FGF23	3	2.93	moderate	No	Yes	Compara, eggNOG, Panther
345	FBgn0265598	CG15048	FastEpistasis	0	0	0	1	0	0	0	FBGN0265598	Bx	32846	FBgn0265598	Bx	Human	55885	6643	LMO3	7	6.95	moderate	No	Yes	Isobase, OrthoFinder, OrthoInspector, Panther, Phylome, RoundUp, TreeFam
345	FBgn0265598	CG15048	FastEpistasis	0	0	0	1	0	0	0	FBGN0265598	Bx	32846	FBgn0265598	Bx	Human	4005	6642	LMO2	2	2.06	moderate	No	Yes	Panther, TreeFam
347	FBgn0034554	CG15227	FastEpistasis	0	1	0	0	0	0	0	FBGN0034554	CG15227	37359	FBgn0034554	CAH14	Human	763	1377	CA5A	3	2.84	moderate	Yes	No	Compara, eggNOG, OrthoDB
347	FBgn0034554	CG15227	FastEpistasis	0	1	0	0	0	0	0	FBGN0034554	CG15227	37359	FBgn0034554	CAH14	Human	770	1370	CA11	3	2.84	moderate	Yes	No	Compara, eggNOG, OrthoDB
347	FBgn0034554	CG15227	FastEpistasis	0	1	0	0	0	0	0	FBGN0034554	CG15227	37359	FBgn0034554	CAH14	Human	762	1375	CA4	3	2.84	moderate	Yes	No	Compara, eggNOG, OrthoDB
347	FBgn0034554	CG15227	FastEpistasis	0	1	0	0	0	0	0	FBGN0034554	CG15227	37359	FBgn0034554	CAH14	Human	771	1371	CA12	3	2.84	moderate	Yes	No	Compara, eggNOG, OrthoDB
347	FBgn0034554	CG15227	FastEpistasis	0	1	0	0	0	0	0	FBGN0034554	CG15227	37359	FBgn0034554	CAH14	Human	759	1368	CA1	3	2.84	moderate	Yes	No	Compara, eggNOG, OrthoDB
347	FBgn0034554	CG15227	FastEpistasis	0	1	0	0	0	0	0	FBGN0034554	CG15227	37359	FBgn0034554	CAH14	Human	23632	1372	CA14	3	2.84	moderate	Yes	No	Compara, eggNOG, OrthoDB
347	FBgn0034554	CG15227	FastEpistasis	0	1	0	0	0	0	0	FBGN0034554	CG15227	37359	FBgn0034554	CAH14	Human	11238	1378	CA5B	3	2.84	moderate	Yes	No	Compara, eggNOG, OrthoDB
347	FBgn0034554	CG15227	FastEpistasis	0	1	0	0	0	0	0	FBGN0034554	CG15227	37359	FBgn0034554	CAH14	Human	377677	14914	CA13	3	2.84	moderate	Yes	No	Compara, eggNOG, OrthoDB
347	FBgn0034554	CG15227	FastEpistasis	0	1	0	0	0	0	0	FBGN0034554	CG15227	37359	FBgn0034554	CAH14	Human	761	1374	CA3	3	2.84	moderate	Yes	No	Compara, eggNOG, OrthoDB
347	FBgn0034554	CG15227	FastEpistasis	0	1	0	0	0	0	0	FBGN0034554	CG15227	37359	FBgn0034554	CAH14	Human	765	1380	CA6	3	2.84	moderate	Yes	No	Compara, eggNOG, OrthoDB
347	FBgn0034554	CG15227	FastEpistasis	0	1	0	0	0	0	0	FBGN0034554	CG15227	37359	FBgn0034554	CAH14	Human	56934	1369	CA10	3	2.84	moderate	Yes	No	Compara, eggNOG, OrthoDB
347	FBgn0034554	CG15227	FastEpistasis	0	1	0	0	0	0	0	FBGN0034554	CG15227	37359	FBgn0034554	CAH14	Human	768	1383	CA9	3	2.84	moderate	Yes	No	Compara, eggNOG, OrthoDB
348	FBgn0013995	Calx	FastEpistasis	0	1	0	0	0	0	0	FBGN0013995	Calx	42481	FBgn0013995	Calx	Human	6543	11069	SLC8A2	12	11.87	moderate	No	Yes	eggNOG, Hieranoid, Inparanoid, OMA, OrthoDB, OrthoFinder, OrthoInspector, orthoMCL, Panther, Phylome, RoundUp, TreeFam
350	FBgn0028509	cenG1A	FastEpistasis	0	0	1	0	0	0	0	FBGN0028509	CenG1A	34803	FBgn0028509	CenG1A	Human	116988	16923	AGAP3	11	10.86	moderate	No	Yes	eggNOG, Hieranoid, Inparanoid, OMA, OrthoFinder, OrthoInspector, orthoMCL, Panther, Phylome, RoundUp, TreeFam
350	FBgn0028509	cenG1A	FastEpistasis	0	0	1	0	0	0	0	FBGN0028509	CenG1A	34803	FBgn0028509	CenG1A	Human	116986	16921	AGAP2	9	8.82	moderate	No	Yes	eggNOG, Hieranoid, Inparanoid, OrthoFinder, OrthoInspector, orthoMCL, Panther, Phylome, TreeFam
350	FBgn0028509	cenG1A	FastEpistasis	0	0	1	0	0	0	0	FBGN0028509	CenG1A	34803	FBgn0028509	CenG1A	Human	119016	23459	AGAP4	7	6.72	moderate	No	Yes	eggNOG, Isobase, OrthoFinder, orthoMCL, Panther, Phylome, TreeFam
350	FBgn0028509	cenG1A	FastEpistasis	0	0	1	0	0	0	0	FBGN0028509	CenG1A	34803	FBgn0028509	CenG1A	Human	729092	23467	AGAP5	6	5.77	moderate	No	Yes	eggNOG, OrthoFinder, orthoMCL, Panther, Phylome, TreeFam
350	FBgn0028509	cenG1A	FastEpistasis	0	0	1	0	0	0	0	FBGN0028509	CenG1A	34803	FBgn0028509	CenG1A	Human	414189	23466	AGAP6	6	5.77	moderate	No	Yes	eggNOG, OrthoFinder, orthoMCL, Panther, Phylome, TreeFam
350	FBgn0028509	cenG1A	FastEpistasis	0	0	1	0	0	0	0	FBGN0028509	CenG1A	34803	FBgn0028509	CenG1A	Human	119385	29421	AGAP11	4	4.06	moderate	No	Yes	Inparanoid, OrthoFinder, Panther, Phylome
350	FBgn0028509	cenG1A	FastEpistasis	0	0	1	0	0	0	0	FBGN0028509	CenG1A	34803	FBgn0028509	CenG1A	Human	642517	23463	AGAP9	4	3.97	moderate	No	Yes	OrthoFinder, Panther, Phylome, TreeFam
350	FBgn0028509	cenG1A	FastEpistasis	0	0	1	0	0	0	0	FBGN0028509	CenG1A	34803	FBgn0028509	CenG1A	Human	653268	23465	AGAP7P	4	3.87	moderate	No	Yes	orthoMCL, Panther, Phylome, TreeFam
350	FBgn0028509	cenG1A	FastEpistasis	0	0	1	0	0	0	0	FBGN0028509	CenG1A	34803	FBgn0028509	CenG1A	Human	653234	23659	AGAP10P	3	2.71	moderate	No	Yes	eggNOG, orthoMCL, Phylome
351	FBgn0031568	CG10019	FastEpistasis	0	1	0	0	0	0	0	FBGN0031568	CG10019	33600	FBgn0031568	CG10019	Human	151473	26417	SLC16A14	4	3.87	moderate	Yes	No	eggNOG, OrthoDB, OrthoFinder, TreeFam
352	FBgn0037517	CG10086	FastEpistasis	0	1	0	0	0	0	0	FBGN0037517	CG10086	40920	FBgn0037517	CG10086	Human	91947	28087	ARRDC4	6	5.94	moderate	Yes	No	Compara, eggNOG, OrthoDB, OrthoFinder, OrthoInspector, Panther
352	FBgn0037517	CG10086	FastEpistasis	0	1	0	0	0	0	0	FBGN0037517	CG10086	40920	FBgn0037517	CG10086	Human	10628	16952	TXNIP	6	5.94	moderate	Yes	No	Compara, eggNOG, OrthoDB, OrthoFinder, OrthoInspector, Panther
352	FBgn0037517	CG10086	FastEpistasis	0	1	0	0	0	0	0	FBGN0037517	CG10086	40920	FBgn0037517	CG10086	Human	27106	25225	ARRDC2	5	5.01	moderate	No	No	eggNOG, OrthoDB, OrthoFinder, OrthoInspector, Panther
352	FBgn0037517	CG10086	FastEpistasis	0	1	0	0	0	0	0	FBGN0037517	CG10086	40920	FBgn0037517	CG10086	Human	57561	29263	ARRDC3	5	5.01	moderate	No	No	eggNOG, OrthoDB, OrthoFinder, OrthoInspector, Panther
352	FBgn0037517	CG10086	FastEpistasis	0	1	0	0	0	0	0	FBGN0037517	CG10086	40920	FBgn0037517	CG10086	Human	92714	28633	ARRDC1	4	3.94	moderate	No	No	Compara, eggNOG, OrthoDB, Panther
352	FBgn0037517	CG10086	FastEpistasis	0	1	0	0	0	0	0	FBGN0037517	CG10086	40920	FBgn0037517	CG10086	Human	645432	31407	ARRDC5	4	3.94	moderate	No	Yes	Compara, eggNOG, OrthoDB, Panther
353	FBgn0034420	CG10737	FastEpistasis	0	1	0	0	0	0	0	FBGN0034420	CG10737	37202	FBgn0034420	CG10737	Human	9854	29000	C2CD2L	3	2.93	moderate	No	Yes	Compara, eggNOG, Panther
356	FBgn0031835	CG11319	FastEpistasis	1	0	0	0	0	0	0	FBGN0031835	CG11319	33923	FBgn0031835	CG11319	Human	1804	3010	DPP6	8	7.94	moderate	No	No	eggNOG, Hieranoid, Inparanoid, OMA, OrthoDB, Panther, Phylome, TreeFam
356	FBgn0031835	CG11319	FastEpistasis	1	0	0	0	0	0	0	FBGN0031835	CG11319	33923	FBgn0031835	CG11319	Human	2191	3590	FAP	4	3.92	moderate	No	No	eggNOG, OrthoDB, Panther, Phylome
362	FBgn0034513	CG13423	FastEpistasis	0	0	1	0	0	0	0	FBGN0034513	CG13423	37315	FBgn0034513	CG13423	Human	642	1059	BLMH	5	4.84	moderate	Yes	No	Compara, eggNOG, Isobase, Panther, TreeFam
365	FBgn0250847	CG14034	FastEpistasis	0	0	0	0	0	0	1	FBGN0250847	CG14034	33751	FBgn0250847	CG14034	Human	5406	9155	PNLIP	3	3.03	moderate	Yes	No	Compara, OrthoFinder, Panther
365	FBgn0250847	CG14034	FastEpistasis	0	0	0	0	0	0	1	FBGN0250847	CG14034	33751	FBgn0250847	CG14034	Human	5407	9156	PNLIPRP1	3	3.03	moderate	Yes	No	Compara, OrthoFinder, Panther
365	FBgn0250847	CG14034	FastEpistasis	0	0	0	0	0	0	1	FBGN0250847	CG14034	33751	FBgn0250847	CG14034	Human	119548	23492	PNLIPRP3	3	3.03	moderate	Yes	No	Compara, OrthoFinder, Panther
365	FBgn0250847	CG14034	FastEpistasis	0	0	0	0	0	0	1	FBGN0250847	CG14034	33751	FBgn0250847	CG14034	Human	149998	18821	LIPI	3	2.98	moderate	Yes	No	Compara, Isobase, Panther
372	FBgn0032654	CG15147	FastEpistasis	0	0	1	0	0	0	0	FBGN0032654	CG15147	35069	FBgn0032654	CG15147	Human	280636	18251	SELENOH	4	3.9	moderate	Yes	No	Compara, Panther, Phylome, TreeFam
376	FBgn0036345	CG17300	FastEpistasis	0	0	0	0	1	0	0	FBGN0036345	CG17300	39489	FBgn0036345	CG17300	Human	515	840	ATP5PB	4	3.91	moderate	Yes	No	eggNOG, OrthoFinder, Panther, Phylome
377	FBgn0032775	CG17544	FastEpistasis	0	0	0	0	1	0	0	FBGN0032775	CG17544	35213	FBgn0032775	CG17544	Human	8310	121	ACOX3	10	9.76	moderate	Yes	No	eggNOG, Hieranoid, Isobase, OrthoDB, OrthoFinder, orthoMCL, Panther, Phylome, RoundUp, TreeFam
379	FBgn0033226	CG1882	FastEpistasis	1	0	0	0	0	0	0	FBGN0033226	CG1882	35733	FBgn0033226	CG1882	Human	51099	21396	ABHD5	12	11.79	moderate	No	Yes	Compara, eggNOG, Hieranoid, Inparanoid, OrthoDB, OrthoFinder, OrthoInspector, orthoMCL, Panther, Phylome, RoundUp, TreeFam
379	FBgn0033226	CG1882	FastEpistasis	1	0	0	0	0	0	0	FBGN0033226	CG1882	35733	FBgn0033226	CG1882	Human	79852	23760	EPHX3	2	1.81	moderate	No	Yes	eggNOG, Phylome
387	FBgn0052369	CG32369	FastEpistasis	0	1	0	0	0	0	0	FBGN0052369	CG32369	38873	FBgn0052369	CG32369	Human	91694	26302	LONRF1	11	10.76	moderate	No	Yes	Compara, eggNOG, Hieranoid, Inparanoid, OrthoDB, OrthoFinder, OrthoInspector, orthoMCL, Panther, Phylome, TreeFam
387	FBgn0052369	CG32369	FastEpistasis	0	1	0	0	0	0	0	FBGN0052369	CG32369	38873	FBgn0052369	CG32369	Human	165918	26661	RNF168	2	1.91	moderate	No	Yes	eggNOG, OrthoDB
388	FBgn0052373	CG32373	FastEpistasis	0	0	0	1	0	0	0	FBGN0052373	CG32373	318000	FBgn0052373	CG32373	Human	4054	6716	LTBP3	2	1.97	moderate	Yes	No	OrthoDB, TreeFam
388	FBgn0052373	CG32373	FastEpistasis	0	0	0	1	0	0	0	FBGN0052373	CG32373	318000	FBgn0052373	CG32373	Human	10516	3602	FBLN5	2	1.97	moderate	Yes	No	OrthoDB, TreeFam
388	FBgn0052373	CG32373	FastEpistasis	0	0	0	1	0	0	0	FBGN0052373	CG32373	318000	FBgn0052373	CG32373	Human	84467	18794	FBN3	2	1.91	moderate	Yes	No	eggNOG, OrthoDB
388	FBgn0052373	CG32373	FastEpistasis	0	0	0	1	0	0	0	FBGN0052373	CG32373	318000	FBgn0052373	CG32373	Human	8785	6910	MATN4	2	1.91	moderate	Yes	No	eggNOG, OrthoDB
388	FBgn0052373	CG32373	FastEpistasis	0	0	0	1	0	0	0	FBGN0052373	CG32373	318000	FBgn0052373	CG32373	Human	2201	3604	FBN2	2	1.91	moderate	Yes	No	eggNOG, OrthoDB
388	FBgn0052373	CG32373	FastEpistasis	0	0	0	1	0	0	0	FBGN0052373	CG32373	318000	FBgn0052373	CG32373	Human	2200	3603	FBN1	2	1.91	moderate	Yes	No	eggNOG, OrthoDB
388	FBgn0052373	CG32373	FastEpistasis	0	0	0	1	0	0	0	FBGN0052373	CG32373	318000	FBgn0052373	CG32373	Human	4147	6908	MATN2	2	1.91	moderate	Yes	No	eggNOG, OrthoDB
389	FBgn0052683	CG32683	FastEpistasis	0	0	0	0	0	1	0	FBGN0052683	CG32683	31970	FBgn0052683	CG32683	Human	409	712	ARRB2	5	4.87	moderate	Yes	No	eggNOG, Isobase, OrthoDB, Panther, Phylome
389	FBgn0052683	CG32683	FastEpistasis	0	0	0	0	0	1	0	FBGN0052683	CG32683	31970	FBgn0052683	CG32683	Human	408	711	ARRB1	4	3.92	moderate	No	No	eggNOG, OrthoDB, Panther, Phylome
389	FBgn0052683	CG32683	FastEpistasis	0	0	0	0	0	1	0	FBGN0052683	CG32683	31970	FBgn0052683	CG32683	Human	407	710	ARR3	4	3.92	moderate	No	No	eggNOG, OrthoDB, Panther, Phylome
393	FBgn0053970	CG33970	FastEpistasis	0	0	0	0	0	0	1	FBGN0053970	CG33970	43186	FBgn0053970	CG33970	Human	21	33	ABCA3	2	1.9	moderate	Yes	No	eggNOG, OrthoFinder
393	FBgn0053970	CG33970	FastEpistasis	0	0	0	0	0	0	1	FBGN0053970	CG33970	43186	FBgn0053970	CG33970	Human	26154	14637	ABCA12	2	1.9	moderate	Yes	No	eggNOG, OrthoFinder
393	FBgn0053970	CG33970	FastEpistasis	0	0	0	0	0	0	1	FBGN0053970	CG33970	43186	FBgn0053970	CG33970	Human	20	32	ABCA2	2	1.9	moderate	Yes	No	eggNOG, OrthoFinder
393	FBgn0053970	CG33970	FastEpistasis	0	0	0	0	0	0	1	FBGN0053970	CG33970	43186	FBgn0053970	CG33970	Human	9429	74	ABCG2	2	1.81	moderate	Yes	No	eggNOG, Phylome
395	FBgn0085422	CG34393	FastEpistasis	0	0	0	0	0	1	0	FBGN0085422	CG34393	33534	FBgn0085422	CG34393	Human	153020	24881	RASGEF1B	6	5.83	moderate	Yes	No	eggNOG, Isobase, OrthoDB, Panther, Phylome, TreeFam
395	FBgn0085422	CG34393	FastEpistasis	0	0	0	0	0	1	0	FBGN0085422	CG34393	33534	FBgn0085422	CG34393	Human	221002	24246	RASGEF1A	5	4.88	moderate	No	No	eggNOG, OrthoDB, Panther, Phylome, TreeFam
395	FBgn0085422	CG34393	FastEpistasis	0	0	0	0	0	1	0	FBGN0085422	CG34393	33534	FBgn0085422	CG34393	Human	255426	27400	RASGEF1C	5	4.88	moderate	No	No	eggNOG, OrthoDB, Panther, Phylome, TreeFam
397	FBgn0036838	CG3808	FastEpistasis	1	0	0	0	0	0	0	FBGN0036838	CG3808	40074	FBgn0036838	CG3808	Human	79979	25748	TRMT2B	6	5.77	moderate	No	Yes	Compara, eggNOG, OrthoDB, OrthoFinder, orthoMCL, RoundUp
398	FBgn0259935	CG42458	FastEpistasis	0	1	0	0	0	0	0	FBGN0259935	CG42458	2768945	FBgn0259935	CG42458	Human	343069	29295	HNRNPCL1	5	5.07	moderate	No	Yes	OrthoDB, OrthoFinder, OrthoInspector, Panther, TreeFam
398	FBgn0259935	CG42458	FastEpistasis	0	1	0	0	0	0	0	FBGN0259935	CG42458	2768945	FBgn0259935	CG42458	Human	22913	15921	RALY	5	4.96	moderate	No	Yes	eggNOG, OrthoFinder, OrthoInspector, Panther, TreeFam
398	FBgn0259935	CG42458	FastEpistasis	0	1	0	0	0	0	0	FBGN0259935	CG42458	2768945	FBgn0259935	CG42458	Human	138046	27036	RALYL	5	4.96	moderate	No	Yes	eggNOG, OrthoFinder, OrthoInspector, Panther, TreeFam
398	FBgn0259935	CG42458	FastEpistasis	0	1	0	0	0	0	0	FBGN0259935	CG42458	2768945	FBgn0259935	CG42458	Human	649330	51235	HNRNPCL3	4	4	moderate	No	Yes	eggNOG, OrthoFinder, OrthoInspector, Panther
398	FBgn0259935	CG42458	FastEpistasis	0	1	0	0	0	0	0	FBGN0259935	CG42458	2768945	FBgn0259935	CG42458	Human	440563	48813	HNRNPCL2	4	4	moderate	No	Yes	eggNOG, OrthoFinder, OrthoInspector, Panther
398	FBgn0259935	CG42458	FastEpistasis	0	1	0	0	0	0	0	FBGN0259935	CG42458	2768945	FBgn0259935	CG42458	Human	101060301	51333	HNRNPCL4	4	4	moderate	No	Yes	eggNOG, OrthoFinder, OrthoInspector, Panther
399	FBgn0261545	CG42663	FastEpistasis	0	0	0	1	1	0	1	FBGN0261545	CG42663	36403	FBgn0261545	CG42663	Human	57701	29321	NCKAP5L	3	2.93	moderate	No	Yes	Compara, OrthoFinder, OrthoInspector
400	FBgn0261555	CG42673	FastEpistasis	0	0	0	1	0	0	0	FBGN0261555	CG42673	39111	FBgn0261555	CG42673	Human	400793	34351	C1orf226	3	2.84	moderate	No	Yes	Compara, eggNOG, OMA
402	FBgn0262360	CG43058	FastEpistasis	0	0	0	0	0	0	1	FBGN0262360	CG43058	12798445	FBgn0262360	CG43058	Human	6047	10067	RNF4	4	4.01	moderate	Yes	No	eggNOG, OrthoDB, OrthoFinder, Panther
405	FBgn0028481	CG4341	FastEpistasis	0	0	0	0	1	0	0	FBGN0028481	CG4341	33276	FBgn0028481	CG4341	Human	83857	24099	TMTC1	2	1.91	moderate	No	Yes	eggNOG, OrthoDB
409	FBgn0038750	CG4465	FastEpistasis	1	0	0	0	0	0	0	FBGN0038750	CG4465	42374	FBgn0038750	CG4465	Human	9389	8495	SLC22A14	5	4.94	moderate	Yes	No	Compara, eggNOG, OrthoDB, OrthoFinder, Panther
409	FBgn0038750	CG4465	FastEpistasis	1	0	0	0	0	0	0	FBGN0038750	CG4465	42374	FBgn0038750	CG4465	Human	9390	8494	SLC22A13	5	4.94	moderate	Yes	No	Compara, eggNOG, OrthoDB, OrthoFinder, Panther
409	FBgn0038750	CG4465	FastEpistasis	1	0	0	0	0	0	0	FBGN0038750	CG4465	42374	FBgn0038750	CG4465	Human	6582	10966	SLC22A2	4	3.93	moderate	No	No	Compara, eggNOG, OrthoFinder, Panther
409	FBgn0038750	CG4465	FastEpistasis	1	0	0	0	0	0	0	FBGN0038750	CG4465	42374	FBgn0038750	CG4465	Human	6581	10967	SLC22A3	4	3.93	moderate	No	No	Compara, eggNOG, OrthoFinder, Panther
409	FBgn0038750	CG4465	FastEpistasis	1	0	0	0	0	0	0	FBGN0038750	CG4465	42374	FBgn0038750	CG4465	Human	283238	28542	SLC22A24	4	3.93	moderate	No	No	Compara, eggNOG, OrthoFinder, Panther
409	FBgn0038750	CG4465	FastEpistasis	1	0	0	0	0	0	0	FBGN0038750	CG4465	42374	FBgn0038750	CG4465	Human	10864	10971	SLC22A7	4	3.93	moderate	No	No	Compara, eggNOG, OrthoFinder, Panther
409	FBgn0038750	CG4465	FastEpistasis	1	0	0	0	0	0	0	FBGN0038750	CG4465	42374	FBgn0038750	CG4465	Human	85413	20302	SLC22A16	4	3.93	moderate	No	No	Compara, eggNOG, OrthoFinder, Panther
409	FBgn0038750	CG4465	FastEpistasis	1	0	0	0	0	0	0	FBGN0038750	CG4465	42374	FBgn0038750	CG4465	Human	387775	18057	SLC22A10	4	3.93	moderate	No	Yes	Compara, eggNOG, OrthoFinder, Panther
409	FBgn0038750	CG4465	FastEpistasis	1	0	0	0	0	0	0	FBGN0038750	CG4465	42374	FBgn0038750	CG4465	Human	116085	17989	SLC22A12	4	3.93	moderate	No	No	Compara, eggNOG, OrthoFinder, Panther
409	FBgn0038750	CG4465	FastEpistasis	1	0	0	0	0	0	0	FBGN0038750	CG4465	42374	FBgn0038750	CG4465	Human	387601	32935	SLC22A25	4	3.93	moderate	No	No	Compara, eggNOG, OrthoFinder, Panther
409	FBgn0038750	CG4465	FastEpistasis	1	0	0	0	0	0	0	FBGN0038750	CG4465	42374	FBgn0038750	CG4465	Human	55867	18120	SLC22A11	4	3.93	moderate	No	No	Compara, eggNOG, OrthoFinder, Panther
409	FBgn0038750	CG4465	FastEpistasis	1	0	0	0	0	0	0	FBGN0038750	CG4465	42374	FBgn0038750	CG4465	Human	114571	16261	SLC22A9	4	3.93	moderate	No	Yes	Compara, eggNOG, OrthoFinder, Panther
409	FBgn0038750	CG4465	FastEpistasis	1	0	0	0	0	0	0	FBGN0038750	CG4465	42374	FBgn0038750	CG4465	Human	9376	10972	SLC22A8	4	3.93	moderate	No	No	Compara, eggNOG, OrthoFinder, Panther
409	FBgn0038750	CG4465	FastEpistasis	1	0	0	0	0	0	0	FBGN0038750	CG4465	42374	FBgn0038750	CG4465	Human	6583	10968	SLC22A4	4	3.93	moderate	No	No	Compara, eggNOG, OrthoFinder, Panther
409	FBgn0038750	CG4465	FastEpistasis	1	0	0	0	0	0	0	FBGN0038750	CG4465	42374	FBgn0038750	CG4465	Human	9356	10970	SLC22A6	4	3.93	moderate	No	No	Compara, eggNOG, OrthoFinder, Panther
409	FBgn0038750	CG4465	FastEpistasis	1	0	0	0	0	0	0	FBGN0038750	CG4465	42374	FBgn0038750	CG4465	Human	6584	10969	SLC22A5	4	3.93	moderate	No	No	Compara, eggNOG, OrthoFinder, Panther
409	FBgn0038750	CG4465	FastEpistasis	1	0	0	0	0	0	0	FBGN0038750	CG4465	42374	FBgn0038750	CG4465	Human	146429	27091	SLC22A31	3	2.93	moderate	No	Yes	Compara, eggNOG, Panther
409	FBgn0038750	CG4465	FastEpistasis	1	0	0	0	0	0	0	FBGN0038750	CG4465	42374	FBgn0038750	CG4465	Human	51310	23095	SLC22A17	3	2.93	moderate	No	Yes	Compara, eggNOG, Panther
409	FBgn0038750	CG4465	FastEpistasis	1	0	0	0	0	0	0	FBGN0038750	CG4465	42374	FBgn0038750	CG4465	Human	63027	21106	SLC22A23	3	2.93	moderate	No	Yes	Compara, eggNOG, Panther
410	FBgn0266354	CG9059	FastEpistasis	0	0	1	0	0	0	0	FBGN0266354	CG45002	32688	FBgn0266354	CG45002	Human	57628	20823	DPP10	6	5.88	moderate	Yes	No	eggNOG, Hieranoid, OrthoDB, Panther, Phylome, TreeFam
410	FBgn0266354	CG9059	FastEpistasis	0	0	1	0	0	0	0	FBGN0266354	CG45002	32688	FBgn0266354	CG45002	Human	1804	3010	DPP6	6	5.88	moderate	Yes	No	eggNOG, Hieranoid, OrthoDB, Panther, Phylome, TreeFam
410	FBgn0266354	CG9059	FastEpistasis	0	0	1	0	0	0	0	FBGN0266354	CG45002	32688	FBgn0266354	CG45002	Human	2191	3590	FAP	4	3.92	moderate	No	No	eggNOG, OrthoDB, Panther, Phylome
410	FBgn0266354	CG9059	FastEpistasis	0	0	1	0	0	0	0	FBGN0266354	CG45002	32688	FBgn0266354	CG45002	Human	1803	3009	DPP4	4	3.86	moderate	No	No	eggNOG, Isobase, Panther, Phylome
414	FBgn0028744	CG5033	FastEpistasis	0	0	0	0	0	1	0	FBGN0028744	CG5033	37036	FBgn0028744	CG5033	Human	102465906	50149	MIR7112	2	1.94	moderate	No	Yes	Compara, OMA
416	FBgn0037807	CG6293	FastEpistasis	0	1	0	0	0	0	0	FBGN0037807	CG6293	41259	FBgn0037807	CG6293	Human	9963	10974	SLC23A1	13	12.8	moderate	No	Yes	Compara, eggNOG, Hieranoid, Inparanoid, OMA, OrthoDB, OrthoFinder, OrthoInspector, orthoMCL, Panther, Phylome, RoundUp, TreeFam
416	FBgn0037807	CG6293	FastEpistasis	0	1	0	0	0	0	0	FBGN0037807	CG6293	41259	FBgn0037807	CG6293	Human	151295	20601	SLC23A3	4	4.01	moderate	No	Yes	eggNOG, OrthoDB, OrthoFinder, Panther
419	FBgn0038127	CG8476	FastEpistasis	0	0	0	0	1	1	0	FBGN0038127	CG8476	41624	FBgn0038127	CG8476	Human	3338	5271	DNAJC4	3	3	moderate	Yes	No	OrthoDB, RoundUp, TreeFam
419	FBgn0038127	CG8476	FastEpistasis	0	0	0	0	1	1	0	FBGN0038127	CG8476	41624	FBgn0038127	CG8476	Human	4189	6968	DNAJB9	2	2	moderate	No	Yes	eggNOG, Panther
421	FBgn0263132	Cht6	FastEpistasis	0	0	0	0	0	0	1	FBGN0263132	Cht6	31935	FBgn0263132	Cht6	Human	1118	1936	CHIT1	5	5.04	moderate	Yes	No	eggNOG, OrthoDB, OrthoFinder, Panther, RoundUp
421	FBgn0263132	Cht6	FastEpistasis	0	0	0	0	0	0	1	FBGN0263132	Cht6	31935	FBgn0263132	Cht6	Human	5016	8524	OVGP1	5	4.96	moderate	Yes	No	eggNOG, Isobase, OrthoDB, OrthoFinder, Panther
421	FBgn0263132	Cht6	FastEpistasis	0	0	0	0	0	0	1	FBGN0263132	Cht6	31935	FBgn0263132	Cht6	Human	1116	1932	CHI3L1	4	4.01	moderate	No	No	eggNOG, OrthoDB, OrthoFinder, Panther
421	FBgn0263132	Cht6	FastEpistasis	0	0	0	0	0	0	1	FBGN0263132	Cht6	31935	FBgn0263132	Cht6	Human	27159	17432	CHIA	4	3.94	moderate	No	No	eggNOG, OrthoDB, OrthoFinder, RoundUp
422	FBgn0053696	CG33696	FastEpistasis	0	0	0	0	0	0	1	FBGN0053696	CNMaR	39127	FBgn0053696	CNMaR	Human	124274	19995	GPR139	2	1.84	moderate	Yes	No	Compara, Phylome
423	FBgn0015622	Cnx99A	FastEpistasis	0	0	0	0	0	0	1	FBGN0015622	Cnx99A	44643	FBgn0015622	Cnx99A	Human	821	1473	CANX	13	12.83	moderate	Yes	No	Compara, eggNOG, Hieranoid, Homologene, Inparanoid, Isobase, OrthoDB, OrthoFinder, OrthoInspector, orthoMCL, Panther, RoundUp, TreeFam
423	FBgn0015622	Cnx99A	FastEpistasis	0	0	0	0	0	0	1	FBGN0015622	Cnx99A	44643	FBgn0015622	Cnx99A	Human	1047	2060	CLGN	10	9.85	moderate	No	No	Compara, eggNOG, Hieranoid, Inparanoid, OrthoDB, OrthoFinder, OrthoInspector, orthoMCL, Panther, TreeFam
425	FBgn0004198	ct	FastEpistasis	0	0	1	0	0	0	0	FBGN0004198	ct	44540	FBgn0004198	ct	Human	1523	2557	CUX1	10	9.82	moderate	No	Yes	Compara, eggNOG, Hieranoid, Inparanoid, OrthoFinder, OrthoInspector, orthoMCL, Panther, Phylome, RoundUp
426	FBgn0039637	CG11880	FastEpistasis	0	1	0	0	0	0	0	FBGN0039637	Ctl2	43440	FBgn0039637	Ctl2	Human	204962	28524	SLC44A5	12	11.87	moderate	No	Yes	eggNOG, Hieranoid, Inparanoid, OMA, OrthoDB, OrthoFinder, OrthoInspector, orthoMCL, Panther, Phylome, RoundUp, TreeFam
429	FBgn0034053	Cyp4aa1	FastEpistasis	0	0	0	1	0	0	0	FBGN0034053	Cyp4aa1	36752	FBgn0034053	Cyp4aa1	Human	285440	23198	CYP4V2	4	3.93	moderate	Yes	No	Compara, eggNOG, Hieranoid, Panther
430	FBgn0031461	daw	FastEpistasis	0	1	0	0	0	0	0	FBGN0031461	daw	33474	FBgn0031461	daw	Human	83729	24029	INHBE	4	3.87	moderate	Yes	No	eggNOG, OrthoDB, OrthoFinder, TreeFam
430	FBgn0031461	daw	FastEpistasis	0	1	0	0	0	0	0	FBGN0031461	daw	33474	FBgn0031461	daw	Human	3626	6068	INHBC	4	3.82	moderate	Yes	No	eggNOG, OrthoDB, OrthoFinder, Phylome
430	FBgn0031461	daw	FastEpistasis	0	1	0	0	0	0	0	FBGN0031461	daw	33474	FBgn0031461	daw	Human	7042	11768	TGFB2	3	2.96	moderate	No	Yes	eggNOG, Panther, TreeFam
430	FBgn0031461	daw	FastEpistasis	0	1	0	0	0	0	0	FBGN0031461	daw	33474	FBgn0031461	daw	Human	4838	7865	NODAL	3	2.93	moderate	No	Yes	Compara, eggNOG, Panther
430	FBgn0031461	daw	FastEpistasis	0	1	0	0	0	0	0	FBGN0031461	daw	33474	FBgn0031461	daw	Human	10637	6552	LEFTY1	2	2	moderate	No	Yes	eggNOG, Panther
430	FBgn0031461	daw	FastEpistasis	0	1	0	0	0	0	0	FBGN0031461	daw	33474	FBgn0031461	daw	Human	27302	20869	BMP10	2	2	moderate	No	Yes	eggNOG, Panther
430	FBgn0031461	daw	FastEpistasis	0	1	0	0	0	0	0	FBGN0031461	daw	33474	FBgn0031461	daw	Human	8200	4220	GDF5	2	2	moderate	No	Yes	eggNOG, Panther
430	FBgn0031461	daw	FastEpistasis	0	1	0	0	0	0	0	FBGN0031461	daw	33474	FBgn0031461	daw	Human	392255	4221	GDF6	2	2	moderate	No	Yes	eggNOG, Panther
430	FBgn0031461	daw	FastEpistasis	0	1	0	0	0	0	0	FBGN0031461	daw	33474	FBgn0031461	daw	Human	2658	4217	GDF2	2	2	moderate	No	Yes	eggNOG, Panther
430	FBgn0031461	daw	FastEpistasis	0	1	0	0	0	0	0	FBGN0031461	daw	33474	FBgn0031461	daw	Human	2661	4224	GDF9	2	2	moderate	No	Yes	eggNOG, Panther
430	FBgn0031461	daw	FastEpistasis	0	1	0	0	0	0	0	FBGN0031461	daw	33474	FBgn0031461	daw	Human	7044	3122	LEFTY2	2	2	moderate	No	Yes	eggNOG, Panther
430	FBgn0031461	daw	FastEpistasis	0	1	0	0	0	0	0	FBGN0031461	daw	33474	FBgn0031461	daw	Human	2662	4215	GDF10	2	2	moderate	No	Yes	eggNOG, Panther
430	FBgn0031461	daw	FastEpistasis	0	1	0	0	0	0	0	FBGN0031461	daw	33474	FBgn0031461	daw	Human	3623	6065	INHA	2	2	moderate	No	Yes	eggNOG, Panther
430	FBgn0031461	daw	FastEpistasis	0	1	0	0	0	0	0	FBGN0031461	daw	33474	FBgn0031461	daw	Human	9210	1068	BMP15	2	2	moderate	No	Yes	eggNOG, Panther
430	FBgn0031461	daw	FastEpistasis	0	1	0	0	0	0	0	FBGN0031461	daw	33474	FBgn0031461	daw	Human	651	1070	BMP3	2	2	moderate	No	Yes	eggNOG, Panther
430	FBgn0031461	daw	FastEpistasis	0	1	0	0	0	0	0	FBGN0031461	daw	33474	FBgn0031461	daw	Human	151449	4222	GDF7	2	2	moderate	No	Yes	eggNOG, Panther
432	FBgn0013810	Dhc36C	FastEpistasis	0	0	1	0	0	0	0	FBGN0013810	Dhc36C	35061	FBgn0013810	Dhc36C	Human	201625	2943	DNAH12	4	3.81	moderate	No	No	eggNOG, OrthoDB, OrthoFinder, orthoMCL
432	FBgn0013810	Dhc36C	FastEpistasis	0	0	1	0	0	0	0	FBGN0013810	Dhc36C	35061	FBgn0013810	Dhc36C	Human	55567	2949	DNAH3	4	3.81	moderate	No	No	eggNOG, OrthoDB, OrthoFinder, orthoMCL
433	FBgn0011582	DopR	FastEpistasis	0	0	0	0	0	0	1	FBGN0011582	Dop1R1	41726	FBgn0011582	Dop1R1	Human	1812	3020	DRD1	6	5.94	moderate	No	Yes	eggNOG, Hieranoid, Inparanoid, OrthoInspector, RoundUp, TreeFam
436	FBgn0040823	dpr6	FastEpistasis	0	0	1	0	1	0	0	FBGN0040823	dpr6	50296	FBgn0040823	dpr6	Human	4045	6705	LSAMP	2	1.81	moderate	Yes	No	eggNOG, Phylome
438	FBgn0020307	dve	FastEpistasis	0	0	0	0	1	0	0	FBGN0020307	dve	37546	FBgn0020307	dve	Human	23314	21637	SATB2	6	5.96	moderate	No	Yes	Compara, eggNOG, OrthoFinder, OrthoInspector, Panther, RoundUp
440	FBgn0000547	ed	FastEpistasis	1	0	0	0	0	0	0	FBGN0000547	ed	33619	FBgn0000547	ed	Human	4868	7908	NPHS1	2	2	moderate	Yes	No	eggNOG, Panther
441	FBgn0003731	Egfr	FastEpistasis	0	0	0	0	0	1	0	FBGN0003731	Egfr	37455	FBgn0003731	Egfr	Human	2066	3432	ERBB4	10	9.86	moderate	No	Yes	eggNOG, Inparanoid, OMA, OrthoFinder, OrthoInspector, orthoMCL, Panther, Phylome, RoundUp, TreeFam
441	FBgn0003731	Egfr	FastEpistasis	0	0	0	0	0	1	0	FBGN0003731	Egfr	37455	FBgn0003731	Egfr	Human	2064	3430	ERBB2	10	9.84	moderate	No	Yes	eggNOG, Inparanoid, OMA, OrthoDB, OrthoFinder, OrthoInspector, orthoMCL, Panther, Phylome, TreeFam
441	FBgn0003731	Egfr	FastEpistasis	0	0	0	0	0	1	0	FBGN0003731	Egfr	37455	FBgn0003731	Egfr	Human	2065	3431	ERBB3	9	8.83	moderate	No	Yes	eggNOG, Inparanoid, OrthoDB, OrthoFinder, OrthoInspector, orthoMCL, Panther, Phylome, TreeFam
442	FBgn0026250	eIF-1A	FastEpistasis	0	0	0	0	0	0	1	FBGN0026250	eIF1A	44260	FBgn0026250	eIF1A	Human	1964	3250	EIF1AX	12	11.79	moderate	No	Yes	Compara, eggNOG, Hieranoid, Inparanoid, OMA, OrthoFinder, OrthoInspector, orthoMCL, Panther, Phylome, RoundUp, TreeFam
444	FBgn0011589	elk	FastEpistasis	0	0	0	0	0	1	0	FBGN0011589	Elk	37047	FBgn0011589	Elk	Human	23416	6252	KCNH3	11	10.88	moderate	No	Yes	Compara, eggNOG, Hieranoid, Inparanoid, OrthoDB, OrthoFinder, OrthoInspector, orthoMCL, Panther, RoundUp, TreeFam
444	FBgn0011589	elk	FastEpistasis	0	0	0	0	0	1	0	FBGN0011589	Elk	37047	FBgn0011589	Elk	Human	23415	6253	KCNH4	10	9.85	moderate	No	Yes	Compara, eggNOG, Hieranoid, Inparanoid, OrthoDB, OrthoFinder, OrthoInspector, orthoMCL, Panther, TreeFam
445	FBgn0037534	CG2781	FastEpistasis	0	0	0	0	0	1	0	FBGN0037534	CG2781	40943	FBgn0037534	ELOVL	Human	64834	14418	ELOVL1	11	10.97	moderate	No	No	eggNOG, Hieranoid, Inparanoid, OMA, OrthoDB, OrthoFinder, OrthoInspector, Panther, Phylome, RoundUp, TreeFam
445	FBgn0037534	CG2781	FastEpistasis	0	0	0	0	0	1	0	FBGN0037534	CG2781	40943	FBgn0037534	ELOVL	Human	6785	14415	ELOVL4	5	4.84	moderate	No	No	eggNOG, OrthoDB, OrthoFinder, orthoMCL, RoundUp
445	FBgn0037534	CG2781	FastEpistasis	0	0	0	0	0	1	0	FBGN0037534	CG2781	40943	FBgn0037534	ELOVL	Human	54898	14416	ELOVL2	5	4.84	moderate	No	No	eggNOG, OrthoDB, OrthoFinder, orthoMCL, RoundUp
445	FBgn0037534	CG2781	FastEpistasis	0	0	0	0	0	1	0	FBGN0037534	CG2781	40943	FBgn0037534	ELOVL	Human	60481	21308	ELOVL5	4	3.94	moderate	No	No	eggNOG, OrthoDB, OrthoFinder, RoundUp
445	FBgn0037534	CG2781	FastEpistasis	0	0	0	0	0	1	0	FBGN0037534	CG2781	40943	FBgn0037534	ELOVL	Human	102466723	50219	MIR6734	2	1.94	moderate	No	Yes	Compara, OMA
447	FBgn0086675	fne	FastEpistasis	0	0	0	0	0	0	1	FBGN0086675	fne	32245	FBgn0086675	fne	Human	1996	3315	ELAVL4	13	12.82	moderate	No	Yes	eggNOG, Hieranoid, Inparanoid, Isobase, OMA, OrthoDB, OrthoFinder, OrthoInspector, orthoMCL, Panther, Phylome, RoundUp, TreeFam
447	FBgn0086675	fne	FastEpistasis	0	0	0	0	0	0	1	FBGN0086675	fne	32245	FBgn0086675	fne	Human	1995	3314	ELAVL3	10	9.96	moderate	No	Yes	eggNOG, Hieranoid, Inparanoid, OMA, OrthoFinder, OrthoInspector, Panther, Phylome, RoundUp, TreeFam
447	FBgn0086675	fne	FastEpistasis	0	0	0	0	0	0	1	FBGN0086675	fne	32245	FBgn0086675	fne	Human	1994	3312	ELAVL1	10	9.88	moderate	No	Yes	eggNOG, Hieranoid, Inparanoid, Isobase, OMA, OrthoFinder, OrthoInspector, Panther, Phylome, TreeFam
448	FBgn0004516	Gad1	FastEpistasis	0	0	0	0	1	0	0	FBGN0004516	Gad1	38484	FBgn0004516	Gad1	Human	2572	4093	GAD2	13	12.72	moderate	No	Yes	Compara, eggNOG, Hieranoid, Inparanoid, Isobase, OMA, OrthoDB, OrthoFinder, OrthoInspector, orthoMCL, Panther, Phylome, TreeFam
448	FBgn0004516	Gad1	FastEpistasis	0	0	0	0	1	0	0	FBGN0004516	Gad1	38484	FBgn0004516	Gad1	Human	51380	18966	CSAD	4	3.81	moderate	No	No	eggNOG, OrthoDB, OrthoFinder, orthoMCL
448	FBgn0004516	Gad1	FastEpistasis	0	0	0	0	1	0	0	FBGN0004516	Gad1	38484	FBgn0004516	Gad1	Human	339896	27949	GADL1	4	3.81	moderate	No	No	eggNOG, OrthoDB, OrthoFinder, orthoMCL
449	FBgn0036862	Gbs-76A	FastEpistasis	0	0	0	1	0	0	0	FBGN0036862	Gbs-76A	40102	FBgn0036862	Gbs-76A	Human	79660	14942	PPP1R3B	5	5.04	moderate	No	No	eggNOG, OrthoDB, OrthoFinder, Panther, RoundUp
449	FBgn0036862	Gbs-76A	FastEpistasis	0	0	0	1	0	0	0	FBGN0036862	Gbs-76A	40102	FBgn0036862	Gbs-76A	Human	5507	9293	PPP1R3C	5	5.04	moderate	No	No	eggNOG, OrthoDB, OrthoFinder, Panther, RoundUp
449	FBgn0036862	Gbs-76A	FastEpistasis	0	0	0	1	0	0	0	FBGN0036862	Gbs-76A	40102	FBgn0036862	Gbs-76A	Human	90673	14943	PPP1R3E	5	4.8	moderate	No	Yes	eggNOG, OrthoFinder, Phylome, RoundUp, TreeFam
449	FBgn0036862	Gbs-76A	FastEpistasis	0	0	0	1	0	0	0	FBGN0036862	Gbs-76A	40102	FBgn0036862	Gbs-76A	Human	648791	14945	PPP1R3G	4	3.78	moderate	No	Yes	eggNOG, OrthoDB, Phylome, TreeFam
450	FBgn0042135	CG18812	FastEpistasis	0	0	0	0	1	0	0	FBGN0042135	CG18812	59173	FBgn0042135	Gdap2	Human	28992	29598	MACROD1	2	1.91	moderate	No	Yes	eggNOG, OrthoDB
450	FBgn0042135	CG18812	FastEpistasis	0	0	0	0	1	0	0	FBGN0042135	CG18812	59173	FBgn0042135	Gdap2	Human	140733	16126	MACROD2	2	1.91	moderate	No	Yes	eggNOG, OrthoDB
451	FBgn0262869	mun	FastEpistasis	0	0	0	0	1	0	0	FBGN0262869	Gfrl	3346162	FBgn0262869	Gfrl	Human	2674	4243	GFRA1	3	2.94	moderate	No	Yes	Compara, Panther, Phylome
451	FBgn0262869	mun	FastEpistasis	0	0	0	0	1	0	0	FBGN0262869	Gfrl	3346162	FBgn0262869	Gfrl	Human	2675	4244	GFRA2	3	2.94	moderate	No	Yes	Compara, Panther, Phylome
451	FBgn0262869	mun	FastEpistasis	0	0	0	0	1	0	0	FBGN0262869	Gfrl	3346162	FBgn0262869	Gfrl	Human	2676	4245	GFRA3	3	2.94	moderate	No	Yes	Compara, Panther, Phylome
451	FBgn0262869	mun	FastEpistasis	0	0	0	0	1	0	0	FBGN0262869	Gfrl	3346162	FBgn0262869	Gfrl	Human	64096	13821	GFRA4	3	2.94	moderate	No	Yes	Compara, Panther, Phylome
453	FBgn0259211	grh	FastEpistasis	0	1	0	0	0	0	0	FBGN0259211	grh	37038	FBgn0259211	grh	Human	79977	2799	GRHL2	7	6.81	moderate	No	Yes	eggNOG, Hieranoid, OrthoFinder, OrthoInspector, orthoMCL, Panther, Phylome
453	FBgn0259211	grh	FastEpistasis	0	1	0	0	0	0	0	FBGN0259211	grh	37038	FBgn0259211	grh	Human	57822	25839	GRHL3	6	5.91	moderate	No	Yes	eggNOG, Hieranoid, OrthoFinder, OrthoInspector, Panther, Phylome
454	FBgn0029830	Grip	FastEpistasis	0	0	0	1	0	0	0	FBGN0029830	Grip	50391	FBgn0029830	Grip	Human	80852	23841	GRIP2	7	7.01	moderate	No	Yes	Inparanoid, OMA, OrthoDB, OrthoFinder, OrthoInspector, Phylome, RoundUp
455	FBgn0033817	GstE14	FastEpistasis	0	0	0	0	0	1	0	FBGN0033817	GstE14	36467	FBgn0033817	GstE14	Human	2952	4641	GSTT1	2	2.01	moderate	Yes	No	OrthoDB, OrthoFinder
455	FBgn0033817	GstE14	FastEpistasis	0	0	0	0	0	1	0	FBGN0033817	GstE14	36467	FBgn0033817	GstE14	Human	2953	4642	GSTT2	2	2.01	moderate	Yes	No	OrthoDB, OrthoFinder
455	FBgn0033817	GstE14	FastEpistasis	0	0	0	0	0	1	0	FBGN0033817	GstE14	36467	FBgn0033817	GstE14	Human	25774	26930	GSTT4	2	2.01	moderate	Yes	No	OrthoDB, OrthoFinder
455	FBgn0033817	GstE14	FastEpistasis	0	0	0	0	0	1	0	FBGN0033817	GstE14	36467	FBgn0033817	GstE14	Human	653689	33437	GSTT2B	2	1.9	moderate	Yes	No	eggNOG, OrthoFinder
457	FBgn0011224	heph	FastEpistasis	0	0	0	0	1	0	0	FBGN0011224	heph	48571	FBgn0011224	heph	Human	282996	27424	RBM20	2	2.11	moderate	No	Yes	OrthoDB, Panther
457	FBgn0011224	heph	FastEpistasis	0	0	0	0	1	0	0	FBGN0011224	heph	48571	FBgn0011224	heph	Human	100616459	41868	MIR4745	2	1.94	moderate	No	Yes	Compara, OMA
459	FBgn0011276	HLH3B	FastEpistasis	0	1	0	0	0	0	0	FBGN0011276	HLH3B	31249	FBgn0011276	HLH3B	Human	6886	11556	TAL1	6	5.99	moderate	No	Yes	eggNOG, OrthoFinder, OrthoInspector, Panther, RoundUp, TreeFam
459	FBgn0011276	HLH3B	FastEpistasis	0	1	0	0	0	0	0	FBGN0011276	HLH3B	31249	FBgn0011276	HLH3B	Human	4066	6734	LYL1	5	4.99	moderate	No	Yes	eggNOG, OrthoInspector, Panther, RoundUp, TreeFam
460	FBgn0004914	Hnf4	FastEpistasis	1	0	0	0	0	0	0	FBGN0004914	Hnf4	44544	FBgn0004914	Hnf4	Human	3172	5024	HNF4A	10	9.85	moderate	No	Yes	eggNOG, Hieranoid, Inparanoid, OrthoFinder, OrthoInspector, orthoMCL, Panther, Phylome, RoundUp, TreeFam
463	FBgn0038755	Hs6st	FastEpistasis	0	0	0	0	0	0	1	FBGN0038755	Hs6st	42380	FBgn0038755	Hs6st	Human	266722	19134	HS6ST3	13	12.74	moderate	No	Yes	Compara, eggNOG, Hieranoid, Inparanoid, Isobase, OrthoDB, OrthoFinder, OrthoInspector, orthoMCL, Panther, Phylome, RoundUp, TreeFam
463	FBgn0038755	Hs6st	FastEpistasis	0	0	0	0	0	0	1	FBGN0038755	Hs6st	42380	FBgn0038755	Hs6st	Human	90161	19133	HS6ST2	11	10.76	moderate	No	Yes	Compara, eggNOG, Hieranoid, Inparanoid, OrthoDB, OrthoFinder, OrthoInspector, orthoMCL, Panther, Phylome, TreeFam
464	FBgn0031728	Hsp60C	FastEpistasis	1	0	0	0	0	0	0	FBGN0031728	Hsp60C	33796	FBgn0031728	Hsp60C	Human	3329	5261	HSPD1	13	12.72	moderate	Yes	No	Compara, eggNOG, Hieranoid, Inparanoid, Isobase, OMA, OrthoDB, OrthoFinder, OrthoInspector, orthoMCL, Panther, Phylome, TreeFam
465	FBgn0031294	IA-2	FastEpistasis	0	0	1	0	0	0	0	FBGN0031294	IA-2	33277	FBgn0031294	IA-2	Human	5799	9677	PTPRN2	10	9.96	moderate	No	Yes	eggNOG, Hieranoid, Inparanoid, OrthoDB, OrthoFinder, OrthoInspector, Panther, Phylome, RoundUp, TreeFam
466	FBgn0011603	ine	FastEpistasis	0	0	0	0	0	1	0	FBGN0011603	ine	33659	FBgn0011603	ine	Human	6533	11052	SLC6A6	4	3.94	moderate	Yes	No	Compara, eggNOG, OrthoDB, Panther
466	FBgn0011603	ine	FastEpistasis	0	0	0	0	0	1	0	FBGN0011603	ine	33659	FBgn0011603	ine	Human	6540	11046	SLC6A13	4	3.79	moderate	Yes	No	Compara, eggNOG, Isobase, OrthoDB
470	FBgn0039862	kek6	FastEpistasis	0	0	0	0	1	0	0	FBGN0039862	kek6	43729	FBgn0039862	kek6	Human	441381	28947	LRRC24	2	1.96	moderate	Yes	No	OrthoFinder, TreeFam
473	FBgn0010240	Lcch3	FastEpistasis	0	1	0	0	0	0	0	FBGN0010240	Lcch3	32554	FBgn0010240	Lcch3	Human	2561	4082	GABRB2	12	11.87	moderate	No	Yes	eggNOG, Hieranoid, Inparanoid, OMA, OrthoDB, OrthoFinder, OrthoInspector, orthoMCL, Panther, Phylome, RoundUp, TreeFam
473	FBgn0010240	Lcch3	FastEpistasis	0	1	0	0	0	0	0	FBGN0010240	Lcch3	32554	FBgn0010240	Lcch3	Human	55879	14454	GABRQ	5	4.88	moderate	No	Yes	eggNOG, OrthoDB, Panther, Phylome, TreeFam
473	FBgn0010240	Lcch3	FastEpistasis	0	1	0	0	0	0	0	FBGN0010240	Lcch3	32554	FBgn0010240	Lcch3	Human	200959	17969	GABRR3	3	3.01	moderate	No	Yes	eggNOG, OrthoDB, Panther
473	FBgn0010240	Lcch3	FastEpistasis	0	1	0	0	0	0	0	FBGN0010240	Lcch3	32554	FBgn0010240	Lcch3	Human	2563	4084	GABRD	3	3.01	moderate	No	Yes	eggNOG, OrthoDB, Panther
481	FBgn0283521	lola	FastEpistasis	0	0	0	0	0	0	1	FBGN0283521	lola	44548	FBgn0283521	lola	Human	643376	37214	BTBD18	2	2	moderate	Yes	No	OrthoFinder, OrthoInspector
482	FBgn0066101	LpR1	FastEpistasis	0	0	0	1	0	0	0	FBGN0066101	LpR1	2768687	FBgn0066101	LpR1	Human	7436	12698	VLDLR	11	11.06	moderate	Yes	No	Hieranoid, Homologene, Inparanoid, Isobase, OMA, OrthoDB, OrthoFinder, OrthoInspector, Panther, Phylome, RoundUp
482	FBgn0066101	LpR1	FastEpistasis	0	0	0	1	0	0	0	FBGN0066101	LpR1	2768687	FBgn0066101	LpR1	Human	3949	6547	LDLR	9	9.11	moderate	No	No	Hieranoid, Inparanoid, OMA, OrthoDB, OrthoFinder, OrthoInspector, Panther, Phylome, RoundUp
482	FBgn0066101	LpR1	FastEpistasis	0	0	0	1	0	0	0	FBGN0066101	LpR1	2768687	FBgn0066101	LpR1	Human	7804	6700	LRP8	9	9.11	moderate	No	No	Hieranoid, Inparanoid, OMA, OrthoDB, OrthoFinder, OrthoInspector, Panther, Phylome, RoundUp
483	FBgn0028582	lqf	FastEpistasis	0	0	0	1	0	0	0	FBGN0028582	lqf	38846	FBgn0028582	lqf	Human	22905	18639	EPN2	12	11.79	moderate	No	Yes	Compara, eggNOG, Hieranoid, Inparanoid, OrthoDB, OrthoFinder, OrthoInspector, orthoMCL, Panther, Phylome, RoundUp, TreeFam
483	FBgn0028582	lqf	FastEpistasis	0	0	0	1	0	0	0	FBGN0028582	lqf	38846	FBgn0028582	lqf	Human	55040	18235	EPN3	11	10.76	moderate	No	Yes	Compara, eggNOG, Hieranoid, Inparanoid, OrthoDB, OrthoFinder, OrthoInspector, orthoMCL, Panther, Phylome, TreeFam
483	FBgn0028582	lqf	FastEpistasis	0	0	0	1	0	0	0	FBGN0028582	lqf	38846	FBgn0028582	lqf	Human	150350	26352	ENTHD1	4	3.94	moderate	No	Yes	Compara, eggNOG, OrthoDB, Panther
484	FBgn0040765	luna	FastEpistasis	1	0	1	1	0	0	0	FBGN0040765	luna	2768719	FBgn0040765	luna	Human	688	6349	KLF5	5	5.04	moderate	No	Yes	Compara, Hieranoid, Inparanoid, Panther, TreeFam
484	FBgn0040765	luna	FastEpistasis	1	0	1	1	0	0	0	FBGN0040765	luna	2768719	FBgn0040765	luna	Human	10365	6347	KLF2	2	2.03	moderate	No	Yes	Compara, Panther
484	FBgn0040765	luna	FastEpistasis	1	0	1	1	0	0	0	FBGN0040765	luna	2768719	FBgn0040765	luna	Human	10661	6345	KLF1	2	2.03	moderate	No	Yes	Compara, Panther
484	FBgn0040765	luna	FastEpistasis	1	0	1	1	0	0	0	FBGN0040765	luna	2768719	FBgn0040765	luna	Human	105378952	51793	KLF18	2	2.03	moderate	No	Yes	Compara, Panther
484	FBgn0040765	luna	FastEpistasis	1	0	1	1	0	0	0	FBGN0040765	luna	2768719	FBgn0040765	luna	Human	9314	6348	KLF4	2	2.03	moderate	No	Yes	Compara, Panther
485	FBgn0004797	mdy	FastEpistasis	0	0	1	0	0	0	0	FBGN0004797	mdy	44887	FBgn0004797	mdy	Human	102465511	50176	MIR6848	2	1.94	moderate	No	Yes	Compara, OMA
486	FBgn0265140	Meltrin	FastEpistasis	0	0	0	0	0	0	1	FBGN0265140	Meltrin	3772109	FBgn0265140	Meltrin	Human	8751	193	ADAM15	9	9	moderate	No	Yes	eggNOG, Hieranoid, Inparanoid, OrthoDB, OrthoFinder, OrthoInspector, Panther, Phylome, RoundUp
486	FBgn0265140	Meltrin	FastEpistasis	0	0	0	0	0	0	1	FBGN0265140	Meltrin	3772109	FBgn0265140	Meltrin	Human	101	215	ADAM8	8	7.99	moderate	No	Yes	eggNOG, Hieranoid, Inparanoid, OrthoFinder, OrthoInspector, Panther, Phylome, RoundUp
486	FBgn0265140	Meltrin	FastEpistasis	0	0	0	0	0	0	1	FBGN0265140	Meltrin	3772109	FBgn0265140	Meltrin	Human	80332	15478	ADAM33	8	7.97	moderate	No	Yes	eggNOG, Hieranoid, Inparanoid, OrthoDB, OrthoFinder, OrthoInspector, Panther, Phylome
486	FBgn0265140	Meltrin	FastEpistasis	0	0	0	0	0	0	1	FBGN0265140	Meltrin	3772109	FBgn0265140	Meltrin	Human	10863	206	ADAM28	8	7.95	moderate	No	Yes	eggNOG, Hieranoid, OrthoDB, OrthoFinder, OrthoInspector, Panther, Phylome, RoundUp
486	FBgn0265140	Meltrin	FastEpistasis	0	0	0	0	0	0	1	FBGN0265140	Meltrin	3772109	FBgn0265140	Meltrin	Human	8754	216	ADAM9	7	7.04	moderate	No	Yes	eggNOG, Hieranoid, OrthoDB, OrthoFinder, OrthoInspector, Panther, RoundUp
486	FBgn0265140	Meltrin	FastEpistasis	0	0	0	0	0	0	1	FBGN0265140	Meltrin	3772109	FBgn0265140	Meltrin	Human	8756	214	ADAM7	6	5.92	moderate	No	Yes	eggNOG, Hieranoid, OrthoDB, OrthoFinder, Panther, Phylome
486	FBgn0265140	Meltrin	FastEpistasis	0	0	0	0	0	0	1	FBGN0265140	Meltrin	3772109	FBgn0265140	Meltrin	Human	4185	189	ADAM11	4	4.04	moderate	No	No	eggNOG, OrthoDB, Panther, RoundUp
486	FBgn0265140	Meltrin	FastEpistasis	0	0	0	0	0	0	1	FBGN0265140	Meltrin	3772109	FBgn0265140	Meltrin	Human	53616	201	ADAM22	4	4.04	moderate	No	No	eggNOG, OrthoDB, Panther, RoundUp
486	FBgn0265140	Meltrin	FastEpistasis	0	0	0	0	0	0	1	FBGN0265140	Meltrin	3772109	FBgn0265140	Meltrin	Human	27299	16299	ADAMDEC1	4	3.92	moderate	No	Yes	eggNOG, OrthoDB, Panther, Phylome
486	FBgn0265140	Meltrin	FastEpistasis	0	0	0	0	0	0	1	FBGN0265140	Meltrin	3772109	FBgn0265140	Meltrin	Human	255926	212	ADAM5	2	2.01	moderate	No	Yes	Panther, Phylome
487	FBgn0050272	CG30272	FastEpistasis	0	0	0	0	1	0	0	FBGN0050272	MFS1	246519	FBgn0050272	MFS1	Human	10246	10930	SLC17A2	5	4.94	moderate	Yes	No	Compara, eggNOG, OrthoDB, OrthoFinder, Panther
487	FBgn0050272	CG30272	FastEpistasis	0	0	0	0	1	0	0	FBGN0050272	MFS1	246519	FBgn0050272	MFS1	Human	10786	10931	SLC17A3	5	4.94	moderate	Yes	No	Compara, eggNOG, OrthoDB, OrthoFinder, Panther
487	FBgn0050272	CG30272	FastEpistasis	0	0	0	0	1	0	0	FBGN0050272	MFS1	246519	FBgn0050272	MFS1	Human	10050	10932	SLC17A4	4	3.93	moderate	No	No	Compara, eggNOG, OrthoFinder, Panther
487	FBgn0050272	CG30272	FastEpistasis	0	0	0	0	1	0	0	FBGN0050272	MFS1	246519	FBgn0050272	MFS1	Human	6568	10929	SLC17A1	4	3.93	moderate	No	No	Compara, eggNOG, OrthoFinder, Panther
487	FBgn0050272	CG30272	FastEpistasis	0	0	0	0	1	0	0	FBGN0050272	MFS1	246519	FBgn0050272	MFS1	Human	26503	10933	SLC17A5	4	3.93	moderate	No	No	Compara, eggNOG, OrthoFinder, Panther
487	FBgn0050272	CG30272	FastEpistasis	0	0	0	0	1	0	0	FBGN0050272	MFS1	246519	FBgn0050272	MFS1	Human	57030	16704	SLC17A7	4	3.84	moderate	No	No	Compara, eggNOG, OrthoDB, OrthoFinder
487	FBgn0050272	CG30272	FastEpistasis	0	0	0	0	1	0	0	FBGN0050272	MFS1	246519	FBgn0050272	MFS1	Human	246213	20151	SLC17A8	4	3.84	moderate	No	No	Compara, eggNOG, OrthoDB, OrthoFinder
488	FBgn0264695	Mhc	FastEpistasis	0	1	0	0	0	0	0	FBGN0264695	Mhc	35007	FBgn0264695	Mhc	Human	4624	7576	MYH6	11	10.86	moderate	No	Yes	eggNOG, Hieranoid, Inparanoid, OMA, OrthoFinder, OrthoInspector, orthoMCL, Panther, Phylome, RoundUp, TreeFam
488	FBgn0264695	Mhc	FastEpistasis	0	1	0	0	0	0	0	FBGN0264695	Mhc	35007	FBgn0264695	Mhc	Human	4622	7574	MYH4	10	9.9	moderate	No	Yes	eggNOG, Hieranoid, Inparanoid, OMA, OrthoFinder, OrthoInspector, orthoMCL, Panther, Phylome, RoundUp
488	FBgn0264695	Mhc	FastEpistasis	0	1	0	0	0	0	0	FBGN0264695	Mhc	35007	FBgn0264695	Mhc	Human	4619	7567	MYH1	10	9.9	moderate	No	Yes	eggNOG, Hieranoid, Inparanoid, OMA, OrthoFinder, OrthoInspector, orthoMCL, Panther, Phylome, RoundUp
488	FBgn0264695	Mhc	FastEpistasis	0	1	0	0	0	0	0	FBGN0264695	Mhc	35007	FBgn0264695	Mhc	Human	57644	15906	MYH7B	10	9.83	moderate	No	Yes	eggNOG, Hieranoid, Inparanoid, OMA, OrthoFinder, OrthoInspector, orthoMCL, Panther, Phylome, TreeFam
488	FBgn0264695	Mhc	FastEpistasis	0	1	0	0	0	0	0	FBGN0264695	Mhc	35007	FBgn0264695	Mhc	Human	22989	31073	MYH15	10	9.83	moderate	No	Yes	eggNOG, Hieranoid, Inparanoid, OMA, OrthoFinder, OrthoInspector, orthoMCL, Panther, Phylome, TreeFam
488	FBgn0264695	Mhc	FastEpistasis	0	1	0	0	0	0	0	FBGN0264695	Mhc	35007	FBgn0264695	Mhc	Human	8735	7571	MYH13	9	8.92	moderate	No	Yes	Hieranoid, Inparanoid, Isobase, OMA, OrthoFinder, OrthoInspector, orthoMCL, Panther, Phylome
488	FBgn0264695	Mhc	FastEpistasis	0	1	0	0	0	0	0	FBGN0264695	Mhc	35007	FBgn0264695	Mhc	Human	4626	7578	MYH8	9	8.87	moderate	No	Yes	eggNOG, Hieranoid, Inparanoid, OMA, OrthoFinder, OrthoInspector, orthoMCL, Panther, Phylome
488	FBgn0264695	Mhc	FastEpistasis	0	1	0	0	0	0	0	FBGN0264695	Mhc	35007	FBgn0264695	Mhc	Human	4621	7573	MYH3	9	8.87	moderate	No	Yes	eggNOG, Hieranoid, Inparanoid, OMA, OrthoFinder, OrthoInspector, orthoMCL, Panther, Phylome
488	FBgn0264695	Mhc	FastEpistasis	0	1	0	0	0	0	0	FBGN0264695	Mhc	35007	FBgn0264695	Mhc	Human	4620	7572	MYH2	9	8.87	moderate	No	Yes	eggNOG, Hieranoid, Inparanoid, OMA, OrthoFinder, OrthoInspector, orthoMCL, Panther, Phylome
489	FBgn0011661	Moe	FastEpistasis	0	0	0	0	1	0	0	FBGN0011661	Moe	31816	FBgn0011661	Moe	Human	7430	12691	EZR	13	12.8	moderate	No	Yes	Compara, eggNOG, Hieranoid, Inparanoid, OMA, OrthoDB, OrthoFinder, OrthoInspector, orthoMCL, Panther, Phylome, RoundUp, TreeFam
489	FBgn0011661	Moe	FastEpistasis	0	0	0	0	1	0	0	FBGN0011661	Moe	31816	FBgn0011661	Moe	Human	5962	9944	RDX	13	12.8	moderate	No	Yes	Compara, eggNOG, Hieranoid, Inparanoid, OMA, OrthoDB, OrthoFinder, OrthoInspector, orthoMCL, Panther, Phylome, RoundUp, TreeFam
490	FBgn0052296	Mrtf	FastEpistasis	0	0	1	0	1	0	0	FBGN0052296	Mrtf	38338	FBgn0052296	Mrtf	Human	57496	29819	MRTFB	9	8.84	moderate	No	Yes	Compara, eggNOG, Hieranoid, Inparanoid, OrthoFinder, OrthoInspector, orthoMCL, Panther, TreeFam
490	FBgn0052296	Mrtf	FastEpistasis	0	0	1	0	1	0	0	FBGN0052296	Mrtf	38338	FBgn0052296	Mrtf	Human	93649	16067	MYOCD	7	6.94	moderate	No	Yes	Compara, eggNOG, Hieranoid, Inparanoid, OrthoInspector, Panther, TreeFam
492	FBgn0266347	nAcRalpha-80B	FastEpistasis	0	0	1	0	0	0	0	FBGN0266347	nAChRalpha4	40521	FBgn0266347	nAChRalpha4	Human	1136	1957	CHRNA3	10	9.99	moderate	Yes	No	eggNOG, Hieranoid, Homologene, Inparanoid, OrthoDB, OrthoFinder, OrthoInspector, orthoMCL, Panther, RoundUp
492	FBgn0266347	nAcRalpha-80B	FastEpistasis	0	0	1	0	0	0	0	FBGN0266347	nAChRalpha4	40521	FBgn0266347	nAChRalpha4	Human	8973	15963	CHRNA6	9	8.99	moderate	No	No	eggNOG, Hieranoid, Inparanoid, OrthoDB, OrthoFinder, OrthoInspector, orthoMCL, Panther, RoundUp
492	FBgn0266347	nAcRalpha-80B	FastEpistasis	0	0	1	0	0	0	0	FBGN0266347	nAChRalpha4	40521	FBgn0266347	nAChRalpha4	Human	1135	1956	CHRNA2	9	8.99	moderate	No	No	eggNOG, Hieranoid, Inparanoid, OrthoDB, OrthoFinder, OrthoInspector, orthoMCL, Panther, RoundUp
492	FBgn0266347	nAcRalpha-80B	FastEpistasis	0	0	1	0	0	0	0	FBGN0266347	nAChRalpha4	40521	FBgn0266347	nAChRalpha4	Human	1137	1958	CHRNA4	7	6.96	moderate	No	No	eggNOG, Hieranoid, Inparanoid, OrthoDB, OrthoInspector, orthoMCL, Panther
492	FBgn0266347	nAcRalpha-80B	FastEpistasis	0	0	1	0	0	0	0	FBGN0266347	nAChRalpha4	40521	FBgn0266347	nAChRalpha4	Human	55584	14079	CHRNA9	2	1.85	moderate	No	Yes	eggNOG, Isobase
493	FBgn0032151	nAcRalpha-30D	FastEpistasis	0	1	0	0	0	0	0	FBGN0032151	nAChRalpha6	34304	FBgn0032151	nAChRalpha6	Human	89832	15781	CHRFAM7A	11	10.9	moderate	Yes	No	eggNOG, Hieranoid, Inparanoid, Isobase, OMA, OrthoFinder, OrthoInspector, orthoMCL, Panther, RoundUp, TreeFam
493	FBgn0032151	nAcRalpha-30D	FastEpistasis	0	1	0	0	0	0	0	FBGN0032151	nAChRalpha6	34304	FBgn0032151	nAChRalpha6	Human	1139	1960	CHRNA7	8	7.83	moderate	No	Yes	eggNOG, Isobase, OMA, OrthoDB, OrthoFinder, orthoMCL, Panther, TreeFam
494	FBgn0086778	gfA	FastEpistasis	0	0	1	0	0	0	0	FBGN0086778	nAChRalpha7	32928	FBgn0086778	nAChRalpha7	Human	1139	1960	CHRNA7	8	7.83	moderate	No	Yes	eggNOG, Isobase, OMA, OrthoDB, OrthoFinder, orthoMCL, Panther, TreeFam
495	FBgn0261617	nej	FastEpistasis	0	1	0	0	0	0	0	FBGN0261617	nej	43856	FBgn0261617	nej	Human	100302237	35359	MIR1281	2	1.94	moderate	No	Yes	Compara, OMA
496	FBgn0261673	nemy	FastEpistasis	0	0	0	0	0	0	1	FBGN0261673	nemy	36395	FBgn0261673	nemy	Human	1534	2571	CYB561	5	4.9	moderate	Yes	No	Compara, eggNOG, OrthoDB, Panther, TreeFam
496	FBgn0261673	nemy	FastEpistasis	0	0	0	0	0	0	1	FBGN0261673	nemy	36395	FBgn0261673	nemy	Human	220002	23014	CYB561A3	5	4.9	moderate	Yes	No	Compara, eggNOG, OrthoDB, Panther, TreeFam
496	FBgn0261673	nemy	FastEpistasis	0	0	0	0	0	0	1	FBGN0261673	nemy	36395	FBgn0261673	nemy	Human	79901	20797	CYBRD1	5	4.9	moderate	Yes	No	Compara, eggNOG, OrthoDB, Panther, TreeFam
497	FBgn0265416	Neto	FastEpistasis	0	0	0	1	0	0	0	FBGN0265416	Neto	32303	FBgn0265416	Neto	Human	81832	13823	NETO1	4	4.01	moderate	No	Yes	OrthoFinder, OrthoInspector, Panther, Phylome
503	FBgn0003044	Pcl	FastEpistasis	1	0	0	0	0	0	0	FBGN0003044	Pcl	37069	FBgn0003044	Pcl	Human	5252	8919	PHF1	10	9.88	moderate	No	Yes	Compara, eggNOG, Hieranoid, Inparanoid, OrthoFinder, OrthoInspector, Panther, Phylome, RoundUp, TreeFam
504	FBgn0085370	Pde11	FastEpistasis	0	0	0	0	0	1	0	FBGN0085370	Pde11	35107	FBgn0085370	Pde11	Human	50940	8773	PDE11A	6	5.74	moderate	No	No	Compara, eggNOG, OrthoDB, OrthoFinder, OrthoInspector, orthoMCL
504	FBgn0085370	Pde11	FastEpistasis	0	0	0	0	0	1	0	FBGN0085370	Pde11	35107	FBgn0085370	Pde11	Human	5146	8787	PDE6C	4	3.94	moderate	No	Yes	Compara, eggNOG, OrthoDB, Panther
504	FBgn0085370	Pde11	FastEpistasis	0	0	0	0	0	1	0	FBGN0085370	Pde11	35107	FBgn0085370	Pde11	Human	5145	8785	PDE6A	4	3.94	moderate	No	Yes	Compara, eggNOG, OrthoDB, Panther
504	FBgn0085370	Pde11	FastEpistasis	0	0	0	0	0	1	0	FBGN0085370	Pde11	35107	FBgn0085370	Pde11	Human	5158	8786	PDE6B	4	3.94	moderate	No	Yes	Compara, eggNOG, OrthoDB, Panther
504	FBgn0085370	Pde11	FastEpistasis	0	0	0	0	0	1	0	FBGN0085370	Pde11	35107	FBgn0085370	Pde11	Human	10846	8772	PDE10A	4	3.89	moderate	No	Yes	eggNOG, Isobase, OrthoDB, RoundUp
504	FBgn0085370	Pde11	FastEpistasis	0	0	0	0	0	1	0	FBGN0085370	Pde11	35107	FBgn0085370	Pde11	Human	27115	8792	PDE7B	3	2.84	moderate	No	Yes	Compara, eggNOG, OrthoDB
504	FBgn0085370	Pde11	FastEpistasis	0	0	0	0	0	1	0	FBGN0085370	Pde11	35107	FBgn0085370	Pde11	Human	5138	8777	PDE2A	3	2.84	moderate	No	Yes	Compara, eggNOG, OrthoDB
504	FBgn0085370	Pde11	FastEpistasis	0	0	0	0	0	1	0	FBGN0085370	Pde11	35107	FBgn0085370	Pde11	Human	5150	8791	PDE7A	3	2.84	moderate	No	Yes	Compara, eggNOG, OrthoDB
504	FBgn0085370	Pde11	FastEpistasis	0	0	0	0	0	1	0	FBGN0085370	Pde11	35107	FBgn0085370	Pde11	Human	5140	8779	PDE3B	2	1.94	moderate	No	Yes	Compara, OrthoDB
504	FBgn0085370	Pde11	FastEpistasis	0	0	0	0	0	1	0	FBGN0085370	Pde11	35107	FBgn0085370	Pde11	Human	5139	8778	PDE3A	2	1.94	moderate	No	Yes	Compara, OrthoDB
[truncated: 223 more rows]

## Sheet: Supplementary File 4b
Fly cardiac Mean GWAS genes and corresponding human orthologues associated to cardiac traits
	...1	Fly GeneID	GeneSymbol_dm3	method	AI	EDD	FS	HP	ESD	SI	DI	Fly GeneID_dm6	gene_symbol_dm6	Fly Gene ID	FlyBaseID	Fly Symbol	Species	Human GeneID	HGNCID	Human Symbol	DIOPT Score	Weighted Score	Rank	Best Score	Best Score Reverse	Prediction Derived From	SNP	trait	reference
1	3	FBgn0000114	aret	FastLMM_FastEpistasis	0	0	0	0	0	0	1	FBGN0000114	bru1	34648	FBgn0000114	bru1	Human	10658	2549	CELF1	14	13.75	high	Yes	Yes	Compara, eggNOG, Hieranoid, Inparanoid, Isobase, OMA, OrthoDB, OrthoFinder, OrthoInspector, orthoMCL, Panther, Phylome, RoundUp, TreeFam	rs3729989	ECG_traits_and_atrial_fibrilation	Verweij_et_al_2020
2	6	FBgn0052264	CG32264	FastLMM_FastEpistasis	0	0	0	1	0	0	0	FBGN0052264	CG32264	38438	FBgn0052264	CG32264	Human	221692	20990	PHACTR1	8	8.01	high	Yes	Yes	Compara, eggNOG, Hieranoid, Inparanoid, OrthoFinder, OrthoInspector, Panther, RoundUp	rs547691407	ECG_traits_and_atrial_fibrilation	Verweij_et_al_2020
3	49	FBgn0285896	btl	FastLMM	0	0	1	0	1	0	0	FBGN0285896	btl	39564	FBgn0285896	btl	Human	2260	3688	FGFR1	12	11.87	high	Yes	Yes	eggNOG, Hieranoid, Inparanoid, OMA, OrthoDB, OrthoFinder, OrthoInspector, orthoMCL, Panther, Phylome, RoundUp, TreeFam	rs881301	atrioventricular_electrical_activity	van_Setten_et_al_2018
4	49	FBgn0285896	btl	FastLMM	0	0	1	0	1	0	0	FBGN0285896	btl	39564	FBgn0285896	btl	Human	2260	3688	FGFR1	12	11.87	high	Yes	Yes	eggNOG, Hieranoid, Inparanoid, OMA, OrthoDB, OrthoFinder, OrthoInspector, orthoMCL, Panther, Phylome, RoundUp, TreeFam	rs62505473	ECG_traits_and_atrial_fibrilation	Verweij_et_al_2020
5	128	FBgn0039357	CG4743	FastLMM	0	1	0	0	0	0	0	FBGN0039357	CG4743	43101	FBgn0039357	CG4743	Human	115286	20661	SLC25A26	14	13.74	high	Yes	Yes	Compara, eggNOG, Hieranoid, Homologene, Inparanoid, Isobase, OMA, OrthoFinder, OrthoInspector, orthoMCL, Panther, Phylome, RoundUp, TreeFam	rs2242285	QRS_duration	Sotoodehnia_et_al_2010
6	128	FBgn0039357	CG4743	FastLMM	0	1	0	0	0	0	0	FBGN0039357	CG4743	43101	FBgn0039357	CG4743	Human	115286	20661	SLC25A26	14	13.74	high	Yes	Yes	Compara, eggNOG, Hieranoid, Homologene, Inparanoid, Isobase, OMA, OrthoFinder, OrthoInspector, orthoMCL, Panther, Phylome, RoundUp, TreeFam	rs2242285	Electrocardiographic_QRS_traits	van_der_Hast_et_al_2016
7	128	FBgn0039357	CG4743	FastLMM	0	1	0	0	0	0	0	FBGN0039357	CG4743	43101	FBgn0039357	CG4743	Human	115286	20661	SLC25A26	14	13.74	high	Yes	Yes	Compara, eggNOG, Hieranoid, Homologene, Inparanoid, Isobase, OMA, OrthoFinder, OrthoInspector, orthoMCL, Panther, Phylome, RoundUp, TreeFam	rs34080181	atrial_fibrillation	Nielsen_et_al_2018
8	128	FBgn0039357	CG4743	FastLMM	0	1	0	0	0	0	0	FBGN0039357	CG4743	43101	FBgn0039357	CG4743	Human	115286	20661	SLC25A26	14	13.74	high	Yes	Yes	Compara, eggNOG, Hieranoid, Homologene, Inparanoid, Isobase, OMA, OrthoFinder, OrthoInspector, orthoMCL, Panther, Phylome, RoundUp, TreeFam	rs332371	ECG_traits_and_atrial_fibrilation	Verweij_et_al_2020
9	150	FBgn0028847	CG9014	FastLMM	0	0	0	0	0	1	0	FBGN0028847	CG9014	34777	FBgn0028847	CG9014	Human	146310	23235	RNF151	5	4.94	high	Yes	Yes	Compara, eggNOG, OrthoDB, OrthoFinder, Panther	rs12924536	ECG_traits_and_atrial_fibrilation	Verweij_et_al_2020
10	192	FBgn0266084	Fhos	FastLMM	0	0	1	0	0	0	0	FBGN0266084	Fhos	39004	FBgn0266084	Fhos	Human	80206	26178	FHOD3	8	7.99	high	Yes	Yes	eggNOG, Hieranoid, Inparanoid, OrthoFinder, OrthoInspector, Panther, Phylome, RoundUp	rs879568	Electrocardiographic_QRS_traits	van_der_Hast_et_al_2016
11	192	FBgn0266084	Fhos	FastLMM	0	0	1	0	0	0	0	FBGN0266084	Fhos	39004	FBgn0266084	Fhos	Human	80206	26178	FHOD3	8	7.99	high	Yes	Yes	eggNOG, Hieranoid, Inparanoid, OrthoFinder, OrthoInspector, Panther, Phylome, RoundUp	rs61735998	Resting_heart_rate	Eppinga_et_al_2016
12	192	FBgn0266084	Fhos	FastLMM	0	0	1	0	0	0	0	FBGN0266084	Fhos	39004	FBgn0266084	Fhos	Human	80206	26178	FHOD3	8	7.99	high	Yes	Yes	eggNOG, Hieranoid, Inparanoid, OrthoFinder, OrthoInspector, Panther, Phylome, RoundUp	rs2848901	ECG_traits_and_atrial_fibrilation	Verweij_et_al_2020
13	206	FBgn0264574	Glut1	FastLMM	0	0	1	0	0	0	0	FBGN0264574	Glut1	38109	FBgn0264574	Glut1	Human	6513	11005	SLC2A1	10	9.96	high	Yes	Yes	eggNOG, Inparanoid, Isobase, OMA, OrthoDB, OrthoFinder, OrthoInspector, Panther, Phylome, RoundUp	rs16830359	Cardiac_hypertrophy	Parsa_et_al_2011
14	213	FBgn0052082	CG32082	FastLMM	0	0	0	1	0	0	0	FBGN0052082	IRSp53	39258	FBgn0052082	IRSp53	Human	10458	947	BAIAP2	10	9.89	high	Yes	Yes	Compara, Inparanoid, OMA, OrthoFinder, OrthoInspector, orthoMCL, Panther, Phylome, RoundUp, TreeFam	rs12051698	ECG_traits_and_atrial_fibrilation	Verweij_et_al_2020
15	252	FBgn0259735	CG42389	FastLMM	0	0	0	0	0	0	1	FBGN0259735	CG42389	34987	FBgn0259735	mtgo	Human	22862	20296	FNDC3A	12	11.78	high	Yes	Yes	Compara, eggNOG, Hieranoid, Homologene, Inparanoid, OrthoFinder, OrthoInspector, orthoMCL, Panther, Phylome, RoundUp, TreeFam	13:49534769_CT_C	ECG_traits_and_atrial_fibrilation	Verweij_et_al_2020
16	254	FBgn0031000	Muc18B	FastLMM	0	0	0	1	0	0	1	FBGN0031000	Muc18B	32913	FBgn0031000	Muc18B	Human	285834	27780	HCG22	3	3.03	high	Yes	Yes	OrthoFinder, OrthoInspector, RoundUp	rs9262635	HF	Meder_et_al_2014
17	275	FBgn0003089	pip	FastLMM	1	0	0	0	0	0	0	FBGN0003089	pip	40104	FBgn0003089	pip	Human	10090	17223	UST	5	4.8	high	Yes	Yes	Compara, eggNOG, Panther, Phylome, TreeFam	rs11798485 3	atrial_fibrilation	Roseli_et_al_2018
18	275	FBgn0003089	pip	FastLMM	1	0	0	0	0	0	0	FBGN0003089	pip	40104	FBgn0003089	pip	Human	10090	17223	UST	5	4.8	high	Yes	Yes	Compara, eggNOG, Panther, Phylome, TreeFam	rs117984853	atrial_fibrillation	Nielsen_et_al_2018
19	280	FBgn0004595	pros	FastLMM	0	0	0	0	0	1	0	FBGN0004595	pros	41363	FBgn0004595	pros	Human	5629	9459	PROX1	10	9.78	high	Yes	Yes	Compara, eggNOG, Hieranoid, Isobase, OrthoFinder, OrthoInspector, Panther, Phylome, RoundUp, TreeFam	rs340849	ECG_traits_and_atrial_fibrilation	Verweij_et_al_2020
20	281	FBgn0003169	put	FastLMM	0	0	1	0	0	0	0	FBGN0003169	put	41772	FBgn0003169	put	Human	93	174	ACVR2B	12	11.78	high	Yes	Yes	Compara, eggNOG, Hieranoid, Inparanoid, Isobase, OMA, OrthoFinder, OrthoInspector, orthoMCL, Panther, Phylome, RoundUp	rs62241772	ECG_traits_and_atrial_fibrilation	Verweij_et_al_2020
21	281	FBgn0003169	put	FastLMM	0	0	1	0	0	0	0	FBGN0003169	put	41772	FBgn0003169	put	Human	93	174	ACVR2B	12	11.78	high	Yes	Yes	Compara, eggNOG, Hieranoid, Inparanoid, Isobase, OMA, OrthoFinder, OrthoInspector, orthoMCL, Panther, Phylome, RoundUp	rs41312411	ECG_traits_and_atrial_fibrilation	Verweij_et_al_2020
22	281	FBgn0003169	put	FastLMM	0	0	1	0	0	0	0	FBGN0003169	put	41772	FBgn0003169	put	Human	93	174	ACVR2B	12	11.78	high	Yes	Yes	Compara, eggNOG, Hieranoid, Inparanoid, Isobase, OMA, OrthoFinder, OrthoInspector, orthoMCL, Panther, Phylome, RoundUp	rs572474770	ECG_traits_and_atrial_fibrilation	Verweij_et_al_2020
23	293	FBgn0003255	rk	FastLMM	0	0	0	1	0	0	0	FBGN0003255	rk	34819	FBgn0003255	rk	Human	8549	4504	LGR5	9	8.97	high	Yes	Yes	eggNOG, Hieranoid, Homologene, Inparanoid, Isobase, OrthoDB, OrthoInspector, Panther, TreeFam	rs1149003	ECG_traits_and_atrial_fibrilation	Verweij_et_al_2020
24	303	FBgn0085450	Snoo	FastLMM	0	1	1	0	0	0	0	FBGN0085450	Snoo	5740414	FBgn0085450	Snoo	Human	6497	10896	SKI	7	6.84	high	Yes	Yes	eggNOG, OrthoFinder, OrthoInspector, orthoMCL, Panther, Phylome, RoundUp	rs4648819	atrioventricular_electrical_activity	van_Setten_et_al_2018
25	303	FBgn0085450	Snoo	FastLMM	0	1	1	0	0	0	0	FBGN0085450	Snoo	5740414	FBgn0085450	Snoo	Human	6497	10896	SKI	7	6.84	high	Yes	Yes	eggNOG, OrthoFinder, OrthoInspector, orthoMCL, Panther, Phylome, RoundUp	rs2503715	ECG_traits_and_atrial_fibrilation	Verweij_et_al_2020
26	310	FBgn0265045	Strn-Mlck	FastLMM	0	0	0	0	1	0	0	FBGN0265045	Strn-Mlck	36753	FBgn0265045	Strn-Mlck	Human	4638	7590	MYLK	4	3.89	high	Yes	Yes	eggNOG, OrthoFinder, RoundUp, TreeFam	rs1254386	ECG_traits_and_atrial_fibrilation	Verweij_et_al_2020
27	312	FBgn0261090	Sytbeta	FastLMM	0	0	1	0	0	0	0	FBGN0261090	Sytbeta	39630	FBgn0261090	Sytbeta	Human	341359	19266	SYT10	5	4.97	high	Yes	Yes	eggNOG, OrthoDB, OrthoFinder, Panther, TreeFam	rs7980799	Resting_heart_rate	den_Hoed_et_al_2013
28	312	FBgn0261090	Sytbeta	FastLMM	0	0	1	0	0	0	0	FBGN0261090	Sytbeta	39630	FBgn0261090	Sytbeta	Human	341359	19266	SYT10	5	4.97	high	Yes	Yes	eggNOG, OrthoDB, OrthoFinder, Panther, TreeFam	rs7315695	ECG_traits_and_atrial_fibrilation	Verweij_et_al_2020
29	347	FBgn0034554	CG15227	FastEpistasis	0	1	0	0	0	0	0	FBGN0034554	CG15227	37359	FBgn0034554	CAH14	Human	767	1382	CA8	3	2.93	high	Yes	Yes	Compara, eggNOG, Panther	rs6995588	Cardiac_hypertrophy	Parsa_et_al_2011
30	348	FBgn0013995	Calx	FastEpistasis	0	1	0	0	0	0	0	FBGN0013995	Calx	42481	FBgn0013995	Calx	Human	6546	11068	SLC8A1	13	12.82	high	Yes	Yes	eggNOG, Hieranoid, Inparanoid, Isobase, OMA, OrthoDB, OrthoFinder, OrthoInspector, orthoMCL, Panther, Phylome, RoundUp, TreeFam	rs12997023	myocardial_repolarization	Arking_et_al_2014
31	348	FBgn0013995	Calx	FastEpistasis	0	1	0	0	0	0	0	FBGN0013995	Calx	42481	FBgn0013995	Calx	Human	6546	11068	SLC8A1	13	12.82	high	Yes	Yes	eggNOG, Hieranoid, Inparanoid, Isobase, OMA, OrthoDB, OrthoFinder, OrthoInspector, orthoMCL, Panther, Phylome, RoundUp, TreeFam	rs13026826	ECG_traits_and_atrial_fibrilation	Verweij_et_al_2020
32	400	FBgn0261555	CG42673	FastEpistasis	0	0	0	1	0	0	0	FBGN0261555	CG42673	39111	FBgn0261555	CG42673	Human	9722	16859	NOS1AP	10	9.96	high	Yes	Yes	eggNOG, Hieranoid, Inparanoid, OMA, OrthoFinder, OrthoInspector, Panther, Phylome, RoundUp, TreeFam	rs12143842	myocardial_repolarization	Arking_et_al_2014
33	400	FBgn0261555	CG42673	FastEpistasis	0	0	0	1	0	0	0	FBGN0261555	CG42673	39111	FBgn0261555	CG42673	Human	9722	16859	NOS1AP	10	9.96	high	Yes	Yes	eggNOG, Hieranoid, Inparanoid, OMA, OrthoFinder, OrthoInspector, Panther, Phylome, RoundUp, TreeFam	rs12143842	ECG_traits_and_atrial_fibrilation	Verweij_et_al_2020
34	400	FBgn0261555	CG42673	FastEpistasis	0	0	0	1	0	0	0	FBGN0261555	CG42673	39111	FBgn0261555	CG42673	Human	9722	16859	NOS1AP	10	9.96	high	Yes	Yes	eggNOG, Hieranoid, Inparanoid, OMA, OrthoFinder, OrthoInspector, Panther, Phylome, RoundUp, TreeFam	rs59852339	ECG_traits_and_atrial_fibrilation	Verweij_et_al_2020
35	400	FBgn0261555	CG42673	FastEpistasis	0	0	0	1	0	0	0	FBGN0261555	CG42673	39111	FBgn0261555	CG42673	Human	9722	16859	NOS1AP	10	9.96	high	Yes	Yes	eggNOG, Hieranoid, Inparanoid, OMA, OrthoFinder, OrthoInspector, Panther, Phylome, RoundUp, TreeFam	rs116381680	ECG_traits_and_atrial_fibrilation	Verweij_et_al_2020
36	488	FBgn0264695	Mhc	FastEpistasis	0	1	0	0	0	0	0	FBGN0264695	Mhc	35007	FBgn0264695	Mhc	Human	4625	7577	MYH7	12	11.86	high	Yes	Yes	eggNOG, Hieranoid, Homologene, Inparanoid, OMA, OrthoFinder, OrthoInspector, orthoMCL, Panther, Phylome, RoundUp, TreeFam	rs28631169	atrial_fibrilation	Roseli_et_al_2018
37	488	FBgn0264695	Mhc	FastEpistasis	0	1	0	0	0	0	0	FBGN0264695	Mhc	35007	FBgn0264695	Mhc	Human	4625	7577	MYH7	12	11.86	high	Yes	Yes	eggNOG, Hieranoid, Homologene, Inparanoid, OMA, OrthoFinder, OrthoInspector, orthoMCL, Panther, Phylome, RoundUp, TreeFam	rs422068	atrial_fibrillation	Nielsen_et_al_2018
38	488	FBgn0264695	Mhc	FastEpistasis	0	1	0	0	0	0	0	FBGN0264695	Mhc	35007	FBgn0264695	Mhc	Human	4625	7577	MYH7	12	11.86	high	Yes	Yes	eggNOG, Hieranoid, Homologene, Inparanoid, OMA, OrthoFinder, OrthoInspector, orthoMCL, Panther, Phylome, RoundUp, TreeFam	rs365990	ECG_traits_and_atrial_fibrilation	Verweij_et_al_2020
39	495	FBgn0261617	nej	FastEpistasis	0	1	0	0	0	0	0	FBGN0261617	nej	43856	FBgn0261617	nej	Human	1387	2348	CREBBP	12	11.79	high	Yes	Yes	Compara, eggNOG, Hieranoid, Inparanoid, OMA, OrthoFinder, OrthoInspector, orthoMCL, Panther, Phylome, RoundUp, TreeFam	rs1296720	myocardial_repolarization	Arking_et_al_2014
40	509	FBgn0003091	Pkc53E	FastEpistasis	1	0	0	0	0	0	0	FBGN0003091	Pkc53E	48311	FBgn0003091	Pkc53E	Human	5578	9393	PRKCA	15	14.75	high	Yes	Yes	Compara, eggNOG, Hieranoid, Homologene, Inparanoid, Isobase, OMA, OrthoDB, OrthoFinder, OrthoInspector, orthoMCL, Panther, Phylome, RoundUp, TreeFam	rs9892651	myocardial_repolarization	Arking_et_al_2014
41	509	FBgn0003091	Pkc53E	FastEpistasis	1	0	0	0	0	0	0	FBGN0003091	Pkc53E	48311	FBgn0003091	Pkc53E	Human	5578	9393	PRKCA	15	14.75	high	Yes	Yes	Compara, eggNOG, Hieranoid, Homologene, Inparanoid, Isobase, OMA, OrthoDB, OrthoFinder, OrthoInspector, orthoMCL, Panther, Phylome, RoundUp, TreeFam	rs9912468	QRS_duration	Sotoodehnia_et_al_2010
42	509	FBgn0003091	Pkc53E	FastEpistasis	1	0	0	0	0	0	0	FBGN0003091	Pkc53E	48311	FBgn0003091	Pkc53E	Human	5578	9393	PRKCA	15	14.75	high	Yes	Yes	Compara, eggNOG, Hieranoid, Homologene, Inparanoid, Isobase, OMA, OrthoDB, OrthoFinder, OrthoInspector, orthoMCL, Panther, Phylome, RoundUp, TreeFam	rs9912468	Electrocardiographic_QRS_traits	van_der_Hast_et_al_2016
43	509	FBgn0003091	Pkc53E	FastEpistasis	1	0	0	0	0	0	0	FBGN0003091	Pkc53E	48311	FBgn0003091	Pkc53E	Human	5578	9393	PRKCA	15	14.75	high	Yes	Yes	Compara, eggNOG, Hieranoid, Homologene, Inparanoid, Isobase, OMA, OrthoDB, OrthoFinder, OrthoInspector, orthoMCL, Panther, Phylome, RoundUp, TreeFam	rs9909004	ECG_traits_and_atrial_fibrilation	Verweij_et_al_2020
44	528	FBgn0263873	sick	FastEpistasis	0	0	0	1	0	0	0	FBGN0263873	sick	35277	FBgn0263873	sick	Human	89797	15997	NAV2	9	8.94	high	Yes	Yes	eggNOG, Hieranoid, Inparanoid, Isobase, OrthoFinder, OrthoInspector, Panther, Phylome, RoundUp	rs1822273	atrial_fibrilation	Roseli_et_al_2018
45	528	FBgn0263873	sick	FastEpistasis	0	0	0	1	0	0	0	FBGN0263873	sick	35277	FBgn0263873	sick	Human	89797	15997	NAV2	9	8.94	high	Yes	Yes	eggNOG, Hieranoid, Inparanoid, Isobase, OrthoFinder, OrthoInspector, Panther, Phylome, RoundUp	rs1372797	atrioventricular_electrical_activity	van_Setten_et_al_2018
46	528	FBgn0263873	sick	FastEpistasis	0	0	0	1	0	0	0	FBGN0263873	sick	35277	FBgn0263873	sick	Human	89797	15997	NAV2	9	8.94	high	Yes	Yes	eggNOG, Hieranoid, Inparanoid, Isobase, OrthoFinder, OrthoInspector, Panther, Phylome, RoundUp	rs10741807	atrial_fibrillation	Nielsen_et_al_2018
47	528	FBgn0263873	sick	FastEpistasis	0	0	0	1	0	0	0	FBGN0263873	sick	35277	FBgn0263873	sick	Human	89797	15997	NAV2	9	8.94	high	Yes	Yes	eggNOG, Hieranoid, Inparanoid, Isobase, OrthoFinder, OrthoInspector, Panther, Phylome, RoundUp	rs2625322	ECG_traits_and_atrial_fibrilation	Verweij_et_al_2020
48	548	FBgn0284408	trol	FastEpistasis	0	0	1	0	0	0	0	FBGN0284408	trol	45320	FBgn0284408	trol	Human	3339	5273	HSPG2	11	10.65	high	Yes	Yes	Compara, eggNOG, Hieranoid, OMA, OrthoDB, OrthoFinder, OrthoInspector, orthoMCL, Phylome, RoundUp, TreeFam	rs7529220	atrial_fibrillation	Nielsen_et_al_2018
49	561	FBgn0028516	ZnT35C	FastEpistasis	1	0	0	0	0	0	0	FBGN0028516	ZnT35C	34890	FBgn0028516	ZnT35C	Human	7780	11013	SLC30A2	11	10.87	high	Yes	Yes	eggNOG, Homologene, Inparanoid, OMA, OrthoDB, OrthoFinder, orthoMCL, Panther, Phylome, RoundUp, TreeFam	rs61775418	ECG_traits_and_atrial_fibrilation	Verweij_et_al_2020
50	562	FBgn0052311	zormin	FastEpistasis	0	0	0	0	0	0	1	FBGN0052311	zormin	2769001	FBgn0052311	zormin	Human	23022	17068	PALLD	2	1.91	high	Yes	Yes	OrthoFinder, Phylome	rs2062591	ECG_traits_and_atrial_fibrilation	Verweij_et_al_2020
51	562	FBgn0052311	zormin	FastEpistasis	0	0	0	0	0	0	1	FBGN0052311	zormin	2769001	FBgn0052311	zormin	Human	84665	23246	MYPN	2	1.91	high	Yes	Yes	OrthoFinder, Phylome	rs7096385	atrial_fibrillation	Nielsen_et_al_2018
52	562	FBgn0052311	zormin	FastEpistasis	0	0	0	0	0	0	1	FBGN0052311	zormin	2769001	FBgn0052311	zormin	Human	285025	26821	CCDC141	2	1.81	high	Yes	Yes	eggNOG, Phylome	rs7561149	myocardial_repolarization	Arking_et_al_2014
53	562	FBgn0052311	zormin	FastEpistasis	0	0	0	0	0	0	1	FBGN0052311	zormin	2769001	FBgn0052311	zormin	Human	285025	26821	CCDC141	2	1.81	high	Yes	Yes	eggNOG, Phylome	rs17362588	Resting_heart_rate	den_Hoed_et_al_2013
54	562	FBgn0052311	zormin	FastEpistasis	0	0	0	0	0	0	1	FBGN0052311	zormin	2769001	FBgn0052311	zormin	Human	285025	26821	CCDC141	2	1.81	high	Yes	Yes	eggNOG, Phylome	rs16866397	ECG_traits_and_atrial_fibrilation	Verweij_et_al_2020
55	562	FBgn0052311	zormin	FastEpistasis	0	0	0	0	0	0	1	FBGN0052311	zormin	2769001	FBgn0052311	zormin	Human	285025	26821	CCDC141	2	1.81	high	Yes	Yes	eggNOG, Phylome	rs955738	ECG_traits_and_atrial_fibrilation	Verweij_et_al_2020
56	17	FBgn0267033	mamo	FastLMM_FastEpistasis	0	0	1	1	0	1	0	FBGN0267033	mamo	32353	FBgn0267033	mamo	Human	6670	11208	SP3	1	1.03	low	Yes	No	RoundUp	rs938291	myocardial_repolarization	Arking_et_al_2014
57	35	FBgn0260941	app	FastLMM	1	0	0	0	0	0	0	FBGN0260941	app	39399	FBgn0260941	app	Human	25921	18472	ZDHHC5	3	2.94	low	No	No	eggNOG, OrthoDB, RoundUp	rs7479922	ECG_traits_and_atrial_fibrilation	Verweij_et_al_2020
58	47	FBgn0264001	bru-3	FastLMM	0	1	0	0	0	0	0	FBGN0264001	bru3	39527	FBgn0264001	bru3	Human	10658	2549	CELF1	3	2.81	low	No	No	eggNOG, OrthoDB, orthoMCL	rs3729989	ECG_traits_and_atrial_fibrilation	Verweij_et_al_2020
59	50	FBgn0266756	btsz	FastLMM	0	1	0	0	0	0	0	FBGN0266756	btsz	3346167	FBgn0266756	btsz	Human	341359	19266	SYT10	2	1.91	low	No	No	eggNOG, OrthoDB	rs7980799	Resting_heart_rate	den_Hoed_et_al_2013
60	50	FBgn0266756	btsz	FastLMM	0	1	0	0	0	0	0	FBGN0266756	btsz	3346167	FBgn0266756	btsz	Human	341359	19266	SYT10	2	1.91	low	No	No	eggNOG, OrthoDB	rs7315695	ECG_traits_and_atrial_fibrilation	Verweij_et_al_2020
61	96	FBgn0034568	CG3216	FastLMM	0	0	0	0	1	0	0	FBGN0034568	CG3216	37376	FBgn0034568	CG3216	Human	4883	7945	NPR3	2	1.85	low	No	No	eggNOG, Isobase	rs3828591	ECG_traits_and_atrial_fibrilation	Verweij_et_al_2020
62	125	FBgn0285963	sda	FastLMM	0	0	1	0	0	0	0	FBGN0285963	CG46339	44359	FBgn0285963	CG46339	Human	290	500	ANPEP	3	2.84	low	No	No	Compara, eggNOG, OrthoDB	rs28513927	ECG_traits_and_atrial_fibrilation	Verweij_et_al_2020
63	131	FBgn0036186	CG6071	FastLMM	0	0	1	0	0	0	0	FBGN0036186	CG6071	39308	FBgn0036186	CG6071	Human	290	500	ANPEP	3	2.84	low	No	No	Compara, eggNOG, OrthoDB	rs28513927	ECG_traits_and_atrial_fibrilation	Verweij_et_al_2020
64	137	FBgn0030991	CG7453	FastLMM	0	0	0	0	0	0	1	FBGN0030991	CG7453	32903	FBgn0030991	CG7453	Human	100287284	40023	MANSC4	1	1.1	low	Yes	Yes	Panther	rs11049136	ECG_traits_and_atrial_fibrilation	Verweij_et_al_2020
65	178	FBgn0053196	dp	FastLMM	0	0	0	0	0	1	0	FBGN0053196	dpy	318824	FBgn0053196	dpy	Human	4054	6716	LTBP3	2	2.01	low	No	No	OrthoDB, OrthoInspector	rs36085849	ECG_traits_and_atrial_fibrilation	Verweij_et_al_2020
66	194	FBgn0031815	frj	FastLMM	0	1	0	0	0	0	0	FBGN0031815	frj	33900	FBgn0031815	frj	Human	154141	21579	MBOAT1	2	1.91	low	No	No	eggNOG, OrthoDB	rs78144291	ECG_traits_and_atrial_fibrilation	Verweij_et_al_2020
67	204	FBgn0264000	GluRIB	FastLMM	0	0	0	0	0	1	0	FBGN0264000	GluRIB	44484	FBgn0264000	GluRIB	Human	2898	4580	GRIK2	2	1.83	low	No	No	Compara, eggNOG	rs4520040	Cardiac_hypertrophy	Parsa_et_al_2011
68	204	FBgn0264000	GluRIB	FastLMM	0	0	0	0	0	1	0	FBGN0264000	GluRIB	44484	FBgn0264000	GluRIB	Human	2894	4575	GRID1	2	1.83	low	No	No	Compara, eggNOG	rs7910620	Echocardiographic_Traits	Vasan_et_al_2009
69	205	FBgn0046113	GluRIIC	FastLMM	0	0	0	0	1	0	0	FBGN0046113	GluRIIC	33275	FBgn0046113	GluRIIC	Human	2894	4575	GRID1	3	2.93	low	No	No	Compara, eggNOG, Panther	rs7910620	Echocardiographic_Traits	Vasan_et_al_2009
70	212	FBgn0259683	Ir40a	FastLMM	0	0	0	0	1	0	0	FBGN0259683	Ir40a	35449	FBgn0259683	Ir40a	Human	2898	4580	GRIK2	1	0.93	low	Yes	No	Compara	rs4520040	Cardiac_hypertrophy	Parsa_et_al_2011
71	212	FBgn0259683	Ir40a	FastLMM	0	0	0	0	1	0	0	FBGN0259683	Ir40a	35449	FBgn0259683	Ir40a	Human	2894	4575	GRID1	1	0.93	low	Yes	No	Compara	rs7910620	Echocardiographic_Traits	Vasan_et_al_2009
72	236	FBgn0026206	mei-P26	FastLMM	0	0	1	0	0	0	0	FBGN0026206	mei-P26	45775	FBgn0026206	mei-P26	Human	23321	15974	TRIM2	2	1.97	low	No	No	OrthoDB, TreeFam	rs6846721	ECG_traits_and_atrial_fibrilation	Verweij_et_al_2020
73	259	FBgn0083963	CG34127	FastLMM	0	0	1	0	0	0	0	FBGN0083963	Nlg3	40912	FBgn0083963	Nlg3	Human	43	108	ACHE	2	1.91	low	No	No	eggNOG, OrthoDB	rsl3245899	Resting_heart_rate	den_Hoed_et_al_2013
74	259	FBgn0083963	CG34127	FastLMM	0	0	1	0	0	0	0	FBGN0083963	Nlg3	40912	FBgn0083963	Nlg3	Human	43	108	ACHE	2	1.91	low	No	No	eggNOG, OrthoDB	rs13245899	ECG_traits_and_atrial_fibrilation	Verweij_et_al_2020
75	260	FBgn0083975	CG34139	FastLMM	0	0	0	1	0	0	0	FBGN0083975	Nlg4	42402	FBgn0083975	Nlg4	Human	43	108	ACHE	2	1.91	low	No	No	eggNOG, OrthoDB	rsl3245899	Resting_heart_rate	den_Hoed_et_al_2013
76	260	FBgn0083975	CG34139	FastLMM	0	0	0	1	0	0	0	FBGN0083975	Nlg4	42402	FBgn0083975	Nlg4	Human	43	108	ACHE	2	1.91	low	No	No	eggNOG, OrthoDB	rs13245899	ECG_traits_and_atrial_fibrilation	Verweij_et_al_2020
77	267	FBgn0037153	olf413	FastLMM	0	0	0	0	0	1	0	FBGN0037153	olf413	40453	FBgn0037153	olf413	Human	1621	2689	DBH	2	1.91	low	No	No	eggNOG, OrthoDB	rs12001868	ECG_traits_and_atrial_fibrilation	Verweij_et_al_2020
78	307	FBgn0036411	Sox21a	FastLMM	0	0	1	0	0	0	0	FBGN0036411	Sox21a	39567	FBgn0036411	Sox21a	Human	6660	11201	SOX5	2	1.83	low	No	No	Compara, eggNOG	rs17287293	atrioventricular_electrical_activity	van_Setten_et_al_2018
79	310	FBgn0265045	Strn-Mlck	FastLMM	0	0	0	0	1	0	0	FBGN0265045	Strn-Mlck	36753	FBgn0265045	Strn-Mlck	Human	84033	15719	OBSCN	2	1.81	low	No	No	eggNOG, Phylome	rs397637	atrioventricular_electrical_activity	van_Setten_et_al_2018
80	310	FBgn0265045	Strn-Mlck	FastLMM	0	0	0	0	1	0	0	FBGN0265045	Strn-Mlck	36753	FBgn0265045	Strn-Mlck	Human	84033	15719	OBSCN	2	1.81	low	No	No	eggNOG, Phylome	rs35937215	ECG_traits_and_atrial_fibrilation	Verweij_et_al_2020
81	319	FBgn0262139	trh	FastLMM	0	0	0	0	1	0	0	FBGN0262139	trh	38065	FBgn0262139	trh	Human	2034	3374	EPAS1	2	1.83	low	No	No	Compara, eggNOG	rs2121266	ECG_traits_and_atrial_fibrilation	Verweij_et_al_2020
82	324	FBgn0003944	Ubx	FastLMM	0	0	1	0	0	0	0	FBGN0003944	Ubx	42034	FBgn0003944	Ubx	Human	3223	5128	HOXC6	2	2	low	No	No	eggNOG, Panther	rs736825	Electrocardiographic_QRS_traits	van_der_Hast_et_al_2016
83	324	FBgn0003944	Ubx	FastLMM	0	0	1	0	0	0	0	FBGN0003944	Ubx	42034	FBgn0003944	Ubx	Human	3222	5127	HOXC5	2	2	low	No	No	eggNOG, Panther	rs736825	Electrocardiographic_QRS_traits	van_der_Hast_et_al_2016
84	351	FBgn0031568	CG10019	FastEpistasis	0	1	0	0	0	0	0	FBGN0031568	CG10019	33600	FBgn0031568	CG10019	Human	387700	23094	SLC16A12	3	2.91	low	No	No	eggNOG, OrthoDB, OrthoFinder	rs117524646	ECG_traits_and_atrial_fibrilation	Verweij_et_al_2020
85	407	FBgn0263846	CG43707	FastEpistasis	0	0	0	0	0	1	0	FBGN0263846	CG43707	33601	FBgn0263846	CG43707	Human	10256	19700	CNKSR1	1	1.03	low	Yes	No	RoundUp	rs61775418	ECG_traits_and_atrial_fibrilation	Verweij_et_al_2020
86	407	FBgn0263846	CG43707	FastEpistasis	0	0	0	0	0	1	0	FBGN0263846	CG43707	33601	FBgn0263846	CG43707	Human	57120	17643	GOPC	1	0.9	low	Yes	Yes	eggNOG	rs663474	ECG_traits_and_atrial_fibrilation	Verweij_et_al_2020
87	408	FBgn0265002	CG44153	FastEpistasis	0	0	1	0	1	1	1	FBGN0265002	CG44153	34341	FBgn0265002	CG44153	Human	23022	17068	PALLD	1	1.1	low	Yes	No	Panther	rs2062591	ECG_traits_and_atrial_fibrilation	Verweij_et_al_2020
88	408	FBgn0265002	CG44153	FastEpistasis	0	0	1	0	1	1	1	FBGN0265002	CG44153	34341	FBgn0265002	CG44153	Human	84665	23246	MYPN	1	1.1	low	Yes	No	Panther	rs7096385	atrial_fibrillation	Nielsen_et_al_2018
89	424	FBgn0005775	Con	FastEpistasis	0	0	0	0	1	0	0	FBGN0005775	Con	38590	FBgn0005775	Con	Human	8549	4504	LGR5	1	0.93	low	Yes	No	Compara	rs1149003	ECG_traits_and_atrial_fibrilation	Verweij_et_al_2020
90	424	FBgn0005775	Con	FastEpistasis	0	0	0	0	1	0	0	FBGN0005775	Con	38590	FBgn0005775	Con	Human	121227	30991	LRIG3	1	0.93	low	Yes	No	Compara	rs11172782	HF	Smith_et_al_2010
91	430	FBgn0031461	daw	FastEpistasis	0	1	0	0	0	0	0	FBGN0031461	daw	33474	FBgn0031461	daw	Human	650	1069	BMP2	2	2	low	No	No	eggNOG, Panther	rs2145274	atrial_fibrilation	Roseli_et_al_2018
92	430	FBgn0031461	daw	FastEpistasis	0	1	0	0	0	0	0	FBGN0031461	daw	33474	FBgn0031461	daw	Human	650	1069	BMP2	2	2	low	No	No	eggNOG, Panther	rs3929778	Electrocardiographic_QRS_traits	van_der_Hast_et_al_2016
93	430	FBgn0031461	daw	FastEpistasis	0	1	0	0	0	0	0	FBGN0031461	daw	33474	FBgn0031461	daw	Human	650	1069	BMP2	2	2	low	No	No	eggNOG, Panther	rs11699612	ECG_traits_and_atrial_fibrilation	Verweij_et_al_2020
94	432	FBgn0013810	Dhc36C	FastEpistasis	0	0	1	0	0	0	0	FBGN0013810	Dhc36C	35061	FBgn0013810	Dhc36C	Human	196385	2941	DNAH10	3	2.8	low	No	No	eggNOG, OrthoFinder, orthoMCL	rs12298484	atrial_fibrilation	Roseli_et_al_2018
95	444	FBgn0011589	elk	FastEpistasis	0	0	0	0	0	1	0	FBGN0011589	Elk	37047	FBgn0011589	Elk	Human	3757	6251	KCNH2	3	2.84	low	No	No	Compara, eggNOG, OrthoDB	rs7789146	atrial_fibrilation	Roseli_et_al_2018
96	444	FBgn0011589	elk	FastEpistasis	0	0	0	0	0	1	0	FBGN0011589	Elk	37047	FBgn0011589	Elk	Human	3757	6251	KCNH2	3	2.84	low	No	No	Compara, eggNOG, OrthoDB	rs2072413	myocardial_repolarization	Arking_et_al_2014
97	444	FBgn0011589	elk	FastEpistasis	0	0	0	0	0	1	0	FBGN0011589	Elk	37047	FBgn0011589	Elk	Human	3757	6251	KCNH2	3	2.84	low	No	No	Compara, eggNOG, OrthoDB	rs7789146	atrial_fibrillation	Nielsen_et_al_2018
98	444	FBgn0011589	elk	FastEpistasis	0	0	0	0	0	1	0	FBGN0011589	Elk	37047	FBgn0011589	Elk	Human	3757	6251	KCNH2	3	2.84	low	No	No	Compara, eggNOG, OrthoDB	rs55851300	ECG_traits_and_atrial_fibrilation	Verweij_et_al_2020
99	444	FBgn0011589	elk	FastEpistasis	0	0	0	0	0	1	0	FBGN0011589	Elk	37047	FBgn0011589	Elk	Human	10021	16882	HCN4	2	1.83	low	No	No	Compara, eggNOG	rs74022964	atrial_fibrilation	Roseli_et_al_2018
100	444	FBgn0011589	elk	FastEpistasis	0	0	0	0	0	1	0	FBGN0011589	Elk	37047	FBgn0011589	Elk	Human	10021	16882	HCN4	2	1.83	low	No	No	Compara, eggNOG	rs4489968	Resting_heart_rate	den_Hoed_et_al_2013
101	444	FBgn0011589	elk	FastEpistasis	0	0	0	0	0	1	0	FBGN0011589	Elk	37047	FBgn0011589	Elk	Human	10021	16882	HCN4	2	1.83	low	No	No	Compara, eggNOG	rs74022964	atrial_fibrillation	Nielsen_et_al_2018
102	444	FBgn0011589	elk	FastEpistasis	0	0	0	0	0	1	0	FBGN0011589	Elk	37047	FBgn0011589	Elk	Human	10021	16882	HCN4	2	1.83	low	No	No	Compara, eggNOG	rs7164883	ECG_traits_and_atrial_fibrilation	Verweij_et_al_2020
103	484	FBgn0040765	luna	FastEpistasis	1	0	1	1	0	0	0	FBGN0040765	luna	2768719	FBgn0040765	luna	Human	11278	6346	KLF12	2	2.03	low	No	No	Compara, Panther	rs728926	myocardial_repolarization	Arking_et_al_2014
104	484	FBgn0040765	luna	FastEpistasis	1	0	1	1	0	0	0	FBGN0040765	luna	2768719	FBgn0040765	luna	Human	11278	6346	KLF12	2	2.03	low	No	No	Compara, Panther	rs1886512	QRS_duration	Sotoodehnia_et_al_2010
105	484	FBgn0040765	luna	FastEpistasis	1	0	1	1	0	0	0	FBGN0040765	luna	2768719	FBgn0040765	luna	Human	11278	6346	KLF12	2	2.03	low	No	No	Compara, Panther	rs728926	Electrocardiographic_QRS_traits	van_der_Hast_et_al_2016
106	484	FBgn0040765	luna	FastEpistasis	1	0	1	1	0	0	0	FBGN0040765	luna	2768719	FBgn0040765	luna	Human	11278	6346	KLF12	2	2.03	low	No	No	Compara, Panther	rs1886512	ECG_traits_and_atrial_fibrilation	Verweij_et_al_2020
107	488	FBgn0264695	Mhc	FastEpistasis	0	1	0	0	0	0	0	FBGN0264695	Mhc	35007	FBgn0264695	Mhc	Human	4629	7569	MYH11	3	2.8	low	No	No	eggNOG, OrthoFinder, orthoMCL	rs3915499	Resting_heart_rate	Eppinga_et_al_2016
108	488	FBgn0264695	Mhc	FastEpistasis	0	1	0	0	0	0	0	FBGN0264695	Mhc	35007	FBgn0264695	Mhc	Human	4629	7569	MYH11	3	2.8	low	No	No	eggNOG, OrthoFinder, orthoMCL	rs3915425	ECG_traits_and_atrial_fibrilation	Verweij_et_al_2020
109	492	FBgn0266347	nAcRalpha-80B	FastEpistasis	0	0	1	0	0	0	0	FBGN0266347	nAChRalpha4	40521	FBgn0266347	nAChRalpha4	Human	1134	1955	CHRNA1	3	3.01	low	No	No	eggNOG, OrthoDB, Panther	rs56181519	atrial_fibrilation	Roseli_et_al_2018
110	499	FBgn0262509	nrm	FastEpistasis	0	1	0	0	0	0	0	FBGN0262509	nrm	40515	FBgn0262509	nrm	Human	84033	15719	OBSCN	1	1.1	low	Yes	No	Panther	rs397637	atrioventricular_electrical_activity	van_Setten_et_al_2018
111	499	FBgn0262509	nrm	FastEpistasis	0	1	0	0	0	0	0	FBGN0262509	nrm	40515	FBgn0262509	nrm	Human	84033	15719	OBSCN	1	1.1	low	Yes	No	Panther	rs35937215	ECG_traits_and_atrial_fibrilation	Verweij_et_al_2020
112	509	FBgn0003091	Pkc53E	FastEpistasis	1	0	0	0	0	0	0	FBGN0003091	Pkc53E	48311	FBgn0003091	Pkc53E	Human	5580	9399	PRKCD	2	2.03	low	No	No	OrthoFinder, RoundUp	rs4687718	QRS_duration	Sotoodehnia_et_al_2010
113	509	FBgn0003091	Pkc53E	FastEpistasis	1	0	0	0	0	0	0	FBGN0003091	Pkc53E	48311	FBgn0003091	Pkc53E	Human	6446	10810	SGK1	2	2.01	low	No	No	OrthoDB, OrthoFinder	rs573680085	ECG_traits_and_atrial_fibrilation	Verweij_et_al_2020
114	510	FBgn0003093	Pkc98E	FastEpistasis	0	0	1	0	0	0	0	FBGN0003093	Pkc98E	43428	FBgn0003093	Pkc98E	Human	5578	9393	PRKCA	2	2.03	low	No	No	OrthoFinder, RoundUp	rs9892651	myocardial_repolarization	Arking_et_al_2014
115	510	FBgn0003093	Pkc98E	FastEpistasis	0	0	1	0	0	0	0	FBGN0003093	Pkc98E	43428	FBgn0003093	Pkc98E	Human	5578	9393	PRKCA	2	2.03	low	No	No	OrthoFinder, RoundUp	rs9912468	QRS_duration	Sotoodehnia_et_al_2010
116	510	FBgn0003093	Pkc98E	FastEpistasis	0	0	1	0	0	0	0	FBGN0003093	Pkc98E	43428	FBgn0003093	Pkc98E	Human	5578	9393	PRKCA	2	2.03	low	No	No	OrthoFinder, RoundUp	rs9912468	Electrocardiographic_QRS_traits	van_der_Hast_et_al_2016
117	510	FBgn0003093	Pkc98E	FastEpistasis	0	0	1	0	0	0	0	FBGN0003093	Pkc98E	43428	FBgn0003093	Pkc98E	Human	5578	9393	PRKCA	2	2.03	low	No	No	OrthoFinder, RoundUp	rs9909004	ECG_traits_and_atrial_fibrilation	Verweij_et_al_2020
118	527	FBgn0003386	Shaw	FastEpistasis	0	0	0	0	1	0	0	FBGN0003386	Shaw	33599	FBgn0003386	Shaw	Human	3743	6226	KCNA7	2	1.91	low	No	No	eggNOG, OrthoDB	rs35828463	ECG_traits_and_atrial_fibrilation	Verweij_et_al_2020
119	533	FBgn0086906	sls	FastEpistasis	0	0	1	0	0	0	0	FBGN0086906	sls	44013	FBgn0086906	sls	Human	7273	12403	TTN	2	1.8	low	No	No	eggNOG, orthoMCL	rs35504893	atrial_fibrilation	Roseli_et_al_2018
120	533	FBgn0086906	sls	FastEpistasis	0	0	1	0	0	0	0	FBGN0086906	sls	44013	FBgn0086906	sls	Human	7273	12403	TTN	2	1.8	low	No	No	eggNOG, orthoMCL	rs922984	atrioventricular_electrical_activity	van_Setten_et_al_2018
121	533	FBgn0086906	sls	FastEpistasis	0	0	1	0	0	0	0	FBGN0086906	sls	44013	FBgn0086906	sls	Human	7273	12403	TTN	2	1.8	low	No	No	eggNOG, orthoMCL	rs7561149	myocardial_repolarization	Arking_et_al_2014
122	533	FBgn0086906	sls	FastEpistasis	0	0	1	0	0	0	0	FBGN0086906	sls	44013	FBgn0086906	sls	Human	7273	12403	TTN	2	1.8	low	No	No	eggNOG, orthoMCL	rs3816849	Electrocardiographic_QRS_traits	van_der_Hast_et_al_2016
123	533	FBgn0086906	sls	FastEpistasis	0	0	1	0	0	0	0	FBGN0086906	sls	44013	FBgn0086906	sls	Human	7273	12403	TTN	2	1.8	low	No	No	eggNOG, orthoMCL	rs2288327	atrial_fibrillation	Nielsen_et_al_2018
124	533	FBgn0086906	sls	FastEpistasis	0	0	1	0	0	0	0	FBGN0086906	sls	44013	FBgn0086906	sls	Human	7273	12403	TTN	2	1.8	low	No	No	eggNOG, orthoMCL	rs16866397	ECG_traits_and_atrial_fibrilation	Verweij_et_al_2020
125	533	FBgn0086906	sls	FastEpistasis	0	0	1	0	0	0	0	FBGN0086906	sls	44013	FBgn0086906	sls	Human	7273	12403	TTN	2	1.8	low	No	No	eggNOG, orthoMCL	rs955738	ECG_traits_and_atrial_fibrilation	Verweij_et_al_2020
126	533	FBgn0086906	sls	FastEpistasis	0	0	1	0	0	0	0	FBGN0086906	sls	44013	FBgn0086906	sls	Human	10290	16901	SPEG	2	1.8	low	No	No	eggNOG, orthoMCL	rs907683	Resting_heart_rate	Eppinga_et_al_2016
127	533	FBgn0086906	sls	FastEpistasis	0	0	1	0	0	0	0	FBGN0086906	sls	44013	FBgn0086906	sls	Human	10290	16901	SPEG	2	1.8	low	No	No	eggNOG, orthoMCL	rs907683	ECG_traits_and_atrial_fibrilation	Verweij_et_al_2020
128	537	FBgn0042630	Sox21b	FastEpistasis	0	1	0	0	0	0	0	FBGN0042630	Sox21b	39569	FBgn0042630	Sox21b	Human	6665	11196	SOX15	3	3	low	No	No	eggNOG, OrthoFinder, Panther	rs9899183	atrial_fibrillation	Nielsen_et_al_2018
129	543	FBgn0033652	ths	FastEpistasis	0	0	1	0	0	0	0	FBGN0033652	ths	36258	FBgn0033652	ths	Human	2250	3683	FGF5	1	0.9	low	Yes	No	eggNOG	rs1458038	atrial_fibrillation	Nielsen_et_al_2018
130	543	FBgn0033652	ths	FastEpistasis	0	0	1	0	0	0	0	FBGN0033652	ths	36258	FBgn0033652	ths	Human	2246	3665	FGF1	1	0.9	low	Yes	No	eggNOG	rs152528	Cardiac_hypertrophy	Parsa_et_al_2011
131	544	FBgn0039257	tnc	FastEpistasis	0	0	1	0	0	0	0	FBGN0039257	tnc	42990	FBgn0039257	tnc	Human	254102	30682	EHBP1L1	1	0.91	low	Yes	No	Phylome	rs36085849	ECG_traits_and_atrial_fibrilation	Verweij_et_al_2020
132	4	FBgn0259176	bun	FastLMM_FastEpistasis	0	0	0	0	0	1	0	FBGN0259176	bun	34665	FBgn0259176	bun	Human	9819	29095	TSC22D2	7	6.85	moderate	No	Yes	Compara, eggNOG, Hieranoid, Inparanoid, OMA, OrthoInspector, TreeFam	rs11923657	ECG_traits_and_atrial_fibrilation	Verweij_et_al_2020
133	9	FBgn0265595	CG42683	FastLMM_FastEpistasis	1	0	1	0	1	0	0	FBGN0265595	CG44422	32063	FBgn0265595	CG44422	Human	80333	30083	KCNIP4	7	6.95	moderate	Yes	No	eggNOG, Homologene, OrthoDB, OrthoInspector, Panther, Phylome, RoundUp	rs6817687	Cardiac_hypertrophy	Parsa_et_al_2011
134	18	FBgn0043070	MESK2	FastLMM_FastEpistasis	1	0	0	0	0	1	0	FBGN0043070	MESK2	37451	FBgn0043070	MESK2	Human	57447	14460	NDRG2	10	10.01	moderate	No	Yes	eggNOG, Hieranoid, Inparanoid, OMA, OrthoDB, OrthoFinder, OrthoInspector, Panther, Phylome, RoundUp	rs12889267	Resting_heart_rate	Eppinga_et_al_2016
135	18	FBgn0043070	MESK2	FastLMM_FastEpistasis	1	0	0	0	0	1	0	FBGN0043070	MESK2	37451	FBgn0043070	MESK2	Human	65009	14466	NDRG4	10	9.91	moderate	No	Yes	Compara, eggNOG, Hieranoid, Inparanoid, OMA, OrthoDB, OrthoFinder, OrthoInspector, Panther, Phylome	rs150728296	ECG_traits_and_atrial_fibrilation	Verweij_et_al_2020
136	33	FBgn0261929	CG42796	FastLMM	0	0	0	0	0	1	0	FBGN0261929	5-HT2B	41017	FBgn0261929	5-HT2B	Human	3356	5293	HTR2A	5	5.02	moderate	Yes	No	Hieranoid, OrthoDB, OrthoInspector, Panther, Phylome	rs1575891	Cardiac_hypertrophy	Parsa_et_al_2011
137	49	FBgn0285896	btl	FastLMM	0	0	1	0	1	0	0	FBGN0285896	btl	39564	FBgn0285896	btl	Human	2263	3689	FGFR2	11	10.83	moderate	No	Yes	eggNOG, Hieranoid, Homologene, Inparanoid, OrthoDB, OrthoFinder, OrthoInspector, orthoMCL, Panther, Phylome, TreeFam	rs1078806	ECG_traits_and_atrial_fibrilation	Verweij_et_al_2020
138	51	FBgn0259822	Ca-beta	FastLMM	0	0	1	0	0	0	0	FBGN0259822	Ca-beta	34557	FBgn0259822	Ca-beta	Human	783	1402	CACNB2	11	10.78	moderate	No	Yes	Compara, eggNOG, Hieranoid, Inparanoid, OrthoFinder, OrthoInspector, orthoMCL, Panther, Phylome, RoundUp, TreeFam	rs72786007	ECG_traits_and_atrial_fibrilation	Verweij_et_al_2020
139	101	FBgn0053144	CG33144	FastLMM	1	1	0	0	0	0	0	FBGN0053144	CG33144	36131	FBgn0053144	CG33144	Human	255488	21578	RNF144B	5	4.96	moderate	No	Yes	eggNOG, OrthoFinder, OrthoInspector, Panther, TreeFam	rs9396858	ECG_traits_and_atrial_fibrilation	Verweij_et_al_2020
140	138	FBgn0036168	CG7512	FastLMM	0	1	1	0	0	0	0	FBGN0036168	CG7512	39289	FBgn0036168	CG7512	Human	54897	26002	CASZ1	6	5.86	moderate	Yes	No	Compara, eggNOG, OrthoFinder, orthoMCL, Panther, RoundUp	rs880315	atrial_fibrilation	Roseli_et_al_2018
141	138	FBgn0036168	CG7512	FastLMM	0	1	1	0	0	0	0	FBGN0036168	CG7512	39289	FBgn0036168	CG7512	Human	54897	26002	CASZ1	6	5.86	moderate	Yes	No	Compara, eggNOG, OrthoFinder, orthoMCL, Panther, RoundUp	rs284277	atrial_fibrillation	Nielsen_et_al_2018
142	138	FBgn0036168	CG7512	FastLMM	0	1	1	0	0	0	0	FBGN0036168	CG7512	39289	FBgn0036168	CG7512	Human	54897	26002	CASZ1	6	5.86	moderate	Yes	No	Compara, eggNOG, OrthoFinder, orthoMCL, Panther, RoundUp	rs578347	ECG_traits_and_atrial_fibrilation	Verweij_et_al_2020
143	154	FBgn0029939	CG9650	FastLMM	0	0	1	0	0	0	0	FBGN0029939	CG9650	31660	FBgn0029939	CG9650	Human	53335	13221	BCL11A	11	10.89	moderate	No	Yes	Compara, eggNOG, Hieranoid, Inparanoid, OrthoDB, OrthoFinder, OrthoInspector, Panther, Phylome, RoundUp, TreeFam	rs12713404	Resting_heart_rate	Eppinga_et_al_2016
144	200	FBgn0004623	Gbeta76C	FastLMM	0	0	0	0	0	1	0	FBGN0004623	Gbeta76C	40148	FBgn0004623	Gbeta76C	Human	59345	20731	GNB4	4	4.01	moderate	No	No	eggNOG, OrthoDB, OrthoFinder, Panther	rs4855075	atrial_fibrilation	Roseli_et_al_2018
145	200	FBgn0004623	Gbeta76C	FastLMM	0	0	0	0	0	1	0	FBGN0004623	Gbeta76C	40148	FBgn0004623	Gbeta76C	Human	59345	20731	GNB4	4	4.01	moderate	No	No	eggNOG, OrthoDB, OrthoFinder, Panther	rs7612445	Resting_heart_rate	den_Hoed_et_al_2013
146	200	FBgn0004623	Gbeta76C	FastLMM	0	0	0	0	0	1	0	FBGN0004623	Gbeta76C	40148	FBgn0004623	Gbeta76C	Human	59345	20731	GNB4	4	4.01	moderate	No	No	eggNOG, OrthoDB, OrthoFinder, Panther	rs7612445	atrial_fibrillation	Nielsen_et_al_2018
147	205	FBgn0046113	GluRIIC	FastLMM	0	0	0	0	1	0	0	FBGN0046113	GluRIIC	33275	FBgn0046113	GluRIIC	Human	2898	4580	GRIK2	4	3.94	moderate	Yes	No	Compara, eggNOG, OrthoDB, Panther	rs4520040	Cardiac_hypertrophy	Parsa_et_al_2011
148	235	FBgn0011656	Mef2	FastLMM	0	0	0	0	0	1	0	FBGN0011656	Mef2	36032	FBgn0011656	Mef2	Human	4209	6997	MEF2D	10	9.9	moderate	No	Yes	eggNOG, Hieranoid, Inparanoid, Isobase, OrthoFinder, OrthoInspector, Panther, Phylome, RoundUp, TreeFam	rs2274317	Electrocardiographic_QRS_traits	van_der_Hast_et_al_2016
149	235	FBgn0011656	Mef2	FastLMM	0	0	0	0	0	1	0	FBGN0011656	Mef2	36032	FBgn0011656	Mef2	Human	4209	6997	MEF2D	10	9.9	moderate	No	Yes	eggNOG, Hieranoid, Inparanoid, Isobase, OrthoFinder, OrthoInspector, Panther, Phylome, RoundUp, TreeFam	rs10908504	ECG_traits_and_atrial_fibrilation	Verweij_et_al_2020
150	246	FBgn0014343	mirr	FastLMM	0	0	0	0	1	0	0	FBGN0014343	mirr	39441	FBgn0014343	mirr	Human	50805	6129	IRX4	8	8.09	moderate	No	No	eggNOG, Hieranoid, Inparanoid, OrthoDB, OrthoFinder, OrthoInspector, Panther, RoundUp	rs260399	ECG_traits_and_atrial_fibrilation	Verweij_et_al_2020
151	252	FBgn0259735	CG42389	FastLMM	0	0	0	0	0	0	1	FBGN0259735	CG42389	34987	FBgn0259735	mtgo	Human	64778	24670	FNDC3B	9	8.85	moderate	No	Yes	Compara, Hieranoid, Inparanoid, OrthoFinder, OrthoInspector, orthoMCL, Panther, Phylome, TreeFam	rs9647379	Resting_heart_rate	den_Hoed_et_al_2013
152	252	FBgn0259735	CG42389	FastLMM	0	0	0	0	0	0	1	FBGN0259735	CG42389	34987	FBgn0259735	mtgo	Human	64778	24670	FNDC3B	9	8.85	moderate	No	Yes	Compara, Hieranoid, Inparanoid, OrthoFinder, OrthoInspector, orthoMCL, Panther, Phylome, TreeFam	rs4894803	ECG_traits_and_atrial_fibrilation	Verweij_et_al_2020
153	273	FBgn0050463	CG30463	FastLMM	0	0	1	0	0	0	0	FBGN0050463	CG30463	246627	FBgn0050463	Pgant9	Human	26290	4130	GALNT8	3	2.93	moderate	No	Yes	Compara, eggNOG, Panther	rs10849144	ECG_traits_and_atrial_fibrilation	Verweij_et_al_2020
154	289	FBgn0020379	Rfx	FastLMM	0	1	0	1	0	0	1	FBGN0020379	Rfx	41266	FBgn0020379	Rfx	Human	5992	9985	RFX4	4	3.94	moderate	No	Yes	eggNOG, OrthoDB, OrthoFinder, RoundUp	rs2067615	Resting_heart_rate	den_Hoed_et_al_2013
155	299	FBgn0011260	Sema-2a	FastLMM	0	0	0	0	0	1	0	FBGN0011260	Sema2a	36846	FBgn0011260	Sema2a	Human	6405	10728	SEMA3F	7	6.85	moderate	No	Yes	Compara, eggNOG, Hieranoid, OMA, OrthoFinder, Panther, Phylome	rs1986599	ECG_traits_and_atrial_fibrilation	Verweij_et_al_2020
156	299	FBgn0011260	Sema-2a	FastLMM	0	0	0	0	0	1	0	FBGN0011260	Sema2a	36846	FBgn0011260	Sema2a	Human	10512	10725	SEMA3C	7	6.85	moderate	No	Yes	Compara, eggNOG, Hieranoid, OMA, OrthoFinder, Panther, Phylome	rs6961069	Echocardiographic_LV_mass¬†	Arnett_et_al_2009
[truncated: 50 more rows]

## Sheet: Supplementary File 4c
Fly cardiac MeanGWAS genes and corresponding human orthologues associated to CAD
[truncated: 33 more rows]

## Sheet: Supplementary File 4d
Fly cardiac CVe GWAS genes and corresponding human orthologues identified with DIOPT.
[truncated: 2,156 more rows]

## Sheet: Supplementary File 4e
Fly cardiac CVe GWAS genes and corresponding human orthologues associated to cardiac traits.
[truncated: 195 more rows]

[truncated: 4 more sheets: Supplementary File 4f, Supplementary File 4g, Supplementary File 4h, Supplementary File 4i]
